# Supplementary material for: Up-regulation of the PI3K/AKT and RHO/RAC/PAK signalling pathways in CHK1 inhibitor resistant Eµ-Myc lymphoma cells
Source: PubMed Central journal article supplement (PMC9704644; doi:10.1042/bcj20220103), 2022-10-14
Supplement: BCJ-479-2131-s1.pdf [file BCJ-479-2131-s1.pdf]

## Supplementary Information

### Upregulation of the PI3K/AKT and RHO/RAC/PAK signalling pathways in CHK1 inhibitor resistant E $\mu$ -Myc lymphoma cells

Jill E. Hunter<sup>1</sup>, Amy E. Campbell<sup>2</sup>, Scott Kerridge<sup>1</sup>, Callum Fraser<sup>1</sup>, Nicola L. Hannaway<sup>1</sup>, Saimir Luli<sup>3</sup>, Iglia Ivanova<sup>1</sup>, Philip J. Brownridge<sup>2</sup>, Jonathan Coxhead<sup>1</sup>, Leigh Taylor<sup>1</sup>, Peter Leary<sup>4</sup>, Megan S.R. Hasoon<sup>4</sup> Claire E. Eyers<sup>2\*</sup> and Neil D. Perkins<sup>1\*</sup>

<sup>1</sup> Newcastle University Biosciences Institute  
Wolfson Childhood Cancer Research Centre  
Level 6, Herschel Building  
Newcastle University  
Brewery Lane  
Newcastle upon Tyne, NE1 7RU, UK

<sup>2</sup>Centre for Proteome Research, Department of Biochemistry and Systems Biology,  
Institute of Systems, Molecular and Integrative Biology,  
University of Liverpool,  
Liverpool L69 7ZB, U.K.

<sup>3</sup>Newcastle University Clinical and Translational Research Institute  
Preclinical In Vivo Imaging (PIVI)  
Faculty of Medical Sciences  
Newcastle University  
Newcastle Upon Tyne, NE2 4HH, UK

<sup>4</sup>Bioinformatics Support Unit,  
Faculty of Medical Sciences  
Newcastle University  
Newcastle Upon Tyne, NE2 4HH, UK

\* corresponding authors

Tel. 0191 2088866 Email: [neil.perkins@ncl.ac.uk](mailto:neil.perkins@ncl.ac.uk)

Tel. 0151 794424 Email: [Claire.Eyers@liverpool.ac.uk](mailto:Claire.Eyers@liverpool.ac.uk)

## Supplementary Figure Legends

### Figure S1. Work leading up this study and the key unanswered question

(A) Summary of the work leading up to this study that characterised changes to CHK1 protein and activity in CCT244747 resistant REL<sup>-/-</sup> and RELA<sup>T505A</sup> E $\mu$ -Myc lymphoma cells. In REL<sup>-/-</sup> E $\mu$ -Myc lymphoma cells, CHK1 protein is lost and consistent with this, the phospho and total proteomic signature in the absence of any drug treatment shows a high degree of overlap with that seen in WT E $\mu$ -Myc lymphoma cells that have been treated with the CHK1 inhibitor (CHK1i) CCT244747 [20]. Loss of CHK1 protein in the REL<sup>-/-</sup> E $\mu$ -Myc lymphoma cells is associated with both down regulation of its mRNA and loss of the deubiquitinase (DUB) USP1 that can act to stabilise CHK1 protein [20]. These cells also lose expression of Claspin, an adaptor protein required for ATR phosphorylation and activation of CHK1 [18]. In RELA<sup>T505A</sup> E $\mu$ -Myc lymphoma cells, CHK1 protein is still present [18]. However, after CCT244747 treatment the altered phosphopeptide proteomic signature is different to that seen in WT cells. Fewer phosphopeptides are seen to be changed in the RELA<sup>T505A</sup> E $\mu$ -Myc lymphoma cells, with many of these also being different to those seen in WT cells [18]. Similar to REL<sup>-/-</sup> E $\mu$ -Myc lymphomas, RELA<sup>T505A</sup> cells also have lower levels of Claspin (and USP1, albeit to a lesser extent. Potentially accounting for the altered CCT244747 induced phosphopeptide signature between WT and RELA<sup>T505A</sup> E $\mu$ -Myc lymphoma cells, total proteome data revealed differences in the expression of a number of proteins linked to or known to interact with CHK1 [18]. Consistent with these *in vivo* studies, in U2OS and Huh7 cell line models with CCT244747 resistance we also observed downregulation of CHK1, Claspin and USP1 expression [20].

B) Diagram depicting the aim of this study. WT E $\mu$ -Myc lymphomas, in common with many types of cancer, are dependent upon CHK1 to cope with the high levels of ongoing DNA replication stress. Consequently, treatment with a CHK1 inhibitor (CHK1i) results in tumour cell death due to the accumulation of damaged DNA that ultimately results in genomic catastrophe. In work leading up this study [18, 20], we found that REL<sup>-/-</sup> and RELA<sup>T505A</sup> E $\mu$ -

Myc lymphomas have either lost CHK1 or display altered CHK1 activity respectively [18, 20]. A consequence of this is resistance to treatment with the CHK1i CCT244747 [18, 20]. However, despite these changes, which might be expected to have a similar effect to CHK1i treatment and lead to genomic catastrophe, REL<sup>-/-</sup> and RELA<sup>T505A</sup> E $\mu$ -Myc lymphomas survive. Indeed, these mice show reduced survival times compared to WT controls [18, 20, 24]. We have therefore investigated what other changes are occurring to signalling pathways in REL<sup>-/-</sup> and RELA<sup>T505A</sup> E $\mu$ -Myc lymphomas that promote their continued survival and whether these now represent a vulnerability in cells that have developed CHK1i resistance.

**Figure S2. Correlation analysis of upregulated proteins and phosphopeptides.** Pearson correlation between fold changes ( $\log_2$ ) for proteins/phosphopeptides up-regulated in E $\mu$ -Myc/c-Rel<sup>-/-</sup> lymphomas, and fold changes ( $\log_2$ ) for the same proteins/phosphopeptides in WT E $\mu$ -Myc lymphomas after CCT244747 treatment, with both normalised to control treated WT E $\mu$ -Myc lymphomas. Although there is a weak, positive correlation between the changes to both proteins and phosphopeptides from these conditions (Proteins  $R=0.41$ ,  $p=1.5E-15$ , phosphopeptides  $R=0.29$ ,  $p=0.00019$ ), the magnitude of the fold change seen in WT E $\mu$ -Myc lymphomas after CCT244747 treatment is generally much less than that seen in E $\mu$ -Myc/c-Rel<sup>-/-</sup> lymphomas. Blue dots indicated proteins or phosphopeptides that are upregulated in both conditions. Black dots indicate outlier phosphopeptides that are up-regulated in E $\mu$ -Myc/c-Rel<sup>-/-</sup> lymphomas but downregulated in WT E $\mu$ -Myc lymphomas after CCT244747 treatment. The solid black line represents the linear regression line with the shaded region showing a 95% confidence interval. The dashed line shows where the regression line would fall if fold changes were identical between the compared conditions.

**Figure S3. Analysis of potential AKT targets and phosphorylated kinases identified in E $\mu$ -Myc/c-Rel<sup>-/-</sup> lymphoma phosphoproteomic data**

(A) Table listing potential AKT targets arising from cross referencing upregulated putative phosphosites identified the E $\mu$ -Myc/c-Rel<sup>-/-</sup> lymphomas with a list of known AKT target sites

available on the Cell Signalling Technology website (<https://www.cellsignal.co.uk/learn-and-support/reference-tables/pi3k-akt-substrates-table>). Shown are those sites where the E $\mu$ -Myc/*cRel*<sup>-/-</sup> phospho site is identical to a previously described AKT target site. Also shown are those phosphosites not shown to be an AKT site but where the target protein has been shown to be phosphorylated by AKT elsewhere. See also Supp Data File 2.

(B) Table listing kinases with upregulated phosphosites in E $\mu$ -Myc/*cRel*<sup>-/-</sup> lymphomas. See also Supp Data File 2.

**Figure S4. Proteins with upregulated phosphopeptides in E $\mu$ -Myc/*cRel*<sup>-/-</sup> lymphomas functionally linked to AKT1, ERK1, JNK1, and p38 MAPK.**

Table listing proteins from STRING analysis of proteins with upregulated phosphopeptides in E $\mu$ -Myc/*cRel*<sup>-/-</sup> lymphomas relative to WT E $\mu$ -Myc lymphomas that are functionally linked to the kinases AKT1, ERK1 (MAPK3), JNK1 (MAPK8) and p38 MAPK (MAPK14). Analysis was performed under with medium or high STRING confidence settings as shown. Data from this table was used to create images in Fig. 2. See also Supp Data file 4.

**Figure S5. STRING analysis showing the interaction network of proteins with upregulated phosphopeptides in E $\mu$ -Myc/*cRel*<sup>-/-</sup> lymphomas**

STRING analysis was performed on all proteins with upregulated phosphopeptides in E $\mu$ -Myc/*cRel*<sup>-/-</sup> lymphomas relative to WT E $\mu$ -Myc lymphomas. The image shown shows the functional links identified with the high confidence STRING setting, with no manual addition of the kinases AKT1, ERK1 and JNK1, and with those proteins that have no links to other proteins in the network removed. Proteins linked to AKT1 in Fig. S3 are highlighted in red. DENND1B, FMNL1 and USP8, which are listed in Fig. S3, are not shown as these are only linked to AKT1 and not the other proteins in this network. See also Supp Data File 4.

**Figure S6 Additional western blot analysis of E $\mu$ -Myc protein extracts**

(A) Western blot analysis of phospho-Ser473 AKT, AKT, or ACTIN in snap frozen tumour extracts prepared from more re-implanted E $\mu$ -Myc, E $\mu$ -Myc/c-Rel $^{-/-}$  and E $\mu$ -Myc/RelA<sup>T505A</sup> tumours mouse inguinal lymph nodes 8 hours following a single dose of CCT244747. The data shows that the AKT pathway is highly in E $\mu$ -Myc/c-Rel $^{-/-}$  tumours. Please note that the Actin blot here is different exposure of the one used in Fig S2 (bottom panel) below.

(B) Western blot analysis of phospho-Thr202/Tyr204 ERK1/2, ERK1/2 or ACTIN in snap frozen tumour extracts prepared from two separate sets of mice re-implanted E $\mu$ -Myc, E $\mu$ -Myc/c-Rel $^{-/-}$  and E $\mu$ -Myc/RelA<sup>T505A</sup> tumours mouse inguinal lymph nodes 8 hours following a single dose of CCT244747. The data shows that the ERK pathway is highly active in E $\mu$ -Myc/c-Rel $^{-/-}$  tumours.

(C) Western blot analysis of phospho-Thr183/Tyr185 JNK1/2, JNK1/2, phospho-Thr180/Tyr182 p38, p38 or ACTIN in snap frozen tumour extracts prepared from two separate sets of mice re-implanted E $\mu$ -Myc, E $\mu$ -Myc/c-Rel $^{-/-}$  tumours and E $\mu$ -Myc/RelA<sup>T505A</sup> tumours mouse inguinal lymph nodes 8 hours following a single dose of CCT244747. The data shows that the JNK/p38 pathway signalling is reduced in E $\mu$ -Myc/c-Rel $^{-/-}$  tumours. Please note some of the actin blots used here are replicated in another paper (Fig S2C & S6B [20]), where they are used as the controls for USP1 and USP14 expression, also analysed using these membranes. Please note that the Actin blots from upper and lower p38 panels in this figure are also used in another study (Fig. 5C middle panel, Fig S6A lower panel [20], where the same membrane was probed with antibodies to other proteins.

(D) Western blot analysis of PEA15, or ACTIN in snap frozen tumour extracts prepared from re-implanted E $\mu$ -Myc, E $\mu$ -Myc/c-Rel $^{-/-}$  and E $\mu$ -Myc/RelA<sup>T505A</sup> tumours mouse inguinal lymph nodes 8 hours following a single dose of CCT244747. Please note that the Actin blot used in this figure is the same as that in S5C above (lower JNK panel). They were part of the same original western membrane but now split between 2 figures.

**Figure S7. Additional data showing the response of reimplanted E $\mu$ -Myc lymphomas to GDC-0941/Pictilisib**

(A) Scatter plot showing the response of two further reimplanted E $\mu$ -Myc, E $\mu$ -Myc/c-Rel $^{-/-}$  and E $\mu$ -Myc/RelA<sup>T505A</sup> tumours and their response to GDC-0941/Pictilisib in the cervical lymph node tumour sites. Each of the tumours was implanted into 6 syngeneic recipient C57Bl/6 mice, 3 were treated with GDC-0941/Pictilisib (100 mg/kg p.o), and 3 with vehicle control, for 9 days once tumours became palpable. A response was defined as a significant reduction (or increase) in tumour burden ( $P < 0.05$ ) using unpaired Student's t-tests. WT E $\mu$ -Myc showed little response to GDC-0941/Pictilisib whereas the E $\mu$ -Myc/c-Rel $^{-/-}$  and E $\mu$ -Myc/RelA<sup>T505A</sup> tumours were reduced by GDC-0941/Pictilisib.

(B) Table with all lymphoid organ weights in mice that had been implanted with E $\mu$ -Myc, E $\mu$ -Myc/c-Rel $^{-/-}$  or E $\mu$ -Myc/RelA<sup>T505A</sup> and treated with GDC-0941/Pictilisib or vehicle control. WT E $\mu$ -Myc showed little response to GDC-0941/Pictilisib whereas the E $\mu$ -Myc/c-Rel $^{-/-}$  and E $\mu$ -Myc/RelA<sup>T505A</sup> tumours were reduced by GDC-0941/Pictilisib.

**Fig. S8. Additional analysis of upregulation of RHO/RAC pathway members**

(A) Venn diagram depicting the lack of overlap between phosphopeptides upregulated in E $\mu$ -Myc/c-Rel $^{-/-}$  and E $\mu$ -Myc/RelA<sup>T505A</sup> tumours, relative to WT E $\mu$ -Myc controls.

(B) Bar plot (gene number on x axis, and coloured by adj pval) showing GO enrichment analysis from the E $\mu$ -Myc/RelA<sup>T505A</sup> RNA-Seq data shown in Fig. 3B.

(C & D) Q-PCR validation of RNA-Seq analysis. Relative *Trio* (B) and *Tiam1* (C) transcript levels are significantly up-regulated in tumours from E $\mu$ -Myc/c-Rel $^{-/-}$  (n=5) when compared with E $\mu$ -Myc WTs (n=5). Data represents mean  $\pm$  SEM.  $p^* < 0.05$ ,  $p^{**} < 0.01$ , (One-way ANOVA with multiple comparison analysis). Data represents mean  $\pm$  SEM, each point is an individual mouse.

**Fig. S9. Additional data looking at the upregulation and role of PAK2 in E $\mu$ -Myc/RelA<sup>T505A</sup> lymphomas.**

(A) Western blot analysis of phospho-PAK1/2 (T423/T402) or ACTIN in snap frozen tumour extracts prepared from re-implanted E $\mu$ -Myc and E $\mu$ -Myc/RelA<sup>T505A</sup> tumours from inguinal lymph nodes 8 hours following a single dose of CCT244747. The data shows that the signaling through PAK1/2 pathway is highly active in the E $\mu$ -Myc/RelA<sup>T505A</sup> cells.

(B) Western blot analysis of phospho-PAK1/2 (T423/T402), PAK1/2 or ACTIN in snap frozen tumour extracts prepared from re-implanted E $\mu$ -Myc and E $\mu$ -Myc/c-Rel<sup>-/-</sup> tumours from inguinal lymph nodes 8 hours following a single dose of CCT244747. The data shows that the signaling through PAK1/2 pathway is highly active in the E $\mu$ -Myc/c-Rel<sup>-/-</sup> cells.

(C) Scatter showing the response of two further reimplanted E $\mu$ -Myc and E $\mu$ -Myc/RelA<sup>T505A</sup> tumours and their response to PF-3758309 in the cervical lymph node tumour site. Each of tumour was implanted into 6 syngeneic recipient C57Bl/6 mice, 3 were treated with PF-3758309 (12 mg/kg i.p.), and 3 with vehicle control, for 7 days once tumours became palpable. A response was defined as a significant reduction (or increase) in tumour burden (P<0.05) using unpaired Student's t-tests. WT E $\mu$ -Myc showed little response to PF-3758309 whereas the E $\mu$ -Myc/RelA<sup>T505A</sup> tumours were reduced by PF-3758309.

(D) Table with all lymphoid organ weights in mice that had been implanted with E $\mu$ -Myc or E $\mu$ -Myc/RelA<sup>T505A</sup> and treated with PF-3758309 or vehicle control. WT E $\mu$ -Myc showed little response to PF-3758309 whereas the E $\mu$ -Myc/RelA<sup>T505A</sup> tumours were reduced by PF-3758309.

## **Supplementary data files**

### **Supp Data File 1 All proteomics data.xlsx**

Data from proteomics analysis of reimplanted E $\mu$ -Myc lymphoma cells with either vehicle or CHK1i (CCT244747) treatment for 8 hours. Please note, this data file also accompanies two other manuscripts where we use E $\mu$ -Myc lymphoma cells [18, 20].

### **Supp Data File 2 Proteomics data analysis.xlsx**

Analysis of upregulated phosphopeptides and phosphosites in E $\mu$ -Myc Rel $^{-/-}$  lymphomas versus WT E $\mu$ -Myc lymphomas

### **Supp Data File 3 Venn diagrams.xlsx**

Data files from Venn analysis of E $\mu$ -Myc lymphoma cell proteomics used in this paper

### **Supp Data File 4 STRING interactions.xlsx**

STRING interaction data of the analysis between phosphopeptides and proteins upregulated in c-Rel null versus WT E $\mu$ -Myc lymphomas.

### **Supp Data File 5 RNASeq\_all\_genes\_list\_EuMyc.xlsx**

Gene lists from RNA Seq analysis of reimplanted E $\mu$ -Myc lymphoma cells with either vehicle or CHK1i (CCT244747) treatment for 8 hours. Please note, this data file also accompanies two other manuscripts where we use E $\mu$ -Myc lymphoma cells [18, 20].

### **Supp Data File 6 RNASeq\_counts\_timport\_EuMyc.xlsx**

Data for all genes and samples from RNA Seq analysis of reimplanted E $\mu$ -Myc lymphoma cells. Please note, this data file also accompanies two other manuscripts where we use E $\mu$ -Myc lymphoma cells [18, 20].



**A**

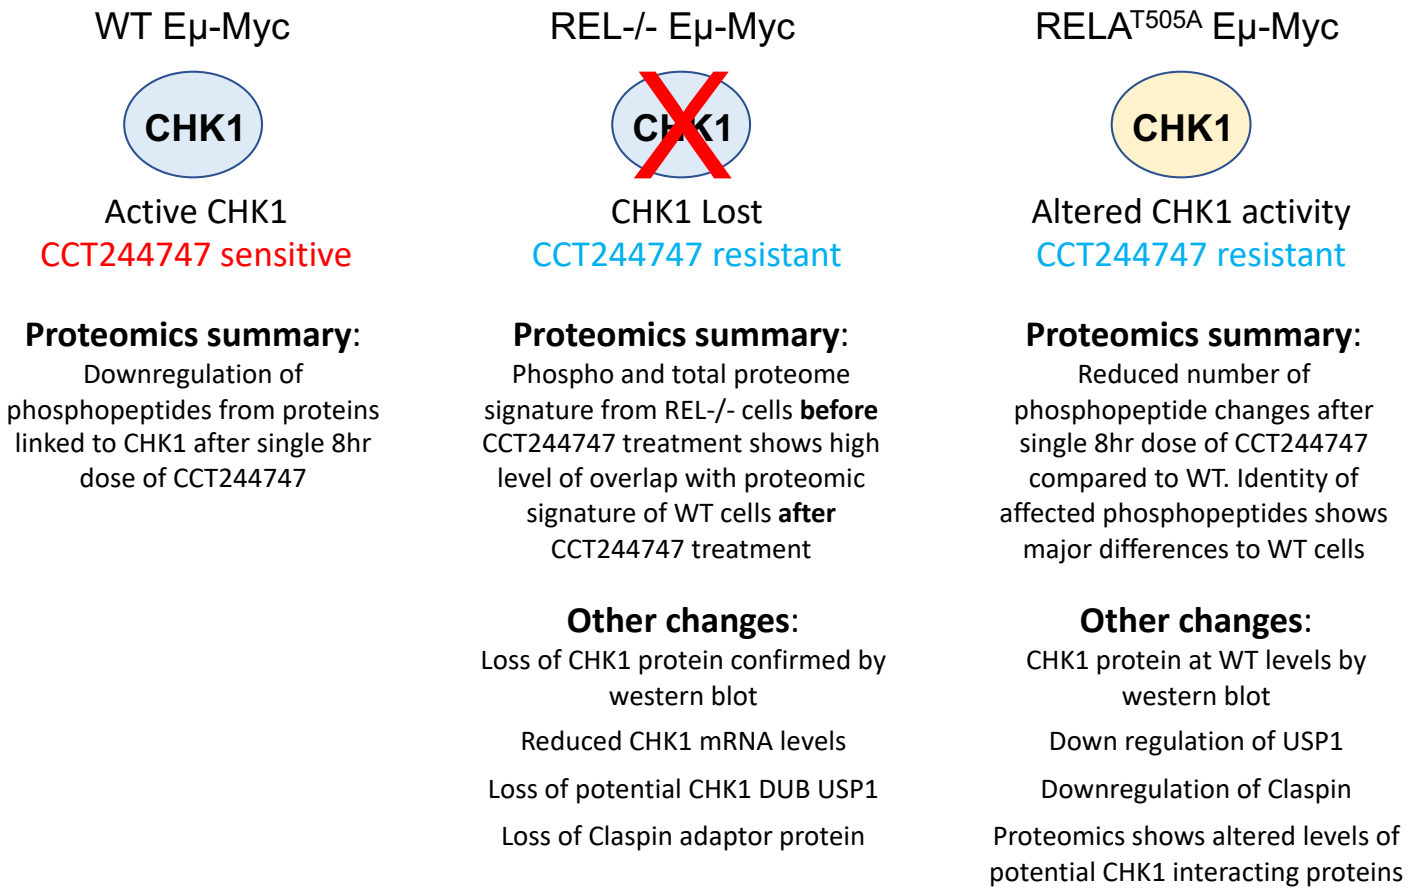

**B**

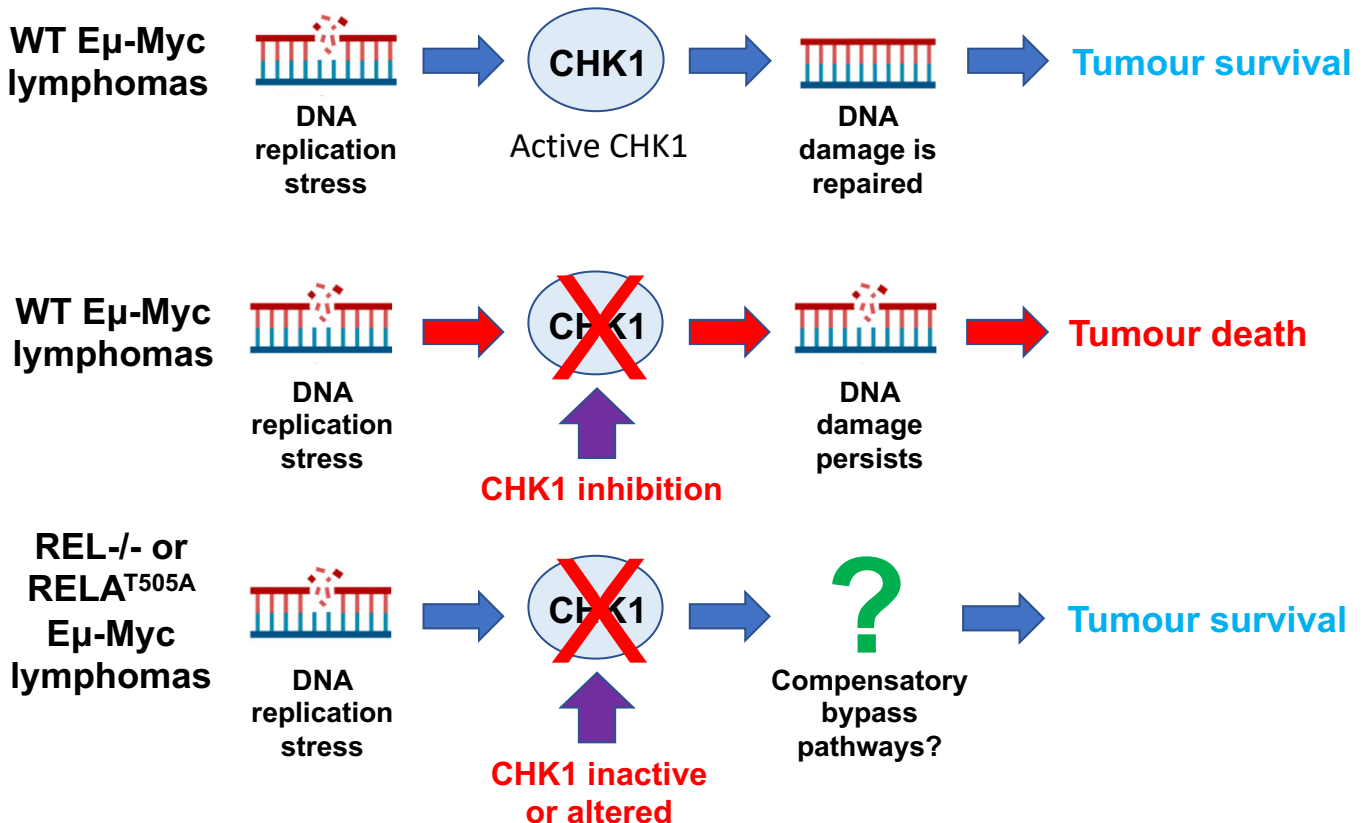

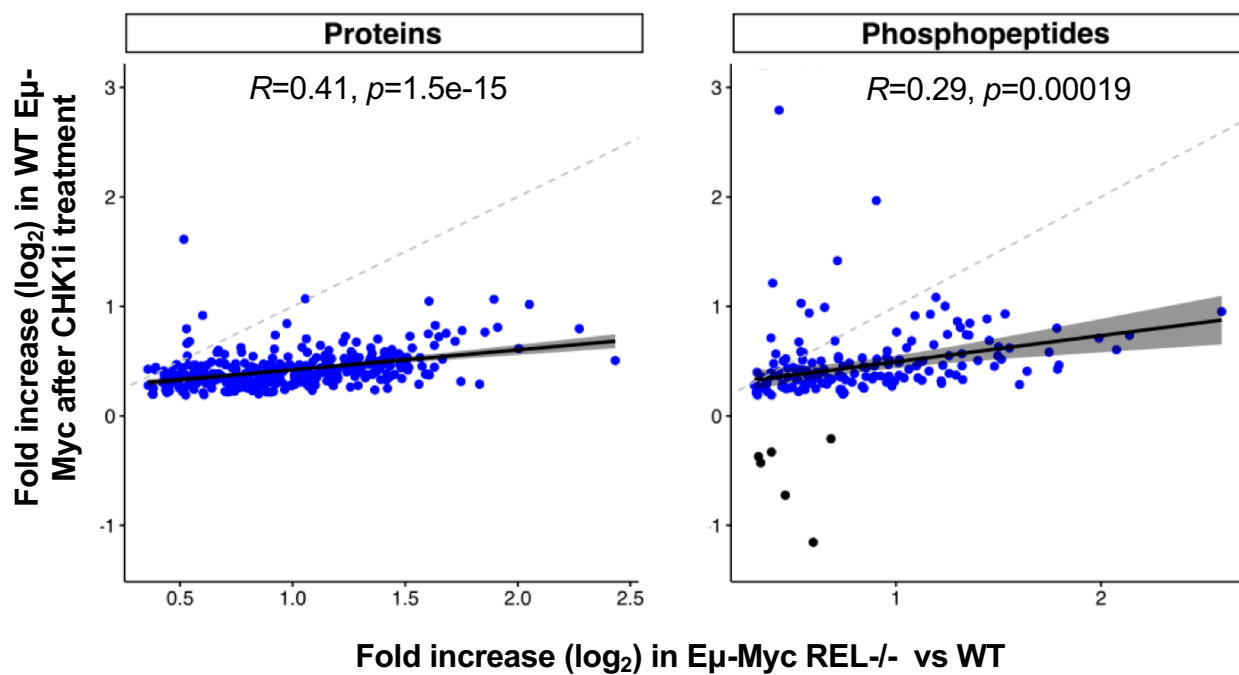

**A**

| Symbol | Phosphosite (mouse, E $\mu$ -Myc) | Protein Accession | Fold induced in Rel-/- vs WT (log2) | p-value  | CST phosphosite(s) (human) | CST name (if different) |
|--------|-----------------------------------|-------------------|-------------------------------------|----------|----------------------------|-------------------------|
| Akt1s1 | Akt1s1_T247                       | Q9D1F4            | 1.19                                | 3.51E-04 | T246                       | PRAS40                  |
| Bcl10  | Bcl10_S141                        | Q9Z0H7            | 0.59                                | 1.79E-02 | S218, S231                 |                         |
| Dnmt1  | Dnmt1_S125                        | P13864            | 0.43                                | 4.37E-02 | S143                       |                         |
| Ep300  | Ep300_S1037                       | B2RWS6            | 0.46                                | 3.20E-02 | S1834                      | p300                    |
| Foxo1  | Foxo1_S467                        | Q9R1E0            | 0.46                                | 2.29E-02 | S256, S319, T24            | FOXO1a                  |
| Foxo1  | Foxo1_S284                        | Q9R1E0            | 0.34                                | 4.35E-02 |                            |                         |
| Foxo1  | Foxo1_S467                        | Q9R1E0            | 0.33                                | 3.31E-02 |                            |                         |
| Hspb1  | Hspb1_S86                         | P14602            | 0.87                                | 1.07E-02 | S82                        | HSP27                   |
| Palld  | Palld_S901                        | Q9ET54            | 1.09                                | 1.43E-02 | S1118                      | palladin                |
| Pdcd4  | Pdcd4_S94                         | Q61823            | 0.93                                | 1.79E-03 | S67, S457                  |                         |
| Pea15  | Pea15_S116                        | Q62048            | 3.14                                | 6.68E-03 | S116                       |                         |
| Pea15  | Pea15_S116                        | Q62048            | 1.31                                | 8.75E-04 |                            |                         |
| Pea15  | Pea15_S116                        | Q62048            | 0.74                                | 8.84E-04 |                            |                         |
| Ranbp3 | Ranbp3_S40;S33                    | Q9CT10            | 0.50                                | 1.97E-02 | S126                       |                         |
| Ranbp3 | Ranbp3_S40;S32;S33                | Q9CT10            | 0.44                                | 3.52E-02 |                            |                         |
| Ranbp3 | Ranbp3_S283                       | Q9CT10            | 0.40                                | 1.30E-02 |                            |                         |
| Ranbp3 | Ranbp3_[S58/T60]                  | Q9CT10            | 0.34                                | 2.30E-02 |                            |                         |
| Rps3   | Rps3_T221                         | P62908            | 1.41                                | 1.68E-02 | T70                        |                         |
| Usp8   | Usp8_S680                         | Q80U87            | 0.70                                | 1.77E-02 | T945                       |                         |
| Wnk1   | Wnk1_S185                         | P83741            | 0.80                                | 2.02E-03 | T60                        |                         |
| Yap1   | Yap1_S149                         | P46938            | 0.32                                | 2.74E-02 | S127                       |                         |
| Yap1   | Yap1_[S46/T48]                    | P46938            | 0.31                                | 3.91E-02 |                            |                         |
| Zyx    | Zyx_S336                          | Q62523            | 0.44                                | 1.51E-02 | S142                       | zyxin                   |

**B**

| Symbol  | Phosphosite(s) (mouse, E $\mu$ -Myc) | Protein Accession | Fold induced in Rel-/- vs WT (log2) | p-value  |
|---------|--------------------------------------|-------------------|-------------------------------------|----------|
| Aak1    | Aak1_S729                            | Q3UJH0            | 0.60                                | 1.12E-02 |
| Bckdk   | Bckdk_S31                            | O55028            | 0.43                                | 1.18E-02 |
| Bmp2k   | Bmp2k_S908                           | Q91Z96            | 0.95                                | 6.23E-03 |
| Cdk11b  | Cdk11b_S115                          | P24788            | 0.68                                | 4.04E-03 |
| Cdk13   | Cdk13_[S1146/T1147]                  | Q69ZA1            | 0.31                                | 2.56E-02 |
| Map4k1  | Map4k1_S370;[S375/Y379]              | P70218            | 0.46                                | 4.20E-02 |
| Map4k4  | Map4k4_S701                          | P97820            | 0.65                                | 1.73E-03 |
| Mapk14  | Mapk14_Y182                          | P47811            | 1.09                                | 1.47E-02 |
| Mink1   | Mink1_S729                           | Q9JM52            | 0.36                                | 3.12E-02 |
| Pi4k2a  | Pi4k2a_S47                           | Q2TBE6            | 0.39                                | 1.74E-02 |
| Prkab1  | Prkab1_S108                          | Q9R078            | 0.75                                | 6.22E-03 |
| Prkar1a | Prkar1a_S83                          | Q9DBC7            | 1.19                                | 9.02E-03 |
| Prkar2b | Prkar2b_S112                         | P31324            | 0.56                                | 4.18E-02 |
| Prpf4b  | Prpf4b_Y849                          | Q61136            | 0.99                                | 3.29E-02 |
| Snrk    | Snrk_S569                            | Q8VDU5            | 0.48                                | 2.13E-02 |
| Stk10   | Stk10_S437                           | O55098            | 0.43                                | 1.37E-02 |
| Stk4    | Stk4_S418                            | Q9JI11            | 1.53                                | 2.62E-05 |
| Stk4    | Stk4_S320                            | Q9JI11            | 1.16                                | 1.24E-04 |
| Tnik    | Tnik_S737                            | P83510            | 0.89                                | 1.52E-03 |
| Wnk1    | Wnk1_S185                            | P83741            | 0.80                                | 2.02E-03 |

Hunter et al., Fig. S4

| AKT1     |          | ERK1 (MAPK3) |          | JNK1 (MAPK8) |        | p38 MAPK (MAPK14) |        |
|----------|----------|--------------|----------|--------------|--------|-------------------|--------|
| Medium   | High     | Medium       | High     | Medium       | High   | Medium            | High   |
| ABI1     | ABI1     | ABI1         | ABI1     | BCL10        | BCL10  | AKAP13            | EP300  |
| ACACA    | AKT1S1   | AKT1S1       | BCL10    | EP300        | EP300  | BCL10             | FOXO1  |
| AKT1S1   | BCL10    | BCL10        | EP300    | FLNA         | FLNA   | BNIP2             | HSPB1  |
| ARHGAP1  | CFL1     | CANX         | FN1      | FN1          | FOXO1  | CDK13             | LSP1   |
| ARHGEF6  | CRTC2    | CFL1         | FOXO1    | FOXO1        | MAPK14 | EP300             | MEF2C  |
| BCL10    | DENND1B  | CIC          | HSP90AA1 | HDAC1        | MYC    | FLNA              | MYC    |
| CANX     | DKC1     | EP300        | HSP90AB1 | HSP90AA1     | NCOA3  | FN1               | NCOA3  |
| CD2AP    | DOCK2    | FLNA         | IKZF3    | HSPB1        | NFATC2 | FOXO1             | NFATC2 |
| CFL1     | EP300    | FN1          | MAPK14   | IRF3         | NFKB1  | HDAC1             | NFKB1  |
| CRTC2    | FMNL1    | FOXO1        | MYC      | MAP1B        | PXN    | HSP90AA1          | SLC9A1 |
| DENND1B  | FN1      | GTF2I        | NFATC2   | MAPK14       | SPAG9  | HSP90AB1          | SPAG9  |
| DKC1     | FOXO1    | HDAC1        | NFKB1    | MYC          |        | HSPB1             |        |
| DNMT1    | HSP90AA1 | HDAC2        | PEA15    | NCOA3        |        | LCP1              |        |
| DOCK2    | HSP90AB1 | HNRNP2       | PRKAR1A  | NFATC2       |        | LSP1              |        |
| EIF2B5   | HSPB1    | HSP90AA1     | PRKAR2B  | NFKB1        |        | MEF2C             |        |
| EML4     | LAMTOR1  | HSP90AB1     | PTGES3   | PXN          |        | MYC               |        |
| EP300    | MAPK14   | HSPB1        | PXN      | SPAG9        |        | NCOA3             |        |
| EPST11   | MEF2C    | IKZF3        | SLC9A1   | YAP1         |        | NFATC2            |        |
| FLNA     | MYC      | IRF3         | VCL      |              |        | NFKB1             |        |
| FMNL1    | NFKB1    | MAPK14       |          |              |        | PTPRC             |        |
| FN1      | NPM1     | MEF2C        |          |              |        | PXN               |        |
| FOXO1    | PA2G4    | MYC          |          |              |        | SLC9A1            |        |
| GTF2I    | PML      | NES          |          |              |        | SPAG9             |        |
| HDAC1    | PTGES3   | NFATC2       |          |              |        |                   |        |
| HDAC2    | PXN      | NFKB1        |          |              |        |                   |        |
| HNRNPA1  | SPAG9    | PEA15        |          |              |        |                   |        |
| HSP90AA1 | STUB1    | PRKAR1A      |          |              |        |                   |        |
| HSP90AB1 | USP8     | PRKAR2B      |          |              |        |                   |        |
| HSPB1    | VCL      | PTGES3       |          |              |        |                   |        |
| IRF3     |          | PTPRC        |          |              |        |                   |        |
| LAMTOR1  |          | PXN          |          |              |        |                   |        |
| LCP1     |          | SLC9A1       |          |              |        |                   |        |
| MAPK14   |          | STUB1        |          |              |        |                   |        |
| MARCKS   |          | TRIM28       |          |              |        |                   |        |
| MEF2C    |          | VCL          |          |              |        |                   |        |
| MYC      |          | YAP1         |          |              |        |                   |        |
| MYH9     |          |              |          |              |        |                   |        |
| NCOA3    |          |              |          |              |        |                   |        |
| NES      |          |              |          |              |        |                   |        |
| NFATC2   |          |              |          |              |        |                   |        |
| NFKB1    |          |              |          |              |        |                   |        |
| NPM1     |          |              |          |              |        |                   |        |
| PA2G4    |          |              |          |              |        |                   |        |
| PACSIN1  |          |              |          |              |        |                   |        |
| PALLD    |          |              |          |              |        |                   |        |
| PDCD4    |          |              |          |              |        |                   |        |
| PEA15    |          |              |          |              |        |                   |        |
| PML      |          |              |          |              |        |                   |        |
| PPIG     |          |              |          |              |        |                   |        |
| PPP1R12A |          |              |          |              |        |                   |        |
| PRKAB1   |          |              |          |              |        |                   |        |
| PTGES3   |          |              |          |              |        |                   |        |
| PTPRC    |          |              |          |              |        |                   |        |
| PXN      |          |              |          |              |        |                   |        |
| SLC9A1   |          |              |          |              |        |                   |        |
| SLC9A3R1 |          |              |          |              |        |                   |        |
| SPAG9    |          |              |          |              |        |                   |        |
| SRSF1    |          |              |          |              |        |                   |        |
| STK4     |          |              |          |              |        |                   |        |
| STUB1    |          |              |          |              |        |                   |        |
| TFEB     |          |              |          |              |        |                   |        |
| TP53BP1  |          |              |          |              |        |                   |        |
| USP7     |          |              |          |              |        |                   |        |
| USP8     |          |              |          |              |        |                   |        |
| VASP     |          |              |          |              |        |                   |        |
| VCL      |          |              |          |              |        |                   |        |
| WDR44    |          |              |          |              |        |                   |        |
| YAP1     |          |              |          |              |        |                   |        |
| ZYX      |          |              |          |              |        |                   |        |

Hunter et al., Figure S5

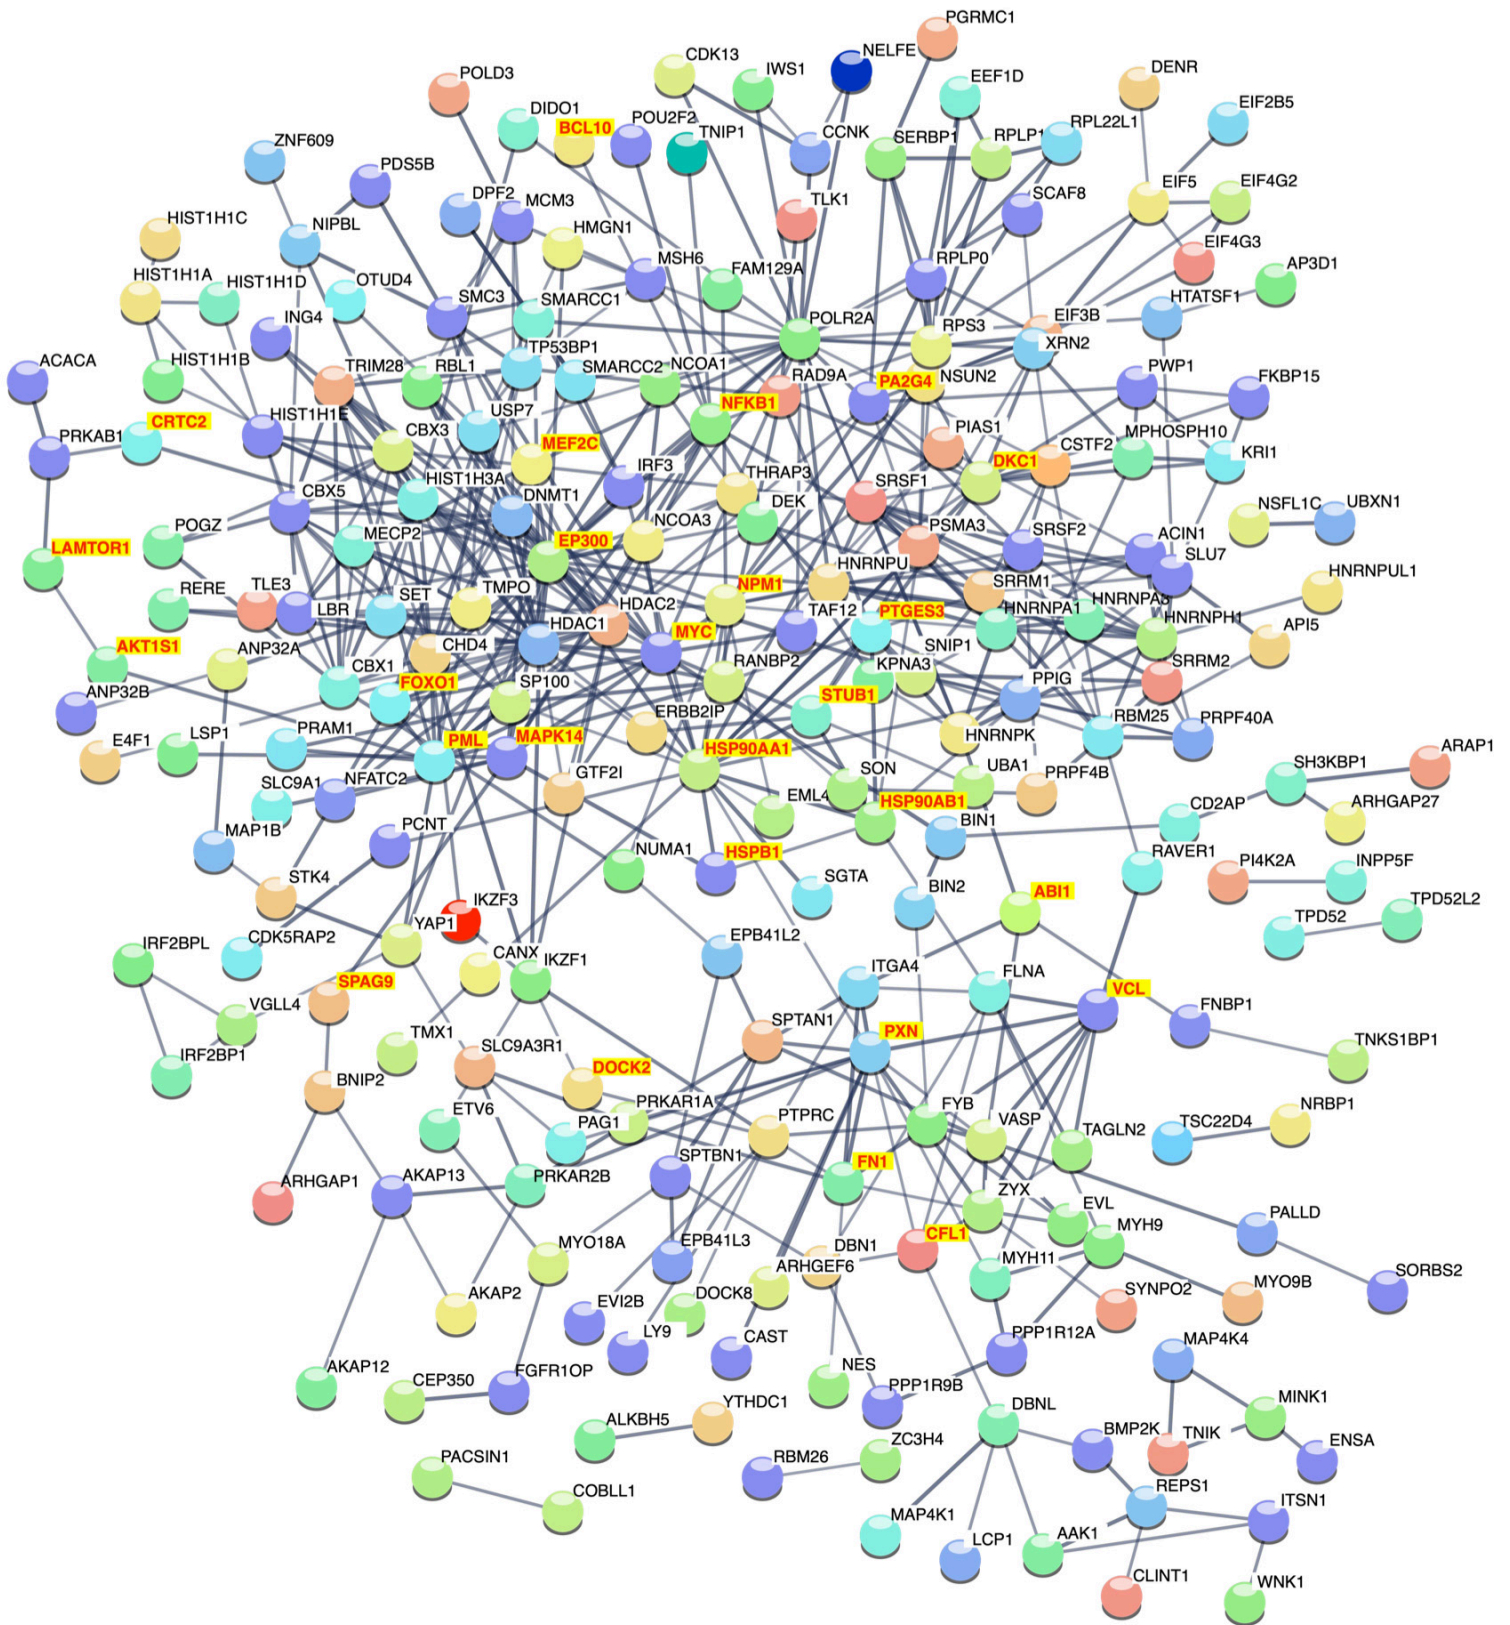

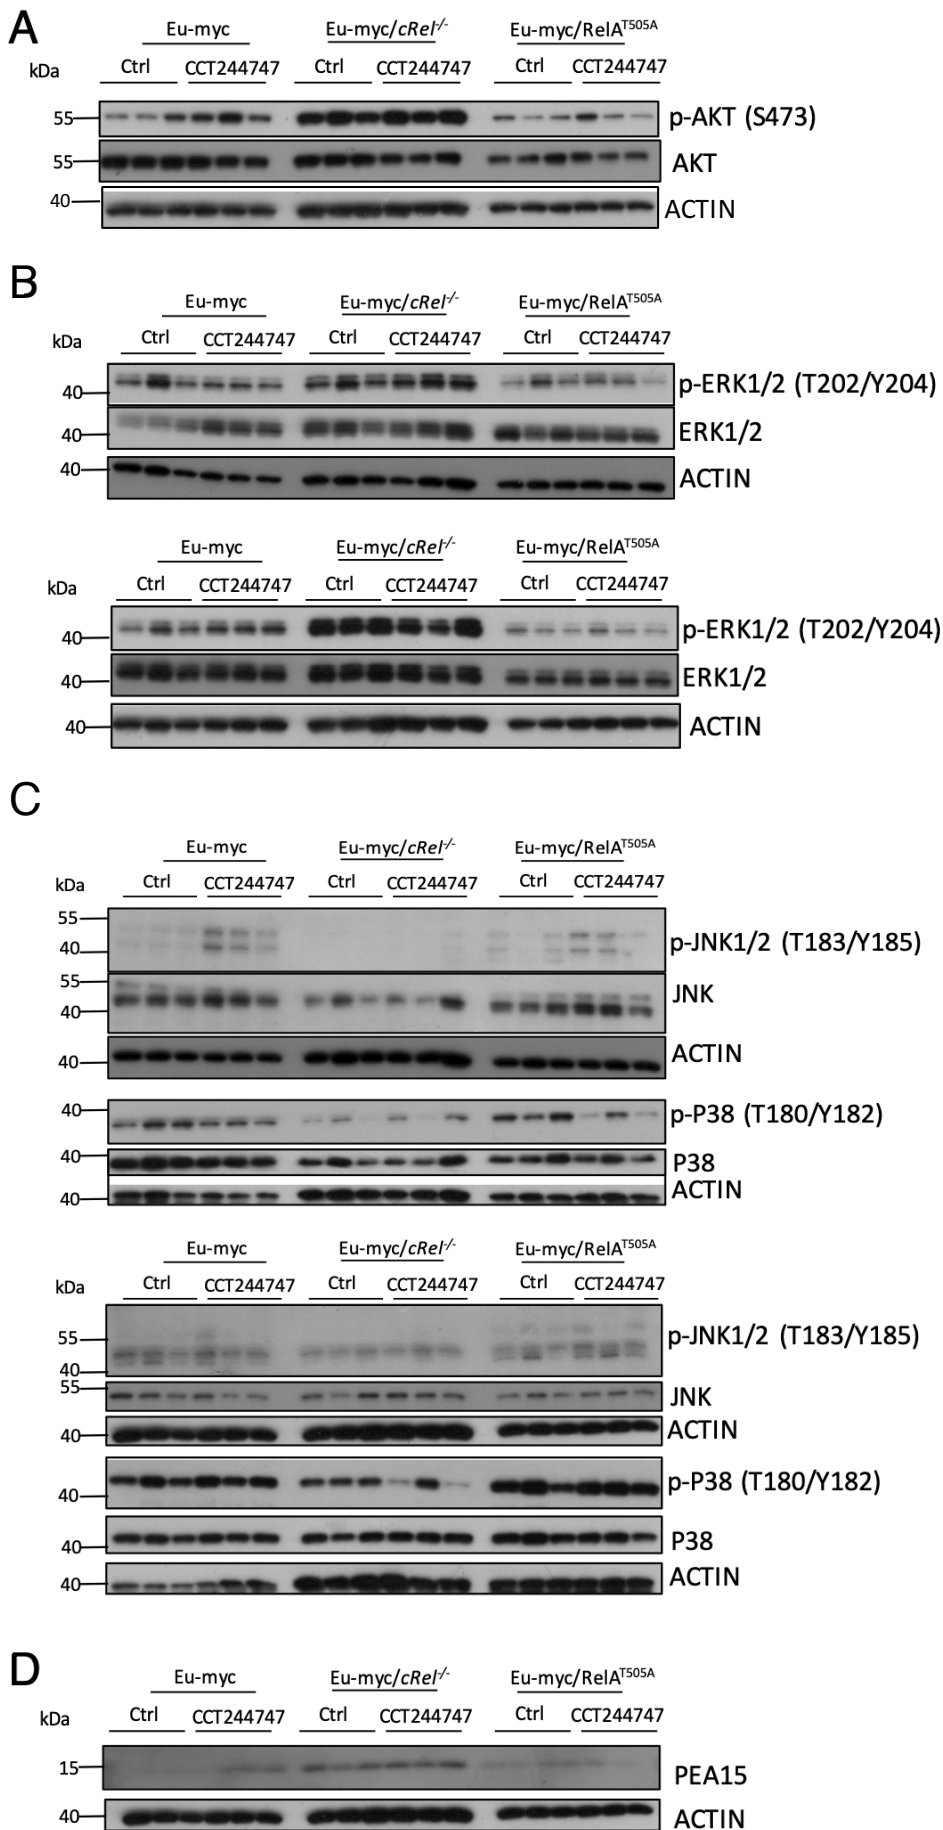

Hunter et al., Figure S7

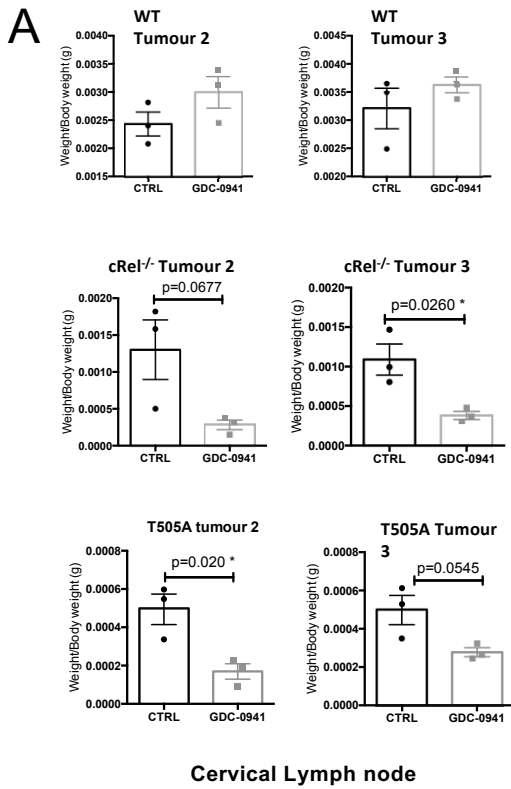

**B**

| Tumour                        | Lymphoid organ weight/Bodyweight (mg) |          |             |          |               |          |             |          |         |          |         |          |
|-------------------------------|---------------------------------------|----------|-------------|----------|---------------|----------|-------------|----------|---------|----------|---------|----------|
|                               | Inguinal LN                           |          | Brachial LN |          | Mesenteric LN |          | Cervical LN |          | Spleen  |          | Thymus  |          |
|                               | Control                               | GDC-0941 | Control     | GDC-0941 | Control       | GDC-0941 | Control     | GDC-0941 | Control | GDC-0941 | Control | GDC-0941 |
| Eu-myc 1                      | 2.76                                  | 3.36     | 2.36        | 2.35     | 11.23         | 10.09    | 2.96        | 5.02     | 13.10   | 13.60    | 5.67    | 4.78     |
|                               | 2.55                                  | 2.68     | 1.24        | 2.48     | 5.89          | 9.68     | 3.64        | 3.74     | 18.73   | 14.47    | 8.75    | 5.07     |
|                               | 3.61                                  | 2.96     | 2.97        | 2.31     | 8.45          | 8.97     | 2.08        | 2.77     | 15.19   | 15.85    | 4.88    | 6.91     |
| Eu-myc 2                      | 3.74                                  | 3.30     | 2.21        | 5.10     | 7.32          | 7.75     | 2.81        | 3.13     | 18.38   | 14.34 *  | 6.81    | 9.69     |
|                               | 2.78                                  | 2.93     | 1.37        | 3.39     | 9.68          | 7.78     | 2.08        | 3.93     | 20.71   | 14.95    | 8.90    | 3.84     |
|                               | 3.23                                  | 3.40     | 3.07        | 3.84     | 9.54          | 12.02    | 2.40        | 2.45     | 17.74   | 15.19    | 6.24    | 9.30     |
| Eu-myc 3                      | 2.50                                  | 2.71     | 1.78        | 3.43     | 5.64          | 7.70     | 3.65        | 3.87     | 16.74   | 12.94    | 6.07    | 7.48     |
|                               | 2.48                                  | 3.39     | 2.13        | 1.11     | 8.79          | 9.72     | 3.49        | 3.63     | 17.00   | 15.99    | 6.50    | 7.32     |
|                               | 3.05                                  | 3.03     | 1.98        | 6.42     | 6.98          | 12.26    | 2.49        | 3.37     | 20.50   | 17.47    | 6.98    | 6.38     |
| Eu-myc/c-Rel <sup>-/-</sup> 1 | 0.44                                  | 0.04 *   | 0.48        | 0.19 *   | 1.03          | 0.98     | 0.33        | 0.04 *   | 5.91    | 2.15     | 1.36    | 1.16     |
|                               | 0.31                                  | 0.27     | 0.45        | 0.28     | 1.25          | 1.30     | 0.24        | 0.08     | 4.09    | 5.80     | 1.56    | 1.45     |
|                               | 0.35                                  | 0.06     | 0.68        | 0.05     | 1.51          | 1.07     | 0.75        | 0.10     | 10.94   | 2.49     | 1.02    | 2.01     |
| Eu-myc/c-Rel <sup>-/-</sup> 2 | 2.65                                  | 0.57     | 2.65        | 0.44     | 5.78          | 1.82 *   | 1.58        | 0.14     | 9.40    | 1.23     | 3.84    | 1.23 **  |
|                               | 1.93                                  | 1.97     | 1.22        | 1.67     | 4.09          | 3.86     | 0.50        | 0.31     | 3.09    | 2.12     | 3.09    | 2.12     |
|                               | 3.28                                  | 0.75     | 2.45        | 0.33     | 5.73          | 2.57     | 1.82        | 0.38     | 3.76    | 1.79     | 3.76    | 1.79     |
| Eu-myc/c-Rel <sup>-/-</sup> 3 | 0.71                                  | 0.52     | 1.28        | 0.35 *   | 3.74          | 2.38 *   | 0.80        | 0.30 **  | 9.62    | 6.72     | 2.61    | 1.35     |
|                               | 1.79                                  | 1.10     | 2.61        | 0.56     | 3.53          | 3.07     | 1.47        | 0.37     | 13.51   | 8.80     | 3.77    | 2.57     |
|                               | 2.11                                  | 0.89     | 2.85        | 0.74     | 4.09          | 2.30     | 0.99        | 0.48     | 18.37   | 8.67     | 4.29    | 2.52     |
| Eu-myc/T505A 1                | 0.39                                  | 0.18     | 0.70        | 0.34     | 4.99          | 0.77     | 0.35        | 0.26     | 29.37   | 27.49    | 2.61    | 1.31     |
|                               | 0.85                                  | 0.45     | 1.07        | 0.44     | 2.09          | 1.00     | 0.53        | 0.32     | 38.91   | 35.37    | 1.35    | 1.57     |
|                               | 0.55                                  | 0.28     | 0.56        | 0.50     | 2.34          | 1.06     | 0.61        | 0.24     | 24.61   | 18.88    | 2.52    | 1.86     |
| Eu-myc/T505A 2                | 0.88                                  | 0.38     | 1.17        | 0.50     | 2.25          | 0.78 **  | 0.34        | 0.22 *   | 27.28   | 18.22 ** | 1.86    | 1.68     |
|                               | 1.05                                  | 0.34     | 0.58        | 0.78     | 1.99          | 0.92     | 0.55        | 0.19     | 25.02   | 18.60    | 1.30    | 1.39     |
|                               | 0.37                                  | 0.34     | 0.78        | 0.50     | 2.80          | 1.18     | 0.60        | 0.09     | 30.13   | 18.88    | 3.58    | 1.43     |
| Eu-myc/T505A 3                | 0.77                                  | 0.28 *   | 0.81        | 0.30 *   | 1.44          | 1.06     | 0.65        | 0.10 **  | 31.37   | 25.57 *  | 1.69    | 1.30     |
|                               | 0.68                                  | 0.41     | 0.57        | 0.38     | 1.39          | 1.57     | 0.49        | 0.08     | 26.90   | 19.12    | 2.25    | 1.88     |
|                               | 0.77                                  | 0.52     | 0.69        | 0.45     | 1.12          | 0.78     | 0.50        | 0.10     | 35.77   | 19.53    | 1.56    | 1.86     |

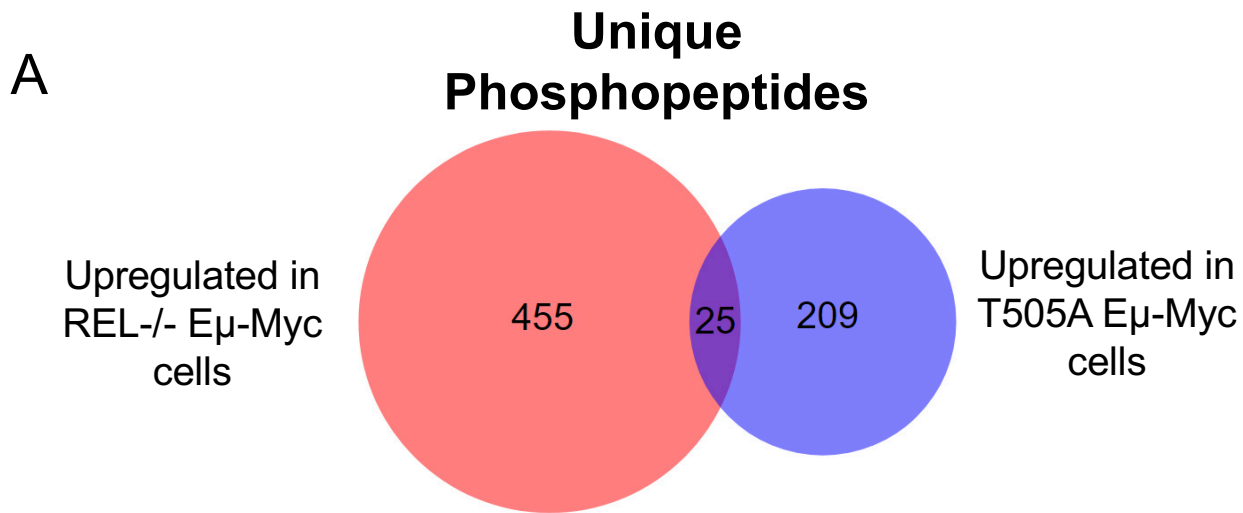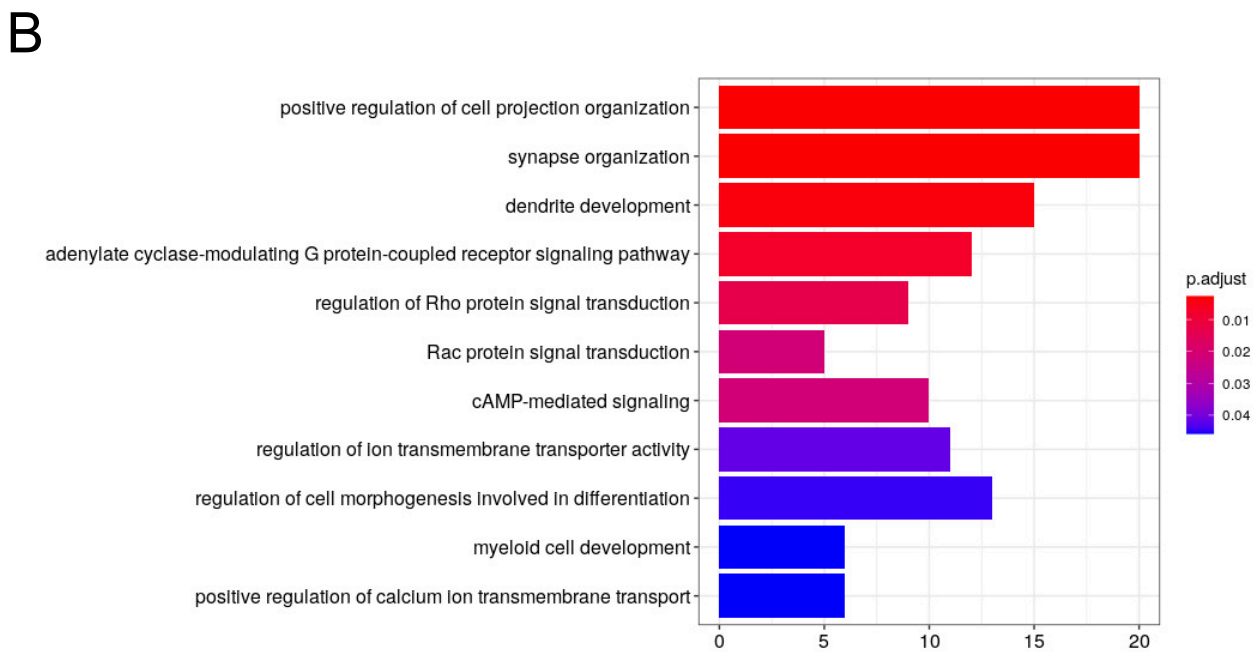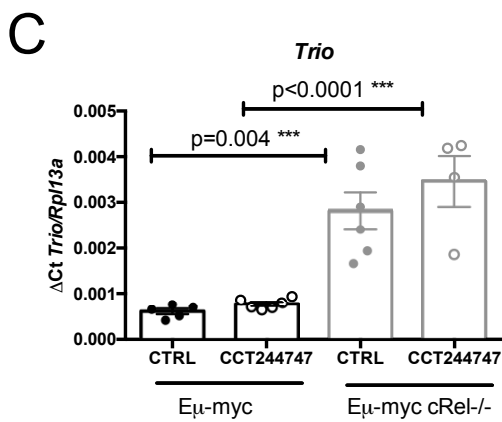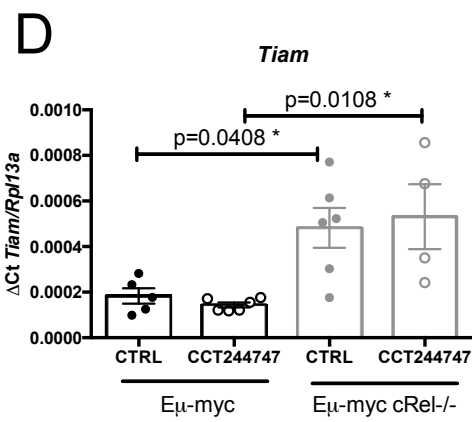



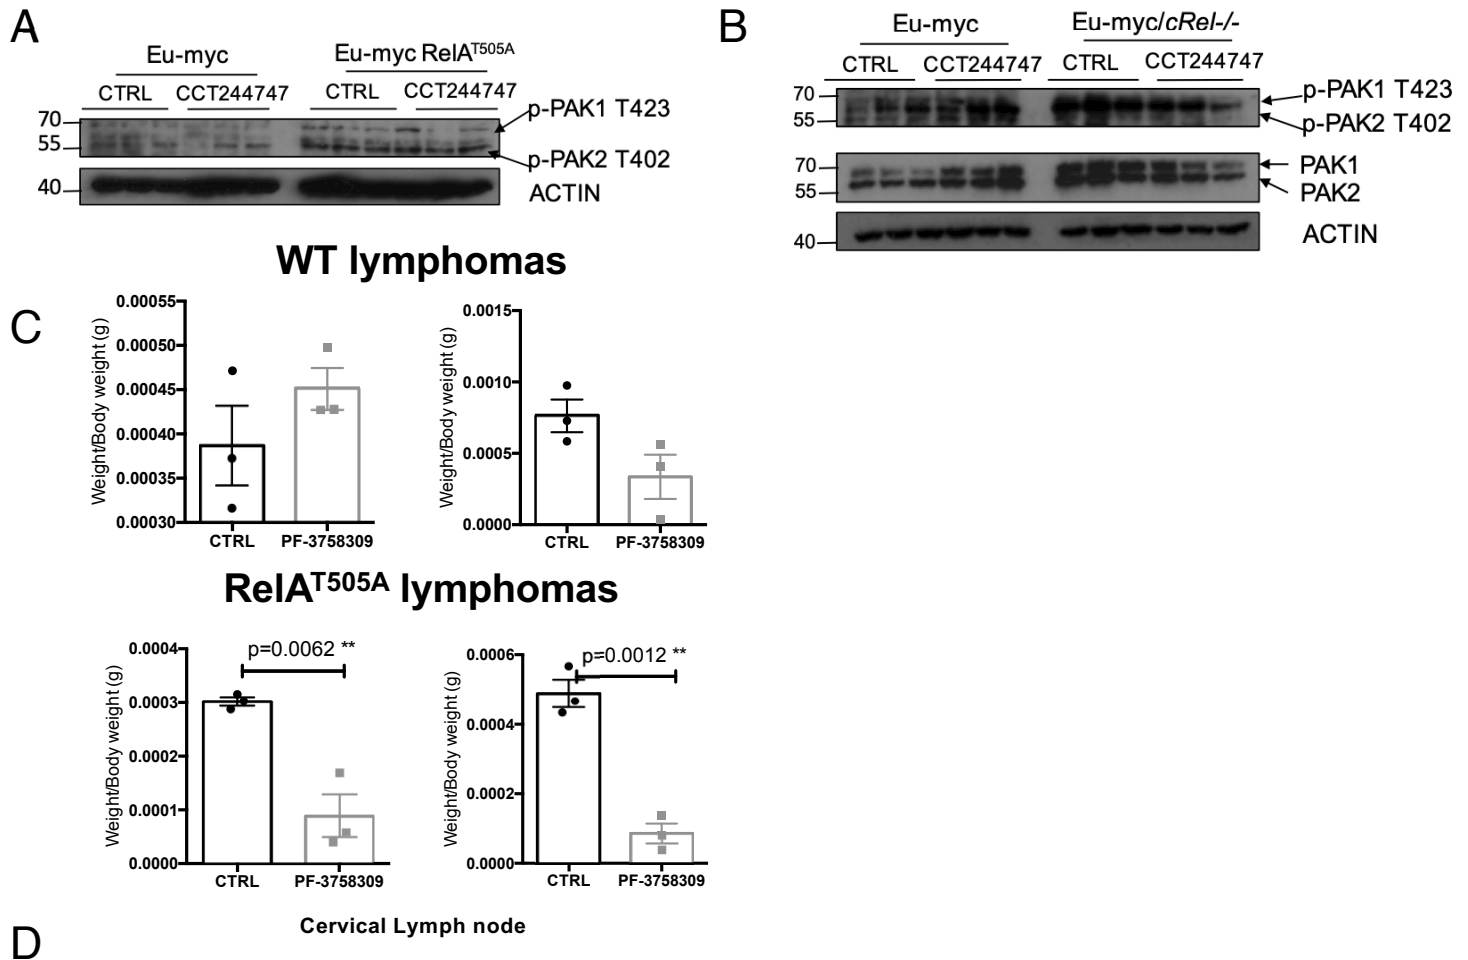

| Tumour                | Lymphoid organ weight/Bodyweight (mg) |                          |                      |                          |                      |                         |                      |                      |                       |                         |                      |                         |
|-----------------------|---------------------------------------|--------------------------|----------------------|--------------------------|----------------------|-------------------------|----------------------|----------------------|-----------------------|-------------------------|----------------------|-------------------------|
|                       | Inguinal LN                           |                          | Brachial LN          |                          | Mesenteric LN        |                         | Cervical LN          |                      | Spleen                |                         | Thymus               |                         |
|                       | Control                               | PF3758309                | Control              | PF3758309                | Control              | PF3758309               | Control              | PF3758309            | Control               | PF3758309               | Control              | PF3758309               |
| <b>Eu-myc 1</b>       | 0.65<br>0.54<br>0.39                  | 0.62<br>0.65<br>0.42     | 1.05<br>0.86<br>0.73 | 0.46<br>0.78<br>0.68     | 2.24<br>1.82<br>2.21 | 0.94<br>2.15<br>1.87    | 0.73<br>0.58<br>0.98 | 0.56<br>0.04<br>0.41 | 9.84<br>8.95<br>9.12  | 6.59<br>12.99<br>7.22   | 2.15<br>1.94<br>2.19 | 1.18<br>1.97<br>2.51    |
| <b>Eu-myc 2</b>       | 1.00<br>0.70<br>1.46                  | 0.58<br>0.57<br>0.78     | 1.20<br>1.11<br>0.75 | 0.55<br>0.77<br>0.63     | 2.50<br>2.78<br>2.33 | 2.07<br>2.83<br>1.68    | 0.67<br>0.63<br>0.41 | 0.37<br>0.36<br>0.62 | 7.32<br>8.41<br>10.62 | 7.72<br>8.47<br>7.52    | 1.28<br>1.79<br>4.51 | 1.68<br>1.26<br>1.84    |
| <b>Eu-myc 3</b>       | 0.92<br>0.88<br>1.48                  | 0.92<br>1.42<br>0.86     | 1.18<br>1.25<br>0.81 | 1.10<br>0.90<br>1.16     | 2.38<br>1.68<br>3.48 | 1.86<br>2.16<br>2.08    | 0.32<br>0.37<br>0.47 | 0.43<br>0.43<br>0.50 | 7.74<br>8.77<br>13.75 | 6.89<br>7.08<br>7.55    | 1.25<br>1.79<br>1.58 | 1.50<br>2.00<br>1.28    |
| <b>Eu-myc/T505A 1</b> | 0.93<br>0.48<br>1.14                  | 0.29 *<br>0.08<br>0.15   | 0.45<br>0.85<br>0.79 | 0.23 *<br>0.13<br>0.17   | 1.45<br>1.43<br>1.46 | 0.83 **<br>0.79<br>1.05 | 0.47<br>0.43<br>0.57 | 0.14<br>0.08<br>0.04 | 5.20<br>4.96<br>6.01  | 5.99 **<br>5.52<br>5.75 | 2.71<br>2.19<br>2.03 | 0.57 **<br>0.62<br>0.63 |
| <b>Eu-myc/T505A 2</b> | 0.75<br>0.38<br>0.88                  | 0.29 *<br>0.14<br>0.28   | 0.42<br>0.87<br>0.74 | 0.18<br>0.17<br>0.27     | 1.57<br>1.96<br>1.20 | 0.68<br>0.88<br>1.14    | 0.43<br>0.30<br>0.36 | 0.12<br>0.05<br>0.11 | 5.27<br>4.19<br>4.91  | 5.76 **<br>4.63<br>5.27 | 2.19<br>1.85<br>1.69 | 0.65 **<br>0.74<br>0.80 |
| <b>Eu-myc/T505A 3</b> | 0.91<br>0.73<br>0.77                  | 0.11 ***<br>0.06<br>0.18 | 0.60<br>0.62<br>0.56 | 0.16 ***<br>0.25<br>0.12 | 1.58<br>1.37<br>1.63 | 1.12 *<br>1.00<br>0.71  | 0.29<br>0.32<br>0.30 | 0.04<br>0.17<br>0.06 | 3.69<br>4.09<br>5.46  | 4.32 *<br>8.43<br>7.08  | 1.49<br>1.47<br>1.88 | 1.17 **<br>0.76<br>0.81 |
