# Supplementary material for: Up-regulation of the PI3K/AKT and RHO/RAC/PAK signalling pathways in CHK1 inhibitor resistant Eµ-Myc lymphoma cells
Source: Biochem J. 2022 Oct 14;479(19):2131–51. doi: 10.1042/BCJ20220103 (PMC9704644; doi:10.1042/BCJ20220103)
Supplement: Supplementary Material 3 [file BCJ-479-2131-s3.pdf]

## Sheet: Description
Analysis of upregulated phosphopeptides and phosphosites in Eμ-Myc Rel-/- lymphomas versus WT Eμ-Myc lymphomas
Tab 1: Data extracted from Supp data File 1 that includes just the phosphopeptides upregulated in Eμ-Myc Rel-/- lymphomas versus WT Eμ-Myc lymphomas (p-value <0.05)
Tab 2: Table that cross references the phosphosites upregulated in Eμ-Myc Rel-/- lymphomas versus WT Eμ-Myc lymphomas (p-value <0.05) with known AKT substrates listed by Cell Signalling Twechnology (CST) (https://www.cellsignal.co.uk/learn-and-support/reference-tables/pi3k-akt-substrates-table). Identical phosphosites are shade in blue. Other sites are where we fidn the same AKT target protein be…
Tab 3: Table of kinases and their phosphosites upregulated in Eμ-Myc Rel-/- lymphomas versus WT Eμ-Myc lymphomas (p-value <0.05)

## Sheet: Phospho cRel vs WT Upregulated
Order	Confidence	PSM Ambiguity	Sequence	Annotated Sequence	Modifications	Modifications all possible sites	Modifications in Master Proteins	Modifications in Master Proteins all Sites	Qvality PEP	Qvality q-value	SVM_Score	Number of Protein Groups	Number of Proteins	Number of PSMs	Master Protein Accessions	First Master Protein Accession	Master Protein Descriptions	GN	GN_phosphosite(s)	Sig change in any comparison?	Protein Accessions	Positions in Master Proteins	Number of Missed Cleavages	Theo MHplus in Da	Sequence Length	Number of Razor Quan Results	Abundance Ratio Control Eu-Myc Chk1i Eu-Myc	Abundance Ratio Control T505A Chk1i T505A	Abundance Ratio Control cRel Chk1i cRel	Abundance Ratio log2 Control Eu-Myc Chk1i Eu-Myc	Abundance Ratio log2 Control T505A Chk1i T505A	Abundance Ratio log2 Control cRel Chk1i cRel	Abundance Ratio P-Value Control Eu-Myc Chk1i Eu-Myc	Abundance Ratio P-Value Control T505A Chk1i T505A	Abundance Ratio P-Value Control cRel Chk1i cRel	Abundance Ratio Adj P-Value Control Eu-Myc Chk1i Eu-Myc	Abundance Ratio Adj P-Value Control T505A Chk1i T505A	Abundance Ratio Adj P-Value Control cRel Chk1i cRel	Abundance Ratio Variability in Percent Control Eu-Myc Chk1i Eu-Myc	Abundance Ratio Variability in Percent Control T505A Chk1i T505A	Abundance Ratio Variability in Percent Control cRel Chk1i cRel	Abundance Ratio Weight Control Eu-Myc Chk1i Eu-Myc	Abundance Ratio Weight Control T505A Chk1i T505A	Abundance Ratio Weight Control cRel Chk1i cRel	Abundance Ratios by Bio Rep Control Eu-MycRep1 Chk1i Eu-MycRep1	Abundance Ratios by Bio Rep Control Eu-MycRep2 Chk1i Eu-MycRep2	Abundance Ratios by Bio Rep Control Eu-MycRep3 Chk1i Eu-MycRep3	Abundance Ratios by Bio Rep Control Eu-MycRep4 Chk1i Eu-MycRep4	Abundance Ratios by Bio Rep Control Eu-MycRep5 Chk1i Eu-MycRep5
6048	High	Unambiguous	YKDIIRQPSEEEIIK	[K].YKDIIRQPSEEEIIK.[L]	2xTMT6plex [K2; K15]; 1xTMT6plex [N-Term]; 1xPhospho [S9(100)]	2xTMT6plex [K2; K15]; 1xTMT6plex [N-Term]; 1xPhospho [Y1(0); S9(100)]	Q62048 1xPhospho [S116(100)]	Q62048 1xPhospho [Y108(0); S116(100)]	0.0564438	0.00543118	0.324	1	1	4	Q62048	Q62048	Astrocytic phosphoprotein PEA-15 OS=Mus musculus OX=10090 GN=Pea15 PE=1 SV=1	Pea15	Pea15_S116	YES	Q62048	Q62048 [108-122]	2	2628.46	15	0	0.814	0.99	7.237	-0.3	-0.01	2.86	0.139174	0.993864	4.88e-15	0.660594	0.999874	4.58e-13	31.09	44.16	39.27	8.33985	4.03562	9.38262	0.03	1.072		0.814
705	High	Unambiguous	IEDVGSDEEDDSGKDKK	[K].IEDVGSDEEDDSGKDKK.[K]	3xTMT6plex [K14; K16; K17]; 1xTMT6plex [N-Term]; 1xPhospho [S6(99.4)]	3xTMT6plex [K14; K16; K17]; 1xTMT6plex [N-Term]; 1xPhospho [S6(99.4); S12(0.6)]	P11499 1xPhospho [S255(99.4)]	P11499 1xPhospho [S255(99.4); S261(0.6)]	8.1e-06	0	2.077	1	1	4	P11499	P11499	Heat shock protein HSP 90-beta OS=Mus musculus OX=10090 GN=Hsp90ab1 PE=1 SV=3	Hsp90ab1	Hsp90ab1_S255	YES	P11499	P11499 [250-266]	2	2862.44	17	0	0.601	0.81	1.008	-0.73	-0.3	0.01	0.000357851	0.145426	0.919711	0.00834365	0.734078	0.999462	10.77	11.23	30.24	9.23817	8.47492	10.4918	0.318		0.601		0.722
3722	High	Unambiguous	SLSDSESDDSKSK	[K].SLSDSESDDSKSK.[K]	2xTMT6plex [K11; K13]; 1xTMT6plex [N-Term]; 1xPhospho [S7(99.5)]	2xTMT6plex [K11; K13]; 1xTMT6plex [N-Term]; 1xPhospho [S1(0); S3(0); S5(0.5); S7(99.5); S10(0); S12(0)]	P23198 1xPhospho [S99(99.5)]	P23198 1xPhospho [S93(0); S95(0); S97(0.5); S99(99.5); S102(0); S104(0)]	0.00251978	0.000530845	0.921	1	1	3	P23198	P23198	Chromobox protein homolog 3 OS=Mus musculus OX=10090 GN=Cbx3 PE=1 SV=2	Cbx3	Cbx3_S95	YES	P23198	P23198 [93-105]	1	2152.06	13	0	0.636	1.15	0.672	-0.65	0.2	-0.57	0.00142844	0.283981	0.0623644	0.0261627	0.888792	0.369184	20.01	52.55	23.99	9.5411	7.04221	10.9189	0.106	0.848		0.636
3597	High	Unambiguous	TSEDTSSGSPPKK	[R].TSEDTSSGSPPKK.[S]	2xTMT6plex [K12; K13]; 1xTMT6plex [N-Term]; 1xPhospho [S9(99.9)]	2xTMT6plex [K12; K13]; 1xTMT6plex [N-Term]; 1xPhospho [T1(0); S2(0); T5(0); S6(0.1); S7(0.1); S9(99.9)]	O35841 1xPhospho [S464(99.9)]	O35841 1xPhospho [T456(0); S457(0); T460(0); S461(0.1); S462(0.1); S464(99.9)]	0.00179287	0.000530845	0.992	1	1	4	O35841	O35841	Apoptosis inhibitor 5 OS=Mus musculus OX=10090 GN=Api5 PE=1 SV=2	Api5	Api5_S464	YES	O35841	O35841 [456-468]	1	2088.08	13	0	1.004	1.049	1.545	0.01	0.07	0.63	0.970329	0.751884	0.0786978	0.99999	0.99264	0.42703	2.47	7.67	117.92	9.30766	8.55421	10.7655	0.65		1.02		1.004
4252	High	Unambiguous	LKATVTPSPVKGK	[R].LKATVTPSPVKGK.[A]	3xTMT6plex [K2; K11; K13]; 1xTMT6plex [N-Term]; 1xPhospho [T6(94.7)]	3xTMT6plex [K2; K11; K13]; 1xTMT6plex [N-Term]; 1xPhospho [T4(0); T6(94.7); S8(5.3)]	Q80XU3 1xPhospho [T179(94.7)]	Q80XU3 1xPhospho [T177(0); T179(94.7); S181(5.3)]	0.00532497	0.000818925	0.767	1	1	9	Q80XU3	Q80XU3	Nuclear ubiquitous casein and cyclin-dependent kinase substrate 1 OS=Mus musculus OX=10090 GN=Nucks1 PE=1 SV=1	Nucks1	Nucks1_T179	YES	Q80XU3	Q80XU3 [174-186]	2	2322.43	13	0	1.188	0.772	10.074	0.25	-0.37	3.33	0.263918	0.0523124	1e-17	0.838333	0.465153	1.15e-15	62.39	33.75	133.38	10.1573	7.30652	11.0549	0.043	1.688		1.188
2164	High	Unambiguous	DPNASPGDAGEQAIR	[R].DPNASPGDAGEQAIR.[Q]	1xTMT6plex [N-Term]; 1xPhospho [S5(100)]	1xTMT6plex [N-Term]; 1xPhospho [S5(100)]	Q64727 1xPhospho [S290(100)]	Q64727 1xPhospho [S290(100)]	2.64e-05	0	1.843	1	1	6	Q64727	Q64727	Vinculin OS=Mus musculus OX=10090 GN=Vcl PE=1 SV=4	Vcl	Vcl_S290	YES	Q64727	Q64727 [286-300]	0	1806.82	15	0	0.781	1.051	0.675	-0.36	0.07	-0.57	0.158874	0.697411	0.0875775	0.696424	0.99264	0.456568	9.66	1.88	61.14	7.79051	7.40769	9.43921	0.781		1.078		0.698
1657	High	Unambiguous	RSPLPGEPQRPK	[R].RSPLPGEPQRPK.[R]	1xTMT6plex [K12]; 1xTMT6plex [N-Term]; 1xPhospho [S2(100)]	1xTMT6plex [K12]; 1xTMT6plex [N-Term]; 1xPhospho [S2(100)]	O54786 1xPhospho [S314(100)]	O54786 1xPhospho [S314(100)]	0.00033675	0	1.336	1	1	7	O54786	O54786	DNA fragmentation factor subunit alpha OS=Mus musculus OX=10090 GN=Dffa PE=1 SV=2	Dffa	Dffa_S314	YES	O54786	O54786 [313-324]	1	1900.06	12	0	0.653	0.985	0.723	-0.61	-0.02	-0.47	0.00789032	0.996657	0.125005	0.09843	0.999874	0.567941	17.25	32.3	16.9	8.25125	6.69627	9.65267	0.371	0.653	0.475	0.725	0.935
284	High	Unambiguous	RAPSVANIGSHCDLSLK	[R].RAPSVANIGSHCDLSLK.[I]	1xCarbamidomethyl [C12]; 1xTMT6plex [K17]; 1xTMT6plex [N-Term]; 1xPhospho [S4(100)]	1xCarbamidomethyl [C12]; 1xTMT6plex [K17]; 1xTMT6plex [N-Term]; 1xPhospho [S4(100); S10(0); S15(0)]	Q8BTM8 1xPhospho [S2152(100)]	Q8BTM8 1xPhospho [S2152(100); S2158(0); S2163(0)]	0.000224999	0	1.417	1	1	4	Q8BTM8	Q8BTM8	Filamin-A OS=Mus musculus OX=10090 GN=Flna PE=1 SV=5	Flna	Flna_S2152	YES	Q8BTM8	Q8BTM8 [2149-2165]	1	2363.23	17	0	0.643	0.776	0.457	-0.64	-0.37	-1.13	0.00720106	0.153893	0.00060927	0.0913778	0.753496	0.00948988	12.11	6.24	18.76	7.92481	6.3733	9.52199	0.643		0.516		0.857
3377	High	Unambiguous	KSLSDSESDDSK	[R].KSLSDSESDDSK.[S]	2xTMT6plex [K1; K12]; 1xTMT6plex [N-Term]; 1xPhospho [S4(99.7)]	2xTMT6plex [K1; K12]; 1xTMT6plex [N-Term]; 1xPhospho [S2(0.3); S4(99.7); S6(0); S8(0); S11(0)]	P23198 1xPhospho [S95(99.7)]	P23198 1xPhospho [S93(0.3); S95(99.7); S97(0); S99(0); S102(0)]	0.00142409	0.000404169	1.04	1	1	5	P23198	P23198	Chromobox protein homolog 3 OS=Mus musculus OX=10090 GN=Cbx3 PE=1 SV=2	Cbx3	Cbx3_S95	YES	P23198	P23198 [92-103]	1	2065.03	12	0	0.628	1.137	0.699	-0.67	0.19	-0.52	0.00131371	0.364134	0.0905618	0.0245345	0.925418	0.468272	16.1	18.31	19.49	9.25	7.60572	10.5817	0.391	0.737	0.534		0.905
989	High	Unambiguous	TSEDTSSGSPPK	[R].TSEDTSSGSPPK.[K]	1xTMT6plex [K12]; 1xTMT6plex [N-Term]; 1xPhospho [S9(100)]	1xTMT6plex [K12]; 1xTMT6plex [N-Term]; 1xPhospho [T1(0); S2(0); T5(0); S6(0); S7(0); S9(100)]	O35841 1xPhospho [S464(100)]	O35841 1xPhospho [T456(0); S457(0); T460(0); S461(0); S462(0); S464(100)]	3.5e-05	0	1.787	1	1	6	O35841	O35841	Apoptosis inhibitor 5 OS=Mus musculus OX=10090 GN=Api5 PE=1 SV=2	Api5	Api5_S464	YES	O35841	O35841 [456-467]	0	1730.83	12	0	0.934	1.056	1.069	-0.1	0.08	0.1	0.722641	0.705602	0.895227	0.991034	0.99264	0.999275	13.78	9.38	79.48	7.3754	6.81006	9.01036	0.606	1.121	0.945		0.922
4099	High	Unambiguous	KRETDDEGEDD	[R].KRETDDEGEDD.[-]	1xTMT6plex [K1]; 1xTMT6plex [N-Term]; 1xPhospho [T4(100)]	1xTMT6plex [K1]; 1xTMT6plex [N-Term]; 1xPhospho [T4(100)]	Q9EST5 1xPhospho [T265(100)]	Q9EST5 1xPhospho [T265(100)]	0.00372335	0.000677187	0.84	1	1	24	Q9EST5	Q9EST5	Acidic leucine-rich nuclear phosphoprotein 32 family member B OS=Mus musculus OX=10090 GN=Anp32b PE=1 SV=1	Anp32b	Anp32b_T265	YES	Q9EST5	Q9EST5 [262-272]	2	1846.81	11	0	1.319	1.139	1.141	0.4	0.19	0.19	0.0655006	0.248211	0.659584	0.431642	0.853713	0.998116	6.03	33.11	21.57	11.3931	10.4554	13.0672	1.368	1.372	0.686	1.008	1.319
2300	High	Unambiguous	EGESLEDLMK	[R].EGESLEDLMK.[L]	1xTMT6plex [K10]; 1xTMT6plex [N-Term]; 1xPhospho [S4(100)]	1xTMT6plex [K10]; 1xTMT6plex [N-Term]; 1xPhospho [S4(100)]	Q61233 1xPhospho [S257(100)]	Q61233 1xPhospho [S257(100)]	2.14e-05	0	1.885	1	1	5	Q61233	Q61233	Plastin-2 OS=Mus musculus OX=10090 GN=Lcp1 PE=1 SV=4	Lcp1	Lcp1_S257	YES	Q61233	Q61233 [254-263]	0	1688.82	10	0	0.729	0.947	0.428	-0.46	-0.08	-1.23	0.0524131	0.7107	0.000196822	0.371981	0.99264	0.00353675	4.27	35.46	18.06	7.63044	6.83055	9.5015	0.671	0.775	0.697		0.763
1864	High	Unambiguous	SKPLDQSVEDLSK	[K].SKPLDQSVEDLSK.[A]	2xTMT6plex [K2; K13]; 1xTMT6plex [N-Term]; 1xPhospho [S7(99.8)]	2xTMT6plex [K2; K13]; 1xTMT6plex [N-Term]; 1xPhospho [S1(0); S7(99.8); S12(0.2)]	Q9JL26 1xPhospho [S184(99.8)]	Q9JL26 1xPhospho [S178(0); S184(99.8); S189(0.2)]	2.86e-05	0	1.827	1	1	6	Q9JL26	Q9JL26	Formin-like protein 1 OS=Mus musculus OX=10090 GN=Fmnl1 PE=1 SV=1	Fmnl1	Fmnl1_S184	YES	Q9JL26	Q9JL26 [178-190]	0	2213.2	13	0	0.753	0.872	0.881	-0.41	-0.2	-0.18	0.0431053	0.333301	0.492996	0.32929	0.911675	0.984677	12.57	7.09	13.39	8.93023	8.64211	10.6581	0.563	0.718	0.789		0.96
147	High	Unambiguous	IPEISIQDMTAQVTSPSGK	[K].IPEISIQDMTAQVTSPSGK.[T]	1xTMT6plex [K19]; 1xTMT6plex [N-Term]; 1xPhospho [S15(100)]	1xTMT6plex [K19]; 1xTMT6plex [N-Term]; 1xPhospho [S5(0); T10(0); T14(0); S15(100); S17(0)]	Q8BTM8 1xPhospho [S2180(100)]	Q8BTM8 1xPhospho [S2170(0); T2175(0); T2179(0); S2180(100); S2182(0)]	1.62e-07	0	2.852	1	1	3	Q8BTM8	Q8BTM8	Filamin-A OS=Mus musculus OX=10090 GN=Flna PE=1 SV=5	Flna	Flna_S2180	YES	Q8BTM8	Q8BTM8 [2166-2184]	0	2540.31	19	0	0.62	0.813	0.458	-0.69	-0.3	-1.13	0.00609441	0.322935	0.00475889	0.0801447	0.90606	0.0519717	17.13	8.6	9.22	7.0045	5.97957	8.14415	0.378		0.806		0.62
4093	High	Unambiguous	GQGASPVAMQK	[R].GQGASPVAMQK.[A]	1xOxidation [M9]; 1xTMT6plex [K11]; 1xTMT6plex [N-Term]; 1xPhospho [S5(100)]	1xOxidation [M9]; 1xTMT6plex [K11]; 1xTMT6plex [N-Term]; 1xPhospho [S5(100)]	Q64727 1xPhospho [S346(100)]	Q64727 1xPhospho [S346(100)]	0.0038709	0.000677187	0.832	1	1	5	Q64727	Q64727	Vinculin OS=Mus musculus OX=10090 GN=Vcl PE=1 SV=4	Vcl	Vcl_S346	YES	Q64727	Q64727 [342-352]	0	1627.83	11	0	0.91	1.236	0.774	-0.14	0.31	-0.37	0.531591	0.128788	0.211911	0.986329	0.698179	0.74466	2.28	36.56	43.96	8.76752	8.24508	10.5703	0.981		0.91		0.893
723	High	Unambiguous	IEDVGSDEEDDSGKDK	[K].IEDVGSDEEDDSGKDK.[K]	2xTMT6plex [K14; K16]; 1xTMT6plex [N-Term]; 1xPhospho [S6(100)]	2xTMT6plex [K14; K16]; 1xTMT6plex [N-Term]; 1xPhospho [S6(100); S12(0)]	P11499 1xPhospho [S255(100)]	P11499 1xPhospho [S255(100); S261(0)]	2.98e-06	0	2.275	1	1	12	P11499	P11499	Heat shock protein HSP 90-beta OS=Mus musculus OX=10090 GN=Hsp90ab1 PE=1 SV=3	Hsp90ab1	Hsp90ab1_S255	YES	P11499	P11499 [250-265]	1	2505.18	16	0	0.638	0.997	0.536	-0.65	0	-0.9	0.00149005	0.989022	0.00444678	0.0270307	0.999874	0.0492915	11.77	12.56	23.49	10.2138	9.89785	11.1151	0.496	0.638	0.762	0.611	0.901
1548	High	Unambiguous	SEKSVEAAAELSAK	[M].SEKSVEAAAELSAK.[D]	1xAcetyl [N-Term]; 2xTMT6plex [K3; K14]; 1xTMT6plex [N-Term]; 1xPhospho [S4(98.6)]	1xAcetyl [N-Term]; 2xTMT6plex [K3; K14]; 1xTMT6plex [N-Term]; 1xPhospho [S1(1.4); S4(98.6); S12(0)]	Q9D0J8 1xAcetyl [N-Term]; 1xPhospho [S5(98.6)]	Q9D0J8 1xAcetyl [N-Term]; 1xPhospho [S2(1.4); S5(98.6); S13(0)]	0.000384925	0	1.309	1	1	8	Q9D0J8	Q9D0J8	Parathymosin OS=Mus musculus OX=10090 GN=Ptms PE=1 SV=3	Ptms	Ptms_S5	YES	Q9D0J8	Q9D0J8 [2-15]	1	2229.2	14	0	0.768	1.149	1.934	-0.38	0.2	0.95	0.126179	0.358261	0.027623	0.626854	0.922977	0.208918	48.05	67.19	70.7	7.09698	6.37851	7.44708	0.052	1.19		0.768
5205	High	Unambiguous	VPAPPGSPCR	[K].VPAPPGSPCR.[Q]	1xCarbamidomethyl [C9]; 1xTMT6plex [N-Term]; 1xPhospho [S7(100)]	1xCarbamidomethyl [C9]; 1xTMT6plex [N-Term]; 1xPhospho [S7(100)]	Q60953 1xPhospho [S17(100)]	Q60953 1xPhospho [S17(100)]	0.0173478	0.0018007	0.539	1	1	8	Q60953	Q60953	Protein PML OS=Mus musculus OX=10090 GN=Pml PE=1 SV=3	Pml	Pml_S17	YES	Q60953	Q60953 [11-20]	0	1346.65	10	0	0.786	1.142	0.834	-0.35	0.19	-0.26	0.101088	0.280718	0.35687	0.556119	0.886107	0.923063	17.68	19.05	36.01	9.43519	8.32745	10.6571	0.411	0.808	0.764		1.067
3116	High	Unambiguous	SASPGLPKGEKEQQEAIEHIDEVQNEIDR	[K].SASPGLPKGEKEQQEAIEHIDEVQNEIDR.[L]	2xTMT6plex [K8; K11]; 1xTMT6plex [N-Term]; 1xPhospho [S3(83.4)]	2xTMT6plex [K8; K11]; 1xTMT6plex [N-Term]; 1xPhospho [S1(16.6); S3(83.4)]	Q9EQU5 1xPhospho [S30(83.4)]	Q9EQU5 1xPhospho [S28(16.6); S30(83.4)]	0.000854457	0.000209709	1.146	1	1	7	Q9EQU5	Q9EQU5	Protein SET OS=Mus musculus OX=10090 GN=Set PE=1 SV=1	Set	Set_S30	YES	Q9EQU5	Q9EQU5 [28-56]	2	4014.04	29	0	1.284	1.081	3.117	0.36	0.11	1.64	0.0699552	0.604105	4.63e-05	0.446456	0.985577	0.00101077	15.3	64.38	103.75	7.2891	6.00899	7.05637	0.041	1.417	0.882	1.284	1.31
4717	High	Unambiguous	SASPGLPKGEK	[K].SASPGLPKGEK.[E]	2xTMT6plex [K8; K11]; 1xTMT6plex [N-Term]; 1xPhospho [S3(99.8)]	2xTMT6plex [K8; K11]; 1xTMT6plex [N-Term]; 1xPhospho [S1(0.3); S3(99.8)]	Q9EQU5 1xPhospho [S30(99.8)]	Q9EQU5 1xPhospho [S28(0.3); S30(99.8)]	0.00624633	0.000907142	0.735	1	1	6	Q9EQU5	Q9EQU5	Protein SET OS=Mus musculus OX=10090 GN=Set PE=1 SV=1	Set	Set_S30	YES	Q9EQU5	Q9EQU5 [28-38]	1	1838.04	11	0	1.196	1.156	4.165	0.26	0.21	2.06	0.242852	0.278455	1.27e-09	0.821301	0.884982	6.01e-08	37.38	90.64	106.66	10.2646	9.17493	11.2557	0.061	1.498	0.669	1.271	1.196
2508	High	Unambiguous	AASPPASASDLIEQQQK	[R].AASPPASASDLIEQQQK.[R]	1xTMT6plex [K17]; 1xTMT6plex [N-Term]; 1xPhospho [S]	1xTMT6plex [K17]; 1xTMT6plex [N-Term]; 1xPhospho [S3(49.9); S7(49.9); S9(0.2)]	Q8C079 1xPhospho [S]	Q8C079 1xPhospho [S335(49.9); S339(49.9); S341(0.2)]	4.42e-06	0	2.197	1	1	5	Q8C079	Q8C079	Striatin-interacting protein 1 OS=Mus musculus OX=10090 GN=Strip1 PE=1 SV=2	Strip1	Strip1_S335	YES	Q8C079	Q8C079 [333-349]	0	2279.17	17	0	0.885	0.798	0.522	-0.18	-0.33	-0.94	0.637708	0.320897	0.00865259	0.98968	0.905061	0.0838882	0.79	9.63	28.54	5.44626	4.58496	7.27333	0.885		0.79		0.891
3467	High	Unambiguous	RPPSPDPNTK	[R].RPPSPDPNTK.[V]	1xTMT6plex [K10]; 1xTMT6plex [N-Term]; 1xPhospho [S4(100)]	1xTMT6plex [K10]; 1xTMT6plex [N-Term]; 1xPhospho [S4(100); T9(0)]	Q62261 1xPhospho [S2102(100)]	Q62261 1xPhospho [S2102(100); T2107(0)]	0.00139699	0.000404169	1.044	1	1	7	Q62261	Q62261	Spectrin beta chain; non-erythrocytic 1 OS=Mus musculus OX=10090 GN=Sptbn1 PE=1 SV=2	Sptbn1	Sptbn1_S2102	YES	Q62261	Q62261 [2099-2108]	0	1646.87	10	0	0.83	1.007	0.679	-0.27	0.01	-0.56	0.175385	0.928481	0.0693734	0.731548	0.997187	0.396174	10.99	13.04	32.26	10.275	9.50433	11.4983	0.467	0.874	0.788		0.965
531	High	Unambiguous	KGDVEGSQSQDEGEGSGESER	[K].KGDVEGSQSQDEGEGSGESER.[G]	1xTMT6plex [K1]; 1xTMT6plex [N-Term]; 1xPhospho [S9(99.9)]	1xTMT6plex [K1]; 1xTMT6plex [N-Term]; 1xPhospho [S7(0.1); S9(99.9); S16(0); S19(0)]	Q9CW03 1xPhospho [S1067(99.9)]	Q9CW03 1xPhospho [S1065(0.1); S1067(99.9); S1074(0); S1077(0)]	3.42e-06	0	2.248	1	1	6	Q9CW03	Q9CW03	Structural maintenance of chromosomes protein 3 OS=Mus musculus OX=10090 GN=Smc3 PE=1 SV=2	Smc3	Smc3_S1067	YES	Q9CW03	Q9CW03 [1059-1079]	1	2705.19	21	0	0.749	0.867	0.845	-0.42	-0.21	-0.24	0.0997821	0.491207	0.552327	0.553917	0.965376	0.996923	0.42	17.9	3.71	6.67666	5.80735	7.75355	0.745		0.766		0.749
745	High	Unambiguous	LLKEGEEPTVYSDDEEPKDETAR	[K].LLKEGEEPTVYSDDEEPKDETAR.[K]	2xTMT6plex [K3; K18]; 1xTMT6plex [N-Term]; 1xPhospho [S12(90.6)]	2xTMT6plex [K3; K18]; 1xTMT6plex [N-Term]; 1xPhospho [T9(0); Y11(9.4); S12(90.6); T21(0)]	O55022 1xPhospho [S181(90.6)]	O55022 1xPhospho [T178(0); Y180(9.4); S181(90.6); T190(0)]	0.000605041	0	1.217	1	1	10	O55022	O55022	Membrane-associated progesterone receptor component 1 OS=Mus musculus OX=10090 GN=Pgrmc1 PE=1 SV=4	Pgrmc1	Pgrmc1_S181	YES	O55022	O55022 [170-192]	2	3417.69	23	0	0.947	1.064	0.824	-0.08	0.09	-0.28	0.769165	0.686293	0.328947	0.998535	0.99264	0.902731	12.8	34.92	22.06	9.40599	8.03452	10.3166	0.095	1.038	0.985	0.774	0.947
724	High	Unambiguous	IEDVGSDEEDDSGK	[K].IEDVGSDEEDDSGK.[D]	1xTMT6plex [K14]; 1xTMT6plex [N-Term]; 1xPhospho [S6(100)]	1xTMT6plex [K14]; 1xTMT6plex [N-Term]; 1xPhospho [S6(100); S12(0)]	P11499 1xPhospho [S255(100)]	P11499 1xPhospho [S255(100); S261(0)]	6.59e-07	0	2.574	1	1	13	P11499	P11499	Heat shock protein HSP 90-beta OS=Mus musculus OX=10090 GN=Hsp90ab1 PE=1 SV=3	Hsp90ab1	Hsp90ab1_S255	YES	P11499	P11499 [250-263]	0	2032.9	14	0	0.819	0.991	0.566	-0.29	-0.01	-0.82	0.181234	0.963736	0.00901917	0.738638	0.998927	0.0868881	12.2	45.1	28.74	9.82516	9.10341	11.1967	0.921	0.72	0.729		0.935
2935	High	Unambiguous	FIDKDQQPSGSEGEDDDAEAALKK	[K].FIDKDQQPSGSEGEDDDAEAALKK.[E]	3xTMT6plex [K4; K23; K24]; 1xTMT6plex [N-Term]; 2xPhospho [S9(100); S11(100)]	3xTMT6plex [K4; K23; K24]; 1xTMT6plex [N-Term]; 2xPhospho [S9(100); S11(100)]	Q99J36 2xPhospho [S86(100); S88(100)]	Q99J36 2xPhospho [S86(100); S88(100)]	2.41e-06	0	2.317	1	1	5	Q99J36	Q99J36	THUMP domain-containing protein 1 OS=Mus musculus OX=10090 GN=Thumpd1 PE=1 SV=1	Thumpd1	Thumpd1_S86;S88	YES	Q99J36	Q99J36 [78-101]	2	3669.77	24	0	0.719	1.172	0.694	-0.48	0.23	-0.53	0.0515676	0.211178	0.121499	0.369678	0.819251	0.559343	4.59	22.76	16.61	7.90093	7.43197	9.20452	0.441	0.738	0.7	0.785
5492	High	Unambiguous	NVSGSLK	[K].NVSGSLK.[N]	1xTMT6plex [K7]; 1xTMT6plex [N-Term]; 1xPhospho [S5(99.7)]	1xTMT6plex [K7]; 1xTMT6plex [N-Term]; 1xPhospho [S3(0.3); S5(99.7)]	Q9JI11 1xPhospho [S418(99.7)]	Q9JI11 1xPhospho [S416(0.3); S418(99.7)]	0.0245003	0.00264733	0.475	1	1	4	Q9JI11	Q9JI11	Serine/threonine-protein kinase 4 OS=Mus musculus OX=10090 GN=Stk4 PE=1 SV=1	Stk4	Stk4_S418	YES	Q9JI11	Q9JI11 [414-420]	0	1242.69	7	0	0.54	0.799	0.659	-0.89	-0.32	-0.6	1.49e-05	0.0875997	0.0515749	0.000573677	0.602038	0.328451	1.75	14.15	25.48	10.3206	9.56065	11.0714	0.452	0.55	0.529		0.573
507	High	Unambiguous	KLDPAQSASRENLLEEQGSIALR	[K].KLDPAQSASRENLLEEQGSIALR.[Q]	1xTMT6plex [K1]; 1xTMT6plex [N-Term]; 1xPhospho [S7(99.1)]	1xTMT6plex [K1]; 1xTMT6plex [N-Term]; 1xPhospho [S7(99.1); S9(0.9); S19(0)]	P16546 1xPhospho [S1029(99.1)]	P16546 1xPhospho [S1029(99.1); S1031(0.9); S1041(0)]	2.11e-07	0	2.8	1	1	6	P16546	P16546	Spectrin alpha chain; non-erythrocytic 1 OS=Mus musculus OX=10090 GN=Sptan1 PE=1 SV=4	Sptan1	Sptan1_S1029	YES	P16546	P16546 [1023-1045]	2	3063.62	23	0	0.881	0.816	0.909	-0.18	-0.29	-0.14	0.426189	0.156513	0.590073	0.959422	0.753496	0.996923	10.75	14.59	31.28	8.27282	7.14988	9.29492	0.466	0.81		0.959	0.968
178	High	Unambiguous	IYHLPDAESDEDEDFKEQTR	[K].IYHLPDAESDEDEDFKEQTR.[L]	1xTMT6plex [K16]; 1xTMT6plex [N-Term]; 1xPhospho [S9(100)]	1xTMT6plex [K16]; 1xTMT6plex [N-Term]; 1xPhospho [Y2(0); S9(100); T19(0)]	P42208 1xPhospho [S218(100)]	P42208 1xPhospho [Y211(0); S218(100); T228(0)]	0.000195604	0	1.445	1	1	7	P42208	P42208	Septin-2 OS=Mus musculus OX=10090 GN=Sept2 PE=1 SV=2	Sept2	Sept2_S218	YES	P42208	P42208 [210-229]	1	2975.37	20	0	0.654	0.822	0.522	-0.61	-0.28	-0.94	0.0120625	0.143875	0.00743137	0.135832	0.731134	0.0738377	4.21	3.19	15.78	7.85474	7.39194	9.46808	0.62		0.689	0.602	0.927
501	High	Unambiguous	KAEGATLSNATGAVESTSQAGDRGSVSSYDR	[K].KAEGATLSNATGAVESTSQAGDRGSVSSYDR.[G]	1xTMT6plex [K1]; 1xTMT6plex [N-Term]; 2xPhospho [S27(53.6); S28(92.4)]	1xTMT6plex [K1]; 1xTMT6plex [N-Term]; 2xPhospho [T6(0); S8(0); T11(0); S16(0); T17(0); S18(0); S25(0.5); S27(53.6); S28(92.4); Y29(53.5)]	Q61644 2xPhospho [S345(53.6); S346(92.4)]	Q61644 2xPhospho [T324(0); S326(0); T329(0); S334(0); T335(0); S336(0); S343(0.5); S345(53.6); S346(92.4); Y347(53.5)]	2.13e-05	0	1.886	1	1	8	Q61644	Q61644	Protein kinase C and casein kinase substrate in neurons protein 1 OS=Mus musculus OX=10090 GN=Pacsin1 PE=1 SV=1	Pacsin1	Pacsin1_S346;[S345/Y347]	YES	Q61644	Q61644 [319-349]	2	3690.7	31	0	0.959	1.026	0.403	-0.06	0.04	-1.31	0.807936	0.753615	7.14e-05	0.998955	0.99264	0.00147886	33.85	33.66	0.54	8.71253	7.43463	9.74062	0.959		0.696		1.197
4247	High	Unambiguous	KSLSDSESDDSK	[R].KSLSDSESDDSK.[S]	2xTMT6plex [K1; K12]; 1xTMT6plex [N-Term]; 2xPhospho [S4(99.5); S6(99.6)]	2xTMT6plex [K1; K12]; 1xTMT6plex [N-Term]; 2xPhospho [S2(0.4); S4(99.5); S6(99.6); S8(0.5); S11(0)]	P23198 2xPhospho [S95(99.5); S97(99.6)]	P23198 2xPhospho [S93(0.4); S95(99.5); S97(99.6); S99(0.5); S102(0)]	0.00514358	0.000818925	0.774	1	1	5	P23198	P23198	Chromobox protein homolog 3 OS=Mus musculus OX=10090 GN=Cbx3 PE=1 SV=2	Cbx3	Cbx3_[S95/S97/S99];S95	YES	P23198	P23198 [92-103]	1	2145	12	0	0.679	1.055	0.717	-0.56	0.08	-0.48	0.00797791	0.725883	0.113907	0.0989235	0.99264	0.538438	9.7	15.19	9.4	9.13006	7.80219	10.2491	0.342	0.775	0.62	0.679	1.006
1849	High	Unambiguous	SSDSGLPSDIPHVR	[R].SSDSGLPSDIPHVR.[L]	1xTMT6plex [N-Term]; 1xPhospho [S]	1xTMT6plex [N-Term]; 1xPhospho [S1(50); S2(50); S4(0.1); S8(0)]	Q8K558 1xPhospho [S]	Q8K558 1xPhospho [S228(50); S229(50); S231(0.1); S235(0)]	6.39e-06	0	2.124	1	1	19	Q8K558	Q8K558	Trem-like transcript 1 protein OS=Mus musculus OX=10090 GN=Treml1 PE=1 SV=2	Treml1	Treml1_[S228/S229]	YES	Q8K558	Q8K558 [228-241]	0	1775.85	14	0	0.633	0.973	0.657	-0.66	-0.04	-0.61	0.00573961	0.908882	0.0959464	0.0770791	0.997187	0.48761	4.17	9.25	12.86	7.09064	5.56071	8.18239	0.511	1.194	0.589	0.633	0.655
446	High	Unambiguous	KDEDSDDESQSSHGGK	[R].KDEDSDDESQSSHGGK.[K]	2xTMT6plex [K1; K16]; 1xTMT6plex [N-Term]; 1xPhospho [S5(100)]	2xTMT6plex [K1; K16]; 1xTMT6plex [N-Term]; 1xPhospho [S5(100); S9(0); S11(0); S12(0)]	Q8CCJ3 1xPhospho [S458(100)]	Q8CCJ3 1xPhospho [S458(100); S462(0); S464(0); S465(0)]	4.45e-07	0	2.652	1	1	6	Q8CCJ3	Q8CCJ3	E3 UFM1-protein ligase 1 OS=Mus musculus OX=10090 GN=Ufl1 PE=1 SV=2	Ufl1	Ufl1_S458	YES	Q8CCJ3	Q8CCJ3 [454-469]	1	2488.14	16	0	0.931	0.813	0.677	-0.1	-0.3	-0.56	0.614357	0.133783	0.06754	0.98968	0.710136	0.387382	0.85	4.22	36.88	8.64566	8.38759	10.1891	0.629		0.931		0.937
2735	High	Unambiguous	AQTLPTSVVTITSESSPGKR	[R].AQTLPTSVVTITSESSPGKR.[E]	1xTMT6plex [K19]; 1xTMT6plex [N-Term]; 1xPhospho [S16(99.5)]	1xTMT6plex [K19]; 1xTMT6plex [N-Term]; 1xPhospho [T3(0); T6(0); S7(0); T10(0); T12(0); S13(0); S15(0.5); S16(99.5)]	Q62261 1xPhospho [S2340(99.5)]	Q62261 1xPhospho [T2327(0); T2330(0); S2331(0); T2334(0); T2336(0); S2337(0); S2339(0.5); S2340(99.5)]	9.25e-08	0	2.963	1	1	7	Q62261	Q62261	Spectrin beta chain; non-erythrocytic 1 OS=Mus musculus OX=10090 GN=Sptbn1 PE=1 SV=2	Sptbn1	Sptbn1_S2340	YES	Q62261	Q62261 [2325-2344]	1	2597.4	20	0	0.877	1.078	1.22	-0.19	0.11	0.29	0.458428	0.561033	0.585148	0.972882	0.982767	0.996923	17.05	3.98	13.59	8.06178	6.57894	8.83257	0.513	0.877	0.772	1.008	1.017
2182	High	Unambiguous	ESLKEEDESDDDNM	[K].ESLKEEDESDDDNM.[-]	1xOxidation [M14]; 1xTMT6plex [K4]; 1xTMT6plex [N-Term]; 1xPhospho [S9(100)]	1xOxidation [M14]; 1xTMT6plex [K4]; 1xTMT6plex [N-Term]; 1xPhospho [S2(0); S9(100)]	O70435 1xPhospho [S250(100)]	O70435 1xPhospho [S243(0); S250(100)]	4.72e-06	0	2.184	1	1	18	O70435	O70435	Proteasome subunit alpha type-3 OS=Mus musculus OX=10090 GN=Psma3 PE=1 SV=3	Psma3	Psma3_S250	YES	O70435	O70435 [242-255]	1	2209.91	14	0	0.716	0.66	0.661	-0.48	-0.6	-0.6	0.0286607	0.00292768	0.0528753	0.250834	0.0716389	0.334921	8.28	16.84	23.76	9.85409	8.98499	11.087	0.794	0.716	0.634	0.689	0.839
4150	High	Unambiguous	ATSPPHLDGTSNPESTVPEKK	[K].ATSPPHLDGTSNPESTVPEKK.[I]	2xTMT6plex [K20; K21]; 1xTMT6plex [N-Term]; 2xPhospho [S3(91.4); S11(99.1)]	2xTMT6plex [K20; K21]; 1xTMT6plex [N-Term]; 2xPhospho [T2(8.6); S3(91.4); T10(0.9); S11(99.1); S15(0); T16(0)]	Q60953 2xPhospho [S528(91.4); S536(99.1)]	Q60953 2xPhospho [T527(8.6); S528(91.4); T535(0.9); S536(99.1); S540(0); T541(0)]	0.0038709	0.000677187	0.832	1	1	12	Q60953	Q60953	Protein PML OS=Mus musculus OX=10090 GN=Pml PE=1 SV=3	Pml	Pml_S536;S528	YES	Q60953	Q60953 [526-546]	1	3039.5	21	0	0.814	0.92	0.774	-0.3	-0.12	-0.37	0.148703	0.676623	0.212708	0.679062	0.99264	0.745068	13.61	18.92	30.6	8.58646	7.56288	9.62417	0.61	0.835	0.793		1.046
1873	High	Unambiguous	SIEVENDFLPVEK	[R].SIEVENDFLPVEK.[T]	1xTMT6plex [K13]; 1xTMT6plex [N-Term]; 1xPhospho [S1(100)]	1xTMT6plex [K13]; 1xTMT6plex [N-Term]; 1xPhospho [S1(100)]	Q8R550 1xPhospho [S274(100)]	Q8R550 1xPhospho [S274(100)]	8.97e-08	0	2.969	1	1	10	Q8R550	Q8R550	SH3 domain-containing kinase-binding protein 1 OS=Mus musculus OX=10090 GN=Sh3kbp1 PE=1 SV=1	Sh3kbp1	Sh3kbp1_S274	YES	Q8R550	Q8R550 [274-286]	0	2057.06	13	0	0.567	1.232	0.76	-0.82	0.3	-0.4	5.7e-05	0.161997	0.184349	0.00179416	0.759618	0.69881	7.64	30.69	54.29	9.54959	8.21723	10.4417	0.567	0.513	0.476	0.785	0.845
2479	High	Unambiguous	AASENSQDAFR	[R].AASENSQDAFR.[V]	1xTMT6plex [N-Term]; 1xPhospho [S6(100)]	1xTMT6plex [N-Term]; 1xPhospho [S3(0); S6(100)]	Q03267 1xPhospho [S440(100)]	Q03267 1xPhospho [S437(0); S440(100)]	1.88e-05	0	1.91	1	1	9	Q03267	Q03267	DNA-binding protein Ikaros OS=Mus musculus OX=10090 GN=Ikzf1 PE=1 SV=2	Ikzf1	Ikzf1_S440	YES	Q03267	Q03267 [435-445]	0	1504.66	11	0	0.5	0.853	0.829	-1	-0.23	-0.27	1.31e-06	0.25021	0.343689	6.41e-05	0.85438	0.91523	5.63	17.4	14.06	9.96838	9.45033	10.5572	0.391	0.543	0.461		0.877
599	High	Unambiguous	GSTQDLFQVGLAPPGNAK	[R].GSTQDLFQVGLAPPGNAK.[D]	1xTMT6plex [K18]; 1xTMT6plex [N-Term]; 1xPhospho [S2(95.4)]	1xTMT6plex [K18]; 1xTMT6plex [N-Term]; 1xPhospho [S2(95.4); T3(4.6)]	Q80VH0 1xPhospho [S11(95.4)]	Q80VH0 1xPhospho [S11(95.4); T12(4.6)]	5.68e-05	0	1.691	1	1	8	Q80VH0	Q80VH0	B-cell scaffold protein with ankyrin repeats OS=Mus musculus OX=10090 GN=Bank1 PE=1 SV=3	Bank1	Bank1_S11	NO	Q80VH0	Q80VH0 [10-27]	0	2338.22	18	0	1.088	1.287	0.729	0.12	0.36	-0.46	0.527341	0.135079	0.241192	0.983958	0.711037	0.797086	6.77	3.83	71.34	6.17193	6.08958	8.01792	0.83		1.088		1.137
3010	High	Unambiguous	DEILPTTPISEQK	[K].DEILPTTPISEQK.[G]	1xTMT6plex [K13]; 1xTMT6plex [N-Term]; 1xPhospho [T7(99.8)]	1xTMT6plex [K13]; 1xTMT6plex [N-Term]; 1xPhospho [T6(0.2); T7(99.8); S10(0)]	P62908 1xPhospho [T221(99.8)]	P62908 1xPhospho [T220(0.2); T221(99.8); S224(0)]	0.000950371	0.000209709	1.124	1	1	4	P62908	P62908	40S ribosomal protein S3 OS=Mus musculus OX=10090 GN=Rps3 PE=1 SV=1	Rps3	Rps3_T221	YES	P62908	P62908 [215-227]	0	2009.06	13	0	0.844	0.708	1.176	-0.25	-0.5	0.23	0.326529	0.0464458	0.560739	0.89884	0.435005	0.996923	27.23	23.77	5.49	7.48784	6.54071	7.84361	0.626		1.09		0.844
146	High	Unambiguous	IPEISIQDMTAQVTSPSGK	[K].IPEISIQDMTAQVTSPSGK.[T]	1xOxidation [M9]; 1xTMT6plex [K19]; 1xTMT6plex [N-Term]; 1xPhospho [S/T]	1xOxidation [M9]; 1xTMT6plex [K19]; 1xTMT6plex [N-Term]; 1xPhospho [S5(0); T10(0); T14(0.3); S15(49.9); S17(49.9)]	Q8BTM8 1xPhospho [S/T]	Q8BTM8 1xPhospho [S2170(0); T2175(0); T2179(0.3); S2180(49.9); S2182(49.9)]	1.18e-05	0	2.003	1	1	6	Q8BTM8	Q8BTM8	Filamin-A OS=Mus musculus OX=10090 GN=Flna PE=1 SV=5	Flna	Flna_S2180	YES	Q8BTM8	Q8BTM8 [2166-2184]	0	2556.3	19	0	0.733	0.763	0.43	-0.45	-0.39	-1.22	0.0768781	0.17362	0.00126209	0.473926	0.779486	0.0179984	20.85	11.65	6.01	6.8716	6.13545	7.8857	0.515		0.925		0.733
396	High	Unambiguous	QLEEGQKGQEETSGAPDLSPER	[K].QLEEGQKGQEETSGAPDLSPER.[V]	1xTMT6plex [K7]; 1xTMT6plex [N-Term]; 1xPhospho [S19(99.9)]	1xTMT6plex [K7]; 1xTMT6plex [N-Term]; 1xPhospho [T12(0.1); S13(0); S19(99.9)]	Q8VBT6 1xPhospho [S484(99.9)]	Q8VBT6 1xPhospho [T477(0.1); S478(0); S484(99.9)]	0.000444165	0	1.28	1	1	4	Q8VBT6	Q8VBT6	Apolipoprotein B receptor OS=Mus musculus OX=10090 GN=Apobr PE=1 SV=1	Apobr	Apobr_S484	YES	Q8VBT6	Q8VBT6 [466-487]	1	2923.41	22	0	0.877	1.085	1.468	-0.19	0.12	0.55	0.460456	0.505275	0.210239	0.972882	0.967904	0.74466	20.65	35.45	64.67	8.15988	7.41746	9.02541	0.241	1.11	0.961	0.8
2360	High	Unambiguous	AGLEDSEEDVEEAEVEAEDKDH	[R].AGLEDSEEDVEEAEVEAEDKDH.[-]	1xTMT6plex [K20]; 1xTMT6plex [N-Term]; 1xPhospho [S6(100)]	1xTMT6plex [K20]; 1xTMT6plex [N-Term]; 1xPhospho [S6(100)]	A2AQ07 1xPhospho [S435(100)]	A2AQ07 1xPhospho [S435(100)]	3.63e-08	0	3.148	1	1	17	A2AQ07	A2AQ07	Tubulin beta-1 chain OS=Mus musculus OX=10090 GN=Tubb1 PE=1 SV=1	Tubb1	Tubb1_S435	YES	A2AQ07	A2AQ07 [430-451]	1	2983.3	22	0	0.908	1.151	0.599	-0.14	0.2	-0.74	0.488252	0.284695	0.0181938	0.979638	0.888792	0.152977	10.49	25.58	11.2	8.61728	7.40939	10.0326	0.813	0.908	0.986	0.732	0.934
816	High	Unambiguous	KSSFSNSADDIK	[R].KSSFSNSADDIK.[S]	2xTMT6plex [K1; K12]; 1xTMT6plex [N-Term]; 1xPhospho [S3(95.7)]	2xTMT6plex [K1; K12]; 1xTMT6plex [N-Term]; 1xPhospho [S2(4.3); S3(95.7); S5(0); S7(0)]	Q61686 1xPhospho [S93(95.7)]	Q61686 1xPhospho [S92(4.3); S93(95.7); S95(0); S97(0)]	3.2e-05	0	1.805	1	1	3	Q61686	Q61686	Chromobox protein homolog 5 OS=Mus musculus OX=10090 GN=Cbx5 PE=1 SV=1	Cbx5	Cbx5_S93	YES	Q61686	Q61686 [91-102]	1	2066.08	12	0	0.706	1.253	1.002	-0.5	0.33	0	0.0153346	0.0887307	0.899518	0.161887	0.604637	0.999275	9.81	62.94	1.44	9.71853	8.84612	10.7064	0.305	0.8		0.706
5733	High	Unambiguous	QLTQPETSYGR	[K].QLTQPETSYGR.[E]	1xTMT6plex [N-Term]; 1xPhospho [T3(100)]	1xTMT6plex [N-Term]; 1xPhospho [T3(100); T7(0); S8(0); Y9(0)]	Q62418 1xPhospho [T299(100)]	Q62418 1xPhospho [T299(100); T303(0); S304(0); Y305(0)]	0.0341572	0.00382861	0.414	1	1	4	Q62418	Q62418	Drebrin-like protein OS=Mus musculus OX=10090 GN=Dbnl PE=1 SV=2	Dbnl	Dbnl_T299	YES	Q62418	Q62418 [297-307]	0	1588.76	11	0	0.575	1.326	0.486	-0.8	0.41	-1.04	0.000144241	0.0374286	0.00144635	0.00389315	0.386017	0.0200981	3.28	43.47	12.06	8.53294	7.27519	9.49446	0.536	0.7	0.575
4225	High	Unambiguous	RKPSNASDKEPTQK	[R].RKPSNASDKEPTQK.[K]	3xTMT6plex [K2; K9; K14]; 1xTMT6plex [N-Term]; 1xPhospho [S4(99.9)]	3xTMT6plex [K2; K9; K14]; 1xTMT6plex [N-Term]; 1xPhospho [S4(99.9); S7(0.2); T12(0)]	Q8K352 1xPhospho [S7(99.9)]	Q8K352 1xPhospho [S7(99.9); S10(0.2); T15(0)]	0.00424648	0.000677187	0.813	1	1	3	Q8K352	Q8K352	SAM and SH3 domain-containing protein 3 OS=Mus musculus OX=10090 GN=Sash3 PE=1 SV=2	Sash3	Sash3_S7	YES	Q8K352	Q8K352 [4-17]	2	2582.45	14	0	0.522	0.981	0.832	-0.94	-0.03	-0.27	4.87e-06	0.951906	0.358619	0.000210424	0.997227	0.924604	5.34	9.3	36.03	9.59935	8.33718	9.98641	0.522		0.453		0.903
1685	High	Unambiguous	RPPSQSLTSSSLSSPDIFDSPSPEEDKEEHISLAHR	[R].RPPSQSLTSSSLSSPDIFDSPSPEEDKEEHISLAHR.[G]	1xTMT6plex [K27]; 1xTMT6plex [N-Term]; 2xPhospho [S20(100); S22(100)]	1xTMT6plex [K27]; 1xTMT6plex [N-Term]; 2xPhospho [S4(0); S6(0); T8(0); S9(0); S10(0); S11(0); S13(0); S14(0); S20(100); S22(100); S32(0.1)]	Q8R550 2xPhospho [S553(100); S555(100)]	Q8R550 2xPhospho [S537(0); S539(0); T541(0); S542(0); S543(0); S544(0); S546(0); S547(0); S553(100); S555(100); S565(0.1)]	0.00038875	0	1.307	1	1	5	Q8R550	Q8R550	SH3 domain-containing kinase-binding protein 1 OS=Mus musculus OX=10090 GN=Sh3kbp1 PE=1 SV=1	Sh3kbp1	Sh3kbp1_S553;S555	YES	Q8R550	Q8R550 [534-569]	1	4581.16	36	0	0.794	0.978	0.65	-0.33	-0.03	-0.62	0.201925	0.895195	0.127864	0.77337	0.997038	0.573616	7.33	17.14	10.5	6.57621	5.24231	7.61865	0.716	1.102	0.749		0.841
3264	High	Unambiguous	LGASNSPGQPNSVK	[K].LGASNSPGQPNSVK.[R]	1xTMT6plex [K14]; 1xTMT6plex [N-Term]; 1xPhospho [S6(94.9)]	1xTMT6plex [K14]; 1xTMT6plex [N-Term]; 1xPhospho [S4(5.1); S6(94.9); S12(0)]	B2RY56 1xPhospho [S672(94.9)]	B2RY56 1xPhospho [S670(5.1); S672(94.9); S678(0)]	0.00105174	0.000209709	1.103	1	1	7	B2RY56	B2RY56	RNA-binding protein 25 OS=Mus musculus OX=10090 GN=Rbm25 PE=1 SV=2	Rbm25	Rbm25_S672	YES	B2RY56	B2RY56 [667-680]	0	1893.98	14	0	0.797	1.073	0.783	-0.33	0.1	-0.35	0.104889	0.618133	0.227935	0.566565	0.991801	0.770394	5.79	34.09	33.43	8.66752	7.65287	9.54266	0.715	0.78	0.813		1.099
3589	High	Unambiguous	TSSLVGPTQSFFMR	[R].TSSLVGPTQSFFMR.[E]	1xTMT6plex [N-Term]; 1xPhospho [S3(98.4)]	1xTMT6plex [N-Term]; 1xPhospho [T1(0.1); S2(1.2); S3(98.4); T8(0.1); S10(0.1)]	P19437 1xPhospho [S29(98.4)]	P19437 1xPhospho [T27(0.1); S28(1.2); S29(98.4); T34(0.1); S36(0.1)]	0.00180149	0.000530845	0.991	1	1	4	P19437	P19437	B-lymphocyte antigen CD20 OS=Mus musculus OX=10090 GN=Ms4a1 PE=1 SV=1	Ms4a1	Ms4a1_S29	YES	P19437	P19437 [27-40]	0	1866.9	14	0	0.731	1.079	0.351	-0.45	0.11	-1.51	0.0477231	0.5872	7.23e-05	0.352385	0.983139	0.00149367	0.77	73.25	4.42	7.45615	6.4363	8.73166	0.724		0.731		1.01
4424	High	Unambiguous	SESGSKSSQPLASK	[M].SESGSKSSQPLASK.[Q]	1xAcetyl [N-Term]; 2xTMT6plex [K6; K14]; 1xTMT6plex [N-Term]; 2xPhospho [S1(92.6); S3(92.6)]	1xAcetyl [N-Term]; 2xTMT6plex [K6; K14]; 1xTMT6plex [N-Term]; 2xPhospho [S1(92.6); S3(92.6); S5(14.8); S7(0); S8(0); S13(0)]	P17095 1xAcetyl [N-Term]; 2xPhospho [S2(92.6); S4(92.6)]	P17095 1xAcetyl [N-Term]; 2xPhospho [S2(92.6); S4(92.6); S6(14.8); S8(0); S9(0); S14(0)]	0.0056803	0.000907142	0.754	1	1	7	P17095	P17095	High mobility group protein HMG-I/HMG-Y OS=Mus musculus OX=10090 GN=Hmga1 PE=1 SV=4	Hmga1	Hmga1_S2;S4	YES	P17095	P17095 [2-15]	1	2282.13	14	0	0.806	0.945	0.855	-0.31	-0.08	-0.23	0.215465	0.658229	0.506094	0.791809	0.99264	0.986318	9.54	6.59	16.57	8.12482	7.32427	8.92195		0.926	0.664	0.768	0.845
3405	High	Unambiguous	ESDDKPEIEDVGSDEEEEEKK	[K].ESDDKPEIEDVGSDEEEEEKK.[D]	3xTMT6plex [K5; K20; K21]; 1xTMT6plex [N-Term]; 1xPhospho [S13(100)]	3xTMT6plex [K5; K20; K21]; 1xTMT6plex [N-Term]; 1xPhospho [S2(0); S13(100)]	P07901 1xPhospho [S263(100)]	P07901 1xPhospho [S252(0); S263(100)]	0.00148697	0.000404169	1.031	1	1	5	P07901	P07901	Heat shock protein HSP 90-alpha OS=Mus musculus OX=10090 GN=Hsp90aa1 PE=1 SV=4	Hsp90aa1	Hsp90aa1_S263	YES	P07901	P07901 [251-271]	1	3432.66	21	0	0.765	1.153	0.517	-0.39	0.2	-0.95	0.0773396	0.299388	0.00270206	0.476384	0.896247	0.0332875	6.1	53.72	27.93	9.03885	8.86705	10.1019	0.851	0.567	0.744		0.786
2265	High	Unambiguous	EGSLGDELLPLGYAEPEPQEGASAGAPSPTLELASR	[K].EGSLGDELLPLGYAEPEPQEGASAGAPSPTLELASR.[S]	1xTMT6plex [N-Term]; 1xPhospho [T30(96.1)]	1xTMT6plex [N-Term]; 1xPhospho [S3(0); Y13(0); S23(0); S28(3.3); T30(96.1); S35(0.6)]	Q6WVG3 1xPhospho [T180(96.1)]	Q6WVG3 1xPhospho [S153(0); Y163(0); S173(0); S178(3.3); T180(96.1); S185(0.6)]	8.04e-05	0	1.622	1	1	6	Q6WVG3	Q6WVG3	BTB/POZ domain-containing protein KCTD12 OS=Mus musculus OX=10090 GN=Kctd12 PE=1 SV=1	Kctd12	Kctd12_S178	YES	Q6WVG3	Q6WVG3 [151-186]	0	3917.89	36	0	0.62	0.605	0.536	-0.69	-0.73	-0.9	0.00352057	0.00630376	0.0240987	0.0538427	0.123174	0.187721	7.27	2.73	0.29	6.58496	5.43296	8.00843	0.62		0.541	0.919
4052	High	Unambiguous	SAPPAGDEPLAETESESEAELAGFSPVVDVK	[K].SAPPAGDEPLAETESESEAELAGFSPVVDVK.[K]	1xTMT6plex [K31]; 1xTMT6plex [N-Term]; 3xPhospho [T13(100); S15(100); S17(100)]	1xTMT6plex [K31]; 1xTMT6plex [N-Term]; 3xPhospho [S1(0.1); T13(100); S15(100); S17(100); S25(0)]	Q6NS82 3xPhospho [T274(100); S276(100); S278(100)]	Q6NS82 3xPhospho [S262(0.1); T274(100); S276(100); S278(100); S286(0)]	0.00383344	0.000677187	0.834	1	1	3	Q6NS82	Q6NS82	Reticulophagy regulator 2 OS=Mus musculus OX=10090 GN=Retreg2 PE=1 SV=2	Retreg2	Retreg2_T274;S276;S278	YES	Q6NS82	Q6NS82 [262-292]	0	3826.7	31	0	0.823	1.161	1.062	-0.28	0.22	0.09	0.424031	0.471392	0.812002	0.957941	0.965165	0.998116	53.55	31.83	30.66	5.17393	5.15381	5.88753	0.359	0.823			1.262
2100	High	Unambiguous	DIIRQPSEEEIIK	[K].DIIRQPSEEEIIK.[L]	1xTMT6plex [K13]; 1xTMT6plex [N-Term]; 1xPhospho [S7(100)]	1xTMT6plex [K13]; 1xTMT6plex [N-Term]; 1xPhospho [S7(100)]	Q62048 1xPhospho [S116(100)]	Q62048 1xPhospho [S116(100)]	0.000101342	0	1.576	1	1	10	Q62048	Q62048	Astrocytic phosphoprotein PEA-15 OS=Mus musculus OX=10090 GN=Pea15 PE=1 SV=1	Pea15	Pea15_S116	YES	Q62048	Q62048 [110-122]	1	2108.14	13	0	0.798	1.078	0.972	-0.33	0.11	-0.04	0.103823	0.587621	0.796163	0.563724	0.983139	0.998116	10.07	25.42	46.69	10.8239	8.90569	11.5177	0.182	0.871	0.544	0.798	0.883
5480	High	Unambiguous	GSPRYSPRHSR	[R].GSPRYSPRHSR.[S]	1xTMT6plex [N-Term]; 3xPhospho [S2(100); S6(100); S10(100)]	1xTMT6plex [N-Term]; 3xPhospho [S2(100); Y5(0); S6(100); S10(100)]	Q6PDM2 3xPhospho [S234(100); S238(100); S242(100)]	Q6PDM2 3xPhospho [S234(100); Y237(0); S238(100); S242(100)]	0.0238455	0.00264733	0.48	1	1	5	Q6PDM2	Q6PDM2	Serine/arginine-rich splicing factor 1 OS=Mus musculus OX=10090 GN=Srsf1 PE=1 SV=3	Srsf1	Srsf1_S234;S242;S238	YES	Q6PDM2	Q6PDM2 [233-243]	2	1768.73	11	0	1.081	1.122	2.832	0.11	0.17	1.5	0.595492	0.350933	3.7e-05	0.98968	0.922977	0.000822059	13.8	27.1	42	8.49346	7.48462	9.51314	0.182	1.182		1.081
757	High	Unambiguous	IIPTLEEGLQLPSPTATSQLPLESDAVECLNYQHYK	[K].IIPTLEEGLQLPSPTATSQLPLESDAVECLNYQHYK.[G]	1xCarbamidomethyl [C29]; 1xTMT6plex [K36]; 1xTMT6plex [N-Term]; 1xPhospho [T15(74.7)]	1xCarbamidomethyl [C29]; 1xTMT6plex [K36]; 1xTMT6plex [N-Term]; 1xPhospho [T4(0); S13(11.7); T15(74.7); T17(11.7); S18(1.9); S24(0); Y32(0); Y35(0)]	P61979 1xPhospho [T118(74.7)]	P61979 1xPhospho [T107(0); S116(11.7); T118(74.7); T120(11.7); S121(1.9); S127(0); Y135(0); Y138(0)]	1.38e-05	0	1.972	1	1	11	P61979	P61979	Heterogeneous nuclear ribonucleoprotein K OS=Mus musculus OX=10090 GN=Hnrnpk PE=1 SV=1	Hnrnpk	Hnrnpk_T118	YES	P61979	P61979 [104-139]	0	4593.32	36	0	0.659	1.023	0.777	-0.6	0.03	-0.36	0.0142501	0.803655	0.35072	0.152772	0.994856	0.919404	4.35	47.08	30.35	6.69488	6.10014	7.80025	0.358	0.703	0.659
3632	High	Unambiguous	TGPPPISPSK	[R].TGPPPISPSK.[R]	1xTMT6plex [K10]; 1xTMT6plex [N-Term]; 1xPhospho [S7(100)]	1xTMT6plex [K10]; 1xTMT6plex [N-Term]; 1xPhospho [T1(0); S7(100); S9(0)]	Q80V24 1xPhospho [S58(100)]	Q80V24 1xPhospho [T52(0); S58(100); S60(0)]	0.00314351	0.000530845	0.875	1	1	5	Q80V24	Q80V24	Transcription cofactor vestigial-like protein 4 OS=Mus musculus OX=10090 GN=Vgll4 PE=1 SV=1	Vgll4	Vgll4_S58	YES	Q80V24	Q80V24 [52-61]	0	1518.83	10	0	1.031	1.124	2.549	0.04	0.17	1.35	0.830088	0.38039	0.00147442	0.999182	0.93353	0.0203027	25.62	18.5	76.76	9.05989	9.12127	8.49346	1.031	0.869	0.795	1.21	1.239
2674	High	Unambiguous	APSVANIGSHCDLSLK	[R].APSVANIGSHCDLSLK.[I]	1xCarbamidomethyl [C11]; 1xTMT6plex [K16]; 1xTMT6plex [N-Term]; 1xPhospho [S3(100)]	1xCarbamidomethyl [C11]; 1xTMT6plex [K16]; 1xTMT6plex [N-Term]; 1xPhospho [S3(100); S9(0); S14(0)]	Q8BTM8 1xPhospho [S2152(100)]	Q8BTM8 1xPhospho [S2152(100); S2158(0); S2163(0)]	0.000196586	0	1.444	1	1	4	Q8BTM8	Q8BTM8	Filamin-A OS=Mus musculus OX=10090 GN=Flna PE=1 SV=5	Flna	Flna_S2152	YES	Q8BTM8	Q8BTM8 [2150-2165]	0	2207.13	16	0	0.801	0.804	0.584	-0.32	-0.32	-0.78	0.198216	0.124201	0.0484396	0.767518	0.690306	0.315231	15.41	6.36	28.87	8.05795	7.147	9.08966	0.583	0.91	0.705		0.952
2005	High	Unambiguous	EAEEESSGGEEEDEDENIEVVYSK	[K].EAEEESSGGEEEDEDENIEVVYSK.[T]	1xTMT6plex [K24]; 1xTMT6plex [N-Term]; 2xPhospho [S6(100); S7(100)]	1xTMT6plex [K24]; 1xTMT6plex [N-Term]; 2xPhospho [S6(100); S7(100); Y22(0); S23(0)]	P59325 2xPhospho [S387(100); S388(100)]	P59325 2xPhospho [S387(100); S388(100); Y403(0); S404(0)]	7.53e-05	0	1.635	1	1	7	P59325	P59325	Eukaryotic translation initiation factor 5 OS=Mus musculus OX=10090 GN=Eif5 PE=1 SV=1	Eif5	Eif5_S387;S388	YES	P59325	P59325 [382-405]	0	3320.35	24	0	0.715	0.98	1.03	-0.48	-0.03	0.04	0.118325	0.980476	0.880939	0.60723	0.999661	0.99895	4.03	11.57	15.49	5.47573	5.71973	5.87529	0.677	0.7	1.17	1.115	0.715
1960	High	Unambiguous	SLSDSESDDSK	[K].SLSDSESDDSK.[S]	1xTMT6plex [K11]; 1xTMT6plex [N-Term]; 1xPhospho [S3(100)]	1xTMT6plex [K11]; 1xTMT6plex [N-Term]; 1xPhospho [S1(0); S3(100); S5(0); S7(0); S10(0)]	P23198 1xPhospho [S95(100)]	P23198 1xPhospho [S93(0); S95(100); S97(0); S99(0); S102(0)]	1.73e-05	0	1.927	1	1	19	P23198	P23198	Chromobox protein homolog 3 OS=Mus musculus OX=10090 GN=Cbx3 PE=1 SV=2	Cbx3	Cbx3_S95	YES	P23198	P23198 [93-103]	0	1707.77	11	0	0.839	0.971	0.62	-0.25	-0.04	-0.69	0.200954	0.809122	0.0269065	0.77337	0.994856	0.204516	16.75	2.93	8.67	10.4933	9.94866	11.4297	0.582	0.839	0.586	0.934	0.974
340	High	Unambiguous	NRNSNVVPYDFNR	[K].NRNSNVVPYDFNR.[V]	1xTMT6plex [N-Term]; 1xPhospho [S4(100)]	1xTMT6plex [N-Term]; 1xPhospho [S4(100); Y9(0)]	P06800 1xPhospho [S964(100)]	P06800 1xPhospho [S964(100); Y969(0)]	0.000101853	0	1.575	1	1	8	P06800	P06800	Receptor-type tyrosine-protein phosphatase C OS=Mus musculus OX=10090 GN=Ptprc PE=1 SV=4	Ptprc	Ptprc_S964	YES	P06800	P06800 [961-973]	1	1903.9	13	0	0.71	1.132	0.456	-0.49	0.18	-1.13	0.0138834	0.343164	0.000706831	0.149897	0.919516	0.0108319	18.53	38.25	21.12	8.44915	7.51096	9.31719	0.476	0.71	0.534	0.819	1.004
3713	High	Unambiguous	AEEGGESEGDASEKDAK	[K].AEEGGESEGDASEKDAK.[E]	2xTMT6plex [K14; K17]; 1xTMT6plex [N-Term]; 1xPhospho [S7(98.9)]	2xTMT6plex [K14; K17]; 1xTMT6plex [N-Term]; 1xPhospho [S7(98.9); S12(1.1)]	Q8BGC0 1xPhospho [S441(98.9)]	Q8BGC0 1xPhospho [S441(98.9); S446(1.1)]	0.00309837	0.000530845	0.878	1	1	4	Q8BGC0	Q8BGC0	HIV Tat-specific factor 1 homolog OS=Mus musculus OX=10090 GN=Htatsf1 PE=1 SV=1	Htatsf1	Htatsf1_S441	YES	Q8BGC0	Q8BGC0 [435-451]	1	2476.17	17	0	0.696	0.696	1.069	-0.52	-0.52	0.1	0.00965022	0.00660578	0.912564	0.114433	0.12605	0.999462	19.13	2.06	18.15	9.63045	8.55152	9.69592	0.347		0.696		0.881
3765	High	Unambiguous	SFLQSLECLR	[K].SFLQSLECLR.[R]	1xCarbamidomethyl [C8]; 1xTMT6plex [N-Term]; 1xPhospho [S5(100)]	1xCarbamidomethyl [C8]; 1xTMT6plex [N-Term]; 1xPhospho [S1(0); S5(100)]	Q3UPL5 1xPhospho [S210(100)]	Q3UPL5 1xPhospho [S206(0); S210(100)]	0.00334708	0.000530845	0.862	1	1	6	Q3UPL5	Q3UPL5	Uncharacterized protein C11orf96 homolog OS=Mus musculus OX=10090 GN=Ag2 PE=1 SV=2	Ag2	Ag2_S210	YES	Q3UPL5	Q3UPL5 [206-215]	0	1561.76	10	0	0.587	0.89	0.9	-0.77	-0.17	-0.15	0.000833711	0.512612	0.582104	0.0171271	0.970896	0.996923	9.66	47.82	19.62	8.00169	6.74147	8.3403	0.393	0.67	0.288	0.587	0.698
3784	High	Unambiguous	SKPSSPVVSEKEFNLDDNIPEDDSGVLTPEDSGK	[K].SKPSSPVVSEKEFNLDDNIPEDDSGVLTPEDSGK.[S]	3xTMT6plex [K2; K11; K34]; 1xTMT6plex [N-Term]; 1xPhospho [S/T]	3xTMT6plex [K2; K11; K34]; 1xTMT6plex [N-Term]; 1xPhospho [S1(0); S4(7.8); S5(46.1); S9(46.1); S24(0); T28(0); S32(0)]	Q8K352 1xPhospho [S/T]	Q8K352 1xPhospho [S34(0); S37(7.8); S38(46.1); S42(46.1); S57(0); T61(0); S65(0)]	0.00322024	0.000530845	0.87	1	1	11	Q8K352	Q8K352	SAM and SH3 domain-containing protein 3 OS=Mus musculus OX=10090 GN=Sash3 PE=1 SV=2	Sash3	Sash3_S42	YES	Q8K352	Q8K352 [34-67]	1	4628.33	34	0	0.924	1.623	1.094	-0.11	0.7	0.13	0.73577	0.00815504	0.711369	0.996168	0.147587	0.998116	21.55	84.12	58.59	7.48059	5.40259	7.66035	0.225	1.081	0.701	1.053	0.924
3640	High	Unambiguous	VSSPVLETVQQRTPSR	[K].VSSPVLETVQQRTPSR.[E]	1xTMT6plex [N-Term]; 2xPhospho [S2(89.9); T8(99.8)]	1xTMT6plex [N-Term]; 2xPhospho [S2(89.9); S3(10.1); T8(99.8); T13(0.2); S15(0)]	Q8BTI8 2xPhospho [S1360(87.7); T/S]	Q8BTI8 2xPhospho [S1359(12.3); S1360(87.7); T1365(1.1); T1370(49.5); S1372(49.5)]	0.00331489	0.000530845	0.864	1	1	8	Q8BTI8	Q8BTI8	Serine/arginine repetitive matrix protein 2 OS=Mus musculus OX=10090 GN=Srrm2 PE=1 SV=3	Srrm2	Srrm2_S1360;[T1370/S1372]	YES	Q8BTI8	Q8BTI8 [1358-1373]	1	2173.06	16	0	0.837	1.408	1.959	-0.26	0.49	0.97	0.204573	0.0264613	0.0215095	0.77709	0.310869	0.172099	47.64	51.48	94.03	8.48295	7.60343	8.90787	0.147	1.288	0.607	1.154
3089	High	Unambiguous	MSQPGSPSPK	[K].MSQPGSPSPK.[T]	1xOxidation [M1]; 1xTMT6plex [K10]; 1xTMT6plex [N-Term]; 1xPhospho [S6(99.6)]	1xOxidation [M1]; 1xTMT6plex [K10]; 1xTMT6plex [N-Term]; 1xPhospho [S2(0); S6(99.6); S8(0.4)]	Q6PDQ2 1xPhospho [S1528(99.6)]	Q6PDQ2 1xPhospho [S1524(0); S1528(99.6); S1530(0.4)]	0.00123288	0.000209709	1.07	1	1	5	Q6PDQ2	Q6PDQ2	Chromodomain-helicase-DNA-binding protein 4 OS=Mus musculus OX=10090 GN=Chd4 PE=1 SV=1	Chd4	Chd4_S1528	YES	Q6PDQ2	Q6PDQ2 [1523-1532]	0	1569.77	10	0	0.737	1.024	0.862	-0.44	0.03	-0.21	0.0392493	0.843835	0.436784	0.310765	0.995193	0.967678	21.48	26.58	44.48	9.12049	8.6057	10.0304	0.516	0.598	0.989		0.909
2812	High	Unambiguous	GPSEAPQEAEAEEGATSDGEKKR	[K].GPSEAPQEAEAEEGATSDGEKKR.[E]	2xTMT6plex [K21; K22]; 1xTMT6plex [N-Term]; 1xPhospho [T/S]	2xTMT6plex [K21; K22]; 1xTMT6plex [N-Term]; 1xPhospho [S3(0); T16(50); S17(50)]	Q9WTQ5 1xPhospho [T/S]	Q9WTQ5 1xPhospho [S570(0); T583(50); S584(50)]	1.71e-05	0	1.929	1	1	7	Q9WTQ5	Q9WTQ5	A-kinase anchor protein 12 OS=Mus musculus OX=10090 GN=Akap12 PE=1 SV=1	Akap12	Akap12_T583	YES	Q9WTQ5	Q9WTQ5 [568-590]	2	3140.54	23	0	0.949	0.939	2.41	-0.08	-0.09	1.27	0.746956	0.690951	0.000921663	0.997836	0.99264	0.0137634	25.19	20.63	92.15	8.729	8.14966	9.22281	0.268	1.263		0.906	0.993
293	High	Unambiguous	RFESEDDIDALAFGK	[R].RFESEDDIDALAFGK.[Q]	1xTMT6plex [K15]; 1xTMT6plex [N-Term]; 1xPhospho [S4(100)]	1xTMT6plex [K15]; 1xTMT6plex [N-Term]; 1xPhospho [S4(100)]	Q8R4U0 1xPhospho [S2503(100)]	Q8R4U0 1xPhospho [S2503(100)]	8.31e-06	0	2.072	1	1	6	Q8R4U0	Q8R4U0	Stabilin-2 OS=Mus musculus OX=10090 GN=Stab2 PE=1 SV=1	Stab2	Stab2_S2503	YES	Q8R4U0	Q8R4U0 [2500-2514]	1	2251.1	15	0	0.835	0.857	0.463	-0.26	-0.22	-1.11	0.328848	0.45756	0.00414754	0.899759	0.964357	0.0464977	4.87	8.05	24.34	6.54071	6.04002	7.79766	0.602	0.835	0.804	0.874	1.01
3738	High	Unambiguous	ASSPSLFSTEGKPK	[R].ASSPSLFSTEGKPK.[M]	2xTMT6plex [K12; K14]; 1xTMT6plex [N-Term]; 1xPhospho [S3(94.2)]	2xTMT6plex [K12; K14]; 1xTMT6plex [N-Term]; 1xPhospho [S2(5.5); S3(94.2); S5(0.3); S8(0); T9(0)]	Q8R550 1xPhospho [S631(94.2)]	Q8R550 1xPhospho [S630(5.5); S631(94.2); S633(0.3); S636(0); T637(0)]	0.00199227	0.000530845	0.97	1	1	20	Q8R550	Q8R550	SH3 domain-containing kinase-binding protein 1 OS=Mus musculus OX=10090 GN=Sh3kbp1 PE=1 SV=1	Sh3kbp1	Sh3kbp1_[S630/S631/S633]	YES	Q8R550	Q8R550 [629-642]	0	2203.2	14	0	0.725	1.184	0.864	-0.46	0.24	-0.21	0.0237442	0.21343	0.44197	0.22136	0.820639	0.969097	2.33	30.25	38.94	10.0707	8.93162	10.8691	0.725	0.705	0.703	0.954	0.963
3924	High	Unambiguous	LNTSDFQK	[R].LNTSDFQK.[L]	1xTMT6plex [K8]; 1xTMT6plex [N-Term]; 1xPhospho [T3(99.8)]	1xTMT6plex [K8]; 1xTMT6plex [N-Term]; 1xPhospho [T3(99.8); S4(0.2)]	Q9D1F4 1xPhospho [T247(99.8)]	Q9D1F4 1xPhospho [T247(99.8); S248(0.2)]	0.00217177	0.000530845	0.952	1	1	4	Q9D1F4	Q9D1F4	Proline-rich AKT1 substrate 1 OS=Mus musculus OX=10090 GN=Akt1s1 PE=1 SV=1	Akt1s1	Akt1s1_T247	YES	Q9D1F4	Q9D1F4 [245-252]	0	1490.77	8	0	0.472	1.75	0.931	-1.08	0.81	-0.1	6.54e-07	0.000315518	0.655113	3.43e-05	0.0130613	0.998116	9.24	17.65	25.16	9.80816	7.87283	10.0554	0.34	0.472			0.656
720	High	Unambiguous	LATSSPEQSWPSTFK	[R].LATSSPEQSWPSTFK.[A]	1xTMT6plex [K15]; 1xTMT6plex [N-Term]; 1xPhospho [T/S]	1xTMT6plex [K15]; 1xTMT6plex [N-Term]; 1xPhospho [T3(33.3); S4(33.3); S5(33.3); S9(0); S12(0); T13(0)]	Q60953 1xPhospho [T/S]	Q60953 1xPhospho [T513(33.3); S514(33.3); S515(33.3); S519(0); S522(0); T523(0)]	0.000190769	0	1.45	1	1	17	Q60953	Q60953	Protein PML OS=Mus musculus OX=10090 GN=Pml PE=1 SV=3	Pml	Pml_[T513/S514/S515]	YES	Q60953	Q60953 [511-525]	0	2204.1	15	0	0.922	0.805	0.8	-0.12	-0.31	-0.32	0.613569	0.108865	0.320296	0.98968	0.663315	0.894405	25.14	21.73	17.89	8.24555	7.40173	9.20286	0.686	0.922	0.738	1.129	0.977
1144	High	Unambiguous	TDSREDEISPPPPNPVVK	[R].TDSREDEISPPPPNPVVK.[G]	1xTMT6plex [K18]; 1xTMT6plex [N-Term]; 1xPhospho [S9(100)]	1xTMT6plex [K18]; 1xTMT6plex [N-Term]; 1xPhospho [T1(0); S3(0); S9(100)]	Q9DBC7 1xPhospho [S83(100)]	Q9DBC7 1xPhospho [T75(0); S77(0); S83(100)]	4.53e-05	0	1.736	1	1	6	Q9DBC7	Q9DBC7	cAMP-dependent protein kinase type I-alpha regulatory subunit OS=Mus musculus OX=10090 GN=Prkar1a PE=1 SV=3	Prkar1a	Prkar1a_S83	YES	Q9DBC7	Q9DBC7 [75-92]	1	2515.28	18	0	0.884	0.919	0.621	-0.18	-0.12	-0.69	0.500921	0.567839	0.052159	0.9798	0.982767	0.330935	17.48	12.9	27.72	7.85907	7.15536	8.80016	0.544	0.943	1.092		0.829
3321	High	Unambiguous	RKSLSDSESDDSK	[K].RKSLSDSESDDSK.[S]	2xTMT6plex [K2; K13]; 1xTMT6plex [N-Term]; 3xPhospho [S3(100); S5(100); S7(99.5)]	2xTMT6plex [K2; K13]; 1xTMT6plex [N-Term]; 3xPhospho [S3(100); S5(100); S7(99.5); S9(0.5); S12(0)]	P23198 3xPhospho [S93(100); S95(100); S97(99.5)]	P23198 3xPhospho [S93(100); S95(100); S97(99.5); S99(0.5); S102(0)]	0.000964241	0.000209709	1.121	1	1	6	P23198	P23198	Chromobox protein homolog 3 OS=Mus musculus OX=10090 GN=Cbx3 PE=1 SV=2	Cbx3	Cbx3_S93;S95;S97	YES	P23198	P23198 [91-103]	2	2381.06	13	0	0.623	1.05	1.551	-0.68	0.07	0.63	0.000829988	0.645501	0.0758327	0.0170969	0.99264	0.417742	9.2	5.48	28.93	10.4688	9.75956	10.9023	0.523		0.623	0.794
2272	High	Unambiguous	EGVILTNENAASPEQPGDEDAK	[K].EGVILTNENAASPEQPGDEDAK.[Q]	1xTMT6plex [K22]; 1xTMT6plex [N-Term]; 1xPhospho [S12(100)]	1xTMT6plex [K22]; 1xTMT6plex [N-Term]; 1xPhospho [T6(0); S12(100)]	Q1HFZ0 1xPhospho [S723(100)]	Q1HFZ0 1xPhospho [T717(0); S723(100)]	6.36e-09	0	3.493	1	1	5	Q1HFZ0	Q1HFZ0	tRNA (cytosine(34)-C(5))-methyltransferase OS=Mus musculus OX=10090 GN=Nsun2 PE=1 SV=2	Nsun2	Nsun2_S723	YES	Q1HFZ0	Q1HFZ0 [712-733]	0	2822.35	22	0	0.893	1.017	0.898	-0.16	0.02	-0.15	0.570021	0.858152	0.643268	0.98968	0.996046	0.998116	12.78	12.33	48.23	7.25433	6.9982	8.0462	0.835	1.024	0.954		0.7
5003	High	Unambiguous	KSSLVTSK	[R].KSSLVTSK.[L]	2xTMT6plex [K1; K8]; 1xTMT6plex [N-Term]; 1xPhospho [S3(99.7)]	2xTMT6plex [K1; K8]; 1xTMT6plex [N-Term]; 1xPhospho [S2(0.3); S3(99.7); T6(0); S7(0)]	P60840 1xPhospho [S109(99.7)]	P60840 1xPhospho [S108(0.3); S109(99.7); T112(0); S113(0)]	0.0120173	0.00144147	0.608	1	1	9	P60840	P60840	Alpha-endosulfine OS=Mus musculus OX=10090 GN=Ensa PE=1 SV=1	Ensa	Ensa_S109	YES	P60840	P60840 [107-114]	1	1616.96	8	0	0.554	1.159	0.809	-0.85	0.21	-0.31	3.28e-05	0.226457	0.290042	0.00112251	0.837209	0.859518	8.83	19.93	33.24	11.2823	9.57478	11.7252	0.446	0.554	0.336	0.589	0.82
878	High	Unambiguous	LASPSGSTSSGLEVVAPEVTSAPVSGPGILDDSATICR	[R].LASPSGSTSSGLEVVAPEVTSAPVSGPGILDDSATICR.[V]	1xCarbamidomethyl [C37]; 1xTMT6plex [N-Term]; 3xPhospho [S7(75.7); T8(88.4); S9(76.5)]	1xCarbamidomethyl [C37]; 1xTMT6plex [N-Term]; 3xPhospho [S3(17.9); S5(17.9); S7(75.7); T8(88.4); S9(76.5); S10(23.5); T20(0); S21(0); S25(0); S33(0); T35(0)]	Q62318 3xPhospho [S598(75.7); T599(88.4); S600(76.5)]	Q62318 3xPhospho [S594(17.9); S596(17.9); S598(75.7); T599(88.4); S600(76.5); S601(23.5); T611(0); S612(0); S616(0); S624(0); T626(0)]	1.73e-05	0	1.927	1	1	10	Q62318	Q62318	Transcription intermediary factor 1-beta OS=Mus musculus OX=10090 GN=Trim28 PE=1 SV=3	Trim28	Trim28_T599;S598;S600	YES	Q62318	Q62318 [592-629]	0	4153.89	38	0	0.812	1.08	0.777	-0.3	0.11	-0.36	0.357507	0.780465	0.320847	0.917735	0.994021	0.894629	6.27	39.79	33.02	5.35538	4.76192	6.11558	0.541	0.828	0.901		0.797
2252	High	Unambiguous	EVDQDDEENSEEDEMDSGTMVR	[R].EVDQDDEENSEEDEMDSGTMVR.[A]	2xOxidation [M15; M20]; 1xTMT6plex [N-Term]; 1xPhospho [S10(100)]	2xOxidation [M15; M20]; 1xTMT6plex [N-Term]; 1xPhospho [S10(100); S17(0); T19(0)]	Q9JI11 1xPhospho [S320(100)]	Q9JI11 1xPhospho [S320(100); S327(0); T329(0)]	1.95e-07	0	2.815	1	1	8	Q9JI11	Q9JI11	Serine/threonine-protein kinase 4 OS=Mus musculus OX=10090 GN=Stk4 PE=1 SV=1	Stk4	Stk4_S320	YES	Q9JI11	Q9JI11 [311-332]	0	2900.08	22	0	0.931	0.936	0.675	-0.1	-0.1	-0.57	0.801279	0.747888	0.135049	0.998955	0.99264	0.589271	7.7	33.41	17.11	7.07831	6.57276	7.94043	0.895	0.817	0.968		1.005
1185	High	Unambiguous	TSSLVGPTQSFFMR	[R].TSSLVGPTQSFFMR.[E]	1xOxidation [M13]; 1xTMT6plex [N-Term]; 1xPhospho [T/S]	1xOxidation [M13]; 1xTMT6plex [N-Term]; 1xPhospho [T1(33.3); S2(33.3); S3(33.3); T8(0); S10(0)]	P19437 1xPhospho [T/S]	P19437 1xPhospho [T27(33.3); S28(33.3); S29(33.3); T34(0); S36(0)]	0.000379256	0	1.312	1	1	16	P19437	P19437	B-lymphocyte antigen CD20 OS=Mus musculus OX=10090 GN=Ms4a1 PE=1 SV=1	Ms4a1	Ms4a1_S29	YES	P19437	P19437 [27-40]	0	1882.9	14	0	0.863	1.165	0.627	-0.21	0.22	-0.67	0.400484	0.239129	0.103275	0.947	0.849352	0.504603	20.05	41.26	35.89	8.14335	7.04266	9.06735	0.73	0.707	1.02		1.109
3399	High	Unambiguous	RGASASPQGRQSPSPSTRPIR	[R].RGASASPQGRQSPSPSTRPIR.[R]	1xTMT6plex [N-Term]; 3xPhospho [S4(100); S6(100); S12(89.1)]	1xTMT6plex [N-Term]; 3xPhospho [S4(100); S6(100); S12(89.1); S14(9.8); S16(1.2); T17(0)]	Q52KI8 3xPhospho [S723(100); S725(100); S731(89.1)]	Q52KI8 3xPhospho [S723(100); S725(100); S731(89.1); S733(9.8); S735(1.2); T736(0)]	0.00148697	0.000404169	1.031	1	1	4	Q52KI8	Q52KI8	Serine/arginine repetitive matrix protein 1 OS=Mus musculus OX=10090 GN=Srrm1 PE=1 SV=2	Srrm1	Srrm1_S723;S725;S731	YES	Q52KI8	Q52KI8 [720-740]	2	2662.22	21	0	0.831	1.449	2.066	-0.27	0.54	1.05	0.201237	0.0164459	0.00749296	0.77337	0.239499	0.0742637	48.47	43.94	18.18	8.70563	7.81826	9.20653	0.306	1.224	0.831
2557	High	Unambiguous	ATSPPHLDGTSNPESTVPEKK	[K].ATSPPHLDGTSNPESTVPEKK.[I]	2xTMT6plex [K20; K21]; 1xTMT6plex [N-Term]; 1xPhospho [S3(99.1)]	2xTMT6plex [K20; K21]; 1xTMT6plex [N-Term]; 1xPhospho [T2(0.9); S3(99.1); T10(0); S11(0); S15(0); T16(0)]	Q60953 1xPhospho [S528(99.1)]	Q60953 1xPhospho [T527(0.9); S528(99.1); T535(0); S536(0); S540(0); T541(0)]	4.88e-05	0	1.721	1	1	21	Q60953	Q60953	Protein PML OS=Mus musculus OX=10090 GN=Pml PE=1 SV=3	Pml	Pml_[T527/S528]	YES	Q60953	Q60953 [526-546]	1	2959.54	21	0	0.991	1.015	0.866	-0.01	0.02	-0.21	0.997341	0.904209	0.446673	0.99999	0.997038	0.970969	24.34	24.54	49.15	9.53838	8.75889	10.015	0.537	0.991	0.664	1.001	1.157
4064	High	Unambiguous	RPMSSPEMK	[K].RPMSSPEMK.[S]	2xOxidation [M3; M8]; 1xTMT6plex [K9]; 1xTMT6plex [N-Term]; 1xPhospho [S5(96.8)]	2xOxidation [M3; M8]; 1xTMT6plex [K9]; 1xTMT6plex [N-Term]; 1xPhospho [S4(3.2); S5(96.8)]	Q61191 1xPhospho [S2030(96.8)]	Q61191 1xPhospho [S2029(3.2); S2030(96.8)]	0.00418472	0.000677187	0.816	1	1	11	Q61191	Q61191	Host cell factor 1 OS=Mus musculus OX=10090 GN=Hcfc1 PE=1 SV=2	Hcfc1	Hcfc1_S2030	YES	Q61191	Q61191 [2026-2034]	0	1632.79	9	0	0.739	0.844	1.055	-0.44	-0.24	0.08	0.0313908	0.247314	0.921381	0.267791	0.853713	0.999462	17.75	4.4	7.86	9.47687	9.08702	10.0686	0.501	0.61	0.907		0.895
4602	High	Unambiguous	SSSPEPVTHLK	[K].SSSPEPVTHLK.[W]	1xTMT6plex [K11]; 1xTMT6plex [N-Term]; 1xPhospho [S1(90.2)]	1xTMT6plex [K11]; 1xTMT6plex [N-Term]; 1xPhospho [S1(90.2); S2(4.9); S3(4.9); T8(0)]	Q5FWK3 1xPhospho [S49(90.2)]	Q5FWK3 1xPhospho [S49(90.2); S50(4.9); S51(4.9); T56(0)]	0.00780629	0.000907142	0.691	1	1	9	Q5FWK3	Q5FWK3	Rho GTPase-activating protein 1 OS=Mus musculus OX=10090 GN=Arhgap1 PE=1 SV=1	Arhgap1	Arhgap1_S51	YES	Q5FWK3	Q5FWK3 [49-59]	0	1719.91	11	0	0.912	0.846	0.802	-0.13	-0.24	-0.32	0.631093	0.36588	0.328771	0.98968	0.926113	0.902731	5.52	7.76	24.68	7.92845	7.57224	8.7283	0.539	0.906	0.919		0.988
1530	High	Unambiguous	SETAPAETAAPAPVEK	[M].SETAPAETAAPAPVEK.[S]	1xAcetyl [N-Term]; 1xTMT6plex [K16]; 1xTMT6plex [N-Term]; 1xPhospho [S1(99.9)]	1xAcetyl [N-Term]; 1xTMT6plex [K16]; 1xTMT6plex [N-Term]; 1xPhospho [S1(99.9); T3(0.1); T8(0)]	P43276 1xAcetyl [N-Term]; 1xPhospho [S2(99.9)]	P43276 1xAcetyl [N-Term]; 1xPhospho [S2(99.9); T4(0.1); T9(0)]	0.000131617	0	1.524	1	1	27	P43276	P43276	Histone H1.5 OS=Mus musculus OX=10090 GN=Hist1h1b PE=1 SV=2	Hist1h1b	Hist1h1b_[S2/T4]	YES	P43276	P43276 [2-17]	0	2149.08	16	0	0.85	0.903	0.588	-0.23	-0.15	-0.77	0.226137	0.468725	0.0144615	0.807358	0.964738	0.128263	4.53	15.78	27.73	10.0135	9.01699	10.8203	0.623	0.871	0.83		0.901
5589	High	Unambiguous	KRSPSPSPTPEAK	[R].KRSPSPSPTPEAK.[K]	2xTMT6plex [K1; K13]; 1xTMT6plex [N-Term]; 2xPhospho [S3(85.7); S5(85.7)]	2xTMT6plex [K1; K13]; 1xTMT6plex [N-Term]; 2xPhospho [S3(85.7); S5(85.7); S7(14.3); T9(14.3)]	Q6PDG5 2xPhospho [S302(85.7); S304(85.7)]	Q6PDG5 2xPhospho [S302(85.7); S304(85.7); S306(14.3); T308(14.3)]	0.0268674	0.00274619	0.458	1	1	5	Q6PDG5	Q6PDG5	SWI/SNF complex subunit SMARCC2 OS=Mus musculus OX=10090 GN=Smarcc2 PE=1 SV=2	Smarcc2	Smarcc2_S304;S306	YES	Q6PDG5	Q6PDG5 [300-312]	2	2229.16	13	0	0.698	0.988	0.882	-0.52	-0.02	-0.18	0.0149206	0.962766	0.498916	0.158618	0.998927	0.984677	2.69	23.76	10.38	8.29947	7.76	9.2983	0.705	0.691		0.802	0.653
5013	High	Unambiguous	LFSSSGLK	[K].LFSSSGLK.[K]	1xTMT6plex [K8]; 1xTMT6plex [N-Term]; 1xPhospho [S3(96.1)]	1xTMT6plex [K8]; 1xTMT6plex [N-Term]; 1xPhospho [S3(96.1); S4(3.7); S5(0.2)]	Q9WTQ5 1xPhospho [S505(96.1)]	Q9WTQ5 1xPhospho [S505(96.1); S506(3.7); S507(0.2)]	0.0129397	0.00144147	0.594	1	1	7	Q9WTQ5	Q9WTQ5	A-kinase anchor protein 12 OS=Mus musculus OX=10090 GN=Akap12 PE=1 SV=1	Akap12	Akap12_S505	YES	Q9WTQ5	Q9WTQ5 [503-510]	0	1376.76	8	0	1.008	1.586	1.264	0.01	0.67	0.34	0.902421	0.00234542	0.412605	0.999853	0.0604322	0.95558	47.09	42.15	22.82	9.48543	8.17891	9.7342	1.008	1.328	0.224
2776	High	Unambiguous	GGEDEDGSDEDVVHNEDIHFEPIVSLPEVEVK	[K].GGEDEDGSDEDVVHNEDIHFEPIVSLPEVEVK.[S]	1xTMT6plex [K32]; 1xTMT6plex [N-Term]; 1xPhospho [S8(100)]	1xTMT6plex [K32]; 1xTMT6plex [N-Term]; 1xPhospho [S8(100); S25(0)]	Q9ERU9 1xPhospho [S2729(100)]	Q9ERU9 1xPhospho [S2729(100); S2746(0)]	0.000238892	0	1.405	1	1	4	Q9ERU9	Q9ERU9	E3 SUMO-protein ligase RanBP2 OS=Mus musculus OX=10090 GN=Ranbp2 PE=1 SV=2	Ranbp2	Ranbp2_S2729	YES	Q9ERU9	Q9ERU9 [2722-2753]	0	4072.9	32	0	0.912	1.141	0.916	-0.13	0.19	-0.13	0.725985	0.404281	0.752349	0.992235	0.940545	0.998116	14.93	26.13	20.6	7.06043	6.32967	7.79843	0.569	0.882	0.944		1.102
4597	High	Unambiguous	ALSLPSLEPPGELR	[R].ALSLPSLEPPGELR.[E]	1xTMT6plex [N-Term]; 1xPhospho [S3(100)]	1xTMT6plex [N-Term]; 1xPhospho [S3(100); S6(0)]	Q9QZK7 1xPhospho [S274(100)]	Q9QZK7 1xPhospho [S274(100); S277(0)]	0.00834461	0.000907142	0.678	1	1	4	Q9QZK7	Q9QZK7	Docking protein 3 OS=Mus musculus OX=10090 GN=Dok3 PE=1 SV=1	Dok3	Dok3_S274	YES	Q9QZK7	Q9QZK7 [272-285]	0	1787.95	14	0	0.803	0.934	0.709	-0.32	-0.1	-0.5	0.240268	0.7961	0.196447	0.820061	0.994856	0.723491	13.6	19.33	41.02	6.48833	5.75005	7.06011	0.717	0.936	0.632		0.899
518	High	Unambiguous	KLSFTESLTGDSPLLSLNK	[R].KLSFTESLTGDSPLLSLNK.[M]	2xTMT6plex [K1; K19]; 1xTMT6plex [N-Term]; 1xPhospho [S3(100)]	2xTMT6plex [K1; K19]; 1xTMT6plex [N-Term]; 1xPhospho [S3(100); T5(0); S7(0); T9(0); S12(0); S16(0)]	P25799 1xPhospho [S940(100)]	P25799 1xPhospho [S940(100); T942(0); S944(0); T946(0); S949(0); S953(0)]	1.6e-05	0	1.942	1	1	7	P25799	P25799	Nuclear factor NF-kappa-B p105 subunit OS=Mus musculus OX=10090 GN=Nfkb1 PE=1 SV=2	Nfkb1	Nfkb1_S940	YES	P25799	P25799 [938-956]	1	2817.56	19	0	0.702	0.927	0.694	-0.51	-0.11	-0.53	0.0617309	0.759313	0.179541	0.417824	0.99264	0.691333	8.03	2.94	30.62	6.29462	5.89966	7.01011	0.883		0.625		0.702
1368	High	Unambiguous	TVSDNSLSSSK	[R].TVSDNSLSSSK.[E]	1xTMT6plex [K11]; 1xTMT6plex [N-Term]; 1xPhospho [S3(99.4)]	1xTMT6plex [K11]; 1xTMT6plex [N-Term]; 1xPhospho [T1(0); S3(99.4); S6(0.5); S8(0); S9(0); S10(0)]	Q80TY0 1xPhospho [S296(99.4)]	Q80TY0 1xPhospho [T294(0); S296(99.4); S299(0.5); S301(0); S302(0); S303(0)]	4.88e-05	0	1.721	1	1	6	Q80TY0	Q80TY0	Formin-binding protein 1 OS=Mus musculus OX=10090 GN=Fnbp1 PE=1 SV=2	Fnbp1	Fnbp1_S299	YES	Q80TY0	Q80TY0 [294-304]	0	1662.84	11	0	0.903	1.021	0.722	-0.15	0.03	-0.47	0.432339	0.908234	0.121256	0.963206	0.997187	0.559263	7.67	14.21	35.55	9.96463	8.95942	10.9033	0.858	0.963	0.903	0.845	1.122
935	High	Unambiguous	TLLLSSDDEF	[K].TLLLSSDDEF.[-]	1xTMT6plex [N-Term]; 1xPhospho [S6(99.8)]	1xTMT6plex [N-Term]; 1xPhospho [T1(0); S5(0.2); S6(99.8)]	Q8BG09 1xPhospho [S403(99.8)]	Q8BG09 1xPhospho [T398(0); S402(0.2); S403(99.8)]	0.000433353	0	1.285	1	1	3	Q8BG09	Q8BG09	Transmembrane protein 184B OS=Mus musculus OX=10090 GN=Tmem184b PE=2 SV=1	Tmem184b	Tmem184b_S403	YES	Q8BG09	Q8BG09 [398-407]	0	1448.68	10	0	0.601	0.622	0.578	-0.73	-0.68	-0.79	0.00232134	0.0205587	0.0287469	0.0390966	0.273858	0.214365	13.88	10.67	13.46	6.66249	5.60881	7.2384	0.601	0.757	0.329
888	High	Unambiguous	IASDEEIQGTK	[R].IASDEEIQGTK.[D]	1xTMT6plex [K11]; 1xTMT6plex [N-Term]; 1xPhospho [S3(100)]	1xTMT6plex [K11]; 1xTMT6plex [N-Term]; 1xPhospho [S3(100); T10(0)]	Q9ET54 1xPhospho [S901(100)]	Q9ET54 1xPhospho [S901(100); T908(0)]	0.000281598	0	1.372	1	1	3	Q9ET54	Q9ET54	Palladin OS=Mus musculus OX=10090 GN=Palld PE=1 SV=2	Palld	Palld_S901	YES	Q9ET54	Q9ET54 [899-909]	0	1728.88	11	0	1.41	1.33	1.512	0.5	0.41	0.6	0.020893	0.0635808	0.1814	0.202561	0.521226	0.694487	53.06	81.92	33.98	8.45615	8.14364	8.99407	0.905	2.853			1.41
483	High	Unambiguous	HTDDEMTGYVATR	[R].HTDDEMTGYVATR.[W]	1xOxidation [M6]; 1xTMT6plex [N-Term]; 1xPhospho [Y9(100)]	1xOxidation [M6]; 1xTMT6plex [N-Term]; 1xPhospho [T2(0); T7(0); Y9(100); T12(0)]	P47811 1xPhospho [Y182(100)]	P47811 1xPhospho [T175(0); T180(0); Y182(100); T185(0)]	1.21e-05	0	1.998	1	1	5	P47811	P47811	Mitogen-activated protein kinase 14 OS=Mus musculus OX=10090 GN=Mapk14 PE=1 SV=3	Mapk14	Mapk14_Y182	YES	P47811	P47811 [174-186]	0	1820.77	13	0	0.848	0.987	0.896	-0.24	-0.02	-0.16	0.35216	0.970508	0.680858	0.911395	0.998927	0.998116	9.88	42.85	40.57	7.48301	6.95187	7.79312	0.77		0.949		0.848
2176	High	Unambiguous	ESAQAVAVALSPKESSEDTEVPLPNK	[K].ESAQAVAVALSPKESSEDTEVPLPNK.[E]	2xTMT6plex [K13; K26]; 1xTMT6plex [N-Term]; 1xPhospho [S11(99.1)]	2xTMT6plex [K13; K26]; 1xTMT6plex [N-Term]; 1xPhospho [S2(0); S11(99.1); S15(0.9); S16(0.1); T19(0)]	Q9QX47 1xPhospho [S1723(99.1)]	Q9QX47 1xPhospho [S1714(0); S1723(99.1); S1727(0.9); S1728(0.1); T1731(0)]	6.33e-07	0	2.582	1	1	3	Q9QX47	Q9QX47	Protein SON OS=Mus musculus OX=10090 GN=Son PE=1 SV=2	Son	Son_S1723	YES	Q9QX47	Q9QX47 [1713-1738]	1	3463.82	26	0	0.834	1.978	2.37	-0.26	0.98	1.24	0.211916	2.1e-05	0.00206204	0.787769	0.00132847	0.0265204	46.52	57.3	38.55	8.30561	6.52199	7.95478	0.243	1.21	0.834
2783	High	Unambiguous	GATPAEDDEDKDIDLFGSDEEEEDKEAAR	[K].GATPAEDDEDKDIDLFGSDEEEEDKEAAR.[L]	2xTMT6plex [K11; K25]; 1xTMT6plex [N-Term]; 1xPhospho [S18(100)]	2xTMT6plex [K11; K25]; 1xTMT6plex [N-Term]; 1xPhospho [T3(0); S18(100)]	P57776 1xPhospho [S162(100)]	P57776 1xPhospho [T147(0); S162(100)]	6.56e-06	0	2.119	1	1	12	P57776	P57776	Elongation factor 1-delta OS=Mus musculus OX=10090 GN=Eef1d PE=1 SV=3	Eef1d	Eef1d_S162	YES	P57776	P57776 [145-173]	2	3963.81	29	0	0.714	0.854	0.975	-0.49	-0.23	-0.04	0.0159076	0.272378	0.807398	0.16609	0.876988	0.998116	31.29	9.98	8.03	9.47938	8.32778	10.0947	0.38	0.757	0.418	0.714	1.085
1300	High	Unambiguous	YFDNKDDDSDPETANDLPK	[K].YFDNKDDDSDPETANDLPK.[F]	2xTMT6plex [K5; K19]; 1xTMT6plex [N-Term]; 1xPhospho [S9(100)]	2xTMT6plex [K5; K19]; 1xTMT6plex [N-Term]; 1xPhospho [Y1(0); S9(100); T13(0)]	Q99KZ6 1xPhospho [S60(100)]	Q99KZ6 1xPhospho [Y52(0); S60(100); T64(0)]	0.000717544	0	1.182	1	1	6	Q99KZ6	Q99KZ6	Zinc finger protein 639 OS=Mus musculus OX=10090 GN=Znf639 PE=1 SV=1	Znf639	Znf639_S60	YES	Q99KZ6	Q99KZ6 [52-70]	1	2966.39	19	0	0.871	1.159	1.003	-0.2	0.21	0	0.468177	0.30936	0.932986	0.974021	0.897259	0.999462	25.97	16.2	1.76	7.17592	6.82909	7.44626	0.607	0.871	0.609	0.919	1.072
889	High	Unambiguous	KVVDYSQFQESDDADEDYGRDSGPPAK	[R].KVVDYSQFQESDDADEDYGRDSGPPAK.[K]	2xTMT6plex [K1; K27]; 1xTMT6plex [N-Term]; 1xPhospho [S11(100)]	2xTMT6plex [K1; K27]; 1xTMT6plex [N-Term]; 1xPhospho [Y5(0); S6(0); S11(100); Y18(0); S22(0)]	Q80XU3 1xPhospho [S19(100)]	Q80XU3 1xPhospho [Y13(0); S14(0); S19(100); Y26(0); S30(0)]	1e-07	0	2.947	1	1	9	Q80XU3	Q80XU3	Nuclear ubiquitous casein and cyclin-dependent kinase substrate 1 OS=Mus musculus OX=10090 GN=Nucks1 PE=1 SV=1	Nucks1	Nucks1_S19	YES	Q80XU3	Q80XU3 [9-35]	2	3785.78	27	0	1.021	0.961	1.02	0.03	-0.06	0.03	0.856365	0.743677	0.906331	0.999182	0.99264	0.999462	6.47	29.67	54.58	8.6703	7.3156	8.68054	0.181	1.066	0.569	1.053	1.021
484	High	Unambiguous	HSVPVPATELGSTELVTTK	[R].HSVPVPATELGSTELVTTK.[T]	1xTMT6plex [K19]; 1xTMT6plex [N-Term]; 1xPhospho [S/T]	1xTMT6plex [K19]; 1xTMT6plex [N-Term]; 1xPhospho [S2(0); T8(0); S12(50); T13(50); T17(0); T18(0)]	Q9D8D0 1xPhospho [S/T]	Q9D8D0 1xPhospho [S152(0); T158(0); S162(50); T163(50); T167(0); T168(0)]	0.000366345	0	1.319	1	1	6	Q9D8D0	Q9D8D0	Tumor necrosis factor receptor superfamily member 13C OS=Mus musculus OX=10090 GN=Tnfrsf13c PE=1 SV=1	Tnfrsf13c	Tnfrsf13c_T163	YES	Q9D8D0	Q9D8D0 [151-169]	0	2504.34	19	0	0.847	1.004	0.577	-0.24	0.01	-0.79	0.391331	0.888048	0.0409691	0.943091	0.997038	0.278538	8.74	0.6	19.54	6.73877	6.13545	7.85549	0.917	0.776	0.847
4425	High	Unambiguous	FLSHSTDSLNK	[K].FLSHSTDSLNK.[I]	1xTMT6plex [K11]; 1xTMT6plex [N-Term]; 1xPhospho [S5(94.2)]	1xTMT6plex [K11]; 1xTMT6plex [N-Term]; 1xPhospho [S3(0); S5(94.2); T6(5.7); S8(0)]	E9Q394 1xPhospho [S1892(94.2)]	E9Q394 1xPhospho [S1890(0); S1892(94.2); T1893(5.7); S1895(0)]	0.00597097	0.000907142	0.744	1	1	3	E9Q394	E9Q394	A-kinase anchor protein 13 OS=Mus musculus OX=10090 GN=Akap13 PE=1 SV=1	Akap13	Akap13_S1892	YES	E9Q394	E9Q394 [1888-1898]	0	1786.91	11	0	0.754	0.703	0.673	-0.41	-0.51	-0.57	0.084167	0.009781	0.0932008	0.50301	0.167998	0.477783	2.1	9.33	53.1	8.01067	7.1416	8.31877	0.773	0.754	0.708
676	High	Unambiguous	KLSIGQYDNDAASQVTFSK	[R].KLSIGQYDNDAASQVTFSK.[C]	2xTMT6plex [K1; K19]; 1xTMT6plex [N-Term]; 1xPhospho [S3(100)]	2xTMT6plex [K1; K19]; 1xTMT6plex [N-Term]; 1xPhospho [S3(100); Y7(0.1); S13(0); T16(0); S18(0)]	Q5SSZ5 1xPhospho [S769(100)]	Q5SSZ5 1xPhospho [S769(100); Y773(0.1); S779(0); T782(0); S784(0)]	1.39e-08	0	3.338	1	1	9	Q5SSZ5	Q5SSZ5	Tensin-3 OS=Mus musculus OX=10090 GN=Tns3 PE=1 SV=1	Tns3	Tns3_S769	YES	Q5SSZ5	Q5SSZ5 [767-785]	1	2839.48	19	0	0.692	1.034	0.617	-0.53	0.05	-0.7	0.00826884	0.805307	0.0437354	0.101701	0.994856	0.292322	10.5	23.65	26.16	8.77972	7.71218	9.46046	0.503	0.692	0.588	0.712	0.795
349	High	Unambiguous	NVPQEESLEDSDVDADFK	[R].NVPQEESLEDSDVDADFK.[A]	1xTMT6plex [K18]; 1xTMT6plex [N-Term]; 1xPhospho [S11(100)]	1xTMT6plex [K18]; 1xTMT6plex [N-Term]; 1xPhospho [S7(0); S11(100)]	O35344 1xPhospho [S60(100)]	O35344 1xPhospho [S56(0); S60(100)]	4.18e-06	0	2.208	1	1	4	O35344	O35344	Importin subunit alpha-4 OS=Mus musculus OX=10090 GN=Kpna3 PE=1 SV=1	Kpna3	Kpna3_S60	YES	O35344	O35344 [50-67]	0	2575.19	18	0	0.894	1.114	0.879	-0.16	0.16	-0.19	0.585327	0.456101	0.641404	0.98968	0.964357	0.998116	9.1	21.04	48.18	7.08994	6.52546	7.81343	0.619	1.002	0.865		0.923
3564	High	Unambiguous	KGTGDCSDEEVDGKADGADAK	[R].KGTGDCSDEEVDGKADGADAK.[A]	1xCarbamidomethyl [C6]; 3xTMT6plex [K1; K14; K21]; 1xTMT6plex [N-Term]; 1xPhospho [S7(90.5)]	1xCarbamidomethyl [C6]; 3xTMT6plex [K1; K14; K21]; 1xTMT6plex [N-Term]; 1xPhospho [T3(9.5); S7(90.5)]	Q8VDD5 1xPhospho [S1943(90.5)]	Q8VDD5 1xPhospho [T1939(9.5); S1943(90.5)]	0.0028825	0.000530845	0.893	1	1	21	Q8VDD5	Q8VDD5	Myosin-9 OS=Mus musculus OX=10090 GN=Myh9 PE=1 SV=4	Myh9	Myh9_[T1939/S1943]	YES	Q8VDD5	Q8VDD5 [1937-1957]	2	3121.52	21	0	0.863	1.072	0.777	-0.21	0.1	-0.36	0.276873	0.579686	0.21876	0.853885	0.983139	0.754102	10.37	6.84	21.44	10.3641	9.34873	10.8325	0.543	0.944	0.863	0.758	0.897
4708	High	Unambiguous	LGSQHSPGR	[R].LGSQHSPGR.[T]	1xTMT6plex [N-Term]; 1xPhospho [S6(100)]	1xTMT6plex [N-Term]; 1xPhospho [S3(0); S6(100)]	Q8CBW3 1xPhospho [S225(100)]	Q8CBW3 1xPhospho [S222(0); S225(100)]	0.0055961	0.000907142	0.757	1	1	8	Q8CBW3	Q8CBW3	Abl interactor 1 OS=Mus musculus OX=10090 GN=Abi1 PE=1 SV=3	Abi1	Abi1_S225	YES	Q8CBW3	Q8CBW3 [220-228]	0	1247.61	9	0	0.848	1.013	0.956	-0.24	0.02	-0.06	0.271328	0.945958	0.740431	0.846968	0.997187	0.998116	13.39	8.58	41.43	9.35271	8.81698	9.75205	0.848	0.778	0.509	0.954	1.004
3696	High	Unambiguous	VASDTEDTDRITSK	[K].VASDTEDTDRITSK.[K]	1xTMT6plex [K14]; 1xTMT6plex [N-Term]; 1xPhospho [S3(100)]	1xTMT6plex [K14]; 1xTMT6plex [N-Term]; 1xPhospho [S3(100); T5(0); T8(0); T12(0); S13(0)]	Q80TZ9 1xPhospho [S656(100)]	Q80TZ9 1xPhospho [S656(100); T658(0); T661(0); T665(0); S666(0)]	0.00183637	0.000530845	0.987	1	1	6	Q80TZ9	Q80TZ9	Arginine-glutamic acid dipeptide repeats protein OS=Mus musculus OX=10090 GN=Rere PE=1 SV=3	Rere	Rere_S656	YES	Q80TZ9	Q80TZ9 [654-667]	1	2076.03	14	0	0.998	1.013	1.184	0	0.02	0.24	0.992763	0.869378	0.580481	0.99999	0.996046	0.996923	34.22	62.43	83.28	9.61121	8.23506	9.7364	0.136	1.258	0.766	0.998	1.045
3714	High	Unambiguous	AEEPPASPGPK	[R].AEEPPASPGPK.[A]	1xTMT6plex [K11]; 1xTMT6plex [N-Term]; 1xPhospho [S7(100)]	1xTMT6plex [K11]; 1xTMT6plex [N-Term]; 1xPhospho [S7(100)]	Q80T85 1xPhospho [S799(100)]	Q80T85 1xPhospho [S799(100)]	0.00276044	0.000530845	0.902	1	1	4	Q80T85	Q80T85	DDB1- and CUL4-associated factor 5 OS=Mus musculus OX=10090 GN=Dcaf5 PE=1 SV=2	Dcaf5	Dcaf5_S799	YES	Q80T85	Q80T85 [793-803]	0	1617.83	11	0	0.883	1.05	1.166	-0.18	0.07	0.22	0.386086	0.701953	0.592758	0.94111	0.99264	0.996923	8.9	2.43	12.81	9.23745	9.32867	10.1567	0.815	0.883			0.997
3906	High	Unambiguous	KSLSDSESDDSK	[R].KSLSDSESDDSK.[S]	2xTMT6plex [K1; K12]; 1xTMT6plex [N-Term]; 3xPhospho [S2(100); S4(100); S6(99.7)]	2xTMT6plex [K1; K12]; 1xTMT6plex [N-Term]; 3xPhospho [S2(100); S4(100); S6(99.7); S8(0.4); S11(0)]	P23198 3xPhospho [S93(100); S95(100); S97(99.7)]	P23198 3xPhospho [S93(100); S95(100); S97(99.7); S99(0.4); S102(0)]	0.00170076	0.000530845	1.003	1	1	6	P23198	P23198	Chromobox protein homolog 3 OS=Mus musculus OX=10090 GN=Cbx3 PE=1 SV=2	Cbx3	Cbx3_S95;S97;S99	YES	P23198	P23198 [92-103]	1	2224.96	12	0	0.717	0.906	0.985	-0.48	-0.14	-0.02	0.0229634	0.50439	0.842309	0.217051	0.967661	0.998116	12.7	2.76	36.21	9.20457	8.43254	10.0087	0.717	0.836	0.571
911	High	Unambiguous	KVPEQPPELPQLDSQHL	[K].KVPEQPPELPQLDSQHL.[-]	1xTMT6plex [K1]; 1xTMT6plex [N-Term]; 1xPhospho [S14(100)]	1xTMT6plex [K1]; 1xTMT6plex [N-Term]; 1xPhospho [S14(100)]	Q02819 1xPhospho [S456(100)]	Q02819 1xPhospho [S456(100)]	0.000124541	0	1.535	1	1	6	Q02819	Q02819	Nucleobindin-1 OS=Mus musculus OX=10090 GN=Nucb1 PE=1 SV=2	Nucb1	Nucb1_S456	YES	Q02819	Q02819 [443-459]	1	2493.32	17	0	0.762	1.056	0.846	-0.39	0.08	-0.24	0.0984139	0.653669	0.475549	0.548096	0.99264	0.982843	7.46	11.74	28.58	7.50541	6.58646	8.09223	0.735	0.967	0.617	0.762	0.828
3127	High	Unambiguous	DKEVSDDEAEEK	[R].DKEVSDDEAEEK.[E]	2xTMT6plex [K2; K12]; 1xTMT6plex [N-Term]; 1xPhospho [S5(100)]	2xTMT6plex [K2; K12]; 1xTMT6plex [N-Term]; 1xPhospho [S5(100)]	P07901 1xPhospho [S231(100)]	P07901 1xPhospho [S231(100)]	0.00127509	0.000209709	1.063	1	1	3	P07901	P07901	Heat shock protein HSP 90-alpha OS=Mus musculus OX=10090 GN=Hsp90aa1 PE=1 SV=4	Hsp90aa1	Hsp90aa1_S231	YES	P07901	P07901 [227-238]	1	2161.05	12	0	0.697	0.882	0.442	-0.52	-0.18	-1.18	0.0142906	0.355468	0.000332129	0.15299	0.922977	0.00563507	5.92	47.07	10.15	8.73166	8.97126	9.61692	0.697	0.64	0.817
1421	High	Unambiguous	VGGAKPAGGDFGEVLNSTANATSTMTTEPPPEQMTESP	[K].VGGAKPAGGDFGEVLNSTANATSTMTTEPPPEQMTESP.[-]	2xOxidation [M25; M34]; 1xTMT6plex [K5]; 1xTMT6plex [N-Term]; 1xPhospho [S37(84.6)]	2xOxidation [M25; M34]; 1xTMT6plex [K5]; 1xTMT6plex [N-Term]; 1xPhospho [S17(0); T18(0); T22(0); S23(0); T24(0); T26(0); T27(0); T35(15.4); S37(84.6)]	Q62393 1xPhospho [S223(84.6)]	Q62393 1xPhospho [S203(0); T204(0); T208(0); S209(0); T210(0); T212(0); T213(0); T221(15.4); S223(84.6)]	5.36e-07	0	2.615	1	1	5	Q62393	Q62393	Tumor protein D52 OS=Mus musculus OX=10090 GN=Tpd52 PE=1 SV=2	Tpd52	Tpd52_S223	YES	Q62393	Q62393 [187-224]	0	4347.01	38	0	0.939	0.889	1.331	-0.09	-0.17	0.41	0.794901	0.536496	0.330787	0.998955	0.975219	0.905463	11.8	59.36	11.33	6.6279	6.39575	6.95768			0.939	0.852	1.024
3077	High	Unambiguous	KGSITEYTATEEK	[R].KGSITEYTATEEK.[G]	2xTMT6plex [K1; K13]; 1xTMT6plex [N-Term]; 1xPhospho [S3(100)]	2xTMT6plex [K1; K13]; 1xTMT6plex [N-Term]; 1xPhospho [S3(100); T5(0); Y7(0); T8(0); T10(0)]	O54940 1xPhospho [S114(100)]	O54940 1xPhospho [S114(100); T116(0); Y118(0); T119(0); T121(0)]	0.0012508	0.000209709	1.067	1	1	6	O54940	O54940	BCL2/adenovirus E1B 19 kDa protein-interacting protein 2 OS=Mus musculus OX=10090 GN=Bnip2 PE=1 SV=2	Bnip2	Bnip2_S114	YES	O54940	O54940 [112-124]	1	2224.17	13	0	0.853	1.02	0.853	-0.23	0.03	-0.23	0.258848	0.845616	0.403174	0.837622	0.995193	0.949326	20.12	7.6	19.82	8.81651	8.45955	9.54879	0.645	0.976	0.745		1.048
933	High	Unambiguous	TLSDESLCSGR	[R].TLSDESLCSGR.[R]	1xCarbamidomethyl [C8]; 1xTMT6plex [N-Term]; 1xPhospho [S3(100)]	1xCarbamidomethyl [C8]; 1xTMT6plex [N-Term]; 1xPhospho [T1(0); S3(100); S6(0); S9(0)]	G3X9J0 1xPhospho [S1538(100)]	G3X9J0 1xPhospho [T1536(0); S1538(100); S1541(0); S1544(0)]	0.000117251	0	1.547	1	1	5	G3X9J0	G3X9J0	Signal-induced proliferation-associated 1-like protein 3 OS=Mus musculus OX=10090 GN=Sipa1l3 PE=1 SV=1	Sipa1l3	Sipa1l3_S1538	YES	G3X9J0	G3X9J0 [1536-1546]	0	1533.68	11	0	1.076	1.214	1.653	0.11	0.28	0.73	0.607489	0.199344	0.0974756	0.98968	0.803991	0.490475	9.87	5.82	63.66	8.59931	8.15804	8.96172	1.198	1.026	1.129	0.986
741	High	Unambiguous	IIEPDDFLDDLDDEDYEEDTPKRR	[R].IIEPDDFLDDLDDEDYEEDTPKRR.[G]	1xTMT6plex [K22]; 1xTMT6plex [N-Term]; 1xPhospho [T20(99.5)]	1xTMT6plex [K22]; 1xTMT6plex [N-Term]; 1xPhospho [Y16(0.5); T20(99.5)]	Q61103 1xPhospho [T176(99.5)]	Q61103 1xPhospho [Y172(0.5); T176(99.5)]	5.96e-07	0	2.594	1	1	4	Q61103	Q61103	Zinc finger protein ubi-d4 OS=Mus musculus OX=10090 GN=Dpf2 PE=1 SV=1	Dpf2	Dpf2_T176	YES	Q61103	Q61103 [157-180]	2	3491.61	24	0	0.852	0.903	1.371	-0.23	-0.15	0.46	0.491053	0.606118	0.219856	0.979638	0.986653	0.755999	1.72	14.8	55.97	5.89482	5.37504	6.45286	0.47	0.852		0.866
4024	High	Unambiguous	GATPAEDDEDKDIDLFGSDEEEEDKEAAR	[K].GATPAEDDEDKDIDLFGSDEEEEDKEAAR.[L]	2xTMT6plex [K11; K25]; 1xTMT6plex [N-Term]; 2xPhospho [T3(100); S18(100)]	2xTMT6plex [K11; K25]; 1xTMT6plex [N-Term]; 2xPhospho [T3(100); S18(100)]	P57776 2xPhospho [T147(100); S162(100)]	P57776 2xPhospho [T147(100); S162(100)]	0.00234488	0.000530845	0.936	1	1	5	P57776	P57776	Elongation factor 1-delta OS=Mus musculus OX=10090 GN=Eef1d PE=1 SV=3	Eef1d	Eef1d_T147;S162	YES	P57776	P57776 [145-173]	2	4043.78	29	0	0.607	0.913	1.133	-0.72	-0.13	0.18	0.000362245	0.484315	0.731403	0.00842025	0.965376	0.998116	14.93	9.74	34.6	9.30264	8.55804	9.22834	0.434		0.607	0.773
4556	High	Unambiguous	NRTPSDVK	[R].NRTPSDVK.[E]	1xTMT6plex [K8]; 1xTMT6plex [N-Term]; 1xPhospho [T3(100)]	1xTMT6plex [K8]; 1xTMT6plex [N-Term]; 1xPhospho [T3(100); S5(0)]	O35381 1xPhospho [T15(100)]	O35381 1xPhospho [T15(100); S17(0)]	0.00878594	0.000907142	0.668	1	1	6	O35381	O35381	Acidic leucine-rich nuclear phosphoprotein 32 family member A OS=Mus musculus OX=10090 GN=Anp32a PE=1 SV=1	Anp32a	Anp32a_T15	YES	O35381	O35381 [13-20]	1	1454.78	8	0	0.835	0.985	1.025	-0.26	-0.02	0.04	0.20495	0.924128	0.97869	0.777859	0.997187	0.999899	17.5	19.71	12.66	9.87515	9.6858	10.2123	0.68	0.979	0.716		0.973
4003	High	Unambiguous	LCDFGSASHVADNDITPYLVSR	[K].LCDFGSASHVADNDITPYLVSR.[F]	1xCarbamidomethyl [C2]; 1xTMT6plex [N-Term]; 1xPhospho [Y18(90.4)]	1xCarbamidomethyl [C2]; 1xTMT6plex [N-Term]; 1xPhospho [S6(0); S8(0); T16(8.7); Y18(90.4); S21(0.9)]	Q61136 1xPhospho [Y849(90.4)]	Q61136 1xPhospho [S837(0); S839(0); T847(8.7); Y849(90.4); S852(0.9)]	0.0027079	0.000530845	0.906	1	1	3	Q61136	Q61136	Serine/threonine-protein kinase PRP4 homolog OS=Mus musculus OX=10090 GN=Prpf4b PE=1 SV=3	Prpf4b	Prpf4b_Y849	YES	Q61136	Q61136 [832-853]	0	2746.27	22	0	0.799	0.86	0.727	-0.32	-0.22	-0.46	0.333688	0.499341	0.167594	0.900166	0.965376	0.664864	0.05	1.9	27.01	5.18982	4.67807	6.26866	0.811		0.799		0.799
3416	High	Unambiguous	RKSLSDSESDDSK	[K].RKSLSDSESDDSK.[S]	2xTMT6plex [K2; K13]; 1xTMT6plex [N-Term]; 2xPhospho [S3(100); S5(95)]	2xTMT6plex [K2; K13]; 1xTMT6plex [N-Term]; 2xPhospho [S3(100); S5(95); S7(5); S9(0); S12(0)]	P23198 2xPhospho [S93(100); S95(95)]	P23198 2xPhospho [S93(100); S95(95); S97(5); S99(0); S102(0)]	0.00141726	0.000404169	1.041	1	1	7	P23198	P23198	Chromobox protein homolog 3 OS=Mus musculus OX=10090 GN=Cbx3 PE=1 SV=2	Cbx3	Cbx3_S93;S95	YES	P23198	P23198 [91-103]	2	2301.1	13	0	0.826	1.198	1.07	-0.27	0.26	0.1	0.165437	0.136781	0.873807	0.714975	0.715042	0.998362	10.52	1.03	5.48	10.8531	9.68982	10.9038		0.826		0.741	1.08
2245	High	Unambiguous	ETTGSESDGGDSSSTK	[R].ETTGSESDGGDSSSTK.[S]	1xTMT6plex [K16]; 1xTMT6plex [N-Term]; 1xPhospho [S7(100)]	1xTMT6plex [K16]; 1xTMT6plex [N-Term]; 1xPhospho [T2(0); T3(0); S5(0); S7(100); S12(0); S13(0); S14(0); T15(0)]	Q8R550 1xPhospho [S227(100)]	Q8R550 1xPhospho [T222(0); T223(0); S225(0); S227(100); S232(0); S233(0); S234(0); T235(0)]	6.76e-09	0	3.481	1	1	16	Q8R550	Q8R550	SH3 domain-containing kinase-binding protein 1 OS=Mus musculus OX=10090 GN=Sh3kbp1 PE=1 SV=1	Sh3kbp1	Sh3kbp1_S227	YES	Q8R550	Q8R550 [221-236]	0	2082.91	16	0	0.83	1.097	0.812	-0.27	0.13	-0.3	0.173482	0.473192	0.298297	0.728498	0.965165	0.869794	7.41	17.66	35.03	9.98426	9.20821	10.3011	0.833	0.828	0.712		0.962
580	High	Unambiguous	GTGDCSDEEVDGKADGADAK	[K].GTGDCSDEEVDGKADGADAK.[A]	1xCarbamidomethyl [C5]; 2xTMT6plex [K13; K20]; 1xTMT6plex [N-Term]; 1xPhospho [S6(100)]	1xCarbamidomethyl [C5]; 2xTMT6plex [K13; K20]; 1xTMT6plex [N-Term]; 1xPhospho [T2(0); S6(100)]	Q8VDD5 1xPhospho [S1943(100)]	Q8VDD5 1xPhospho [T1939(0); S1943(100)]	0.000137704	0	1.515	1	1	19	Q8VDD5	Q8VDD5	Myosin-9 OS=Mus musculus OX=10090 GN=Myh9 PE=1 SV=4	Myh9	Myh9_S1943	YES	Q8VDD5	Q8VDD5 [1938-1957]	1	2764.26	20	0	0.855	0.998	0.937	-0.23	0	-0.09	0.254027	0.995036	0.677701	0.833335	0.999874	0.998116	7.91	4.84	23.08	9.94328	9.29216	10.4886	0.563	0.895		0.816	0.939
4490	High	Unambiguous	TQSCETK	[R].TQSCETK.[L]	1xCarbamidomethyl [C4]; 1xTMT6plex [K7]; 1xTMT6plex [N-Term]; 1xPhospho [S3(100)]	1xCarbamidomethyl [C4]; 1xTMT6plex [K7]; 1xTMT6plex [N-Term]; 1xPhospho [T1(0); S3(100); T6(0)]	O54824 1xPhospho [S967(99.8)]	O54824 1xPhospho [T965(0.2); S967(99.8); T970(0)]	0.00585282	0.000907142	0.748	1	1	4	O54824	O54824	Pro-interleukin-16 OS=Mus musculus OX=10090 GN=Il16 PE=1 SV=3	Il16	Il16_S967	YES	O54824	O54824 [965-971]	0	1391.66	7	0	0.703	1.113	0.505	-0.51	0.15	-0.98	0.0121085	0.37475	0.00192125	0.135983	0.929394	0.0252403	9.96	13.07	17.77	10.6757	9.58628	11.4005	0.607	0.816	0.703
1702	High	Unambiguous	RQSLEVAAPEGPK	[R].RQSLEVAAPEGPK.[M]	1xTMT6plex [K13]; 1xTMT6plex [N-Term]; 1xPhospho [S3(100)]	1xTMT6plex [K13]; 1xTMT6plex [N-Term]; 1xPhospho [S3(100)]	Q8VDI1 1xPhospho [S39(100)]	Q8VDI1 1xPhospho [S39(100)]	1.19e-07	0	2.913	1	1	6	Q8VDI1	Q8VDI1	Epithelial-stromal interaction protein 1 OS=Mus musculus OX=10090 GN=Epsti1 PE=1 SV=2	Epsti1	Epsti1_S39	YES	Q8VDI1	Q8VDI1 [37-49]	1	1920.04	13	0	0.738	1.197	0.877	-0.44	0.26	-0.19	0.0260828	0.174438	0.584866	0.235738	0.779486	0.996923	5.94	31.51	43.89	8.65284	7.36632	9.08188	0.663	1.092	0.683	0.738	0.776
1842	High	Unambiguous	SSFSNSADDIK	[K].SSFSNSADDIK.[S]	1xTMT6plex [K11]; 1xTMT6plex [N-Term]; 1xPhospho [S2(99.7)]	1xTMT6plex [K11]; 1xTMT6plex [N-Term]; 1xPhospho [S1(0.3); S2(99.7); S4(0); S6(0)]	Q61686 1xPhospho [S93(99.7)]	Q61686 1xPhospho [S92(0.3); S93(99.7); S95(0); S97(0)]	0.000106569	0	1.566	1	1	4	Q61686	Q61686	Chromobox protein homolog 5 OS=Mus musculus OX=10090 GN=Cbx5 PE=1 SV=1	Cbx5	Cbx5_S93	YES	Q61686	Q61686 [92-102]	0	1708.82	11	0	0.81	1.129	0.994	-0.3	0.18	-0.01	0.142408	0.411826	0.841081	0.668588	0.943142	0.998116	10.75	33.23	5.07	8.8623	7.8834	9.24466	0.455	0.888	0.74		0.912
376	High	Unambiguous	NSPGLLVSPGNLNK	[R].NSPGLLVSPGNLNK.[N]	1xTMT6plex [K14]; 1xTMT6plex [N-Term]; 1xPhospho [S2(100)]	1xTMT6plex [K14]; 1xTMT6plex [N-Term]; 1xPhospho [S2(100); S8(0)]	Q8CFN5 1xPhospho [S222(100)]	Q8CFN5 1xPhospho [S222(100); S228(0)]	1.81e-05	0	1.918	1	1	9	Q8CFN5	Q8CFN5	Myocyte-specific enhancer factor 2C OS=Mus musculus OX=10090 GN=Mef2c PE=1 SV=2	Mef2c	Mef2c_S222	YES	Q8CFN5	Q8CFN5 [221-234]	0	1948.07	14	0	0.833	0.88	0.953	-0.26	-0.18	-0.07	0.282033	0.351235	0.769293	0.859614	0.922977	0.998116	13.39	17.99	54.56	7.99039	7.19967	8.56071	1.079	0.942	0.833	0.646	0.784
289	High	Unambiguous	RAQSTDSLGTSSSLQSK	[R].RAQSTDSLGTSSSLQSK.[A]	1xTMT6plex [K17]; 1xTMT6plex [N-Term]; 2xPhospho [S4(99.5); S7(100)]	1xTMT6plex [K17]; 1xTMT6plex [N-Term]; 2xPhospho [S4(99.5); T5(0.5); S7(100); T10(0); S11(0); S12(0); S13(0); S16(0)]	O35551 2xPhospho [S407(99.5); S410(100)]	O35551 2xPhospho [S407(99.5); T408(0.5); S410(100); T413(0); S414(0); S415(0); S416(0); S419(0)]	0.000629136	0	1.209	1	1	3	O35551	O35551	Rab GTPase-binding effector protein 1 OS=Mus musculus OX=10090 GN=Rabep1 PE=1 SV=2	Rabep1	Rabep1_S407;S410	YES	O35551	O35551 [404-420]	1	2371.13	17	0	0.69	1.047	0.797	-0.53	0.07	-0.33	0.00771928	0.774865	0.297459	0.0968222	0.99264	0.868609	22.54	27.82	13.73	8.80703	8.13494	9.23673	0.463		0.69	0.91
1637	High	Unambiguous	RKPSPSPPPPTATESR	[K].RKPSPSPPPPTATESR.[K]	1xTMT6plex [K2]; 1xTMT6plex [N-Term]; 2xPhospho [S4(100); S6(100)]	1xTMT6plex [K2]; 1xTMT6plex [N-Term]; 2xPhospho [S4(100); S6(100); T11(0); T13(0); S15(0)]	P97496 2xPhospho [S327(100); S329(100)]	P97496 2xPhospho [S327(100); S329(100); T334(0); T336(0); S338(0)]	0.000414533	0	1.294	1	1	9	P97496	P97496	SWI/SNF complex subunit SMARCC1 OS=Mus musculus OX=10090 GN=Smarcc1 PE=1 SV=2	Smarcc1	Smarcc1_S327;S329	YES	P97496	P97496 [324-339]	1	2323.16	16	0	0.809	0.935	1.006	-0.31	-0.1	0.01	0.169118	0.676491	0.888721	0.721768	0.99264	0.99921	2.58	2.72	38.47	9.00478	8.18686	9.69714	0.76	0.825	0.788	0.866	0.809
2304	High	Unambiguous	EKEISDDEAEEEK	[R].EKEISDDEAEEEK.[G]	2xTMT6plex [K2; K13]; 1xTMT6plex [N-Term]; 1xPhospho [S5(100)]	2xTMT6plex [K2; K13]; 1xTMT6plex [N-Term]; 1xPhospho [S5(100)]	P11499 1xPhospho [S226(100)]	P11499 1xPhospho [S226(100)]	0.000298919	0	1.36	1	1	4	P11499	P11499	Heat shock protein HSP 90-beta OS=Mus musculus OX=10090 GN=Hsp90ab1 PE=1 SV=3	Hsp90ab1	Hsp90ab1_S226	YES	P11499	P11499 [222-234]	1	2318.13	13	0	0.718	0.877	0.564	-0.48	-0.19	-0.83	0.0369637	0.365942	0.0331416	0.300172	0.926113	0.237528	2.4	20.57	18.74	8.19279	8.37112	9.09091	0.718	0.741	0.617
2562	High	Unambiguous	ATTAQQSPQPVAGK	[M].ATTAQQSPQPVAGK.[R]	1xAcetyl [N-Term]; 1xTMT6plex [K14]; 1xTMT6plex [N-Term]; 1xPhospho [S7(100)]	1xAcetyl [N-Term]; 1xTMT6plex [K14]; 1xTMT6plex [N-Term]; 1xPhospho [T2(0); T3(0); S7(100)]	Q99J36 1xAcetyl [N-Term]; 1xPhospho [S8(100)]	Q99J36 1xAcetyl [N-Term]; 1xPhospho [T3(0); T4(0); S8(100)]	0.000177851	0	1.464	1	1	7	Q99J36	Q99J36	THUMP domain-containing protein 1 OS=Mus musculus OX=10090 GN=Thumpd1 PE=1 SV=1	Thumpd1	Thumpd1_S8	YES	Q99J36	Q99J36 [2-15]	0	1964.03	14	0	0.948	0.967	1.012	-0.08	-0.05	0.02	0.662129	0.896674	0.944367	0.98968	0.997038	0.999899	17.01	13.91	40.97	8.44648	7.83555	8.91277	0.731	1.178	0.923		0.973
820	High	Unambiguous	KSPVFSDEDSDLDFDIGKLEQQTK	[R].KSPVFSDEDSDLDFDIGKLEQQTK.[M]	3xTMT6plex [K1; K18; K24]; 1xTMT6plex [N-Term]; 3xPhospho [S2(100); S6(100); S10(100)]	3xTMT6plex [K1; K18; K24]; 1xTMT6plex [N-Term]; 3xPhospho [S2(100); S6(100); S10(100); T23(0)]	Q810V0 3xPhospho [S164(100); S168(100); S172(100)]	Q810V0 3xPhospho [S164(100); S168(100); S172(100); T185(0)]	6.89e-06	0	2.109	1	1	6	Q810V0	Q810V0	U3 small nucleolar ribonucleoprotein protein MPP10 OS=Mus musculus OX=10090 GN=Mphosph10 PE=1 SV=2	Mphosph10	Mphosph10_S164;S168;S172	YES	Q810V0	Q810V0 [163-186]	2	3897.87	24	0	1.085	1.405	5.355	0.12	0.49	2.42	0.584854	0.00377727	7.85e-13	0.98968	0.0844961	5.53e-11	30.11	23.13	117.07	9.80945	9.75087	10.138	0.471	1.305	1.085
1070	High	Unambiguous	SVDIFGSTPFQPFSVSASK	[R].SVDIFGSTPFQPFSVSASK.[S]	1xTMT6plex [K19]; 1xTMT6plex [N-Term]; 1xPhospho [S1(100)]	1xTMT6plex [K19]; 1xTMT6plex [N-Term]; 1xPhospho [S1(100); S7(0); T8(0); S14(0); S16(0); S18(0)]	Q91Z96 1xPhospho [S908(100)]	Q91Z96 1xPhospho [S908(100); S914(0); T915(0); S921(0); S923(0); S925(0)]	3.28e-05	0	1.8	1	1	3	Q91Z96	Q91Z96	BMP-2-inducible protein kinase OS=Mus musculus OX=10090 GN=Bmp2k PE=1 SV=1	Bmp2k	Bmp2k_S908	YES	Q91Z96	Q91Z96 [908-926]	0	2539.29	19	0	0.883	1.278	1.617	-0.18	0.35	0.69	0.694718	0.316683	0.150201	0.98968	0.903624	0.623868	10.91	57.13	11.51	4.63807	4.62644	5.21335	0.396		0.883	0.967
3937	High	Unambiguous	LGTGGGGSPDKSPSAQELK	[R].LGTGGGGSPDKSPSAQELK.[E]	2xTMT6plex [K11; K19]; 1xTMT6plex [N-Term]; 1xPhospho [S8(100)]	2xTMT6plex [K11; K19]; 1xTMT6plex [N-Term]; 1xPhospho [T3(0); S8(100); S12(0); S14(0)]	Q9WUD1 1xPhospho [S20(100)]	Q9WUD1 1xPhospho [T15(0); S20(100); S24(0); S26(0)]	0.00247189	0.000530845	0.925	1	1	5	Q9WUD1	Q9WUD1	STIP1 homology and U box-containing protein 1 OS=Mus musculus OX=10090 GN=Stub1 PE=1 SV=1	Stub1	Stub1_S20	YES	Q9WUD1	Q9WUD1 [13-31]	1	2553.35	19	0	0.995	1.092	0.877	-0.01	0.13	-0.19	0.996695	0.471387	0.486755	0.99999	0.965165	0.984677	13.44	25.15	24.85	8.90509	8.50978	9.48784	0.654	0.904	1.017	0.995	1.093
5858	High	Unambiguous	SLSYSPVER	[R].SLSYSPVER.[R]	1xTMT6plex [N-Term]; 1xPhospho [S/Y]	1xTMT6plex [N-Term]; 1xPhospho [S1(0); S3(33.3); Y4(33.3); S5(33.3)]	Q8BTI8 1xPhospho [S/Y]	Q8BTI8 1xPhospho [S2644(0); S2646(33.3); Y2647(33.3); S2648(33.3)]	0.0416637	0.00399884	0.378	1	1	4	Q8BTI8	Q8BTI8	Serine/arginine repetitive matrix protein 2 OS=Mus musculus OX=10090 GN=Srrm2 PE=1 SV=3	Srrm2	Srrm2_S2646	YES	Q8BTI8	Q8BTI8 [2644-2652]	0	1346.66	9	0	0.81	0.826	0.804	-0.3	-0.28	-0.31	0.126161	0.234324	0.329021	0.626854	0.845167	0.902731	22.56	29.1	2.35	8.43254	8.03617	9.19722	0.81	0.998	0.338
3760	High	Unambiguous	SGEDEQQEQTIAEDLVVTK	[M].SGEDEQQEQTIAEDLVVTK.[Y]	1xAcetyl [N-Term]; 1xTMT6plex [K19]; 1xTMT6plex [N-Term]; 1xPhospho [S1(100)]	1xAcetyl [N-Term]; 1xTMT6plex [K19]; 1xTMT6plex [N-Term]; 1xPhospho [S1(100); T10(0); T18(0)]	P50580 1xAcetyl [N-Term]; 1xPhospho [S2(100)]	P50580 1xAcetyl [N-Term]; 1xPhospho [S2(100); T11(0); T19(0)]	0.0023114	0.000530845	0.939	1	1	18	P50580	P50580	Proliferation-associated protein 2G4 OS=Mus musculus OX=10090 GN=Pa2g4 PE=1 SV=3	Pa2g4	Pa2g4_S2	YES	P50580	P50580 [2-20]	0	2699.31	19	0	0.827	0.992	0.737	-0.27	-0.01	-0.44	0.315452	0.938059	0.205684	0.890526	0.997187	0.73676	6.28	20.29	10.58	6.50564	5.93897	7.18312	0.759	0.861	1.133		0.794
3624	High	Unambiguous	TKPPRPDSPTTTPNISVK	[K].TKPPRPDSPTTTPNISVK.[K]	2xTMT6plex [K2; K18]; 1xTMT6plex [N-Term]; 1xPhospho [S8(99.9)]	2xTMT6plex [K2; K18]; 1xTMT6plex [N-Term]; 1xPhospho [T1(0); S8(99.9); T10(0.1); T11(0); T12(0); S16(0)]	Q60775 1xPhospho [S187(99.9)]	Q60775 1xPhospho [T180(0); S187(99.9); T189(0.1); T190(0); T191(0); S195(0)]	0.00185406	0.000530845	0.985	1	1	3	Q60775	Q60775	ETS-related transcription factor Elf-1 OS=Mus musculus OX=10090 GN=Elf1 PE=1 SV=1	Elf1	Elf1_S187	YES	Q60775	Q60775 [180-197]	0	2703.5	18	0	0.838	1.006	0.995	-0.26	0.01	-0.01	0.296401	0.898371	0.845584	0.87493	0.997038	0.998116	16.32	11.82	13.69	7.94544	7.83416	8.2555	0.838		0.707		1.072
4562	High	Unambiguous	NSATFKSFEDR	[R].NSATFKSFEDR.[V]	1xTMT6plex [K6]; 1xTMT6plex [N-Term]; 1xPhospho [S7(100)]	1xTMT6plex [K6]; 1xTMT6plex [N-Term]; 1xPhospho [S2(0); T4(0); S7(100)]	Q9CYZ2 1xPhospho [S180(100)]	Q9CYZ2 1xPhospho [S175(0); T177(0); S180(100)]	0.00817482	0.000907142	0.682	1	1	4	Q9CYZ2	Q9CYZ2	Tumor protein D54 OS=Mus musculus OX=10090 GN=Tpd52l2 PE=1 SV=1	Tpd52l2	Tpd52l2_S180	YES	Q9CYZ2	Q9CYZ2 [174-184]	1	1839.9	11	0	0.891	1.266	1.137	-0.17	0.34	0.19	0.440161	0.0767497	0.670091	0.968069	0.571375	0.998116	9.96	10.06	2.73	9.83794	9.34385	10.2289	0.816			0.891	1.062
3793	High	Unambiguous	SGVAVPTSPK	[R].SGVAVPTSPK.[G]	1xTMT6plex [K10]; 1xTMT6plex [N-Term]; 1xPhospho [S8(99.9)]	1xTMT6plex [K10]; 1xTMT6plex [N-Term]; 1xPhospho [S1(0); T7(0.1); S8(99.9)]	Q61823 1xPhospho [S94(99.9)]	Q61823 1xPhospho [S87(0); T93(0.1); S94(99.9)]	0.00195444	0.000530845	0.974	1	1	11	Q61823	Q61823	Programmed cell death protein 4 OS=Mus musculus OX=10090 GN=Pdcd4 PE=1 SV=1	Pdcd4	Pdcd4_S94	YES	Q61823	Q61823 [87-96]	0	1480.82	10	0	0.875	1.005	0.626	-0.19	0.01	-0.68	0.320107	0.961789	0.0298376	0.896487	0.998574	0.220404	0.97	9.6	25.99	9.91632	9.06848	10.7074	0.882	0.867	0.867		1.021
683	High	Unambiguous	LFDDSDERGTVGNVK	[K].LFDDSDERGTVGNVK.[E]	1xTMT6plex [K15]; 1xTMT6plex [N-Term]; 1xPhospho [S5(100)]	1xTMT6plex [K15]; 1xTMT6plex [N-Term]; 1xPhospho [S5(100); T10(0)]	Q8BGC0 1xPhospho [S724(100)]	Q8BGC0 1xPhospho [S724(100); T729(0)]	0.000466584	0	1.27	1	1	3	Q8BGC0	Q8BGC0	HIV Tat-specific factor 1 homolog OS=Mus musculus OX=10090 GN=Htatsf1 PE=1 SV=1	Htatsf1	Htatsf1_S724	YES	Q8BGC0	Q8BGC0 [720-734]	1	2190.08	15	0	1.057	0.762	1.342	0.08	-0.39	0.42	0.713764	0.052384	0.252207	0.989834	0.465153	0.817145	60.76	11.15	41.93	9.63209	9.09777	10.3548	1.846	1.057	0.624
2900	High	Unambiguous	GPASVEGALDLSDGHPPSKSPEGK	[K].GPASVEGALDLSDGHPPSKSPEGK.[S]	2xTMT6plex [K19; K24]; 1xTMT6plex [N-Term]; 1xPhospho [S20(89.6)]	2xTMT6plex [K19; K24]; 1xTMT6plex [N-Term]; 1xPhospho [S4(0); S12(0); S18(10.4); S20(89.6)]	Q66JX5 1xPhospho [S160(89.6)]	Q66JX5 1xPhospho [S144(0); S152(0); S158(10.4); S160(89.6)]	3.94e-06	0	2.22	1	1	5	Q66JX5	Q66JX5	FGFR1 oncogene partner OS=Mus musculus OX=10090 GN=Fgfr1op PE=1 SV=1	Fgfr1op	Fgfr1op_S160	YES	Q66JX5	Q66JX5 [141-164]	1	3099.6	24	0	0.783	1.025	1.111	-0.35	0.03	0.15	0.151929	0.836086	0.74956	0.683598	0.995193	0.998116	0.8	2.46	1.25	7.68159	7.69	8.02126	0.783	0.757	0.79
4220	High	Unambiguous	GKLQEEGGSEEEEAGNPSEDGMQSGPTQAPPR	[K].GKLQEEGGSEEEEAGNPSEDGMQSGPTQAPPR.[E]	1xOxidation [M22]; 1xTMT6plex [K2]; 1xTMT6plex [N-Term]; 1xPhospho [S9(96.7)]	1xOxidation [M22]; 1xTMT6plex [K2]; 1xTMT6plex [N-Term]; 1xPhospho [S9(96.7); S18(3.3); S24(0); T27(0)]	Q99LL5 1xPhospho [S49(96.7)]	Q99LL5 1xPhospho [S49(96.7); S58(3.3); S64(0); T67(0)]	0.00339597	0.000677187	0.859	1	1	4	Q99LL5	Q99LL5	Periodic tryptophan protein 1 homolog OS=Mus musculus OX=10090 GN=Pwp1 PE=1 SV=1	Pwp1	Pwp1_S49	YES	Q99LL5	Q99LL5 [41-72]	1	3852.73	32	0	1.013	0.787	0.968	0.02	-0.35	-0.05	0.793248	0.176477	0.896838	0.998955	0.781459	0.999275	5.25	7.47	3.92	7.10014	6.38888	7.59395	0.635	1.049			1.013
1539	High	Unambiguous	SEAAPAAPAAAPPAEK	[M].SEAAPAAPAAAPPAEK.[A]	1xAcetyl [N-Term]; 1xTMT6plex [K16]; 1xTMT6plex [N-Term]; 1xPhospho [S1(100)]	1xAcetyl [N-Term]; 1xTMT6plex [K16]; 1xTMT6plex [N-Term]; 1xPhospho [S1(100)]	P15864 1xAcetyl [N-Term]; 1xPhospho [S2(100)]	P15864 1xAcetyl [N-Term]; 1xPhospho [S2(100)]	0.000243708	0	1.401	1	1	9	P15864	P15864	Histone H1.2 OS=Mus musculus OX=10090 GN=Hist1h1c PE=1 SV=2	Hist1h1c	Hist1h1c_S2	YES	P15864	P15864 [2-17]	0	2029.04	16	0	0.884	0.857	0.779	-0.18	-0.22	-0.36	0.509418	0.36958	0.346129	0.979989	0.927882	0.916201	3.92	11.25	4.36	7.44636	6.70737	7.85185	0.676	0.919	0.86		0.91
2741	High	Unambiguous	ASEPVKEPVQTAQSPAPVEK	[K].ASEPVKEPVQTAQSPAPVEK.[E]	2xTMT6plex [K6; K20]; 1xTMT6plex [N-Term]; 1xPhospho [S14(100)]	2xTMT6plex [K6; K20]; 1xTMT6plex [N-Term]; 1xPhospho [S2(0); T11(0); S14(100)]	Q6DID3 1xPhospho [S617(100)]	Q6DID3 1xPhospho [S605(0); T614(0); S617(100)]	1.21e-05	0	1.998	1	1	5	Q6DID3	Q6DID3	Protein SCAF8 OS=Mus musculus OX=10090 GN=Scaf8 PE=1 SV=1	Scaf8	Scaf8_S617	YES	Q6DID3	Q6DID3 [604-623]	1	2859.55	20	0	0.912	0.829	0.918	-0.13	-0.27	-0.12	0.512156	0.256248	0.606444	0.980039	0.859695	0.996923	9.53	4.36	26.71	8.65151	7.79604	9.2809	0.787	1.069	0.896		0.928
1636	High	Unambiguous	RKSLSDSESDDSK	[K].RKSLSDSESDDSK.[S]	2xTMT6plex [K2; K13]; 1xTMT6plex [N-Term]; 1xPhospho [S3(93.5)]	2xTMT6plex [K2; K13]; 1xTMT6plex [N-Term]; 1xPhospho [S3(93.5); S5(6.4); S7(0); S9(0); S12(0)]	P23198 1xPhospho [S93(93.5)]	P23198 1xPhospho [S93(93.5); S95(6.4); S97(0); S99(0); S102(0)]	0.000153013	0	1.494	1	1	6	P23198	P23198	Chromobox protein homolog 3 OS=Mus musculus OX=10090 GN=Cbx3 PE=1 SV=2	Cbx3	Cbx3_S93	YES	P23198	P23198 [91-103]	2	2221.13	13	0	0.943	0.952	1.436	-0.09	-0.07	0.52	0.689147	0.755674	0.222872	0.98968	0.99264	0.761713	11.62	0.13	15.95	9.25998	8.63118	9.36632	1.026	0.943	0.642
486	High	Unambiguous	KADSDSEDKGEESKPK	[R].KADSDSEDKGEESKPK.[K]	4xTMT6plex [K1; K9; K14; K16]; 1xTMT6plex [N-Term]; 1xPhospho [S4(100)]	4xTMT6plex [K1; K9; K14; K16]; 1xTMT6plex [N-Term]; 1xPhospho [S4(100); S6(0); S13(0)]	P83917 1xPhospho [S89(100)]	P83917 1xPhospho [S89(100); S91(0); S98(0)]	0.000291578	0	1.365	1	1	7	P83917	P83917	Chromobox protein homolog 1 OS=Mus musculus OX=10090 GN=Cbx1 PE=1 SV=1	Cbx1	Cbx1_S89	YES	P83917	P83917 [86-101]	2	2975.59	16	0	0.665	1.047	0.962	-0.59	0.07	-0.06	0.0039405	0.724078	0.76265	0.0583855	0.99264	0.998116	2.4	5.02	46.44	10.1121	9.27525	10.638	0.667	0.869	0.663	0.618
2765	High	Unambiguous	FSAVLVEPPPLNLPSAGLSSQELSGPGDGP	[K].FSAVLVEPPPLNLPSAGLSSQELSGPGDGP.[-]	1xTMT6plex [N-Term]; 1xPhospho [S]	1xTMT6plex [N-Term]; 1xPhospho [S2(0); S15(6.7); S19(46.7); S20(46.7); S24(0)]	Q62318 1xPhospho [S]	Q62318 1xPhospho [S806(0); S819(6.7); S823(46.7); S824(46.7); S828(0)]	0.000530149	0	1.244	1	1	11	Q62318	Q62318	Transcription intermediary factor 1-beta OS=Mus musculus OX=10090 GN=Trim28 PE=1 SV=3	Trim28	Trim28_[S823/S824]	YES	Q62318	Q62318 [805-834]	0	3241.62	30	0	0.242	0.19	0.647	-2.05	-2.4	-0.63	1e-17	1e-17	0.158867	1.52e-15	2.82e-15	0.643805	2.33	0.69	12.72	6.54689	6.52356	5.37851	0.177		0.387		0.242
1082	High	Unambiguous	STSQGSINSPVYSR	[R].STSQGSINSPVYSR.[H]	1xTMT6plex [N-Term]; 1xPhospho [S3(93.8)]	1xTMT6plex [N-Term]; 1xPhospho [S1(0); T2(5.8); S3(93.8); S6(0.4); S9(0); Y12(0); S13(0)]	Q8K4G5 1xPhospho [S496(93.8)]	Q8K4G5 1xPhospho [S494(0); T495(5.8); S496(93.8); S499(0.4); S502(0); Y505(0); S506(0)]	1.1e-06	0	2.473	1	1	13	Q8K4G5	Q8K4G5	Actin-binding LIM protein 1 OS=Mus musculus OX=10090 GN=Ablim1 PE=1 SV=1	Ablim1	Ablim1_S496	YES	Q8K4G5	Q8K4G5 [494-507]	0	1791.85	14	0	0.96	1.151	1.171	-0.06	0.2	0.23	0.799824	0.402681	0.648923	0.998955	0.940545	0.998116	18.99	31.52	48.71	8.88539	8.09487	9.05745	0.878	0.96	0.589	1.094	1.271
4981	High	Unambiguous	VSSSPGIK	[R].VSSSPGIK.[G]	1xTMT6plex [K8]; 1xTMT6plex [N-Term]; 1xPhospho [S]	1xTMT6plex [K8]; 1xTMT6plex [N-Term]; 1xPhospho [S2(2.2); S3(48.9); S4(48.9)]	Q60775 1xPhospho [S]	Q60775 1xPhospho [S332(2.2); S333(48.9); S334(48.9)]	0.0106497	0.00131309	0.631	1	1	8	Q60775	Q60775	ETS-related transcription factor Elf-1 OS=Mus musculus OX=10090 GN=Elf1 PE=1 SV=1	Elf1	Elf1_S334	YES	Q60775	Q60775 [331-338]	0	1312.73	8	0	0.885	0.929	0.932	-0.18	-0.11	-0.1	0.362425	0.521722	0.661083	0.921043	0.971331	0.998116	14.42	7.9	17.95	10.2288	9.94097	10.7443	0.788	0.995	0.609		0.996
91	High	Unambiguous	LQESPAPEKGEVLGDALQLDTLK	[R].LQESPAPEKGEVLGDALQLDTLK.[Q]	2xTMT6plex [K9; K23]; 1xTMT6plex [N-Term]; 1xPhospho [S4(100)]	2xTMT6plex [K9; K23]; 1xTMT6plex [N-Term]; 1xPhospho [S4(100); T21(0)]	E9Q7G0 1xPhospho [S398(100)]	E9Q7G0 1xPhospho [S398(100); T415(0)]	0.000396512	0	1.303	1	1	4	E9Q7G0	E9Q7G0	Nuclear mitotic apparatus protein 1 OS=Mus musculus OX=10090 GN=Numa1 PE=1 SV=1	Numa1	Numa1_S398	YES	E9Q7G0	E9Q7G0 [395-417]	1	3218.75	23	0	0.847	0.73	0.52	-0.24	-0.45	-0.94	0.305074	0.0311904	0.0160724	0.880965	0.346605	0.139996	14.52	17.8	26.1	7.37069	6.80735	7.96116	0.599		0.963		0.847
608	High	Unambiguous	GSVSDEEMMELR	[R].GSVSDEEMMELR.[E]	2xOxidation [M8; M9]; 1xTMT6plex [N-Term]; 1xPhospho [S2(100)]	2xOxidation [M8; M9]; 1xTMT6plex [N-Term]; 1xPhospho [S2(100); S4(0)]	Q61233 1xPhospho [S5(100)]	Q61233 1xPhospho [S5(100); S7(0)]	1.53e-05	0	1.951	1	1	6	Q61233	Q61233	Plastin-2 OS=Mus musculus OX=10090 GN=Lcp1 PE=1 SV=4	Lcp1	Lcp1_S5	NO	Q61233	Q61233 [4-15]	0	1723.71	12	0	1.153	1.116	1.684	0.2	0.16	0.75	0.280833	0.377755	0.0432252	0.858044	0.931641	0.29043	6.23	25.25	5.12	9.39938	9.46597	9.88463	1.104	1.153			1.36
1550	High	Unambiguous	SETAPAAPAAPAPVEK	[M].SETAPAAPAAPAPVEK.[T]	1xAcetyl [N-Term]; 1xTMT6plex [K16]; 1xTMT6plex [N-Term]; 1xPhospho [S1(98.9)]	1xAcetyl [N-Term]; 1xTMT6plex [K16]; 1xTMT6plex [N-Term]; 1xPhospho [S1(98.9); T3(1.1)]	P43277 1xAcetyl [N-Term]; 1xPhospho [S2(98.9)]	P43277 1xAcetyl [N-Term]; 1xPhospho [S2(98.9); T4(1.1)]	0.000153783	0	1.493	1	1	10	P43277	P43277	Histone H1.3 OS=Mus musculus OX=10090 GN=Hist1h1d PE=1 SV=2	Hist1h1d	Hist1h1d_[S2/T4]	YES	P43277	P43277 [2-17]	0	2087.08	16	0	0.892	0.832	0.637	-0.17	-0.27	-0.65	0.451045	0.251536	0.0401813	0.96922	0.855142	0.273821	14.7	8.52	27.33	8.74907	7.99389	9.48961	0.696	0.866	1.128		0.918
1231	High	Unambiguous	VMSSSNPDLTGSHCAADEEVK	[R].VMSSSNPDLTGSHCAADEEVK.[N]	1xCarbamidomethyl [C14]; 1xOxidation [M2]; 1xTMT6plex [K21]; 1xTMT6plex [N-Term]; 1xPhospho [S/T]	1xCarbamidomethyl [C14]; 1xOxidation [M2]; 1xTMT6plex [K21]; 1xTMT6plex [N-Term]; 1xPhospho [S3(47.9); S4(4.2); S5(47.9); T10(0); S12(0)]	Q8C147 1xPhospho [S/T]	Q8C147 1xPhospho [S903(47.9); S904(4.2); S905(47.9); T910(0); S912(0)]	9.49e-05	0	1.589	1	1	8	Q8C147	Q8C147	Dedicator of cytokinesis protein 8 OS=Mus musculus OX=10090 GN=Dock8 PE=1 SV=4	Dock8	Dock8_[S903/S904/S905]	YES	Q8C147	Q8C147 [901-921]	0	2788.26	21	0	0.762	0.9	0.634	-0.39	-0.15	-0.66	0.0542676	0.549773	0.0751522	0.380718	0.979644	0.416047	9.49	5.18	24.91	8.3336	7.84612	8.85674	0.678		0.906		0.762
2698	High	Unambiguous	ASGVAVSDGVIK	[M].ASGVAVSDGVIK.[V]	1xAcetyl [N-Term]; 1xTMT6plex [K12]; 1xTMT6plex [N-Term]; 1xPhospho [S2(100)]	1xAcetyl [N-Term]; 1xTMT6plex [K12]; 1xTMT6plex [N-Term]; 1xPhospho [S2(100); S7(0)]	P18760 1xAcetyl [N-Term]; 1xPhospho [S3(100)]	P18760 1xAcetyl [N-Term]; 1xPhospho [S3(100); S8(0)]	0.000381137	0	1.311	1	1	20	P18760	P18760	Cofilin-1 OS=Mus musculus OX=10090 GN=Cfl1 PE=1 SV=3	Cfl1	Cfl1_S3	YES	P18760	P18760 [2-13]	0	1682.91	12	0	0.734	1.191	1.071	-0.45	0.25	0.1	0.0307091	0.263069	0.905017	0.26405	0.862634	0.999462	19.15	43.02	10.85	9.33718	7.75355	9.6858	0.558	0.734	0.483	0.867	1.203
1327	High	Unambiguous	VDNLTYRTSPDTLR	[K].VDNLTYRTSPDTLR.[R]	1xTMT6plex [N-Term]; 1xPhospho [T8(92.3)]	1xTMT6plex [N-Term]; 1xPhospho [T5(0); Y6(0.6); T8(92.3); S9(7.1); T12(0)]	Q62093 1xPhospho [T25(92.3)]	Q62093 1xPhospho [T22(0); Y23(0.6); T25(92.3); S26(7.1); T29(0)]	5.11e-05	0	1.712	1	1	11	Q62093	Q62093	Serine/arginine-rich splicing factor 2 OS=Mus musculus OX=10090 GN=Srsf2 PE=1 SV=4	Srsf2	Srsf2_T25	YES	Q62093	Q62093 [18-31]	1	1959.97	14	0	0.968	1.118	1.114	-0.05	0.16	0.16	0.846792	0.456906	0.756931	0.999182	0.964357	0.998116	24.8	60.87	85.14	9.57289	8.19032	9.91064	0.122	1.141	0.785	0.968	0.973
6354	High	Unambiguous	KDSTSLSPAR	[R].KDSTSLSPAR.[G]	1xTMT6plex [K1]; 1xTMT6plex [N-Term]; 1xPhospho [S7(89.1)]	1xTMT6plex [K1]; 1xTMT6plex [N-Term]; 1xPhospho [S3(1); T4(8.9); S5(1); S7(89.1)]	P01108 1xPhospho [S164(89.1)]	P01108 1xPhospho [S160(1); T161(8.9); S162(1); S164(89.1)]	0.0818694	0.00777785	0.26	1	1	5	P01108	P01108	Myc proto-oncogene protein OS=Mus musculus OX=10090 GN=Myc PE=1 SV=1	Myc	Myc_S164	YES	P01108	P01108 [158-167]	1	1599.85	10	0	0.842	1.062	1.177	-0.25	0.09	0.24	0.236034	0.632609	0.638385	0.81305	0.99264	0.998116	26.06	10.25	36.97	9.21359	8.22738	9.01681			0.597	0.842	1.05
3474	High	Unambiguous	SEGSPVLPHEPSK	[K].SEGSPVLPHEPSK.[V]	1xTMT6plex [K13]; 1xTMT6plex [N-Term]; 1xPhospho [S1(94)]	1xTMT6plex [K13]; 1xTMT6plex [N-Term]; 1xPhospho [S1(94); S4(6); S12(0)]	P83510 1xPhospho [S737(94)]	P83510 1xPhospho [S737(94); S740(6); S748(0)]	0.0028825	0.000530845	0.893	1	1	7	P83510	P83510	Traf2 and NCK-interacting protein kinase OS=Mus musculus OX=10090 GN=Tnik PE=1 SV=2	Tnik	Tnik_S737	YES	P83510	P83510 [737-749]	0	1901.98	13	0	0.998	0.906	1.074	0	-0.14	0.1	0.960399	0.46933	0.88117	0.99999	0.965022	0.99895	28.76	20.74	13.63	8.28123	7.39832	9.03039	1.23	1.027	0.998	0.804	0.79
847	High	Unambiguous	KQEFMSDTNLSEHAAIPAR	[R].KQEFMSDTNLSEHAAIPAR.[V]	1xOxidation [M5]; 1xTMT6plex [K1]; 1xTMT6plex [N-Term]; 1xPhospho [S6(100)]	1xOxidation [M5]; 1xTMT6plex [K1]; 1xTMT6plex [N-Term]; 1xPhospho [S6(100); T8(0); S11(0)]	Q8C3J5 1xPhospho [S1729(100)]	Q8C3J5 1xPhospho [S1729(100); T1731(0); S1734(0)]	0.000348642	0	1.329	1	1	3	Q8C3J5	Q8C3J5	Dedicator of cytokinesis protein 2 OS=Mus musculus OX=10090 GN=Dock2 PE=1 SV=3	Dock2	Dock2_S1729	YES	Q8C3J5	Q8C3J5 [1724-1742]	1	2699.33	19	0	0.791	1.129	0.536	-0.34	0.18	-0.9	0.17489	0.346046	0.0213886	0.731211	0.920448	0.171636	12.45	23.79	10.33	7.86728	7.04221	8.61139	0.915	0.685	0.791
5895	High	Unambiguous	KESESEDSSDDEPLIKK	[K].KESESEDSSDDEPLIKK.[L]	3xTMT6plex [K1; K16; K17]; 1xTMT6plex [N-Term]; 4xPhospho [S3(100); S5(100); S8(100); S9(100)]	3xTMT6plex [K1; K16; K17]; 1xTMT6plex [N-Term]; 4xPhospho [S3(100); S5(100); S8(100); S9(100)]	Q7TNV0 4xPhospho [S306(100); S308(100); S311(100); S312(100)]	Q7TNV0 4xPhospho [S306(100); S308(100); S311(100); S312(100)]	0.045043	0.00471201	0.364	1	1	3	Q7TNV0	Q7TNV0	Protein DEK OS=Mus musculus OX=10090 GN=Dek PE=1 SV=1	Dek	Dek_S306;S308;S311;S312	YES	Q7TNV0	Q7TNV0 [304-320]	2	3172.42	17	0	1.128	0.974	1.219	0.17	-0.04	0.29	0.433827	0.914003	0.563831	0.963624	0.997187	0.996923	1.63	0.12	15.51	8.38629	7.68299	8.88905	0.539	1.128		1.14
2036	High	Unambiguous	DWEDDSDEDMSNFDR	[K].DWEDDSDEDMSNFDR.[F]	1xOxidation [M10]; 1xTMT6plex [N-Term]; 1xPhospho [S6(100)]	1xOxidation [M10]; 1xTMT6plex [N-Term]; 1xPhospho [S6(100); S11(0)]	Q9R0Q7 1xPhospho [S113(100)]	Q9R0Q7 1xPhospho [S113(100); S118(0)]	0.000123295	0	1.537	1	1	6	Q9R0Q7	Q9R0Q7	Prostaglandin E synthase 3 OS=Mus musculus OX=10090 GN=Ptges3 PE=1 SV=1	Ptges3	Ptges3_S113	NO	Q9R0Q7	Q9R0Q7 [108-122]	0	2200.79	15	0	0.862	0.979	0.661	-0.21	-0.03	-0.6	0.482001	0.91412	0.115967	0.976379	0.997187	0.545695	7.3	33.52	21.41	7.03452	6.94134	8.08162	0.922	0.862	0.805
1686	High	Unambiguous	RPPSQSLTSSSLSSPDIFDSPSPEEDKEEHISLAHR	[R].RPPSQSLTSSSLSSPDIFDSPSPEEDKEEHISLAHR.[G]	1xTMT6plex [K27]; 1xTMT6plex [N-Term]; 1xPhospho [S22(99.8)]	1xTMT6plex [K27]; 1xTMT6plex [N-Term]; 1xPhospho [S4(0); S6(0); T8(0); S9(0); S10(0); S11(0); S13(0); S14(0); S20(0.2); S22(99.8); S32(0)]	Q8R550 1xPhospho [S555(99.8)]	Q8R550 1xPhospho [S537(0); S539(0); T541(0); S542(0); S543(0); S544(0); S546(0); S547(0); S553(0.2); S555(99.8); S565(0)]	8.14e-06	0	2.076	1	1	8	Q8R550	Q8R550	SH3 domain-containing kinase-binding protein 1 OS=Mus musculus OX=10090 GN=Sh3kbp1 PE=1 SV=1	Sh3kbp1	Sh3kbp1_S555	YES	Q8R550	Q8R550 [534-569]	1	4501.19	36	0	0.877	1.064	0.753	-0.19	0.09	-0.41	0.501703	0.637637	0.327813	0.979989	0.99264	0.902138	6.85	23.27	17.22	7.15663	6.54439	7.65137	0.811		0.923	0.936	0.833
256	High	Unambiguous	QLSSGVSEIR	[R].QLSSGVSEIR.[Q]	1xTMT6plex [N-Term]; 1xPhospho [S3(95.5)]	1xTMT6plex [N-Term]; 1xPhospho [S3(95.5); S4(4.5); S7(0)]	P14602 1xPhospho [S86(95.5)]	P14602 1xPhospho [S86(95.5); S87(4.5); S90(0)]	0.000717544	0	1.182	1	1	10	P14602	P14602	Heat shock protein beta-1 OS=Mus musculus OX=10090 GN=Hspb1 PE=1 SV=3	Hspb1	Hspb1_S86	YES	P14602	P14602 [84-93]	0	1384.7	10	0	0.923	1.525	1.322	-0.12	0.61	0.4	0.531261	0.000252653	0.280325	0.986329	0.0110369	0.85382	33.68	47.06	27.05	10.6992	9.7657	10.95	0.362	1.169	0.435	1.021	0.923
3393	High	Unambiguous	ASEDESDLEDEEEKSQEDTEQK	[K].ASEDESDLEDEEEKSQEDTEQK.[R]	2xTMT6plex [K14; K22]; 1xTMT6plex [N-Term]; 1xPhospho [S6(98.9)]	2xTMT6plex [K14; K22]; 1xTMT6plex [N-Term]; 1xPhospho [S2(1.1); S6(98.9); S15(0); T19(0)]	P25206 1xPhospho [S672(98.9)]	P25206 1xPhospho [S668(1.1); S672(98.9); S681(0); T685(0)]	0.00163674	0.000404169	1.011	1	1	9	P25206	P25206	DNA replication licensing factor MCM3 OS=Mus musculus OX=10090 GN=Mcm3 PE=1 SV=2	Mcm3	Mcm3_S668	YES	P25206	P25206 [667-688]	1	3337.49	22	0	0.958	1.281	1.208	-0.06	0.36	0.27	0.858002	0.0699775	0.57317	0.999182	0.543864	0.996923	2.7	28.7	41.2	8.10252	7.31808	8.46806	0.946	0.984	0.97		0.866
400	High	Unambiguous	QGSFSEDVISHK	[R].QGSFSEDVISHK.[G]	1xTMT6plex [K12]; 1xTMT6plex [N-Term]; 1xPhospho [S3(99.9)]	1xTMT6plex [K12]; 1xTMT6plex [N-Term]; 1xPhospho [S3(99.9); S5(0.2); S10(0)]	Q9QXZ0 1xPhospho [S3889(99.9)]	Q9QXZ0 1xPhospho [S3889(99.9); S3891(0.2); S3896(0)]	7.9e-06	0	2.082	1	1	6	Q9QXZ0	Q9QXZ0	Microtubule-actin cross-linking factor 1 OS=Mus musculus OX=10090 GN=Macf1 PE=1 SV=2	Macf1	Macf1_S3889	YES	Q9QXZ0	Q9QXZ0 [3887-3898]	0	1871.93	12	0	0.746	0.989	0.713	-0.42	-0.02	-0.49	0.049161	0.971515	0.138219	0.36028	0.998927	0.59742	12.77	23.99	17.77	9.10144	7.87095	9.47763	0.727	0.982	0.533		0.765
928	High	Unambiguous	TLSSPTGTETNPPK	[R].TLSSPTGTETNPPK.[A]	1xTMT6plex [K14]; 1xTMT6plex [N-Term]; 1xPhospho [T6(91)]	1xTMT6plex [K14]; 1xTMT6plex [N-Term]; 1xPhospho [T1(0.2); S3(4.3); S4(4.3); T6(91); T8(0.2); T10(0)]	Q3UMF0 1xPhospho [T899(91)]	Q3UMF0 1xPhospho [T894(0.2); S896(4.3); S897(4.3); T899(91); T901(0.2); T903(0)]	0.000323646	0	1.344	1	1	7	Q3UMF0	Q3UMF0	Cordon-bleu protein-like 1 OS=Mus musculus OX=10090 GN=Cobll1 PE=1 SV=2	Cobll1	Cobll1_T899	YES	Q3UMF0	Q3UMF0 [894-907]	0	1968.01	14	0	0.718	1.014	0.614	-0.48	0.02	-0.7	0.0435338	0.899802	0.0416415	0.331563	0.997038	0.282353	2.19	22.14	6.63	7.68089	6.8505	8.2317	0.718		0.697		0.944
3376	High	Unambiguous	GQTPLTEGSEDLDGHSDPEESFAR	[R].GQTPLTEGSEDLDGHSDPEESFAR.[D]	1xTMT6plex [N-Term]; 2xPhospho [S9(98.5); S16(100)]	1xTMT6plex [N-Term]; 2xPhospho [T3(0); T6(1.5); S9(98.5); S16(100); S21(0)]	Q9CQV4 2xPhospho [S313(98.5); S320(100)]	Q9CQV4 2xPhospho [T307(0); T310(1.5); S313(98.5); S320(100); S325(0)]	0.00156007	0.000404169	1.021	1	1	3	Q9CQV4	Q9CQV4	Reticulophagy regulator 3 OS=Mus musculus OX=10090 GN=Retreg3 PE=1 SV=1	Retreg3	Retreg3_S320;S313	NO	Q9CQV4	Q9CQV4 [305-328]	0	2963.22	24	0	0.829	1.004	1.114	-0.27	0.01	0.16	0.322604	0.899422	0.729135	0.897857	0.997038	0.998116	11.09	8.44	29.27	6.71012	6.49346	7.33985	0.829	0.739	0.937
190	High	Unambiguous	LSRQPSIELPSMAVASTK	[K].LSRQPSIELPSMAVASTK.[T]	1xTMT6plex [K18]; 1xTMT6plex [N-Term]; 1xPhospho [S6(100)]	1xTMT6plex [K18]; 1xTMT6plex [N-Term]; 1xPhospho [S2(0); S6(100); S11(0); S16(0); T17(0)]	P19973 1xPhospho [S243(100)]	P19973 1xPhospho [S239(0); S243(100); S248(0); S253(0); T254(0)]	4.38e-06	0	2.199	1	1	4	P19973	P19973	Lymphocyte-specific protein 1 OS=Mus musculus OX=10090 GN=Lsp1 PE=1 SV=2	Lsp1	Lsp1_S243	YES	P19973	P19973 [238-255]	1	2453.32	18	0	0.844	0.901	1.161	-0.25	-0.15	0.22	0.341645	0.572396	0.554337	0.904271	0.982767	0.996923	16.35	3.59	27.01	7.28449	6.57563	7.16607	0.36	0.82		0.869	1.08
2523	High	Unambiguous	AEAKEESEESDEDMGFGLFD	[K].AEAKEESEESDEDMGFGLFD.[-]	1xOxidation [M14]; 1xTMT6plex [K4]; 1xTMT6plex [N-Term]; 2xPhospho [S7(100); S10(100)]	1xOxidation [M14]; 1xTMT6plex [K4]; 1xTMT6plex [N-Term]; 2xPhospho [S7(100); S10(100)]	P14869 2xPhospho [S304(100); S307(100)]	P14869 2xPhospho [S304(100); S307(100)]	4.89e-06	0	2.177	1	1	17	P14869	P14869	60S acidic ribosomal protein P0 OS=Mus musculus OX=10090 GN=Rplp0 PE=1 SV=3	Rplp0	Rplp0_S304;S307	YES	P14869	P14869 [298-317]	1	2869.15	20	0	0.782	0.939	0.914	-0.36	-0.09	-0.13	0.138838	0.701129	0.603402	0.659979	0.99264	0.996923	4.71	10.1	22.57	7.97613	7.78463	8.20653	0.605	0.782	0.798	0.741	1.201
2652	High	Unambiguous	APQQQPPPQQPPPPQPPPQQPPPPPSYSPAR	[R].APQQQPPPQQPPPPQPPPQQPPPPPSYSPAR.[N]	1xTMT6plex [N-Term]; 1xPhospho [S/Y]	1xTMT6plex [N-Term]; 1xPhospho [S26(33.3); Y27(33.3); S28(33.3)]	Q8VDM6 1xPhospho [S/Y]	Q8VDM6 1xPhospho [S719(33.3); Y720(33.3); S721(33.3)]	6.88e-05	0	1.653	1	1	14	Q8VDM6	Q8VDM6	Heterogeneous nuclear ribonucleoprotein U-like protein 1 OS=Mus musculus OX=10090 GN=Hnrnpul1 PE=1 SV=1	Hnrnpul1	Hnrnpul1_[Y720/S721]	YES	Q8VDM6	Q8VDM6 [694-724]	0	3637.82	31	0	0.837	1.002	0.979	-0.26	0	-0.03	0.324349	0.924343	0.938713	0.89884	0.997187	0.999462	8.85	25.68	6.89	7.26115	7.10224	7.60955	0.806	0.908	0.66	1.031	0.837
3588	High	Unambiguous	AFQFQPPLPPGTPPPLPQGTPPPLFTPPLPK	[K].AFQFQPPLPPGTPPPLPQGTPPPLFTPPLPK.[G]	1xTMT6plex [K31]; 1xTMT6plex [N-Term]; 1xPhospho [T12(100)]	1xTMT6plex [K31]; 1xTMT6plex [N-Term]; 1xPhospho [T12(100); T20(0); T26(0)]	Q9CYA6 1xPhospho [T474(100)]	Q9CYA6 1xPhospho [T474(100); T482(0); T488(0)]	0.00219269	0.000530845	0.95	1	1	7	Q9CYA6	Q9CYA6	Zinc finger CCHC domain-containing protein 8 OS=Mus musculus OX=10090 GN=Zcchc8 PE=1 SV=3	Zcchc8	Zcchc8_T474	YES	Q9CYA6	Q9CYA6 [463-493]	0	3810.08	31	0	0.673	0.998	1.216	-0.57	0	0.28	0.0500326	0.966852	0.394248	0.362575	0.998927	0.947458	6.14	26.39	20.28	6.05972	5.59104	6.31381	0.567		0.657	1.124	0.69
3617	High	Unambiguous	AMSTTSVTSSQPGK	[R].AMSTTSVTSSQPGK.[L]	1xOxidation [M2]; 1xTMT6plex [K14]; 1xTMT6plex [N-Term]; 1xPhospho [S/T]	1xOxidation [M2]; 1xTMT6plex [K14]; 1xTMT6plex [N-Term]; 1xPhospho [S3(32.6); T4(32.6); T5(32.6); S6(2.4); T8(0); S9(0); S10(0)]	Q62418 1xPhospho [S/T]	Q62418 1xPhospho [S277(32.6); T278(32.6); T279(32.6); S280(2.4); T282(0); S283(0); S284(0)]	0.00171715	0.000530845	1.001	1	1	8	Q62418	Q62418	Drebrin-like protein OS=Mus musculus OX=10090 GN=Dbnl PE=1 SV=2	Dbnl	Dbnl_[S277/T278/T279]	YES	Q62418	Q62418 [275-288]	0	1935.95	14	0	0.7	1.053	0.642	-0.52	0.07	-0.64	0.0126147	0.676859	0.0546319	0.140182	0.99264	0.340654	9.05	1.9	23.42	8.76653	7.82464	9.27123	0.7	0.787	0.604
5568	High	Unambiguous	LSSPVLHR	[R].LSSPVLHR.[L]	1xTMT6plex [N-Term]; 1xPhospho [S3(95.1)]	1xTMT6plex [N-Term]; 1xPhospho [S2(4.9); S3(95.1)]	Q9QXS6 1xPhospho [S142(95.1)]	Q9QXS6 1xPhospho [S141(4.9); S142(95.1)]	0.0268674	0.00274619	0.458	1	1	3	Q9QXS6	Q9QXS6	Drebrin OS=Mus musculus OX=10090 GN=Dbn1 PE=1 SV=4	Dbn1	Dbn1_[S141/S142]	YES	Q9QXS6	Q9QXS6 [140-147]	0	1217.66	8	0	0.854	1.195	1.088	-0.23	0.26	0.12	0.298271	0.250199	0.879985	0.877044	0.85438	0.99895	14.35	25.24	14.88	9.04958	7.92362	9.26796		0.854	0.492		0.967
4680	High	Unambiguous	APDRTPPSEEDSAEAER	[R].APDRTPPSEEDSAEAER.[L]	1xTMT6plex [N-Term]; 1xPhospho [T5(100)]	1xTMT6plex [N-Term]; 1xPhospho [T5(100); S8(0); S12(0)]	Q8BJU0 1xPhospho [T82(100)]	Q8BJU0 1xPhospho [T82(100); S85(0); S89(0)]	0.00582368	0.000907142	0.749	1	1	8	Q8BJU0	Q8BJU0	Small glutamine-rich tetratricopeptide repeat-containing protein alpha OS=Mus musculus OX=10090 GN=Sgta PE=1 SV=2	Sgta	Sgta_T82	YES	Q8BJU0	Q8BJU0 [78-94]	1	2165.95	17	0	0.831	1.115	0.775	-0.27	0.16	-0.37	0.17449	0.47661	0.299818	0.730463	0.965284	0.87068	5.89	24.27	11.73	8.4393	7.93454	8.56153	0.793	0.773	0.871		0.887
2522	High	Unambiguous	AEAKEESEESDEDMGFGLFD	[K].AEAKEESEESDEDMGFGLFD.[-]	1xTMT6plex [K4]; 1xTMT6plex [N-Term]; 2xPhospho [S7(100); S10(100)]	1xTMT6plex [K4]; 1xTMT6plex [N-Term]; 2xPhospho [S7(100); S10(100)]	P14869 2xPhospho [S304(100); S307(100)]	P14869 2xPhospho [S304(100); S307(100)]	0.000144794	0	1.505	1	1	7	P14869	P14869	60S acidic ribosomal protein P0 OS=Mus musculus OX=10090 GN=Rplp0 PE=1 SV=3	Rplp0	Rplp0_S304;S307	YES	P14869	P14869 [298-317]	1	2853.15	20	0	0.913	0.946	0.976	-0.13	-0.08	-0.03	0.743659	0.841105	0.945757	0.997174	0.995193	0.999899	9.52	6.73	45.5	5.98413	5.77347	6.43296	0.781	0.925	0.843	0.913	1.242
2606	High	Unambiguous	AVSLDSPVSVGSGPPVK	[R].AVSLDSPVSVGSGPPVK.[N]	1xTMT6plex [K17]; 1xTMT6plex [N-Term]; 1xPhospho [S3(99.8)]	1xTMT6plex [K17]; 1xTMT6plex [N-Term]; 1xPhospho [S3(99.8); S6(0.2); S9(0); S12(0)]	O09000 1xPhospho [S847(99.8)]	O09000 1xPhospho [S847(99.8); S850(0.2); S853(0); S856(0)]	2.05e-07	0	2.805	1	1	9	O09000	O09000	Nuclear receptor coactivator 3 OS=Mus musculus OX=10090 GN=Ncoa3 PE=1 SV=2	Ncoa3	Ncoa3_S847	YES	O09000	O09000 [845-861]	0	2134.16	17	0	0.962	1.067	1.503	-0.06	0.09	0.59	0.774872	0.619688	0.121418	0.998955	0.992106	0.559343	10.64	11.6	30.54	9.61839	8.837	9.83857	0.962	0.928	0.554	1.036	1.059
4977	High	Unambiguous	RKSPENTEGK	[K].RKSPENTEGK.[D]	2xTMT6plex [K2; K10]; 1xTMT6plex [N-Term]; 1xPhospho [S3(100)]	2xTMT6plex [K2; K10]; 1xTMT6plex [N-Term]; 1xPhospho [S3(100); T7(0)]	Q9DCB1 1xPhospho [S6(100)]	Q9DCB1 1xPhospho [S6(100); T10(0)]	0.0115823	0.00131309	0.615	1	1	9	Q9DCB1	Q9DCB1	High mobility group nucleosome-binding domain-containing protein 3 OS=Mus musculus OX=10090 GN=Hmgn3 PE=1 SV=1	Hmgn3	Hmgn3_S6	YES	Q9DCB1	Q9DCB1 [4-13]	2	1913.05	10	0	0.888	0.969	0.844	-0.17	-0.05	-0.24	0.371298	0.805107	0.383398	0.927164	0.994856	0.940098	8.55	8.18	36.97	11.0489	10.2395	11.2934	1.097	0.831	0.791	0.953	0.888
905	High	Unambiguous	KTGSYGALAEISASK	[R].KTGSYGALAEISASK.[E]	2xTMT6plex [K1; K15]; 1xTMT6plex [N-Term]; 1xPhospho [Y5(94.8)]	2xTMT6plex [K1; K15]; 1xTMT6plex [N-Term]; 1xPhospho [T2(0.3); S4(4.9); Y5(94.8); S12(0); S14(0)]	Q9DBR7 1xPhospho [Y446(94.8)]	Q9DBR7 1xPhospho [T443(0.3); S445(4.9); Y446(94.8); S453(0); S455(0)]	7.14e-06	0	2.102	1	1	10	Q9DBR7	Q9DBR7	Protein phosphatase 1 regulatory subunit 12A OS=Mus musculus OX=10090 GN=Ppp1r12a PE=1 SV=2	Ppp1r12a	Ppp1r12a_Y446	YES	Q9DBR7	Q9DBR7 [442-456]	1	2250.23	15	0	1.158	1.295	1.392	0.21	0.37	0.48	0.343538	0.0889336	0.291081	0.906364	0.604637	0.860228	26.38	33.25	68.47	8.41895	7.81924	8.96255		0.986	0.764	1.36	1.368
804	High	Unambiguous	KQPSPAPTPSTPTGAACLDR	[R].KQPSPAPTPSTPTGAACLDR.[S]	1xCarbamidomethyl [C17]; 1xTMT6plex [K1]; 1xTMT6plex [N-Term]; 1xPhospho [S4(100)]	1xCarbamidomethyl [C17]; 1xTMT6plex [K1]; 1xTMT6plex [N-Term]; 1xPhospho [S4(100); T8(0); S10(0); T11(0); T13(0)]	P97303 1xPhospho [S314(100)]	P97303 1xPhospho [S314(100); T318(0); S320(0); T321(0); T323(0)]	5.94e-05	0	1.682	1	1	5	P97303	P97303	Transcription regulator protein BACH2 OS=Mus musculus OX=10090 GN=Bach2 PE=1 SV=3	Bach2	Bach2_S314	YES	P97303	P97303 [311-330]	1	2590.31	20	0	0.896	1.038	0.752	-0.16	0.05	-0.41	0.490422	0.794749	0.268867	0.979638	0.994856	0.842462	3.05	19.81	28.05	8.23992	8.05666	8.60956	1.077		0.876	0.917	0.871
854	High	Unambiguous	KPSPSPPPPTATESR	[R].KPSPSPPPPTATESR.[K]	1xTMT6plex [K1]; 1xTMT6plex [N-Term]; 2xPhospho [S3(100); S5(100)]	1xTMT6plex [K1]; 1xTMT6plex [N-Term]; 2xPhospho [S3(100); S5(100); T10(0); T12(0); S14(0)]	P97496 2xPhospho [S327(100); S329(100)]	P97496 2xPhospho [S327(100); S329(100); T334(0); T336(0); S338(0)]	0.000184199	0	1.457	1	1	5	P97496	P97496	SWI/SNF complex subunit SMARCC1 OS=Mus musculus OX=10090 GN=Smarcc1 PE=1 SV=2	Smarcc1	Smarcc1_S327;S329	YES	P97496	P97496 [325-339]	0	2167.06	15	0	0.872	0.821	1.071	-0.2	-0.28	0.1	0.408721	0.246241	0.932439	0.952096	0.852702	0.999462	7.3	14.41	13.4	8.19463	7.501	8.28078		1.02	0.796	0.908	0.837
2691	High	Unambiguous	APKPEPVPEPKEPSPEK	[K].APKPEPVPEPKEPSPEK.[N]	3xTMT6plex [K3; K11; K17]; 1xTMT6plex [N-Term]; 1xPhospho [S14(100)]	3xTMT6plex [K3; K11; K17]; 1xTMT6plex [N-Term]; 1xPhospho [S14(100)]	Q52KI8 1xPhospho [S260(100)]	Q52KI8 1xPhospho [S260(100)]	4.2e-05	0	1.751	1	1	7	Q52KI8	Q52KI8	Serine/arginine repetitive matrix protein 1 OS=Mus musculus OX=10090 GN=Srrm1 PE=1 SV=2	Srrm1	Srrm1_S260	YES	Q52KI8	Q52KI8 [247-263]	1	2852.6	17	0	1.024	1.609	1.331	0.03	0.69	0.41	0.926147	0.00020732	0.267211	0.999853	0.00942348	0.840675	29.41	34.53	25.53	10.5525	9.54197	10.2394	0.299	1.188	0.882		1.265
2733	High	Unambiguous	AQSTDSLGTSSSLQSK	[R].AQSTDSLGTSSSLQSK.[A]	1xTMT6plex [K16]; 1xTMT6plex [N-Term]; 2xPhospho [S6(96.9); S/T]	1xTMT6plex [K16]; 1xTMT6plex [N-Term]; 2xPhospho [S3(51.5); T4(51.5); S6(96.9); T9(0.1); S10(0); S11(0); S12(0); S15(0)]	O35551 2xPhospho [S410(96.9); S/T]	O35551 2xPhospho [S407(51.5); T408(51.5); S410(96.9); T413(0.1); S414(0); S415(0); S416(0); S419(0)]	0.000386833	0	1.308	1	1	6	O35551	O35551	Rab GTPase-binding effector protein 1 OS=Mus musculus OX=10090 GN=Rabep1 PE=1 SV=2	Rabep1	Rabep1_S410;[S407/T408]	YES	O35551	O35551 [405-420]	0	2215.03	16	0	0.86	1.141	0.949	-0.22	0.19	-0.08	0.424889	0.425604	0.768733	0.958333	0.953598	0.998116	20.29	19.27	27.27	7.10434	5.87774	7.47816	0.701	0.86	0.662	1.243	0.933
3298	High	Unambiguous	AKSPTPDGSER	[R].AKSPTPDGSER.[I]	1xTMT6plex [K2]; 1xTMT6plex [N-Term]; 2xPhospho [S3(100); T5(100)]	1xTMT6plex [K2]; 1xTMT6plex [N-Term]; 2xPhospho [S3(100); T5(100); S9(0)]	E9Q5K9 2xPhospho [S146(100); T148(100)]	E9Q5K9 2xPhospho [S146(100); T148(100); S152(0)]	0.00121522	0.000209709	1.073	1	1	13	E9Q5K9	E9Q5K9	YTH domain-containing protein 1 OS=Mus musculus OX=10090 GN=Ythdc1 PE=1 SV=2	Ythdc1	Ythdc1_S146;T148	YES	E9Q5K9	E9Q5K9 [144-154]	1	1762.82	11	0	1.025	1.012	1.102	0.04	0.02	0.14	0.91744	0.890423	0.772538	0.999853	0.997038	0.998116	25.71	21.59	22.68	10.2024	9.98114	10.4091	1.438	1.203	0.834	1.025	1.02
3558	High	Unambiguous	KGTGDCSDEEVDGKADGADAK	[R].KGTGDCSDEEVDGKADGADAK.[A]	1xCarbamidomethyl [C6]; 3xTMT6plex [K1; K14; K21]; 1xTMT6plex [N-Term]; 2xPhospho [T3(100); S7(100)]	1xCarbamidomethyl [C6]; 3xTMT6plex [K1; K14; K21]; 1xTMT6plex [N-Term]; 2xPhospho [T3(100); S7(100)]	Q8VDD5 2xPhospho [T1939(100); S1943(100)]	Q8VDD5 2xPhospho [T1939(100); S1943(100)]	0.00208009	0.000530845	0.961	1	1	5	Q8VDD5	Q8VDD5	Myosin-9 OS=Mus musculus OX=10090 GN=Myh9 PE=1 SV=4	Myh9	Myh9_T1939;S1943	YES	Q8VDD5	Q8VDD5 [1937-1957]	2	3201.48	21	0	0.822	1.163	0.806	-0.28	0.22	-0.31	0.186954	0.261418	0.283372	0.751079	0.860563	0.856766	23.34	22.96	7.5	9.84026	8.82885	10.4094	0.671	1.197		0.622	1.005
2328	High	Unambiguous	ELSGESDELGISQDEQLSK	[K].ELSGESDELGISQDEQLSK.[S]	1xTMT6plex [K19]; 1xTMT6plex [N-Term]; 1xPhospho [S]	1xTMT6plex [K19]; 1xTMT6plex [N-Term]; 1xPhospho [S3(50); S6(50); S12(0); S18(0)]	Q8R550 1xPhospho [S]	Q8R550 1xPhospho [S156(50); S159(50); S165(0); S171(0)]	3.91e-05	0	1.765	1	1	8	Q8R550	Q8R550	SH3 domain-containing kinase-binding protein 1 OS=Mus musculus OX=10090 GN=Sh3kbp1 PE=1 SV=1	Sh3kbp1	Sh3kbp1_[S156/S159]	YES	Q8R550	Q8R550 [154-172]	0	2602.25	19	0	0.792	1.058	0.641	-0.34	0.08	-0.64	0.217032	0.707129	0.0952511	0.793565	0.99264	0.486235	10.63	7.57	10.85	6.32544	5.65932	6.50811	0.858		0.605	0.907	0.731
1518	High	Unambiguous	SGSGSGGASAK	[R].SGSGSGGASAK.[E]	1xTMT6plex [K11]; 1xTMT6plex [N-Term]; 1xPhospho [S5(99.1)]	1xTMT6plex [K11]; 1xTMT6plex [N-Term]; 1xPhospho [S1(0); S3(0.4); S5(99.1); S9(0.4)]	P83741 1xPhospho [S185(99.1)]	P83741 1xPhospho [S181(0); S183(0.4); S185(99.1); S189(0.4)]	2.61e-05	0	1.845	1	1	7	P83741	P83741	Serine/threonine-protein kinase WNK1 OS=Mus musculus OX=10090 GN=Wnk1 PE=1 SV=2	Wnk1	Wnk1_S185	YES	P83741	P83741 [181-191]	0	1403.69	11	0	0.9	1.051	0.787	-0.15	0.07	-0.34	0.508275	0.744287	0.240814	0.979989	0.99264	0.796183	5.81	11.15	12.15	9.39339	8.73833	10.2938	0.621	0.974	0.887	0.914
3857	High	Unambiguous	SSLPHSQENLPK	[K].SSLPHSQENLPK.[L]	1xTMT6plex [K12]; 1xTMT6plex [N-Term]; 1xPhospho [S6(100)]	1xTMT6plex [K12]; 1xTMT6plex [N-Term]; 1xPhospho [S1(0); S2(0); S6(100)]	P70671 1xPhospho [S135(100)]	P70671 1xPhospho [S130(0); S131(0); S135(100)]	0.00210012	0.000530845	0.959	1	1	3	P70671	P70671	Interferon regulatory factor 3 OS=Mus musculus OX=10090 GN=Irf3 PE=1 SV=1	Irf3	Irf3_S135	YES	P70671	P70671 [130-141]	0	1874.98	12	0	0.899	1.124	0.886	-0.15	0.17	-0.17	0.46293	0.359372	0.513698	0.972882	0.923118	0.988481	17	5.54	29.21	9.25974	8.63771	9.71819		0.769	1.026		0.899
1576	High	Unambiguous	RLTSAEGPVTTDK	[K].RLTSAEGPVTTDK.[L]	1xTMT6plex [K13]; 1xTMT6plex [N-Term]; 1xPhospho [S4(100)]	1xTMT6plex [K13]; 1xTMT6plex [N-Term]; 1xPhospho [T3(0); S4(100); T10(0); T11(0)]	Q80U16 1xPhospho [S582(100)]	Q80U16 1xPhospho [T581(0); S582(100); T588(0); T589(0)]	6.83e-07	0	2.567	1	1	4	Q80U16	Q80U16	Rho family-interacting cell polarization regulator 2 OS=Mus musculus OX=10090 GN=Ripor2 PE=1 SV=2	Ripor2	Ripor2_S582	YES	Q80U16	Q80U16 [579-591]	1	1913.01	13	0	0.868	0.897	0.517	-0.2	-0.16	-0.95	0.314764	0.453307	0.00265	0.890526	0.964129	0.032699	4.79	4.51	5.01	9.30012	9.12722	10.3455	1.09	0.868	0.831
199	High	Unambiguous	LSRQPSIELPSMAVASTK	[K].LSRQPSIELPSMAVASTK.[T]	1xOxidation [M12]; 1xTMT6plex [K18]; 1xTMT6plex [N-Term]; 1xPhospho [S6(100)]	1xOxidation [M12]; 1xTMT6plex [K18]; 1xTMT6plex [N-Term]; 1xPhospho [S2(0); S6(100); S11(0); S16(0); T17(0)]	P19973 1xPhospho [S243(100)]	P19973 1xPhospho [S239(0); S243(100); S248(0); S253(0); T254(0)]	6.02e-06	0	2.136	1	1	4	P19973	P19973	Lymphocyte-specific protein 1 OS=Mus musculus OX=10090 GN=Lsp1 PE=1 SV=2	Lsp1	Lsp1_S243	YES	P19973	P19973 [238-255]	1	2469.32	18	0	0.88	0.983	1.007	-0.18	-0.02	0.01	0.49085	0.954908	0.986885	0.979638	0.997578	0.999899	13.46	3.7	37.25	7.83805	7.09062	8.03052		0.855	0.592	0.905	1.061
4248	High	Unambiguous	KASEEEYVIR	[R].KASEEEYVIR.[K]	1xTMT6plex [K1]; 1xTMT6plex [N-Term]; 1xPhospho [S3(100)]	1xTMT6plex [K1]; 1xTMT6plex [N-Term]; 1xPhospho [S3(100); Y7(0)]	Q8K4I3 1xPhospho [S639(100)]	Q8K4I3 1xPhospho [S639(100); Y643(0)]	0.00445942	0.000818925	0.803	1	1	3	Q8K4I3	Q8K4I3	Rho guanine nucleotide exchange factor 6 OS=Mus musculus OX=10090 GN=Arhgef6 PE=1 SV=1	Arhgef6	Arhgef6_S639	YES	Q8K4I3	Q8K4I3 [637-646]	1	1761.92	10	0	0.846	1.416	1.006	-0.24	0.5	0.01	0.249828	0.00797164	0.916631	0.830491	0.144958	0.999462	14.13	6.71	19.87	8.31061	7.37069	8.89845	0.731	0.846			0.959
2439	High	Unambiguous	AKSPQPPVEEEDEHFDDTVVCLDTYNCDLHFK	[R].AKSPQPPVEEEDEHFDDTVVCLDTYNCDLHFK.[I]	2xCarbamidomethyl [C21; C27]; 2xTMT6plex [K2; K32]; 1xTMT6plex [N-Term]; 1xPhospho [S3(100)]	2xCarbamidomethyl [C21; C27]; 2xTMT6plex [K2; K32]; 1xTMT6plex [N-Term]; 1xPhospho [S3(100); T18(0); T24(0); Y25(0)]	Q8VEK3 1xPhospho [S247(100)]	Q8VEK3 1xPhospho [S247(100); T262(0); T268(0); Y269(0)]	1.34e-06	0	2.433	1	1	6	Q8VEK3	Q8VEK3	Heterogeneous nuclear ribonucleoprotein U OS=Mus musculus OX=10090 GN=Hnrnpu PE=1 SV=1	Hnrnpu	Hnrnpu_S247	YES	Q8VEK3	Q8VEK3 [245-276]	1	4602.14	32	0	0.806	0.949	0.885	-0.31	-0.08	-0.18	0.262903	0.868955	0.676107	0.838333	0.996046	0.998116	4.87	15.83	35.68	6.37798	5.99068	6.6927	0.739		0.792	0.82	0.89
5173	High	Unambiguous	QPASLHGSTELLPLSR	[R].QPASLHGSTELLPLSR.[N]	1xTMT6plex [N-Term]; 2xPhospho [S4(99.5); S/T]	1xTMT6plex [N-Term]; 2xPhospho [S4(99.5); S8(50.3); T9(50.3); S15(0)]	Q91WG2 2xPhospho [S176(99.5); S/T]	Q91WG2 2xPhospho [S176(99.5); S180(50.3); T181(50.3); S187(0)]	0.0150151	0.00167845	0.566	1	1	7	Q91WG2	Q91WG2	Rab GTPase-binding effector protein 2 OS=Mus musculus OX=10090 GN=Rabep2 PE=1 SV=3	Rabep2	Rabep2_S176;T181	YES	Q91WG2	Q91WG2 [173-188]	0	2095.02	16	0	0.88	1.194	0.832	-0.18	0.26	-0.27	0.380153	0.254613	0.400588	0.934009	0.858826	0.947914	18.3	6.71	50.75	8.83794	7.76354	9.16867	0.74	0.88	0.572	0.929	1.064
4457	High	Unambiguous	AGSPQLDDIR	[R].AGSPQLDDIR.[V]	1xTMT6plex [N-Term]; 1xPhospho [S3(100)]	1xTMT6plex [N-Term]; 1xPhospho [S3(100)]	Q8CHW4 1xPhospho [S540(100)]	Q8CHW4 1xPhospho [S540(100)]	0.00741779	0.000907142	0.701	1	1	4	Q8CHW4	Q8CHW4	Translation initiation factor eIF-2B subunit epsilon OS=Mus musculus OX=10090 GN=Eif2b5 PE=1 SV=1	Eif2b5	Eif2b5_S540	YES	Q8CHW4	Q8CHW4 [538-547]	0	1380.67	10	0	0.91	0.885	0.872	-0.14	-0.18	-0.2	0.626248	0.348135	0.571308	0.98968	0.921371	0.996923	14.85	3.43	14.88	7.90147	7.31651	8.48824	0.562	1.02	0.91
1350	High	Unambiguous	TTAVEIDYDSLKR	[K].TTAVEIDYDSLKR.[K]	1xTMT6plex [K12]; 1xTMT6plex [N-Term]; 1xPhospho [S10(99.7)]	1xTMT6plex [K12]; 1xTMT6plex [N-Term]; 1xPhospho [T1(0); T2(0); Y8(0.3); S10(99.7)]	O35601 1xPhospho [S561(99.7)]	O35601 1xPhospho [T552(0); T553(0); Y559(0.3); S561(99.7)]	7.94e-06	0	2.081	1	1	6	O35601	O35601	FYN-binding protein 1 OS=Mus musculus OX=10090 GN=Fyb1 PE=1 SV=2	Fyb1	Fyb1_S561	YES	O35601	O35601 [552-564]	1	2049.07	13	0	0.705	0.958	0.9	-0.51	-0.06	-0.15	0.0133936	0.725246	0.553057	0.146062	0.99264	0.996923	6.98	7.71	30.8	9.89759	8.82394	10.3627	0.69	0.902	0.586	0.72
2556	High	Unambiguous	ATSPPHLDGTSNPESTVPEK	[K].ATSPPHLDGTSNPESTVPEK.[K]	1xTMT6plex [K20]; 1xTMT6plex [N-Term]; 1xPhospho [S3(93.2)]	1xTMT6plex [K20]; 1xTMT6plex [N-Term]; 1xPhospho [T2(6.9); S3(93.2); T10(0); S11(0); S15(0); T16(0)]	Q60953 1xPhospho [S528(93.2)]	Q60953 1xPhospho [T527(6.9); S528(93.2); T535(0); S536(0); S540(0); T541(0)]	2e-06	0	2.354	1	1	13	Q60953	Q60953	Protein PML OS=Mus musculus OX=10090 GN=Pml PE=1 SV=3	Pml	Pml_S528	YES	Q60953	Q60953 [526-545]	0	2602.28	20	0	1.056	1.001	0.812	0.08	0	-0.3	0.603791	0.911061	0.425477	0.98968	0.997187	0.962685	27.46	42.57	16.52	6.71425	6.20945	6.96347	0.799	1.056	1.047	1.252	1.313
3312	High	Unambiguous	TNSQDKIEFHNEVDGGK	[K].TNSQDKIEFHNEVDGGK.[Q]	2xTMT6plex [K6; K17]; 1xTMT6plex [N-Term]; 1xPhospho [S3(99.2)]	2xTMT6plex [K6; K17]; 1xTMT6plex [N-Term]; 1xPhospho [T1(0.8); S3(99.2)]	P06800 1xPhospho [S1229(99.2)]	P06800 1xPhospho [T1227(0.8); S1229(99.2)]	0.000888185	0.000209709	1.138	1	1	12	P06800	P06800	Receptor-type tyrosine-protein phosphatase C OS=Mus musculus OX=10090 GN=Ptprc PE=1 SV=4	Ptprc	Ptprc_S1229	YES	P06800	P06800 [1227-1243]	1	2685.35	17	0	0.746	0.987	0.719	-0.42	-0.02	-0.48	0.0361401	0.969487	0.117037	0.293798	0.998927	0.547443	3.95	34.83	33.18	9.92622	9.36522	10.3363	0.772	0.7	0.72		1.117
879	High	Unambiguous	LASPSGSTSSGLEVVAPEVTSAPVSGPGILDDSATICR	[R].LASPSGSTSSGLEVVAPEVTSAPVSGPGILDDSATICR.[V]	1xCarbamidomethyl [C37]; 1xTMT6plex [N-Term]; 2xPhospho [S10(94.5); T/S]	1xCarbamidomethyl [C37]; 1xTMT6plex [N-Term]; 2xPhospho [S3(0); S5(0); S7(0.1); T8(52.7); S9(52.7); S10(94.5); T20(0); S21(0); S25(0); S33(0); T35(0)]	Q62318 2xPhospho [S601(94.5); T/S]	Q62318 2xPhospho [S594(0); S596(0); S598(0.1); T599(52.7); S600(52.7); S601(94.5); T611(0); S612(0); S616(0); S624(0); T626(0)]	4.1e-06	0	2.212	1	1	30	Q62318	Q62318	Transcription intermediary factor 1-beta OS=Mus musculus OX=10090 GN=Trim28 PE=1 SV=3	Trim28	Trim28_S601;[T599/S600]	YES	Q62318	Q62318 [592-629]	0	4073.92	38	0	0.884	0.78	0.817	-0.18	-0.36	-0.29	0.603621	0.177484	0.465524	0.98968	0.781459	0.98223	15.03	14.29	25.86	5.62615	5.33443	6.02358	0.712		0.981	1.017	0.797
4985	High	Unambiguous	TNPPTQKPPSPPVSGR	[R].TNPPTQKPPSPPVSGR.[G]	1xTMT6plex [K7]; 1xTMT6plex [N-Term]; 1xPhospho [S10(100)]	1xTMT6plex [K7]; 1xTMT6plex [N-Term]; 1xPhospho [T1(0); T5(0); S10(100); S14(0)]	Q8CBW3 1xPhospho [S183(100)]	Q8CBW3 1xPhospho [T174(0); T178(0); S183(100); S187(0)]	0.0123385	0.00144147	0.603	1	1	5	Q8CBW3	Q8CBW3	Abl interactor 1 OS=Mus musculus OX=10090 GN=Abi1 PE=1 SV=3	Abi1	Abi1_S183	YES	Q8CBW3	Q8CBW3 [174-189]	0	2198.17	16	0	0.878	1.027	0.67	-0.19	0.04	-0.58	0.415184	0.820051	0.079796	0.955672	0.994856	0.430603	5.34	8.76	28.48	9.4168	8.68264	9.48321	0.799		0.919		0.878
932	High	Unambiguous	TLSNAEDYLDDEDSD	[R].TLSNAEDYLDDEDSD.[-]	1xTMT6plex [N-Term]; 1xPhospho [S14(100)]	1xTMT6plex [N-Term]; 1xPhospho [T1(0); S3(0); Y8(0); S14(100)]	Q62422 1xPhospho [S214(100)]	Q62422 1xPhospho [T201(0); S203(0); Y208(0); S214(100)]	1.17e-08	0	3.372	1	1	17	Q62422	Q62422	Osteoclast-stimulating factor 1 OS=Mus musculus OX=10090 GN=Ostf1 PE=1 SV=2	Ostf1	Ostf1_S214	YES	Q62422	Q62422 [201-215]	0	2010.79	15	0	0.806	0.862	0.557	-0.31	-0.21	-0.84	0.150795	0.249354	0.00883446	0.68214	0.853713	0.085325	3.03	4.87	24.64	9.0917	8.79409	9.49346	0.729	0.78	0.806	0.813	0.86
1396	High	Unambiguous	VIENTDGSEEEMDAR	[R].VIENTDGSEEEMDAR.[D]	1xOxidation [M12]; 1xTMT6plex [N-Term]; 1xPhospho [S8(100)]	1xOxidation [M12]; 1xTMT6plex [N-Term]; 1xPhospho [T5(0); S8(100)]	O08638 1xPhospho [S1954(100)]	O08638 1xPhospho [T1951(0); S1954(100)]	8.57e-07	0	2.522	1	1	23	O08638	O08638	Myosin-11 OS=Mus musculus OX=10090 GN=Myh11 PE=1 SV=1	Myh11	Myh11_S1954	YES	O08638	O08638 [1947-1961]	0	2019.84	15	0	0.817	0.897	0.871	-0.29	-0.16	-0.2	0.142791	0.44386	0.461555	0.669146	0.959188	0.979596	15.94	12.61	45.57	10.2367	9.38046	11.0269	0.686	1.052	1.131	0.817	0.747
1106	High	Unambiguous	SSTPLPTVSSSAENTR	[R].SSTPLPTVSSSAENTR.[Q]	1xTMT6plex [N-Term]; 1xPhospho [S1(90.3)]	1xTMT6plex [N-Term]; 1xPhospho [S1(90.3); S2(4.9); T3(4.9); T7(0); S9(0); S10(0); S11(0); T15(0)]	Q61029 1xPhospho [S157(90.3)]; Q61033 1xPhospho [S157(90.3)]	Q61029 1xPhospho [S157(90.3); S158(4.9); T159(4.9); T163(0); S165(0); S166(0); S167(0); T171(0)]; Q61033 1xPhospho [S157(90.3); S158(4.9); T159(4.9); T163(0); S165(0); S166(0); S167(0); T171(0)]	1.2e-06	0	2.456	2	2	24	Q61029; Q61033	Q61029	Lamina-associated polypeptide 2; isoforms beta/delta/epsilon/gamma OS=Mus musculus OX=10090 GN=Tmpo PE=1 SV=4;Lamina-associated polypeptide 2; isoforms alpha/zeta OS=Mus musculus OX=10090 GN=Tmpo PE=1 SV=4	Tmpo	Tmpo_S157	YES	Q61029; Q61033	Q61029 [157-172]; Q61033 [157-172]	0	1942.93	16	0	0.84	0.986	0.81	-0.25	-0.02	-0.3	0.246438	0.915436	0.294241	0.82446	0.997187	0.865077	4.6	4.68	37.01	9.4315	8.6756	10.084	0.789	0.84	0.822	0.877	1.011
3803	High	Unambiguous	SSSLDMNR	[R].SSSLDMNR.[T]	1xOxidation [M6]; 1xTMT6plex [N-Term]; 1xPhospho [S3(100)]	1xOxidation [M6]; 1xTMT6plex [N-Term]; 1xPhospho [S1(0); S2(0); S3(100)]	O54916 1xPhospho [S561(100)]	O54916 1xPhospho [S559(0); S560(0); S561(100)]	0.00197326	0.000530845	0.972	1	1	10	O54916	O54916	RalBP1-associated Eps domain-containing protein 1 OS=Mus musculus OX=10090 GN=Reps1 PE=1 SV=2	Reps1	Reps1_S561	YES	O54916	O54916 [559-566]	0	1234.53	8	0	0.846	0.98	0.927	-0.24	-0.03	-0.11	0.249719	0.898558	0.64156	0.830491	0.997038	0.998116	4.54	8.17	11.5	9.86418	9.5797	10.2141	0.878	0.805	0.814	0.965
1735	High	Unambiguous	SQNNFVAILDLPEGEHQYK	[R].SQNNFVAILDLPEGEHQYK.[F]	1xTMT6plex [K19]; 1xTMT6plex [N-Term]; 1xPhospho [S1(100)]	1xTMT6plex [K19]; 1xTMT6plex [N-Term]; 1xPhospho [S1(100); Y18(0)]	Q9R078 1xPhospho [S108(100)]	Q9R078 1xPhospho [S108(100); Y125(0)]	1.28e-08	0	3.355	1	1	3	Q9R078	Q9R078	5'-AMP-activated protein kinase subunit beta-1 OS=Mus musculus OX=10090 GN=Prkab1 PE=1 SV=2	Prkab1	Prkab1_S108	YES	Q9R078	Q9R078 [108-126]	0	2740.37	19	0	0.867	0.925	0.63	-0.21	-0.11	-0.67	0.440181	0.770701	0.0607851	0.968069	0.99264	0.362659	11.31	19.1	42.28	6.64097	6.0917	7.31288	0.532	0.955	0.867
3519	High	Unambiguous	SACFSPVSLSPRPCSPFSTPPPTSPVALSK	[R].SACFSPVSLSPRPCSPFSTPPPTSPVALSK.[E]	2xCarbamidomethyl [C3; C14]; 1xTMT6plex [K30]; 1xTMT6plex [N-Term]; 3xPhospho [S18(83.6); T19(94.6); T/S]	2xCarbamidomethyl [C3; C14]; 1xTMT6plex [K30]; 1xTMT6plex [N-Term]; 3xPhospho [S1(0); S5(0); S8(0); S10(0.1); S15(20.9); S18(83.6); T19(94.6); T23(50.3); S24(50.3); S29(0.1)]	Q8R1G6 3xPhospho [S137(83.6); T138(94.6); T/S]	Q8R1G6 3xPhospho [S120(0); S124(0); S127(0); S129(0.1); S134(20.9); S137(83.6); T138(94.6); T142(50.3); S143(50.3); S148(0.1)]	0.00249572	0.000530845	0.923	1	1	5	Q8R1G6	Q8R1G6	PDZ and LIM domain protein 2 OS=Mus musculus OX=10090 GN=Pdlim2 PE=1 SV=1	Pdlim2	Pdlim2_S120;S143;T138	YES	Q8R1G6	Q8R1G6 [120-149]	0	3856.79	30	0	0.779	0.783	0.939	-0.36	-0.35	-0.09	0.186494	0.228143	0.81412	0.750021	0.840316	0.998116	5.92	7.15	14.36	6.32633	5.85241	6.39302	0.683		0.786	0.772	0.906
228	High	Unambiguous	QPSEEEIIK	[R].QPSEEEIIK.[L]	1xTMT6plex [K9]; 1xTMT6plex [N-Term]; 1xPhospho [S3(100)]	1xTMT6plex [K9]; 1xTMT6plex [N-Term]; 1xPhospho [S3(100)]	Q62048 1xPhospho [S116(100)]	Q62048 1xPhospho [S116(100)]	0.000130958	0	1.525	1	1	12	Q62048	Q62048	Astrocytic phosphoprotein PEA-15 OS=Mus musculus OX=10090 GN=Pea15 PE=1 SV=1	Pea15	Pea15_S116	YES	Q62048	Q62048 [114-122]	0	1610.84	9	0	0.728	1.132	0.845	-0.46	0.18	-0.24	0.0237023	0.269023	0.386011	0.221329	0.872998	0.942103	12.76	16.59	19.08	11.5364	10.3457	11.8809	0.589	0.825	0.642		0.907
682	High	Unambiguous	LFESSEHINDTSNLK	[K].LFESSEHINDTSNLK.[T]	1xTMT6plex [K15]; 1xTMT6plex [N-Term]; 1xPhospho [S/T]	1xTMT6plex [K15]; 1xTMT6plex [N-Term]; 1xPhospho [S4(50); S5(50); T11(0); S12(0)]	Q8VD58 1xPhospho [S/T]	Q8VD58 1xPhospho [S295(50); S296(50); T302(0); S303(0)]	0.00016497	0	1.479	1	1	8	Q8VD58	Q8VD58	Protein EVI2B OS=Mus musculus OX=10090 GN=Evi2b PE=1 SV=1	Evi2b	Evi2b_[S295/S296]	YES	Q8VD58	Q8VD58 [292-306]	0	2272.13	15	0	0.852	1.123	0.951	-0.23	0.17	-0.07	0.239086	0.389785	0.723571	0.817599	0.936141	0.998116	4.57	16.21	48.3	9.67543	9.10198	9.96376	0.845	0.767	0.888	0.852	1.025
983	High	Unambiguous	TGSYGALAEISASK	[K].TGSYGALAEISASK.[E]	1xTMT6plex [K14]; 1xTMT6plex [N-Term]; 1xPhospho [S/Y/T]	1xTMT6plex [K14]; 1xTMT6plex [N-Term]; 1xPhospho [T1(2.4); S3(48.8); Y4(48.8); S11(0); S13(0)]	Q9DBR7 1xPhospho [S/Y/T]	Q9DBR7 1xPhospho [T443(2.4); S445(48.8); Y446(48.8); S453(0); S455(0)]	0.000663795	0	1.198	1	1	18	Q9DBR7	Q9DBR7	Protein phosphatase 1 regulatory subunit 12A OS=Mus musculus OX=10090 GN=Ppp1r12a PE=1 SV=2	Ppp1r12a	Ppp1r12a_[S445/Y446]	YES	Q9DBR7	Q9DBR7 [443-456]	0	1892.98	14	0	1.046	1.504	1.243	0.07	0.59	0.31	0.615243	0.00394619	0.450883	0.98968	0.086942	0.973902	12.06	23.79	51.65	7.65607	6.93074	7.92065	1.046	0.921	0.826	1.131	1.088
5530	High	Unambiguous	SPGSNSK	[R].SPGSNSK.[V]	1xTMT6plex [K7]; 1xTMT6plex [N-Term]; 1xPhospho [S1(100)]	1xTMT6plex [K7]; 1xTMT6plex [N-Term]; 1xPhospho [S1(100); S4(0); S6(0)]	Q9ESZ8 1xPhospho [S674(100)]	Q9ESZ8 1xPhospho [S674(100); S677(0); S679(0)]	0.0271609	0.00274619	0.456	1	1	3	Q9ESZ8	Q9ESZ8	General transcription factor II-I OS=Mus musculus OX=10090 GN=Gtf2i PE=1 SV=3	Gtf2i	Gtf2i_S674	NO	Q9ESZ8	Q9ESZ8 [674-680]	0	1214.62	7	0	0.957	0.882	0.743	-0.06	-0.18	-0.43	0.783687	0.382455	0.2111	0.998955	0.93504	0.74466	2.15	1.7	55.37	8.88325	8.49225	9.14287	0.807	0.957	0.973
898	High	Unambiguous	KTNSQDKIEFHNEVDGGK	[K].KTNSQDKIEFHNEVDGGK.[Q]	3xTMT6plex [K1; K7; K18]; 1xTMT6plex [N-Term]; 1xPhospho [S4(99.3)]	3xTMT6plex [K1; K7; K18]; 1xTMT6plex [N-Term]; 1xPhospho [T2(0.7); S4(99.3)]	P06800 1xPhospho [S1229(99.3)]	P06800 1xPhospho [T1227(0.7); S1229(99.3)]	0.000294493	0	1.363	1	1	13	P06800	P06800	Receptor-type tyrosine-protein phosphatase C OS=Mus musculus OX=10090 GN=Ptprc PE=1 SV=4	Ptprc	Ptprc_S1229	YES	P06800	P06800 [1226-1243]	2	3042.61	18	0	0.975	1.235	0.545	-0.04	0.3	-0.87	0.874032	0.095539	0.00653003	0.999182	0.62575	0.066686	8.76	15.62	11.41	9.0677	8.32598	9.60028	0.975	0.596	0.709	0.987	1.035
487	High	Unambiguous	KAEDSDSEPEPEDNVR	[R].KAEDSDSEPEPEDNVR.[L]	1xTMT6plex [K1]; 1xTMT6plex [N-Term]; 2xPhospho [S5(100); S7(100)]	1xTMT6plex [K1]; 1xTMT6plex [N-Term]; 2xPhospho [S5(100); S7(100)]	Q9DBR1 2xPhospho [S499(100); S501(100)]	Q9DBR1 2xPhospho [S499(100); S501(100)]	7.49e-05	0	1.636	1	1	7	Q9DBR1	Q9DBR1	5'-3' exoribonuclease 2 OS=Mus musculus OX=10090 GN=Xrn2 PE=1 SV=1	Xrn2	Xrn2_S499;S501	YES	Q9DBR1	Q9DBR1 [495-510]	1	2435.04	16	0	0.886	0.791	0.745	-0.17	-0.34	-0.42	0.53591	0.164272	0.213042	0.989022	0.763318	0.745205	10.34	16.86	19.76	7.64674	7.74886	8.73775	0.808	0.886	0.992	0.681	0.905
4133	High	Unambiguous	SKPAGSDGER	[K].SKPAGSDGER.[R]	1xTMT6plex [K2]; 1xTMT6plex [N-Term]; 1xPhospho [S6(100)]	1xTMT6plex [K2]; 1xTMT6plex [N-Term]; 1xPhospho [S1(0); S6(100)]	Q00PI9 1xPhospho [S191(100)]	Q00PI9 1xPhospho [S186(0); S191(100)]	0.00416434	0.000677187	0.817	1	1	3	Q00PI9	Q00PI9	Heterogeneous nuclear ribonucleoprotein U-like protein 2 OS=Mus musculus OX=10090 GN=Hnrnpul2 PE=1 SV=2	Hnrnpul2	Hnrnpul2_S191	YES	Q00PI9	Q00PI9 [186-195]	0	1541.77	10	0	0.939	0.967	0.972	-0.09	-0.05	-0.04	0.6697	0.836043	0.797573	0.98968	0.995193	0.998116	0.24	20.72	10.44	9.60307	9.19007	10.1968	0.855	0.939			0.941
4815	High	Unambiguous	GKNSDEEAPK	[K].GKNSDEEAPK.[A]	2xTMT6plex [K2; K10]; 1xTMT6plex [N-Term]; 1xPhospho [S4(100)]	2xTMT6plex [K2; K10]; 1xTMT6plex [N-Term]; 1xPhospho [S4(100)]	Q8C0D7 1xPhospho [S150(100)]	Q8C0D7 1xPhospho [S150(100)]	0.00984763	0.00104172	0.646	1	1	4	Q8C0D7	Q8C0D7	Inhibitor of growth protein 4 OS=Mus musculus OX=10090 GN=Ing4 PE=1 SV=2	Ing4	Ing4_S150	YES	Q8C0D7	Q8C0D7 [147-156]	1	1841.96	10	0	0.943	0.913	1.158	-0.08	-0.13	0.21	0.716752	0.528788	0.651616	0.990459	0.972296	0.998116	21.42	13.97	23.09	9.57416	9.37006	9.54766	0.803		1.148	0.802	1.108
505	High	Unambiguous	KLEKEEEEGISQESSEEEQ	[K].KLEKEEEEGISQESSEEEQ.[-]	2xTMT6plex [K1; K4]; 1xTMT6plex [N-Term]; 1xPhospho [S]	2xTMT6plex [K1; K4]; 1xTMT6plex [N-Term]; 1xPhospho [S11(0); S14(50); S15(50)]	P17095 1xPhospho [S]	P17095 1xPhospho [S99(0); S102(50); S103(50)]	4.24e-05	0	1.749	1	1	43	P17095	P17095	High mobility group protein HMG-I/HMG-Y OS=Mus musculus OX=10090 GN=Hmga1 PE=1 SV=4	Hmga1	Hmga1_[S102/S103]	YES	P17095	P17095 [89-107]	2	3004.45	19	0	0.868	1.019	0.828	-0.2	0.03	-0.27	0.294367	0.852087	0.33955	0.87243	0.995193	0.912077	14.2	11.82	14.66	10.4561	10.1629	10.9115	0.734	0.978	0.743	0.868	0.971
3271	High	Unambiguous	LDSPTLSR	[K].LDSPTLSR.[A]	1xTMT6plex [N-Term]; 1xPhospho [S3(100)]	1xTMT6plex [N-Term]; 1xPhospho [S3(100); T5(0); S7(0)]	Q61165 1xPhospho [S697(100)]	Q61165 1xPhospho [S697(100); T699(0); S701(0)]	0.00120939	0.000209709	1.074	1	1	9	Q61165	Q61165	Sodium/hydrogen exchanger 1 OS=Mus musculus OX=10090 GN=Slc9a1 PE=1 SV=1	Slc9a1	Slc9a1_S697	YES	Q61165	Q61165 [695-702]	0	1197.61	8	0	0.878	1.029	0.872	-0.19	0.04	-0.2	0.39361	0.83278	0.500658	0.944049	0.995193	0.984677	3.97	24.28	18.9	9.34629	8.88264	9.79701	0.878	0.847	0.659	0.879	0.998
3889	High	Unambiguous	LLSPIASNR	[R].LLSPIASNR.[L]	1xTMT6plex [N-Term]; 1xPhospho [S7(94.2)]	1xTMT6plex [N-Term]; 1xPhospho [S3(5.8); S7(94.2)]	Q9CW46 1xPhospho [S580(94.2)]	Q9CW46 1xPhospho [S576(5.8); S580(94.2)]	0.00244829	0.000530845	0.927	1	1	9	Q9CW46	Q9CW46	Ribonucleoprotein PTB-binding 1 OS=Mus musculus OX=10090 GN=Raver1 PE=1 SV=2	Raver1	Raver1_S576	YES	Q9CW46	Q9CW46 [574-582]	0	1279.7	9	0	0.841	1.042	1.395	-0.25	0.06	0.48	0.226715	0.736274	0.211849	0.807815	0.99264	0.74466	3.24	28.59	8.92	9.72127	9.34296	9.57042	0.866	0.841	0.501	0.969	0.818
3071	High	Unambiguous	SLSDSESDDSK	[K].SLSDSESDDSK.[S]	1xTMT6plex [K11]; 1xTMT6plex [N-Term]; 2xPhospho [S3(95); S7(100)]	1xTMT6plex [K11]; 1xTMT6plex [N-Term]; 2xPhospho [S1(0); S3(95); S5(5); S7(100); S10(0)]	P23198 2xPhospho [S95(95); S99(100)]	P23198 2xPhospho [S93(0); S95(95); S97(5); S99(100); S102(0)]	0.000790718	0.000209709	1.162	1	1	4	P23198	P23198	Chromobox protein homolog 3 OS=Mus musculus OX=10090 GN=Cbx3 PE=1 SV=2	Cbx3	Cbx3_S93;S95	YES	P23198	P23198 [93-103]	0	1787.74	11	0	0.716	0.984	0.713	-0.48	-0.02	-0.49	0.0300083	0.971352	0.147498	0.259492	0.998927	0.618726	2.49	2.17	0.71	8.23314	7.47897	8.67666	0.919	0.716	0.692
298	High	Unambiguous	RDSWSYVNSK	[R].RDSWSYVNSK.[S]	1xTMT6plex [K10]; 1xTMT6plex [N-Term]; 1xPhospho [S3(100)]	1xTMT6plex [K10]; 1xTMT6plex [N-Term]; 1xPhospho [S3(100); S5(0); Y6(0); S9(0)]	Q00651 1xPhospho [S1028(100)]	Q00651 1xPhospho [S1028(100); S1030(0); Y1031(0); S1034(0)]	0.000106034	0	1.567	1	1	6	Q00651	Q00651	Integrin alpha-4 OS=Mus musculus OX=10090 GN=Itga4 PE=1 SV=1	Itga4	Itga4_S1028	YES	Q00651	Q00651 [1026-1035]	1	1779.88	10	0	0.712	1.202	0.922	-0.49	0.27	-0.12	0.0214281	0.220245	0.652346	0.206432	0.828842	0.998116	17.46	28.11	47.66	8.72894	8.17941	8.84141	0.546	0.683	0.712	0.894	1.244
3408	High	Unambiguous	TNTNVNCPIECFMPLDVQADRDDSRE	[R].TNTNVNCPIECFMPLDVQADRDDSRE.[-]	2xCarbamidomethyl [C7; C11]; 1xTMT6plex [N-Term]; 1xPhospho [S24(100)]	2xCarbamidomethyl [C7; C11]; 1xTMT6plex [N-Term]; 1xPhospho [T1(0); T3(0); S24(100)]	P11276 1xPhospho [S2475(100)]	P11276 1xPhospho [T2452(0); T2454(0); S2475(100)]	0.0014517	0.000404169	1.036	1	1	3	P11276	P11276	Fibronectin OS=Mus musculus OX=10090 GN=Fn1 PE=1 SV=4	Fn1	Fn1_S2475	YES	P11276	P11276 [2452-2477]	2	3405.47	26	0	0.713	0.882	1.06	-0.49	-0.18	0.08	0.0438426	0.499723	0.847396	0.332915	0.965376	0.998116	13.19	10.47	17.17	7.90147	7.66391	7.848	0.542		0.713		0.838
578	High	Unambiguous	HAFSPVASVESASGETLHSPK	[R].HAFSPVASVESASGETLHSPK.[V]	1xTMT6plex [K21]; 1xTMT6plex [N-Term]; 1xPhospho [S11(99.6)]	1xTMT6plex [K21]; 1xTMT6plex [N-Term]; 1xPhospho [S4(0); S8(0); S11(99.6); S13(0.4); T16(0); S19(0)]	P29699 1xPhospho [S312(99.6)]	P29699 1xPhospho [S305(0); S309(0); S312(99.6); S314(0.4); T317(0); S320(0)]	6.69e-08	0	3.027	1	1	31	P29699	P29699	Alpha-2-HS-glycoprotein OS=Mus musculus OX=10090 GN=Ahsg PE=1 SV=1	Ahsg	Ahsg_S312	YES	P29699	P29699 [302-322]	0	2676.34	21	0	0.694	1.229	0.828	-0.53	0.3	-0.27	0.00960349	0.0700877	0.339422	0.114056	0.544164	0.912077	8.37	24.79	35.29	10.3979	9.88707	10.6641	0.505	0.716	0.694	0.613	1.062
1981	High	Unambiguous	SMGTGDSAGVEVPSSPLRR	[R].SMGTGDSAGVEVPSSPLRR.[T]	1xOxidation [M2]; 1xTMT6plex [N-Term]; 1xPhospho [S15(94.1)]	1xOxidation [M2]; 1xTMT6plex [N-Term]; 1xPhospho [S1(0); T4(0); S7(0); S14(5.9); S15(94.1)]	Q80YV2 1xPhospho [S394(94.1)]	Q80YV2 1xPhospho [S380(0); T383(0); S386(0); S393(5.9); S394(94.1)]	0.00033675	0	1.336	1	1	6	Q80YV2	Q80YV2	Nuclear-interacting partner of ALK OS=Mus musculus OX=10090 GN=Zc3hc1 PE=1 SV=1	Zc3hc1	Zc3hc1_S393	YES	Q80YV2	Q80YV2 [380-398]	1	2228.06	19	0	0.885	1.014	0.95	-0.18	0.02	-0.07	0.505309	0.826431	0.77247	0.979989	0.994856	0.998116	12.81	1.62	10.13	7.90689	7.59096	8.15937	0.567	0.973	0.885	0.787	1.041
3780	High	Unambiguous	KDSVPQVLLPEEEK	[R].KDSVPQVLLPEEEK.[L]	2xTMT6plex [K1; K14]; 1xTMT6plex [N-Term]; 1xPhospho [S3(100)]	2xTMT6plex [K1; K14]; 1xTMT6plex [N-Term]; 1xPhospho [S3(100)]	Q8K4I3 1xPhospho [S679(100)]	Q8K4I3 1xPhospho [S679(100)]	0.00211021	0.000530845	0.958	1	1	4	Q8K4I3	Q8K4I3	Rho guanine nucleotide exchange factor 6 OS=Mus musculus OX=10090 GN=Arhgef6 PE=1 SV=1	Arhgef6	Arhgef6_S679	YES	Q8K4I3	Q8K4I3 [677-690]	1	2378.32	14	0	0.829	1.047	0.587	-0.27	0.07	-0.77	0.293527	0.73379	0.0312681	0.87243	0.99264	0.228528	16.18	27.07	28.6	8.13513	7.19724	8.70534	0.945	0.681	0.728		1.076
5602	High	Unambiguous	GTGASGSFK	[K].GTGASGSFK.[L]	1xTMT6plex [K9]; 1xTMT6plex [N-Term]; 1xPhospho [S5(92)]	1xTMT6plex [K9]; 1xTMT6plex [N-Term]; 1xPhospho [T2(0); S5(92); S7(8)]	P43274 1xPhospho [S102(92)]; P43276 1xPhospho [S102(92)]; P15864 1xPhospho [S102(92)]; P43277 1xPhospho [S103(92)]	P43274 1xPhospho [T99(0); S102(92); S104(8)]; P43276 1xPhospho [T99(0); S102(92); S104(8)]; P15864 1xPhospho [T99(0); S102(92); S104(8)]; P43277 1xPhospho [T100(0); S103(92); S105(8)]	0.0280614	0.00285375	0.45	4	5	3	P43274; P43276; P15864; P43277	P43274	Histone H1.4 OS=Mus musculus OX=10090 GN=Hist1h1e PE=1 SV=2;Histone H1.5 OS=Mus musculus OX=10090 GN=Hist1h1b PE=1 SV=2;Histone H1.2 OS=Mus musculus OX=10090 GN=Hist1h1c PE=1 SV=2;Histone H1.3 OS=Mus musculus OX=10090 GN=Hist1h1d PE=1 SV=2	Hist1h1e	Hist1h1e_S102	YES	P43274; P43276; P15864; Q07133; P43277	P43274 [98-106]; P43276 [98-106]; P15864 [98-106]; P43277 [99-107]	0	1349.69	9	0	0.37	0.934	0.89	-1.43	-0.1	-0.17	3.94e-12	0.599463	0.503793	4.16e-10	0.983853	0.98569	0.62	21.33	44.48	10.363	9.86635	9.68545	0.359		0.37		0.395
719	High	Unambiguous	LATSSPEQSWPSTFK	[R].LATSSPEQSWPSTFK.[A]	1xTMT6plex [K15]; 1xTMT6plex [N-Term]; 2xPhospho [S4(94.9); S5(94.9)]	1xTMT6plex [K15]; 1xTMT6plex [N-Term]; 2xPhospho [T3(10.2); S4(94.9); S5(94.9); S9(0); S12(0); T13(0)]	Q60953 2xPhospho [S514(94.9); S515(94.9)]	Q60953 2xPhospho [T513(10.2); S514(94.9); S515(94.9); S519(0); S522(0); T523(0)]	0.000371825	0	1.316	1	1	18	Q60953	Q60953	Protein PML OS=Mus musculus OX=10090 GN=Pml PE=1 SV=3	Pml	Pml_S515;[T513/S514]	YES	Q60953	Q60953 [511-525]	0	2284.07	15	0	0.981	0.821	0.754	-0.03	-0.28	-0.41	0.901383	0.193991	0.187403	0.999853	0.799742	0.703983	6.99	2.13	23.3	8.57721	8.12874	9.40883	1.037	0.943	0.828	1.021
4755	High	Unambiguous	EFTGSPPPSATKK	[R].EFTGSPPPSATKK.[D]	2xTMT6plex [K12; K13]; 1xTMT6plex [N-Term]; 1xPhospho [T/S]	2xTMT6plex [K12; K13]; 1xTMT6plex [N-Term]; 1xPhospho [T3(50); S5(50); S9(0); T11(0)]	Q80XQ2 1xPhospho [T/S]	Q80XQ2 1xPhospho [T576(50); S578(50); S582(0); T584(0)]	0.00556833	0.000907142	0.758	1	1	6	Q80XQ2	Q80XQ2	TBC1 domain family member 5 OS=Mus musculus OX=10090 GN=Tbc1d5 PE=1 SV=2	Tbc1d5	Tbc1d5_S578	YES	Q80XQ2	Q80XQ2 [574-586]	1	2114.15	13	0	0.93	1.278	1.151	-0.1	0.35	0.2	0.570846	0.0569296	0.632944	0.98968	0.486204	0.997562	10.84	26.1	50.26	10.0467	8.68299	10.0356		1.067	0.851	0.93
6225	High	Unambiguous	GSYGYIK	[R].GSYGYIK.[T]	1xTMT6plex [K7]; 1xTMT6plex [N-Term]; 1xPhospho [S2(99.8)]	1xTMT6plex [K7]; 1xTMT6plex [N-Term]; 1xPhospho [S2(99.8); Y3(0.2); Y5(0)]	O35601 1xPhospho [S546(99.8)]	O35601 1xPhospho [S546(99.8); Y547(0.2); Y549(0)]	0.0682457	0.00638897	0.291	1	1	4	O35601	O35601	FYN-binding protein 1 OS=Mus musculus OX=10090 GN=Fyb1 PE=1 SV=2	Fyb1	Fyb1_S546	YES	O35601	O35601 [545-551]	0	1325.69	7	0	0.716	1.223	0.614	-0.48	0.29	-0.7	0.0175382	0.138856	0.0243397	0.179177	0.720931	0.188509	1.8	40.89	16.3	10.2593	9.17443	10.6938	0.459	0.733	0.716
1182	High	Unambiguous	SYSSPDITQALQEEEK	[R].SYSSPDITQALQEEEK.[R]	1xTMT6plex [K16]; 1xTMT6plex [N-Term]; 1xPhospho [S3(95.5)]	1xTMT6plex [K16]; 1xTMT6plex [N-Term]; 1xPhospho [S1(0.2); Y2(0.2); S3(95.5); S4(4.2); T8(0)]	Q80U87 1xPhospho [S680(95.5)]	Q80U87 1xPhospho [S678(0.2); Y679(0.2); S680(95.5); S681(4.2); T685(0)]	8.37e-05	0	1.614	1	1	12	Q80U87	Q80U87	Ubiquitin carboxyl-terminal hydrolase 8 OS=Mus musculus OX=10090 GN=Usp8 PE=1 SV=2	Usp8	Usp8_S680	YES	Q80U87	Q80U87 [678-693]	0	2363.14	16	0	0.703	0.851	0.622	-0.51	-0.23	-0.68	0.0841769	0.464449	0.0734463	0.50301	0.964738	0.41042	10.12	13.82	15.51	5.59395	5.60288	6.46434	0.606		1.018	0.703
2299	High	Unambiguous	EGEEPTVYSDDEEPKDETAR	[K].EGEEPTVYSDDEEPKDETAR.[K]	1xTMT6plex [K15]; 1xTMT6plex [N-Term]; 1xPhospho [S9(99.9)]	1xTMT6plex [K15]; 1xTMT6plex [N-Term]; 1xPhospho [T6(0); Y8(0.1); S9(99.9); T18(0)]	O55022 1xPhospho [S181(99.9)]	O55022 1xPhospho [T178(0); Y180(0.1); S181(99.9); T190(0)]	1.57e-05	0	1.946	1	1	13	O55022	O55022	Membrane-associated progesterone receptor component 1 OS=Mus musculus OX=10090 GN=Pgrmc1 PE=1 SV=4	Pgrmc1	Pgrmc1_S181	YES	O55022	O55022 [173-192]	1	2834.27	20	0	0.935	1.016	0.837	-0.1	0.02	-0.26	0.651985	0.860898	0.364886	0.98968	0.996046	0.928086	3.31	19.72	25.41	9.84439	9.90899	10.7525	0.935	0.911	0.974	0.75	0.952
870	High	Unambiguous	IACEEEFSDSDEEGEGGRK	[R].IACEEEFSDSDEEGEGGRK.[N]	1xCarbamidomethyl [C3]; 1xTMT6plex [K19]; 1xTMT6plex [N-Term]; 2xPhospho [S8(100); S10(100)]	1xCarbamidomethyl [C3]; 1xTMT6plex [K19]; 1xTMT6plex [N-Term]; 2xPhospho [S8(100); S10(100)]	O09106 2xPhospho [S421(100); S423(100)]	O09106 2xPhospho [S421(100); S423(100)]	8.23e-06	0	2.074	1	1	8	O09106	O09106	Histone deacetylase 1 OS=Mus musculus OX=10090 GN=Hdac1 PE=1 SV=1	Hdac1	Hdac1_S421;S423	YES	O09106	O09106 [414-432]	1	2762.13	19	0	0.929	0.94	0.943	-0.11	-0.09	-0.08	0.638119	0.657289	0.676285	0.98968	0.99264	0.998116	14.15	2.42	12.08	9.53741	9.53935	9.63771	0.668	0.976	1.032	0.929	0.787
2594	High	Unambiguous	ATAPQTQHVSPMR	[R].ATAPQTQHVSPMR.[Q]	1xTMT6plex [N-Term]; 1xPhospho [S10(100)]	1xTMT6plex [N-Term]; 1xPhospho [T2(0); T6(0); S10(100)]	P57776 1xPhospho [S133(100)]	P57776 1xPhospho [T125(0); T129(0); S133(100)]	9.97e-07	0	2.492	1	1	9	P57776	P57776	Elongation factor 1-delta OS=Mus musculus OX=10090 GN=Eef1d PE=1 SV=3	Eef1d	Eef1d_S133	YES	P57776	P57776 [124-136]	0	1732.84	13	0	0.667	0.953	1.178	-0.58	-0.07	0.24	0.00588321	0.73562	0.618354	0.0783157	0.99264	0.997562	8.96	4.87	24.71	9.76105	8.66178	9.44025	0.667	0.619	0.577	0.964	1.169
2400	High	Unambiguous	AKEVENEQTPVSEPEEEKGSQPGPPVER	[K].AKEVENEQTPVSEPEEEKGSQPGPPVER.[Q]	2xTMT6plex [K2; K18]; 1xTMT6plex [N-Term]; 1xPhospho [S12(100)]	2xTMT6plex [K2; K18]; 1xTMT6plex [N-Term]; 1xPhospho [T9(0); S12(100); S20(0)]	O70318 1xPhospho [S38(100)]	O70318 1xPhospho [T35(0); S38(100); S46(0)]	1.53e-05	0	1.951	1	1	8	O70318	O70318	Band 4.1-like protein 2 OS=Mus musculus OX=10090 GN=Epb41l2 PE=1 SV=2	Epb41l2	Epb41l2_S38	YES	O70318	O70318 [27-54]	2	3843.93	28	0	0.944	0.914	1.032	-0.08	-0.13	0.05	0.711316	0.50079	0.993817	0.989834	0.965376	0.999899	17.49	12.48	56.19	8.85518	8.85175	9.20506	0.463	1.125	1.069	0.944	0.884
3769	High	Unambiguous	SETAPAAPAAPAPAEK	[M].SETAPAAPAAPAPAEK.[T]	1xAcetyl [N-Term]; 1xTMT6plex [K16]; 1xTMT6plex [N-Term]; 1xPhospho [S1(91.2)]	1xAcetyl [N-Term]; 1xTMT6plex [K16]; 1xTMT6plex [N-Term]; 1xPhospho [S1(91.2); T3(8.8)]	P43274 1xAcetyl [N-Term]; 1xPhospho [S2(91.2)]	P43274 1xAcetyl [N-Term]; 1xPhospho [S2(91.2); T4(8.8)]	0.00217177	0.000530845	0.952	1	1	14	P43274	P43274	Histone H1.4 OS=Mus musculus OX=10090 GN=Hist1h1e PE=1 SV=2	Hist1h1e	Hist1h1e_S2	YES	P43274	P43274 [2-17]	0	2059.05	16	0	0.91	0.98	0.444	-0.14	-0.03	-1.17	0.503695	0.903597	0.000250867	0.979989	0.997038	0.0043977	6.02	32.9	10.64	9.70338	8.91797	10.3844	0.839	0.91	0.955
1399	High	Unambiguous	VLLHSPGRPSSPR	[R].VLLHSPGRPSSPR.[F]	1xTMT6plex [N-Term]; 2xPhospho [S5(99.7); S]	1xTMT6plex [N-Term]; 2xPhospho [S5(99.7); S10(50.1); S11(50.1)]	Q8R1G6 2xPhospho [S199(99.7); S]	Q8R1G6 2xPhospho [S199(99.7); S204(50.1); S205(50.1)]	0.000105502	0	1.568	1	1	17	Q8R1G6	Q8R1G6	PDZ and LIM domain protein 2 OS=Mus musculus OX=10090 GN=Pdlim2 PE=1 SV=1	Pdlim2	Pdlim2_S199;[S204/S205]	YES	Q8R1G6	Q8R1G6 [195-207]	0	1791.89	13	0	0.763	0.938	0.787	-0.39	-0.09	-0.35	0.0591847	0.656559	0.238823	0.40638	0.99264	0.792359	9.5	24.12	6.39	9.87452	9.30218	10.0678	0.763	0.679	0.718	0.909	0.928
24	High	Unambiguous	MKSSSSVTTSEAHPSTPCSSDDSDLER	[R].MKSSSSVTTSEAHPSTPCSSDDSDLER.[V]	1xCarbamidomethyl [C18]; 1xOxidation [M1]; 1xTMT6plex [K2]; 1xTMT6plex [N-Term]; 1xPhospho [S3(98.4)]	1xCarbamidomethyl [C18]; 1xOxidation [M1]; 1xTMT6plex [K2]; 1xTMT6plex [N-Term]; 1xPhospho [S3(98.4); S4(1.4); S5(0.2); S6(0); T8(0); T9(0); S10(0); S15(0); T16(0); S19(0); S20(0); S23(0)]	P70460 1xPhospho [S317(98.4)]	P70460 1xPhospho [S317(98.4); S318(1.4); S319(0.2); S320(0); T322(0); T323(0); S324(0); S329(0); T330(0); S333(0); S334(0); S337(0)]	0.000545972	0	1.238	1	1	14	P70460	P70460	Vasodilator-stimulated phosphoprotein OS=Mus musculus OX=10090 GN=Vasp PE=1 SV=4	Vasp	Vasp_S317	YES	P70460	P70460 [315-341]	1	3452.52	27	0	1.109	1.121	1.319	0.15	0.16	0.4	0.437827	0.335887	0.368753	0.966355	0.914734	0.930918	14.45	27.61	72.65	8.8716	8.35447	9.23577	1.109	1.28	1.001	1.108	1.31
4070	High	Unambiguous	SHSAEGGK	[R].SHSAEGGK.[H]	1xTMT6plex [K8]; 1xTMT6plex [N-Term]; 1xPhospho [S3(100)]	1xTMT6plex [K8]; 1xTMT6plex [N-Term]; 1xPhospho [S1(0); S3(100)]	P24788 1xPhospho [S115(100)]	P24788 1xPhospho [S113(0); S115(100)]	0.00406401	0.000677187	0.822	1	1	8	P24788	P24788	Cyclin-dependent kinase 11B OS=Mus musculus OX=10090 GN=Cdk11b PE=1 SV=2	Cdk11b	Cdk11b_S115	YES	P24788	P24788 [113-120]	0	1310.65	8	0	0.895	0.996	1.071	-0.16	-0.01	0.1	0.403854	0.989689	0.870127	0.947729	0.999874	0.998116	19.22	15.61	14.7	10.7626	9.9132	10.8883	1.036	1.129	0.746	0.774
2177	High	Unambiguous	ESDDKPEIEDVGSDEEEEEK	[K].ESDDKPEIEDVGSDEEEEEK.[K]	2xTMT6plex [K5; K20]; 1xTMT6plex [N-Term]; 1xPhospho [S13(100)]	2xTMT6plex [K5; K20]; 1xTMT6plex [N-Term]; 1xPhospho [S2(0); S13(100)]	P07901 1xPhospho [S263(100)]	P07901 1xPhospho [S252(0); S263(100)]	0.000188869	0	1.452	1	1	4	P07901	P07901	Heat shock protein HSP 90-alpha OS=Mus musculus OX=10090 GN=Hsp90aa1 PE=1 SV=4	Hsp90aa1	Hsp90aa1_S263	NO	P07901	P07901 [251-270]	0	3075.4	20	0	0.791	0.979	0.265	-0.34	-0.03	-1.92	0.112388	0.938759	8.85e-09	0.589958	0.997187	3.69e-07	16.82	68.09	2.64	8.56758	8.3097	9.85502	0.935	0.584	0.791
1510	High	Unambiguous	SETAPVAQAASTATEKPAAAK	[M].SETAPVAQAASTATEKPAAAK.[K]	1xAcetyl [N-Term]; 2xTMT6plex [K16; K21]; 1xTMT6plex [N-Term]; 1xPhospho [S1(88.5)]	1xAcetyl [N-Term]; 2xTMT6plex [K16; K21]; 1xTMT6plex [N-Term]; 1xPhospho [S1(88.5); T3(11.5); S11(0); T12(0); T14(0)]	P43275 1xAcetyl [N-Term]; 1xPhospho [S2(88.5)]	P43275 1xAcetyl [N-Term]; 1xPhospho [S2(88.5); T4(11.5); S12(0); T13(0); T15(0)]	4.03e-05	0	1.759	1	1	12	P43275	P43275	Histone H1.1 OS=Mus musculus OX=10090 GN=Hist1h1a PE=1 SV=2	Hist1h1a	Hist1h1a_S2	YES	P43275	P43275 [2-22]	0	2809.5	21	0	0.826	0.917	0.842	-0.28	-0.12	-0.25	0.212375	0.532277	0.418012	0.788597	0.972426	0.959155	12.37	28.25	15.95	8.29002	7.39746	8.66213	0.716	0.927	1.267	0.757	0.826
1087	High	Unambiguous	SSSSCNDLYATVK	[R].SSSSCNDLYATVK.[D]	1xCarbamidomethyl [C5]; 1xTMT6plex [K13]; 1xTMT6plex [N-Term]; 1xPhospho [S4(94.3)]	1xCarbamidomethyl [C5]; 1xTMT6plex [K13]; 1xTMT6plex [N-Term]; 1xPhospho [S1(5.1); S2(0.3); S3(0.3); S4(94.3); Y9(0); T11(0)]	Q3U1F9 1xPhospho [S351(94.3)]	Q3U1F9 1xPhospho [S348(5.1); S349(0.3); S350(0.3); S351(94.3); Y356(0); T358(0)]	6.03e-05	0	1.679	1	1	9	Q3U1F9	Q3U1F9	Phosphoprotein associated with glycosphingolipid-enriched microdomains 1 OS=Mus musculus OX=10090 GN=Pag1 PE=1 SV=2	Pag1	Pag1_[S348/S351]	YES	Q3U1F9	Q3U1F9 [348-360]	0	1969.93	13	0	1.051	0.965	0.975	0.07	-0.05	-0.04	0.697226	0.827991	0.780643	0.98968	0.995193	0.998116	13.48	8.99	30.08	8.73302	8.1533	8.71287	1.051	1.184	0.901	1.049	1.147
3838	High	Unambiguous	KADREQSPVSK	[K].KADREQSPVSK.[T]	2xTMT6plex [K1; K11]; 1xTMT6plex [N-Term]; 1xPhospho [S7(100)]	2xTMT6plex [K1; K11]; 1xTMT6plex [N-Term]; 1xPhospho [S7(100); S10(0)]	A2AR02 1xPhospho [S685(100)]	A2AR02 1xPhospho [S685(100); S688(0)]	0.00206024	0.000530845	0.963	1	1	9	A2AR02	A2AR02	Peptidyl-prolyl cis-trans isomerase G OS=Mus musculus OX=10090 GN=Ppig PE=1 SV=1	Ppig	Ppig_S685	YES	A2AR02	A2AR02 [679-689]	2	2012.11	11	0	0.997	1.076	1.18	0	0.11	0.24	0.925905	0.478745	0.558773	0.999853	0.965376	0.996923	24.01	44.88	66.32	11.165	9.78937	11.3235	0.267	1.423	0.834	1.017	0.997
1919	High	Unambiguous	SHSITNMETGGLK	[K].SHSITNMETGGLK.[I]	1xOxidation [M7]; 1xTMT6plex [K13]; 1xTMT6plex [N-Term]; 1xPhospho [S3(92)]	1xOxidation [M7]; 1xTMT6plex [K13]; 1xTMT6plex [N-Term]; 1xPhospho [S1(4); S3(92); T5(4); T9(0)]	Q80TH2 1xPhospho [S869(92)]	Q80TH2 1xPhospho [S867(4); S869(92); T871(4); T875(0)]	4.09e-05	0	1.756	1	1	11	Q80TH2	Q80TH2	Erbin OS=Mus musculus OX=10090 GN=Erbin PE=1 SV=3	Erbin	Erbin_S869	YES	Q80TH2	Q80TH2 [867-879]	0	1928.96	13	0	1.176	1.108	1.322	0.23	0.15	0.4	0.244115	0.509605	0.374818	0.822116	0.970257	0.932547	9.56	7.66	48.79	8.73573	8.03837	8.54574	1.176	1.014	0.92	1.252	1.231
3603	High	Unambiguous	TEEVLSPDGSPSKSPSK	[R].TEEVLSPDGSPSKSPSK.[K]	2xTMT6plex [K13; K17]; 1xTMT6plex [N-Term]; 1xPhospho [S14(98.8)]	2xTMT6plex [K13; K17]; 1xTMT6plex [N-Term]; 1xPhospho [T1(0); S6(0); S10(0.1); S12(1); S14(98.8); S16(0.1)]	Q9QYB5 1xPhospho [S681(98.8)]	Q9QYB5 1xPhospho [T668(0); S673(0); S677(0.1); S679(1); S681(98.8); S683(0.1)]	0.0017254	0.000530845	1	1	1	9	Q9QYB5	Q9QYB5	Gamma-adducin OS=Mus musculus OX=10090 GN=Add3 PE=1 SV=2	Add3	Add3_S681	YES	Q9QYB5	Q9QYB5 [668-684]	1	2512.32	17	0	0.97	1.115	0.962	-0.04	0.16	-0.06	0.841726	0.403487	0.763738	0.999182	0.940545	0.998116	10.83	16.36	30.62	9.60899	9.23745	10.2812	1.242	0.97	0.956	0.895	1.1
1966	High	Unambiguous	SLSEQPVVDTATATEQAK	[R].SLSEQPVVDTATATEQAK.[Q]	1xTMT6plex [K18]; 1xTMT6plex [N-Term]; 1xPhospho [S3(99.7)]	1xTMT6plex [K18]; 1xTMT6plex [N-Term]; 1xPhospho [S1(0.3); S3(99.7); T10(0); T12(0); T14(0)]	P19426 1xPhospho [S51(99.7)]	P19426 1xPhospho [S49(0.3); S51(99.7); T58(0); T60(0); T62(0)]	2.84e-06	0	2.285	1	1	10	P19426	P19426	Negative elongation factor E OS=Mus musculus OX=10090 GN=Nelfe PE=1 SV=2	Nelfe	Nelfe_S51	YES	P19426	P19426 [49-66]	0	2413.23	18	0	0.95	1.085	1.057	-0.07	0.12	0.08	0.885838	0.542463	0.887026	0.999182	0.977655	0.99921	22.32	21.53	18	7.74349	7.24793	7.8936	0.791	1.259	0.662	1.055	0.95
3141	High	Unambiguous	LVEQANSPK	[K].LVEQANSPK.[H]	1xTMT6plex [K9]; 1xTMT6plex [N-Term]; 1xPhospho [S7(100)]	1xTMT6plex [K9]; 1xTMT6plex [N-Term]; 1xPhospho [S7(100)]	Q8BHJ9 1xPhospho [S215(100)]	Q8BHJ9 1xPhospho [S215(100)]	0.00109308	0.000209709	1.095	1	1	6	Q8BHJ9	Q8BHJ9	Pre-mRNA-splicing factor SLU7 OS=Mus musculus OX=10090 GN=Slu7 PE=1 SV=1	Slu7	Slu7_S215	YES	Q8BHJ9	Q8BHJ9 [209-217]	0	1523.82	9	0	0.846	1.031	1.146	-0.24	0.04	0.2	0.218952	0.780804	0.645436	0.795691	0.99409	0.998116	19.25	11.21	14.45	10.3199	9.41912	10.4452	0.779	0.999	0.669	0.846	1.033
4293	High	Unambiguous	SPSLSPSPPSPIEK	[K].SPSLSPSPPSPIEK.[T]	1xTMT6plex [K14]; 1xTMT6plex [N-Term]; 1xPhospho [S10(100)]	1xTMT6plex [K14]; 1xTMT6plex [N-Term]; 1xPhospho [S1(0); S3(0); S5(0); S7(0); S10(100)]	P14873 1xPhospho [S1260(100)]	P14873 1xPhospho [S1251(0); S1253(0); S1255(0); S1257(0); S1260(100)]	0.00452549	0.000818925	0.8	1	1	3	P14873	P14873	Microtubule-associated protein 1B OS=Mus musculus OX=10090 GN=Map1b PE=1 SV=2	Map1b	Map1b_S1260	YES	P14873	P14873 [1251-1264]	0	1961.04	14	0	0.82	0.997	0.932	-0.29	0	-0.1	0.252247	0.926913	0.653759	0.832899	0.997187	0.998116	0.65	5.82	17.62	8.08587	7.56301	8.24031	0.727		0.825		0.82
4650	High	Unambiguous	RLSPVEK	[R].RLSPVEK.[A]	1xTMT6plex [K7]; 1xTMT6plex [N-Term]; 1xPhospho [S3(100)]	1xTMT6plex [K7]; 1xTMT6plex [N-Term]; 1xPhospho [S3(100)]	P97360 1xPhospho [S215(100)]	P97360 1xPhospho [S215(100)]	0.00804993	0.000907142	0.685	1	1	5	P97360	P97360	Transcription factor ETV6 OS=Mus musculus OX=10090 GN=Etv6 PE=1 SV=1	Etv6	Etv6_S215	YES	P97360	P97360 [213-219]	1	1366.79	7	0	0.795	0.843	0.751	-0.33	-0.25	-0.41	0.115137	0.289301	0.208222	0.599014	0.892274	0.743048	7.49	7.97	18.52	8.51393	7.78237	8.68438	0.754	0.917	0.712		0.839
485	High	Unambiguous	KASPEPPDSAESALK	[R].KASPEPPDSAESALK.[L]	2xTMT6plex [K1; K15]; 1xTMT6plex [N-Term]; 1xPhospho [S3(100)]	2xTMT6plex [K1; K15]; 1xTMT6plex [N-Term]; 1xPhospho [S3(100); S9(0); S12(0)]	Q8K3X4 1xPhospho [S526(100)]	Q8K3X4 1xPhospho [S526(100); S532(0); S535(0)]	7.75e-07	0	2.542	1	1	6	Q8K3X4	Q8K3X4	Interferon regulatory factor 2-binding protein-like OS=Mus musculus OX=10090 GN=Irf2bpl PE=1 SV=1	Irf2bpl	Irf2bpl_S526	YES	Q8K3X4	Q8K3X4 [524-538]	1	2294.22	15	0	0.886	0.886	0.76	-0.17	-0.17	-0.4	0.364428	0.343708	0.183507	0.921043	0.919579	0.698014	4.16	3.58	35.22	10.165	9.83826	10.6762	0.854		0.973	0.886
1209	High	Unambiguous	VSSLSPEQEQGLWK	[K].VSSLSPEQEQGLWK.[Q]	1xTMT6plex [K14]; 1xTMT6plex [N-Term]; 1xPhospho [S5(100)]	1xTMT6plex [K14]; 1xTMT6plex [N-Term]; 1xPhospho [S2(0); S3(0); S5(100)]	Q80XP8 1xPhospho [S193(100)]	Q80XP8 1xPhospho [S190(0); S191(0); S193(100)]	1.9e-05	0	1.908	1	1	7	Q80XP8	Q80XP8	Protein FAM76B OS=Mus musculus OX=10090 GN=Fam76b PE=1 SV=1	Fam76b	Fam76b_S193	YES	Q80XP8	Q80XP8 [189-202]	0	2126.09	14	0	1.052	0.924	0.537	0.07	-0.11	-0.9	0.633239	0.678092	0.0111238	0.98968	0.99264	0.102782	4.75	20.55	9.98	6.75489	6.62205	7.21917	0.893			1.052	1.086
2584	High	Unambiguous	ASSSADVGISKSTEDLSPQR	[K].ASSSADVGISKSTEDLSPQR.[S]	1xTMT6plex [K11]; 1xTMT6plex [N-Term]; 1xPhospho [S12(98.5)]	1xTMT6plex [K11]; 1xTMT6plex [N-Term]; 1xPhospho [S2(0); S3(0); S4(0); S10(0.8); S12(98.5); T13(0.8); S17(0)]	Q80TH2 1xPhospho [S849(98.5)]	Q80TH2 1xPhospho [S839(0); S840(0); S841(0); S847(0.8); S849(98.5); T850(0.8); S854(0)]	2.37e-05	0	1.864	1	1	8	Q80TH2	Q80TH2	Erbin OS=Mus musculus OX=10090 GN=Erbin PE=1 SV=3	Erbin	Erbin_S849	YES	Q80TH2	Q80TH2 [838-857]	1	2573.29	20	0	0.929	1.04	1.249	-0.11	0.06	0.32	0.609408	0.748757	0.438969	0.98968	0.99264	0.968064	11.08	3.16	19.19	9.60934	9.15902	9.84837	0.815	1.103	0.883	0.976
2392	High	Unambiguous	AFGESSTESDEDEEEGCSHK	[R].AFGESSTESDEDEEEGCSHK.[H]	1xCarbamidomethyl [C17]; 1xTMT6plex [K20]; 1xTMT6plex [N-Term]; 1xPhospho [T/S]	1xCarbamidomethyl [C17]; 1xTMT6plex [K20]; 1xTMT6plex [N-Term]; 1xPhospho [S5(0.1); S6(2.2); T7(48.8); S9(48.8); S18(0)]	Q8K1L5 1xPhospho [T/S]	Q8K1L5 1xPhospho [S78(0.1); S79(2.2); T80(48.8); S82(48.8); S91(0)]	1.28e-08	0	3.354	1	1	49	Q8K1L5	Q8K1L5	E3 ubiquitin-protein ligase PPP1R11 OS=Mus musculus OX=10090 GN=Ppp1r11 PE=1 SV=1	Ppp1r11	Ppp1r11_[T80/S82]	YES	Q8K1L5	Q8K1L5 [74-93]	0	2768.13	20	0	0.913	0.808	1.033	-0.13	-0.31	0.05	0.482562	0.0673578	0.99336	0.976379	0.534051	0.999899	7.17	9.01	31.47	11.1583	10.4047	11.0684	0.966	0.913	0.961	0.844	0.819
4612	High	Unambiguous	TGTGSPFAGNSPAREGEQDAGSLKDVFK	[K].TGTGSPFAGNSPAREGEQDAGSLKDVFK.[G]	2xTMT6plex [K24; K28]; 1xTMT6plex [N-Term]; 2xPhospho [S5(95.2); S11(95.2)]	2xTMT6plex [K24; K28]; 1xTMT6plex [N-Term]; 2xPhospho [T1(2.1); T3(7.4); S5(95.2); S11(95.2); S22(0)]	Q6ZPZ3 2xPhospho [S1270(95.2); S1276(95.2)]	Q6ZPZ3 2xPhospho [T1266(2.1); T1268(7.4); S1270(95.2); S1276(95.2); S1287(0)]	0.00719481	0.000907142	0.707	1	1	5	Q6ZPZ3	Q6ZPZ3	Zinc finger CCCH domain-containing protein 4 OS=Mus musculus OX=10090 GN=Zc3h4 PE=1 SV=2	Zc3h4	Zc3h4_S1270;S1276	YES	Q6ZPZ3	Q6ZPZ3 [1266-1293]	2	3670.78	28	0	0.991	2.639	1.227	-0.01	1.4	0.29	0.994976	6.29e-12	0.526089	0.99999	1.23e-09	0.995553	25.81	97.1	39.14	9.39425	7.44128	9.38392		1.212	0.815	0.991
3802	High	Unambiguous	SSSLGDLLR	[R].SSSLGDLLR.[E]	1xTMT6plex [N-Term]; 1xPhospho [S3(95.1)]	1xTMT6plex [N-Term]; 1xPhospho [S1(0.3); S2(4.6); S3(95.1)]	Q8K124 1xPhospho [S395(95.1)]	Q8K124 1xPhospho [S393(0.3); S394(4.6); S395(95.1)]	0.00312839	0.000530845	0.876	1	1	14	Q8K124	Q8K124	Pleckstrin homology domain-containing family O member 2 OS=Mus musculus OX=10090 GN=Plekho2 PE=1 SV=1	Plekho2	Plekho2_S395	YES	Q8K124	Q8K124 [393-401]	0	1256.64	9	0	0.843	0.907	0.501	-0.25	-0.14	-1	0.235076	0.479385	0.00168018	0.81305	0.965376	0.0227648	6.55	18.39	10.15	9.48321	8.84329	10.0794	0.802	0.843	0.626	0.895	0.963
409	High	Unambiguous	QKSDAEEDGVTGSQDEEDSKPK	[K].QKSDAEEDGVTGSQDEEDSKPK.[A]	3xTMT6plex [K2; K20; K22]; 1xTMT6plex [N-Term]; 2xPhospho [S3(100); S13(100)]	3xTMT6plex [K2; K20; K22]; 1xTMT6plex [N-Term]; 2xPhospho [S3(100); T11(0); S13(100); S19(0)]	P35564 2xPhospho [S553(100); S563(100)]	P35564 2xPhospho [S553(100); T561(0); S563(100); S569(0)]	0.000300408	0	1.359	1	1	11	P35564	P35564	Calnexin OS=Mus musculus OX=10090 GN=Canx PE=1 SV=1	Canx	Canx_S553;[T561/S563]	YES	P35564	P35564 [551-572]	1	3455.63	22	0	0.993	0.987	0.978	-0.01	-0.02	-0.03	0.996439	0.986838	0.815359	0.99999	0.999874	0.998116	4.87	24.52	44.41	8.83415	8.43296	9.4582	0.984	0.96	1.082	1.35	0.993
573	High	Unambiguous	GVQAGNSDTEGGQPGRK	[K].GVQAGNSDTEGGQPGRK.[R]	1xTMT6plex [K17]; 1xTMT6plex [N-Term]; 1xPhospho [S7(99.9)]	1xTMT6plex [K17]; 1xTMT6plex [N-Term]; 1xPhospho [S7(99.9); T9(0.1)]	Q9JIX8 1xPhospho [S838(99.9)]	Q9JIX8 1xPhospho [S838(99.9); T840(0.1)]	0.000545972	0	1.238	1	1	6	Q9JIX8	Q9JIX8	Apoptotic chromatin condensation inducer in the nucleus OS=Mus musculus OX=10090 GN=Acin1 PE=1 SV=3	Acin1	Acin1_S838	YES	Q9JIX8	Q9JIX8 [832-848]	1	2196.08	17	0	0.895	1.066	1.17	-0.16	0.09	0.23	0.439991	0.672589	0.669541	0.968069	0.99264	0.998116	28.17	20.54	41.83	8.6575	8.04658	8.97355	0.683	0.895	0.651	1.167	1.094
3343	High	Unambiguous	ATAPQTQHVSPMR	[R].ATAPQTQHVSPMR.[Q]	1xOxidation [M12]; 1xTMT6plex [N-Term]; 1xPhospho [S10(100)]	1xOxidation [M12]; 1xTMT6plex [N-Term]; 1xPhospho [T2(0); T6(0); S10(100)]	P57776 1xPhospho [S133(100)]	P57776 1xPhospho [T125(0); T129(0); S133(100)]	0.00161335	0.000404169	1.014	1	1	25	P57776	P57776	Elongation factor 1-delta OS=Mus musculus OX=10090 GN=Eef1d PE=1 SV=3	Eef1d	Eef1d_S133	YES	P57776	P57776 [124-136]	0	1748.84	13	0	0.856	1.005	1.175	-0.22	0.01	0.23	0.253796	0.941771	0.570333	0.833335	0.997187	0.996923	22.45	23.18	59.69	11.0197	10.4755	10.9761	0.443	0.68	0.856	0.96	1.109
4564	High	Unambiguous	TKSPAEEELTPSAVVR	[R].TKSPAEEELTPSAVVR.[R]	1xTMT6plex [K2]; 1xTMT6plex [N-Term]; 1xPhospho [S3(99.2)]	1xTMT6plex [K2]; 1xTMT6plex [N-Term]; 1xPhospho [T1(0.8); S3(99.2); T10(0); S12(0)]	Q7TQG1 1xPhospho [S901(99.2)]	Q7TQG1 1xPhospho [T899(0.8); S901(99.2); T908(0); S910(0)]	0.0068739	0.000907142	0.716	1	1	3	Q7TQG1	Q7TQG1	Pleckstrin homology domain-containing family A member 6 OS=Mus musculus OX=10090 GN=Plekha6 PE=1 SV=1	Plekha6	Plekha6_S901	YES	Q7TQG1	Q7TQG1 [899-914]	1	2252.19	16	0	0.945	1.017	0.481	-0.08	0.02	-1.06	0.694815	0.818889	0.00853608	0.98968	0.994856	0.0829703	4.08	19.29	11.74	8.31152	7.63154	8.99718	0.945		0.909		0.974
4505	High	Unambiguous	AKGPSPPGAK	[R].AKGPSPPGAK.[R]	2xTMT6plex [K2; K10]; 1xTMT6plex [N-Term]; 1xPhospho [S5(100)]	2xTMT6plex [K2; K10]; 1xTMT6plex [N-Term]; 1xPhospho [S5(100)]	Q91XU0 1xPhospho [S65(100)]	Q91XU0 1xPhospho [S65(100)]	0.00621507	0.000907142	0.736	1	1	4	Q91XU0	Q91XU0	ATPase WRNIP1 OS=Mus musculus OX=10090 GN=Wrnip1 PE=1 SV=2	Wrnip1	Wrnip1_S65	YES	Q91XU0	Q91XU0 [61-70]	1	1676.97	10	0	0.516	0.673	0.726	-0.95	-0.57	-0.46	1.89e-06	0.00397466	0.205083	9.04e-05	0.0873161	0.73663	5.23	18.91	6.23	9.45573	9.15182	9.15393	0.393	0.613		0.48	0.555
1640	High	Unambiguous	RHSGQDVHVVLK	[R].RHSGQDVHVVLK.[L]	1xTMT6plex [K12]; 1xTMT6plex [N-Term]; 1xPhospho [S3(100)]	1xTMT6plex [K12]; 1xTMT6plex [N-Term]; 1xPhospho [S3(100)]	Q9CZ44 1xPhospho [S176(100)]	Q9CZ44 1xPhospho [S176(100)]	0.000173451	0	1.469	1	1	9	Q9CZ44	Q9CZ44	NSFL1 cofactor p47 OS=Mus musculus OX=10090 GN=Nsfl1c PE=1 SV=1	Nsfl1c	Nsfl1c_S176	YES	Q9CZ44	Q9CZ44 [174-185]	1	1913.05	12	0	0.761	0.739	0.64	-0.39	-0.44	-0.64	0.0698001	0.0256121	0.0382427	0.446456	0.304858	0.264257	4.72	4.41	11.29	9.75188	9.38414	10.159	0.761	0.719	0.814	0.717	0.79
4296	High	Unambiguous	SSSKSEGSPSPR	[R].SSSKSEGSPSPR.[Q]	1xTMT6plex [K4]; 1xTMT6plex [N-Term]; 1xPhospho [S3(90.1)]	1xTMT6plex [K4]; 1xTMT6plex [N-Term]; 1xPhospho [S1(0.8); S2(8.2); S3(90.1); S5(0.8); S8(0); S10(0)]	P97820 1xPhospho [S701(90.1)]	P97820 1xPhospho [S699(0.8); S700(8.2); S701(90.1); S703(0.8); S706(0); S708(0)]	0.00509298	0.000818925	0.776	1	1	12	P97820	P97820	Mitogen-activated protein kinase kinase kinase kinase 4 OS=Mus musculus OX=10090 GN=Map4k4 PE=1 SV=1	Map4k4	Map4k4_S701	YES	P97820	P97820 [699-710]	1	1743.87	12	0	0.736	1.061	0.666	-0.44	0.09	-0.59	0.0372721	0.63321	0.0590443	0.301089	0.99264	0.357891	2.9	25.56	19.23	9.21287	8.59542	9.60867	0.698		0.722	0.751	0.808
3261	High	Unambiguous	YFQISQDEDGSESED	[R].YFQISQDEDGSESED.[-]	1xTMT6plex [N-Term]; 1xPhospho [S11(100)]	1xTMT6plex [N-Term]; 1xPhospho [Y1(0); S5(0); S11(100); S13(0)]	Q9D7S7 1xPhospho [S118(100)]	Q9D7S7 1xPhospho [Y108(0); S112(0); S118(100); S120(0)]	0.000779295	0.000209709	1.165	1	1	5	Q9D7S7	Q9D7S7	60S ribosomal protein L22-like 1 OS=Mus musculus OX=10090 GN=Rpl22l1 PE=1 SV=1	Rpl22l1	Rpl22l1_S118	NO	Q9D7S7	Q9D7S7 [108-122]	0	2057.81	15	0	0.866	1.161	0.943	-0.21	0.22	-0.08	0.513042	0.35685	0.832689	0.980365	0.922977	0.998116	9.75	10.86	7.31	6.22601	6.23663	6.14662	0.808		0.683	0.928	0.956
3078	High	Unambiguous	SQPGPKPAASPRPSR	[M].SQPGPKPAASPRPSR.[G]	1xAcetyl [N-Term]; 1xTMT6plex [K6]; 1xTMT6plex [N-Term]; 1xPhospho [S10(89.9)]	1xAcetyl [N-Term]; 1xTMT6plex [K6]; 1xTMT6plex [N-Term]; 1xPhospho [S1(0); S10(89.9); S14(10.1)]	P51125 1xAcetyl [N-Term]; 1xPhospho [S11(89.9)]	P51125 1xAcetyl [N-Term]; 1xPhospho [S2(0); S11(89.9); S15(10.1)]	0.000992581	0.000209709	1.115	1	1	8	P51125	P51125	Calpastatin OS=Mus musculus OX=10090 GN=Cast PE=1 SV=2	Cast	Cast_S15	YES	P51125	P51125 [2-16]	0	2113.13	15	0	0.838	0.955	0.867	-0.25	-0.07	-0.21	0.222614	0.753291	0.44508	0.801179	0.99264	0.970969	14.74	10.93	59.3	9.55574	9.09882	9.57478	0.35	0.939	0.714	0.957	0.838
481	High	Unambiguous	HTGPNSPDTANDGFVR	[K].HTGPNSPDTANDGFVR.[L]	1xTMT6plex [N-Term]; 1xPhospho [S6(100)]	1xTMT6plex [N-Term]; 1xPhospho [T2(0); S6(100); T9(0)]	O35737 1xPhospho [S104(100)]	O35737 1xPhospho [T100(0); S104(100); T107(0)]	5.84e-06	0	2.142	1	2	3	O35737	O35737	Heterogeneous nuclear ribonucleoprotein H OS=Mus musculus OX=10090 GN=Hnrnph1 PE=1 SV=3	Hnrnph1	Hnrnph1_S104	YES	P70333; O35737	O35737 [99-114]	0	1993.9	16	0	0.812	1.042	0.763	-0.3	0.06	-0.39	0.24219	0.697706	0.292852	0.821301	0.99264	0.862778	8.08	24.97	36.42	7.79246	7.58045	8.04385	0.884	0.745			0.812
456	High	Unambiguous	KEESEESEDDMGFGLFD	[K].KEESEESEDDMGFGLFD.[-]	1xOxidation [M11]; 1xTMT6plex [K1]; 1xTMT6plex [N-Term]; 2xPhospho [S4(100); S7(100)]	1xOxidation [M11]; 1xTMT6plex [K1]; 1xTMT6plex [N-Term]; 2xPhospho [S4(100); S7(100)]	P47955 2xPhospho [S101(100); S104(100)]	P47955 2xPhospho [S101(100); S104(100)]	8.2e-05	0	1.618	1	1	16	P47955	P47955	60S acidic ribosomal protein P1 OS=Mus musculus OX=10090 GN=Rplp1 PE=1 SV=1	Rplp1	Rplp1_S101;S104	YES	P47955	P47955 [98-114]	1	2598.03	17	0	0.886	0.852	1.122	-0.17	-0.23	0.17	0.428093	0.21062	0.825725	0.960135	0.818449	0.998116	18.31	2.73	19.8	8.71216	8.82543	8.75925	0.681		0.818	0.96	1.099
1071	High	Unambiguous	SVDLDAFVAR	[K].SVDLDAFVAR.[N]	1xTMT6plex [N-Term]; 1xPhospho [S1(100)]	1xTMT6plex [N-Term]; 1xPhospho [S1(100)]	Q9JLQ0 1xPhospho [S458(100)]	Q9JLQ0 1xPhospho [S458(100)]	0.000345203	0	1.331	1	1	3	Q9JLQ0	Q9JLQ0	CD2-associated protein OS=Mus musculus OX=10090 GN=Cd2ap PE=1 SV=3	Cd2ap	Cd2ap_S458	YES	Q9JLQ0	Q9JLQ0 [458-467]	0	1401.7	10	0	0.706	1.58	1.517	-0.5	0.66	0.6	0.0370519	0.000784079	0.161079	0.300567	0.0275916	0.650217	9.99	14.32	34.9	8.10014	7.21043	8.20653		0.61	0.706	0.818
4934	High	Unambiguous	QEQLSPK	[R].QEQLSPK.[K]	1xTMT6plex [K7]; 1xTMT6plex [N-Term]; 1xPhospho [S5(100)]	1xTMT6plex [K7]; 1xTMT6plex [N-Term]; 1xPhospho [S5(100)]	O09000 1xPhospho [S720(100)]	O09000 1xPhospho [S720(100)]	0.0109897	0.00131309	0.625	1	1	7	O09000	O09000	Nuclear receptor coactivator 3 OS=Mus musculus OX=10090 GN=Ncoa3 PE=1 SV=2	Ncoa3	Ncoa3_S720	YES	O09000	O09000 [716-722]	0	1367.73	7	0	0.938	0.932	1.14	-0.09	-0.1	0.19	0.610301	0.560725	0.66152	0.98968	0.982767	0.998116	15.09	7.31	18.25	10.4128	10.1697	10.5964	1.019	1.047	0.669	0.808	0.938
3973	High	Unambiguous	LVEPHSPSPSSK	[R].LVEPHSPSPSSK.[F]	1xTMT6plex [K12]; 1xTMT6plex [N-Term]; 2xPhospho [S6(100); S8(99.7)]	1xTMT6plex [K12]; 1xTMT6plex [N-Term]; 2xPhospho [S6(100); S8(99.7); S10(0.3); S11(0)]	Q8BZ47 2xPhospho [S575(100); S577(99.7)]	Q8BZ47 2xPhospho [S575(100); S577(99.7); S579(0.3); S580(0)]	0.00331489	0.000530845	0.864	1	1	5	Q8BZ47	Q8BZ47	Zinc finger protein 609 OS=Mus musculus OX=10090 GN=Znf609 PE=1 SV=2	Znf609	Znf609_S575;S577	YES	Q8BZ47	Q8BZ47 [570-581]	0	1882.91	12	0	0.813	0.852	1.827	-0.3	-0.23	0.87	0.145102	0.235093	0.0497866	0.670467	0.845167	0.321246	7.51	11.22	56.23	9.26608	8.60955	8.76918	0.751		0.813	0.983
2454	High	Unambiguous	AEEDEILNRSPR	[K].AEEDEILNRSPR.[N]	1xTMT6plex [N-Term]; 1xPhospho [S10(100)]	1xTMT6plex [N-Term]; 1xPhospho [S10(100)]	P35564 1xPhospho [S582(100)]	P35564 1xPhospho [S582(100)]	4.09e-05	0	1.756	1	1	21	P35564	P35564	Calnexin OS=Mus musculus OX=10090 GN=Canx PE=1 SV=1	Canx	Canx_S582	YES	P35564	P35564 [573-584]	1	1737.84	12	0	0.991	1.28	0.879	-0.01	0.36	-0.19	0.892886	0.0297269	0.487816	0.999182	0.336242	0.984677	2.07	32.75	9.44	10.838	10.3499	11.3338	0.991	1.043	0.977	0.98	1.023
813	High	Unambiguous	KSSQDSDTPAQASPPEEK	[R].KSSQDSDTPAQASPPEEK.[I]	2xTMT6plex [K1; K18]; 1xTMT6plex [N-Term]; 2xPhospho [S6(100); S/T]	2xTMT6plex [K1; K18]; 1xTMT6plex [N-Term]; 2xPhospho [S2(50); S3(50); S6(100); T8(0); S13(0)]	A2AB59 2xPhospho [S462(100); S/T]	A2AB59 2xPhospho [S458(50); S459(50); S462(100); T464(0); S469(0)]	3.3e-06	0	2.255	1	1	11	A2AB59	A2AB59	Rho GTPase-activating protein 27 OS=Mus musculus OX=10090 GN=Arhgap27 PE=1 SV=1	Arhgap27	Arhgap27_S462;[S458/S459]	YES	A2AB59	A2AB59 [457-474]	1	2749.29	18	0	0.893	1.129	0.621	-0.16	0.18	-0.69	0.526489	0.350441	0.0631218	0.983958	0.922977	0.371804	17.05	23.09	17.02	8.00222	7.50949	8.407	0.575	0.81	0.985		1.059
4828	High	Unambiguous	KFELLPTPPLSPSR	[K].KFELLPTPPLSPSR.[RA]	1xTMT6plex [K1]; 1xTMT6plex [N-Term]; 2xPhospho [T7(100); S]	1xTMT6plex [K1]; 1xTMT6plex [N-Term]; 2xPhospho [T7(100); S11(50); S13(50)]	P01108 2xPhospho [T58(100); S]	P01108 2xPhospho [T58(100); S62(50); S64(50)]	0.010055	0.00104172	0.642	1	2	6	P01108	P01108	Myc proto-oncogene protein OS=Mus musculus OX=10090 GN=Myc PE=1 SV=1	Myc	Myc_T58;[S62/S64]	YES	P01108; P03966	P01108 [52-65]	1	2200.16	14	0	1.152	1.057	3.532	0.2	0.08	1.82	0.315733	0.641332	4.37e-06	0.890526	0.99264	0.000120654	34.28	7.31	159.18	7.98955	7.62092	7.62365	1.62	1.091	0.609		1.217
1380	High	Unambiguous	VIAISGDADSPAKR	[R].VIAISGDADSPAKR.[L]	1xTMT6plex [K13]; 1xTMT6plex [N-Term]; 1xPhospho [S10(100)]	1xTMT6plex [K13]; 1xTMT6plex [N-Term]; 1xPhospho [S5(0); S10(100)]	Q64701 1xPhospho [S1036(100)]	Q64701 1xPhospho [S1031(0); S1036(100)]	0.000509744	0	1.252	1	1	4	Q64701	Q64701	Retinoblastoma-like protein 1 OS=Mus musculus OX=10090 GN=Rbl1 PE=1 SV=3	Rbl1	Rbl1_S1036	YES	Q64701	Q64701 [1027-1040]	1	1938.05	14	0	0.933	1.223	1.973	-0.1	0.29	0.98	0.648983	0.179777	0.0224746	0.98968	0.78464	0.177762	10.3	25.71	63.74	8.9367	8.21251	8.49383	0.949	0.916	0.599		1.065
3830	High	Unambiguous	STGVSFWTQDSDENEQERQSDTEDGSSKR	[R].STGVSFWTQDSDENEQERQSDTEDGSSKR.[E]	1xTMT6plex [K28]; 1xTMT6plex [N-Term]; 1xPhospho [S20(99.9)]	1xTMT6plex [K28]; 1xTMT6plex [N-Term]; 1xPhospho [S1(0); T2(0); S5(0); T8(0); S11(0); S20(99.9); T22(0.1); S26(0); S27(0)]	Q9DBR7 1xPhospho [S870(99.9)]	Q9DBR7 1xPhospho [S851(0); T852(0); S855(0); T858(0); S861(0); S870(99.9); T872(0.1); S876(0); S877(0)]	0.00326721	0.000530845	0.867	1	1	5	Q9DBR7	Q9DBR7	Protein phosphatase 1 regulatory subunit 12A OS=Mus musculus OX=10090 GN=Ppp1r12a PE=1 SV=2	Ppp1r12a	Ppp1r12a_S870	YES	Q9DBR7	Q9DBR7 [851-879]	2	3843.7	29	0	0.821	1.045	1.104	-0.28	0.06	0.14	0.201979	0.706523	0.817568	0.77337	0.99264	0.998116	7.28	21.33	34.82	8.23279	7.39611	8.46187	0.63	0.903	0.859	0.785
3206	High	Unambiguous	ADSDSEDKGEESKPK	[K].ADSDSEDKGEESKPK.[K]	3xTMT6plex [K8; K13; K15]; 1xTMT6plex [N-Term]; 1xPhospho [S3(93.6)]	3xTMT6plex [K8; K13; K15]; 1xTMT6plex [N-Term]; 1xPhospho [S3(93.6); S5(6.4); S12(0)]	P83917 1xPhospho [S89(93.6)]	P83917 1xPhospho [S89(93.6); S91(6.4); S98(0)]	0.00122697	0.000209709	1.071	1	1	4	P83917	P83917	Chromobox protein homolog 1 OS=Mus musculus OX=10090 GN=Cbx1 PE=1 SV=1	Cbx1	Cbx1_S89	YES	P83917	P83917 [87-101]	1	2618.34	15	0	0.872	1.095	1.014	-0.2	0.13	0.02	0.31019	0.513441	0.918135	0.888553	0.970896	0.999462	8.77	7.92	9.07	10.113	8.886	9.70581	0.872			0.804	0.97
3580	High	Unambiguous	TNSPAYSDISDAGEDGEGKVDSAK	[K].TNSPAYSDISDAGEDGEGKVDSAK.[S]	2xTMT6plex [K19; K24]; 1xTMT6plex [N-Term]; 3xPhospho [S3(98.2); S7(98.5); S10(99.8)]	2xTMT6plex [K19; K24]; 1xTMT6plex [N-Term]; 3xPhospho [T1(1.6); S3(98.2); Y6(2); S7(98.5); S10(99.8); S22(0)]	Q8BZ47 3xPhospho [S841(98.2); S845(98.5); S848(99.8)]	Q8BZ47 3xPhospho [T839(1.6); S841(98.2); Y844(2); S845(98.5); S848(99.8); S860(0)]	0.00203083	0.000530845	0.966	1	1	5	Q8BZ47	Q8BZ47	Zinc finger protein 609 OS=Mus musculus OX=10090 GN=Znf609 PE=1 SV=2	Znf609	Znf609_S845;S848;S841	YES	Q8BZ47	Q8BZ47 [839-862]	1	3340.45	24	0	0.864	1.111	1.479	-0.21	0.15	0.56	0.384159	0.471118	0.161364	0.937398	0.965165	0.650679	3.99	29.03	39.99	7.35337	6.77788	7.06144	0.48	0.881	0.848		0.91
2485	High	Unambiguous	AAAAAAAAAAGDSDSWDADTFSMEDPVRK	[M].AAAAAAAAAAGDSDSWDADTFSMEDPVRK.[V]	1xAcetyl [N-Term]; 1xTMT6plex [K29]; 1xTMT6plex [N-Term]; 1xPhospho [S13(89.1)]	1xAcetyl [N-Term]; 1xTMT6plex [K29]; 1xTMT6plex [N-Term]; 1xPhospho [S13(89.1); S15(10.9); T20(0); S22(0)]	Q3UGC7 1xAcetyl [N-Term]; 1xPhospho [S14(89.1)]	Q3UGC7 1xAcetyl [N-Term]; 1xPhospho [S14(89.1); S16(10.9); T21(0); S23(0)]	5.93e-11	0	4.419	1	1	14	Q3UGC7	Q3UGC7	Eukaryotic translation initiation factor 3 subunit J-A OS=Mus musculus OX=10090 GN=Eif3j1 PE=2 SV=1	Eif3j1	Eif3j1_S14	YES	Q3UGC7	Q3UGC7 [2-30]	1	3448.58	29	0	0.939	1.122	1.462	-0.09	0.17	0.55	0.890473	0.640019	0.208685	0.999182	0.99264	0.743809	31.43	16.68	22.88	5.43588	4.58577	5.47079	0.503	0.924	1.486	0.954
828	High	Unambiguous	KSPVFSDEDSDLDFDIGKLEQQTK	[R].KSPVFSDEDSDLDFDIGKLEQQTK.[M]	3xTMT6plex [K1; K18; K24]; 1xTMT6plex [N-Term]; 2xPhospho [S2(100); S10(100)]	3xTMT6plex [K1; K18; K24]; 1xTMT6plex [N-Term]; 2xPhospho [S2(100); S6(0); S10(100); T23(0)]	Q810V0 2xPhospho [S164(100); S172(100)]	Q810V0 2xPhospho [S164(100); S168(0); S172(100); T185(0)]	0.000104447	0	1.57	1	1	6	Q810V0	Q810V0	U3 small nucleolar ribonucleoprotein protein MPP10 OS=Mus musculus OX=10090 GN=Mphosph10 PE=1 SV=2	Mphosph10	Mphosph10_S164;S168	YES	Q810V0	Q810V0 [163-186]	2	3817.9	24	0	1.18	1.229	3.939	0.24	0.3	1.98	0.28034	0.200548	1.58e-06	0.857836	0.803991	4.68e-05	33.93	24.91	17.05	8.29232	8.09961	8.08481	0.71	1.18	1.45
3072	High	Unambiguous	SASQDLIK	[R].SASQDLIK.[K]	1xTMT6plex [K8]; 1xTMT6plex [N-Term]; 1xPhospho [S1(100)]	1xTMT6plex [K8]; 1xTMT6plex [N-Term]; 1xPhospho [S1(100); S3(0)]	Q3UH68 1xPhospho [S377(100)]	Q3UH68 1xPhospho [S377(100); S379(0)]	0.00113057	0.000209709	1.088	1	1	4	Q3UH68	Q3UH68	LIM and calponin homology domains-containing protein 1 OS=Mus musculus OX=10090 GN=Limch1 PE=1 SV=2	Limch1	Limch1_S377	YES	Q3UH68	Q3UH68 [377-384]	0	1399.76	8	0	0.809	0.921	0.631	-0.31	-0.12	-0.66	0.134122	0.575877	0.0967949	0.648766	0.982767	0.489414	11.18	4.64	5.59	9.48844	8.48623	9.07708	0.902		0.598		0.809
382	High	Unambiguous	NTVDLVNTHHLHSSSDDEDDRLK	[K].NTVDLVNTHHLHSSSDDEDDRLK.[E]	1xTMT6plex [K23]; 1xTMT6plex [N-Term]; 1xPhospho [S15(82.4)]	1xTMT6plex [K23]; 1xTMT6plex [N-Term]; 1xPhospho [T2(0); T8(0.1); S13(8.7); S14(8.7); S15(82.4)]	Q7TSI3 1xPhospho [S531(82.4)]	Q7TSI3 1xPhospho [T518(0); T524(0.1); S529(8.7); S530(8.7); S531(82.4)]	0.000117251	0	1.547	1	1	7	Q7TSI3	Q7TSI3	Serine/threonine-protein phosphatase 6 regulatory subunit 1 OS=Mus musculus OX=10090 GN=Ppp6r1 PE=1 SV=1	Ppp6r1	Ppp6r1_S531	YES	Q7TSI3	Q7TSI3 [517-539]	1	3185.53	23	0	1.069	0.866	0.969	0.1	-0.21	-0.05	0.61308	0.371894	0.848958	0.98968	0.928331	0.998116	8.05	32.02	23.44	8.7396	8.00558	9.03401	1.088	1.051	0.884		1.166
4771	High	Unambiguous	VPTRHSPPESPQLLVSTEPNSDAVQR	[R].VPTRHSPPESPQLLVSTEPNSDAVQR.[L]	1xTMT6plex [N-Term]; 1xPhospho [T3(99.4)]	1xTMT6plex [N-Term]; 1xPhospho [T3(99.4); S6(0.5); S10(0.1); S16(0); T17(0); S21(0)]	Q8CFK6 1xPhospho [T696(99.4)]	Q8CFK6 1xPhospho [T696(99.4); S699(0.5); S703(0.1); S709(0); T710(0); S714(0)]	0.00712211	0.000907142	0.709	1	1	14	Q8CFK6	Q8CFK6	DENN domain-containing protein 1C OS=Mus musculus OX=10090 GN=Dennd1c PE=1 SV=1	Dennd1c	Dennd1c_T696	YES	Q8CFK6	Q8CFK6 [694-719]	1	3150.58	26	0	0.864	0.791	0.82	-0.21	-0.34	-0.29	0.399878	0.10703	0.438651	0.946862	0.65873	0.968064	6.95	7.7	39.39	8.00506	7.19081	8.05202	0.864	1.043	0.741	0.856	0.918
2873	High	Unambiguous	FTGYQTIQQQSSSETEGEGGNTADASSEEEGDRVEDGK	[K].FTGYQTIQQQSSSETEGEGGNTADASSEEEGDRVEDGK.[G]	1xTMT6plex [K38]; 1xTMT6plex [N-Term]; 2xPhospho [S26(99.5); S27(99.5)]	1xTMT6plex [K38]; 1xTMT6plex [N-Term]; 2xPhospho [T2(0); Y4(0); T6(0); S11(0); S12(0); S13(0); T15(0); T22(1); S26(99.5); S27(99.5)]	Q9JMG7 2xPhospho [S121(99.5); S122(99.5)]	Q9JMG7 2xPhospho [T97(0); Y99(0); T101(0); S106(0); S107(0); S108(0); T110(0); T117(1); S121(99.5); S122(99.5)]	5.33e-07	0	2.616	1	1	6	Q9JMG7	Q9JMG7	Hepatoma-derived growth factor-related protein 3 OS=Mus musculus OX=10090 GN=Hdgfl3 PE=1 SV=2	Hdgfl3	Hdgfl3_S121;S122	YES	Q9JMG7	Q9JMG7 [96-133]	1	4641.97	38	0	0.898	1.129	0.9	-0.15	0.17	-0.15	0.533606	0.400545	0.627932	0.986607	0.939674	0.997562	4.77	6.48	22.03	7.38543	6.51096	7.52513		0.898	0.934		0.788
2512	High	Unambiguous	ADMTASGSPDYGQPHK	[K].ADMTASGSPDYGQPHK.[I]	1xOxidation [M3]; 1xTMT6plex [K16]; 1xTMT6plex [N-Term]; 1xPhospho [T4(94.1)]	1xOxidation [M3]; 1xTMT6plex [K16]; 1xTMT6plex [N-Term]; 1xPhospho [T4(94.1); S6(5.5); S8(0.4); Y11(0)]	P26323 1xPhospho [T35(94.1)]	P26323 1xPhospho [T35(94.1); S37(5.5); S39(0.4); Y42(0)]	0.000654163	0	1.201	1	1	13	P26323	P26323	Friend leukemia integration 1 transcription factor OS=Mus musculus OX=10090 GN=Fli1 PE=1 SV=1	Fli1	Fli1_[T35/S39]	YES	P26323	P26323 [32-47]	0	2216.01	16	0	0.845	0.932	0.9	-0.24	-0.1	-0.15	0.234309	0.53574	0.555052	0.81305	0.974667	0.996923	1.51	14.91	20.25	9.87774	9.95434	10.3096	0.845	0.93	0.757	0.833	0.857
2393	High	Unambiguous	AFGESSTESDEDEEEGCSHK	[R].AFGESSTESDEDEEEGCSHK.[H]	1xCarbamidomethyl [C17]; 1xTMT6plex [K20]; 1xTMT6plex [N-Term]; 2xPhospho [T7(92.7); S9(99.4)]	1xCarbamidomethyl [C17]; 1xTMT6plex [K20]; 1xTMT6plex [N-Term]; 2xPhospho [S5(0.6); S6(7.3); T7(92.7); S9(99.4); S18(0)]	Q8K1L5 2xPhospho [T80(92.7); S82(99.4)]	Q8K1L5 2xPhospho [S78(0.6); S79(7.3); T80(92.7); S82(99.4); S91(0)]	0.000110943	0	1.558	1	1	20	Q8K1L5	Q8K1L5	E3 ubiquitin-protein ligase PPP1R11 OS=Mus musculus OX=10090 GN=Ppp1r11 PE=1 SV=1	Ppp1r11	Ppp1r11_S82;T80	YES	Q8K1L5	Q8K1L5 [74-93]	0	2848.09	20	0	0.898	0.853	1.053	-0.15	-0.23	0.07	0.474803	0.259445	0.984807	0.974021	0.859772	0.999899	3.03	6.26	31.64	9.49165	9.0983	9.67684	1.008	1.067	0.898	0.889	0.876
187	High	Unambiguous	LSPGAYPTVIQQQTAPSQR	[R].LSPGAYPTVIQQQTAPSQR.[A]	1xTMT6plex [N-Term]; 1xPhospho [S2(99.9)]	1xTMT6plex [N-Term]; 1xPhospho [S2(99.9); Y6(0.1); T8(0); T14(0); S17(0)]	Q60591 1xPhospho [S860(99.9)]	Q60591 1xPhospho [S860(99.9); Y864(0.1); T866(0); T872(0); S875(0)]	0.000114917	0	1.551	1	1	3	Q60591	Q60591	Nuclear factor of activated T-cells; cytoplasmic 2 OS=Mus musculus OX=10090 GN=Nfatc2 PE=1 SV=3	Nfatc2	Nfatc2_S860	YES	Q60591	Q60591 [859-877]	0	2351.2	19	0	0.734	0.74	0.47	-0.45	-0.43	-1.09	0.0633098	0.134173	0.00571081	0.422689	0.710136	0.0602887	5	0.22	4.41	6.60288	5.86047	7.04876	0.734	0.688	0.991
1384	High	Unambiguous	VKPAGSVNDVGLDALDLDR	[R].VKPAGSVNDVGLDALDLDR.[M]	1xTMT6plex [K2]; 1xTMT6plex [N-Term]; 1xPhospho [S6(100)]	1xTMT6plex [K2]; 1xTMT6plex [N-Term]; 1xPhospho [S6(100)]	P70429 1xPhospho [S367(100)]	P70429 1xPhospho [S367(100)]	3.15e-07	0	2.72	1	1	7	P70429	P70429	Ena/VASP-like protein OS=Mus musculus OX=10090 GN=Evl PE=1 SV=2	Evl	Evl_S367	YES	P70429	P70429 [362-380]	0	2492.32	19	0	1.095	1.205	0.721	0.13	0.27	-0.47	0.495313	0.249679	0.215884	0.979638	0.853748	0.7488	14.62	28.18	49.48	8.69732	8.08428	8.99774	0.762	1.019	1.203	1.095	1.224
698	High	Unambiguous	LGGSAESLIPGFQPTQGDAFTTPSFSAGTAEK	[K].LGGSAESLIPGFQPTQGDAFTTPSFSAGTAEK.[R]	1xTMT6plex [K32]; 1xTMT6plex [N-Term]; 1xPhospho [S4(97.5)]	1xTMT6plex [K32]; 1xTMT6plex [N-Term]; 1xPhospho [S4(97.5); S7(2.5); T15(0); T21(0); T22(0); S24(0); S26(0); T29(0)]	Q3UHJ0 1xPhospho [S729(97.5)]	Q3UHJ0 1xPhospho [S729(97.5); S732(2.5); T740(0); T746(0); T747(0); S749(0); S751(0); T754(0)]	0.000291578	0	1.365	1	1	7	Q3UHJ0	Q3UHJ0	AP2-associated protein kinase 1 OS=Mus musculus OX=10090 GN=Aak1 PE=1 SV=2	Aak1	Aak1_S729	YES	Q3UHJ0	Q3UHJ0 [726-757]	0	3707.82	32	0	1.02	1.13	0.661	0.03	0.18	-0.6	0.757015	0.435807	0.126776	0.997986	0.957894	0.572378	11.47	43.1	21.91	6.38391	6.20963	6.86523	0.968		1.123	1.075	0.669
2190	High	Unambiguous	ESSREALVEPASESPRPALAR	[K].ESSREALVEPASESPRPALAR.[S]	1xTMT6plex [N-Term]; 1xPhospho [S2(91.6)]	1xTMT6plex [N-Term]; 1xPhospho [S2(91.6); S3(8.4); S12(0); S14(0)]	P70441 1xPhospho [S263(91.6)]	P70441 1xPhospho [S263(91.6); S264(8.4); S273(0); S275(0)]	0.000670293	0	1.196	1	1	6	P70441	P70441	Na(+)/H(+) exchange regulatory cofactor NHE-RF1 OS=Mus musculus OX=10090 GN=Slc9a3r1 PE=1 SV=3	Slc9a3r1	Slc9a3r1_[S263/S264]	YES	P70441	P70441 [262-282]	1	2561.29	21	0	0.995	1.068	1.249	-0.01	0.09	0.32	0.985731	0.563625	0.516735	0.99999	0.982767	0.989345	14.18	18.09	9.48	9.02849	8.42349	9.30587	1.043	0.949	0.85		1.245
509	High	Unambiguous	KKSPNELVDDLFK	[R].KKSPNELVDDLFK.[G]	3xTMT6plex [K1; K2; K13]; 1xTMT6plex [N-Term]; 1xPhospho [S3(100)]	3xTMT6plex [K1; K2; K13]; 1xTMT6plex [N-Term]; 1xPhospho [S3(100)]	Q9CZ44 1xPhospho [S114(100)]	Q9CZ44 1xPhospho [S114(100)]	0.000527556	0	1.245	1	1	5	Q9CZ44	Q9CZ44	NSFL1 cofactor p47 OS=Mus musculus OX=10090 GN=Nsfl1c PE=1 SV=1	Nsfl1c	Nsfl1c_S114	YES	Q9CZ44	Q9CZ44 [112-124]	2	2529.45	13	0	0.888	0.802	0.898	-0.17	-0.32	-0.15	0.444971	0.176357	0.560177	0.968069	0.781459	0.996923	11.94	5.84	31.93	8.27938	7.824	8.75154	0.797	0.888		1.088
2356	High	Unambiguous	AGEQQLSEPEDMEMEAGDTDDPPR	[K].AGEQQLSEPEDMEMEAGDTDDPPR.[I]	2xOxidation [M12; M14]; 1xTMT6plex [N-Term]; 1xPhospho [S7(100)]	2xOxidation [M12; M14]; 1xTMT6plex [N-Term]; 1xPhospho [S7(100); T19(0)]	Q6A4J8 1xPhospho [S19(100)]	Q6A4J8 1xPhospho [S19(100); T31(0)]	1.38e-06	0	2.428	1	1	6	Q6A4J8	Q6A4J8	Ubiquitin carboxyl-terminal hydrolase 7 OS=Mus musculus OX=10090 GN=Usp7 PE=1 SV=1	Usp7	Usp7_S19	YES	Q6A4J8	Q6A4J8 [13-36]	0	2988.2	24	0	0.769	1.036	0.856	-0.38	0.05	-0.22	0.191205	0.776263	0.567491	0.756954	0.992828	0.996923	12.81	64.48	24.94	6.20164	5.83594	6.50891	0.843	0.618		1.033	0.701
2390	High	Unambiguous	AETSESSGSAPAVPEASASPK	[K].AETSESSGSAPAVPEASASPK.[Q]	1xTMT6plex [K21]; 1xTMT6plex [N-Term]; 1xPhospho [S19(100)]	1xTMT6plex [K21]; 1xTMT6plex [N-Term]; 1xPhospho [T3(0); S4(0); S6(0); S7(0); S9(0); S17(0); S19(100)]	Q9Z2D6 1xPhospho [S80(100)]	Q9Z2D6 1xPhospho [T64(0); S65(0); S67(0); S68(0); S70(0); S78(0); S80(100)]	1.13e-09	0	3.835	1	1	10	Q9Z2D6	Q9Z2D6	Methyl-CpG-binding protein 2 OS=Mus musculus OX=10090 GN=Mecp2 PE=1 SV=1	Mecp2	Mecp2_S80	YES	Q9Z2D6	Q9Z2D6 [62-82]	0	2498.21	21	0	0.936	1.194	0.823	-0.1	0.26	-0.28	0.802076	0.23924	0.416544	0.998955	0.849352	0.957923	0.88	19.88	20.47	7.15684	6.76686	7.32283	0.932	0.936	1.089	0.953	0.93
2377	High	Unambiguous	AHTDEPHSPQSK	[R].AHTDEPHSPQSK.[K]	1xTMT6plex [K12]; 1xTMT6plex [N-Term]; 1xPhospho [S8(100)]	1xTMT6plex [K12]; 1xTMT6plex [N-Term]; 1xPhospho [T3(0); S8(100); S11(0)]	Q80Y81 1xPhospho [S815(100)]	Q80Y81 1xPhospho [T810(0); S815(100); S818(0)]	6.25e-05	0	1.672	1	1	6	Q80Y81	Q80Y81	Zinc phosphodiesterase ELAC protein 2 OS=Mus musculus OX=10090 GN=Elac2 PE=1 SV=1	Elac2	Elac2_S815	YES	Q80Y81	Q80Y81 [808-819]	0	1871.91	12	0	0.852	0.957	0.897	-0.23	-0.06	-0.16	0.292913	0.735671	0.632458	0.87243	0.99264	0.997562	5.61	3.47	37.12	9.16415	8.70805	9.09011	0.903	1.099	0.83	0.852	0.807
1871	High	Unambiguous	SLFFGSILAPVHSPQGPNPVLAEDSDGEG	[R].SLFFGSILAPVHSPQGPNPVLAEDSDGEG.[-]	1xTMT6plex [N-Term]; 1xPhospho [S25(100)]	1xTMT6plex [N-Term]; 1xPhospho [S1(0); S6(0); S13(0); S25(100)]	Q9Z0F6 1xPhospho [S385(100)]	Q9Z0F6 1xPhospho [S361(0); S366(0); S373(0); S385(100)]	3.28e-05	0	1.8	1	1	5	Q9Z0F6	Q9Z0F6	Cell cycle checkpoint control protein RAD9A OS=Mus musculus OX=10090 GN=Rad9a PE=1 SV=1	Rad9a	Rad9a_S385	YES	Q9Z0F6	Q9Z0F6 [361-389]	0	3246.56	29	0	0.855	0.892	0.623	-0.23	-0.17	-0.68	0.562613	0.589091	0.0803833	0.98968	0.983498	0.432715	25.66	4.01	19.42	5.11891	4.69256	5.76851	0.689	1.063	1.304	0.658
87	High	Unambiguous	NFSDNQLQEGK	[R].NFSDNQLQEGK.[N]	1xTMT6plex [K11]; 1xTMT6plex [N-Term]; 1xPhospho [S3(100)]	1xTMT6plex [K11]; 1xTMT6plex [N-Term]; 1xPhospho [S3(100)]	Q9WVA4 1xPhospho [S163(100)]	Q9WVA4 1xPhospho [S163(100)]	6.69e-06	0	2.115	1	1	8	Q9WVA4	Q9WVA4	Transgelin-2 OS=Mus musculus OX=10090 GN=Tagln2 PE=1 SV=4	Tagln2	Tagln2_S163	YES	Q9WVA4	Q9WVA4 [161-171]	0	1817.88	11	0	2.404	2.488	2.741	1.27	1.32	1.45	1.97e-10	3.26e-11	6.29e-05	1.85e-08	5.16e-09	0.00131745	49.98	72.91	16.37	9.55094	9.14924	9.70408	1.594	3.218	1.518	2.404	2.921
5936	High	Unambiguous	SESPKEPEQLR	[K].SESPKEPEQLR.[K]	1xTMT6plex [K5]; 1xTMT6plex [N-Term]; 1xPhospho [S3(100)]	1xTMT6plex [K5]; 1xTMT6plex [N-Term]; 1xPhospho [S1(0); S3(100)]	P49312 1xPhospho [S6(100)]	P49312 1xPhospho [S4(0); S6(100)]	0.0463205	0.00494639	0.359	1	1	6	P49312	P49312	Heterogeneous nuclear ribonucleoprotein A1 OS=Mus musculus OX=10090 GN=Hnrnpa1 PE=1 SV=2	Hnrnpa1	Hnrnpa1_S6	YES	P49312	P49312 [4-14]	1	1837.95	11	0	0.897	0.991	0.648	-0.16	-0.01	-0.63	0.411494	0.984438	0.0430673	0.954943	0.999874	0.289951	10.42	8.94	24.42	9.97895	9.73639	10.4116	0.952		0.999	0.758	0.846
3865	High	Unambiguous	SSNRDDNLPLTEAVRPKTPPVVIK	[K].SSNRDDNLPLTEAVRPKTPPVVIK.[S]	2xTMT6plex [K17; K24]; 1xTMT6plex [N-Term]; 1xPhospho [T18(99.7)]	2xTMT6plex [K17; K24]; 1xTMT6plex [N-Term]; 1xPhospho [S1(0); S2(0); T11(0.3); T18(99.7)]	Q9D5V6 1xPhospho [T262(99.7)]	Q9D5V6 1xPhospho [S245(0); S246(0); T255(0.3); T262(99.7)]	0.00282759	0.000530845	0.897	1	1	8	Q9D5V6	Q9D5V6	Synapse-associated protein 1 OS=Mus musculus OX=10090 GN=Syap1 PE=1 SV=1	Syap1	Syap1_T262	YES	Q9D5V6	Q9D5V6 [245-268]	2	3413.91	24	0	0.977	1.239	0.704	-0.03	0.31	-0.51	0.869559	0.159678	0.128635	0.999182	0.754571	0.575151	26.63	6.96	10.26	8.52395	7.8759	9.24198	0.698	1.361	0.826	0.977	1.161
3422	High	Unambiguous	KVSADGAAK	[R].KVSADGAAK.[A]	2xTMT6plex [K1; K9]; 1xTMT6plex [N-Term]; 1xPhospho [S3(100)]	2xTMT6plex [K1; K9]; 1xTMT6plex [N-Term]; 1xPhospho [S3(100)]	P18608 1xPhospho [S7(100)]	P18608 1xPhospho [S7(100)]	0.00142409	0.000404169	1.04	1	1	15	P18608	P18608	Non-histone chromosomal protein HMG-14 OS=Mus musculus OX=10090 GN=Hmgn1 PE=1 SV=2	Hmgn1	Hmgn1_S7	YES	P18608	P18608 [5-13]	1	1613.92	9	0	1.033	0.91	1.249	0.05	-0.14	0.32	0.87717	0.428297	0.403804	0.999182	0.953598	0.949326	18.16	0.91	53.1	11.7117	11.7148	12.0788	1.033	1.228	0.794	1.022	1.16
136	High	Unambiguous	LPSIVVEPTEGEVESGELR	[R].LPSIVVEPTEGEVESGELR.[W]	1xTMT6plex [N-Term]; 1xPhospho [S3(100)]	1xTMT6plex [N-Term]; 1xPhospho [S3(100); T9(0); S15(0)]	Q9CX60 1xPhospho [S63(100)]	Q9CX60 1xPhospho [S63(100); T69(0); S75(0)]	3.52e-06	0	2.242	1	1	4	Q9CX60	Q9CX60	Protein LBH OS=Mus musculus OX=10090 GN=Lbh PE=1 SV=1	Lbh	Lbh_S63	YES	Q9CX60	Q9CX60 [61-79]	0	2349.18	19	0	0.956	1.145	1.043	-0.07	0.2	0.06	0.937933	0.55549	0.873565	0.99999	0.981654	0.998362	33.27	22.53	73.29	5.70667	4.31758	5.60022	0.839	1.089	0.473		1.292
1251	High	Unambiguous	VMHTQCHSTPDSAEDVRK	[R].VMHTQCHSTPDSAEDVRK.[L]	1xCarbamidomethyl [C6]; 1xTMT6plex [K18]; 1xTMT6plex [N-Term]; 1xPhospho [S12(100)]	1xCarbamidomethyl [C6]; 1xTMT6plex [K18]; 1xTMT6plex [N-Term]; 1xPhospho [T4(0); S8(0); T9(0); S12(100)]	P29699 1xPhospho [S138(100)]	P29699 1xPhospho [T130(0); S134(0); T135(0); S138(100)]	6.79e-06	0	2.112	1	1	20	P29699	P29699	Alpha-2-HS-glycoprotein OS=Mus musculus OX=10090 GN=Ahsg PE=1 SV=1	Ahsg	Ahsg_S138	YES	P29699	P29699 [127-144]	1	2636.24	18	0	0.753	1.21	0.85	-0.41	0.28	-0.23	0.0424647	0.0917506	0.399913	0.326034	0.613905	0.947914	5.7	26.57	28.28	10.7766	10.5261	10.7266	0.468	0.753	0.702	0.779	0.97
2792	High	Unambiguous	GLFSDEEDSEDLFSSQSSSKPK	[K].GLFSDEEDSEDLFSSQSSSKPK.[S]	2xTMT6plex [K20; K22]; 1xTMT6plex [N-Term]; 1xPhospho [S4(100)]	2xTMT6plex [K20; K22]; 1xTMT6plex [N-Term]; 1xPhospho [S4(100); S9(0); S14(0); S15(0); S17(0); S18(0); S19(0)]	Q6PGL7 1xPhospho [S533(100)]	Q6PGL7 1xPhospho [S533(100); S538(0); S543(0); S544(0); S546(0); S547(0); S548(0)]	6.53e-08	0	3.032	1	1	8	Q6PGL7	Q6PGL7	WASH complex subunit 2 OS=Mus musculus OX=10090 GN=Washc2 PE=1 SV=1	Washc2	Washc2_S533	YES	Q6PGL7	Q6PGL7 [530-551]	0	3186.53	22	0	0.935	0.954	1.125	-0.1	-0.07	0.17	0.657264	0.790415	0.750866	0.98968	0.994856	0.998116	3.42	6.14	30.54	8.92985	8.45574	9.43233	0.994	1.039	0.915	0.935	0.91
3547	High	Unambiguous	RSDSQQAVK	[R].RSDSQQAVK.[S]	1xTMT6plex [K9]; 1xTMT6plex [N-Term]; 1xPhospho [S4(100)]	1xTMT6plex [K9]; 1xTMT6plex [N-Term]; 1xPhospho [S2(0); S4(100)]	Q8BVL3 1xPhospho [S409(100)]	Q8BVL3 1xPhospho [S407(0); S409(100)]	0.00258096	0.000530845	0.916	1	1	4	Q8BVL3	Q8BVL3	Sorting nexin-17 OS=Mus musculus OX=10090 GN=Snx17 PE=1 SV=2	Snx17	Snx17_S409	YES	Q8BVL3	Q8BVL3 [406-414]	1	1556.82	9	0	1.124	1.074	0.853	0.17	0.1	-0.23	0.435663	0.628387	0.459021	0.963955	0.99264	0.978067	8.99	6.54	40.19	8.29354	7.91345	8.83198	1.128		0.992	1.329	1.12
5010	High	Unambiguous	DYDDMSPR	[R].DYDDMSPR.[R]	1xOxidation [M5]; 1xTMT6plex [N-Term]; 1xPhospho [S6(100)]	1xOxidation [M5]; 1xTMT6plex [N-Term]; 1xPhospho [Y2(0); S6(100)]	P61979 1xPhospho [S284(100)]	P61979 1xPhospho [Y280(0); S284(100)]	0.0118913	0.00144147	0.61	1	1	6	P61979	P61979	Heterogeneous nuclear ribonucleoprotein K OS=Mus musculus OX=10090 GN=Hnrnpk PE=1 SV=1	Hnrnpk	Hnrnpk_S284	NO	P61979	P61979 [279-286]	0	1323.51	8	0	0.804	1.145	1.014	-0.31	0.2	0.02	0.134223	0.314792	0.941751	0.648766	0.901121	0.999899	4.14	36.61	34.33	9.87206	9.33047	10.3641	0.77	0.804	1.002
3064	High	Unambiguous	CNSDESNLSEK	[R].CNSDESNLSEK.[Q]	1xCarbamidomethyl [C1]; 1xTMT6plex [K11]; 1xTMT6plex [N-Term]; 1xPhospho [S6(94.1)]	1xCarbamidomethyl [C1]; 1xTMT6plex [K11]; 1xTMT6plex [N-Term]; 1xPhospho [S3(5.9); S6(94.1); S9(0)]	Q9Z0H7 1xPhospho [S141(94.1)]	Q9Z0H7 1xPhospho [S138(5.9); S141(94.1); S144(0)]	0.00102174	0.000209709	1.109	1	1	5	Q9Z0H7	Q9Z0H7	B-cell lymphoma/leukemia 10 OS=Mus musculus OX=10090 GN=Bcl10 PE=1 SV=1	Bcl10	Bcl10_S141	YES	Q9Z0H7	Q9Z0H7 [136-146]	0	1820.81	11	0	1.22	1.685	0.999	0.29	0.75	0	0.17334	9.72e-05	0.852105	0.728333	0.00502347	0.998116	21.25	8.44	33.46	9.07012	8.75689	9.26256	1.22		1.045		1.74
1427	High	Unambiguous	VESTSVGSISPGGAK	[R].VESTSVGSISPGGAK.[L]	1xTMT6plex [K15]; 1xTMT6plex [N-Term]; 1xPhospho [S10(100)]	1xTMT6plex [K15]; 1xTMT6plex [N-Term]; 1xPhospho [S3(0); T4(0); S5(0); S8(0); S10(100)]	Q9WV92 1xPhospho [S804(100)]	Q9WV92 1xPhospho [S797(0); T798(0); S799(0); S802(0); S804(100)]	2.41e-05	0	1.861	1	1	6	Q9WV92	Q9WV92	Band 4.1-like protein 3 OS=Mus musculus OX=10090 GN=Epb41l3 PE=1 SV=1	Epb41l3	Epb41l3_S804	YES	Q9WV92	Q9WV92 [795-809]	0	1914	15	0	0.778	1	0.981	-0.36	0	-0.03	0.0709979	0.982169	0.848554	0.450464	0.999661	0.998116	8.7	12.01	36.82	8.3746	8.16541	8.10486	0.754	0.778	1.031	0.694	0.853
6184	High	Unambiguous	RDYDDMSPR	[R].RDYDDMSPR.[R]	1xOxidation [M6]; 1xTMT6plex [N-Term]; 1xPhospho [S7(100)]	1xOxidation [M6]; 1xTMT6plex [N-Term]; 1xPhospho [Y3(0); S7(100)]	P61979 1xPhospho [S284(100)]	P61979 1xPhospho [Y280(0); S284(100)]	0.0625739	0.00595483	0.306	1	1	3	P61979	P61979	Heterogeneous nuclear ribonucleoprotein K OS=Mus musculus OX=10090 GN=Hnrnpk PE=1 SV=1	Hnrnpk	Hnrnpk_S284	YES	P61979	P61979 [278-286]	1	1479.61	9	0	0.905	0.909	0.988	-0.14	-0.14	-0.02	0.631668	0.53488	0.887221	0.98968	0.973801	0.99921	3.09	1.29	17.31	7.51333	7.10014	7.47573	0.905		0.724		0.928
1400	High	Unambiguous	VLLHSPGRPSSPR	[R].VLLHSPGRPSSPR.[F]	1xTMT6plex [N-Term]; 1xPhospho [S10(95.2)]	1xTMT6plex [N-Term]; 1xPhospho [S5(0); S10(95.2); S11(4.8)]	Q8R1G6 1xPhospho [S204(95.2)]	Q8R1G6 1xPhospho [S199(0); S204(95.2); S205(4.8)]	0.000124541	0	1.535	1	1	11	Q8R1G6	Q8R1G6	PDZ and LIM domain protein 2 OS=Mus musculus OX=10090 GN=Pdlim2 PE=1 SV=1	Pdlim2	Pdlim2_S204	YES	Q8R1G6	Q8R1G6 [195-207]	0	1711.92	13	0	0.931	0.968	0.823	-0.1	-0.05	-0.28	0.634912	0.850015	0.353884	0.98968	0.995193	0.921913	5.57	33.96	18.6	9.05338	8.18289	9.24341	0.793	0.765	0.971	0.931	0.937
3199	High	Unambiguous	KPSPQPSPPR	[K].KPSPQPSPPR.[Q]	1xTMT6plex [K1]; 1xTMT6plex [N-Term]; 2xPhospho [S3(100); S7(100)]	1xTMT6plex [K1]; 1xTMT6plex [N-Term]; 2xPhospho [S3(100); S7(100)]	O88874 2xPhospho [S325(100); S329(100)]	O88874 2xPhospho [S325(100); S329(100)]	0.000892491	0.000209709	1.137	1	1	6	O88874	O88874	Cyclin-K OS=Mus musculus OX=10090 GN=Ccnk PE=1 SV=3	Ccnk	Ccnk_S325;S329	YES	O88874	O88874 [323-332]	0	1708.86	10	0	0.975	0.971	0.782	-0.04	-0.04	-0.35	0.901558	0.84221	0.238257	0.999853	0.995193	0.791406	2.65	17.3	12.35	9.46818	9.0563	9.818	0.789		0.995	0.991	0.959
1646	High	Unambiguous	RSSISGTEEEEVPFTPDEQK	[R].RSSISGTEEEEVPFTPDEQK.[R]	1xTMT6plex [K20]; 1xTMT6plex [N-Term]; 1xPhospho [S/T]	1xTMT6plex [K20]; 1xTMT6plex [N-Term]; 1xPhospho [S2(3.5); S3(48.2); S5(48.2); T7(0); T15(0)]	Q62394 1xPhospho [S/T]	Q62394 1xPhospho [S17(3.5); S18(48.2); S20(48.2); T22(0); T30(0)]	1.77e-05	0	1.922	1	1	7	Q62394	Q62394	Zinc finger protein 185 OS=Mus musculus OX=10090 GN=Znf185 PE=1 SV=1	Znf185	Znf185_[S18/S20]	YES	Q62394	Q62394 [16-35]	1	2803.34	20	0	0.802	0.798	0.718	-0.32	-0.33	-0.48	0.193212	0.195605	0.250406	0.75853	0.799742	0.813634	5.01	15.87	1.6	7.51175	6.47249	7.75889	0.759	0.925	0.802
762	High	Unambiguous	LLQEGSPSDITTLSVEPEKK	[R].LLQEGSPSDITTLSVEPEKK.[D]	2xTMT6plex [K19; K20]; 1xTMT6plex [N-Term]; 1xPhospho [S6(99.9)]	2xTMT6plex [K19; K20]; 1xTMT6plex [N-Term]; 1xPhospho [S6(99.9); S8(0.1); T11(0); T12(0); S14(0)]	P70365 1xPhospho [S702(99.9)]	P70365 1xPhospho [S702(99.9); S704(0.1); T707(0); T708(0); S710(0)]	3.15e-05	0	1.808	1	1	4	P70365	P70365	Nuclear receptor coactivator 1 OS=Mus musculus OX=10090 GN=Ncoa1 PE=1 SV=2	Ncoa1	Ncoa1_S702	YES	P70365	P70365 [697-716]	1	2938.6	20	0	1.041	1.172	0.886	0.06	0.23	-0.17	0.707855	0.345037	0.609649	0.989834	0.920218	0.996923	12.12	18.4	25.27	6.12909	5.95899	6.28555	1.067		0.735	1.185	1.015
628	High	Unambiguous	HQVRTPSPLALEDTVELSSPPLSPTTK	[R].HQVRTPSPLALEDTVELSSPPLSPTTK.[L]	1xTMT6plex [K27]; 1xTMT6plex [N-Term]; 2xPhospho [T5(100); S7(100)]	1xTMT6plex [K27]; 1xTMT6plex [N-Term]; 2xPhospho [T5(100); S7(100); T14(0); S18(0); S19(0); S23(0); T25(0); T26(0)]	P19973 2xPhospho [T166(100); S168(100)]	P19973 2xPhospho [T166(100); S168(100); T175(0); S179(0); S180(0); S184(0); T186(0); T187(0)]	3.67e-06	0	2.234	1	1	38	P19973	P19973	Lymphocyte-specific protein 1 OS=Mus musculus OX=10090 GN=Lsp1 PE=1 SV=2	Lsp1	Lsp1_T166;S168	YES	P19973	P19973 [162-188]	1	3518.79	27	0	0.988	1.076	1.142	-0.02	0.11	0.19	0.925184	0.555678	0.688688	0.999853	0.981654	0.998116	8.45	14.88	19.01	9.64169	9.39232	9.84392	1.046	0.88	0.776	0.988	1.042
4029	High	Unambiguous	KSAPATGGVK	[R].KSAPATGGVK.[K]	2xTMT6plex [K1; K10]; 1xTMT6plex [N-Term]; 1xPhospho [S2(100)]	2xTMT6plex [K1; K10]; 1xTMT6plex [N-Term]; 1xPhospho [S2(100); T6(0)]	P68433 1xPhospho [S29(100)]; P84228 1xPhospho [S29(100)]	P68433 1xPhospho [S29(100); T33(0)]; P84228 1xPhospho [S29(100); T33(0)]	0.00320474	0.000530845	0.871	2	2	3	P68433; P84228	P68433	Histone H3.1 OS=Mus musculus OX=10090 GN=Hist1h3a PE=1 SV=2;Histone H3.2 OS=Mus musculus OX=10090 GN=Hist1h3b PE=1 SV=2	Hist1h3a	Hist1h3a_S29	YES	P68433; P84228	P68433 [28-37]; P84228 [28-37]	1	1682.98	10	0	0.582	1.28	1.697	-0.78	0.36	0.76	0.000151628	0.0710044	0.065495	0.00404394	0.547368	0.379731	14.01	42.37	50.4	9.70079	9.14491	9.09302	0.745	0.582	0.327
1647	High	Unambiguous	RSSLIETGQGAEGGFSLR	[K].RSSLIETGQGAEGGFSLR.[V]	1xTMT6plex [N-Term]; 1xPhospho [S/T]	1xTMT6plex [N-Term]; 1xPhospho [S2(50); S3(50); T7(0); S16(0)]	Q9DC04 1xPhospho [S/T]	Q9DC04 1xPhospho [S685(50); S686(50); T690(0); S699(0)]	4.87e-07	0	2.634	1	1	9	Q9DC04	Q9DC04	Regulator of G-protein signaling 3 OS=Mus musculus OX=10090 GN=Rgs3 PE=1 SV=2	Rgs3	Rgs3_S686	YES	Q9DC04	Q9DC04 [684-701]	1	2174.08	18	0	0.803	1.113	0.79	-0.32	0.15	-0.34	0.233674	0.499868	0.383972	0.81305	0.965376	0.940098	5.2	27.1	52.46	6.56834	5.94017	6.71836	0.639	0.803	0.847	0.84	0.729
4394	High	Unambiguous	KEESEESEDDMGFGLFD	[K].KEESEESEDDMGFGLFD.[-]	1xTMT6plex [K1]; 1xTMT6plex [N-Term]; 2xPhospho [S4(100); S7(100)]	1xTMT6plex [K1]; 1xTMT6plex [N-Term]; 2xPhospho [S4(100); S7(100)]	P47955 2xPhospho [S101(100); S104(100)]	P47955 2xPhospho [S101(100); S104(100)]	0.0067363	0.000907142	0.72	1	1	10	P47955	P47955	60S acidic ribosomal protein P1 OS=Mus musculus OX=10090 GN=Rplp1 PE=1 SV=1	Rplp1	Rplp1_S101;S104	NO	P47955	P47955 [98-114]	1	2582.03	17	0	0.748	0.824	1.068	-0.42	-0.28	0.1	0.0711943	0.245238	0.783538	0.450581	0.852244	0.998116	13.2	20.25	18.09	7.47816	7.73944	7.69836	0.748	0.702	0.629	0.93	1.212
3275	High	Unambiguous	LVEPHSPSPSSK	[R].LVEPHSPSPSSK.[F]	1xTMT6plex [K12]; 1xTMT6plex [N-Term]; 1xPhospho [S6(100)]	1xTMT6plex [K12]; 1xTMT6plex [N-Term]; 1xPhospho [S6(100); S8(0); S10(0); S11(0)]	Q8BZ47 1xPhospho [S575(100)]	Q8BZ47 1xPhospho [S575(100); S577(0); S579(0); S580(0)]	0.00118633	0.000209709	1.078	1	1	7	Q8BZ47	Q8BZ47	Zinc finger protein 609 OS=Mus musculus OX=10090 GN=Znf609 PE=1 SV=2	Znf609	Znf609_S575	YES	Q8BZ47	Q8BZ47 [570-581]	0	1802.95	12	0	0.978	0.96	1.209	-0.03	-0.06	0.27	0.88297	0.72739	0.588212	0.999182	0.99264	0.996923	13.34	12.18	30.29	9.29715	8.79442	8.89875	0.687	0.978	0.763	1.07	1.064
3280	High	Unambiguous	IEDSEPHIPLIDDTDAEDDAPTKR	[R].IEDSEPHIPLIDDTDAEDDAPTKR.[N]	1xTMT6plex [K23]; 1xTMT6plex [N-Term]; 1xPhospho [S4(100)]	1xTMT6plex [K23]; 1xTMT6plex [N-Term]; 1xPhospho [S4(100); T14(0); T22(0)]	G5E829 1xPhospho [S1155(100)]	G5E829 1xPhospho [S1155(100); T1165(0); T1173(0)]	0.000818011	0.000209709	1.155	1	1	3	G5E829	G5E829	Plasma membrane calcium-transporting ATPase 1 OS=Mus musculus OX=10090 GN=Atp2b1 PE=1 SV=1	Atp2b1	Atp2b1_S1155	YES	G5E829	G5E829 [1152-1175]	1	3230.55	24	0	0.812	1.079	0.809	-0.3	0.11	-0.3	0.228576	0.582871	0.436276	0.810737	0.983139	0.96765	10.54	35.36	12.47	7.6532	6.91886	7.69488	0.724		0.812		1.066
2236	High	Unambiguous	ETAAAHQASSSPPIDAATAEPYGFR	[K].ETAAAHQASSSPPIDAATAEPYGFR.[S]	1xTMT6plex [N-Term]; 1xPhospho [S11(98.8)]	1xTMT6plex [N-Term]; 1xPhospho [T2(0); S9(0); S10(1.2); S11(98.8); T18(0); Y22(0)]	P14873 1xPhospho [S1815(98.8)]	P14873 1xPhospho [T1806(0); S1813(0); S1814(1.2); S1815(98.8); T1822(0); Y1826(0)]	8.27e-07	0	2.529	1	1	7	P14873	P14873	Microtubule-associated protein 1B OS=Mus musculus OX=10090 GN=Map1b PE=1 SV=2	Map1b	Map1b_S1815	YES	P14873	P14873 [1805-1829]	0	2854.32	25	0	0.848	0.855	1.02	-0.24	-0.23	0.03	0.401727	0.359176	0.962844	0.947482	0.922977	0.999899	7.98	13.07	34.12	7.08108	6.71973	7.22593	0.911		0.848		0.699
377	High	Unambiguous	NSNLMQANQTENHQLAESPGHLDSCELQVQLNNR	[R].NSNLMQANQTENHQLAESPGHLDSCELQVQLNNR.[D]	1xCarbamidomethyl [C25]; 1xOxidation [M5]; 1xTMT6plex [N-Term]; 1xPhospho [S18(96.7)]	1xCarbamidomethyl [C25]; 1xOxidation [M5]; 1xTMT6plex [N-Term]; 1xPhospho [S2(0); T10(0); S18(96.7); S24(3.3)]	O35892 1xPhospho [S190(96.7)]	O35892 1xPhospho [S174(0); T182(0); S190(96.7); S196(3.3)]	9.3e-05	0	1.593	1	1	6	O35892	O35892	Nuclear autoantigen Sp-100 OS=Mus musculus OX=10090 GN=Sp100 PE=1 SV=2	Sp100	Sp100_S190	YES	O35892	O35892 [173-206]	0	4214.92	34	0	0.927	1.106	0.991	-0.11	0.15	-0.01	0.775482	0.524518	0.940883	0.998955	0.971331	0.999899	3.77	3.62	15.12	6.69766	5.9542	6.97269	0.739	0.899	0.927	1.146	0.944
5640	High	Unambiguous	DLVQPDKPASPK	[R].DLVQPDKPASPK.[F]	2xTMT6plex [K7; K12]; 1xTMT6plex [N-Term]; 1xPhospho [S10(100)]	2xTMT6plex [K7; K12]; 1xTMT6plex [N-Term]; 1xPhospho [S10(100)]	Q8BJ05 1xPhospho [S515(100)]	Q8BJ05 1xPhospho [S515(100)]	0.0288354	0.00285375	0.445	1	1	5	Q8BJ05	Q8BJ05	Zinc finger CCCH domain-containing protein 14 OS=Mus musculus OX=10090 GN=Zc3h14 PE=1 SV=1	Zc3h14	Zc3h14_S515	YES	Q8BJ05	Q8BJ05 [506-517]	0	2062.16	12	0	0.759	0.883	0.894	-0.4	-0.18	-0.16	0.0568189	0.379266	0.530527	0.393334	0.932643	0.996923	3.64	15.95	16.45	9.43678	9.05039	9.86153	0.695	0.759		0.759	0.899
3026	High	Unambiguous	SLLGESAPALHLNKGTPSQSPVVGR	[K].SLLGESAPALHLNKGTPSQSPVVGR.[S]	1xTMT6plex [K14]; 1xTMT6plex [N-Term]; 2xPhospho [T16(99.8); S]	1xTMT6plex [K14]; 1xTMT6plex [N-Term]; 2xPhospho [S1(0); S6(0); T16(99.8); S18(50.1); S20(50.1)]	Q8K2K6 2xPhospho [T177(99.8); S]	Q8K2K6 2xPhospho [S162(0); S167(0); T177(99.8); S179(50.1); S181(50.1)]	0.00122697	0.000209709	1.071	1	1	4	Q8K2K6	Q8K2K6	Arf-GAP domain and FG repeat-containing protein 1 OS=Mus musculus OX=10090 GN=Agfg1 PE=1 SV=2	Agfg1	Agfg1_T177;[S179/S181]	YES	Q8K2K6	Q8K2K6 [162-186]	1	3133.62	25	0	0.782	0.987	0.832	-0.35	-0.02	-0.27	0.158376	0.934034	0.436016	0.694642	0.997187	0.967641	10.77	45.07	24.79	8.11946	7.37678	8.15987	0.62			0.875	0.782
3272	High	Unambiguous	NVAEALGHSPKDPGGGGGSVR	[K].NVAEALGHSPKDPGGGGGSVR.[A]	1xTMT6plex [K11]; 1xTMT6plex [N-Term]; 1xPhospho [S9(100)]	1xTMT6plex [K11]; 1xTMT6plex [N-Term]; 1xPhospho [S9(100); S19(0)]	Q8R3Y8 1xPhospho [S436(100)]	Q8R3Y8 1xPhospho [S436(100); S446(0)]	0.00122108	0.000209709	1.072	1	1	4	Q8R3Y8	Q8R3Y8	Interferon regulatory factor 2-binding protein 1 OS=Mus musculus OX=10090 GN=Irf2bp1 PE=1 SV=2	Irf2bp1	Irf2bp1_S436	YES	Q8R3Y8	Q8R3Y8 [428-448]	1	2500.27	21	0	0.909	1.067	1.12	-0.14	0.09	0.16	0.550867	0.688771	0.805336	0.98968	0.99264	0.998116	4.15	3.4	21.26	8.24493	8.12663	8.6308	0.927	1.047	0.865	0.892
1819	High	Unambiguous	SSPPATDPGPVPSSPSQEPPTKR	[R].SSPPATDPGPVPSSPSQEPPTKR.[E]	1xTMT6plex [K22]; 1xTMT6plex [N-Term]; 1xPhospho [S2(99.2)]	1xTMT6plex [K22]; 1xTMT6plex [N-Term]; 1xPhospho [S1(0.8); S2(99.2); T6(0); S13(0); S14(0); S16(0); T21(0)]	Q922Y1 1xPhospho [S188(99.2)]	Q922Y1 1xPhospho [S187(0.8); S188(99.2); T192(0); S199(0); S200(0); S202(0); T207(0)]	0.000146255	0	1.503	1	1	13	Q922Y1	Q922Y1	UBX domain-containing protein 1 OS=Mus musculus OX=10090 GN=Ubxn1 PE=1 SV=1	Ubxn1	Ubxn1_[S200/S202]	YES	Q922Y1	Q922Y1 [187-209]	1	2854.44	23	0	0.873	1.045	0.934	-0.2	0.06	-0.1	0.437854	0.745898	0.672478	0.966355	0.99264	0.998116	13.51	15.62	21.55	7.98071	7.33896	8.36588	0.471	0.977	0.928	0.756	0.873
2130	High	Unambiguous	DRGGDTSDTESSIIIR	[R].DRGGDTSDTESSIIIR.[R]	1xTMT6plex [N-Term]; 1xPhospho [S/T]	1xTMT6plex [N-Term]; 1xPhospho [T6(3.7); S7(48.1); T9(48.1); S11(0); S12(0)]	O35892 1xPhospho [S/T]	O35892 1xPhospho [T313(3.7); S314(48.1); T316(48.1); S318(0); S319(0)]	0.000123916	0	1.536	1	1	26	O35892	O35892	Nuclear autoantigen Sp-100 OS=Mus musculus OX=10090 GN=Sp100 PE=1 SV=2	Sp100	Sp100_[S314/T316]	YES	O35892	O35892 [308-323]	1	2030.96	16	0	0.994	1.241	0.937	-0.01	0.31	-0.09	0.912286	0.0867981	0.678246	0.999853	0.601342	0.998116	14.37	20.07	31.66	10.3839	9.56415	10.7295	0.767	0.994	0.695	1.092	1.037
1620	High	Unambiguous	RGNNSAVGSNADLTIEEDEEEEPVALQQAQQVR	[R].RGNNSAVGSNADLTIEEDEEEEPVALQQAQQVR.[Y]	1xTMT6plex [N-Term]; 2xPhospho [S5(100); S9(85.7)]	1xTMT6plex [N-Term]; 2xPhospho [S5(100); S9(85.7); T14(14.3)]	Q63918 2xPhospho [S359(100); S363(85.7)]	Q63918 2xPhospho [S359(100); S363(85.7); T368(14.3)]	9.54e-05	0	1.588	1	1	10	Q63918	Q63918	Caveolae-associated protein 2 OS=Mus musculus OX=10090 GN=Cavin2 PE=1 SV=3	Cavin2	Cavin2_S359;S363	YES	Q63918	Q63918 [355-387]	1	3985.8	33	0	0.746	1.089	0.912	-0.42	0.12	-0.13	0.159313	0.628815	0.735932	0.697146	0.99264	0.998116	13.06	13.95	23.56	5.67807	5.55152	6.06178	0.746		1.11	0.628
3637	High	Unambiguous	TAMGSNQASPAR	[K].TAMGSNQASPAR.[R]	1xOxidation [M3]; 1xTMT6plex [N-Term]; 1xPhospho [S9(100)]	1xOxidation [M3]; 1xTMT6plex [N-Term]; 1xPhospho [T1(0); S5(0); S9(100)]	Q3UW53 1xPhospho [S595(100)]	Q3UW53 1xPhospho [T587(0); S591(0); S595(100)]	0.00171715	0.000530845	1.001	1	1	4	Q3UW53	Q3UW53	Protein Niban OS=Mus musculus OX=10090 GN=Fam129a PE=1 SV=2	Fam129a	Fam129a_S595	YES	Q3UW53	Q3UW53 [587-598]	0	1515.68	12	0	0.782	1.046	0.477	-0.35	0.07	-1.07	0.17537	0.706425	0.0100561	0.731548	0.99264	0.0947166	0.62	8.49	18.36	6.93782	6.49185	7.65607	0.901	0.777	0.782
4170	High	Unambiguous	ARPAQAPVSEELPPSPKPGK	[R].ARPAQAPVSEELPPSPKPGK.[K]	2xTMT6plex [K17; K20]; 1xTMT6plex [N-Term]; 1xPhospho [S15(100)]	2xTMT6plex [K17; K20]; 1xTMT6plex [N-Term]; 1xPhospho [S9(0); S15(100)]	Q6PGL7 1xPhospho [S388(100)]	Q6PGL7 1xPhospho [S382(0); S388(100)]	0.0039278	0.000677187	0.829	1	1	6	Q6PGL7	Q6PGL7	WASH complex subunit 2 OS=Mus musculus OX=10090 GN=Washc2 PE=1 SV=1	Washc2	Washc2_S388	YES	Q6PGL7	Q6PGL7 [374-393]	0	2823.57	20	0	0.901	1.045	1.135	-0.15	0.06	0.18	0.452389	0.727833	0.72273	0.96922	0.99264	0.998116	0.25	0.59	31.65	9.69035	9.08375	9.71339	0.901	1.055			0.899
5785	High	Unambiguous	GTDDSPKNSQEDLQDR	[R].GTDDSPKNSQEDLQDR.[H]	1xTMT6plex [K7]; 1xTMT6plex [N-Term]; 1xPhospho [S5(100)]	1xTMT6plex [K7]; 1xTMT6plex [N-Term]; 1xPhospho [T2(0); S5(100); S9(0)]	Q8R0A5 1xPhospho [S120(100)]	Q8R0A5 1xPhospho [T117(0); S120(100); S124(0)]	0.0351078	0.00388682	0.409	1	2	9	Q8R0A5	Q8R0A5	Transcription elongation factor A protein-like 3 OS=Mus musculus OX=10090 GN=Tceal3 PE=1 SV=2	Tceal3	Tceal3_S120	YES	Q8CCT4; Q8R0A5	Q8R0A5 [116-131]	1	2343.09	16	0	0.898	0.942	0.878	-0.15	-0.09	-0.19	0.41789	0.662852	0.484978	0.955672	0.99264	0.984677	13.65	4.24	24.16	10.2413	9.65711	10.7184	0.765	1.054		0.832	0.97
3840	High	Unambiguous	ASPDQNASTHTPQSSAKPSVPSSK	[K].ASPDQNASTHTPQSSAKPSVPSSK.[S]	2xTMT6plex [K17; K24]; 1xTMT6plex [N-Term]; 1xPhospho [T11(99.5)]	2xTMT6plex [K17; K24]; 1xTMT6plex [N-Term]; 1xPhospho [S2(0); S8(0.1); T9(0.3); T11(99.5); S14(0.1); S15(0.1); S19(0.1); S22(0); S23(0)]	Q99KN9 1xPhospho [T316(99.5)]	Q99KN9 1xPhospho [S307(0); S313(0.1); T314(0.3); T316(99.5); S319(0.1); S320(0.1); S324(0.1); S327(0); S328(0)]	0.00188995	0.000530845	0.981	1	1	5	Q99KN9	Q99KN9	Clathrin interactor 1 OS=Mus musculus OX=10090 GN=Clint1 PE=1 SV=2	Clint1	Clint1_S324	YES	Q99KN9	Q99KN9 [306-329]	0	3176.62	24	0	1.056	0.916	1.217	0.08	-0.13	0.28	0.658474	0.667775	0.560205	0.98968	0.99264	0.996923	14.71	8.26	21.78	7.99605	7.56605	8.50383	1.056	0.809		1.161
274	High	Unambiguous	RASVCAEAYNPDEEEDDAESR	[R].RASVCAEAYNPDEEEDDAESR.[I]	1xCarbamidomethyl [C5]; 1xTMT6plex [N-Term]; 1xPhospho [S3(100)]	1xCarbamidomethyl [C5]; 1xTMT6plex [N-Term]; 1xPhospho [S3(100); Y9(0); S20(0)]	P31324 1xPhospho [S112(100)]	P31324 1xPhospho [S112(100); Y118(0); S129(0)]	3.28e-07	0	2.712	1	1	7	P31324	P31324	cAMP-dependent protein kinase type II-beta regulatory subunit OS=Mus musculus OX=10090 GN=Prkar2b PE=1 SV=3	Prkar2b	Prkar2b_S112	YES	P31324	P31324 [110-130]	1	2722.11	21	0	0.838	1.028	0.885	-0.25	0.04	-0.18	0.315807	0.814268	0.608128	0.890526	0.994856	0.996923	2.64	22.89	31.61	7.91941	7.37548	7.93304	0.808	0.827	0.906		0.85
3284	High	Unambiguous	YSPTSPTYSPTSPK	[K].YSPTSPTYSPTSPK.[YG]	1xTMT6plex [K14]; 1xTMT6plex [N-Term]; 1xPhospho [S12(99.7)]	1xTMT6plex [K14]; 1xTMT6plex [N-Term]; 1xPhospho [Y1(0); S2(0); T4(0); S5(0); T7(0); Y8(0); S9(0); T11(0.3); S12(99.7)]	P08775 1xPhospho [S1920(99.7)]; 1xPhospho [S3842(99.7)]	P08775 1xPhospho [Y1909(0); S1910(0); T1912(0); S1913(0); T1915(0); Y1916(0); S1917(0); T1919(0.3); S1920(99.7)]; 1xPhospho [Y3831(0); S3832(0); T3834(0); S3835(0); T3837(0); Y3838(0); S3839(0); T3841(0.3); S3842(99.7)]	0.000842136	0.000209709	1.149	1	1	6	P08775	P08775	DNA-directed RNA polymerase II subunit RPB1 OS=Mus musculus OX=10090 GN=Polr2a PE=1 SV=3	Polr2a	Polr2a_S1920	YES	P08775	P08775 [1909-1922]; [1923-1936]	0	2051.01	14	0	0.859	1.005	0.912	-0.22	0.01	-0.13	0.256295	0.954293	0.616342	0.835735	0.997578	0.996923	8.19	5.83	7.94	8.39947	7.77786	8.63223	0.911	0.985	0.809		0.783
3398	High	Unambiguous	RGASASPQGRQSPSPSTRPIR	[R].RGASASPQGRQSPSPSTRPIR.[R]	1xTMT6plex [N-Term]; 4xPhospho [S4(100); S6(100); S12(100); S14(99.8)]	1xTMT6plex [N-Term]; 4xPhospho [S4(100); S6(100); S12(100); S14(99.8); S16(0.2); T17(0)]	Q52KI8 4xPhospho [S723(100); S725(100); S731(100); S733(99.8)]	Q52KI8 4xPhospho [S723(100); S725(100); S731(100); S733(99.8); S735(0.2); T736(0)]	0.0013903	0.000404169	1.045	1	1	5	Q52KI8	Q52KI8	Serine/arginine repetitive matrix protein 1 OS=Mus musculus OX=10090 GN=Srrm1 PE=1 SV=2	Srrm1	Srrm1_S723;S725;S731;S733	YES	Q52KI8	Q52KI8 [720-740]	2	2742.19	21	0	1.073	1.178	1.528	0.1	0.24	0.61	0.6691	0.317049	0.172002	0.98968	0.903624	0.676124	23.98	20.62	17.74	8.47519	8.09826	8.50667	0.481	1.268	0.939	1.225
1415	High	Unambiguous	VEEEPISPGSTLPEVK	[K].VEEEPISPGSTLPEVK.[L]	1xTMT6plex [K16]; 1xTMT6plex [N-Term]; 1xPhospho [S7(100)]	1xTMT6plex [K16]; 1xTMT6plex [N-Term]; 1xPhospho [S7(100); S10(0); T11(0)]	Q8C3J5 1xPhospho [S1683(100)]	Q8C3J5 1xPhospho [S1683(100); S1686(0); T1687(0)]	4.26e-05	0	1.748	1	1	8	Q8C3J5	Q8C3J5	Dedicator of cytokinesis protein 2 OS=Mus musculus OX=10090 GN=Dock2 PE=1 SV=3	Dock2	Dock2_S1683	YES	Q8C3J5	Q8C3J5 [1677-1692]	0	2249.17	16	0	0.913	0.864	0.827	-0.13	-0.21	-0.27	0.511879	0.351874	0.443975	0.979989	0.922977	0.970927	14.76	10.18	36.19	8.48623	8.15381	8.95012	0.804	0.913	1.104	1.089	0.844
2612	High	Unambiguous	DAPTSPASVASSSSTPSSK	[K].DAPTSPASVASSSSTPSSK.[T]	1xTMT6plex [K19]; 1xTMT6plex [N-Term]; 1xPhospho [T/S]	1xTMT6plex [K19]; 1xTMT6plex [N-Term]; 1xPhospho [T4(49.9); S5(49.9); S8(0.2); S11(0); S12(0); S13(0); S14(0); T15(0); S17(0); S18(0)]	Q08122 1xPhospho [T/S]	Q08122 1xPhospho [T285(49.9); S286(49.9); S289(0.2); S292(0); S293(0); S294(0); S295(0); T296(0); S298(0); S299(0)]	4.56e-07	0	2.647	1	1	13	Q08122	Q08122	Transducin-like enhancer protein 3 OS=Mus musculus OX=10090 GN=Tle3 PE=1 SV=3	Tle3	Tle3_[T285/S286]	YES	Q08122	Q08122 [282-300]	0	2302.12	19	0	0.905	0.919	0.972	-0.14	-0.12	-0.04	0.508717	0.582527	0.813866	0.979989	0.983139	0.998116	17.73	18.79	41.28	8.75355	8.38802	9.16842	0.773	0.932	0.905	1.039	0.773
2367	High	Unambiguous	AGSEECVFYTDEVASPLAPDLAK	[R].AGSEECVFYTDEVASPLAPDLAK.[A]	1xCarbamidomethyl [C6]; 1xTMT6plex [K23]; 1xTMT6plex [N-Term]; 1xPhospho [S3(100)]	1xCarbamidomethyl [C6]; 1xTMT6plex [K23]; 1xTMT6plex [N-Term]; 1xPhospho [S3(100); Y9(0); T10(0); S15(0)]	Q6P9S0 1xPhospho [S575(100)]	Q6P9S0 1xPhospho [S575(100); Y581(0); T582(0); S587(0)]	3.44e-06	0	2.247	1	1	7	Q6P9S0	Q6P9S0	MTSS1-like protein OS=Mus musculus OX=10090 GN=Mtss1l PE=1 SV=1	Mtss1l	Mtss1l_S575	YES	Q6P9S0	Q6P9S0 [573-595]	0	3007.44	23	0	0.851	0.984	0.639	-0.23	-0.02	-0.65	0.372451	0.998662	0.102928	0.927228	0.999874	0.504093	4.33	10.48	14.5	7.54328	6.70167	7.58123	0.844		0.859	0.913	0.743
2908	High	Unambiguous	FTLSGVDGDSWSSGED	[K].FTLSGVDGDSWSSGED.[-]	1xTMT6plex [N-Term]; 2xPhospho [S12(100); S13(100)]	1xTMT6plex [N-Term]; 2xPhospho [T2(0); S4(0); S10(0); S12(100); S13(100)]	Q6P5H2 2xPhospho [S1860(100); S1861(100)]	Q6P5H2 2xPhospho [T1850(0); S1852(0); S1858(0); S1860(100); S1861(100)]	5.99e-07	0	2.593	1	1	7	Q6P5H2	Q6P5H2	Nestin OS=Mus musculus OX=10090 GN=Nes PE=1 SV=1	Nes	Nes_S1860;S1861	YES	Q6P5H2	Q6P5H2 [1849-1864]	0	2047.78	16	0	1.05	0.863	2.81	0.07	-0.21	1.49	0.698015	0.439299	0.000595073	0.98968	0.958593	0.00932607	14.83	14.39	128.56	5.58402	6.35806	5.46159	0.995	1.107	0.761		1.203
904	High	Unambiguous	KTAQTPQQDAESPETPTYENFT	[K].KTAQTPQQDAESPETPTYENFT.[-]	1xTMT6plex [K1]; 1xTMT6plex [N-Term]; 1xPhospho [T15(99.4)]	1xTMT6plex [K1]; 1xTMT6plex [N-Term]; 1xPhospho [T2(0); T5(0); S12(0); T15(99.4); T17(0.6); Y18(0.1); T22(0)]	Q01965 1xPhospho [T647(99.4)]	Q01965 1xPhospho [T634(0); T637(0); S644(0); T647(99.4); T649(0.6); Y650(0.1); T654(0)]	0.000132946	0	1.522	1	1	10	Q01965	Q01965	T-lymphocyte surface antigen Ly-9 OS=Mus musculus OX=10090 GN=Ly9 PE=1 SV=2	Ly9	Ly9_T647	YES	Q01965	Q01965 [633-654]	1	3021.41	22	0	0.813	1.022	1.286	-0.3	0.03	0.36	0.236288	0.809792	0.414869	0.81305	0.994856	0.95616	6.45	21.99	17.53	7.65142	7.11484	8.0298	0.813	0.812	0.706	1.026
3224	High	Unambiguous	AFLAELEQNSPK	[K].AFLAELEQNSPK.[I]	1xTMT6plex [K12]; 1xTMT6plex [N-Term]; 1xPhospho [S10(100)]	1xTMT6plex [K12]; 1xTMT6plex [N-Term]; 1xPhospho [S10(100)]	Q9QXZ0 1xPhospho [S4483(100)]	Q9QXZ0 1xPhospho [S4483(100)]	0.000987802	0.000209709	1.116	1	1	5	Q9QXZ0	Q9QXZ0	Microtubule-actin cross-linking factor 1 OS=Mus musculus OX=10090 GN=Macf1 PE=1 SV=2	Macf1	Macf1_S4483	YES	Q9QXZ0	Q9QXZ0 [4474-4485]	0	1884.99	12	0	0.69	1.03	1.567	-0.54	0.04	0.65	0.00855355	0.750191	0.141781	0.104359	0.99264	0.604817	16.06	53.24	79.28	8.37723	7.1243	8.05655	0.474	0.801	0.594		0.893
4884	High	Unambiguous	ASSEPEVCK	[R].ASSEPEVCK.[V]	1xCarbamidomethyl [C8]; 1xTMT6plex [K9]; 1xTMT6plex [N-Term]; 1xPhospho [S3(95.3)]	1xCarbamidomethyl [C8]; 1xTMT6plex [K9]; 1xTMT6plex [N-Term]; 1xPhospho [S2(4.7); S3(95.3)]	Q6BCL1 1xPhospho [S332(95.3)]	Q6BCL1 1xPhospho [S331(4.7); S332(95.3)]	0.0102671	0.00118916	0.638	1	1	3	Q6BCL1	Q6BCL1	PML-RARA-regulated adapter molecule 1 OS=Mus musculus OX=10090 GN=Pram1 PE=1 SV=2	Pram1	Pram1_S332	YES	Q6BCL1	Q6BCL1 [330-338]	0	1544.74	9	0	0.966	0.964	0.891	-0.05	-0.05	-0.17	0.834827	0.849999	0.578718	0.999182	0.995193	0.996923	10.67	1.35	60.11	8.89875	8.32643	8.86821	1.082	0.891			0.966
1223	High	Unambiguous	VPCNVEGISPELEK	[R].VPCNVEGISPELEK.[V]	1xCarbamidomethyl [C3]; 1xTMT6plex [K14]; 1xTMT6plex [N-Term]; 1xPhospho [S9(100)]	1xCarbamidomethyl [C3]; 1xTMT6plex [K14]; 1xTMT6plex [N-Term]; 1xPhospho [S9(100)]	Q8K3I9 1xPhospho [S293(100)]	Q8K3I9 1xPhospho [S293(100)]	3.95e-05	0	1.763	1	1	4	Q8K3I9	Q8K3I9	Glucocorticoid-induced transcript 1 protein OS=Mus musculus OX=10090 GN=Glcci1 PE=1 SV=1	Glcci1	Glcci1_S293	YES	Q8K3I9	Q8K3I9 [285-298]	0	2109.07	14	0	0.878	0.784	0.977	-0.19	-0.35	-0.03	0.331238	0.13289	0.820798	0.899759	0.70934	0.998116	8.51	1.83	19.11	8.38763	7.82141	8.36837	0.833	0.794		0.989	0.925
644	High	Unambiguous	HAFSPVASVESASGETLHSPK	[R].HAFSPVASVESASGETLHSPK.[V]	1xTMT6plex [K21]; 1xTMT6plex [N-Term]; 3xPhospho [S8(100); S11(100); S13(99.9)]	1xTMT6plex [K21]; 1xTMT6plex [N-Term]; 3xPhospho [S4(0); S8(100); S11(100); S13(99.9); T16(0.1); S19(0)]	P29699 3xPhospho [S309(100); S312(100); S314(99.9)]	P29699 3xPhospho [S305(0); S309(100); S312(100); S314(99.9); T317(0.1); S320(0)]	9.53e-07	0	2.501	1	1	12	P29699	P29699	Alpha-2-HS-glycoprotein OS=Mus musculus OX=10090 GN=Ahsg PE=1 SV=1	Ahsg	Ahsg_S309;S312;S314	YES	P29699	P29699 [302-322]	0	2836.28	21	0	0.717	1.059	0.945	-0.48	0.08	-0.08	0.0182549	0.631121	0.681703	0.18427	0.99264	0.998116	9.33	3.42	16.04	9.93708	9.50204	9.60566	0.517	0.805	0.687	0.717	1.127
4748	High	Unambiguous	SSLVTSK	[K].SSLVTSK.[L]	1xTMT6plex [K7]; 1xTMT6plex [N-Term]; 1xPhospho [S2(95.8)]	1xTMT6plex [K7]; 1xTMT6plex [N-Term]; 1xPhospho [S1(4.2); S2(95.8); T5(0); S6(0)]	P60840 1xPhospho [S109(95.8)]	P60840 1xPhospho [S108(4.2); S109(95.8); T112(0); S113(0)]	0.00624633	0.000907142	0.735	1	1	6	P60840	P60840	Alpha-endosulfine OS=Mus musculus OX=10090 GN=Ensa PE=1 SV=1	Ensa	Ensa_S109	YES	P60840	P60840 [108-114]	0	1259.7	7	0	0.762	0.99	0.686	-0.39	-0.01	-0.54	0.0513016	0.967443	0.0766517	0.368916	0.998927	0.420418	4.56	6.51	20.36	10.5711	9.5147	10.6882	0.725	0.8	0.522		0.804
991	High	Unambiguous	TSALLFSSDEEDQWNIADSHTK	[K].TSALLFSSDEEDQWNIADSHTK.[L]	1xTMT6plex [K22]; 1xTMT6plex [N-Term]; 2xPhospho [S7(100); S8(100)]	1xTMT6plex [K22]; 1xTMT6plex [N-Term]; 2xPhospho [T1(0); S2(0); S7(100); S8(100); S19(0); T21(0)]	Q6PGL7 2xPhospho [S613(100); S614(100)]	Q6PGL7 2xPhospho [T607(0); S608(0); S613(100); S614(100); S625(0); T627(0)]	3.44e-06	0	2.247	1	1	5	Q6PGL7	Q6PGL7	WASH complex subunit 2 OS=Mus musculus OX=10090 GN=Washc2 PE=1 SV=1	Washc2	Washc2_S613;S614	YES	Q6PGL7	Q6PGL7 [607-628]	0	3112.4	22	0	0.914	1.055	0.978	-0.13	0.08	-0.03	0.647537	0.693933	0.931802	0.98968	0.99264	0.999462	12.57	2.31	27.57	7.31114	6.88896	7.82441	0.985		0.848	0.8	1.199
1193	High	Unambiguous	VSSGGLTESLFILK	[R].VSSGGLTESLFILK.[E]	1xTMT6plex [K14]; 1xTMT6plex [N-Term]; 1xPhospho [S2(95.5)]	1xTMT6plex [K14]; 1xTMT6plex [N-Term]; 1xPhospho [S2(95.5); S3(4.5); T7(0); S9(0)]	Q3U1T9 1xPhospho [S632(95.5)]	Q3U1T9 1xPhospho [S632(95.5); S633(4.5); T637(0); S639(0)]	0.000335084	0	1.337	1	1	12	Q3U1T9	Q3U1T9	DENN domain-containing protein 1B OS=Mus musculus OX=10090 GN=Dennd1b PE=1 SV=3	Dennd1b	Dennd1b_S632	YES	Q3U1T9	Q3U1T9 [631-644]	0	1989.11	14	0	1.01	0.922	0.924	0.01	-0.12	-0.11	0.814914	0.642638	0.746814	0.998955	0.99264	0.998116	13.39	37.6	49.89	5.96539	5.20849	6.32071	0.872	1.173	1.055	0.968
6351	High	Unambiguous	SASPGLPK	[K].SASPGLPK.[G]	1xTMT6plex [K8]; 1xTMT6plex [N-Term]; 1xPhospho [S3(100)]	1xTMT6plex [K8]; 1xTMT6plex [N-Term]; 1xPhospho [S1(0); S3(100)]	Q9EQU5 1xPhospho [S30(100)]	Q9EQU5 1xPhospho [S28(0); S30(100)]	0.0818694	0.00777785	0.26	1	1	9	Q9EQU5	Q9EQU5	Protein SET OS=Mus musculus OX=10090 GN=Set PE=1 SV=1	Set	Set_S30	YES	Q9EQU5	Q9EQU5 [28-35]	0	1294.72	8	0	1.141	1.179	1.903	0.19	0.24	0.93	0.399616	0.14446	0.00773145	0.946862	0.732233	0.075926	19.12	22.24	80.08	11.304	11.0668	11.3017	0.863	1.141	0.744	1.205	1.288
2977	High	Unambiguous	HSANAESILGTCSDLDEESPPPVPVK	[R].HSANAESILGTCSDLDEESPPPVPVK.[L]	1xCarbamidomethyl [C12]; 1xTMT6plex [K26]; 1xTMT6plex [N-Term]; 1xPhospho [S13(87.4)]	1xCarbamidomethyl [C12]; 1xTMT6plex [K26]; 1xTMT6plex [N-Term]; 1xPhospho [S2(0); S7(0.3); T11(12.3); S13(87.4); S19(0)]	Q3U1F9 1xPhospho [S247(87.4)]	Q3U1F9 1xPhospho [S236(0); S241(0.3); T245(12.3); S247(87.4); S253(0)]	0.00100706	0.000209709	1.112	1	1	3	Q3U1F9	Q3U1F9	Phosphoprotein associated with glycosphingolipid-enriched microdomains 1 OS=Mus musculus OX=10090 GN=Pag1 PE=1 SV=2	Pag1	Pag1_S247	NO	Q3U1F9	Q3U1F9 [235-260]	0	3287.59	26	0	0.878	1.166	1.001	-0.19	0.22	0	0.643178	0.506786	0.996756	0.98968	0.968071	0.999899	10.45	3.59	0.99	4.90689	4.80735	5.48543	0.798	0.878	1.149
865	High	Unambiguous	IAGTPGTGGRLSPENNQVLTK	[K].IAGTPGTGGRLSPENNQVLTK.[K]	1xTMT6plex [K21]; 1xTMT6plex [N-Term]; 1xPhospho [S12(99.8)]	1xTMT6plex [K21]; 1xTMT6plex [N-Term]; 1xPhospho [T4(0); T7(0.2); S12(99.8); T20(0)]	Q8VE65 1xPhospho [S51(99.8)]	Q8VE65 1xPhospho [T43(0); T46(0.2); S51(99.8); T59(0)]	0.000204613	0	1.436	1	1	5	Q8VE65	Q8VE65	Transcription initiation factor TFIID subunit 12 OS=Mus musculus OX=10090 GN=Taf12 PE=1 SV=1	Taf12	Taf12_S51	YES	Q8VE65	Q8VE65 [40-60]	1	2648.42	21	0	0.851	0.952	0.705	-0.23	-0.07	-0.5	0.364247	0.725614	0.198048	0.921043	0.99264	0.724955	20.85	14.98	42.5	7.58796	7.38198	7.99435	0.675	1.016		0.851
336	High	Unambiguous	QTSKGEDVGYVASEITMSDEER	[R].QTSKGEDVGYVASEITMSDEER.[I]	1xOxidation [M17]; 1xTMT6plex [K4]; 1xTMT6plex [N-Term]; 1xPhospho [S3(91.4)]	1xOxidation [M17]; 1xTMT6plex [K4]; 1xTMT6plex [N-Term]; 1xPhospho [T2(8.6); S3(91.4); Y10(0); S13(0); T16(0); S18(0)]	P59808 1xPhospho [S163(91.4)]	P59808 1xPhospho [T162(8.6); S163(91.4); Y170(0); S173(0); T176(0); S178(0)]	0.000134965	0	1.519	1	1	6	P59808	P59808	SAM and SH3 domain-containing protein 1 OS=Mus musculus OX=10090 GN=Sash1 PE=1 SV=1	Sash1	Sash1_S163	YES	P59808	P59808 [161-182]	1	2985.38	22	0	0.816	1.013	1.002	-0.29	0.02	0	0.276277	0.858919	0.936197	0.852611	0.996046	0.999462	4.11	2	11.68	6.94486	6.54844	7.54226	0.816	0.935		0.782
3454	High	Unambiguous	IACDEEFSDSEDEGEGGRR	[R].IACDEEFSDSEDEGEGGRR.[N]	1xCarbamidomethyl [C3]; 1xTMT6plex [N-Term]; 2xPhospho [S8(100); S10(100)]	1xCarbamidomethyl [C3]; 1xTMT6plex [N-Term]; 2xPhospho [S8(100); S10(100)]	P70288 2xPhospho [S422(100); S424(100)]	P70288 2xPhospho [S422(100); S424(100)]	0.0013903	0.000404169	1.045	1	1	6	P70288	P70288	Histone deacetylase 2 OS=Mus musculus OX=10090 GN=Hdac2 PE=1 SV=1	Hdac2	Hdac2_S422;S424	YES	P70288	P70288 [415-433]	1	2546.96	19	0	0.942	0.966	0.924	-0.09	-0.05	-0.11	0.666977	0.936939	0.680686	0.98968	0.997187	0.998116	10	7.53	11.73	8.33666	7.63147	8.61619	0.827	0.978	1.05		0.908
1553	High	Unambiguous	SESGSKSSQPLASK	[M].SESGSKSSQPLASK.[Q]	1xAcetyl [N-Term]; 2xTMT6plex [K6; K14]; 1xTMT6plex [N-Term]; 1xPhospho [S8(84.2)]	1xAcetyl [N-Term]; 2xTMT6plex [K6; K14]; 1xTMT6plex [N-Term]; 1xPhospho [S1(0); S3(0); S5(7.9); S7(7.9); S8(84.2); S13(0)]	P17095 1xAcetyl [N-Term]; 1xPhospho [S9(84.2)]	P17095 1xAcetyl [N-Term]; 1xPhospho [S2(0); S4(0); S6(7.9); S8(7.9); S9(84.2); S14(0)]	0.000471198	0	1.268	1	1	20	P17095	P17095	High mobility group protein HMG-I/HMG-Y OS=Mus musculus OX=10090 GN=Hmga1 PE=1 SV=4	Hmga1	Hmga1_S9	YES	P17095	P17095 [2-15]	1	2202.16	14	0	0.508	0.883	0.872	-0.98	-0.18	-0.2	1.93e-06	0.344282	0.459852	9.14e-05	0.919766	0.978537	1	40.57	41.89	9.64818	9.56434	9.58402	0.382	0.515	0.495	0.574	0.508
2553	High	Unambiguous	ALTPDSASSGANPESQEDAETPAKEDSDVK	[R].ALTPDSASSGANPESQEDAETPAKEDSDVK.[S]	2xTMT6plex [K24; K30]; 1xTMT6plex [N-Term]; 1xPhospho [S6(81.5)]	2xTMT6plex [K24; K30]; 1xTMT6plex [N-Term]; 1xPhospho [T3(9.3); S6(81.5); S8(9.3); S9(0); S15(0); T21(0); S27(0)]	Q8K124 1xPhospho [S236(81.5)]	Q8K124 1xPhospho [T233(9.3); S236(81.5); S238(9.3); S239(0); S245(0); T251(0); S257(0)]	6.93e-08	0	3.02	1	1	11	Q8K124	Q8K124	Pleckstrin homology domain-containing family O member 2 OS=Mus musculus OX=10090 GN=Plekho2 PE=1 SV=1	Plekho2	Plekho2_S236	YES	Q8K124	Q8K124 [231-260]	1	3813.82	30	0	0.702	0.586	0.784	-0.51	-0.77	-0.35	0.0405731	0.00217417	0.365447	0.317913	0.0572126	0.928086	7.61	12.68	14.09	6.77879	6.4162	7.01836	0.495	0.742		0.808	0.664
392	High	Unambiguous	NSSSPVSPASVPGQR	[R].NSSSPVSPASVPGQR.[R]	1xTMT6plex [N-Term]; 1xPhospho [S4(91.8)]	1xTMT6plex [N-Term]; 1xPhospho [S2(0.1); S3(7.5); S4(91.8); S7(0.7); S10(0)]	Q8K3X4 1xPhospho [S638(91.8)]	Q8K3X4 1xPhospho [S636(0.1); S637(7.5); S638(91.8); S641(0.7); S644(0)]	2.41e-07	0	2.773	1	1	5	Q8K3X4	Q8K3X4	Interferon regulatory factor 2-binding protein-like OS=Mus musculus OX=10090 GN=Irf2bpl PE=1 SV=1	Irf2bpl	Irf2bpl_S638	YES	Q8K3X4	Q8K3X4 [635-649]	0	1778.86	15	0	0.855	0.999	0.677	-0.23	0	-0.56	0.393526	0.991557	0.14534	0.944049	0.999874	0.613674	6.01	12.3	11.03	7.59304	7.24916	7.97399	1.191	0.893	0.82		0.798
918	High	Unambiguous	KVEEEQEADEEDVSEEEAEDREGASK	[K].KVEEEQEADEEDVSEEEAEDREGASK.[A]	2xTMT6plex [K1; K26]; 1xTMT6plex [N-Term]; 1xPhospho [S14(100)]	2xTMT6plex [K1; K26]; 1xTMT6plex [N-Term]; 1xPhospho [S14(100); S25(0)]	Q8VBT0 1xPhospho [S245(100)]	Q8VBT0 1xPhospho [S245(100); S256(0)]	6.94e-10	0	3.932	1	1	15	Q8VBT0	Q8VBT0	Thioredoxin-related transmembrane protein 1 OS=Mus musculus OX=10090 GN=Tmx1 PE=1 SV=1	Tmx1	Tmx1_S245	YES	Q8VBT0	Q8VBT0 [232-257]	2	3733.71	26	0	0.993	1.138	1.091	-0.01	0.19	0.13	0.906069	0.248709	0.805044	0.999853	0.853713	0.998116	20.95	22.56	19.21	10.1376	10.0717	10.3209	0.798	1.212		1.082	0.911
2748	High	Unambiguous	ASSLNENVDHSALLK	[R].ASSLNENVDHSALLK.[L]	1xTMT6plex [K15]; 1xTMT6plex [N-Term]; 1xPhospho [S]	1xTMT6plex [K15]; 1xTMT6plex [N-Term]; 1xPhospho [S2(50); S3(50); S11(0)]	Q6R891 1xPhospho [S]	Q6R891 1xPhospho [S99(50); S100(50); S108(0)]	8.02e-06	0	2.079	1	1	12	Q6R891	Q6R891	Neurabin-2 OS=Mus musculus OX=10090 GN=Ppp1r9b PE=1 SV=1	Ppp1r9b	Ppp1r9b_S99	YES	Q6R891	Q6R891 [98-112]	0	2136.11	15	0	0.87	1.246	0.979	-0.2	0.32	-0.03	0.339882	0.0899166	0.797484	0.903354	0.606038	0.998116	12.8	22.42	6.4	9.45861	8.51215	9.57251	0.721	0.87	0.771	0.904	1.216
2610	High	Unambiguous	DAPFFRESPVGR	[R].DAPFFRESPVGR.[K]	1xTMT6plex [N-Term]; 1xPhospho [S8(100)]	1xTMT6plex [N-Term]; 1xPhospho [S8(100)]	Q8K2H1 1xPhospho [S147(100)]	Q8K2H1 1xPhospho [S147(100)]	0.000326874	0	1.342	1	1	6	Q8K2H1	Q8K2H1	Periphilin-1 OS=Mus musculus OX=10090 GN=Pphln1 PE=1 SV=1	Pphln1	Pphln1_S147	YES	Q8K2H1	Q8K2H1 [140-151]	1	1686.82	12	0	0.913	1.271	1.19	-0.13	0.35	0.25	0.553009	0.0735117	0.61652	0.98968	0.560444	0.996923	17.11	21.93	20.46	8.9858	8.60297	8.92954	0.779	1.032	0.807		1.276
365	High	Unambiguous	QAQSSTEIPLQAESGQGTEEEAAKDGEENREK	[K].QAQSSTEIPLQAESGQGTEEEAAKDGEENREK.[E]	2xTMT6plex [K24; K32]; 1xTMT6plex [N-Term]; 1xPhospho [S/T]	2xTMT6plex [K24; K32]; 1xTMT6plex [N-Term]; 1xPhospho [S4(6.8); S5(46.6); T6(46.6); S14(0); T18(0)]	Q9WTQ5 1xPhospho [S/T]	Q9WTQ5 1xPhospho [S234(6.8); S235(46.6); T236(46.6); S244(0); T248(0)]	0.000654163	0	1.201	1	1	9	Q9WTQ5	Q9WTQ5	A-kinase anchor protein 12 OS=Mus musculus OX=10090 GN=Akap12 PE=1 SV=1	Akap12	Akap12_[S235/T236]	YES	Q9WTQ5	Q9WTQ5 [231-262]	2	4214.03	32	0	0.908	1.231	1.568	-0.14	0.3	0.65	0.601873	0.118235	0.149021	0.98968	0.681044	0.622367	16.31	24.4	37.22	7.93748	7.1695	7.42742	0.575		0.844	1.081	0.976
2649	High	Unambiguous	APLVGSPVHLGPSQPLK	[K].APLVGSPVHLGPSQPLK.[F]	1xTMT6plex [K17]; 1xTMT6plex [N-Term]; 1xPhospho [S6(100)]	1xTMT6plex [K17]; 1xTMT6plex [N-Term]; 1xPhospho [S6(100); S13(0)]	Q6P5H2 1xPhospho [S1837(100)]	Q6P5H2 1xPhospho [S1837(100); S1844(0)]	7.16e-05	0	1.645	1	1	8	Q6P5H2	Q6P5H2	Nestin OS=Mus musculus OX=10090 GN=Nes PE=1 SV=1	Nes	Nes_S1837	YES	Q6P5H2	Q6P5H2 [1832-1848]	0	2235.27	17	0	0.933	0.725	1.405	-0.1	-0.46	0.49	0.622792	0.0128939	0.280321	0.98968	0.203332	0.85382	11.31	6.05	60.48	8.63081	9.40897	8.70632	0.835	1.03	0.978	0.851	0.933
1331	High	Unambiguous	VDDDSLGEFPVSNSR	[R].VDDDSLGEFPVSNSR.[A]	1xTMT6plex [N-Term]; 1xPhospho [S5(100)]	1xTMT6plex [N-Term]; 1xPhospho [S5(100); S12(0); S14(0)]	Q61103 1xPhospho [S142(100)]	Q61103 1xPhospho [S142(100); S149(0); S151(0)]	4.16e-05	0	1.753	1	1	7	Q61103	Q61103	Zinc finger protein ubi-d4 OS=Mus musculus OX=10090 GN=Dpf2 PE=1 SV=1	Dpf2	Dpf2_S142	YES	Q61103	Q61103 [138-152]	0	1945.87	15	0	0.878	0.917	0.702	-0.19	-0.12	-0.51	0.483759	0.600241	0.197173	0.9775	0.983853	0.723491	23.1	16.16	1.97	7.45615	7.06178	7.76487	0.858	1.287	0.878	0.657	1.055
1328	High	Unambiguous	VDNARVSPEVGSADVASIAQK	[K].VDNARVSPEVGSADVASIAQK.[E]	1xTMT6plex [K21]; 1xTMT6plex [N-Term]; 1xPhospho [S7(100)]	1xTMT6plex [K21]; 1xTMT6plex [N-Term]; 1xPhospho [S7(100); S12(0); S17(0)]	Q6PGL7 1xPhospho [S747(100)]	Q6PGL7 1xPhospho [S747(100); S752(0); S757(0)]	1.84e-08	0	3.283	1	1	9	Q6PGL7	Q6PGL7	WASH complex subunit 2 OS=Mus musculus OX=10090 GN=Washc2 PE=1 SV=1	Washc2	Washc2_S747	YES	Q6PGL7	Q6PGL7 [741-761]	1	2651.38	21	0	0.881	0.94	0.841	-0.18	-0.09	-0.25	0.374923	0.713587	0.440994	0.928885	0.99264	0.968496	16.76	6.71	31.66	8.80445	8.30469	9.16239	0.68	1.193	1.009	0.82	0.881
1927	High	Unambiguous	SNSNSSSVITTEDNK	[R].SNSNSSSVITTEDNK.[I]	1xTMT6plex [K15]; 1xTMT6plex [N-Term]; 1xPhospho [S/T]	1xTMT6plex [K15]; 1xTMT6plex [N-Term]; 1xPhospho [S1(2.6); S3(2.6); S5(46.1); S6(2.6); S7(46.1); T10(0); T11(0)]	Q6P6L0 1xPhospho [S/T]	Q6P6L0 1xPhospho [S1045(2.6); S1047(2.6); S1049(46.1); S1050(2.6); S1051(46.1); T1054(0); T1055(0)]	4.49e-06	0	2.194	1	1	25	Q6P6L0	Q6P6L0	Filamin A-interacting protein 1-like OS=Mus musculus OX=10090 GN=Filip1l PE=1 SV=2	Filip1l	Filip1l_S1047	YES	Q6P6L0	Q6P6L0 [1045-1059]	0	2121.01	15	0	0.852	1.042	1.086	-0.23	0.06	0.12	0.275165	0.764153	0.85767	0.85056	0.99264	0.998116	17.32	15.45	44.59	9.5714	8.76415	9.6173	0.495	0.965	0.751		1.012
283	High	Unambiguous	RAQSTDSLGTSSSLQSK	[R].RAQSTDSLGTSSSLQSK.[A]	1xTMT6plex [K17]; 1xTMT6plex [N-Term]; 1xPhospho [S4(100)]	1xTMT6plex [K17]; 1xTMT6plex [N-Term]; 1xPhospho [S4(100); T5(0); S7(0); T10(0); S11(0); S12(0); S13(0); S16(0)]	O35551 1xPhospho [S407(100)]	O35551 1xPhospho [S407(100); T408(0); S410(0); T413(0); S414(0); S415(0); S416(0); S419(0)]	2.32e-08	0	3.237	1	1	6	O35551	O35551	Rab GTPase-binding effector protein 1 OS=Mus musculus OX=10090 GN=Rabep1 PE=1 SV=2	Rabep1	Rabep1_S407	YES	O35551	O35551 [404-420]	1	2291.16	17	0	0.901	0.937	0.99	-0.15	-0.09	-0.01	0.48031	0.618953	0.859315	0.975117	0.991801	0.998116	15.27	6.7	21.7	8.75821	8.11499	8.84917	0.536		0.823	0.987	1.044
36	High	Unambiguous	MKSSSSVTTSEAHPSTPCSSDDSDLER	[R].MKSSSSVTTSEAHPSTPCSSDDSDLER.[V]	1xCarbamidomethyl [C18]; 1xTMT6plex [K2]; 1xTMT6plex [N-Term]; 1xPhospho [S3(97.7)]	1xCarbamidomethyl [C18]; 1xTMT6plex [K2]; 1xTMT6plex [N-Term]; 1xPhospho [S3(97.7); S4(2); S5(0.3); S6(0); T8(0); T9(0); S10(0); S15(0); T16(0); S19(0); S20(0); S23(0)]	P70460 1xPhospho [S317(97.7)]	P70460 1xPhospho [S317(97.7); S318(2); S319(0.3); S320(0); T322(0); T323(0); S324(0); S329(0); T330(0); S333(0); S334(0); S337(0)]	0.000198563	0	1.442	1	1	6	P70460	P70460	Vasodilator-stimulated phosphoprotein OS=Mus musculus OX=10090 GN=Vasp PE=1 SV=4	Vasp	Vasp_S317	YES	P70460	P70460 [315-341]	1	3436.53	27	0	1.175	1.328	0.873	0.23	0.41	-0.2	0.291445	0.0671987	0.499764	0.871306	0.534051	0.984677	13.36	5.48	35.55	8.43893	7.81543	8.81358	1.305		1.009	1.257	1.098
891	High	Unambiguous	KTSLDVSNSVEPGFLAPGAR	[R].KTSLDVSNSVEPGFLAPGAR.[S]	1xTMT6plex [K1]; 1xTMT6plex [N-Term]; 1xPhospho [S3(92.8)]	1xTMT6plex [K1]; 1xTMT6plex [N-Term]; 1xPhospho [T2(7.2); S3(92.8); S7(0); S9(0)]	Q8CH77 1xPhospho [S651(92.8)]	Q8CH77 1xPhospho [T650(7.2); S651(92.8); S655(0); S657(0)]	1.29e-05	0	1.985	1	1	13	Q8CH77	Q8CH77	Neuron navigator 1 OS=Mus musculus OX=10090 GN=Nav1 PE=1 SV=2	Nav1	Nav1_S651	YES	Q8CH77	Q8CH77 [649-668]	1	2583.36	20	0	0.628	1.077	0.905	-0.67	0.11	-0.14	0.00359298	0.587474	0.721394	0.05473	0.983139	0.998116	7.39	36.11	30.48	7.73268	6.52669	7.72315	0.465	0.707	0.628	0.606	0.769
1358	High	Unambiguous	TTSSPTQELQSPFLAK	[K].TTSSPTQELQSPFLAK.[R]	1xTMT6plex [K16]; 1xTMT6plex [N-Term]; 1xPhospho [S4(88.5)]	1xTMT6plex [K16]; 1xTMT6plex [N-Term]; 1xPhospho [T1(0.4); T2(0.4); S3(5.4); S4(88.5); T6(5.4); S11(0)]	Q62394 1xPhospho [S66(88.5)]	Q62394 1xPhospho [T63(0.4); T64(0.4); S65(5.4); S66(88.5); T68(5.4); S73(0)]	0.000350374	0	1.328	1	1	18	Q62394	Q62394	Zinc finger protein 185 OS=Mus musculus OX=10090 GN=Znf185 PE=1 SV=1	Znf185	Znf185_[T64/S65]	YES	Q62394	Q62394 [63-78]	0	2273.18	16	0	0.808	0.947	1.062	-0.31	-0.08	0.09	0.258115	0.817395	0.780728	0.837359	0.994856	0.998116	9.4	2.7	5.88	6.48704	5.48864	6.39403	0.808	0.932			0.73
1383	High	Unambiguous	VKPPPSPTTEGPSLQPDLAPEEAAGTQRPK	[K].VKPPPSPTTEGPSLQPDLAPEEAAGTQRPK.[N]	2xTMT6plex [K2; K30]; 1xTMT6plex [N-Term]; 1xPhospho [S6(86.3)]	2xTMT6plex [K2; K30]; 1xTMT6plex [N-Term]; 1xPhospho [S6(86.3); T8(13.3); T9(0.4); S13(0); T26(0)]	O54931 1xPhospho [S799(86.3)]	O54931 1xPhospho [S799(86.3); T801(13.3); T802(0.4); S806(0); T819(0)]	2.26e-05	0	1.874	1	1	11	O54931	O54931	A-kinase anchor protein 2 OS=Mus musculus OX=10090 GN=Akap2 PE=1 SV=3	Akap2	Akap2_[S799/T801]	YES	O54931	O54931 [794-823]	0	3863.06	30	0	0.73	0.796	0.837	-0.45	-0.33	-0.26	0.054622	0.120279	0.478971	0.382303	0.684991	0.984677	4.95	17.56	15.78	7.29106	6.89898	7.11455	0.663		0.755	0.868	0.706
267	High	Unambiguous	QPASLHGSTELLPLSR	[R].QPASLHGSTELLPLSR.[N]	1xTMT6plex [N-Term]; 1xPhospho [S8(99.7)]	1xTMT6plex [N-Term]; 1xPhospho [S4(0); S8(99.7); T9(0.3); S15(0)]	Q91WG2 1xPhospho [S180(99.7)]	Q91WG2 1xPhospho [S176(0); S180(99.7); T181(0.3); S187(0)]	6.49e-07	0	2.577	1	1	7	Q91WG2	Q91WG2	Rab GTPase-binding effector protein 2 OS=Mus musculus OX=10090 GN=Rabep2 PE=1 SV=3	Rabep2	Rabep2_S180	YES	Q91WG2	Q91WG2 [173-188]	0	2015.05	16	0	0.837	1.026	1.177	-0.26	0.04	0.23	0.294703	0.815338	0.633137	0.872629	0.994856	0.997562	10.61	11.33	16.37	8.16088	7.1819	8.53138	0.752	0.837	0.805	0.972	0.942
35	High	Unambiguous	MEDIDQSSLVSSSADSPPRPPPAFK	[-].MEDIDQSSLVSSSADSPPRPPPAFK.[Y]	1xAcetyl [N-Term]; 1xOxidation [M1]; 1xTMT6plex [K25]; 1xTMT6plex [N-Term]; 1xPhospho [S16(100)]	1xAcetyl [N-Term]; 1xOxidation [M1]; 1xTMT6plex [K25]; 1xTMT6plex [N-Term]; 1xPhospho [S7(0); S8(0); S11(0); S12(0); S13(0); S16(100)]	Q99P72 1xAcetyl [N-Term]; 1xPhospho [S16(100)]	Q99P72 1xAcetyl [N-Term]; 1xPhospho [S7(0); S8(0); S11(0); S12(0); S13(0); S16(100)]	1.17e-09	0	3.829	1	1	30	Q99P72	Q99P72	Reticulon-4 OS=Mus musculus OX=10090 GN=Rtn4 PE=1 SV=2	Rtn4	Rtn4_S16	YES	Q99P72	Q99P72 [1-25]	0	3254.57	25	0	0.878	0.971	1.106	-0.19	-0.04	0.15	0.341268	0.870813	0.840097	0.904271	0.996046	0.998116	18.8	10.04	7.93	8.35535	8	8.25597	0.641	0.878	1.138	1.023	0.868
1566	High	Unambiguous	RNSEIDELK	[R].RNSEIDELK.[S]	1xTMT6plex [K9]; 1xTMT6plex [N-Term]; 1xPhospho [S3(100)]	1xTMT6plex [K9]; 1xTMT6plex [N-Term]; 1xPhospho [S3(100)]	P48725 1xPhospho [S1437(100)]	P48725 1xPhospho [S1437(100)]	0.000459745	0	1.273	1	1	5	P48725	P48725	Pericentrin OS=Mus musculus OX=10090 GN=Pcnt PE=1 SV=2	Pcnt	Pcnt_S1437	YES	P48725	P48725 [1435-1443]	1	1641.86	9	0	0.809	1.05	0.931	-0.31	0.07	-0.1	0.130005	0.737602	0.65225	0.637527	0.99264	0.998116	6.71	36.34	16.48	8.78534	8.05905	8.67273	0.674	0.803	0.814		0.915
470	High	Unambiguous	KASPEPEGETAGK	[R].KASPEPEGETAGK.[M]	2xTMT6plex [K1; K13]; 1xTMT6plex [N-Term]; 1xPhospho [S3(100)]	2xTMT6plex [K1; K13]; 1xTMT6plex [N-Term]; 1xPhospho [S3(100); T10(0)]	Q8R3Y8 1xPhospho [S384(100)]	Q8R3Y8 1xPhospho [S384(100); T391(0)]	4.87e-06	0	2.178	1	1	5	Q8R3Y8	Q8R3Y8	Interferon regulatory factor 2-binding protein 1 OS=Mus musculus OX=10090 GN=Irf2bp1 PE=1 SV=2	Irf2bp1	Irf2bp1_S384	YES	Q8R3Y8	Q8R3Y8 [382-394]	1	2068.09	13	0	1.021	0.929	1.094	0.03	-0.11	0.13	0.909084	0.579322	0.797551	0.999853	0.983139	0.998116	20.06	21.85	7.83	9.7211	9.74231	10.0325	1.234	1.226	0.895	1.021	0.883
749	High	Unambiguous	LLTAAELLLDYDTGSEEAEEGAESSQEPVAHTVSEPK	[K].LLTAAELLLDYDTGSEEAEEGAESSQEPVAHTVSEPK.[V]	1xTMT6plex [K37]; 1xTMT6plex [N-Term]; 2xPhospho [T13(98.4); S15(100)]	1xTMT6plex [K37]; 1xTMT6plex [N-Term]; 2xPhospho [T3(0); Y11(1.6); T13(98.4); S15(100); S24(0); S25(0); T32(0); S34(0)]	Q8K352 2xPhospho [T318(98.4); S320(100)]	Q8K352 2xPhospho [T308(0); Y316(1.6); T318(98.4); S320(100); S329(0); S330(0); T337(0); S339(0)]	6.08e-10	0	3.958	1	1	19	Q8K352	Q8K352	SAM and SH3 domain-containing protein 3 OS=Mus musculus OX=10090 GN=Sash3 PE=1 SV=2	Sash3	Sash3_S320;T318	YES	Q8K352	Q8K352 [306-342]	0	4534.11	37	0	0.88	0.942	1.255	-0.18	-0.09	0.33	0.452239	0.82123	0.457565	0.96922	0.994856	0.977946	2.1	6.8	39.75	7.39575	5.77347	7.38802	0.901	0.864	0.864	0.88	0.982
47	High	Unambiguous	NMPSLSAATLASLGGTSSR	[R].NMPSLSAATLASLGGTSSR.[R]	1xOxidation [M2]; 1xTMT6plex [N-Term]; 1xPhospho [S18(93.7)]	1xOxidation [M2]; 1xTMT6plex [N-Term]; 1xPhospho [S4(0); S6(0); T9(0); S12(0); T16(0); S17(6.3); S18(93.7)]	Q3UZ39 1xPhospho [S84(93.7)]	Q3UZ39 1xPhospho [S70(0); S72(0); T75(0); S78(0); T82(0); S83(6.3); S84(93.7)]	2.62e-06	0	2.301	1	1	4	Q3UZ39	Q3UZ39	Leucine-rich repeat flightless-interacting protein 1 OS=Mus musculus OX=10090 GN=Lrrfip1 PE=1 SV=2	Lrrfip1	Lrrfip1_S84	YES	Q3UZ39	Q3UZ39 [67-85]	0	2146.04	19	0	0.831	1.042	0.589	-0.27	0.06	-0.76	0.461921	0.836132	0.0725819	0.972882	0.995193	0.408058	15.28	17.28	5.05	4.76022	4.32193	5.53916			0.707	0.831	1.01
5350	High	Unambiguous	LDSVDGPGRSPGR	[R].LDSVDGPGRSPGR.[Q]	1xTMT6plex [N-Term]; 1xPhospho [S10(100)]	1xTMT6plex [N-Term]; 1xPhospho [S3(0); S10(100)]	Q5SSZ5 1xPhospho [S752(100)]	Q5SSZ5 1xPhospho [S745(0); S752(100)]	0.0229588	0.00227667	0.487	1	1	4	Q5SSZ5	Q5SSZ5	Tensin-3 OS=Mus musculus OX=10090 GN=Tns3 PE=1 SV=1	Tns3	Tns3_S752	YES	Q5SSZ5	Q5SSZ5 [743-755]	1	1621.79	13	0	0.763	0.91	0.724	-0.39	-0.14	-0.47	0.0975435	0.640825	0.228511	0.545569	0.99264	0.771616	3.64	21.78	24.31	8.17742	7.52042	8.51215	0.763		0.731	0.898
1329	High	Unambiguous	VDIITEEMPENALPSDEDDKDPNDPYR	[R].VDIITEEMPENALPSDEDDKDPNDPYR.[A]	1xOxidation [M8]; 1xTMT6plex [K20]; 1xTMT6plex [N-Term]; 1xPhospho [S15(100)]	1xOxidation [M8]; 1xTMT6plex [K20]; 1xTMT6plex [N-Term]; 1xPhospho [T5(0); S15(100); Y26(0)]	O54774 1xPhospho [S784(100)]	O54774 1xPhospho [T774(0); S784(100); Y795(0)]	2.21e-05	0	1.878	1	1	6	O54774	O54774	AP-3 complex subunit delta-1 OS=Mus musculus OX=10090 GN=Ap3d1 PE=1 SV=1	Ap3d1	Ap3d1_S784	YES	O54774	O54774 [770-796]	1	3671.67	27	0	0.68	0.9	0.786	-0.56	-0.15	-0.35	0.0298259	0.586319	0.319943	0.258248	0.983139	0.893874	2.16	9.1	21.7	7.03232	6.39403	7.21237	0.668	0.658	1.092	0.68	0.733
1476	High	Unambiguous	RVSAILPGAPDNELPSNEVFQEPEEK	[R].RVSAILPGAPDNELPSNEVFQEPEEK.[K]	1xTMT6plex [K26]; 1xTMT6plex [N-Term]; 1xPhospho [S3(100)]	1xTMT6plex [K26]; 1xTMT6plex [N-Term]; 1xPhospho [S3(100); S16(0)]	Q3UW53 1xPhospho [S601(100)]	Q3UW53 1xPhospho [S601(100); S614(0)]	4.16e-05	0	1.753	1	1	10	Q3UW53	Q3UW53	Protein Niban OS=Mus musculus OX=10090 GN=Fam129a PE=1 SV=2	Fam129a	Fam129a_S601	YES	Q3UW53	Q3UW53 [599-624]	1	3403.72	26	0	0.775	1.131	0.953	-0.37	0.18	-0.07	0.0768148	0.403435	0.717396	0.47392	0.940545	0.998116	7.07	21.09	56.78	8.57327	7.72383	8.75255	0.646	0.713	0.775	0.786	0.855
330	High	Unambiguous	QVPVMQGAGMQGASMQGGSQPGGFSPGQSQVTPQDHEK	[R].QVPVMQGAGMQGASMQGGSQPGGFSPGQSQVTPQDHEK.[A]	3xOxidation [M5; M10; M15]; 1xTMT6plex [K38]; 1xTMT6plex [N-Term]; 1xPhospho [S25(99.7)]	3xOxidation [M5; M10; M15]; 1xTMT6plex [K38]; 1xTMT6plex [N-Term]; 1xPhospho [S14(0); S19(0.3); S25(99.7); S29(0); T32(0)]	Q8BIQ5 1xPhospho [S527(99.7)]	Q8BIQ5 1xPhospho [S516(0); S521(0.3); S527(99.7); S531(0); T534(0)]	1.8e-08	0	3.287	1	1	6	Q8BIQ5	Q8BIQ5	Cleavage stimulation factor subunit 2 OS=Mus musculus OX=10090 GN=Cstf2 PE=1 SV=2	Cstf2	Cstf2_S527	YES	Q8BIQ5	Q8BIQ5 [503-540]	0	4412.01	38	0	1.087	0.797	1.289	0.12	-0.33	0.37	0.44885	0.103814	0.316873	0.968069	0.651066	0.88942	3.49	11.27	5.15	7.0045	7.15886	7.10643	1.087	0.752		1.112
3311	High	Unambiguous	HKSDSPESDTEREK	[R].HKSDSPESDTEREK.[D]	2xTMT6plex [K2; K14]; 1xTMT6plex [N-Term]; 3xPhospho [S3(100); S5(100); S8(100)]	2xTMT6plex [K2; K14]; 1xTMT6plex [N-Term]; 3xPhospho [S3(100); S5(100); S8(100); T10(0)]	Q9R1C7 3xPhospho [S879(100); S881(100); S884(100)]	Q9R1C7 3xPhospho [S879(100); S881(100); S884(100); T886(0)]	0.00112514	0.000209709	1.089	1	1	9	Q9R1C7	Q9R1C7	Pre-mRNA-processing factor 40 homolog A OS=Mus musculus OX=10090 GN=Prpf40a PE=1 SV=1	Prpf40a	Prpf40a_S879;S881;S884	YES	Q9R1C7	Q9R1C7 [877-890]	2	2572.13	14	0	0.81	0.918	0.744	-0.3	-0.12	-0.43	0.127285	0.523081	0.155629	0.629467	0.971331	0.636008	2.01	0.61	30.45	10.1584	9.65875	10.517	0.748		0.81	0.827
1858	High	Unambiguous	SKSEEAHAEDSVMDHHFR	[K].SKSEEAHAEDSVMDHHFR.[K]	1xTMT6plex [K2]; 1xTMT6plex [N-Term]; 1xPhospho [S]	1xTMT6plex [K2]; 1xTMT6plex [N-Term]; 1xPhospho [S1(50); S3(50); S11(0)]	Q9CY58 1xPhospho [S]	Q9CY58 1xPhospho [S327(50); S329(50); S337(0)]	6.89e-06	0	2.109	1	1	8	Q9CY58	Q9CY58	Plasminogen activator inhibitor 1 RNA-binding protein OS=Mus musculus OX=10090 GN=Serbp1 PE=1 SV=2	Serbp1	Serbp1_[S327/S329]	NO	Q9CY58	Q9CY58 [327-344]	1	2650.21	18	0	1.017	1.066	2.273	0.02	0.09	1.18	0.892181	0.650815	0.0062569	0.999182	0.99264	0.0646509	6.39	24.61	42.28	9.00506	9.03617	8.94837	1.017		0.899	1.061
1531	High	Unambiguous	SEGESQTVVSSGSDPK	[M].SEGESQTVVSSGSDPK.[V]	1xAcetyl [N-Term]; 1xTMT6plex [K16]; 1xTMT6plex [N-Term]; 1xPhospho [S1(100)]	1xAcetyl [N-Term]; 1xTMT6plex [K16]; 1xTMT6plex [N-Term]; 1xPhospho [S1(100); S5(0); T7(0); S10(0); S11(0); S13(0)]	Q99J45 1xAcetyl [N-Term]; 1xPhospho [S2(100)]	Q99J45 1xAcetyl [N-Term]; 1xPhospho [S2(100); S6(0); T8(0); S11(0); S12(0); S14(0)]	5.12e-06	0	2.168	1	1	6	Q99J45	Q99J45	Nuclear receptor-binding protein OS=Mus musculus OX=10090 GN=Nrbp1 PE=1 SV=1	Nrbp1	Nrbp1_S2	YES	Q99J45	Q99J45 [2-17]	0	2174.03	16	0	1.048	1.029	0.681	0.07	0.04	-0.55	0.628064	0.782765	0.137193	0.98968	0.994547	0.595578	11.05	12.1	24.04	7.41475	6.99325	7.91739	1.112	0.941	1.139		0.987
4181	High	Unambiguous	RGSFEAGR	[R].RGSFEAGR.[R]	1xTMT6plex [N-Term]; 1xPhospho [S3(100)]	1xTMT6plex [N-Term]; 1xPhospho [S3(100)]	Q99M08 1xPhospho [S19(100)]	Q99M08 1xPhospho [S19(100)]	0.00370532	0.000677187	0.841	1	1	3	Q99M08	Q99M08	Uncharacterized protein C4orf3 homolog OS=Mus musculus OX=10090 PE=1 SV=1	Q99M08	Q99M08_S19	NO	Q99M08	Q99M08 [17-24]	1	1188.57	8	0	1.196	1.105	1.005	0.26	0.14	0.01	0.33352	0.650824	0.975639	0.900166	0.99264	0.999899	1.61	12.33	4.82	4.60288	4.3505	5.04876	0.733	1.196	1.209
1487	High	Unambiguous	SAGSSSPEAGEDSDHEDGNYCPPVKR	[R].SAGSSSPEAGEDSDHEDGNYCPPVKR.[E]	1xCarbamidomethyl [C21]; 1xTMT6plex [K25]; 1xTMT6plex [N-Term]; 2xPhospho [S6(89.3); S13(100)]	1xCarbamidomethyl [C21]; 1xTMT6plex [K25]; 1xTMT6plex [N-Term]; 2xPhospho [S1(0); S4(1.1); S5(9.7); S6(89.3); S13(100); Y20(0)]	Q9CT10 2xPhospho [S33(89.3); S40(100)]	Q9CT10 2xPhospho [S28(0); S31(1.1); S32(9.7); S33(89.3); S40(100); Y47(0)]	7.4e-06	0	2.095	1	1	12	Q9CT10	Q9CT10	Ran-binding protein 3 OS=Mus musculus OX=10090 GN=Ranbp3 PE=1 SV=2	Ranbp3	Ranbp3_S40;S33	YES	Q9CT10	Q9CT10 [28-53]	1	3366.4	26	0	0.946	0.863	1.103	-0.08	-0.21	0.14	0.701472	0.285704	0.802091	0.98968	0.889162	0.998116	13.88	4.52	39.85	9.29117	8.59432	9.21723	0.481	0.965	1.045	0.946	0.8
2713	High	Unambiguous	ASPSPQPSSQPLQINR	[R].ASPSPQPSSQPLQINR.[Q]	1xTMT6plex [N-Term]; 1xPhospho [S4(99.3)]	1xTMT6plex [N-Term]; 1xPhospho [S2(0.7); S4(99.3); S8(0); S9(0)]	Q3UMY5 1xPhospho [S146(99.3)]	Q3UMY5 1xPhospho [S144(0.7); S146(99.3); S150(0); S151(0)]	0.00035916	0	1.323	1	1	8	Q3UMY5	Q3UMY5	Echinoderm microtubule-associated protein-like 4 OS=Mus musculus OX=10090 GN=Eml4 PE=1 SV=1	Eml4	Eml4_S146	YES	Q3UMY5	Q3UMY5 [143-158]	0	2016.01	16	0	0.968	1.046	0.998	-0.05	0.06	0	0.989328	0.656892	0.963678	0.99999	0.99264	0.999899	5.66	25.19	11.24	7.47249	7.13545	7.66107	0.89	0.968	0.998	1.135	0.929
4641	High	Unambiguous	GSSTPTK	[K].GSSTPTK.[G]	1xTMT6plex [K7]; 1xTMT6plex [N-Term]; 1xPhospho [S/T]	1xTMT6plex [K7]; 1xTMT6plex [N-Term]; 1xPhospho [S2(0.3); S3(49.7); T4(49.7); T6(0.3)]	Q58A65 1xPhospho [S/T]	Q58A65 1xPhospho [S363(0.3); S364(49.7); T365(49.7); T367(0.3)]	0.00804993	0.000907142	0.685	1	1	3	Q58A65	Q58A65	C-Jun-amino-terminal kinase-interacting protein 4 OS=Mus musculus OX=10090 GN=Spag9 PE=1 SV=2	Spag9	Spag9_S364	YES	Q58A65	Q58A65 [362-368]	0	1215.64	7	0	0.905	0.935	0.608	-0.14	-0.1	-0.72	0.509	0.619272	0.0216892	0.979989	0.991801	0.172999	0.64	21.19	20.81	9.84627	9.70977	10.6854	0.9	1.02	0.905
2528	High	Unambiguous	AEDGAAPSPSSETPKK	[K].AEDGAAPSPSSETPKK.[K]	2xTMT6plex [K15; K16]; 1xTMT6plex [N-Term]; 1xPhospho [T13(93.2)]	2xTMT6plex [K15; K16]; 1xTMT6plex [N-Term]; 1xPhospho [S8(0); S10(0.5); S11(6.4); T13(93.2)]	P26645 1xPhospho [T143(93.2)]	P26645 1xPhospho [S138(0); S140(0.5); S141(6.4); T143(93.2)]	0.00045524	0	1.275	1	1	7	P26645	P26645	Myristoylated alanine-rich C-kinase substrate OS=Mus musculus OX=10090 GN=Marcks PE=1 SV=2	Marcks	Marcks_T143	YES	P26645	P26645 [131-146]	1	2339.21	16	0	0.858	1.374	0.905	-0.22	0.46	-0.14	0.25753	0.011561	0.567596	0.837294	0.187767	0.996923	2.62	14.63	16.07	10.1196	9.63951	9.95225	0.845		0.83	0.871	1.026
704	High	Unambiguous	LEFQQQLGEAPGDASP	[R].LEFQQQLGEAPGDASP.[-]	1xTMT6plex [N-Term]; 1xPhospho [S15(100)]	1xTMT6plex [N-Term]; 1xPhospho [S15(100)]	P58686 1xPhospho [S82(100)]	P58686 1xPhospho [S82(100)]	0.000181451	0	1.46	1	1	7	P58686	P58686	UPF0184 protein C9orf16 homolog OS=Mus musculus OX=10090 PE=3 SV=1	P58686	P58686_S82	YES	P58686	P58686 [68-83]	0	1995.93	16	0	0.767	0.947	1.123	-0.38	-0.08	0.17	0.218995	0.82651	0.6645	0.795691	0.994856	0.998116	15.29	5.34	15.83	5.69381	5.49522	5.65289	0.532	0.941	0.862	0.683
523	High	Unambiguous	KLLLDPSSTPTK	[R].KLLLDPSSTPTK.[A]	2xTMT6plex [K1; K12]; 1xTMT6plex [N-Term]; 1xPhospho [T9(99.7)]	2xTMT6plex [K1; K12]; 1xTMT6plex [N-Term]; 1xPhospho [S7(0); S8(0.2); T9(99.7); T11(0.2)]	Q9CQ22 1xPhospho [T28(99.7)]	Q9CQ22 1xPhospho [S26(0); S27(0.2); T28(99.7); T30(0.2)]	2.52e-05	0	1.852	1	1	6	Q9CQ22	Q9CQ22	Ragulator complex protein LAMTOR1 OS=Mus musculus OX=10090 GN=Lamtor1 PE=1 SV=1	Lamtor1	Lamtor1_T28	YES	Q9CQ22	Q9CQ22 [20-31]	1	2067.21	12	0	0.775	1.254	1.102	-0.37	0.33	0.14	0.139409	0.0870486	0.768195	0.660594	0.601506	0.998116	14.54	12.99	20.36	7.86165	7.444	7.93659	0.661	0.91	0.657	1.419
3207	High	Unambiguous	RAPSPGSYK	[K].RAPSPGSYK.[T]	1xTMT6plex [K9]; 1xTMT6plex [N-Term]; 1xPhospho [S4(100)]	1xTMT6plex [K9]; 1xTMT6plex [N-Term]; 1xPhospho [S4(100); S7(0); Y8(0)]	O35126 1xPhospho [S630(100)]	O35126 1xPhospho [S630(100); S633(0); Y634(0)]	0.00122108	0.000209709	1.072	1	1	6	O35126	O35126	Atrophin-1 OS=Mus musculus OX=10090 GN=Atn1 PE=1 SV=1	Atn1	Atn1_S630	YES	O35126	O35126 [627-635]	1	1500.8	9	0	0.998	1.061	1.114	0	0.09	0.16	0.994399	0.694853	0.765574	0.99999	0.99264	0.998116	5.37	8.61	40.92	9.30539	8.97517	9.20233	0.94	1.033	0.964	1.035
410	High	Unambiguous	QKSDAEEDGVTGSQDEEDSKPK	[K].QKSDAEEDGVTGSQDEEDSKPK.[A]	3xTMT6plex [K2; K20; K22]; 1xTMT6plex [N-Term]; 1xPhospho [T/S]	3xTMT6plex [K2; K20; K22]; 1xTMT6plex [N-Term]; 1xPhospho [S3(0); T11(50); S13(50); S19(0)]	P35564 1xPhospho [T/S]	P35564 1xPhospho [S553(0); T561(50); S563(50); S569(0)]	1.27e-05	0	1.988	1	1	12	P35564	P35564	Calnexin OS=Mus musculus OX=10090 GN=Canx PE=1 SV=1	Canx	Canx_[T561/S563]	YES	P35564	P35564 [551-572]	1	3375.66	22	0	0.947	1.064	0.857	-0.08	0.09	-0.22	0.734785	0.656551	0.435529	0.995916	0.99264	0.967404	7.56	33.99	14.92	9.56224	9.03012	9.72383	0.947	0.929	1.07	0.894	1.006
1001	High	Unambiguous	TQTPPLGQTPQLGLK	[R].TQTPPLGQTPQLGLK.[T]	1xTMT6plex [K15]; 1xTMT6plex [N-Term]; 1xPhospho [T3(99.8)]	1xTMT6plex [K15]; 1xTMT6plex [N-Term]; 1xPhospho [T1(0.2); T3(99.8); T9(0)]	Q62448 1xPhospho [T507(99.8)]	Q62448 1xPhospho [T505(0.2); T507(99.8); T513(0)]	4.57e-05	0	1.734	1	1	8	Q62448	Q62448	Eukaryotic translation initiation factor 4 gamma 2 OS=Mus musculus OX=10090 GN=Eif4g2 PE=1 SV=2	Eif4g2	Eif4g2_T507	YES	Q62448	Q62448 [505-519]	0	2117.18	15	0	0.881	0.859	0.832	-0.18	-0.22	-0.27	0.499268	0.377673	0.497114	0.979638	0.931641	0.984677	6.93	9.01	8.25	7.57061	6.72656	7.73809	0.934	0.759	0.905	0.716	0.881
116	High	Unambiguous	LQRPKEESSEDENEVSNILR	[R].LQRPKEESSEDENEVSNILR.[S]	1xTMT6plex [K5]; 1xTMT6plex [N-Term]; 2xPhospho [S8(100); S9(100)]	1xTMT6plex [K5]; 1xTMT6plex [N-Term]; 2xPhospho [S8(100); S9(100); S16(0)]	B2RRE7 2xPhospho [S1016(100); S1017(100)]	B2RRE7 2xPhospho [S1016(100); S1017(100); S1024(0)]	0.000527556	0	1.245	1	1	5	B2RRE7	B2RRE7	OTU domain-containing protein 4 OS=Mus musculus OX=10090 GN=Otud4 PE=1 SV=1	Otud4	Otud4_S1016;S1017	NO	B2RRE7	B2RRE7 [1009-1028]	1	2990.43	20	0	0.893	0.943	1.049	-0.16	-0.08	0.07	0.447223	0.647231	0.940805	0.968069	0.99264	0.999899	15.94	24.8	9.13	9.5795	9.60529	9.79961	0.617		1.013	0.893
1221	High	Unambiguous	VPLLFSDEEDSEVPSGVKPEDLK	[K].VPLLFSDEEDSEVPSGVKPEDLK.[V]	2xTMT6plex [K18; K23]; 1xTMT6plex [N-Term]; 1xPhospho [S6(100)]	2xTMT6plex [K18; K23]; 1xTMT6plex [N-Term]; 1xPhospho [S6(100); S11(0); S15(0)]	Q6PGL7 1xPhospho [S723(100)]	Q6PGL7 1xPhospho [S723(100); S728(0); S732(0)]	1.52e-05	0	1.953	1	1	9	Q6PGL7	Q6PGL7	WASH complex subunit 2 OS=Mus musculus OX=10090 GN=Washc2 PE=1 SV=1	Washc2	Washc2_S723	YES	Q6PGL7	Q6PGL7 [718-740]	0	3296.72	23	0	0.929	1.203	1.149	-0.11	0.27	0.2	0.632202	0.154215	0.740567	0.98968	0.753496	0.998116	10.18	16.4	27.86	8.9655	8.61324	8.30561	0.929	1.194	0.899	0.855	1.03
4607	High	Unambiguous	DIDLFGSDEEEEDKEAAR	[K].DIDLFGSDEEEEDKEAAR.[L]	1xTMT6plex [K14]; 1xTMT6plex [N-Term]; 1xPhospho [S7(100)]	1xTMT6plex [K14]; 1xTMT6plex [N-Term]; 1xPhospho [S7(100)]	P57776 1xPhospho [S162(100)]	P57776 1xPhospho [S162(100)]	0.00554071	0.000907142	0.759	1	1	4	P57776	P57776	Elongation factor 1-delta OS=Mus musculus OX=10090 GN=Eef1d PE=1 SV=3	Eef1d	Eef1d_S162	NO	P57776	P57776 [156-173]	1	2606.19	18	0	0.714	0.84	0.734	-0.49	-0.25	-0.45	0.046436	0.313548	0.164542	0.34706	0.899368	0.658947	5.5	45.28	1.49	7.80607	7.50064	8.30058	1.012	0.714	0.662
4699	High	Unambiguous	RNSQEVK	[R].RNSQEVK.[A]	1xTMT6plex [K7]; 1xTMT6plex [N-Term]; 1xPhospho [S3(100)]	1xTMT6plex [K7]; 1xTMT6plex [N-Term]; 1xPhospho [S3(100)]	Q8VBT6 1xPhospho [S520(100)]	Q8VBT6 1xPhospho [S520(100)]	0.00757061	0.000907142	0.697	1	1	11	Q8VBT6	Q8VBT6	Apolipoprotein B receptor OS=Mus musculus OX=10090 GN=Apobr PE=1 SV=1	Apobr	Apobr_S520	YES	Q8VBT6	Q8VBT6 [518-524]	1	1398.75	7	0	0.906	1.007	0.905	-0.14	0.01	-0.14	0.452861	0.932738	0.569229	0.96922	0.997187	0.996923	5.86	15.6	33.16	11.0026	10.2251	10.9834	0.848	0.95	0.935	0.831	0.906
1160	High	Unambiguous	SVSASHEGDVK	[R].SVSASHEGDVK.[E]	1xTMT6plex [K11]; 1xTMT6plex [N-Term]; 1xPhospho [S1(95.6)]	1xTMT6plex [K11]; 1xTMT6plex [N-Term]; 1xPhospho [S1(95.6); S3(4.4); S5(0)]	Q3U9G9 1xPhospho [S101(95.6)]	Q3U9G9 1xPhospho [S101(95.6); S103(4.4); S105(0)]	3.59e-06	0	2.238	1	1	11	Q3U9G9	Q3U9G9	Lamin-B receptor OS=Mus musculus OX=10090 GN=Lbr PE=1 SV=2	Lbr	Lbr_S101	YES	Q3U9G9	Q3U9G9 [101-111]	0	1653.82	11	0	1.021	1.189	1.163	0.03	0.25	0.22	0.942106	0.169697	0.601658	0.99999	0.774696	0.996923	18.78	15.27	12.46	10.5951	9.64404	10.2261	1.191	0.938	0.822	1.021	1.15
2787	High	Unambiguous	FIIGSVSEDNSEDEISNLVK	[R].FIIGSVSEDNSEDEISNLVK.[L]	1xTMT6plex [K20]; 1xTMT6plex [N-Term]; 1xPhospho [S11(100)]	1xTMT6plex [K20]; 1xTMT6plex [N-Term]; 1xPhospho [S5(0); S7(0); S11(100); S16(0)]	Q5SWU9 1xPhospho [S29(100)]	Q5SWU9 1xPhospho [S23(0); S25(0); S29(100); S34(0)]	1.78e-05	0	1.921	1	1	4	Q5SWU9	Q5SWU9	Acetyl-CoA carboxylase 1 OS=Mus musculus OX=10090 GN=Acaca PE=1 SV=1	Acaca	Acaca_S29	YES	Q5SWU9	Q5SWU9 [19-38]	0	2733.36	20	0	0.881	0.975	0.619	-0.18	-0.04	-0.69	0.619713	0.909983	0.0594496	0.98968	0.997187	0.358502	3.1	24.01	7.56	5.46923	5.52669	6.08108	0.857	0.881		0.918
5605	High	Unambiguous	GPSSVEDIK	[K].GPSSVEDIK.[A]	1xTMT6plex [K9]; 1xTMT6plex [N-Term]; 1xPhospho [S4(99.8)]	1xTMT6plex [K9]; 1xTMT6plex [N-Term]; 1xPhospho [S3(0.3); S4(99.8)]	Q61937 1xPhospho [S241(99.8)]	Q61937 1xPhospho [S240(0.3); S241(99.8)]	0.0282144	0.00285375	0.449	1	1	7	Q61937	Q61937	Nucleophosmin OS=Mus musculus OX=10090 GN=Npm1 PE=1 SV=1	Npm1	Npm1_S241	YES	Q61937	Q61937 [238-246]	0	1469.77	9	0	0.823	0.813	1.493	-0.28	-0.3	0.58	0.162846	0.0741124	0.128864	0.705747	0.561148	0.575519	6.35	6.46	52.88	10.0439	10.0188	9.49229	0.859	0.969	0.755		0.788
1269	High	Unambiguous	YVDEDNSDGETVDHR	[K].YVDEDNSDGETVDHR.[L]	1xTMT6plex [N-Term]; 1xPhospho [S7(100)]	1xTMT6plex [N-Term]; 1xPhospho [Y1(0); S7(100); T11(0)]	Q8VDQ9 1xPhospho [S142(100)]	Q8VDQ9 1xPhospho [Y136(0); S142(100); T146(0)]	1.69e-07	0	2.844	1	1	12	Q8VDQ9	Q8VDQ9	Protein KRI1 homolog OS=Mus musculus OX=10090 GN=Kri1 PE=1 SV=3	Kri1	Kri1_S142	YES	Q8VDQ9	Q8VDQ9 [136-150]	0	2059.84	15	0	0.915	0.954	1.247	-0.13	-0.07	0.32	0.495233	0.718209	0.408262	0.979638	0.99264	0.953366	16.13	9.87	27.69	10.4242	9.92083	10.6144	0.799	1.139	0.808		1.036
307	High	Unambiguous	RDSSEGPPGSEGDGGGQSKPSSGGGVDK	[R].RDSSEGPPGSEGDGGGQSKPSSGGGVDK.[A]	2xTMT6plex [K19; K28]; 1xTMT6plex [N-Term]; 1xPhospho [S3(89.9)]	2xTMT6plex [K19; K28]; 1xTMT6plex [N-Term]; 1xPhospho [S3(89.9); S4(10.1); S10(0); S18(0); S21(0); S22(0)]	Q8VDU5 1xPhospho [S569(89.9)]	Q8VDU5 1xPhospho [S569(89.9); S570(10.1); S576(0); S584(0); S587(0); S588(0)]	4.18e-08	0	3.12	1	1	9	Q8VDU5	Q8VDU5	SNF-related serine/threonine-protein kinase OS=Mus musculus OX=10090 GN=Snrk PE=1 SV=1	Snrk	Snrk_S569	YES	Q8VDU5	Q8VDU5 [567-594]	1	3355.6	28	0	0.807	0.963	0.635	-0.31	-0.05	-0.66	0.132088	0.83865	0.0834843	0.64318	0.995193	0.444509	6.73	9.92	22.98	8.85639	8.31733	8.97086	0.733		1.053	0.77	0.846
2494	High	Unambiguous	AAAAGLGHPSSPGGSEDGPPISGDEDTAR	[R].AAAAGLGHPSSPGGSEDGPPISGDEDTAR.[E]	1xTMT6plex [N-Term]; 1xPhospho [S/T]	1xTMT6plex [N-Term]; 1xPhospho [S10(50); S11(50); S15(0); S22(0); T27(0)]	Q62431 1xPhospho [S/T]	Q62431 1xPhospho [S77(50); S78(50); S82(0); S89(0); T94(0)]	3.4e-11	0	4.529	1	1	11	Q62431	Q62431	AT-rich interactive domain-containing protein 3A OS=Mus musculus OX=10090 GN=Arid3a PE=1 SV=1	Arid3a	Arid3a_[S77/S78]	YES	Q62431	Q62431 [68-96]	0	2985.34	29	0	1.078	1.055	1.182	0.11	0.08	0.24	0.606479	0.757567	0.613351	0.98968	0.99264	0.996923	14.37	14.8	27.08	8.22207	8.09064	8.16189	1.183	1.078	1	1.188	0.965
574	High	Unambiguous	GVQAGNSDTEGGQPGR	[K].GVQAGNSDTEGGQPGR.[K]	1xTMT6plex [N-Term]; 1xPhospho [S/T]	1xTMT6plex [N-Term]; 1xPhospho [S7(50); T9(50)]	Q9JIX8 1xPhospho [S/T]	Q9JIX8 1xPhospho [S838(50); T840(50)]	1.5e-06	0	2.411	1	1	10	Q9JIX8	Q9JIX8	Apoptotic chromatin condensation inducer in the nucleus OS=Mus musculus OX=10090 GN=Acin1 PE=1 SV=3	Acin1	Acin1_[S838/T840]	YES	Q9JIX8	Q9JIX8 [832-847]	0	1838.82	16	0	0.887	0.977	1.15	-0.17	-0.03	0.2	0.3814	0.95037	0.725466	0.934769	0.997227	0.998116	13.05	3.07	38.89	8.35186	7.83827	8.44463	0.953	0.825	0.716		1.019
1882	High	Unambiguous	SLDAEPSVPSAAKPSSPEK	[K].SLDAEPSVPSAAKPSSPEK.[T]	2xTMT6plex [K13; K19]; 1xTMT6plex [N-Term]; 1xPhospho [S16(92.3)]	2xTMT6plex [K13; K19]; 1xTMT6plex [N-Term]; 1xPhospho [S1(0); S7(0); S10(0); S15(7.7); S16(92.3)]	Q8BZH4 1xPhospho [S422(92.3)]	Q8BZH4 1xPhospho [S407(0); S413(0); S416(0); S421(7.7); S422(92.3)]	0.000437647	0	1.283	1	1	8	Q8BZH4	Q8BZH4	Pogo transposable element with ZNF domain OS=Mus musculus OX=10090 GN=Pogz PE=1 SV=2	Pogz	Pogz_S422	YES	Q8BZH4	Q8BZH4 [407-425]	0	2664.41	19	0	0.777	0.803	0.844	-0.36	-0.32	-0.24	0.0894058	0.1975	0.445435	0.520348	0.802781	0.970969	6.77	6.5	37.64	8.56181	7.68844	8.42399	0.715	0.725	0.863		0.832
121	High	Unambiguous	LNSQESDEEPQISDVPHISK	[R].LNSQESDEEPQISDVPHISK.[G]	1xTMT6plex [K20]; 1xTMT6plex [N-Term]; 2xPhospho [S3(100); S6(100)]	1xTMT6plex [K20]; 1xTMT6plex [N-Term]; 2xPhospho [S3(100); S6(100); S13(0); S19(0)]	Q9QXZ0 2xPhospho [S3082(100); S3085(100)]	Q9QXZ0 2xPhospho [S3082(100); S3085(100); S3092(0); S3098(0)]	1.87e-05	0	1.911	1	1	7	Q9QXZ0	Q9QXZ0	Microtubule-actin cross-linking factor 1 OS=Mus musculus OX=10090 GN=Macf1 PE=1 SV=2	Macf1	Macf1_S3082;S3085	YES	Q9QXZ0	Q9QXZ0 [3080-3099]	0	2870.33	20	0	0.89	0.848	1.039	-0.17	-0.24	0.05	0.378296	0.3053	0.973939	0.932718	0.897259	0.999899	4.07	6.02	13.14	8.43129	8.04821	8.50144	0.813	0.89	0.904	0.859	1.069
1232	High	Unambiguous	VMHTQCHSTPDSAEDVRK	[R].VMHTQCHSTPDSAEDVRK.[L]	1xCarbamidomethyl [C6]; 1xOxidation [M2]; 1xTMT6plex [K18]; 1xTMT6plex [N-Term]; 1xPhospho [S12(100)]	1xCarbamidomethyl [C6]; 1xOxidation [M2]; 1xTMT6plex [K18]; 1xTMT6plex [N-Term]; 1xPhospho [T4(0); S8(0); T9(0.1); S12(100)]	P29699 1xPhospho [S138(100)]	P29699 1xPhospho [T130(0); S134(0); T135(0.1); S138(100)]	6.17e-06	0	2.131	1	1	43	P29699	P29699	Alpha-2-HS-glycoprotein OS=Mus musculus OX=10090 GN=Ahsg PE=1 SV=1	Ahsg	Ahsg_S138	YES	P29699	P29699 [127-144]	1	2652.23	18	0	0.776	1.198	0.865	-0.37	0.26	-0.21	0.0684374	0.110765	0.445989	0.440816	0.664322	0.970969	4.5	30.89	23.42	11.7435	11.1704	11.5003	0.466	0.781	0.737	0.776	1.046
535	High	Unambiguous	KFELLPTPPLSPSR	[K].KFELLPTPPLSPSR.[RA]	1xTMT6plex [K1]; 1xTMT6plex [N-Term]; 1xPhospho [S/T]	1xTMT6plex [K1]; 1xTMT6plex [N-Term]; 1xPhospho [T7(0); S11(50); S13(50)]	P01108 1xPhospho [S/T]	P01108 1xPhospho [T58(0); S62(50); S64(50)]	0.000514772	0	1.25	1	2	6	P01108	P01108	Myc proto-oncogene protein OS=Mus musculus OX=10090 GN=Myc PE=1 SV=1	Myc	Myc_[S62/S64]	NO	P01108; P03966	P01108 [52-65]	1	2120.19	14	0	0.972	1.036	2.334	-0.04	0.05	1.22	0.987826	0.705843	0.00313527	0.99999	0.99264	0.0373383	20.73	10.51	121.32	7.48998	7.51303	7.4674	1.178	0.897	0.678	1.054
1062	High	Unambiguous	STEEQPLPTESPDALNDYSLPKPHEIENVDSR	[K].STEEQPLPTESPDALNDYSLPKPHEIENVDSR.[E]	1xTMT6plex [K22]; 1xTMT6plex [N-Term]; 1xPhospho [S31(100)]	1xTMT6plex [K22]; 1xTMT6plex [N-Term]; 1xPhospho [S1(0); T2(0); T9(0); S11(0); Y18(0); S19(0); S31(100)]	O08900 1xPhospho [S42(100)]	O08900 1xPhospho [S12(0); T13(0); T20(0); S22(0); Y29(0); S30(0); S42(100)]	0.000297436	0	1.361	1	1	6	O08900	O08900	Zinc finger protein Aiolos OS=Mus musculus OX=10090 GN=Ikzf3 PE=1 SV=2	Ikzf3	Ikzf3_S42	YES	O08900	O08900 [12-43]	0	4146	32	0	1.119	1.027	0.886	0.16	0.04	-0.17	0.370067	0.791442	0.592166	0.925899	0.994856	0.996923	13.07	2.36	5.44	7.20163	6.1127	7.45533	1.451	1.218	1.098	0.717	1.119
5356	High	Unambiguous	SQSPHYPMVK	[R].SQSPHYPMVK.[V]	1xOxidation [M8]; 1xTMT6plex [K10]; 1xTMT6plex [N-Term]; 1xPhospho [S3(99.6)]	1xOxidation [M8]; 1xTMT6plex [K10]; 1xTMT6plex [N-Term]; 1xPhospho [S1(0.4); S3(99.6); Y6(0)]	Q8BIZ6 1xPhospho [S91(99.6)]	Q8BIZ6 1xPhospho [S89(0.4); S91(99.6); Y94(0)]	0.0211707	0.00227667	0.502	1	1	9	Q8BIZ6	Q8BIZ6	Smad nuclear-interacting protein 1 OS=Mus musculus OX=10090 GN=Snip1 PE=1 SV=1	Snip1	Snip1_[S89/S91]	YES	Q8BIZ6	Q8BIZ6 [89-98]	0	1727.86	10	0	1.016	0.962	0.772	0.02	-0.06	-0.37	0.968303	0.807249	0.208857	0.99999	0.994856	0.743809	5.66	28	11.06	10.0689	9.35138	10.4294	0.746	1.055	1.016
5078	High	Unambiguous	KSSTSPK	[R].KSSTSPK.[W]	2xTMT6plex [K1; K7]; 1xTMT6plex [N-Term]; 1xPhospho [S5(96.1)]	2xTMT6plex [K1; K7]; 1xTMT6plex [N-Term]; 1xPhospho [S2(0); S3(0); T4(3.9); S5(96.1)]	Q569Z6 1xPhospho [S915(96.1)]	Q569Z6 1xPhospho [S912(0); S913(0); T914(3.9); S915(96.1)]	0.013644	0.00157079	0.584	1	1	6	Q569Z6	Q569Z6	Thyroid hormone receptor-associated protein 3 OS=Mus musculus OX=10090 GN=Thrap3 PE=1 SV=1	Thrap3	Thrap3_[S913/T914/S915]	YES	Q569Z6	Q569Z6 [911-917]	1	1501.86	7	0	0.725	0.912	1.009	-0.46	-0.13	0.01	0.0221398	0.439504	0.925718	0.211413	0.958593	0.999462	0.49	3.13	9.52	11.4604	10.7803	11.3776	0.721	0.977		0.725
3579	High	Unambiguous	HKMSPPPSSFNEPR	[R].HKMSPPPSSFNEPR.[S]	1xOxidation [M3]; 1xTMT6plex [K2]; 1xTMT6plex [N-Term]; 1xPhospho [S4(100)]	1xOxidation [M3]; 1xTMT6plex [K2]; 1xTMT6plex [N-Term]; 1xPhospho [S4(100); S8(0); S9(0)]	Q9CW46 1xPhospho [S626(100)]	Q9CW46 1xPhospho [S626(100); S630(0); S631(0)]	0.00206024	0.000530845	0.963	1	1	7	Q9CW46	Q9CW46	Ribonucleoprotein PTB-binding 1 OS=Mus musculus OX=10090 GN=Raver1 PE=1 SV=2	Raver1	Raver1_S626	YES	Q9CW46	Q9CW46 [623-636]	1	2165.06	14	0	0.92	0.977	1.064	-0.12	-0.03	0.09	0.664009	0.934082	0.964724	0.98968	0.997187	0.999899	2.28	7.91	24.18	8.14466	8.27519	8.69314	0.92	0.913	0.878	1.04	0.937
4663	High	Unambiguous	STSPDPDWSSQLER	[K].STSPDPDWSSQLER.[T]	1xTMT6plex [N-Term]; 1xPhospho [S3(97.8)]	1xTMT6plex [N-Term]; 1xPhospho [S1(1.1); T2(1.1); S3(97.8); S9(0); S10(0)]	Q91YE8 1xPhospho [S220(97.8)]	Q91YE8 1xPhospho [S218(1.1); T219(1.1); S220(97.8); S226(0); S227(0)]	0.00745568	0.000907142	0.7	1	1	5	Q91YE8	Q91YE8	Synaptopodin-2 OS=Mus musculus OX=10090 GN=Synpo2 PE=1 SV=2	Synpo2	Synpo2_[T219/S220]	YES	Q91YE8	Q91YE8 [218-231]	0	1913.85	14	0	0.877	1.102	0.667	-0.19	0.14	-0.58	0.472803	0.500055	0.0836594	0.974021	0.965376	0.444509	11.2	0.96	28.48	7.82845	6.82146	8.24031	0.748	0.963	0.877
1006	High	Unambiguous	TSSESIYSRPGSSIPGSPGHTIYAK	[R].TSSESIYSRPGSSIPGSPGHTIYAK.[V]	1xTMT6plex [K25]; 1xTMT6plex [N-Term]; 1xPhospho [S2(76.4)]	1xTMT6plex [K25]; 1xTMT6plex [N-Term]; 1xPhospho [T1(10.9); S2(76.4); S3(10.9); S5(1.7); Y7(0.1); S8(0); S12(0); S13(0); S17(0); T21(0); Y23(0)]	Q8K4G5 1xPhospho [S396(76.4)]	Q8K4G5 1xPhospho [T395(10.9); S396(76.4); S397(10.9); S399(1.7); Y401(0.1); S402(0); S406(0); S407(0); S411(0); T415(0); Y417(0)]	0.000554054	0	1.235	1	1	9	Q8K4G5	Q8K4G5	Actin-binding LIM protein 1 OS=Mus musculus OX=10090 GN=Ablim1 PE=1 SV=1	Ablim1	Ablim1_S396	YES	Q8K4G5	Q8K4G5 [395-419]	0	3117.57	25	0	1.017	0.95	0.999	0.02	-0.07	0	0.840827	0.85381	0.947993	0.999182	0.995606	0.999899	15.49	7.28	23.03	8.03435	7.59099	7.88617	0.956		0.868	1.081	1.188
2938	High	Unambiguous	FSHSYLSDSDTEAK	[R].FSHSYLSDSDTEAK.[L]	1xTMT6plex [K14]; 1xTMT6plex [N-Term]; 1xPhospho [S9(96.1)]	1xTMT6plex [K14]; 1xTMT6plex [N-Term]; 1xPhospho [S2(0); S4(0); Y5(0); S7(0); S9(96.1); T11(3.9)]	Q9JMH9 1xPhospho [S2039(96.1)]	Q9JMH9 1xPhospho [S2032(0); S2034(0); Y2035(0); S2037(0); S2039(96.1); T2041(3.9)]	5.69e-07	0	2.603	1	1	9	Q9JMH9	Q9JMH9	Unconventional myosin-XVIIIa OS=Mus musculus OX=10090 GN=Myo18a PE=1 SV=2	Myo18a	Myo18a_S2039	YES	Q9JMH9	Q9JMH9 [2031-2044]	0	2124.99	14	0	0.863	0.838	0.767	-0.21	-0.26	-0.38	0.325598	0.171358	0.249086	0.89884	0.77582	0.811881	4.21	4.55	12.67	9.10476	8.73487	9.16541	0.885	0.842	0.746		0.907
3353	High	Unambiguous	SASSDTSEELNSQDSPKR	[R].SASSDTSEELNSQDSPKR.[Q]	1xTMT6plex [K17]; 1xTMT6plex [N-Term]; 2xPhospho [S3(99.1); S15(100)]	1xTMT6plex [K17]; 1xTMT6plex [N-Term]; 2xPhospho [S1(0.1); S3(99.1); S4(0.8); T6(0); S7(0.1); S12(0); S15(100)]	P70441 2xPhospho [S285(99.1); S297(100)]	P70441 2xPhospho [S283(0.1); S285(99.1); S286(0.8); T288(0); S289(0.1); S294(0); S297(100)]	0.0013573	0.000404169	1.05	1	1	12	P70441	P70441	Na(+)/H(+) exchange regulatory cofactor NHE-RF1 OS=Mus musculus OX=10090 GN=Slc9a3r1 PE=1 SV=3	Slc9a3r1	Slc9a3r1_S297;[S283/S285/S286]	YES	P70441	P70441 [283-300]	1	2556.13	18	0	1.069	1.044	1.184	0.1	0.06	0.24	0.694714	0.688886	0.548044	0.98968	0.99264	0.996923	6.13	8.52	7.36	10.5001	10.4335	10.6451	1.113	1.102	0.853	0.981	1.069
2347	High	Unambiguous	ELLTSDSPPHNDIMSPVDPGVAQPNSR	[K].ELLTSDSPPHNDIMSPVDPGVAQPNSR.[V]	1xOxidation [M14]; 1xTMT6plex [N-Term]; 1xPhospho [S7(98.4)]	1xOxidation [M14]; 1xTMT6plex [N-Term]; 1xPhospho [T4(0.2); S5(1.4); S7(98.4); S15(0); S26(0)]	Q9R1E0 1xPhospho [S467(98.4)]	Q9R1E0 1xPhospho [T464(0.2); S465(1.4); S467(98.4); S475(0); S486(0)]	2.2e-05	0	1.879	1	1	10	Q9R1E0	Q9R1E0	Forkhead box protein O1 OS=Mus musculus OX=10090 GN=Foxo1 PE=1 SV=2	Foxo1	Foxo1_S467	NO	Q9R1E0	Q9R1E0 [461-487]	0	3198.5	27	0	0.787	0.855	1.102	-0.35	-0.23	0.14	0.142105	0.23747	0.679795	0.667797	0.847905	0.998116	13.04	1.4	8.63	7.46516	7.38716	7.67807	0.675	0.787		1.015
4466	High	Unambiguous	LQEKLSPPYSSPQEFAQDVGR	[R].LQEKLSPPYSSPQEFAQDVGR.[M]	1xTMT6plex [K4]; 1xTMT6plex [N-Term]; 1xPhospho [S6(99.9)]	1xTMT6plex [K4]; 1xTMT6plex [N-Term]; 1xPhospho [S6(99.9); Y9(0); S10(0); S11(0)]	Q62318 1xPhospho [S752(99.9)]	Q62318 1xPhospho [S752(99.9); Y755(0); S756(0); S757(0)]	0.00554071	0.000907142	0.759	1	1	3	Q62318	Q62318	Transcription intermediary factor 1-beta OS=Mus musculus OX=10090 GN=Trim28 PE=1 SV=3	Trim28	Trim28_S752	YES	Q62318	Q62318 [747-767]	1	2914.48	21	0	0.874	0.86	0.593	-0.2	-0.22	-0.75	0.427224	0.308804	0.0634927	0.960135	0.897259	0.373016	1.25	19.25	6.44	7.34961	6.92955	7.76089	0.51		0.874	0.883
1862	High	Unambiguous	SKPSSPVVSEKEFNLDDNIPEDDSGVLTPEDSGK	[K].SKPSSPVVSEKEFNLDDNIPEDDSGVLTPEDSGK.[S]	3xTMT6plex [K2; K11; K34]; 1xTMT6plex [N-Term]; 2xPhospho [S5(85.9); S9(85.9)]	3xTMT6plex [K2; K11; K34]; 1xTMT6plex [N-Term]; 2xPhospho [S1(1.5); S4(26.8); S5(85.9); S9(85.9); S24(0); T28(0); S32(0)]	Q8K352 2xPhospho [S38(85.9); S42(85.9)]	Q8K352 2xPhospho [S34(1.5); S37(26.8); S38(85.9); S42(85.9); S57(0); T61(0); S65(0)]	0.00030644	0	1.355	1	1	6	Q8K352	Q8K352	SAM and SH3 domain-containing protein 3 OS=Mus musculus OX=10090 GN=Sash3 PE=1 SV=2	Sash3	Sash3_S38;S42	YES	Q8K352	Q8K352 [34-67]	1	4708.3	34	0	0.689	0.873	0.907	-0.54	-0.2	-0.14	0.0272106	0.468273	0.721981	0.241903	0.964738	0.998116	4.21	12.86	47.64	8.13475	6.54103	7.82907	0.717	0.663	0.635		0.781
926	High	Unambiguous	TISSSPSIESLPGGR	[K].TISSSPSIESLPGGR.[E]	1xTMT6plex [N-Term]; 1xPhospho [S7(100)]	1xTMT6plex [N-Term]; 1xPhospho [T1(0); S3(0); S4(0); S5(0); S7(100); S10(0)]	Q80XQ2 1xPhospho [S565(100)]	Q80XQ2 1xPhospho [T559(0); S561(0); S562(0); S563(0); S565(100); S568(0)]	5.04e-06	0	2.171	1	1	6	Q80XQ2	Q80XQ2	TBC1 domain family member 5 OS=Mus musculus OX=10090 GN=Tbc1d5 PE=1 SV=2	Tbc1d5	Tbc1d5_S565	YES	Q80XQ2	Q80XQ2 [559-573]	0	1796.9	15	0	1.793	1.141	1.775	0.84	0.19	0.83	0.000122192	0.308127	0.0570286	0.00336515	0.897259	0.351153	17.91	10.84	9.13	7.04221	7.05528	7.44045	1.314	1.989	1.305	1.793	2.009
4974	High	Unambiguous	SQLSDSDDDYDDVDIPAPSENIPPPLPPKPK	[R].SQLSDSDDDYDDVDIPAPSENIPPPLPPKPK.[F]	2xTMT6plex [K29; K31]; 1xTMT6plex [N-Term]; 2xPhospho [S/Y]	2xTMT6plex [K29; K31]; 1xTMT6plex [N-Term]; 2xPhospho [S1(0.4); S4(66.5); S6(66.5); Y10(66.5); S19(0)]	P70218 2xPhospho [S/Y]	P70218 2xPhospho [S370(0.4); S373(66.5); S375(66.5); Y379(66.5); S388(0)]	0.0117667	0.00131309	0.612	1	1	7	P70218	P70218	Mitogen-activated protein kinase kinase kinase kinase 1 OS=Mus musculus OX=10090 GN=Map4k1 PE=1 SV=1	Map4k1	Map4k1_S370;[S375/Y379]	YES	P70218	P70218 [370-400]	0	4209.02	31	0	0.953	1.114	0.711	-0.07	0.16	-0.49	0.938451	0.544242	0.15689	0.99999	0.977655	0.63908	12.9	37.34	26.78	5.16993	5.50462	6.33271	0.953		0.862	1.353
26	High	Unambiguous	MEDSMDMDMSPLRPQNYLFGCELK	[-].MEDSMDMDMSPLRPQNYLFGCELK.[A]	1xAcetyl [N-Term]; 1xCarbamidomethyl [C21]; 3xOxidation [M]; 1xTMT6plex [K24]; 1xTMT6plex [N-Term]; 1xPhospho [S10(100)]	1xAcetyl [N-Term]; 1xCarbamidomethyl [C21]; 3xOxidation [M1; M5; M7; M9]; 1xTMT6plex [K24]; 1xTMT6plex [N-Term]; 1xPhospho [S4(0.1); S10(100); Y17(0)]	Q61937 1xAcetyl [N-Term]; 1xPhospho [S10(100)]	Q61937 1xAcetyl [N-Term]; 1xPhospho [S4(0.1); S10(100); Y17(0)]	6.91e-05	0	1.652	1	1	55	Q61937	Q61937	Nucleophosmin OS=Mus musculus OX=10090 GN=Npm1 PE=1 SV=1	Npm1	Npm1_S10	NO	Q61937	Q61937 [1-24]	0	3535.54	24	0	0.777	0.862	1.175	-0.36	-0.21	0.23	0.0742889	0.291951	0.636824	0.461709	0.894237	0.998116	7.43	21.81	70.75	8.84078	8.64854	8.60585	0.713	0.72	0.777	1.107	1.026
1119	High	Unambiguous	TDGKEEEEQPSTSATQSSPAPGQSK	[K].TDGKEEEEQPSTSATQSSPAPGQSK.[K]	2xTMT6plex [K4; K25]; 1xTMT6plex [N-Term]; 1xPhospho [S18(91.3)]	2xTMT6plex [K4; K25]; 1xTMT6plex [N-Term]; 1xPhospho [T1(0); S11(0); T12(0); S13(0); T15(0); S17(8.8); S18(91.3); S24(0)]	B2RWS6 1xPhospho [S1037(91.3)]	B2RWS6 1xPhospho [T1020(0); S1030(0); T1031(0); S1032(0); T1034(0); S1036(8.8); S1037(91.3); S1043(0)]	3.87e-05	0	1.767	1	1	5	B2RWS6	B2RWS6	Histone acetyltransferase p300 OS=Mus musculus OX=10090 GN=Ep300 PE=1 SV=2	Ep300	Ep300_S1037	YES	B2RWS6	B2RWS6 [1020-1044]	1	3343.61	25	0	1.036	0.968	0.797	0.05	-0.05	-0.33	0.708244	0.94043	0.394565	0.989834	0.997187	0.947458	2.01	39.59	18.67	6.15987	5.66391	6.87036	0.875		1.036		1.05
3279	High	Unambiguous	YSPTSPTYSPTTPK	[K].YSPTSPTYSPTTPK.[Y]	1xTMT6plex [K14]; 1xTMT6plex [N-Term]; 1xPhospho [Y1(100)]	1xTMT6plex [K14]; 1xTMT6plex [N-Term]; 1xPhospho [Y1(100); S2(0); T4(0); S5(0); T7(0); Y8(0); S9(0); T11(0); T12(0)]	P08775 1xPhospho [Y1874(100)]	P08775 1xPhospho [Y1874(100); S1875(0); T1877(0); S1878(0); T1880(0); Y1881(0); S1882(0); T1884(0); T1885(0)]	0.000814056	0.000209709	1.156	1	1	11	P08775	P08775	DNA-directed RNA polymerase II subunit RPB1 OS=Mus musculus OX=10090 GN=Polr2a PE=1 SV=3	Polr2a	Polr2a_Y1874	YES	P08775	P08775 [1874-1887]	0	2065.03	14	0	0.98	0.979	0.973	-0.03	-0.03	-0.04	0.820521	0.948146	0.76621	0.999052	0.997227	0.998116	24.56	12.8	11.89	8.45286	7.73335	8.68159	0.725	0.98	0.791	1.149	1.014
351	High	Unambiguous	NVPGLAAPSSPTQK	[R].NVPGLAAPSSPTQK.[E]	1xTMT6plex [K14]; 1xTMT6plex [N-Term]; 1xPhospho [S/T]	1xTMT6plex [K14]; 1xTMT6plex [N-Term]; 1xPhospho [S9(0.1); S10(50); T12(50)]	Q8R3Q2 1xPhospho [S/T]	Q8R3Q2 1xPhospho [S669(0.1); S670(50); T672(50)]	0.00063841	0	1.206	1	1	5	Q8R3Q2	Q8R3Q2	Serine/threonine-protein phosphatase 6 regulatory subunit 2 OS=Mus musculus OX=10090 GN=Ppp6r2 PE=1 SV=1	Ppp6r2	Ppp6r2_T672	YES	Q8R3Q2	Q8R3Q2 [661-674]	0	1905.02	14	0	0.907	1.081	0.968	-0.14	0.11	-0.05	0.609061	0.492999	0.82209	0.98968	0.965376	0.998116	1.41	21.74	7	7.92621	7.45782	8.09778	0.895	1.042		0.899	0.916
2595	High	Unambiguous	ATAQPIIEILDEQPSPSPR	[R].ATAQPIIEILDEQPSPSPR.[A]	1xTMT6plex [N-Term]; 1xPhospho [S15(100)]	1xTMT6plex [N-Term]; 1xPhospho [T2(0); S15(100); S17(0)]	Q8BVK9 1xPhospho [S175(100)]	Q8BVK9 1xPhospho [T162(0); S175(100); S177(0)]	7.59e-07	0	2.546	1	1	10	Q8BVK9	Q8BVK9	Sp110 nuclear body protein OS=Mus musculus OX=10090 GN=Sp110 PE=1 SV=1	Sp110	Sp110_S175	YES	Q8BVK9	Q8BVK9 [161-179]	0	2371.21	19	0	0.876	0.928	0.911	-0.19	-0.11	-0.13	0.493194	0.774743	0.758502	0.979638	0.99264	0.998116	15.87	1.58	25.71	6.59544	5.70598	6.67101	0.876	1.076	0.754	0.883	0.735
1912	High	Unambiguous	SKEPSSPGTDDVFTPGSSDSPSSQR	[R].SKEPSSPGTDDVFTPGSSDSPSSQR.[I]	1xTMT6plex [K2]; 1xTMT6plex [N-Term]; 1xPhospho [S20(92.2)]	1xTMT6plex [K2]; 1xTMT6plex [N-Term]; 1xPhospho [S1(0); S5(0); S6(0); T9(0); T14(0); S17(0); S18(0.1); S20(92.2); S22(7.2); S23(0.6)]	Q61165 1xPhospho [S790(92.2)]	Q61165 1xPhospho [S771(0); S775(0); S776(0); T779(0); T784(0); S787(0); S788(0.1); S790(92.2); S792(7.2); S793(0.6)]	3.35e-07	0	2.708	1	1	15	Q61165	Q61165	Sodium/hydrogen exchanger 1 OS=Mus musculus OX=10090 GN=Slc9a1 PE=1 SV=1	Slc9a1	Slc9a1_S790	YES	Q61165	Q61165 [771-795]	1	3090.43	25	0	1.015	0.958	0.777	0.02	-0.06	-0.36	0.88819	0.741413	0.282443	0.999182	0.99264	0.855076	3.22	2.18	32.81	8.88295	8.82655	9.13545	1.023	1.015	0.993	1.065	0.894
1774	High	Unambiguous	SPSPPPDGSPAATPEIR	[K].SPSPPPDGSPAATPEIR.[V]	1xTMT6plex [N-Term]; 1xPhospho [S3(100)]	1xTMT6plex [N-Term]; 1xPhospho [S1(0); S3(100); S9(0); T13(0)]	O08539 1xPhospho [S298(100)]	O08539 1xPhospho [S296(0); S298(100); S304(0); T308(0)]	2.74e-07	0	2.748	1	1	13	O08539	O08539	Myc box-dependent-interacting protein 1 OS=Mus musculus OX=10090 GN=Bin1 PE=1 SV=1	Bin1	Bin1_S298	YES	O08539	O08539 [296-312]	0	1984.96	17	0	0.999	1.107	1.217	0	0.15	0.28	0.970969	0.504073	0.569898	0.99999	0.967661	0.996923	8.04	4.6	9.73	8.81858	7.92303	8.87529	0.945	1.095	1.016	0.871	0.999
614	High	Unambiguous	HAFSPVASVESASGETLHSPK	[R].HAFSPVASVESASGETLHSPK.[V]	1xTMT6plex [K21]; 1xTMT6plex [N-Term]; 2xPhospho [S11(100); S13(100)]	1xTMT6plex [K21]; 1xTMT6plex [N-Term]; 2xPhospho [S4(0); S8(0); S11(100); S13(100); T16(0); S19(0)]	P29699 2xPhospho [S312(100); S314(100)]	P29699 2xPhospho [S305(0); S309(0); S312(100); S314(100); T317(0); S320(0)]	5.2e-07	0	2.621	1	1	30	P29699	P29699	Alpha-2-HS-glycoprotein OS=Mus musculus OX=10090 GN=Ahsg PE=1 SV=1	Ahsg	Ahsg_S309;S314	YES	P29699	P29699 [302-322]	0	2756.31	21	0	0.685	1.154	0.863	-0.55	0.21	-0.21	0.00727749	0.203	0.439198	0.0920402	0.809125	0.968064	5.26	23	14.4	10.1643	10.1088	10.1371	0.502	0.685	0.737	0.679	1.02
2385	High	Unambiguous	AESPETSAVESTQSTPQK	[R].AESPETSAVESTQSTPQK.[G]	1xTMT6plex [K18]; 1xTMT6plex [N-Term]; 1xPhospho [S3(99.7)]	1xTMT6plex [K18]; 1xTMT6plex [N-Term]; 1xPhospho [S3(99.7); T6(0.3); S7(0); S11(0); T12(0); S14(0); T15(0)]	Q4VA53 1xPhospho [S1356(99.7)]	Q4VA53 1xPhospho [S1356(99.7); T1359(0.3); S1360(0); S1364(0); T1365(0); S1367(0); T1368(0)]	2.03e-07	0	2.807	1	1	29	Q4VA53	Q4VA53	Sister chromatid cohesion protein PDS5 homolog B OS=Mus musculus OX=10090 GN=Pds5b PE=1 SV=1	Pds5b	Pds5b_S1356	YES	Q4VA53	Q4VA53 [1354-1371]	0	2415.17	18	0	0.821	0.854	0.767	-0.28	-0.23	-0.38	0.183364	0.255047	0.289527	0.74289	0.859301	0.859511	8.88	16.64	35.96	9.1179	8.87252	9.09645	0.687	0.944	0.894	0.768	0.821
5690	High	Unambiguous	RLNHSPPQSSSR	[R].RLNHSPPQSSSR.[Y]	1xTMT6plex [N-Term]; 1xPhospho [S5(100)]	1xTMT6plex [N-Term]; 1xPhospho [S5(100); S9(0); S10(0); S11(0)]	Q6NZN0 1xPhospho [S127(100)]	Q6NZN0 1xPhospho [S127(100); S131(0); S132(0); S133(0)]	0.03216	0.00334229	0.425	1	1	3	Q6NZN0	Q6NZN0	RNA-binding protein 26 OS=Mus musculus OX=10090 GN=Rbm26 PE=1 SV=2	Rbm26	Rbm26_S127	YES	Q6NZN0	Q6NZN0 [123-134]	1	1674.83	12	0	0.832	0.979	0.76	-0.27	-0.03	-0.4	0.29974	0.969499	0.266103	0.877682	0.998927	0.83823	6.2	22.39	9.31	7.50779	6.46761	7.36282	0.782			0.832	0.995
1763	High	Unambiguous	SPGGPGPLTLK	[R].SPGGPGPLTLK.[E]	1xTMT6plex [K11]; 1xTMT6plex [N-Term]; 1xPhospho [S1(100)]	1xTMT6plex [K11]; 1xTMT6plex [N-Term]; 1xPhospho [S1(100); T9(0)]	Q62523 1xPhospho [S336(100)]	Q62523 1xPhospho [S336(100); T344(0)]	0.000466584	0	1.27	1	1	6	Q62523	Q62523	Zyxin OS=Mus musculus OX=10090 GN=Zyx PE=1 SV=2	Zyx	Zyx_S336	YES	Q62523	Q62523 [336-346]	0	1561.88	11	0	0.853	0.82	0.811	-0.23	-0.29	-0.3	0.325262	0.235066	0.378021	0.89884	0.845167	0.937469	9.5	17.73	5.77	8.26397	7.95826	8.17742	0.628	0.953	0.853	0.838	0.928
3939	High	Unambiguous	QGFPDRESPVSDLTSTGLYQDKQEEK	[K].QGFPDRESPVSDLTSTGLYQDKQEEK.[S]	2xTMT6plex [K22; K26]; 1xTMT6plex [N-Term]; 1xPhospho [S8(100)]	2xTMT6plex [K22; K26]; 1xTMT6plex [N-Term]; 1xPhospho [S8(100); S11(0); T14(0); S15(0); T16(0); Y19(0)]	P14873 1xPhospho [S1438(100)]	P14873 1xPhospho [S1438(100); S1441(0); T1444(0); S1445(0); T1446(0); Y1449(0)]	0.00204059	0.000530845	0.965	1	1	7	P14873	P14873	Microtubule-associated protein 1B OS=Mus musculus OX=10090 GN=Map1b PE=1 SV=2	Map1b	Map1b_S1438	YES	P14873	P14873 [1431-1456]	2	3721.86	26	0	0.898	1.018	1.047	-0.16	0.03	0.07	0.467655	0.809245	0.963464	0.974021	0.994856	0.999899	2.79	8.91	32.81	8.29967	7.62717	8.55574	0.483	1.065	0.898	0.909	0.877
2830	High	Unambiguous	FPRSPEEDQQAFRPLEK	[R].FPRSPEEDQQAFRPLEK.[E]	1xTMT6plex [K17]; 1xTMT6plex [N-Term]; 1xPhospho [S4(100)]	1xTMT6plex [K17]; 1xTMT6plex [N-Term]; 1xPhospho [S4(100)]	Q6P5H2 1xPhospho [S688(100)]	Q6P5H2 1xPhospho [S688(100)]	0.000208748	0	1.432	1	1	6	Q6P5H2	Q6P5H2	Nestin OS=Mus musculus OX=10090 GN=Nes PE=1 SV=1	Nes	Nes_S688	YES	Q6P5H2	Q6P5H2 [685-701]	1	2612.33	17	0	0.893	0.653	1.925	-0.16	-0.62	0.94	0.432739	0.0010426	0.0204141	0.963206	0.033438	0.166235	1.24	4.06	117.79	8.58594	9.65819	8.33459	0.857	0.908	0.889		0.896
4279	High	Unambiguous	ASSEGAEQSKR	[R].ASSEGAEQSKR.[A]	1xTMT6plex [K10]; 1xTMT6plex [N-Term]; 1xPhospho [S3(93.7)]	1xTMT6plex [K10]; 1xTMT6plex [N-Term]; 1xPhospho [S2(6.3); S3(93.7); S9(0)]	D3Z6Q9 1xPhospho [S]	D3Z6Q9 1xPhospho [S391(50); S392(50); S398(0)]	0.00537805	0.000818925	0.765	1	1	9	D3Z6Q9	D3Z6Q9	Bridging integrator 2 OS=Mus musculus OX=10090 GN=Bin2 PE=1 SV=1	Bin2	Bin2_[S391/S392]	NO	D3Z6Q9	D3Z6Q9 [390-400]	1	1687.84	11	0	0.875	0.928	0.844	-0.19	-0.11	-0.24	0.322713	0.533276	0.384915	0.897857	0.972745	0.941055	20.55	33.67	41.3	11.2167	10.5751	11.0549	0.369	0.875	1.039	0.717	0.884
803	High	Unambiguous	KQPSPAPTPSTPTGAACLDR	[R].KQPSPAPTPSTPTGAACLDR.[S]	1xCarbamidomethyl [C17]; 1xTMT6plex [K1]; 1xTMT6plex [N-Term]; 2xPhospho [S4(100); T13(91.5)]	1xCarbamidomethyl [C17]; 1xTMT6plex [K1]; 1xTMT6plex [N-Term]; 2xPhospho [S4(100); T8(0.1); S10(0.7); T11(7.7); T13(91.5)]	P97303 2xPhospho [S314(100); T323(91.5)]	P97303 2xPhospho [S314(100); T318(0.1); S320(0.7); T321(7.7); T323(91.5)]	7.53e-05	0	1.635	1	1	6	P97303	P97303	Transcription regulator protein BACH2 OS=Mus musculus OX=10090 GN=Bach2 PE=1 SV=3	Bach2	Bach2_S314;T323	NO	P97303	P97303 [311-330]	1	2670.28	20	0	0.89	1.112	1.503	-0.17	0.15	0.59	0.421196	0.49458	0.193994	0.956621	0.965376	0.718941	6.26	29.91	33.99	8.58609	8.13648	8.18388	0.949		0.843		0.89
673	High	Unambiguous	HKMSPPPSSFNEPR	[R].HKMSPPPSSFNEPR.[S]	1xTMT6plex [K2]; 1xTMT6plex [N-Term]; 1xPhospho [S4(99.9)]	1xTMT6plex [K2]; 1xTMT6plex [N-Term]; 1xPhospho [S4(99.9); S8(0.1); S9(0)]	Q9CW46 1xPhospho [S626(99.9)]	Q9CW46 1xPhospho [S626(99.9); S630(0.1); S631(0)]	0.000394558	0	1.304	1	1	3	Q9CW46	Q9CW46	Ribonucleoprotein PTB-binding 1 OS=Mus musculus OX=10090 GN=Raver1 PE=1 SV=2	Raver1	Raver1_S626	NO	Q9CW46	Q9CW46 [623-636]	1	2149.07	14	0	0.893	0.902	0.78	-0.16	-0.15	-0.36	0.442597	0.453335	0.271435	0.968069	0.964129	0.846257	5.67	8.72	9.63	8.88264	8.93634	8.81442	1.01		0.851		0.893
1486	High	Unambiguous	SAGSSSPEAGEDSDHEDGNYCPPVKR	[R].SAGSSSPEAGEDSDHEDGNYCPPVKR.[E]	1xCarbamidomethyl [C21]; 1xTMT6plex [K25]; 1xTMT6plex [N-Term]; 3xPhospho [S5(90.2); S6(90.2); S13(100)]	1xCarbamidomethyl [C21]; 1xTMT6plex [K25]; 1xTMT6plex [N-Term]; 3xPhospho [S1(0); S4(19.7); S5(90.2); S6(90.2); S13(100); Y20(0)]	Q9CT10 3xPhospho [S32(90.2); S33(90.2); S40(100)]	Q9CT10 3xPhospho [S28(0); S31(19.7); S32(90.2); S33(90.2); S40(100); Y47(0)]	0.000173451	0	1.469	1	1	22	Q9CT10	Q9CT10	Ran-binding protein 3 OS=Mus musculus OX=10090 GN=Ranbp3 PE=1 SV=2	Ranbp3	Ranbp3_S40;S32;S33	NO	Q9CT10	Q9CT10 [28-53]	1	3446.37	26	0	1.025	0.995	1.18	0.04	-0.01	0.24	0.853534	0.976926	0.634751	0.999182	0.999409	0.998116	10.06	11.71	40.99	9.21383	8.87682	9.38586	0.553	1.095	1.025	1.066	0.926
30	High	Unambiguous	MEDIDQSSLVSSSADSPPRPPPAFK	[-].MEDIDQSSLVSSSADSPPRPPPAFK.[Y]	1xAcetyl [N-Term]; 1xTMT6plex [K25]; 1xTMT6plex [N-Term]; 1xPhospho [S16(100)]	1xAcetyl [N-Term]; 1xTMT6plex [K25]; 1xTMT6plex [N-Term]; 1xPhospho [S7(0); S8(0); S11(0); S12(0); S13(0); S16(100)]	Q99P72 1xAcetyl [N-Term]; 1xPhospho [S16(100)]	Q99P72 1xAcetyl [N-Term]; 1xPhospho [S7(0); S8(0); S11(0); S12(0); S13(0); S16(100)]	8.03e-10	0	3.903	1	1	13	Q99P72	Q99P72	Reticulon-4 OS=Mus musculus OX=10090 GN=Rtn4 PE=1 SV=2	Rtn4	Rtn4_S16	YES	Q99P72	Q99P72 [1-25]	0	3238.57	25	0	1.075	0.908	1.029	0.1	-0.14	0.04	0.577658	0.601698	0.879465	0.98968	0.983853	0.99895	12.15	8.4	16.51	6.46434	6.57592	6.2891	0.801	1.163	1.075	1.101	0.85
1599	High	Unambiguous	RPAASSAAAASAAASSPAGGGGEAQELLEHCGVCR	[K].RPAASSAAAASAAASSPAGGGGEAQELLEHCGVCR.[E]	2xCarbamidomethyl [C31; C34]; 1xTMT6plex [N-Term]; 1xPhospho [S16(98.3)]	2xCarbamidomethyl [C31; C34]; 1xTMT6plex [N-Term]; 1xPhospho [S5(0); S6(0); S11(0); S15(1.7); S16(98.3)]	Q62318 1xPhospho [S51(98.3)]	Q62318 1xPhospho [S40(0); S41(0); S46(0); S50(1.7); S51(98.3)]	1.35e-08	0	3.344	1	1	16	Q62318	Q62318	Transcription intermediary factor 1-beta OS=Mus musculus OX=10090 GN=Trim28 PE=1 SV=3	Trim28	Trim28_S51	YES	Q62318	Q62318 [36-70]	0	3633.67	35	0	0.93	1.014	1.092	-0.11	0.02	0.13	0.651894	0.911792	0.820569	0.98968	0.997187	0.998116	14.26	19	33.16	8.22304	7.90509	8.16239	0.83	1.033	0.737	1.117	0.93
667	High	Unambiguous	HLMDVGSDDDDTK	[R].HLMDVGSDDDDTK.[S]	1xTMT6plex [K13]; 1xTMT6plex [N-Term]; 1xPhospho [S7(100)]	1xTMT6plex [K13]; 1xTMT6plex [N-Term]; 1xPhospho [S7(100); T12(0)]	Q62431 1xPhospho [S127(100)]	Q62431 1xPhospho [S127(100); T132(0)]	1.55e-07	0	2.861	1	1	5	Q62431	Q62431	AT-rich interactive domain-containing protein 3A OS=Mus musculus OX=10090 GN=Arid3a PE=1 SV=1	Arid3a	Arid3a_S127	YES	Q62431	Q62431 [121-133]	0	1985.89	13	0	0.987	0.853	1.05	-0.02	-0.23	0.07	0.925365	0.237003	0.988075	0.999853	0.847744	0.999899	10.23	7.92	12.08	8.49969	8.56647	8.42094	1.695	0.953	1.022		0.882
5046	High	Unambiguous	SSTPEEVK	[K].SSTPEEVK.[K]	1xTMT6plex [K8]; 1xTMT6plex [N-Term]; 1xPhospho [S/T]	1xTMT6plex [K8]; 1xTMT6plex [N-Term]; 1xPhospho [S1(0.2); S2(49.9); T3(49.9)]	P18760 1xPhospho [S/T]	P18760 1xPhospho [S23(0.2); S24(49.9); T25(49.9)]	0.0130774	0.00157079	0.592	1	1	3	P18760	P18760	Cofilin-1 OS=Mus musculus OX=10090 GN=Cfl1 PE=1 SV=3	Cfl1	Cfl1_T25	YES	P18760	P18760 [23-30]	0	1414.72	8	0	0.889	1.072	0.975	-0.17	0.1	-0.04	0.407583	0.576368	0.848844	0.950888	0.983022	0.998116	0.08	0.42	4.61	9.61047	8.63735	9.11504	0.889		0.888		1.049
4968	High	Unambiguous	AEMADSNRSPR	[R].AEMADSNRSPR.[S]	1xOxidation [M3]; 1xTMT6plex [N-Term]; 1xPhospho [S9(100)]	1xOxidation [M3]; 1xTMT6plex [N-Term]; 1xPhospho [S6(0); S9(100)]	P13864 1xPhospho [S125(100)]	P13864 1xPhospho [S122(0); S125(100)]	0.0112819	0.00131309	0.62	1	1	10	P13864	P13864	DNA (cytosine-5)-methyltransferase 1 OS=Mus musculus OX=10090 GN=Dnmt1 PE=1 SV=5	Dnmt1	Dnmt1_S125	YES	P13864	P13864 [117-127]	1	1558.69	11	0	1.038	0.932	4.684	0.05	-0.1	2.23	0.851852	0.601248	6.24e-10	0.999182	0.983853	3.04e-08	0.22	13.89	44.61	10.1709	9.56453	9.69784	0.795	1.039	1.038
540	High	Unambiguous	KGTGDCSDEEVDGK	[R].KGTGDCSDEEVDGK.[A]	1xCarbamidomethyl [C6]; 2xTMT6plex [K1; K14]; 1xTMT6plex [N-Term]; 1xPhospho [S7(100)]	1xCarbamidomethyl [C6]; 2xTMT6plex [K1; K14]; 1xTMT6plex [N-Term]; 1xPhospho [T3(0); S7(100)]	Q8VDD5 1xPhospho [S1943(100)]	Q8VDD5 1xPhospho [T1939(0); S1943(100)]	5.75e-06	0	2.145	1	1	20	Q8VDD5	Q8VDD5	Myosin-9 OS=Mus musculus OX=10090 GN=Myh9 PE=1 SV=4	Myh9	Myh9_S1943	YES	Q8VDD5	Q8VDD5 [1937-1950]	1	2264.07	14	0	0.933	0.876	0.662	-0.1	-0.19	-0.59	0.581809	0.26106	0.0540145	0.98968	0.859772	0.33847	3.82	17.8	30.86	10.7673	10.4667	11.1666	1.176	0.907	1.061	0.905	0.933
1081	High	Unambiguous	STSATDTHHVELAR	[R].STSATDTHHVELAR.[E]	1xTMT6plex [N-Term]; 1xPhospho [S1(98.9)]	1xTMT6plex [N-Term]; 1xPhospho [S1(98.9); T2(0.5); S3(0.5); T5(0); T7(0)]	O55028 1xPhospho [S31(98.9)]	O55028 1xPhospho [S31(98.9); T32(0.5); S33(0.5); T35(0); T37(0)]	6.1e-05	0	1.677	1	1	6	O55028	O55028	[3-methyl-2-oxobutanoate dehydrogenase [lipoamide]] kinase; mitochondrial OS=Mus musculus OX=10090 GN=Bckdk PE=1 SV=1	Bckdk	Bckdk_S31	YES	O55028	O55028 [31-44]	0	1833.87	14	0	1.036	1.029	0.9	0.05	0.04	-0.15	0.761738	0.834663	0.69633	0.997986	0.995193	0.998116	7.35	9.64	21.56	7.88471	7.29294	7.74472	0.824	1.074	1.102		1
2138	High	Unambiguous	DSESESDETPTVPQLK	[R].DSESESDETPTVPQLK.[E]	1xTMT6plex [K16]; 1xTMT6plex [N-Term]; 1xPhospho [S4(92)]	1xTMT6plex [K16]; 1xTMT6plex [N-Term]; 1xPhospho [S2(0.6); S4(92); S6(7.4); T9(0); T11(0)]	Q9ESX5 1xPhospho [S453(92)]	Q9ESX5 1xPhospho [S451(0.6); S453(92); S455(7.4); T458(0); T460(0)]	0.000468885	0	1.269	1	1	10	Q9ESX5	Q9ESX5	H/ACA ribonucleoprotein complex subunit 4 OS=Mus musculus OX=10090 GN=Dkc1 PE=1 SV=4	Dkc1	Dkc1_S455	YES	Q9ESX5	Q9ESX5 [450-465]	0	2300.09	16	0	0.102	0.329	0.23	-3.29	-1.6	-2.12	1e-17	1.05e-11	1.79e-07	1.52e-15	1.9e-09	6.11e-06	0.11	10.56	4.35	8.7662	7.5932	8.07575	0.097	0.102	0.65	0.109	0.089
3328	High	Unambiguous	QIPDQDENPSPAASK	[K].QIPDQDENPSPAASK.[S]	1xTMT6plex [K15]; 1xTMT6plex [N-Term]; 1xPhospho [S10(100)]	1xTMT6plex [K15]; 1xTMT6plex [N-Term]; 1xPhospho [S10(100); S14(0)]	O55098 1xPhospho [S437(100)]	O55098 1xPhospho [S437(100); S441(0)]	0.0010826	0.000209709	1.097	1	1	4	O55098	O55098	Serine/threonine-protein kinase 10 OS=Mus musculus OX=10090 GN=Stk10 PE=1 SV=2	Stk10	Stk10_S437	YES	O55098	O55098 [428-442]	0	2135.04	15	0	0.738	0.836	0.792	-0.44	-0.26	-0.34	0.0619169	0.299019	0.350159	0.418338	0.896247	0.919404	6.82	6.52	16.13	7.96038	7.69875	7.92155	0.631		0.946	0.72	0.756
4586	High	Unambiguous	FAELPEFRPEEVLPSPTLQSLATSPR	[R].FAELPEFRPEEVLPSPTLQSLATSPR.[A]	1xTMT6plex [N-Term]; 1xPhospho [S24(88.3)]	1xTMT6plex [N-Term]; 1xPhospho [S15(0); T17(0); S20(0); T23(11.7); S24(88.3)]	Q924A2 1xPhospho [S2284(88.3)]	Q924A2 1xPhospho [S2275(0); T2277(0); S2280(0); T2283(11.7); S2284(88.3)]	0.00817482	0.000907142	0.682	1	1	5	Q924A2	Q924A2	Protein capicua homolog OS=Mus musculus OX=10090 GN=Cic PE=1 SV=2	Cic	Cic_S2284	NO	Q924A2	Q924A2 [2261-2286]	0	3220.65	26	0	0.918	0.961	0.847	-0.12	-0.06	-0.24	0.782519	0.926323	0.54516	0.998955	0.997187	0.996923	20.69	12.12	28.41	5.71149	5.94017	5.76553	0.918	1.07			0.675
1604	High	Unambiguous	RISDPQVFSK	[R].RISDPQVFSK.[E]	1xTMT6plex [K10]; 1xTMT6plex [N-Term]; 1xPhospho [S3(100)]	1xTMT6plex [K10]; 1xTMT6plex [N-Term]; 1xPhospho [S3(100); S9(0)]	Q6P6L0 1xPhospho [S789(100)]	Q6P6L0 1xPhospho [S789(100); S795(0)]	5.04e-06	0	2.171	1	1	12	Q6P6L0	Q6P6L0	Filamin A-interacting protein 1-like OS=Mus musculus OX=10090 GN=Filip1l PE=1 SV=2	Filip1l	Filip1l_S789	YES	Q6P6L0	Q6P6L0 [787-796]	1	1714.93	10	0	0.791	0.931	0.822	-0.34	-0.1	-0.28	0.0905676	0.600872	0.322939	0.524299	0.983853	0.896843	13.96	24.3	19.22	10.5033	9.82018	10.3866	0.62	0.91	0.699	0.791	0.91
2015	High	Unambiguous	EALVEPASESPRPALAR	[R].EALVEPASESPRPALAR.[S]	1xTMT6plex [N-Term]; 1xPhospho [S10(100)]	1xTMT6plex [N-Term]; 1xPhospho [S8(0); S10(100)]	P70441 1xPhospho [S275(100)]	P70441 1xPhospho [S273(0); S275(100)]	4.49e-07	0	2.65	1	1	12	P70441	P70441	Na(+)/H(+) exchange regulatory cofactor NHE-RF1 OS=Mus musculus OX=10090 GN=Slc9a3r1 PE=1 SV=3	Slc9a3r1	Slc9a3r1_S275	YES	P70441	P70441 [266-282]	0	2102.08	17	0	1.095	1.012	1.082	0.13	0.02	0.11	0.57566	0.875922	0.834409	0.98968	0.996046	0.998116	6.25	2.3	20.17	10.2855	9.82861	10.3337	1.126	1.033	0.819	1.095	1.142
499	High	Unambiguous	KAESQNESSQGK	[R].KAESQNESSQGK.[S]	2xTMT6plex [K1; K12]; 1xTMT6plex [N-Term]; 1xPhospho [S]	2xTMT6plex [K1; K12]; 1xTMT6plex [N-Term]; 1xPhospho [S4(0); S8(50); S9(50)]	Q8C0V0 1xPhospho [S]	Q8C0V0 1xPhospho [S129(0); S133(50); S134(50)]	0.000377385	0	1.313	1	1	6	Q8C0V0	Q8C0V0	Serine/threonine-protein kinase tousled-like 1 OS=Mus musculus OX=10090 GN=Tlk1 PE=1 SV=2	Tlk1	Tlk1_[S133/S134]	NO	Q8C0V0	Q8C0V0 [126-137]	1	2060.06	12	0	0.874	0.925	0.886	-0.19	-0.11	-0.18	0.318402	0.516228	0.507994	0.894373	0.971163	0.986885	10.24	12.09	7	10.1827	10.0769	10.0333	0.905		0.588	0.844	1.001
929	High	Unambiguous	TLSPTPSAEGYQDVR	[R].TLSPTPSAEGYQDVR.[D]	1xTMT6plex [N-Term]; 1xPhospho [T/S/Y]	1xTMT6plex [N-Term]; 1xPhospho [T1(50); S3(50); T5(0); S7(0); Y11(0)]	Q8K4G5 1xPhospho [T/S/Y]	Q8K4G5 1xPhospho [T473(50); S475(50); T477(0); S479(0); Y483(0)]	7.53e-05	0	1.635	1	1	5	Q8K4G5	Q8K4G5	Actin-binding LIM protein 1 OS=Mus musculus OX=10090 GN=Ablim1 PE=1 SV=1	Ablim1	Ablim1_S475	NO	Q8K4G5	Q8K4G5 [473-487]	0	1929.92	15	0	0.893	0.886	0.819	-0.16	-0.17	-0.29	0.531657	0.477234	0.348933	0.986329	0.965376	0.917964	13.41	10.95	22.87	8.10499	7.96175	8.25663	0.998	0.805	0.711	0.99
6332	High	Unambiguous	KDSPHSR	[R].KDSPHSR.[S]	1xTMT6plex [K1]; 1xTMT6plex [N-Term]; 1xPhospho [S3(100)]	1xTMT6plex [K1]; 1xTMT6plex [N-Term]; 1xPhospho [S3(100); S6(0)]	Q8K2H1 1xPhospho [S154(100)]	Q8K2H1 1xPhospho [S154(100); S157(0)]	0.0785464	0.00756518	0.267	1	1	3	Q8K2H1	Q8K2H1	Periphilin-1 OS=Mus musculus OX=10090 GN=Pphln1 PE=1 SV=1	Pphln1	Pphln1_S154	NO	Q8K2H1	Q8K2H1 [152-158]	1	1364.71	7	0	0.998	1.017	1.265	0	0.02	0.34	0.969249	0.905838	0.492499	0.99999	0.997038	0.984677	4.68	18.13	27.13	9.55574	9.03205	9.33427	0.998	1.03	0.811
1979	High	Unambiguous	SMLAISGHLDSDDDSGSGSLVGIDNK	[R].SMLAISGHLDSDDDSGSGSLVGIDNK.[I]	1xOxidation [M2]; 1xTMT6plex [K26]; 1xTMT6plex [N-Term]; 1xPhospho [S11(100)]	1xOxidation [M2]; 1xTMT6plex [K26]; 1xTMT6plex [N-Term]; 1xPhospho [S1(0); S6(0); S11(100); S15(0); S17(0); S19(0)]	Q9EQN3 1xPhospho [S298(100)]	Q9EQN3 1xPhospho [S288(0); S293(0); S298(100); S302(0); S304(0); S306(0)]	0.000300408	0	1.359	1	1	4	Q9EQN3	Q9EQN3	TSC22 domain family protein 4 OS=Mus musculus OX=10090 GN=Tsc22d4 PE=1 SV=2	Tsc22d4	Tsc22d4_S298	YES	Q9EQN3	Q9EQN3 [288-313]	0	3144.48	26	0	1.016	1.241	0.972	0.02	0.31	-0.04	0.750894	0.184734	0.915757	0.997986	0.789806	0.999462	10.24	1.52	0.8	7.03672	6.2891	7.13955		1.086	1.016		0.933
666	High	Unambiguous	HLMDVGSDDDDTK	[R].HLMDVGSDDDDTK.[S]	1xOxidation [M3]; 1xTMT6plex [K13]; 1xTMT6plex [N-Term]; 1xPhospho [S7(100)]	1xOxidation [M3]; 1xTMT6plex [K13]; 1xTMT6plex [N-Term]; 1xPhospho [S7(100); T12(0)]	Q62431 1xPhospho [S127(100)]	Q62431 1xPhospho [S127(100); T132(0)]	1.15e-07	0	2.92	1	1	8	Q62431	Q62431	AT-rich interactive domain-containing protein 3A OS=Mus musculus OX=10090 GN=Arid3a PE=1 SV=1	Arid3a	Arid3a_S127	YES	Q62431	Q62431 [121-133]	0	2001.89	13	0	0.903	0.873	1.019	-0.15	-0.2	0.03	0.441021	0.247549	0.958488	0.968069	0.853713	0.999899	4.81	10.95	18.32	10.105	10.1721	10.1934	1.422	0.878	0.857		0.929
1600	High	Unambiguous	RPAAAAAAGSASPR	[K].RPAAAAAAGSASPR.[S]	1xTMT6plex [N-Term]; 1xPhospho [S12(99.7)]	1xTMT6plex [N-Term]; 1xPhospho [S10(0.3); S12(99.7)]	Q91XU0 1xPhospho [S153(99.7)]	Q91XU0 1xPhospho [S151(0.3); S153(99.7)]	2.37e-05	0	1.864	1	1	8	Q91XU0	Q91XU0	ATPase WRNIP1 OS=Mus musculus OX=10090 GN=Wrnip1 PE=1 SV=2	Wrnip1	Wrnip1_S153	YES	Q91XU0	Q91XU0 [142-155]	0	1562.8	14	0	0.898	0.823	0.938	-0.16	-0.28	-0.09	0.462276	0.166857	0.743493	0.972882	0.765865	0.998116	4.58	4.77	11.25	8.93232	8.44334	9.09619	0.9	0.896	0.965		0.823
1028	High	Unambiguous	TPSCQDIVAGDMSK	[K].TPSCQDIVAGDMSK.[K]	1xCarbamidomethyl [C4]; 1xOxidation [M12]; 1xTMT6plex [K14]; 1xTMT6plex [N-Term]; 1xPhospho [S3(99.9)]	1xCarbamidomethyl [C4]; 1xOxidation [M12]; 1xTMT6plex [K14]; 1xTMT6plex [N-Term]; 1xPhospho [T1(0.1); S3(99.9); S13(0)]	P19973 1xPhospho [S273(99.9)]	P19973 1xPhospho [T271(0.1); S273(99.9); S283(0)]	1.1e-05	0	2.016	1	1	21	P19973	P19973	Lymphocyte-specific protein 1 OS=Mus musculus OX=10090 GN=Lsp1 PE=1 SV=2	Lsp1	Lsp1_S273	YES	P19973	P19973 [271-284]	0	2062.96	14	0	1.081	1.269	1.378	0.11	0.34	0.46	0.57899	0.0603045	0.300552	0.98968	0.503155	0.871128	14.02	20.59	21.01	8.58989	8.43257	8.21463	1.057	1.106	0.901		1.38
992	High	Unambiguous	TSALLFSSDEEDQWNIADSHTK	[K].TSALLFSSDEEDQWNIADSHTK.[L]	1xTMT6plex [K22]; 1xTMT6plex [N-Term]; 1xPhospho [S8(100)]	1xTMT6plex [K22]; 1xTMT6plex [N-Term]; 1xPhospho [T1(0); S2(0); S7(0); S8(100); S19(0); T21(0)]	Q6PGL7 1xPhospho [S614(100)]	Q6PGL7 1xPhospho [T607(0); S608(0); S613(0); S614(100); S625(0); T627(0)]	1.11e-07	0	2.926	1	1	13	Q6PGL7	Q6PGL7	WASH complex subunit 2 OS=Mus musculus OX=10090 GN=Washc2 PE=1 SV=1	Washc2	Washc2_S614	YES	Q6PGL7	Q6PGL7 [607-628]	0	3032.43	22	0	0.884	1.002	0.898	-0.18	0	-0.16	0.415002	0.9954	0.568563	0.955672	0.999874	0.996923	5.49	7.84	12.67	8.732	8.08268	8.76653	0.997	1.203	0.858	0.884	0.842
3212	High	Unambiguous	AEAKEESEESDEDMGFGLFD	[K].AEAKEESEESDEDMGFGLFD.[-]	1xOxidation [M14]; 1xTMT6plex [K4]; 1xTMT6plex [N-Term]; 1xPhospho [S7(99.3)]	1xOxidation [M14]; 1xTMT6plex [K4]; 1xTMT6plex [N-Term]; 1xPhospho [S7(99.3); S10(0.7)]	P14869 1xPhospho [S304(99.3)]	P14869 1xPhospho [S304(99.3); S307(0.7)]	0.000818011	0.000209709	1.155	1	1	8	P14869	P14869	60S acidic ribosomal protein P0 OS=Mus musculus OX=10090 GN=Rplp0 PE=1 SV=3	Rplp0	Rplp0_S307	YES	P14869	P14869 [298-317]	1	2789.18	20	0	0.601	0.725	0.668	-0.73	-0.46	-0.58	0.00598397	0.0666874	0.111941	0.079379	0.533008	0.532453	2.2	5.91	8.63	6.2555	6.48543	6.07895	0.593	0.742	0.921	0.601	0.576
17	High	Unambiguous	MVQASSQSLLPPAQDRPRSPVPSAFSDQSR	[R].MVQASSQSLLPPAQDRPRSPVPSAFSDQSR.[S]	1xTMT6plex [N-Term]; 1xPhospho [S19(99.8)]	1xTMT6plex [N-Term]; 1xPhospho [S5(0); S6(0); S8(0); S19(99.8); S23(0.1); S26(0.1); S29(0)]	Q8BTI8 1xPhospho [S2404(99.8)]	Q8BTI8 1xPhospho [S2390(0); S2391(0); S2393(0); S2404(99.8); S2408(0.1); S2411(0.1); S2414(0)]	9.59e-05	0	1.587	1	1	4	Q8BTI8	Q8BTI8	Serine/arginine repetitive matrix protein 2 OS=Mus musculus OX=10090 GN=Srrm2 PE=1 SV=3	Srrm2	Srrm2_S2404	YES	Q8BTI8	Q8BTI8 [2386-2415]	1	3548.75	30	0	0.728	1.27	1.187	-0.46	0.34	0.25	0.104986	0.154997	0.445882	0.566565	0.753496	0.970969	6.11	2.65	13.22	6.22497	6.1127	6.17592	0.672	0.915	0.728
3213	High	Unambiguous	LLPEFDDSDYDDVPEEGPGAPASVMTK	[R].LLPEFDDSDYDDVPEEGPGAPASVMTK.[E]	1xOxidation [M25]; 1xTMT6plex [K27]; 1xTMT6plex [N-Term]; 1xPhospho [S8(87.4)]	1xOxidation [M25]; 1xTMT6plex [K27]; 1xTMT6plex [N-Term]; 1xPhospho [S8(87.4); Y10(12.6); S23(0); T26(0)]	Q4LDD4 1xPhospho [S232(87.4)]	Q4LDD4 1xPhospho [S232(87.4); Y234(12.6); S247(0); T250(0)]	0.00086277	0.000209709	1.144	1	1	8	Q4LDD4	Q4LDD4	Arf-GAP with Rho-GAP domain; ANK repeat and PH domain-containing protein 1 OS=Mus musculus OX=10090 GN=Arap1 PE=1 SV=2	Arap1	Arap1_S232	YES	Q4LDD4	Q4LDD4 [225-251]	0	3448.58	27	0	0.845	0.903	0.632	-0.24	-0.15	-0.66	0.382343	0.677126	0.110635	0.935368	0.99264	0.528226	18.75	7.48	35.58	6.70899	5.9333	6.98853	0.72	0.99	0.998	0.619
475	High	Unambiguous	KAAVLSDSEDDAGNASAK	[R].KAAVLSDSEDDAGNASAK.[K]	2xTMT6plex [K1; K18]; 1xTMT6plex [N-Term]; 1xPhospho [S8(100)]	2xTMT6plex [K1; K18]; 1xTMT6plex [N-Term]; 1xPhospho [S6(0); S8(100); S16(0)]	Q8C1D8 1xPhospho [S345(100)]	Q8C1D8 1xPhospho [S343(0); S345(100); S353(0)]	7.94e-06	0	2.081	1	1	5	Q8C1D8	Q8C1D8	Protein IWS1 homolog OS=Mus musculus OX=10090 GN=Iws1 PE=1 SV=1	Iws1	Iws1_S345	YES	Q8C1D8	Q8C1D8 [338-355]	1	2516.28	18	0	0.762	1.003	1.286	-0.39	0	0.36	0.0901107	0.911422	0.424527	0.52245	0.997187	0.961797	6.75	2.24	23.74	8.26913	7.83415	8.26397	0.762	1.039	0.703
5770	High	Unambiguous	LNHSPPQSSSR	[R].LNHSPPQSSSR.[Y]	1xTMT6plex [N-Term]; 1xPhospho [S4(100)]	1xTMT6plex [N-Term]; 1xPhospho [S4(100); S8(0); S9(0); S10(0)]	Q6NZN0 1xPhospho [S127(100)]	Q6NZN0 1xPhospho [S127(100); S131(0); S132(0); S133(0)]	0.0347242	0.00388682	0.411	1	1	8	Q6NZN0	Q6NZN0	RNA-binding protein 26 OS=Mus musculus OX=10090 GN=Rbm26 PE=1 SV=2	Rbm26	Rbm26_S127	YES	Q6NZN0	Q6NZN0 [124-134]	0	1518.73	11	0	0.904	1.069	0.951	-0.15	0.1	-0.07	0.49356	0.586638	0.710799	0.979638	0.983139	0.998116	9.94	38.29	9.42	8.77413	8.27146	8.74281	0.83	0.986	1.131	0.872	0.904
1494	High	Unambiguous	SAFTPATATGSSPSPVLGQGEK	[R].SAFTPATATGSSPSPVLGQGEK.[V]	1xTMT6plex [K22]; 1xTMT6plex [N-Term]; 1xPhospho [S14(100)]	1xTMT6plex [K22]; 1xTMT6plex [N-Term]; 1xPhospho [S1(0); T4(0); T7(0); T9(0); S11(0); S12(0); S14(100)]	Q9Z0R4 1xPhospho [S897(100)]	Q9Z0R4 1xPhospho [S884(0); T887(0); T890(0); T892(0); S894(0); S895(0); S897(100)]	1.45e-06	0	2.418	1	1	5	Q9Z0R4	Q9Z0R4	Intersectin-1 OS=Mus musculus OX=10090 GN=Itsn1 PE=1 SV=2	Itsn1	Itsn1_S897	YES	Q9Z0R4	Q9Z0R4 [884-905]	0	2628.33	22	0	1.028	1.1	1.009	0.04	0.14	0.01	0.707206	0.525358	0.981102	0.989834	0.971331	0.999899	12.72	18.11	50.51	7.07708	6.3537	7.05958	0.777	1.175	0.999		1.058
432	High	Unambiguous	QFSPTMSPTLSSITQGVPLDTSK	[K].QFSPTMSPTLSSITQGVPLDTSK.[L]	1xTMT6plex [K23]; 1xTMT6plex [N-Term]; 1xPhospho [S3(92.6)]	1xTMT6plex [K23]; 1xTMT6plex [N-Term]; 1xPhospho [S3(92.6); T5(7.3); S7(0.1); T9(0); S11(0); S12(0); T14(0); T21(0); S22(0)]	Q3U182 1xPhospho [S457(92.6)]	Q3U182 1xPhospho [S457(92.6); T459(7.3); S461(0.1); T463(0); S465(0); S466(0); T468(0); T475(0); S476(0)]	8.39e-06	0	2.07	1	1	5	Q3U182	Q3U182	CREB-regulated transcription coactivator 2 OS=Mus musculus OX=10090 GN=Crtc2 PE=1 SV=2	Crtc2	Crtc2_S457	YES	Q3U182	Q3U182 [455-477]	0	2960.51	23	0	0.9	0.785	0.947	-0.15	-0.35	-0.08	0.613736	0.0708564	0.767159	0.98968	0.547368	0.998116	5.46	3.87	10.34	7.69429	7.22113	7.37982	1.017		0.861	0.941	0.859
1234	High	Unambiguous	VQRPEDASGGSSPSGTSK	[R].VQRPEDASGGSSPSGTSK.[S]	1xTMT6plex [K18]; 1xTMT6plex [N-Term]; 1xPhospho [S12(86.5)]	1xTMT6plex [K18]; 1xTMT6plex [N-Term]; 1xPhospho [S8(0); S11(6.8); S12(86.5); S14(6.8); T16(0.1); S17(0)]	P70429 1xPhospho [S244(86.5)]	P70429 1xPhospho [S240(0); S243(6.8); S244(86.5); S246(6.8); T248(0.1); S249(0)]	3.8e-05	0	1.771	1	1	11	P70429	P70429	Ena/VASP-like protein OS=Mus musculus OX=10090 GN=Evl PE=1 SV=2	Evl	Evl_[S243/S244]	YES	P70429	P70429 [233-250]	0	2285.12	18	0	1.037	1.028	0.945	0.05	0.04	-0.08	0.766881	0.858302	0.697674	0.997986	0.996046	0.998116	11.01	31.14	57.34	8.74012	8.14262	8.75822	1.037	0.96	1.172	0.977	1.153
4488	High	Unambiguous	NHSGSRTPPVALSSSR	[R].NHSGSRTPPVALSSSR.[M]	1xTMT6plex [N-Term]; 2xPhospho [S3(100); S5(100)]	1xTMT6plex [N-Term]; 2xPhospho [S3(100); S5(100); T7(0); S13(0); S14(0); S15(0)]	Q8BTI8 2xPhospho [S2052(100); S2054(100)]	Q8BTI8 2xPhospho [S2052(100); S2054(100); T2056(0); S2062(0); S2063(0); S2064(0)]	0.00585282	0.000907142	0.748	1	1	6	Q8BTI8	Q8BTI8	Serine/arginine repetitive matrix protein 2 OS=Mus musculus OX=10090 GN=Srrm2 PE=1 SV=3	Srrm2	Srrm2_S2052;S2054	YES	Q8BTI8	Q8BTI8 [2050-2065]	1	2041.94	16	0	0.705	1.147	1.043	-0.5	0.2	0.06	0.0137554	0.245513	0.994215	0.148939	0.852244	0.999899	11.95	12.85	20.1	9.22714	8.38933	8.83828	0.536	0.997	0.65		0.765
3084	High	Unambiguous	ASPFSVSPTGPSTK	[K].ASPFSVSPTGPSTK.[I]	1xTMT6plex [K14]; 1xTMT6plex [N-Term]; 1xPhospho [S7(100)]	1xTMT6plex [K14]; 1xTMT6plex [N-Term]; 1xPhospho [S2(0); S5(0); S7(100); T9(0); S12(0); T13(0)]	Q00196 1xPhospho [S55(100)]	Q00196 1xPhospho [S50(0); S53(0); S55(100); T57(0); S60(0); T61(0)]	0.000909922	0.000209709	1.133	1	1	6	Q00196	Q00196	POU domain; class 2; transcription factor 2 OS=Mus musculus OX=10090 GN=Pou2f2 PE=2 SV=4	Pou2f2	Pou2f2_S55	YES	Q00196	Q00196 [49-62]	0	1900.98	14	0	0.895	0.875	1.072	-0.16	-0.19	0.1	0.462061	0.311764	0.952954	0.972882	0.897839	0.999899	4.52	22.11	34.12	9.07708	8.74584	8.74517	1.172	0.861	0.937	0.867	0.895
2901	High	Unambiguous	GHHDDSDEDASPDKTALSSTK	[R].GHHDDSDEDASPDKTALSSTK.[E]	2xTMT6plex [K14; K21]; 1xTMT6plex [N-Term]; 1xPhospho [S6(100)]	2xTMT6plex [K14; K21]; 1xTMT6plex [N-Term]; 1xPhospho [S6(100); S11(0); T15(0); S18(0); S19(0); T20(0)]	E9Q309 1xPhospho [S1641(100)]	E9Q309 1xPhospho [S1641(100); S1646(0); T1650(0); S1653(0); S1654(0); T1655(0)]	6.19e-05	0	1.674	1	1	5	E9Q309	E9Q309	Centrosome-associated protein 350 OS=Mus musculus OX=10090 GN=Cep350 PE=1 SV=1	Cep350	Cep350_S1641	YES	E9Q309	E9Q309 [1636-1656]	1	2980.41	21	0	0.933	1.075	1.064	-0.1	0.1	0.09	0.793579	0.590222	0.818788	0.998955	0.983498	0.998116	18.68	9.65	30.16	7.71287	7.22882	7.77742	0.705	1.098	0.921	0.933	1.068
1883	High	Unambiguous	SLAFPDLSEGSSTEDLFQSVKPR	[K].SLAFPDLSEGSSTEDLFQSVKPR.[A]	1xTMT6plex [K21]; 1xTMT6plex [N-Term]; 3xPhospho [S8(99.6); S/T]	1xTMT6plex [K21]; 1xTMT6plex [N-Term]; 3xPhospho [S1(0); S8(99.6); S11(66.8); S12(66.8); T13(66.8); S19(0)]	Q6PGL7 3xPhospho [S1169(99.6); S/T]	Q6PGL7 3xPhospho [S1162(0); S1169(99.6); S1172(66.8); S1173(66.8); T1174(66.8); S1180(0)]	4.18e-06	0	2.208	1	1	7	Q6PGL7	Q6PGL7	WASH complex subunit 2 OS=Mus musculus OX=10090 GN=Washc2 PE=1 SV=1	Washc2	Washc2_S1169;S1173;T1174	YES	Q6PGL7	Q6PGL7 [1162-1184]	0	3208.47	23	0	0.982	1.044	0.952	-0.03	0.06	-0.07	0.933403	0.743424	0.857867	0.999971	0.99264	0.998116	5.75	10.22	17.31	7.47324	6.9036	7.77695		1.155	0.928	0.957	1.007
2246	High	Unambiguous	ETTHAQSGSESSSQEAAPK	[R].ETTHAQSGSESSSQEAAPK.[K]	1xTMT6plex [K19]; 1xTMT6plex [N-Term]; 1xPhospho [S13(99.7)]	1xTMT6plex [K19]; 1xTMT6plex [N-Term]; 1xPhospho [T2(0); T3(0); S7(0); S9(0); S11(0); S12(0.3); S13(99.7)]	Q9CT10 1xPhospho [S283(99.7)]	Q9CT10 1xPhospho [T272(0); T273(0); S277(0); S279(0); S281(0); S282(0.3); S283(99.7)]	9.97e-09	0	3.404	1	1	21	Q9CT10	Q9CT10	Ran-binding protein 3 OS=Mus musculus OX=10090 GN=Ranbp3 PE=1 SV=2	Ranbp3	Ranbp3_S283	YES	Q9CT10	Q9CT10 [271-289]	0	2470.15	19	0	0.495	0.438	0.652	-1.02	-1.19	-0.62	1.58e-05	1.84e-07	0.119622	0.000600699	1.84e-05	0.553967	10.96	9.32	14.6	7.80478	7.80349	7.73132	0.243	0.495	0.581	0.644	0.331
1183	High	Unambiguous	TSSLPGYGK	[K].TSSLPGYGK.[N]	1xTMT6plex [K9]; 1xTMT6plex [N-Term]; 1xPhospho [S3(99.6)]	1xTMT6plex [K9]; 1xTMT6plex [N-Term]; 1xPhospho [T1(0); S2(0.4); S3(99.6); Y7(0)]	Q8K4G5 1xPhospho [S738(99.6)]	Q8K4G5 1xPhospho [T736(0); S737(0.4); S738(99.6); Y742(0)]	0.000522406	0	1.247	1	1	6	Q8K4G5	Q8K4G5	Actin-binding LIM protein 1 OS=Mus musculus OX=10090 GN=Ablim1 PE=1 SV=1	Ablim1	Ablim1_S738	YES	Q8K4G5	Q8K4G5 [736-744]	0	1447.76	9	0	0.944	1.205	0.883	-0.08	0.27	-0.18	0.640998	0.13423	0.500745	0.98968	0.710136	0.984677	36.64	2.44	26.3	10.0382	9.51639	10.0239	1.348	0.822	0.56		1.084
863	High	Unambiguous	KSYESSEDCPEAASSPTR	[R].KSYESSEDCPEAASSPTR.[K]	1xCarbamidomethyl [C9]; 1xTMT6plex [K1]; 1xTMT6plex [N-Term]; 1xPhospho [S15(92)]	1xCarbamidomethyl [C9]; 1xTMT6plex [K1]; 1xTMT6plex [N-Term]; 1xPhospho [S2(0); Y3(0); S5(0); S6(0); S14(0.6); S15(92); T17(7.4)]	Q3TSG4 1xPhospho [S385(92)]	Q3TSG4 1xPhospho [S372(0); Y373(0); S375(0); S376(0); S384(0.6); S385(92); T387(7.4)]	0.000295961	0	1.362	1	1	11	Q3TSG4	Q3TSG4	RNA demethylase ALKBH5 OS=Mus musculus OX=10090 GN=Alkbh5 PE=1 SV=2	Alkbh5	Alkbh5_[S384/S385]	YES	Q3TSG4	Q3TSG4 [371-388]	1	2539.14	18	0	0.974	1.021	0.927	-0.04	0.03	-0.11	0.874951	0.838256	0.653276	0.999182	0.995193	0.998116	8.41	5.34	11.63	8.80093	8.50699	8.70988	0.967		0.864	1.371	0.981
122	High	Unambiguous	LNSQESDEEPQISDVPHISK	[R].LNSQESDEEPQISDVPHISK.[G]	1xTMT6plex [K20]; 1xTMT6plex [N-Term]; 1xPhospho [S]	1xTMT6plex [K20]; 1xTMT6plex [N-Term]; 1xPhospho [S3(50); S6(50); S13(0); S19(0)]	Q9QXZ0 1xPhospho [S]	Q9QXZ0 1xPhospho [S3082(50); S3085(50); S3092(0); S3098(0)]	5.38e-06	0	2.158	1	1	8	Q9QXZ0	Q9QXZ0	Microtubule-actin cross-linking factor 1 OS=Mus musculus OX=10090 GN=Macf1 PE=1 SV=2	Macf1	Macf1_[S3082/S3085]	YES	Q9QXZ0	Q9QXZ0 [3080-3099]	0	2790.36	20	0	0.782	0.879	0.741	-0.36	-0.19	-0.43	0.0880893	0.434897	0.227275	0.516227	0.95692	0.770394	3.47	14	13.74	8.75389	7.92422	8.4508	0.699	0.782	0.822	0.778	0.812
4940	High	Unambiguous	SSSPLSK	[M].SSSPLSK.[K]	1xAcetyl [N-Term]; 1xTMT6plex [K7]; 1xTMT6plex [N-Term]; 1xPhospho [S3(99.7)]	1xAcetyl [N-Term]; 1xTMT6plex [K7]; 1xTMT6plex [N-Term]; 1xPhospho [S1(0); S2(0.3); S3(99.7); S6(0)]	Q02053 1xAcetyl [N-Term]; 1xPhospho [S4(99.7)]	Q02053 1xAcetyl [N-Term]; 1xPhospho [S2(0); S3(0.3); S4(99.7); S7(0)]	0.0113413	0.00131309	0.619	1	1	10	Q02053	Q02053	Ubiquitin-like modifier-activating enzyme 1 OS=Mus musculus OX=10090 GN=Uba1 PE=1 SV=1	Uba1	Uba1_S4	YES	Q02053	Q02053 [2-8]	0	1285.68	7	0	0.879	1.003	1.03	-0.19	0	0.04	0.337008	0.95677	0.995069	0.901483	0.997758	0.999899	4.03	7.85	7.68	10.7506	10.4443	10.7148	0.868	0.972	0.829		0.89
4687	High	Unambiguous	SESAENHSYAK	[R].SESAENHSYAK.[H]	1xTMT6plex [K11]; 1xTMT6plex [N-Term]; 1xPhospho [S3(100)]	1xTMT6plex [K11]; 1xTMT6plex [N-Term]; 1xPhospho [S1(0); S3(100); S8(0); Y9(0)]	Q80TH2 1xPhospho [S1013(100)]	Q80TH2 1xPhospho [S1011(0); S1013(100); S1018(0); Y1019(0)]	0.00570867	0.000907142	0.753	1	1	10	Q80TH2	Q80TH2	Erbin OS=Mus musculus OX=10090 GN=Erbin PE=1 SV=3	Erbin	Erbin_S1013	YES	Q80TH2	Q80TH2 [1011-1021]	0	1760.83	11	0	1.297	1.336	1.861	0.38	0.42	0.9	0.0844231	0.0179086	0.0102425	0.504085	0.250687	0.0961155	6.25	22.63	4.16	10.394	9.72979	10.3642	1.297	1.496	0.98	1.332	1.242
2862	High	Unambiguous	GHPSAGAEEEGGSDGSAAEAEPR	[R].GHPSAGAEEEGGSDGSAAEAEPR.[A]	1xTMT6plex [N-Term]; 2xPhospho [S13(100); S16(100)]	1xTMT6plex [N-Term]; 2xPhospho [S4(0); S13(100); S16(100)]	Q8JZQ9 2xPhospho [S120(100); S123(100)]	Q8JZQ9 2xPhospho [S111(0); S120(100); S123(100)]	1.12e-09	0	3.837	1	1	17	Q8JZQ9	Q8JZQ9	Eukaryotic translation initiation factor 3 subunit B OS=Mus musculus OX=10090 GN=Eif3b PE=1 SV=1	Eif3b	Eif3b_S120;S123	YES	Q8JZQ9	Q8JZQ9 [108-130]	0	2557.01	23	0	0.873	0.932	0.728	-0.2	-0.1	-0.46	0.445709	0.723627	0.226372	0.968069	0.99264	0.769181	5.47	8.29	6.32	8.10329	7.67172	8.59694	0.811	0.899	0.977	0.873	0.83
934	High	Unambiguous	TINHQMESPGER	[K].TINHQMESPGER.[R]	1xOxidation [M6]; 1xTMT6plex [N-Term]; 1xPhospho [S8(100)]	1xOxidation [M6]; 1xTMT6plex [N-Term]; 1xPhospho [T1(0); S8(100)]	Q3UH68 1xPhospho [S973(100)]	Q3UH68 1xPhospho [T966(0); S973(100)]	8.76e-05	0	1.605	1	1	8	Q3UH68	Q3UH68	LIM and calponin homology domains-containing protein 1 OS=Mus musculus OX=10090 GN=Limch1 PE=1 SV=2	Limch1	Limch1_S973	YES	Q3UH68	Q3UH68 [966-977]	0	1723.77	12	0	0.811	1.01	0.772	-0.3	0.01	-0.37	0.141086	0.913859	0.250331	0.665256	0.997187	0.813634	11.38	14.78	10.12	8.93723	7.7211	9.17468	0.716	0.489	0.852	1.054	0.811
2428	High	Unambiguous	AKPAAQSEEETATSPAASPTPQSAER	[R].AKPAAQSEEETATSPAASPTPQSAER.[S]	1xTMT6plex [K2]; 1xTMT6plex [N-Term]; 1xPhospho [S14(99.9)]	1xTMT6plex [K2]; 1xTMT6plex [N-Term]; 1xPhospho [S7(0); T11(0); T13(0); S14(99.9); S18(0.1); T20(0); S23(0)]	Q8JZQ9 1xPhospho [S75(99.9)]	Q8JZQ9 1xPhospho [S68(0); T72(0); T74(0); S75(99.9); S79(0.1); T81(0); S84(0)]	1.95e-09	0	3.727	1	1	12	Q8JZQ9	Q8JZQ9	Eukaryotic translation initiation factor 3 subunit B OS=Mus musculus OX=10090 GN=Eif3b PE=1 SV=1	Eif3b	Eif3b_S75	YES	Q8JZQ9	Q8JZQ9 [62-87]	0	3150.54	26	0	0.514	0.682	0.761	-0.96	-0.55	-0.39	1.94e-06	0.0175723	0.225579	9.14e-05	0.249187	0.768365	1.22	18.94	4.84	8.3672	7.91886	8.34518	0.498	0.784	0.85	0.498	0.514
1322	High	Unambiguous	VAAAAGSGPSPPCSPGHDR	[R].VAAAAGSGPSPPCSPGHDR.[E]	1xCarbamidomethyl [C13]; 1xTMT6plex [N-Term]; 1xPhospho [S10(100)]	1xCarbamidomethyl [C13]; 1xTMT6plex [N-Term]; 1xPhospho [S7(0); S10(100); S14(0)]	Q2TBE6 1xPhospho [S47(100)]	Q2TBE6 1xPhospho [S44(0); S47(100); S51(0)]	1.04e-06	0	2.483	1	1	4	Q2TBE6	Q2TBE6	Phosphatidylinositol 4-kinase type 2-alpha OS=Mus musculus OX=10090 GN=Pi4k2a PE=1 SV=1	Pi4k2a	Pi4k2a_S47	YES	Q2TBE6	Q2TBE6 [38-56]	0	2099.95	19	0	0.916	0.907	1.06	-0.13	-0.14	0.08	0.500264	0.559248	0.943188	0.979638	0.982767	0.999899	13.12	3.41	8.72	8.38176	7.86779	8.40049	0.872	0.962	0.724	1.063
1741	High	Unambiguous	SQSASSIDVSTHAPSEAAAGPGSELGK	[R].SQSASSIDVSTHAPSEAAAGPGSELGK.[G]	1xTMT6plex [K27]; 1xTMT6plex [N-Term]; 1xPhospho [S3(88.6)]	1xTMT6plex [K27]; 1xTMT6plex [N-Term]; 1xPhospho [S1(11.2); S3(88.6); S5(0.2); S6(0); S10(0); T11(0); S15(0); S23(0)]	Q8CDA1 1xPhospho [S908(88.6)]	Q8CDA1 1xPhospho [S906(11.2); S908(88.6); S910(0.2); S911(0); S915(0); T916(0); S920(0); S928(0)]	5.51e-05	0	1.697	1	1	14	Q8CDA1	Q8CDA1	Phosphatidylinositide phosphatase SAC2 OS=Mus musculus OX=10090 GN=Inpp5f PE=1 SV=1	Inpp5f	Inpp5f_S908	YES	Q8CDA1	Q8CDA1 [906-932]	0	3079.5	27	0	1.047	1.031	1.162	0.07	0.04	0.22	0.707763	0.91446	0.64079	0.989834	0.997187	0.998116	20.07	20.19	39.01	5.67209	5.21592	5.39683	1.143	0.958	1.234		0.825
2268	High	Unambiguous	EGTLSSPALHGSVLEGAGHAEGDR	[R].EGTLSSPALHGSVLEGAGHAEGDR.[H]	1xTMT6plex [N-Term]; 1xPhospho [S/T]	1xTMT6plex [N-Term]; 1xPhospho [T3(5.5); S5(47.3); S6(47.3); S12(0)]	Q62431 1xPhospho [S/T]	Q62431 1xPhospho [T99(5.5); S101(47.3); S102(47.3); S108(0)]	7.9e-07	0	2.538	1	1	7	Q62431	Q62431	AT-rich interactive domain-containing protein 3A OS=Mus musculus OX=10090 GN=Arid3a PE=1 SV=1	Arid3a	Arid3a_[S101/S102]	YES	Q62431	Q62431 [97-120]	0	2656.26	24	0	1.003	0.873	0.915	0	-0.2	-0.13	0.913062	0.476255	0.696201	0.999853	0.965259	0.998116	7.58	19.19	15.13	7.89596	7.58332	7.87537	1.378	1.016	0.914		0.989
1725	High	Unambiguous	SQDVAISPQQQQCSK	[K].SQDVAISPQQQQCSK.[S]	1xCarbamidomethyl [C13]; 1xTMT6plex [K15]; 1xTMT6plex [N-Term]; 1xPhospho [S7(100)]	1xCarbamidomethyl [C13]; 1xTMT6plex [K15]; 1xTMT6plex [N-Term]; 1xPhospho [S1(0); S7(100); S14(0)]	Q8K2D3 1xPhospho [S131(100)]	Q8K2D3 1xPhospho [S125(0); S131(100); S138(0)]	0.000229539	0	1.413	1	1	7	Q8K2D3	Q8K2D3	Enhancer of mRNA-decapping protein 3 OS=Mus musculus OX=10090 GN=Edc3 PE=1 SV=1	Edc3	Edc3_S131	YES	Q8K2D3	Q8K2D3 [125-139]	0	2242.09	15	0	0.893	1.144	1.032	-0.16	0.19	0.05	0.443336	0.305266	0.953382	0.968069	0.897259	0.999899	1.86	2.39	16.4	9.47958	8.67207	9.38974	0.868	0.893	1.081	0.891	0.907
1980	High	Unambiguous	SMLAISGHLDSDDDSGSGSLVGIDNK	[R].SMLAISGHLDSDDDSGSGSLVGIDNK.[I]	1xTMT6plex [K26]; 1xTMT6plex [N-Term]; 1xPhospho [S11(100)]	1xTMT6plex [K26]; 1xTMT6plex [N-Term]; 1xPhospho [S1(0); S6(0); S11(100); S15(0); S17(0); S19(0)]	Q9EQN3 1xPhospho [S298(100)]	Q9EQN3 1xPhospho [S288(0); S293(0); S298(100); S302(0); S304(0); S306(0)]	0.000116663	0	1.548	1	1	4	Q9EQN3	Q9EQN3	TSC22 domain family protein 4 OS=Mus musculus OX=10090 GN=Tsc22d4 PE=1 SV=2	Tsc22d4	Tsc22d4_S298	YES	Q9EQN3	Q9EQN3 [288-313]	0	3128.49	26	0	0.989	1.129	1.001	-0.02	0.17	0	0.856785	0.406888	0.990452	0.999182	0.940996	0.999899	7.63	18.24	25.1	6.93197	6.46841	6.84557	1.099	0.938	0.939		1.042
2401	High	Unambiguous	ALEEALSIQASPSSPPAAFGSPEGVGGHLR	[K].ALEEALSIQASPSSPPAAFGSPEGVGGHLR.[K]	1xTMT6plex [N-Term]; 1xPhospho [S]	1xTMT6plex [N-Term]; 1xPhospho [S7(0); S11(0); S13(49.7); S14(49.7); S21(0.6)]	Q9WUU8 1xPhospho [S]	Q9WUU8 1xPhospho [S441(0); S445(0); S447(49.7); S448(49.7); S455(0.6)]	0.000183278	0	1.458	1	1	7	Q9WUU8	Q9WUU8	TNFAIP3-interacting protein 1 OS=Mus musculus OX=10090 GN=Tnip1 PE=1 SV=1	Tnip1	Tnip1_S448	YES	Q9WUU8	Q9WUU8 [435-464]	0	3241.61	30	0	0.77	0.859	1.008	-0.38	-0.22	0.01	0.269055	0.485839	0.97033	0.84586	0.965376	0.999899	4.97	8.39	38.94	4.8955	4.82892	4.83749	0.701	0.874	0.753	0.788
658	High	Unambiguous	HIVNHDDVFEESEELSSDEEMK	[K].HIVNHDDVFEESEELSSDEEMK.[M]	1xOxidation [M21]; 1xTMT6plex [K22]; 1xTMT6plex [N-Term]; 2xPhospho [S16(100); S17(100)]	1xOxidation [M21]; 1xTMT6plex [K22]; 1xTMT6plex [N-Term]; 2xPhospho [S12(0); S16(100); S17(100)]	Q80TH2 2xPhospho [S599(100); S600(100)]	Q80TH2 2xPhospho [S595(0); S599(100); S600(100)]	8.85e-05	0	1.603	1	1	8	Q80TH2	Q80TH2	Erbin OS=Mus musculus OX=10090 GN=Erbin PE=1 SV=3	Erbin	Erbin_S599;S600	YES	Q80TH2	Q80TH2 [584-605]	0	3252.37	22	0	1.052	1.014	1.019	0.07	0.02	0.03	0.750792	0.935787	0.966395	0.997986	0.997187	0.999899	6.04	7.88	9.24	8.25073	8.10324	8.54706	1.067	0.981	1.285	1.037
4835	High	Unambiguous	ISYTPPESPVASHR	[R].ISYTPPESPVASHR.[S]	1xTMT6plex [N-Term]; 2xPhospho [S8(100); Y/T/S]	1xTMT6plex [N-Term]; 2xPhospho [S2(2.9); Y3(48.6); T4(48.6); S8(100); S12(0)]	P97360 2xPhospho [S22(100); Y/T/S]	P97360 2xPhospho [S16(2.9); Y17(48.6); T18(48.6); S22(100); S26(0)]	0.0097965	0.00104172	0.647	1	1	10	P97360	P97360	Transcription factor ETV6 OS=Mus musculus OX=10090 GN=Etv6 PE=1 SV=1	Etv6	Etv6_S22;T18	YES	P97360	P97360 [15-28]	0	1929.87	14	0	0.925	0.945	0.751	-0.11	-0.08	-0.41	0.7672	0.788191	0.281311	0.997986	0.994856	0.854272	10.34	13.82	11.31	6.70036	6.62321	7.03152	0.697		1.045	0.895	0.957
508	High	Unambiguous	KLEKEEEEGISQESSEEEQ	[K].KLEKEEEEGISQESSEEEQ.[-]	2xTMT6plex [K1; K4]; 1xTMT6plex [N-Term]; 2xPhospho [S14(99.9); S15(100)]	2xTMT6plex [K1; K4]; 1xTMT6plex [N-Term]; 2xPhospho [S11(0.1); S14(99.9); S15(100)]	P17095 2xPhospho [S102(99.9); S103(100)]	P17095 2xPhospho [S99(0.1); S102(99.9); S103(100)]	2.88e-05	0	1.826	1	1	63	P17095	P17095	High mobility group protein HMG-I/HMG-Y OS=Mus musculus OX=10090 GN=Hmga1 PE=1 SV=4	Hmga1	Hmga1_S102;S103	YES	P17095	P17095 [89-107]	2	3084.42	19	0	0.929	1.103	1.033	-0.11	0.14	0.05	0.562993	0.380486	0.994156	0.98968	0.93353	0.999899	13.44	7.45	29.83	11.5155	11.2388	11.5975	0.873	1.027	0.751	0.929	1.138
2913	High	Unambiguous	FSSLDLEEDSEVFK	[R].FSSLDLEEDSEVFK.[M]	1xTMT6plex [K14]; 1xTMT6plex [N-Term]; 1xPhospho [S3(95.9)]	1xTMT6plex [K14]; 1xTMT6plex [N-Term]; 1xPhospho [S2(4.1); S3(95.9); S10(0)]	Q8R1G6 1xPhospho [S210(95.9)]	Q8R1G6 1xPhospho [S209(4.1); S210(95.9); S217(0)]	1.8e-06	0	2.375	1	1	10	Q8R1G6	Q8R1G6	PDZ and LIM domain protein 2 OS=Mus musculus OX=10090 GN=Pdlim2 PE=1 SV=1	Pdlim2	Pdlim2_S210	YES	Q8R1G6	Q8R1G6 [208-221]	0	2183.06	14	0	0.933	0.935	0.802	-0.1	-0.1	-0.32	0.773037	0.733741	0.37958	0.998955	0.99264	0.9398	15.27	13.49	14.69	7.21917	6.65249	7.28077	0.864	0.933	0.823	1.066	1.188
1799	High	Unambiguous	SSGSPYGGGYGSGGGSGGYGSR	[R].SSGSPYGGGYGSGGGSGGYGSR.[R]	1xTMT6plex [N-Term]; 1xPhospho [S4(99.6)]	1xTMT6plex [N-Term]; 1xPhospho [S1(0); S2(0); S4(99.6); Y6(0.4); Y10(0); S12(0); S16(0); Y19(0); S21(0)]	Q8BG05 1xPhospho [S359(99.6)]	Q8BG05 1xPhospho [S356(0); S357(0); S359(99.6); Y361(0.4); Y365(0); S367(0); S371(0); Y374(0); S376(0)]	1.24e-13	0	5.641	1	1	17	Q8BG05	Q8BG05	Heterogeneous nuclear ribonucleoprotein A3 OS=Mus musculus OX=10090 GN=Hnrnpa3 PE=1 SV=1	Hnrnpa3	Hnrnpa3_S359	YES	Q8BG05	Q8BG05 [356-377]	0	2219.92	22	0	0.837	1.106	0.901	-0.26	0.15	-0.15	0.235534	0.452711	0.571841	0.81305	0.964129	0.996923	5.44	33.36	11.43	9.72843	8.92896	9.78267	0.802	0.837	0.776	0.881	1.011
1306	High	Unambiguous	YAHQQPPSPLPVYSSSAK	[R].YAHQQPPSPLPVYSSSAK.[N]	1xTMT6plex [K18]; 1xTMT6plex [N-Term]; 1xPhospho [S8(100)]	1xTMT6plex [K18]; 1xTMT6plex [N-Term]; 1xPhospho [Y1(0); S8(100); Y13(0); S14(0); S15(0); S16(0)]	Q8VI36 1xPhospho [S83(100)]	Q8VI36 1xPhospho [Y76(0); S83(100); Y88(0); S89(0); S90(0); S91(0)]	3.33e-07	0	2.709	1	1	8	Q8VI36	Q8VI36	Paxillin OS=Mus musculus OX=10090 GN=Pxn PE=1 SV=1	Pxn	Pxn_S83	YES	Q8VI36	Q8VI36 [76-93]	0	2495.27	18	0	0.983	0.784	0.846	-0.03	-0.35	-0.24	0.849047	0.118003	0.487751	0.999182	0.681044	0.984677	13.79	0.83	44.86	8.44667	8.16088	8.53799	0.796	0.983	1.077	1.019	0.819
181	High	Unambiguous	LTVENSPKQETGITEGQGPVGEEEEK	[K].LTVENSPKQETGITEGQGPVGEEEEK.[K]	2xTMT6plex [K8; K26]; 1xTMT6plex [N-Term]; 1xPhospho [T2(92.1)]	2xTMT6plex [K8; K26]; 1xTMT6plex [N-Term]; 1xPhospho [T2(92.1); S6(7.9); T11(0); T14(0)]	Q9CQJ6 1xPhospho [T69(92.1)]	Q9CQJ6 1xPhospho [T69(92.1); S73(7.9); T78(0); T81(0)]	8.02e-06	0	2.079	1	1	10	Q9CQJ6	Q9CQJ6	Density-regulated protein OS=Mus musculus OX=10090 GN=Denr PE=1 SV=1	Denr	Denr_T69	YES	Q9CQJ6	Q9CQJ6 [68-93]	1	3552.79	26	0	0.819	1.05	1.016	-0.29	0.07	0.02	0.260284	0.635473	0.971982	0.837622	0.99264	0.999899	14.02	6.07	10.11	8.13083	7.42543	8.00394	0.703	0.819	0.967	0.806	1.01
2426	High	Unambiguous	AKGGEEEEDTSDSDSDGLTLK	[K].AKGGEEEEDTSDSDSDGLTLK.[E]	2xTMT6plex [K2; K21]; 1xTMT6plex [N-Term]; 3xPhospho [T10(100); S11(100); S13(98.9)]	2xTMT6plex [K2; K21]; 1xTMT6plex [N-Term]; 3xPhospho [T10(100); S11(100); S13(98.9); S15(1.1); T19(0)]	Q8C9B9 3xPhospho [T148(100); S149(100); S151(98.9)]	Q8C9B9 3xPhospho [T148(100); S149(100); S151(98.9); S153(1.1); T157(0)]	7.88e-05	0	1.626	1	1	7	Q8C9B9	Q8C9B9	Death-inducer obliterator 1 OS=Mus musculus OX=10090 GN=Dido1 PE=1 SV=4	Dido1	Dido1_T148;S149;S151	YES	Q8C9B9	Q8C9B9 [139-159]	1	3110.33	21	0	0.828	1.011	1.193	-0.27	0.02	0.25	0.269594	0.840929	0.601218	0.845904	0.995193	0.996923	10.99	14.71	16.92	7.99463	7.59527	8.0826	0.672	0.898	0.937	0.763
1309	High	Unambiguous	VMHTQCHSTPDSAEDVR	[R].VMHTQCHSTPDSAEDVR.[K]	1xCarbamidomethyl [C6]; 1xOxidation [M2]; 1xTMT6plex [N-Term]; 1xPhospho [S12(100)]	1xCarbamidomethyl [C6]; 1xOxidation [M2]; 1xTMT6plex [N-Term]; 1xPhospho [T4(0); S8(0); T9(0); S12(100)]	P29699 1xPhospho [S138(100)]	P29699 1xPhospho [T130(0); S134(0); T135(0); S138(100)]	8.19e-06	0	2.075	1	1	58	P29699	P29699	Alpha-2-HS-glycoprotein OS=Mus musculus OX=10090 GN=Ahsg PE=1 SV=1	Ahsg	Ahsg_S138	YES	P29699	P29699 [127-143]	0	2294.97	17	0	0.815	1.267	0.771	-0.29	0.34	-0.38	0.138406	0.0369736	0.20538	0.659164	0.384696	0.73676	6.45	28.27	7.82	11.1437	10.9069	10.9034	0.665	0.829	0.762	0.815	1.06
2693	High	Unambiguous	AQLYLAPTSSPPNEGLDSLAQELSR	[R].AQLYLAPTSSPPNEGLDSLAQELSR.[S]	1xTMT6plex [N-Term]; 1xPhospho [S10(99.2)]	1xTMT6plex [N-Term]; 1xPhospho [Y4(0); T8(0); S9(0.8); S10(99.2); S18(0); S24(0)]	Q8CB62 1xPhospho [S63(99.2)]	Q8CB62 1xPhospho [Y57(0); T61(0); S62(0.8); S63(99.2); S71(0); S77(0)]	2.35e-06	0	2.322	1	1	7	Q8CB62	Q8CB62	Centrobin OS=Mus musculus OX=10090 GN=Cntrob PE=2 SV=2	Cntrob	Cntrob_S63	YES	Q8CB62	Q8CB62 [54-78]	0	2966.47	25	0	1.133	1.115	1.148	0.18	0.16	0.2	0.317487	0.466079	0.638575	0.893122	0.964738	0.998116	13.25	14.82	26.73	7.21237	6.34696	7.33718	0.831	1.133	0.889	1.234	1.158
2734	High	Unambiguous	AQSVSPVQATPSGGSAQLLPGK	[K].AQSVSPVQATPSGGSAQLLPGK.[V]	1xTMT6plex [K22]; 1xTMT6plex [N-Term]; 1xPhospho [S5(90.4)]	1xTMT6plex [K22]; 1xTMT6plex [N-Term]; 1xPhospho [S3(9.6); S5(90.4); T10(0); S12(0); S15(0)]	Q924A2 1xPhospho [S1809(90.4)]	Q924A2 1xPhospho [S1807(9.6); S1809(90.4); T1814(0); S1816(0); S1819(0)]	3.7e-05	0	1.776	1	1	4	Q924A2	Q924A2	Protein capicua homolog OS=Mus musculus OX=10090 GN=Cic PE=1 SV=2	Cic	Cic_S1809	YES	Q924A2	Q924A2 [1805-1826]	0	2618.4	22	0	0.793	0.85	0.868	-0.33	-0.23	-0.2	0.193902	0.345353	0.591993	0.759716	0.920448	0.996923	7.7	15.91	14.26	6.5914	6.60307	6.78649	0.912	0.699		0.83	0.758
1860	High	Unambiguous	SKSEDMDSVESK	[R].SKSEDMDSVESK.[R]	1xOxidation [M6]; 2xTMT6plex [K2; K12]; 1xTMT6plex [N-Term]; 1xPhospho [S3(100)]	1xOxidation [M6]; 2xTMT6plex [K2; K12]; 1xTMT6plex [N-Term]; 1xPhospho [S1(0); S3(100); S8(0); S11(0)]	Q7TT18 1xPhospho [S593(100)]	Q7TT18 1xPhospho [S591(0); S593(100); S598(0); S601(0)]	0.000181451	0	1.46	1	1	9	Q7TT18	Q7TT18	Activating transcription factor 7-interacting protein 1 OS=Mus musculus OX=10090 GN=Atf7ip PE=1 SV=1	Atf7ip	Atf7ip_S593	YES	Q7TT18	Q7TT18 [591-602]	1	2125.03	12	0	0.982	0.874	0.977	-0.03	-0.2	-0.03	0.841886	0.241993	0.79649	0.999182	0.85144	0.998116	4.96	30.28	13.78	9.91692	10.0095	9.85284	0.982	0.956	1.077	0.948	1.023
1541	High	Unambiguous	SDSVLPASHGHLPQAGSLER	[R].SDSVLPASHGHLPQAGSLER.[N]	1xTMT6plex [N-Term]; 1xPhospho [S17(100)]	1xTMT6plex [N-Term]; 1xPhospho [S1(0); S3(0); S8(0); S17(100)]	Q9JM52 1xPhospho [S729(100)]	Q9JM52 1xPhospho [S713(0); S715(0); S720(0); S729(100)]	3.15e-06	0	2.264	1	1	5	Q9JM52	Q9JM52	Misshapen-like kinase 1 OS=Mus musculus OX=10090 GN=Mink1 PE=1 SV=3	Mink1	Mink1_S729	YES	Q9JM52	Q9JM52 [713-732]	0	2367.17	20	0	0.846	0.997	0.707	-0.24	0	-0.5	0.351888	0.909987	0.228932	0.911395	0.997187	0.772354	4.67	14.61	30.44	7.85425	7.55459	7.75689	0.809	0.873	0.958	0.742	0.846
1125	High	Unambiguous	TASPPGPPQYSK	[K].TASPPGPPQYSK.[R]	1xTMT6plex [K12]; 1xTMT6plex [N-Term]; 1xPhospho [T1(95.7)]	1xTMT6plex [K12]; 1xTMT6plex [N-Term]; 1xPhospho [T1(95.7); S3(4.4); Y10(0); S11(0)]	O35126 1xPhospho [T615(95.7)]	O35126 1xPhospho [T615(95.7); S617(4.4); Y624(0); S625(0)]	8.54e-05	0	1.61	1	1	7	O35126	O35126	Atrophin-1 OS=Mus musculus OX=10090 GN=Atn1 PE=1 SV=1	Atn1	Atn1_T615	YES	O35126	O35126 [615-626]	0	1767.91	12	0	0.976	0.996	1.078	-0.04	-0.01	0.11	0.881855	0.969093	0.914331	0.999182	0.998927	0.999462	8.01	3.34	23.14	8.67871	8.46319	8.20004	1.068	0.994		0.852	0.958
3270	High	Unambiguous	HNQDSQHCSLSGDEEDELFK	[R].HNQDSQHCSLSGDEEDELFK.[G]	1xCarbamidomethyl [C8]; 1xTMT6plex [K20]; 1xTMT6plex [N-Term]; 1xPhospho [S11(90.2)]	1xCarbamidomethyl [C8]; 1xTMT6plex [K20]; 1xTMT6plex [N-Term]; 1xPhospho [S5(0.1); S9(9.7); S11(90.2)]	Q6P9Q6 1xPhospho [S1159(100)]	Q6P9Q6 1xPhospho [S1153(0); S1157(0); S1159(100)]	0.000790718	0.000209709	1.162	1	1	8	Q6P9Q6	Q6P9Q6	FK506-binding protein 15 OS=Mus musculus OX=10090 GN=Fkbp15 PE=1 SV=2	Fkbp15	Fkbp15_S1159	YES	Q6P9Q6	Q6P9Q6 [1149-1168]	0	2913.28	20	0	0.903	0.958	0.916	-0.15	-0.06	-0.13	0.514108	0.802418	0.643117	0.980365	0.994856	0.998116	4.48	15.7	32.45	8.23098	8.06686	8.38573		0.868	0.975	0.934	0.873
3267	High	Unambiguous	RLSLTPDPEKGEPPALDPESQGGEAQPPECK	[R].RLSLTPDPEKGEPPALDPESQGGEAQPPECK.[Q]	1xCarbamidomethyl [C30]; 2xTMT6plex [K10; K31]; 1xTMT6plex [N-Term]; 1xPhospho [S3(83.7)]	1xCarbamidomethyl [C30]; 2xTMT6plex [K10; K31]; 1xTMT6plex [N-Term]; 1xPhospho [S3(83.7); T5(16.3); S20(0)]	Q6P9Q6 1xPhospho [S1091(83.7)]	Q6P9Q6 1xPhospho [S1091(83.7); T1093(16.3); S1108(0)]	0.0013124	0.000209709	1.057	1	1	6	Q6P9Q6	Q6P9Q6	FK506-binding protein 15 OS=Mus musculus OX=10090 GN=Fkbp15 PE=1 SV=2	Fkbp15	Fkbp15_S1091	NO	Q6P9Q6	Q6P9Q6 [1089-1119]	2	4097.05	31	0	0.91	0.985	0.897	-0.14	-0.02	-0.16	0.633217	0.96781	0.702393	0.98968	0.998927	0.998116	10.65	10.99	28.21	7.32986	7.08959	7.64336	0.821	0.846	0.979	1.032
1465	High	Unambiguous	SAAVSASSPEAK	[R].SAAVSASSPEAK.[D]	1xTMT6plex [K12]; 1xTMT6plex [N-Term]; 1xPhospho [S8(99.9)]	1xTMT6plex [K12]; 1xTMT6plex [N-Term]; 1xPhospho [S1(0); S5(0); S7(0.1); S8(99.9)]	P54276 1xPhospho [S63(99.9)]	P54276 1xPhospho [S56(0); S60(0); S62(0.1); S63(99.9)]	1.81e-06	0	2.374	1	1	12	P54276	P54276	DNA mismatch repair protein Msh6 OS=Mus musculus OX=10090 GN=Msh6 PE=1 SV=3	Msh6	Msh6_S63	NO	P54276	P54276 [56-67]	0	1642.85	12	0	1.011	0.957	0.927	0.02	-0.06	-0.11	0.955243	0.751184	0.626713	0.99999	0.99264	0.997562	4.54	13.39	17.69	9.72127	9.57743	9.61526	0.923	1.034	1.011	1.042	0.836
1784	High	Unambiguous	SPQPVCSPAGSDGTPK	[R].SPQPVCSPAGSDGTPK.[G]	1xCarbamidomethyl [C6]; 1xTMT6plex [K16]; 1xTMT6plex [N-Term]; 1xPhospho [S7(100)]	1xCarbamidomethyl [C6]; 1xTMT6plex [K16]; 1xTMT6plex [N-Term]; 1xPhospho [S1(0); S7(100); S11(0); T14(0)]	Q6KCD5 1xPhospho [S280(100)]	Q6KCD5 1xPhospho [S274(0); S280(100); S284(0); T287(0)]	2.71e-06	0	2.294	1	1	5	Q6KCD5	Q6KCD5	Nipped-B-like protein OS=Mus musculus OX=10090 GN=Nipbl PE=1 SV=1	Nipbl	Nipbl_S280	YES	Q6KCD5	Q6KCD5 [274-289]	0	2123.02	16	0	0.949	0.926	1.118	-0.08	-0.11	0.16	0.718521	0.635115	0.812187	0.990459	0.99264	0.998116	3.81	14.45	19.29	8.64733	8.19792	8.20881	0.996		0.823	0.956	0.942
1585	High	Unambiguous	RNSSSPVSPASVPGQR	[R].RNSSSPVSPASVPGQR.[R]	1xTMT6plex [N-Term]; 2xPhospho [S3(92); S5(92)]	1xTMT6plex [N-Term]; 2xPhospho [S3(92); S4(16.1); S5(92); S8(0); S11(0)]	Q8K3X4 2xPhospho [S636(92); S638(92)]	Q8K3X4 2xPhospho [S636(92); S637(16.1); S638(92); S641(0); S644(0)]	0.000457487	0	1.274	1	1	6	Q8K3X4	Q8K3X4	Interferon regulatory factor 2-binding protein-like OS=Mus musculus OX=10090 GN=Irf2bpl PE=1 SV=1	Irf2bpl	Irf2bpl_S636;S638	NO	Q8K3X4	Q8K3X4 [634-649]	1	2014.93	16	0	0.999	1.023	0.925	0	0.03	-0.11	0.846229	0.871525	0.709509	0.999182	0.996046	0.998116	3.23	16.61	25.25	7.56834	7.29186	7.54921	1.021	1.021	0.843	0.825	0.999
2700	High	Unambiguous	ASLQSGQEGPGDSPGSQFSK	[K].ASLQSGQEGPGDSPGSQFSK.[W]	1xTMT6plex [K20]; 1xTMT6plex [N-Term]; 1xPhospho [S13(100)]	1xTMT6plex [K20]; 1xTMT6plex [N-Term]; 1xPhospho [S2(0); S5(0); S13(100); S16(0); S19(0)]	Q9R1E0 1xPhospho [S284(100)]	Q9R1E0 1xPhospho [S273(0); S276(0); S284(100); S287(0); S290(0)]	2.07e-09	0	3.715	1	1	10	Q9R1E0	Q9R1E0	Forkhead box protein O1 OS=Mus musculus OX=10090 GN=Foxo1 PE=1 SV=2	Foxo1	Foxo1_S284	NO	Q9R1E0	Q9R1E0 [272-291]	0	2502.19	20	0	0.863	1.012	0.977	-0.21	0.02	-0.03	0.304222	0.954734	0.846738	0.880241	0.997578	0.998116	16.95	11.4	19.42	9.23002	8.76785	9.15735	0.836	0.863	0.616	1.066	0.996
1184	High	Unambiguous	TSSLTHSEEK	[R].TSSLTHSEEK.[S]	1xTMT6plex [K10]; 1xTMT6plex [N-Term]; 1xPhospho [S/T]	1xTMT6plex [K10]; 1xTMT6plex [N-Term]; 1xPhospho [T1(0); S2(0.1); S3(49.9); T5(49.9); S7(0)]	Q9CT10 1xPhospho [S/T]	Q9CT10 1xPhospho [T56(0); S57(0.1); S58(49.9); T60(49.9); S62(0)]	4.71e-05	0	1.728	1	1	10	Q9CT10	Q9CT10	Ran-binding protein 3 OS=Mus musculus OX=10090 GN=Ranbp3 PE=1 SV=2	Ranbp3	Ranbp3_[S58/T60]	YES	Q9CT10	Q9CT10 [56-65]	0	1656.82	10	0	0.969	1.006	0.963	-0.05	0.01	-0.05	0.772054	0.900042	0.764582	0.998955	0.997038	0.998116	5.18	13.26	22.75	10.6068	9.80429	10.753	0.969	1.005	0.999	0.841	0.865
1089	High	Unambiguous	SSSQSSPNSPK	[R].SSSQSSPNSPK.[K]	1xTMT6plex [K11]; 1xTMT6plex [N-Term]; 1xPhospho [S9(100)]	1xTMT6plex [K11]; 1xTMT6plex [N-Term]; 1xPhospho [S1(0); S2(0); S3(0); S5(0); S6(0); S9(100)]	Q9CYA6 1xPhospho [S429(100)]	Q9CYA6 1xPhospho [S421(0); S422(0); S423(0); S425(0); S426(0); S429(100)]	4.16e-06	0	2.209	1	1	12	Q9CYA6	Q9CYA6	Zinc finger CCHC domain-containing protein 8 OS=Mus musculus OX=10090 GN=Zcchc8 PE=1 SV=3	Zcchc8	Zcchc8_S429	YES	Q9CYA6	Q9CYA6 [421-431]	0	1643.8	11	0	0.771	1.024	1.409	-0.38	0.03	0.5	0.0615043	0.817494	0.174243	0.416661	0.994856	0.679191	5.93	15.69	61.24	10.5461	10.0757	10.0342	0.71	0.874	0.814	0.73
651	High	Unambiguous	HGSGPNIILTGDSSPGFSK	[R].HGSGPNIILTGDSSPGFSK.[E]	1xTMT6plex [K19]; 1xTMT6plex [N-Term]; 1xPhospho [S14(99.8)]	1xTMT6plex [K19]; 1xTMT6plex [N-Term]; 1xPhospho [S3(0); T10(0); S13(0.2); S14(99.8); S18(0)]	Q3U182 1xPhospho [S623(99.8)]	Q3U182 1xPhospho [S612(0); T619(0); S622(0.2); S623(99.8); S627(0)]	1.32e-07	0	2.893	1	1	14	Q3U182	Q3U182	CREB-regulated transcription coactivator 2 OS=Mus musculus OX=10090 GN=Crtc2 PE=1 SV=2	Crtc2	Crtc2_S612	YES	Q3U182	Q3U182 [610-628]	0	2409.22	19	0	1.468	1.637	1.507	0.55	0.71	0.59	0.0070039	0.000384957	0.154257	0.0893232	0.0153197	0.633105	38.92	54.89	13.28	9.64115	9.07441	9.45059	1.853	1.468	1.048	1.007	1.54
2742	High	Unambiguous	ASESDTEEFYDAPEDVHLGTGYPVGSPGK	[M].ASESDTEEFYDAPEDVHLGTGYPVGSPGK.[V]	1xAcetyl [N-Term]; 1xTMT6plex [K29]; 1xTMT6plex [N-Term]; 1xPhospho [S/T/Y]	1xAcetyl [N-Term]; 1xTMT6plex [K29]; 1xTMT6plex [N-Term]; 1xPhospho [S2(49.9); S4(49.9); T6(0.2); Y10(0); T20(0); Y22(0); S26(0)]	Q6NVE8 1xAcetyl [N-Term]; 1xPhospho [S/T/Y]	Q6NVE8 1xAcetyl [N-Term]; 1xPhospho [S3(49.9); S5(49.9); T7(0.2); Y11(0); T21(0); Y23(0); S27(0)]	1.04e-06	0	2.484	1	1	17	Q6NVE8	Q6NVE8	WD repeat-containing protein 44 OS=Mus musculus OX=10090 GN=Wdr44 PE=1 SV=1	Wdr44	Wdr44_[S3/S5]	YES	Q6NVE8	Q6NVE8 [2-30]	0	3634.65	29	0	1.167	0.976	0.919	0.22	-0.04	-0.12	0.249531	0.977882	0.728648	0.830491	0.999661	0.998116	2.08	17.16	47.97	6.73742	6.20555	7.08108	1.151	1.167	1.176	1.262	0.845
3073	High	Unambiguous	GCVASPVEGGR	[R].GCVASPVEGGR.[S]	1xCarbamidomethyl [C2]; 1xTMT6plex [N-Term]; 1xPhospho [S5(100)]	1xCarbamidomethyl [C2]; 1xTMT6plex [N-Term]; 1xPhospho [S5(100)]	Q91YE8 1xPhospho [S300(100)]	Q91YE8 1xPhospho [S300(100)]	0.00123288	0.000209709	1.07	1	1	6	Q91YE8	Q91YE8	Synaptopodin-2 OS=Mus musculus OX=10090 GN=Synpo2 PE=1 SV=2	Synpo2	Synpo2_S300	YES	Q91YE8	Q91YE8 [296-306]	0	1397.64	11	0	0.905	1.129	0.724	-0.14	0.18	-0.47	0.503714	0.333933	0.166602	0.979989	0.911675	0.663354	7.07	8.65	22.03	9.18747	8.29008	9.21162	0.904	1.009	0.788		0.907
227	High	Unambiguous	QPSIELPSMAVASTK	[R].QPSIELPSMAVASTK.[T]	1xTMT6plex [K15]; 1xTMT6plex [N-Term]; 1xPhospho [S3(100)]	1xTMT6plex [K15]; 1xTMT6plex [N-Term]; 1xPhospho [S3(100); S8(0); S13(0); T14(0)]	P19973 1xPhospho [S243(100)]	P19973 1xPhospho [S243(100); S248(0); S253(0); T254(0)]	6.59e-06	0	2.118	1	1	51	P19973	P19973	Lymphocyte-specific protein 1 OS=Mus musculus OX=10090 GN=Lsp1 PE=1 SV=2	Lsp1	Lsp1_S243	NO	P19973	P19973 [241-255]	0	2097.11	15	0	0.901	0.999	1.164	-0.15	0	0.22	0.47456	0.989612	0.660134	0.974021	0.999874	0.998116	9.68	5.63	34.32	9.59526	9.28216	9.42647	0.883	0.901	0.816	1.093	0.974
4078	High	Unambiguous	LSTSPATRDEAASPGAK	[R].LSTSPATRDEAASPGAK.[D]	1xTMT6plex [K17]; 1xTMT6plex [N-Term]; 2xPhospho [S4(92.2); S13(100)]	1xTMT6plex [K17]; 1xTMT6plex [N-Term]; 2xPhospho [S2(0.6); T3(7.1); S4(92.2); T7(0.1); S13(100)]	Q9EPQ8 2xPhospho [S603(92.2); S612(100)]	Q9EPQ8 2xPhospho [S601(0.6); T602(7.1); S603(92.2); T606(0.1); S612(100)]	0.0034791	0.000677187	0.854	1	1	11	Q9EPQ8	Q9EPQ8	Transcription factor 20 OS=Mus musculus OX=10090 GN=Tcf20 PE=1 SV=3	Tcf20	Tcf20_S612;S603	YES	Q9EPQ8	Q9EPQ8 [600-616]	1	2277.09	17	0	0.983	1.06	1.374	-0.02	0.08	0.46	0.911985	0.622115	0.221964	0.999853	0.992453	0.759978	9.98	11.51	18.86	9.8317	9.52378	9.77307	0.791	1.015	0.952	1.088
2346	High	Unambiguous	ELLTSDSPPHNDIMSPVDPGVAQPNSR	[K].ELLTSDSPPHNDIMSPVDPGVAQPNSR.[V]	1xTMT6plex [N-Term]; 1xPhospho [S7(96.3)]	1xTMT6plex [N-Term]; 1xPhospho [T4(1.9); S5(1.9); S7(96.3); S15(0); S26(0)]	Q9R1E0 1xPhospho [S467(96.3)]	Q9R1E0 1xPhospho [T464(1.9); S465(1.9); S467(96.3); S475(0); S486(0)]	0.000186053	0	1.455	1	1	10	Q9R1E0	Q9R1E0	Forkhead box protein O1 OS=Mus musculus OX=10090 GN=Foxo1 PE=1 SV=2	Foxo1	Foxo1_S467	YES	Q9R1E0	Q9R1E0 [461-487]	0	3182.5	27	0	0.815	0.96	0.907	-0.29	-0.06	-0.14	0.274315	0.785827	0.725642	0.850451	0.994856	0.998116	2.87	7.21	23.26	6.82174	6.80279	6.76475	0.794		0.789	1.068	0.837
2218	High	Unambiguous	EVIVAAEAEPGDVEMAEAPGSPNHQELGLLGEGEQAHVK	[K].EVIVAAEAEPGDVEMAEAPGSPNHQELGLLGEGEQAHVK.[L]	1xOxidation [M15]; 1xTMT6plex [K39]; 1xTMT6plex [N-Term]; 1xPhospho [S21(100)]	1xOxidation [M15]; 1xTMT6plex [K39]; 1xTMT6plex [N-Term]; 1xPhospho [S21(100)]	Q8CCE9 1xPhospho [S166(100)]	Q8CCE9 1xPhospho [S166(100)]	3.55e-05	0	1.784	1	1	4	Q8CCE9	Q8CCE9	Transcription factor E4F1 OS=Mus musculus OX=10090 GN=E4f1 PE=1 SV=2	E4f1	E4f1_S166	YES	Q8CCE9	Q8CCE9 [146-184]	0	4562.22	39	0	0.861	1.053	1.279	-0.22	0.07	0.35	0.486792	0.712752	0.301628	0.979638	0.99264	0.872479	3.74	15.56	13.87	6.29536	5.87537	6.15912	0.858	0.805	0.863	1.192
4831	High	Unambiguous	SLTGSGSQEDLLLQK	[R].SLTGSGSQEDLLLQK.[S]	1xTMT6plex [K15]; 1xTMT6plex [N-Term]; 1xPhospho [S5(87.8)]	1xTMT6plex [K15]; 1xTMT6plex [N-Term]; 1xPhospho [S1(0.4); T3(5.9); S5(87.8); S7(5.9)]	Q8K389 1xPhospho [S483(87.8)]	Q8K389 1xPhospho [S479(0.4); T481(5.9); S483(87.8); S485(5.9)]	0.00974566	0.00104172	0.648	1	1	10	Q8K389	Q8K389	CDK5 regulatory subunit-associated protein 2 OS=Mus musculus OX=10090 GN=Cdk5rap2 PE=1 SV=3	Cdk5rap2	Cdk5rap2_[S479/T481/S485]	YES	Q8K389	Q8K389 [479-493]	0	2114.11	15	0	0.959	0.884	1.035	-0.06	-0.18	0.05	0.964537	0.592927	0.871655	0.99999	0.983853	0.998362	8.37	11.59	50.43	6.87248	5.95973	6.62716	0.821	0.941	1.059		0.977
1691	High	Unambiguous	RPPESPPIVEEWNSR	[K].RPPESPPIVEEWNSR.[A]	1xTMT6plex [N-Term]; 1xPhospho [S5(100)]	1xTMT6plex [N-Term]; 1xPhospho [S5(100); S14(0)]	Q9CQY2 1xPhospho [S36(100)]	Q9CQY2 1xPhospho [S36(100); S45(0)]	3.57e-05	0	1.783	1	1	7	Q9CQY2	Q9CQY2	RNMT-activating mini protein OS=Mus musculus OX=10090 GN=Fam103a1 PE=3 SV=1	Fam103a1	Fam103a1_S36	YES	Q9CQY2	Q9CQY2 [32-46]	0	2102.03	15	0	0.937	1.143	1.002	-0.09	0.19	0	0.604135	0.329413	0.999082	0.98968	0.909007	0.999899	13.16	4.15	38.19	8.3746	8.23554	7.83289	0.836	1.047	1.032	0.937	0.922
661	High	Unambiguous	HLSSTSDDEPLSSVNHAAK	[R].HLSSTSDDEPLSSVNHAAK.[A]	1xTMT6plex [K19]; 1xTMT6plex [N-Term]; 1xPhospho [S/T]	1xTMT6plex [K19]; 1xTMT6plex [N-Term]; 1xPhospho [S3(32.6); S4(2.1); T5(32.6); S6(32.6); S12(0); S13(0)]	Q9DBC3 1xPhospho [S/T]	Q9DBC3 1xPhospho [S27(32.6); S28(2.1); T29(32.6); S30(32.6); S36(0); S37(0)]	7.55e-07	0	2.547	1	1	15	Q9DBC3	Q9DBC3	Cap-specific mRNA (nucleoside-2'-O-)-methyltransferase 1 OS=Mus musculus OX=10090 GN=Cmtr1 PE=1 SV=1	Cmtr1	Cmtr1_S27	YES	Q9DBC3	Q9DBC3 [25-43]	0	2533.23	19	0	0.901	1.045	0.638	-0.15	0.06	-0.65	0.492604	0.729933	0.0724451	0.979638	0.99264	0.407741	12.6	7.87	17.81	9.06286	8.83794	9.16189	1.001	0.996	0.831	0.481	0.901
2641	High	Unambiguous	CLSDPGPHPEPGEGEPFIPK	[R].CLSDPGPHPEPGEGEPFIPK.[G]	1xCarbamidomethyl [C1]; 1xTMT6plex [K20]; 1xTMT6plex [N-Term]; 1xPhospho [S3(100)]	1xCarbamidomethyl [C1]; 1xTMT6plex [K20]; 1xTMT6plex [N-Term]; 1xPhospho [S3(100)]	Q61165 1xPhospho [S801(100)]	Q61165 1xPhospho [S801(100)]	0.000610979	0	1.215	1	1	4	Q61165	Q61165	Sodium/hydrogen exchanger 1 OS=Mus musculus OX=10090 GN=Slc9a1 PE=1 SV=1	Slc9a1	Slc9a1_S801	YES	Q61165	Q61165 [799-818]	0	2698.3	20	0	1.323	1.456	0.974	0.4	0.54	-0.04	0.0447364	0.0176228	0.910495	0.337008	0.249187	0.999462	16.7	13.24	33.21	7.77258	7.76956	7.83401	1.237		1.044	1.415	1.529
278	High	Unambiguous	RASLEIGESFPEGTK	[R].RASLEIGESFPEGTK.[G]	1xTMT6plex [K15]; 1xTMT6plex [N-Term]; 1xPhospho [S3(100)]	1xTMT6plex [K15]; 1xTMT6plex [N-Term]; 1xPhospho [S3(100); S9(0); T14(0)]	Q9QY06 1xPhospho [S1175(100)]	Q9QY06 1xPhospho [S1175(100); S1181(0); T1186(0)]	8.83e-08	0	2.972	1	1	6	Q9QY06	Q9QY06	Unconventional myosin-IXb OS=Mus musculus OX=10090 GN=Myo9b PE=1 SV=2	Myo9b	Myo9b_S1175	YES	Q9QY06	Q9QY06 [1173-1187]	1	2159.11	15	0	0.847	0.983	0.938	-0.24	-0.03	-0.09	0.362475	0.941957	0.749687	0.921043	0.997187	0.998116	6.43	13.71	23.65	7.6844	7.18289	7.54458	0.847	0.954	1.159	0.796	0.837
3628	High	Unambiguous	TSSPTSLPPLAR	[R].TSSPTSLPPLAR.[S]	1xTMT6plex [N-Term]; 1xPhospho [S3(97)]	1xTMT6plex [N-Term]; 1xPhospho [T1(0); S2(1); S3(97); T5(1); S6(1)]	Q80XI3 1xPhospho [S267(97)]	Q80XI3 1xPhospho [T265(0); S266(1); S267(97); T269(1); S270(1)]	0.00188995	0.000530845	0.981	1	1	7	Q80XI3	Q80XI3	Eukaryotic translation initiation factor 4 gamma 3 OS=Mus musculus OX=10090 GN=Eif4g3 PE=1 SV=2	Eif4g3	Eif4g3_[S267/T269]	YES	Q80XI3	Q80XI3 [265-276]	0	1535.8	12	0	0.856	0.815	1.026	-0.22	-0.3	0.04	0.360428	0.188042	0.966639	0.920813	0.794061	0.999899	6.17	6.91	17.09	8.18339	8.14211	8.40173	0.905	0.856	0.926	0.757	0.84
5257	High	Unambiguous	SGSSPEMK	[R].SGSSPEMK.[D]	1xOxidation [M7]; 1xTMT6plex [K8]; 1xTMT6plex [N-Term]; 1xPhospho [S4(99.8)]	1xOxidation [M7]; 1xTMT6plex [K8]; 1xTMT6plex [N-Term]; 1xPhospho [S1(0); S3(0.2); S4(99.8)]	Q8BTI8 1xPhospho [S1557(99.8)]	Q8BTI8 1xPhospho [S1554(0); S1556(0.2); S1557(99.8)]	0.017255	0.0018007	0.54	1	1	14	Q8BTI8	Q8BTI8	Serine/arginine repetitive matrix protein 2 OS=Mus musculus OX=10090 GN=Srrm2 PE=1 SV=3	Srrm2	Srrm2_[S1556/S1557]	YES	Q8BTI8	Q8BTI8 [1554-1561]	0	1376.65	8	0	0.836	0.974	1.084	-0.26	-0.04	0.12	0.192137	0.8378	0.826647	0.757093	0.995193	0.998116	5.66	10.48	5.25	11.6036	10.7345	11.2401	0.745	0.903	0.812	0.861
2928	High	Unambiguous	FSGEEGEIEDDESGTENREEKDSLQPSAE	[K].FSGEEGEIEDDESGTENREEKDSLQPSAE.[-]	1xTMT6plex [K21]; 1xTMT6plex [N-Term]; 1xPhospho [S13(97.6)]	1xTMT6plex [K21]; 1xTMT6plex [N-Term]; 1xPhospho [S2(0); S13(97.6); T15(2.4); S23(0); S27(0)]	Q569Z6 1xPhospho [S935(97.6)]	Q569Z6 1xPhospho [S924(0); S935(97.6); T937(2.4); S945(0); S949(0)]	0.000163324	0	1.481	1	1	13	Q569Z6	Q569Z6	Thyroid hormone receptor-associated protein 3 OS=Mus musculus OX=10090 GN=Thrap3 PE=1 SV=1	Thrap3	Thrap3_S935	YES	Q569Z6	Q569Z6 [923-951]	2	3751.64	29	0	0.882	1.077	1.149	-0.18	0.11	0.2	0.407702	0.545046	0.697226	0.950888	0.977655	0.998116	5.53	10.51	14.48	8.9747	8.51846	8.08693	0.754	0.964	0.882	0.872	0.924
318	High	Unambiguous	QSSFEIPDDVPLPAGWEMAK	[R].QSSFEIPDDVPLPAGWEMAK.[T]	1xTMT6plex [K20]; 1xTMT6plex [N-Term]; 1xPhospho [S3(94.5)]	1xTMT6plex [K20]; 1xTMT6plex [N-Term]; 1xPhospho [S2(5.6); S3(94.5)]	P46938 1xPhospho [S149(94.5)]	P46938 1xPhospho [S148(5.6); S149(94.5)]	6.76e-06	0	2.113	1	1	17	P46938	P46938	Transcriptional coactivator YAP1 OS=Mus musculus OX=10090 GN=Yap1 PE=1 SV=2	Yap1	Yap1_S149	YES	P46938	P46938 [147-166]	0	2755.35	20	0	0.892	0.87	0.873	-0.16	-0.2	-0.2	0.571046	0.301619	0.556056	0.98968	0.896247	0.996923	11.02	7.49	19.09	7.6851	7.30378	7.47411	0.892	0.975	0.71	0.726	0.935
1390	High	Unambiguous	VHGLPTTSPSGVNMAELAQQVVK	[R].VHGLPTTSPSGVNMAELAQQVVK.[Q]	1xOxidation [M14]; 1xTMT6plex [K23]; 1xTMT6plex [N-Term]; 1xPhospho [T/S]	1xOxidation [M14]; 1xTMT6plex [K23]; 1xTMT6plex [N-Term]; 1xPhospho [T6(3.4); T7(46.7); S8(46.7); S10(3.4)]	Q9R210 1xPhospho [T/S]	Q9R210 1xPhospho [T329(3.4); T330(46.7); S331(46.7); S333(3.4)]	9.58e-08	0	2.956	1	1	14	Q9R210	Q9R210	Transcription factor EB OS=Mus musculus OX=10090 GN=Tfeb PE=1 SV=2	Tfeb	Tfeb_[T330/S331]	YES	Q9R210	Q9R210 [324-346]	0	2917.53	23	0	0.727	1.055	0.744	-0.46	0.08	-0.43	0.0491417	0.68956	0.255351	0.36028	0.99264	0.821727	6	35.34	22.18	7.6009	6.77398	7.5079	0.784	0.673	0.673		0.932
449	High	Unambiguous	KCDHESSPGTDEDKSG	[K].KCDHESSPGTDEDKSG.[-]	1xCarbamidomethyl [C2]; 2xTMT6plex [K1; K14]; 1xTMT6plex [N-Term]; 3xPhospho [S6(100); S7(100); T10(100)]	1xCarbamidomethyl [C2]; 2xTMT6plex [K1; K14]; 1xTMT6plex [N-Term]; 3xPhospho [S6(100); S7(100); T10(100); S15(0)]	A2AR02 3xPhospho [S742(100); S743(100); T746(100)]	A2AR02 3xPhospho [S742(100); S743(100); T746(100); S751(0)]	0.000457487	0	1.274	1	1	9	A2AR02	A2AR02	Peptidyl-prolyl cis-trans isomerase G OS=Mus musculus OX=10090 GN=Ppig PE=1 SV=1	Ppig	Ppig_S742;S743;T746	YES	A2AR02	A2AR02 [737-752]	2	2676.09	16	0	0.961	1.142	1.188	-0.06	0.19	0.25	0.727444	0.238965	0.537339	0.992312	0.849352	0.996923	6.59	14.39	18.14	10.6526	9.80439	10.506	0.88	1.248	0.949	0.972
2835	High	Unambiguous	GILSLPHQASPVSR	[K].GILSLPHQASPVSR.[T]	1xTMT6plex [N-Term]; 1xPhospho [S10(95.1)]	1xTMT6plex [N-Term]; 1xPhospho [S4(0); S10(95.1); S13(5)]	O88907 1xPhospho [S503(95.1)]	O88907 1xPhospho [S497(0); S503(95.1); S506(5)]	1.07e-06	0	2.478	1	1	7	O88907	O88907	E3 SUMO-protein ligase PIAS1 OS=Mus musculus OX=10090 GN=Pias1 PE=1 SV=2	Pias1	Pias1_S503	YES	O88907	O88907 [494-507]	0	1770.95	14	0	0.881	0.891	0.942	-0.18	-0.17	-0.09	0.49644	0.375272	0.796744	0.979638	0.929741	0.998116	6.25	18.3	2.38	7.81378	7.33271	8.01903	0.886	0.929	0.826	0.796	0.881
1506	High	Unambiguous	SFISSSPSSPSR	[K].SFISSSPSSPSR.[A]	1xTMT6plex [N-Term]; 1xPhospho [S9(93)]	1xTMT6plex [N-Term]; 1xPhospho [S1(0); S4(0); S5(0); S6(0); S8(6.5); S9(93); S11(0.5)]	Q3UTJ2 1xPhospho [S382(93)]	Q3UTJ2 1xPhospho [S374(0); S377(0); S378(0); S379(0); S381(6.5); S382(93); S384(0.5)]	0.000123295	0	1.537	1	1	9	Q3UTJ2	Q3UTJ2	Sorbin and SH3 domain-containing protein 2 OS=Mus musculus OX=10090 GN=Sorbs2 PE=1 SV=2	Sorbs2	Sorbs2_[S381/S382]	YES	Q3UTJ2	Q3UTJ2 [374-385]	0	1547.73	12	0	0.872	1.017	0.671	-0.2	0.02	-0.58	0.347246	0.918152	0.0731386	0.908265	0.997187	0.409673	2.99	15.28	30.45	9.866	9.03419	9.75697	0.855	0.89	0.934		0.844
3031	High	Unambiguous	EKEGAGSSGPEEPR	[R].EKEGAGSSGPEEPR.[A]	1xTMT6plex [K2]; 1xTMT6plex [N-Term]; 1xPhospho [S]	1xTMT6plex [K2]; 1xTMT6plex [N-Term]; 1xPhospho [S7(50); S8(50)]	D3Z6Q9 1xPhospho [S]	D3Z6Q9 1xPhospho [S463(50); S464(50)]	0.00133146	0.000209709	1.054	1	1	14	D3Z6Q9	D3Z6Q9	Bridging integrator 2 OS=Mus musculus OX=10090 GN=Bin2 PE=1 SV=1	Bin2	Bin2_S463	YES	D3Z6Q9	D3Z6Q9 [457-470]	1	1967.95	14	0	0.992	0.949	0.926	-0.01	-0.08	-0.11	0.947894	0.688072	0.638799	0.99999	0.99264	0.998116	5.07	11.25	24.89	9.75589	9.6793	10.1669	0.992	0.967	1.098	0.949	1.026
2898	High	Unambiguous	GDSETDLEALFNAVMNPK	[R].GDSETDLEALFNAVMNPK.[T]	1xOxidation [M15]; 1xTMT6plex [K18]; 1xTMT6plex [N-Term]; 1xPhospho [S/T]	1xOxidation [M15]; 1xTMT6plex [K18]; 1xTMT6plex [N-Term]; 1xPhospho [S3(50); T5(50)]	P46938 1xPhospho [S/T]	P46938 1xPhospho [S46(50); T48(50)]	3e-07	0	2.73	1	1	21	P46938	P46938	Transcriptional coactivator YAP1 OS=Mus musculus OX=10090 GN=Yap1 PE=1 SV=2	Yap1	Yap1_[S46/T48]	YES	P46938	P46938 [44-61]	0	2505.2	18	0	0.89	0.839	1.068	-0.17	-0.25	0.1	0.560834	0.31948	0.898376	0.98968	0.903987	0.999275	3.19	8.87	12.47	7.66463	7.67101	8.09276	0.866	1.138	0.837	0.909	0.89
311	High	Unambiguous	QTDPSTPQQESSK	[K].QTDPSTPQQESSK.[S]	1xTMT6plex [K13]; 1xTMT6plex [N-Term]; 1xPhospho [T6(95.6)]	1xTMT6plex [K13]; 1xTMT6plex [N-Term]; 1xPhospho [T2(0.2); S5(4.2); T6(95.6); S11(0); S12(0)]	Q69ZA1 1xPhospho [T1147(95.6)]	Q69ZA1 1xPhospho [T1143(0.2); S1146(4.2); T1147(95.6); S1152(0); S1153(0)]	0.000390677	0	1.306	1	1	10	Q69ZA1	Q69ZA1	Cyclin-dependent kinase 13 OS=Mus musculus OX=10090 GN=Cdk13 PE=1 SV=3	Cdk13	Cdk13_[S1146/T1147]	YES	Q69ZA1	Q69ZA1 [1142-1154]	0	1970.95	13	0	0.997	1.01	0.942	0	0.01	-0.09	0.848181	0.899064	0.764749	0.999182	0.997038	0.998116	1.28	9.44	53.74	7.70943	7.67525	7.97957	0.997	0.989	0.847	1.114	1.003
922	High	Unambiguous	RFSEGVLQPPSQDQEK	[R].RFSEGVLQPPSQDQEK.[L]	1xTMT6plex [K16]; 1xTMT6plex [N-Term]; 1xPhospho [S3(100)]	1xTMT6plex [K16]; 1xTMT6plex [N-Term]; 1xPhospho [S3(100); S11(0)]	P58871 1xPhospho [S429(100)]	P58871 1xPhospho [S429(100); S437(0)]	6.52e-06	0	2.12	1	1	8	P58871	P58871	182 kDa tankyrase-1-binding protein OS=Mus musculus OX=10090 GN=Tnks1bp1 PE=1 SV=2	Tnks1bp1	Tnks1bp1_S429	YES	P58871	P58871 [427-442]	1	2383.21	16	0	0.808	1.184	0.846	-0.31	0.24	-0.24	0.152144	0.285084	0.503601	0.683856	0.888813	0.98569	7.56	7.53	20.52	8.72656	7.66534	8.47816	0.734	0.936	0.808	0.786	0.871
3435	High	Unambiguous	RVDLSDEEAKETEHLK	[K].RVDLSDEEAKETEHLK.[K]	2xTMT6plex [K10; K16]; 1xTMT6plex [N-Term]; 1xPhospho [S5(100)]	2xTMT6plex [K10; K16]; 1xTMT6plex [N-Term]; 1xPhospho [S5(100); T12(0)]	Q9EQ28 1xPhospho [S306(100)]	Q9EQ28 1xPhospho [S306(100); T313(0)]	0.0013508	0.000404169	1.051	1	1	4	Q9EQ28	Q9EQ28	DNA polymerase delta subunit 3 OS=Mus musculus OX=10090 GN=Pold3 PE=1 SV=2	Pold3	Pold3_S306	YES	Q9EQ28	Q9EQ28 [302-317]	2	2666.4	16	0	0.993	1.016	1.046	-0.01	0.02	0.06	0.955251	0.895587	0.999128	0.99999	0.997038	0.999899	8.19	8.87	2.85	9.75699	9.25716	9.38851	1.03	1.068	0.89		0.958
2189	High	Unambiguous	ESSPSWSTDSSLEPVLPGSPTPSR	[K].ESSPSWSTDSSLEPVLPGSPTPSR.[V]	1xTMT6plex [N-Term]; 1xPhospho [S19(88.2)]	1xTMT6plex [N-Term]; 1xPhospho [S2(0); S3(0); S5(0); S7(0); T8(0); S10(0); S11(0); S19(88.2); T21(5.9); S23(5.9)]	Q9QXD8 1xPhospho [S413(88.2)]	Q9QXD8 1xPhospho [S396(0); S397(0); S399(0); S401(0); T402(0); S404(0); S405(0); S413(88.2); T415(5.9); S417(5.9)]	2.66e-07	0	2.754	1	1	15	Q9QXD8	Q9QXD8	LIM domain-containing protein 1 OS=Mus musculus OX=10090 GN=Limd1 PE=1 SV=2	Limd1	Limd1_S413	NO	Q9QXD8	Q9QXD8 [395-418]	0	2809.31	24	0	0.903	0.928	1.032	-0.15	-0.11	0.05	0.62616	0.761448	0.894957	0.98968	0.99264	0.999275	8.11	5.96	16.65	6.64439	6.18441	6.46031	0.887	0.583	0.92	1.008
1533	High	Unambiguous	SEDRPSSPQVSVAAVETK	[R].SEDRPSSPQVSVAAVETK.[E]	1xTMT6plex [K18]; 1xTMT6plex [N-Term]; 1xPhospho [S7(99.6)]	1xTMT6plex [K18]; 1xTMT6plex [N-Term]; 1xPhospho [S1(0); S6(0.4); S7(99.6); S11(0); T17(0)]	P70399 1xPhospho [S268(99.6)]	P70399 1xPhospho [S262(0); S267(0.4); S268(99.6); S272(0); T278(0)]	5.81e-08	0	3.055	1	1	18	P70399	P70399	TP53-binding protein 1 OS=Mus musculus OX=10090 GN=Tp53bp1 PE=1 SV=3	Tp53bp1	Tp53bp1_S268	YES	P70399	P70399 [262-279]	0	2425.24	18	0	0.974	0.841	1.041	-0.04	-0.25	0.06	0.796507	0.186673	0.972659	0.998955	0.791796	0.999899	1.97	8.39	28.7	9.94983	9.49546	9.97599	0.835	0.984	0.927	0.974	0.987
2614	High	Unambiguous	DASPSSSSAVASSK	[R].DASPSSSSAVASSK.[A]	1xTMT6plex [K14]; 1xTMT6plex [N-Term]; 1xPhospho [S]	1xTMT6plex [K14]; 1xTMT6plex [N-Term]; 1xPhospho [S3(48.8); S5(48.8); S6(2.3); S7(0); S8(0); S12(0); S13(0)]	Q8K2H1 1xPhospho [S]	Q8K2H1 1xPhospho [S219(48.8); S221(48.8); S222(2.3); S223(0); S224(0); S228(0); S229(0)]	1.6e-07	0	2.855	1	1	17	Q8K2H1	Q8K2H1	Periphilin-1 OS=Mus musculus OX=10090 GN=Pphln1 PE=1 SV=1	Pphln1	Pphln1_S219	YES	Q8K2H1	Q8K2H1 [217-230]	0	1818.89	14	0	0.944	1.019	0.981	-0.08	0.03	-0.03	0.637996	0.855708	0.804597	0.98968	0.995606	0.998116	5.98	13.78	4.03	10.1439	9.38716	9.49765	0.759	1.039	0.944	0.913	0.987
1936	High	Unambiguous	SMSADEDLQEPSR	[R].SMSADEDLQEPSR.[R]	1xOxidation [M2]; 1xTMT6plex [N-Term]; 1xPhospho [S1(99.8)]	1xOxidation [M2]; 1xTMT6plex [N-Term]; 1xPhospho [S1(99.8); S3(0.2); S12(0)]	P19426 1xPhospho [S113(99.8)]	P19426 1xPhospho [S113(99.8); S115(0.2); S124(0)]	2.17e-05	0	1.882	1	1	21	P19426	P19426	Negative elongation factor E OS=Mus musculus OX=10090 GN=Nelfe PE=1 SV=2	Nelfe	Nelfe_S115	NO	P19426	P19426 [113-125]	0	1789.75	13	0	1.097	1.081	1.31	0.13	0.11	0.39	0.568357	0.482109	0.309384	0.98968	0.965376	0.879771	4.95	16.01	48.68	10.0308	9.75606	9.76421	1.097	1.061	0.842	1.343	1.104
[truncated: 336 more columns]

## Sheet: AKT site table
Name	Symbol	Phosphosite (mouse)	Protein Accessions	Fold induced in Rel-/- vs WT (log2)	p-value	CST phosphosite(s) (human)	CST name (if different)
Proline-rich AKT1 substrate 1 OS=Mus musculus OX=10090 GN=Akt1s1 PE=1 SV=1	Akt1s1	Akt1s1_T247	Q9D1F4	1.1947	0.000351321	T246	PRAS40
B-cell lymphoma/leukemia 10 OS=Mus musculus OX=10090 GN=Bcl10 PE=1 SV=1	Bcl10	Bcl10_S141	Q9Z0H7	0.589862	0.0179243	S218, S231
DNA (cytosine-5)-methyltransferase 1 OS=Mus musculus OX=10090 GN=Dnmt1 PE=1 SV=5	Dnmt1	Dnmt1_S125	P13864	0.432562	0.0436686	S143
Histone acetyltransferase p300 OS=Mus musculus OX=10090 GN=Ep300 PE=1 SV=2	Ep300	Ep300_S1037	B2RWS6	0.45743	0.0319693	S1834	p300
Forkhead box protein O1 OS=Mus musculus OX=10090 GN=Foxo1 PE=1 SV=2	Foxo1	Foxo1_S467	Q9R1E0	0.463705	0.0228809	S256, S319, T24	FOXO1a
Forkhead box protein O1 OS=Mus musculus OX=10090 GN=Foxo1 PE=1 SV=2	Foxo1	Foxo1_S284	Q9R1E0	0.344268	0.0435243
Forkhead box protein O1 OS=Mus musculus OX=10090 GN=Foxo1 PE=1 SV=2	Foxo1	Foxo1_S467	Q9R1E0	0.334142	0.0331278
Heat shock protein beta-1 OS=Mus musculus OX=10090 GN=Hspb1 PE=1 SV=3	Hspb1	Hspb1_S86	P14602	0.869163	0.0107493	S82	HSP27
Palladin OS=Mus musculus OX=10090 GN=Palld PE=1 SV=2	Palld	Palld_S901	Q9ET54	1.08706	0.014261	S1118	palladin
Programmed cell death protein 4 OS=Mus musculus OX=10090 GN=Pdcd4 PE=1 SV=1	Pdcd4	Pdcd4_S94	Q61823	0.934755	0.001789	S67, S457
Astrocytic phosphoprotein PEA-15 OS=Mus musculus OX=10090 GN=Pea15 PE=1 SV=1	Pea15	Pea15_S116	Q62048	3.14392	0.00667933	S116
Astrocytic phosphoprotein PEA-15 OS=Mus musculus OX=10090 GN=Pea15 PE=1 SV=1	Pea15	Pea15_S116	Q62048	1.3141	0.000874521
Astrocytic phosphoprotein PEA-15 OS=Mus musculus OX=10090 GN=Pea15 PE=1 SV=1	Pea15	Pea15_S116	Q62048	0.741677	0.000883925
Ran-binding protein 3 OS=Mus musculus OX=10090 GN=Ranbp3 PE=1 SV=2	Ranbp3	Ranbp3_S40;S33	Q9CT10	0.503489	0.0197255	S126
Ran-binding protein 3 OS=Mus musculus OX=10090 GN=Ranbp3 PE=1 SV=2	Ranbp3	Ranbp3_S40;S32;S33	Q9CT10	0.439457	0.0352303
Ran-binding protein 3 OS=Mus musculus OX=10090 GN=Ranbp3 PE=1 SV=2	Ranbp3	Ranbp3_S283	Q9CT10	0.398598	0.0129637
Ran-binding protein 3 OS=Mus musculus OX=10090 GN=Ranbp3 PE=1 SV=2	Ranbp3	Ranbp3_[S58/T60]	Q9CT10	0.342721	0.0230189
40S ribosomal protein S3 OS=Mus musculus OX=10090 GN=Rps3 PE=1 SV=1	Rps3	Rps3_T221	P62908	1.41212	0.0167525	T70
Ubiquitin carboxyl-terminal hydrolase 8 OS=Mus musculus OX=10090 GN=Usp8 PE=1 SV=2	Usp8	Usp8_S680	Q80U87	0.701507	0.0176845	T945
Serine/threonine-protein kinase WNK1 OS=Mus musculus OX=10090 GN=Wnk1 PE=1 SV=2	Wnk1	Wnk1_S185	P83741	0.796032	0.00201975	T60
Transcriptional coactivator YAP1 OS=Mus musculus OX=10090 GN=Yap1 PE=1 SV=2	Yap1	Yap1_S149	P46938	0.324462	0.0274057	S127
Transcriptional coactivator YAP1 OS=Mus musculus OX=10090 GN=Yap1 PE=1 SV=2	Yap1	Yap1_[S46/T48]	P46938	0.312563	0.0390757
Zyxin OS=Mus musculus OX=10090 GN=Zyx PE=1 SV=2	Zyx	Zyx_S336	Q62523	0.44344	0.015056	S142	zyxin

## Sheet: Kinase Table
Master Protein Descriptions	Symbol	Phosphosite(s)	Protein Accessions	cREL_Control/WT_Control_logFC	cREL_Control/WT_Control_P.Value
AP2-associated protein kinase 1 OS=Mus musculus OX=10090 GN=Aak1 PE=1 SV=2	Aak1	Aak1_S729	Q3UHJ0	0.601688	0.0112177
[3-methyl-2-oxobutanoate dehydrogenase [lipoamide]] kinase; mitochondrial OS=Mus musculus OX=10090 GN=Bckdk PE=1 SV=1	Bckdk	Bckdk_S31	O55028	0.431494	0.0117568
BMP-2-inducible protein kinase OS=Mus musculus OX=10090 GN=Bmp2k PE=1 SV=1	Bmp2k	Bmp2k_S908	Q91Z96	0.947345	0.00623222
Cyclin-dependent kinase 11B OS=Mus musculus OX=10090 GN=Cdk11b PE=1 SV=2	Cdk11b	Cdk11b_S115	P24788	0.682464	0.0040398
Cyclin-dependent kinase 13 OS=Mus musculus OX=10090 GN=Cdk13 PE=1 SV=3	Cdk13	Cdk13_[S1146/T1147]	Q69ZA1	0.309816	0.0256455
Mitogen-activated protein kinase kinase kinase kinase 1 OS=Mus musculus OX=10090 GN=Map4k1 PE=1 SV=1	Map4k1	Map4k1_S370;[S375/Y379]	P70218	0.459057	0.0419625
Mitogen-activated protein kinase kinase kinase kinase 4 OS=Mus musculus OX=10090 GN=Map4k4 PE=1 SV=1	Map4k4	Map4k4_S701	P97820	0.647957	0.00172516
Mitogen-activated protein kinase 14 OS=Mus musculus OX=10090 GN=Mapk14 PE=1 SV=3	Mapk14	Mapk14_Y182	P47811	1.08606	0.0146802
Misshapen-like kinase 1 OS=Mus musculus OX=10090 GN=Mink1 PE=1 SV=3	Mink1	Mink1_S729	Q9JM52	0.363339	0.0311515
Phosphatidylinositol 4-kinase type 2-alpha OS=Mus musculus OX=10090 GN=Pi4k2a PE=1 SV=1	Pi4k2a	Pi4k2a_S47	Q2TBE6	0.389106	0.0173626
5'-AMP-activated protein kinase subunit beta-1 OS=Mus musculus OX=10090 GN=Prkab1 PE=1 SV=2	Prkab1	Prkab1_S108	Q9R078	0.745975	0.00622251
cAMP-dependent protein kinase type I-alpha regulatory subunit OS=Mus musculus OX=10090 GN=Prkar1a PE=1 SV=3	Prkar1a	Prkar1a_S83	Q9DBC7	1.19003	0.00902311
cAMP-dependent protein kinase type II-beta regulatory subunit OS=Mus musculus OX=10090 GN=Prkar2b PE=1 SV=3	Prkar2b	Prkar2b_S112	P31324	0.556661	0.041814
Serine/threonine-protein kinase PRP4 homolog OS=Mus musculus OX=10090 GN=Prpf4b PE=1 SV=3	Prpf4b	Prpf4b_Y849	Q61136	0.993706	0.0328718
SNF-related serine/threonine-protein kinase OS=Mus musculus OX=10090 GN=Snrk PE=1 SV=1	Snrk	Snrk_S569	Q8VDU5	0.475558	0.021302
Serine/threonine-protein kinase 10 OS=Mus musculus OX=10090 GN=Stk10 PE=1 SV=2	Stk10	Stk10_S437	O55098	0.42783	0.0136892
Serine/threonine-protein kinase 4 OS=Mus musculus OX=10090 GN=Stk4 PE=1 SV=1	Stk4	Stk4_S418	Q9JI11	1.53217	2.62358e-05
Serine/threonine-protein kinase 4 OS=Mus musculus OX=10090 GN=Stk4 PE=1 SV=1	Stk4	Stk4_S320	Q9JI11	1.1585	0.000123769
Traf2 and NCK-interacting protein kinase OS=Mus musculus OX=10090 GN=Tnik PE=1 SV=2	Tnik	Tnik_S737	P83510	0.886844	0.00151674
Serine/threonine-protein kinase WNK1 OS=Mus musculus OX=10090 GN=Wnk1 PE=1 SV=2	Wnk1	Wnk1_S185	P83741	0.796032	0.00201975
