# Supplementary material for: Up-regulation of the PI3K/AKT and RHO/RAC/PAK signalling pathways in CHK1 inhibitor resistant Eµ-Myc lymphoma cells
Source: Biochem J. 2022 Oct 14;479(19):2131–51. doi: 10.1042/BCJ20220103 (PMC9704644; doi:10.1042/BCJ20220103)
Supplement: Supplementary Material 4 [file BCJ-479-2131-s4.pdf]

## Sheet: Description
Supp Data File 2 Venn diagrams.xlsx
Data files from Venn analysis of Em-Myc lymphoma cell proteomics
Tab 1: Comparison between the unique phosphopeptides upregulated in untreated c-Rel null relative to untreated wild type with those up regulated in WT cells treated with CHK1i (CCT244747) versus untreated WT.
Tab 2: Comparison between total proteins upregulated in untreated c-Rel null relative to untreated wild type with those up regulated in WT cells treated with CHK1i (CCT244747) versus untreated WT.
Tab 3: Comparison between unique phosphopeptides upregulated in untreated c-Rel null relative to untreated wild type with those up regulated in untreated RelAT505A relative to untreated wild type.

## Sheet: Phospho up in REL vs WT CHK1i
Names	total	elements
REL vs WT up WT up CHK1i	150	Ahsg_S309;S314
		Smc3_S1067
		Smarcc2_S304;S306
		Hmga1_[S102/S103]
		Map1b_S1260
		Fam129a_S601
		Slc9a1_S697
		Il16_S967
		Flna_S2152
		Smarcc1_S327;S329
		Npm1_S241
		Rabep1_S407;S410
		Hnrnpk_T118
		Pdlim2_S199;[S204/S205]
		Nucb1_S456
		Flna_S2180
		Etv6_S215
		Cbx3_S93;S95
		Eif4g2_T507
		Zcchc8_T474
		Ap3d1_S784
		Hsp90aa1_S231
		Dffa_S314
		Macf1_[S3082/S3085]
		Tfeb_[T330/S331]
		Epsti1_S39
		Pds5b_S1356
		Chd4_S1528
		Kctd12_S178
		Cbx5_S93
		Xrn2_S499;S501
		Cbx3_[S95/S97/S99];S95
		Usp7_S19
		Zyx_S336
		Dok3_S274
		Zc3h14_S515
		Fmnl1_S184
		Prkar2b_S112
		Tns3_S769
		Nsfl1c_S176
		Limch1_S973
		Raver1_S576
		Nfkb1_S940
		Wrnip1_S65
		Trim28_T599;S598;S600
		Cbx3_S95;S97;S99
		Dkc1_S455
		Hcfc1_S2030
		Cfl1_S3
		Fgfr1op_S160
		Fli1_[T35/S39]
		Agfg1_T177;[S179/S181]
		Lcp1_S257
		Eif4g3_[S267/T269]
		Mink1_S729
		Zcchc8_S429
		Fyb1_S561
		Tmem184b_S403
		Hist1h1e_S102
		Rplp0_S307
		Hnrnph1_S104
		Ppp1r12a_S870
		Nav1_S651
		Sept2_S218
		Ikzf1_S440
		Psma3_S250
		Thumpd1_S86;S88
		Yap1_S149
		Cobll1_T899
		Sh3kbp1_[S156/S159]
		Rgs3_S686
		Ranbp3_S283
		Akt1s1_T247
		Fam129a_S595
		Trim28_[S823/S824]
		Tns3_S752
		Treml1_[S228/S229]
		Sash3_S38;S42
		Plekho2_S236
		Ahsg_S138
		Hsp90ab1_S255
		Stab2_S2503
		Evi2b_[S295/S296]
		Sh3kbp1_[S630/S631/S633]
		Hnrnpu_S247
		Plekho2_S395
		Cbx3_S95
		Pea15_S116
		Hsp90ab1_S226
		Rabep2_S180
		Hsp90aa1_S263
		Dbnl_T299
		Myh9_[T1939/S1943]
		Map4k4_S701
		Stk4_S418
		Prpf4b_Y849
		Srrm2_[S1556/S1557]
		Myo18a_S2039
		Ahsg_S309;S312;S314
		Hist1h3a_S29
		Ag2_S210
		Fyb1_S546
		Hist1h1b_[S2/T4]
		Sgta_T82
		Hmga1_S9
		Tnks1bp1_S429
		Dido1_T148;S149;S151
		Ensa_S109
		Cic_S1809
		Ahsg_S312
		Dock2_S1729
		Eef1d_T147;S162
		Ptprc_S964
		Epb41l3_S804
		Dbnl_[S277/T278/T279]
		Eif3b_S75
		P58686_S82
		Hnrnpul1_[Y720/S721]
		Tmpo_S157
		Limch1_S377
		Filip1l_S789
		Tnip1_S448
		Mtss1l_S575
		Cbx1_S89
		Prpf40a_S879;S881;S884
		Eef1d_S162
		Akap2_[S799/T801]
		Akap13_S1892
		Fn1_S2475
		Ostf1_S214
		Thrap3_S935
		Sash3_S7
		Sh3kbp1_S227
		Pdlim2_S120;S143;T138
		Hmga1_S2;S4
		Htatsf1_S441
		Macf1_S4483
		Srrm2_S2052;S2054
		Pcnt_S1437
		Pias1_S503
		Cbx3_S93;S95;S97
		Stk10_S437
		Macf1_S3889
		Cd2ap_S458
		Eif3b_S120;S123
		Srrm2_S2404
		Dock8_[S903/S904/S905]
		Hnrnpa3_S359
		Pogz_S422
		Sh3kbp1_S274
WT up CHK1i	144	Hnrnpu_S58
		Ubxn1_S187;S200
		Cast_S730
		Chaf1a_[S294/S296]
		Iws1_S384
		Ranbp3_S40
		Tcof1_S169;T171
		Lmna_S392
		Gapvd1_T762
		Pnisr_S211
		Slc9a3r1_S297
		Chchd2_S45
		Cep170_S829
		Sash1_S83
		Thrap3_S679
		Cc2d1a_S435
		Srrm2_S349
		Srrm2_S814
		Nucks1_S144;S130
		Rplp1_S104
		Klc4_S590
		Eif4ebp2_T41;T46
		Zc3h4_S92
		Zc3h18_S888
		Sgta_T305
		Cfdp1_T129
		Srrm2_S1339;S1343
		Srrm2_S1380
		Zc3h13_S1090;S1093
		Zc3h18_S847
		Pdlim5_S228
		Eif3g_S42
		Srrm2_S1216;S1209
		Srsf2_S191
		Iws1_S261
		Top2a_S1469;S1470
		Top2a_S1472
		Srrm2_S323
		Efhd2_[S74/S76]
		Cast_S518
		Map4_S1046
		Tp53bp1_S1096
		Hmga1_T53
		Efhd2_S74
		Slc7a6os_S156
		Mki67_[T3059/S3061]
		Nolc1_S238
		Srrm2_S2224
		Iws1_S185
		Lsp1_S63
		Lima1_S488
		Zc3h18_[S530/S532]
		Unc119_S41;S39
		Rcsd1_T256
		Mybbp1a_S1253
		Nucks1_S144
		Hirip3_S153
		Lmnb1_[T21/S24]
		Srrm2_[S1193/S1194]
		Hmga1_S99;S102;S103
		Hist1h1d_T18
		Cenpu_S186
		Tcof1_S456
		Jund_S100
		Fip1l1_S86
		Esf1_S651
		Acin1_S387;S389;S391
		Hirip3_S231;S234;S238
		Eif3g_T41;S42
		Atox1_S44
		Hirip3_S238
		Igf2r_S2401
		Srrm2_S435;[S433/S434]
		Rplp2_S105
		Pds5b_S1166
		Srrm2_[S1229/S1230]
		Gatad2a_S96
		Vim_S459
		Pdap1_S60
		Ccdc94_S309;[S312/S314]
		Tcof1_S499
		Thrap3_S207
		Zbp1_S384
		Rcsd1_[S82/S83]
		Psip1_S272
		Ddx21_S118
		Phf2_S534
		Slco2b1_S21
		Polr2a_T1915;
		Srrm2_[S1475/S1477]
		Bcl9l_T986;S988
		Hirip3_S389
		Pnisr_S290
		Rcsd1_S120;S127;S123
		Nucks1_S58
		Igf2r_S2476
		Tfeb_S108;S113
		Srsf6_S316
		Srrm2_T823
		Rif1_[S1867/S1868]
		Matr3_S195
		Bag6_S1139
		Synpo_S833
		Ensa_S2
		Synpo_S134
		Gpalpp1_S104
		Rcsd1_S120;S127
		Luzp1_S660
		Hemgn_S135
		Set_S183
		Ppp1r18_S234
		Mki67_S1352
		Srrm2_S1339
		Srrm2_[S1535/S1537/S1538];S1535
		Hmga1_T53;S36
		Hemgn_S171;S158;T155
		Srrm2_S454
		Sp1_S7
		Akap12_S1292
		Pds5b_S1281
		Ranbp2_S2505
		Csrp1_S192
		Pym1_S138
		Rcsd1_S105;S108
		Nucks1_S58;S61
		Nolc1_[S370/S371/S372]
		Stip1_S481
		Ncl_S145
		Mki67_S337
		Tcof1_S88
		Zc3h13_S1093
		Rab11fip5_S474
		Srsf4_S401
		Vim_S325
		Apbb1ip_T534
		Pdlim4_[S118/S119]
		Acin1_S380
		Hemgn_S435
		Hemgn_S380
		Zc3h13_S921
		Sorbs2_S358
		Npm1_S4
		Arhgap30_[S875/T876]
		Ap3d1_S760
REL vs WT up	330	Tp53bp1_S268
		Dpf2_T176
		Acaca_S29
		Wdr44_[S3/S5]
		Lbr_S101
		Ranbp2_S2729
		Scaf8_S617
		Cast_S15
		Canx_S553;[T561/S563]
		Q99M08_S19
		Nelfe_S51
		Cavin2_S359;S363
		Fam76b_S193
		Tle3_[T285/S286]
		Ccnk_S325;S329
		Bin1_S298
		Synpo2_S300
		Hdgfl3_S121;S122
		Thumpd1_S8
		Vcl_S290
		Tbc1d5_S565
		Washc2_S388
		Nsun2_S723
		Bmp2k_S908
		Add3_S681
		Arap1_S232
		Rabep1_S410;[S407/T408]
		Syap1_T262
		Ppp6r2_T672
		Slu7_S215
		Cntrob_S63
		Macf1_S3082;S3085
		Tlk1_[S133/S134]
		Alkbh5_[S384/S385]
		Hist1h1a_S2
		Pag1_S247
		Mecp2_S80
		Ablim1_S396
		Set_S30
		Irf3_S135
		Mapk14_Y182
		Pgrmc1_S181
		Nfatc2_S860
		Tagln2_S163
		Cdk11b_S115
		Nes_S688
		Itga4_S1028
		Dek_S306;S308;S311;S312
		Eif2b5_S540
		Anp32b_T265
		Slc9a1_S801
		Pold3_S306
		Ythdc1_S146;T148
		Nelfe_S115
		Pacsin1_S346;[S345/Y347]
		Ing4_S150
		Myc_T58;[S62/S64]
		Irf2bpl_S638
		Myc_[S62/S64]
		Ranbp3_S40;S32;S33
		Hmga1_S102;S103
		Sh3kbp1_S553;S555
		Erbin_S599;S600
		Map1b_S1815
		Eef1d_S133
		Serbp1_[S327/S329]
		Trim28_S601;[T599/S600]
		Ep300_S1037
		Bnip2_S114
		Usp8_S680
		Slc9a1_S790
		Znf185_[S18/S20]
		Thrap3_[S913/T914/S915]
		Snx17_S409
		Acin1_[S838/T840]
		Slc9a3r1_S297;[S283/S285/S286]
		Canx_[T561/S563]
		Foxo1_S284
		Dcaf5_S799
		Ptges3_S113
		Map1b_S1438
		Taf12_S51
		Pa2g4_S2
		Limd1_S413
		Akap12_[S235/T236]
		Pag1_[S348/S351]
		Ppp1r11_S82;T80
		Pi4k2a_S47
		Hnrnpa1_S6
		Nes_S1860;S1861
		Ikzf3_S42
		Snip1_[S89/S91]
		Ms4a1_S29
		Stub1_S20
		Arid3a_S127
		Slc9a3r1_S275
		Tnfrsf13c_T163
		Fkbp15_S1159
		Znf639_S60
		Ncoa3_S847
		Srrm1_S260
		Myo9b_S1175
		Erbin_S869
		Tceal3_S120
		Synpo2_[T219/S220]
		Hdac2_S422;S424
		Bach2_S314
		Srrm2_S1360;[T1370/S1372]
		Lrrfip1_S84
		Sptbn1_S2102
		Rplp1_S101;S104
		Foxo1_S467
		Uba1_S4
		Ubxn1_[S200/S202]
		Rtn4_S16
		Yap1_[S46/T48]
		Clint1_S324
		Dnmt1_S125
		Anp32a_T15
		Ppp1r12a_[S445/Y446]
		Nipbl_S280
		Hist1h1d_[S2/T4]
		Marcks_T143
		Canx_S582
		Myh11_S1954
		Fam103a1_S36
		Znf609_S575;S577
		Hnrnpul2_S191
		Ablim1_S496
		Akap12_T583
		Sh3kbp1_S555
		Arhgef6_S639
		Znf185_[T64/S65]
		Srsf1_S234;S242;S238
		Fnbp1_S299
		Pphln1_S219
		Srrm1_S723;S725;S731;S733
		Sipa1l3_S1538
		Pml_[T513/S514/S515]
		Srsf2_T25
		Lsp1_S243
		Nes_S1837
		Myh9_T1939;S1943
		Srrm2_S2646
		Snrk_S569
		Pphln1_S154
		Npm1_S10
		Ppig_S742;S743;T746
		Ripor2_S582
		Inpp5f_S908
		Bckdk_S31
		Erbin_S849
		Numa1_S398
		Zc3h4_S1270;S1276
		Tnik_S737
		Prkab1_S108
		Sash3_S320;T318
		Abi1_S225
		Srrm1_S723;S725;S731
		E4f1_S166
		Nucks1_T179
		Plekha6_S901
		Sash3_S42
		Ly9_T647
		Elf1_S334
		Dbn1_[S141/S142]
		Pwp1_S49
		Iws1_S345
		Sorbs2_[S381/S382]
		Sptan1_S1029
		Apobr_S484
		Tbc1d5_S578
		Slc9a3r1_[S263/S264]
		Evl_[S243/S244]
		Ptprc_S1229
		Retreg2_T274;S276;S278
		Arhgef6_S679
		Dennd1c_T696
		Nucks1_S19
		Cmtr1_S27
		Ppig_S685
		Irf2bp1_S384
		Kpna3_S60
		Reps1_S561
		Znf609_S575
		Erbin_S1013
		Arid3a_[S77/S78]
		Filip1l_S1047
		Pxn_S83
		Lamtor1_T28
		Vgll4_S58
		Tcf20_S612;S603
		Bcl10_S141
		Pml_[T527/S528]
		Washc2_S613;S614
		Ppp6r1_S531
		Nrbp1_S2
		Washc2_S747
		Eif5_S387;S388
		Rplp0_S304;S307
		Rad9a_S385
		Vcl_S346
		Rabep1_S407
		Atn1_S630
		Rpl22l1_S118
		Lsp1_S273
		Map4k1_S370;[S375/Y379]
		Pdcd4_S94
		Mphosph10_S164;S168
		Arid3a_[S101/S102]
		Api5_S464
		Sash1_S163
		Itsn1_S897
		Aak1_S729
		Son_S1723
		Hnrnpk_S284
		Mcm3_S668
		Lbh_S63
		Cic_S2284
		Pml_S515;[T513/S514]
		Ranbp3_[S58/T60]
		Myc_S164
		Mphosph10_S164;S168;S172
		Atn1_T615
		Ufl1_S458
		Washc2_S1169;S1173;T1174
		Atp2b1_S1155
		Hmgn1_S7
		Htatsf1_S724
		Zc3hc1_S393
		Rps3_T221
		Bach2_S314;T323
		Sptbn1_S2340
		Polr2a_Y1874
		Rere_S656
		Retreg3_S320;S313
		Myh9_S1943
		Ncoa1_S702
		Pdlim2_S204
		Washc2_S723
		Etv6_S22;T18
		Pml_S528
		Cdk13_[S1146/T1147]
		Acin1_S838
		Fkbp15_S1091
		Ncoa3_S720
		Washc2_S614
		Ppp1r11_[T80/S82]
		Tmx1_S245
		Washc2_S533
		Cfl1_T25
		Denr_T69
		Otud4_S1016;S1017
		Ptms_S5
		Evl_S367
		Cbx3_S93
		Znf609_S845;S848;S841
		Ablim1_S475
		Atf7ip_S593
		Strip1_S335
		Cep350_S1641
		Polr2a_S1920
		Sp100_[S314/T316]
		Eif3j1_S14
		Kri1_S142
		Gtf2i_S674
		Pml_S536;S528
		Dpf2_S142
		Ppp1r9b_S99
		Abi1_S183
		Rbm26_S127
		Ranbp3_S40;S33
		Rbl1_S1036
		Wnk1_S185
		Cstf2_S527
		Elf1_S187
		Rabep2_S176;T181
		Hist1h1c_S2
		Trim28_S752
		Nsfl1c_S114
		Epb41l2_S38
		Stk4_S320
		Edc3_S131
		Tpd52l2_S180
		Vasp_S317
		Pram1_S332
		Crtc2_S612
		Prkar1a_S83
		Hdac1_S421;S423
		Pdlim2_S210
		Cdk5rap2_[S479/T481/S485]
		Lsp1_T166;S168
		Wrnip1_S153
		Palld_S901
		Rbm25_S672
		Bin2_S463
		Tsc22d4_S298
		Arhgap1_S51
		Hspb1_S86
		Raver1_S626
		Irf2bp1_S436
		Spag9_S364
		Bank1_S11
		Sp110_S175
		Irf2bpl_S526
		Lcp1_S5
		Bin2_[S391/S392]
		Elac2_S815
		Crtc2_S457
		Akap12_S505
		Eml4_S146
		Glcci1_S293
		Tubb1_S435
		Arhgap27_S462;[S458/S459]
		Tpd52_S223
		Trim28_S51
		Mef2c_S222
		Hist1h1e_S2
		Dennd1b_S632
		Ablim1_S738
		Pou2f2_S55
		Sp100_S190
		Irf2bpl_S636;S638
		Dock2_S1683
		Apobr_S520
		Hmgn3_S6
		Msh6_S63
		Pphln1_S147
		Pml_S17
		Ppp1r12a_Y446

## Sheet: Proteins up in Rel vs WT CHK1i
Names	total	elements
REL vs WT up total WT vs WT CHK1i up total	343	Rpl18
		Hspa5
		Hgs
		Cox7c
		Cd74
		Hnrnpl
		Tuba1a
		Psmc3
		Rpl9
		Capzb
		Ssr1
		Serpina1b
		Dlat
		Ptgr1
		Nup50
		Blvrb
		Elavl1
		Strap
		Cndp2
		Lmnb2
		Parp1
		Adh5
		Actn4
		Pcna
		Sh3kbp1
		Capza1
		Mcm3
		Rps12
		Hnrnpa3
		Casp8
		Hsp90ab1
		Tcp1
		S100a11
		Anxa6
		Pcmt1
		Etfa
		Rps3
		Psme2
		Kif5b
		Ddx39a
		Ist1
		Coro1a
		Prdx1
		Rps20
		Pcbp2
		Stat1
		Txndc5
		Ppa1
		Lnpep
		Nme1
		Cct2
		Rpl13a
		Pdhb
		Anxa1
		Acadl
		Prps1
		Ppp2r1a
		Fn1
		Cox4i1
		Cr2
		Cfl1
		Uqcrc2
		P01882
		Rwdd1
		Eef1g
		Ppib
		Dynll1
		Mdh2
		Actl6a
		St13
		Pea15
		Capza2
		Ube2k
		Eftud2
		Pdia3
		Cdc37
		2011-09-01
		Cct8
		Psme1
		Ywhae
		Ddx39b
		Ppp1r12c
		Dstn
		Prmt1
		Pa2g4
		Gapdh
		Eif5a
		Tubb4b
		Lta4h
		Nme2
		Ywhaz
		Eef2
		Rpsa
		Elof1
		Gmfb
		Eef1d
		Hsp90b1
		Aif1
		Nudc
		Cap1
		Fgg
		RTRAF
		Tmem109
		Rpl27a
		Glrx3
		Eif2s3x
		Tubb5
		Mdh1
		Rplp0
		F10
		Txndc12
		Hars
		Nedd9
		Col14a1
		Prdx5
		Pebp1
		Vcam1
		Eef1a1
		Atg3
		Arl6ip1
		Arhgdia
		Tuba4a
		Park7
		Ass1
		Gmfg
		Rbbp4
		Psmb1
		Bicd2
		Snu13
		Psmc4
		Ran
		Rpl30
		Icam1
		Puf60
		Rpl28
		Calr
		Ppp2cb
		Prpf19
		Myh9
		Rap1b
		Prdx3
		Serpina1a
		Rpl10a
		Akr1b1
		Aco2
		Taldo1
		Fermt3
		Atic
		Hspa4
		Cd180
		Vtn
		Ms4a1
		Rack1
		Actc1
		Vcp
		Psmd7
		Mthfd1l
		Txndc17
		Pgk1
		Ddb1
		Idh2
		Actb
		Eno1
		Rps27
		Actr2
		Aldoa
		Ola1
		Rpa1
		Mcm4
		Iqgap1
		Acat1
		Tpi1
		Psmc6
		Pgls
		Ufc1
		Eml4
		Kpnb1
		Ahsa1
		Brk1
		Banf1
		Tgm2
		Wdr1
		Pkm
		Rai14
		Cd97
		Mapk1
		Cmpk1
		Eif4a3
		Lrrc47
		Stam
		Uchl3
		Ighm
		Pdia4
		Esd
		Hspa9
		B2m
		Ndufa4
		Cbx1
		Sars
		Shmt2
		Rps4x
		Uqcrc1
		Atp5f1b
		D10Jhu81e
		Snx1
		Arl6ip5
		Snx5
		Psma7
		Cox5b
		Dbnl
		Rps15a
		Msn
		Ikzf1
		Psmd1
		Anp32b
		Arpc4
		Pfn1
		Vdac1
		Snrnp40
		Nono
		Ahcy
		Ldha
		Flna
		H2-K1
		Sptbn1
		Smc3
		Eloc
		Hspd1
		Cacybp
		Ripor2
		H2-Aa
		Tomm22
		Phgdh
		Rpl22l1
		Sgta
		Cct5
		Pdia6
		Ppp3ca
		Ddx1
		Gstm1
		Ywhag
		Coro1b
		Rac2
		Glg1
		Serpina1e
		Itgb2
		Samhd1
		Nap1l1
		Atp5f1a
		Thumpd1
		Sypl1
		Rps13
		Ctsd
		Pzp
		Gsn
		Cox6b1
		Mug1
		Anxa5
		Rtn3
		Gdi2
		Tmod3
		Gimap4
		Cd79b
		Abi1
		Ndufs1
		M6pr
		Serpina3k
		Cbx3
		Dynll2
		Cbx5
		Dpysl2
		U2af1
		Supt5h
		Sf3b3
		Slc44a2
		Csde1
		P4hb
		Sssca1
		Hspa8
		Itga1
		Reep5
		Serpina1d
		Tln1
		Pbdc1
		Cct7
		Ppm1g
		Rbm8a
		Rpl34
		Hsp90aa1
		Trim28
		Cat
		Vat1
		Arpc2
		Gspt1
		S100a4
		Ncstn
		Ruvbl1
		Lgals3
		Psmd3
		Actr3
		Vcl
		Tufm
		Rps18
		Gns
		Arhgdib
		Mat2a
		Aars
		Rpl11
		Ywhaq
		Tnfaip8
		Sf3b4
		Clic1
		Pak2
		Cltc
		Actbl2
		Ywhab
		Rpl12
		Lcp1
		Fh
		Usp5
		Txnl1
		Cd79a
		Ube2n
		Nsfl1c
		Ptk2b
		Aldh2
		Ptprc
		Ywhah
		Sec31a
		Psmc1
		Cotl1
		Arpc3
		Ctsb
		Vwf
		Tagln
		Trap1
		Actn1
		Pcbp1
		Rhoa
		Ap1b1
		Pyhin1
		Mtpn
		Sptan1
WT vs WT CHK1i up total	121	Golga3
		Zpr1
		Mcam
		Pkia
		Tmed10
		Gabpa
		Ppia
		Rps6
		Mybbp1a
		Mapt
		Abce1
		Stom
		Sod3
		Plac9
		Bcap31
		Mllt10
		Lrp1
		S100a6
		Hsph1
		Gpkow
		Srsf6
		Bcas2
		Cd19
		Nop2
		Dnajc7
		Tfe3
		Macf1
		Safb
		Ddx5
		Reps1
		Ckb
		Plekho2
		Rabep1
		Prpf40a
		Hells
		Man2b1
		Eif3b
		Rbm25
		Npc2
		Ifitm3
		Cisd2
		Hnrnpa2b1
		Sh3bgrl
		Mical1
		Lmbrd1
		Nup93
		Akr1a1
		Ufm1
		Lmnb1
		Zbp1
		Smarcc2
		Zyx
		Ilf3
		Fkbp10
		Rabep2
		Clic4
		Timm10
		Sdf2l1
		Lamp2
		H2-D1
		Gga3
		Hnrnpa0
		Fkbp7
		Crcp
		Stip1
		Ranbp2
		Eif3g
		Grcc10
		Arhgap30
		Zcchc8
		Prkcsh
		Fga
		Ctsl
		Lgals3bp
		Usp9x
		Timm9
		Ptbp1
		Timm13
		Anxa2
		Grn
		Apoh
		Polr2d
		Mef2d
		Dohh
		Stx7
		Inppl1
		Med29
		U2af2
		Rab1A
		Rbm17
		Mtrex
		Ndufv2
		Hnrnpa1
		Plec
		Ranbp3
		Ctdp1
		Cav1
		Bag6
		Dbn1
		Fyb1
		Psap
		Gnai2
		Cdc5l
		Srrt
		Ubxn7
		Ssrp1
		Usp14
		Fabp5
		Des
		Rnase1
		Kpna4
		Lmna
		Ppp1r7
		Sparc
		Eif3d
		Fkbp1a
		Lamp1
		Lima1
		Sp1
		Aip
		Siglec1
REL vs WT up total	281	Serpinb1a
		Selenbp1
		Med10
		Sugt1
		Dhx9
		Tpt1
		Ruvbl2
		Ssu72
		Cand1
		Cnn2
		Luc7l2
		Htatsf1
		Psma4
		Plin3
		Rangap1
		Rprd1b
		Otub1
		Cct3
		Tardbp
		Pafah1b2
		Arcn1
		Ifi30
		Psmd11
		Glo1
		Polr2j
		Snrpe
		Capg
		Eif3i
		Camp
		Pip4k2a
		Serpinb6
		Bcl10
		Tagln2
		Urod
		Egfr
		Rnh1
		Limd2
		Mmrn1
		Bzw1
		Alb
		Acsf2
		Snx2
		Itgb1
		Rps5
		Polr1d
		Cbfb
		Sncg
		Apex1
		Arf3
		Mecp2
		Rtn4
		Ctsh
		Cse1l
		Apoc1
		Erp29
		Ppp1r12a
		Prdx2
		Stx8
		Dcps
		Gpi
		Aimp1
		C3
		Fam49b
		Eif3h
		Bag1
		Psmd2
		Ptpn6
		Dync1i2
		Vars
		Treml1
		Pacsin1
		Myl9
		Bag2
		Anp32e
		Rpl21
		Sucla2
		Myl4
		Eif2s1
		Ndufb3
		Swap70
		Serpina6
		Pml
		Wtap
		Ndufs8
		Ces1c
		Cct6a
		Dnajb11
		Pdlim2
		Apool
		S100a8
		Prorsd1
		Uba2
		Retnlg
		Pdcd6ip
		Pf4
		Jakmip1
		Arhgap1
		Napg
		Pgd
		Vapb
		Dars
		Hrg
		Rtn1
		Bub3
		Mycbp
		S100a9
		Twf2
		Prkar1a
		Vsir
		Lgmn
		Sf3a3
		Ftl1
		Rbbp7
		Fkbp2
		Acaa2
		Rcc2
		Ppid
		Phb
		Abi3
		Wfdc21
		Psma1
		Rpl18a
		Cct4
		H2afz
		Gpatch11
		Dlgap4
		Myl12b
		H2-DMa
		Paf1
		Glud1
		Cs
		Commd8
		Thbs1
		Hpcal1
		Ap2b1
		Grb2
		Fasn
		Etfb
		Rsu1
		Ltf
		Ostf1
		Ifi35
		Ctsz
		Bcam
		S100a10
		Tomm34
		Ggt5
		Abracl
		Got2
		Atp5i
		Emb
		Tpd52
		Lcn2
		Dffa
		Fgfr1op2
		Idh1
		Gng11
		Me2
		Apoa1
		Usp15
		Pld3
		Sae1
		Actg1
		Cope
		Rps9
		Gosr2
		Dctn2
		Rrp1
		Ilf2
		Rps14
		Rexo2
		Gid8
		Ptges3
		Selenoh
		Cnp
		Lum
		Pgam1
		Hexb
		Eif4a1
		Gmps
		Ppif
		Mcm7
		Mif
		Sri
		Pitpna
		Uchl5
		Uba1
		Kars
		Bpgm
		Plbd2
		Setd7
		Snx12
		Babam1
		Rps16
		Glod4
		Myl6b
		Dync1h1
		Gm2a
		Ca2
		Ece1
		Enpp4
		Rps27l
		Ezr
		Eif3f
		Aldh9a1
		Eif6
		Eif5
		Arpc5
		Coro7
		Mthfd1
		Prdx6
		Psmb10
		Ada
		Igkc
		Ube2v1
		Rpl35a
		Camk2d
		Sp100
		Serpinc1
		Pygb
		Apoa2
		Fabp4
		Psma5
		Api5
		Psmb8
		Chmp2a
		Psmd13
		H2afy
		Ly6d
		Rrm1
		Rps26
		Vapa
		Ngp
		Hdgfl3
		Myh11
		Gsto1
		Asrgl1
		Mcm5
		Kpna3
		Copb1
		Erp44
		Hspa1b
		Ctsc
		Pycard
		Psmb2
		Sdha
		Tra2b
		Nap1l4
		Rpl35
		Cnn3
		Hook3
		Eci1
		Dnajc9
		Psma6
		Hnrnpf
		Eif3l
		Luc7l3
		Dek
		Myl6
		Acp1
		Copb2
		Pafah1b1
		Bgn
		Csk
		Ide
		Eif3k
		Phpt1
		Lyz2
		Pdxk
		Map2k1
		Traf3ip3
		Ganab
		Rps23
		Apoc3
		Arpc1b
		Atp5l
		Kctd12
		Eif4e
		Adk
		Tubb2a
		Rps10

## Sheet: Venn REL T505A overlap upregula
Names	total	elements
Upregulated in REL-/- Upregulated in T505A	25	Hnrnpk_T118
		Nes_S688
		Itga4_S1028
		Hmga1_S102;S103
		Raver1_S576
		Dkc1_S455
		Nes_S1860;S1861
		Stub1_S20
		Rplp0_S307
		Rplp1_S101;S104
		Uba1_S4
		Fam103a1_S36
		Nes_S1837
		Npm1_S10
		Ahsg_S138
		Retreg2_T274;S276;S278
		Irf2bp1_S384
		Vgll4_S58
		Mphosph10_S164;S168
		Hmga1_S9
		Mphosph10_S164;S168;S172
		Epb41l3_S804
		Raver1_S626
		Elac2_S815
		Pou2f2_S55
Upregulated in T505A	209	Khsrp_S182
		Fnbp4_S507
		Cdv3_S90
		Znf703_S257
		Srsf3_S5
		Gpalpp1_S104;S121
		Rere_S642
		Akap12_S350
		Map4_S617
		Lin52_[T51/S52/S53]
		Rplp2_S102;S105
		Khsrp_S481
		Casc3_S145
		Ccdc12_S165
		Atf1_S196
		Rbm3_S143
		Nes_S731
		Bod1l_S2554
		Znf48_S387
		Serbp1_S25
		Bod1l_S2001
		Nucks1_S79;S75
		Eif4b_S498
		Ubap2l_S629
		Mfap1b_S52
		Bola1_S123
		Eif4b_S422
		Fip1l1_S235
		Nsrp1_S33
		Psip1_S106
		Nudt5_S10
		Clspn_[S42/S46]
		Rplp1_S104
		Acin1_S454;S428
		Nolc1_T594
		Stmn1_S16;S25
		Rplp2_S17
		Eif4ebp2_T41;T46
		Map4_S667
		Adgrl2_S1458
		Cfdp1_S80;S83;S84;S85
		Srsf2_S212;S208;[S220/S221]
		Eif4b_S422;T427
		Casc3_S65
		Nolc1_S701
		Srek1ip1_S143
		Bod1l_S3000
		Cfdp1_T129
		Eif4ebp1_[S99/S100]
		Ppp4r3b_S811
		Prrc2b_S387
		Eaf1_S165;S158
		Eif4ebp1_T69
		Hmga1_S36
		Hdgfl2_S640
		Hemgn_S103;S124
		Hemgn_S269
		Rere_S613
		Fnbp4_S120;S125;S128
		Srsf2_S191
		Parg_S256;S259
		Map4_S598
		Ccdc86_S283
		Ccdc97_[S210/S212/T215]
		Hmga1_T53
		Mmtag2_S232
		Prrc2b_S226
		Hbb-b1_S45
		Nufip2_S376
		Hdgf_[S132/S133]
		Kiaa1211_T852
		Slbp_S182
		Eif4b_S497;S498
		Znf703_S231
		Fundc1_S13
		Tcof1_T860;S853
		Rcsd1_T256
		Psme3_[T23/S24]
		Mrps36_S60
		Prrc2a_S342;S350
		Pdap1_S63
		Hdgf_S165
		Arpp19_[T22/S23]
		Hmga1_S99;S102;S103
		Ybx1_S163
		Ccdc86_S18
		Eif4ebp1_T45
		Snrpc_S17
		Cdc26_S42
		Fip1l1_S479
		Sec62_T375
		Gab1_S455
		Nolc1_T610;T613
		Prrc2a_[T377/S378]
		Nolc1_T594;T600
		Rplp2_S102
		Map4_S667;T658
		Fip1l1_S86
		Mki67_S2780
		Fam122a_S144
		Eaf1_S165;[T157/S158]
		Casc3_S262
		Prrc2a_S1667
		Isy1_S222
		Nsrp1_S254;S255
		Znf830_S187
		Fosl2_[S17/S19]
		Prrc2c_T1238;T1240
		Bod1l_S2920
		Rplp2_S105
		Srsf2_S206;S208;S212;[S220/S221]
		Szrd1_[S105/S107]
		Srrm2_S2535
		Polr3g_S158
		Hnrnpab_S260
		Pdap1_S60
		Fam122b_S119
		Ess2_T440
		Caprin1_S23
		Bod1l_S2841
		Nolc1_S585
		Zcchc9_S53
		Klf3_S91;[S98/S99/S100]
		Klf3_S249
		Bod1l_S2968
		Nucks1_S54;S58
		Psip1_S272;S274;T271
		Phactr4_[S174/S175/S176]
		Nolc1_T599
		Psip1_S272
		Eif4ebp1_T69;S100
		Eef1b_S106
		Rybp_S99
		Fip1l1_S88;S84
		Parg_[S135/T137]
		Znf148_S306
		Tfdp1_S23
		Jpt1_T54
		Ccdc86_S225;S252
		Nolc1_S312
		Pdap1_S60;S63
		Hypk_S38
		Map4_S785
		Q3TQI7_S261
		Serbp1_S197
		Ubap2l_S487
		Son_S256
		Srsf5_S226;S228;S230
		D10Wsu102e_[S142/S143/S145]
		Cdc42ep4_S140
		Lsp1_T166;S168;S180;S184
		Klf3_S91;S100
		Znf593_[S133/T134]
		Stmn1_S16
		Cenpu_S164
		Stmn1_S38
		Gpalpp1_S146
		Usp10_S359
		Jpt2_S97
		Scnm1_S182
		Prrc2c_S904;S901
		Hmga1_T53;S36
		Kiaa1211_S783
		Ybx3_S33;S52
		Klf3_S71
		Klf2_T243;S247
		Hemgn_S171;S158;T155
		Fnbp4_S472
		Map4_T847
		Srrm1_[S427/S429]
		Stmn1_S63
		Nolc1_S563
		Nucks1_S58;S61
		Ybx3_S2
		Srsf2_S189;S191
		Zranb2_S188
		Map4_[S517/S519]
		Eif4ebp2_T70
		Hexim1_[S98/T99]
		Ubap2l_S436
		Szrd1_S37;S39
		Nes_S977
		Srsf2_S187;S189;S191
		Pdap1_[Y17/T18]
		Ybx3_S52
		Hirip3_S396
		Ubap2l_[S473/S474]
		Ubap2l_S487;S497
		Hdgf_S132;S133
		Pdlim1_T146
		Naf1_S308
		Rcsd1_S333
		Jmjd1c_S459
		Nucks1_S181
		Pagr1a_S233;S236
		Eif4ebp2_T46
		Znf830_S342
		Fnbp4_S120
		Nucks1_S75;S79
		Nolc1_S646
		Rere_S679
		Eif4ebp2_S65
		Npm1_S252
		Jpt1_[S85/S88]
		Ppp4r2_S226
		Rrp15_S265
		Npm1_S70
		Eaf1_[T157/S158]
		Map4_S475
Upregulated in REL-/-	455	Tp53bp1_S268
		Ahsg_S309;S314
		Dpf2_T176
		Acaca_S29
		Wdr44_[S3/S5]
		Lbr_S101
		Ranbp2_S2729
		Scaf8_S617
		Smc3_S1067
		Smarcc2_S304;S306
		Cast_S15
		Canx_S553;[T561/S563]
		Q99M08_S19
		Nelfe_S51
		Hmga1_[S102/S103]
		Cavin2_S359;S363
		Map1b_S1260
		Fam129a_S601
		Fam76b_S193
		Tle3_[T285/S286]
		Ccnk_S325;S329
		Bin1_S298
		Slc9a1_S697
		Synpo2_S300
		Hdgfl3_S121;S122
		Thumpd1_S8
		Vcl_S290
		Il16_S967
		Flna_S2152
		Tbc1d5_S565
		Washc2_S388
		Smarcc1_S327;S329
		Npm1_S241
		Nsun2_S723
		Arap1_S232
		Add3_S681
		Bmp2k_S908
		Rabep1_S410;[S407/T408]
		Rabep1_S407;S410
		Syap1_T262
		Ppp6r2_T672
		Pdlim2_S199;[S204/S205]
		Cntrob_S63
		Slu7_S215
		Macf1_S3082;S3085
		Tlk1_[S133/S134]
		Nucb1_S456
		Flna_S2180
		Etv6_S215
		Cbx3_S93;S95
		Eif4g2_T507
		Alkbh5_[S384/S385]
		Hist1h1a_S2
		Zcchc8_T474
		Pag1_S247
		Mecp2_S80
		Ablim1_S396
		Set_S30
		Irf3_S135
		Ap3d1_S784
		Nfatc2_S860
		Mapk14_Y182
		Pgrmc1_S181
		Tagln2_S163
		Cdk11b_S115
		Hsp90aa1_S231
		Dffa_S314
		Macf1_[S3082/S3085]
		Eif2b5_S540
		Dek_S306;S308;S311;S312
		Anp32b_T265
		Pold3_S306
		Slc9a1_S801
		Nelfe_S115
		Tfeb_[T330/S331]
		Ythdc1_S146;T148
		Epsti1_S39
		Pacsin1_S346;[S345/Y347]
		Irf2bpl_S638
		Myc_T58;[S62/S64]
		Ing4_S150
		Pds5b_S1356
		Ranbp3_S40;S32;S33
		Myc_[S62/S64]
		Chd4_S1528
		Kctd12_S178
		Cbx5_S93
		Erbin_S599;S600
		Sh3kbp1_S553;S555
		Map1b_S1815
		Eef1d_S133
		Xrn2_S499;S501
		Serbp1_[S327/S329]
		Ep300_S1037
		Trim28_S601;[T599/S600]
		Cbx3_[S95/S97/S99];S95
		Usp7_S19
		Bnip2_S114
		Zyx_S336
		Usp8_S680
		Slc9a1_S790
		Znf185_[S18/S20]
		Thrap3_[S913/T914/S915]
		Snx17_S409
		Dok3_S274
		Slc9a3r1_S297;[S283/S285/S286]
		Acin1_[S838/T840]
		Zc3h14_S515
		Fmnl1_S184
		Prkar2b_S112
		Canx_[T561/S563]
		Foxo1_S284
		Ptges3_S113
		Dcaf5_S799
		Tns3_S769
		Map1b_S1438
		Taf12_S51
		Nsfl1c_S176
		Limch1_S973
		Pa2g4_S2
		Nfkb1_S940
		Limd1_S413
		Wrnip1_S65
		Trim28_T599;S598;S600
		Cbx3_S95;S97;S99
		Akap12_[S235/T236]
		Ppp1r11_S82;T80
		Pag1_[S348/S351]
		Pi4k2a_S47
		Hcfc1_S2030
		Hnrnpa1_S6
		Cfl1_S3
		Ikzf3_S42
		Snip1_[S89/S91]
		Fgfr1op_S160
		Ms4a1_S29
		Fli1_[T35/S39]
		Agfg1_T177;[S179/S181]
		Arid3a_S127
		Lcp1_S257
		Eif4g3_[S267/T269]
		Slc9a3r1_S275
		Tnfrsf13c_T163
		Mink1_S729
		Zcchc8_S429
		Fkbp15_S1159
		Ncoa3_S847
		Znf639_S60
		Srrm1_S260
		Myo9b_S1175
		Erbin_S869
		Fyb1_S561
		Synpo2_[T219/S220]
		Tceal3_S120
		Hdac2_S422;S424
		Hist1h1e_S102
		Tmem184b_S403
		Bach2_S314
		Srrm2_S1360;[T1370/S1372]
		Lrrfip1_S84
		Hnrnph1_S104
		Ppp1r12a_S870
		Sptbn1_S2102
		Nav1_S651
		Foxo1_S467
		Sept2_S218
		Ikzf1_S440
		Ubxn1_[S200/S202]
		Psma3_S250
		Yap1_[S46/T48]
		Rtn4_S16
		Thumpd1_S86;S88
		Dnmt1_S125
		Clint1_S324
		Anp32a_T15
		Ppp1r12a_[S445/Y446]
		Yap1_S149
		Nipbl_S280
		Marcks_T143
		Hist1h1d_[S2/T4]
		Canx_S582
		Myh11_S1954
		Znf609_S575;S577
		Hnrnpul2_S191
		Cobll1_T899
		Sh3kbp1_[S156/S159]
		Ablim1_S496
		Akap12_T583
		Sh3kbp1_S555
		Arhgef6_S639
		Znf185_[T64/S65]
		Fnbp1_S299
		Srsf1_S234;S242;S238
		Rgs3_S686
		Pphln1_S219
		Ranbp3_S283
		Srrm1_S723;S725;S731;S733
		Sipa1l3_S1538
		Srsf2_T25
		Pml_[T513/S514/S515]
		Akt1s1_T247
		Fam129a_S595
		Lsp1_S243
		Trim28_[S823/S824]
		Myh9_T1939;S1943
		Snrk_S569
		Srrm2_S2646
		Tns3_S752
		Pphln1_S154
		Ppig_S742;S743;T746
		Inpp5f_S908
		Ripor2_S582
		Treml1_[S228/S229]
		Bckdk_S31
		Erbin_S849
		Sash3_S38;S42
		Zc3h4_S1270;S1276
		Numa1_S398
		Plekho2_S236
		Tnik_S737
		Sash3_S320;T318
		Prkab1_S108
		Abi1_S225
		E4f1_S166
		Srrm1_S723;S725;S731
		Nucks1_T179
		Plekha6_S901
		Hsp90ab1_S255
		Sash3_S42
		Ly9_T647
		Elf1_S334
		Stab2_S2503
		Evi2b_[S295/S296]
		Sh3kbp1_[S630/S631/S633]
		Hnrnpu_S247
		Plekho2_S395
		Cbx3_S95
		Dbn1_[S141/S142]
		Pwp1_S49
		Iws1_S345
		Pea15_S116
		Sorbs2_[S381/S382]
		Sptan1_S1029
		Hsp90ab1_S226
		Apobr_S484
		Rabep2_S180
		Tbc1d5_S578
		Hsp90aa1_S263
		Slc9a3r1_[S263/S264]
		Dbnl_T299
		Myh9_[T1939/S1943]
		Evl_[S243/S244]
		Ptprc_S1229
		Map4k4_S701
		Arhgef6_S679
		Dennd1c_T696
		Cmtr1_S27
		Nucks1_S19
		Ppig_S685
		Stk4_S418
		Kpna3_S60
		Prpf4b_Y849
		Reps1_S561
		Znf609_S575
		Srrm2_[S1556/S1557]
		Myo18a_S2039
		Erbin_S1013
		Arid3a_[S77/S78]
		Ahsg_S309;S312;S314
		Filip1l_S1047
		Pxn_S83
		Hist1h3a_S29
		Ag2_S210
		Lamtor1_T28
		Fyb1_S546
		Tcf20_S612;S603
		Bcl10_S141
		Washc2_S613;S614
		Pml_[T527/S528]
		Ppp6r1_S531
		Nrbp1_S2
		Washc2_S747
		Eif5_S387;S388
		Rplp0_S304;S307
		Hist1h1b_[S2/T4]
		Rad9a_S385
		Vcl_S346
		Rabep1_S407
		Atn1_S630
		Rpl22l1_S118
		Lsp1_S273
		Map4k1_S370;[S375/Y379]
		Pdcd4_S94
		Arid3a_[S101/S102]
		Api5_S464
		Sash1_S163
		Sgta_T82
		Itsn1_S897
		Aak1_S729
		Son_S1723
		Hnrnpk_S284
		Mcm3_S668
		Lbh_S63
		Cic_S2284
		Pml_S515;[T513/S514]
		Ranbp3_[S58/T60]
		Myc_S164
		Atn1_T615
		Washc2_S1169;S1173;T1174
		Ufl1_S458
		Atp2b1_S1155
		Hmgn1_S7
		Htatsf1_S724
		Zc3hc1_S393
		Tnks1bp1_S429
		Dido1_T148;S149;S151
		Cic_S1809
		Rps3_T221
		Ensa_S109
		Bach2_S314;T323
		Ahsg_S312
		Polr2a_Y1874
		Sptbn1_S2340
		Dock2_S1729
		Eef1d_T147;S162
		Rere_S656
		Myh9_S1943
		Retreg3_S320;S313
		Ncoa1_S702
		Pdlim2_S204
		Washc2_S723
		Ptprc_S964
		Etv6_S22;T18
		Pml_S528
		Cdk13_[S1146/T1147]
		Acin1_S838
		Fkbp15_S1091
		Dbnl_[S277/T278/T279]
		Ncoa3_S720
		Washc2_S614
		Eif3b_S75
		Ppp1r11_[T80/S82]
		Tmx1_S245
		Washc2_S533
		Cfl1_T25
		P58686_S82
		Hnrnpul1_[Y720/S721]
		Tmpo_S157
		Denr_T69
		Otud4_S1016;S1017
		Ptms_S5
		Evl_S367
		Cbx3_S93
		Znf609_S845;S848;S841
		Ablim1_S475
		Atf7ip_S593
		Limch1_S377
		Strip1_S335
		Cep350_S1641
		Tnip1_S448
		Filip1l_S789
		Polr2a_S1920
		Mtss1l_S575
		Sp100_[S314/T316]
		Cbx1_S89
		Eif3j1_S14
		Kri1_S142
		Gtf2i_S674
		Pml_S536;S528
		Dpf2_S142
		Ppp1r9b_S99
		Abi1_S183
		Rbm26_S127
		Ranbp3_S40;S33
		Rbl1_S1036
		Prpf40a_S879;S881;S884
		Eef1d_S162
		Akap2_[S799/T801]
		Cstf2_S527
		Wnk1_S185
		Akap13_S1892
		Elf1_S187
		Rabep2_S176;T181
		Hist1h1c_S2
		Trim28_S752
		Nsfl1c_S114
		Epb41l2_S38
		Stk4_S320
		Edc3_S131
		Tpd52l2_S180
		Vasp_S317
		Fn1_S2475
		Ostf1_S214
		Pram1_S332
		Thrap3_S935
		Crtc2_S612
		Sash3_S7
		Prkar1a_S83
		Hdac1_S421;S423
		Pdlim2_S210
		Sh3kbp1_S227
		Pdlim2_S120;S143;T138
		Cdk5rap2_[S479/T481/S485]
		Hmga1_S2;S4
		Lsp1_T166;S168
		Wrnip1_S153
		Palld_S901
		Bin2_S463
		Tsc22d4_S298
		Rbm25_S672
		Htatsf1_S441
		Macf1_S4483
		Arhgap1_S51
		Srrm2_S2052;S2054
		Hspb1_S86
		Irf2bp1_S436
		Spag9_S364
		Pcnt_S1437
		Pias1_S503
		Sp110_S175
		Bank1_S11
		Irf2bpl_S526
		Lcp1_S5
		Bin2_[S391/S392]
		Cbx3_S93;S95;S97
		Crtc2_S457
		Eml4_S146
		Akap12_S505
		Glcci1_S293
		Tubb1_S435
		Arhgap27_S462;[S458/S459]
		Tpd52_S223
		Trim28_S51
		Stk10_S437
		Mef2c_S222
		Hist1h1e_S2
		Macf1_S3889
		Dennd1b_S632
		Ablim1_S738
		Cd2ap_S458
		Sp100_S190
		Irf2bpl_S636;S638
		Dock2_S1683
		Eif3b_S120;S123
		Srrm2_S2404
		Apobr_S520
		Hmgn3_S6
		Msh6_S63
		Dock8_[S903/S904/S905]
		Hnrnpa3_S359
		Pogz_S422
		Pphln1_S147
		Pml_S17
		Ppp1r12a_Y446
		Sh3kbp1_S274
