# Supplementary material for: Up-regulation of the PI3K/AKT and RHO/RAC/PAK signalling pathways in CHK1 inhibitor resistant Eµ-Myc lymphoma cells
Source: Biochem J. 2022 Oct 14;479(19):2131–51. doi: 10.1042/BCJ20220103 (PMC9704644; doi:10.1042/BCJ20220103)
Supplement: Supplementary Material 5 [file BCJ-479-2131-s5.pdf]

## Sheet: Description
STRING interactions data based on phosphorylated proteins identified from phospho proteomics analysis as being upregulated in Eμ-Myc Rel-/- lymphomas versus WT Eμ-Myc lymphomas (p-value <0.05, see Supp Data File XX). String search performed using 'Homo Sapiens' as the species setting with either Medium or High interaction confidence levels as indicated. The analysis was performed using the settin…
Tab 1: Analysis of STRING interactions between phospho proteins upregulated in Eμ-Myc Rel-/- lymphomas versus WT Eμ-Myc lymphomas (p-value <0.05) at Medium Confidence levels.
Tab 2: Analysis of STRING interactions between phospho proteins upregulated in Eμ-Myc Rel-/- lymphomas versus WT Eμ-Myc lymphomas (p-value <0.05) at High Confidence levels.
Tab 3: List of potential interactiosn identified the string analysis using the Medium confidence setting for AKT1, ERK1 (MAPK3), JNK1 (MAPK8) and p38 MAPK (MAPK14).
Tab 4: List of potential interactiosn identified the string analysis using the Medium confidence setting for AKT1, ERK1 (MAPK3), JNK1 (MAPK8) and p38 MAPK (MAPK14).
Tab 5: Table combining the data from Tabs 3 & 4

## Sheet: Medium Confidence
#node1	node2	node1_string_id	node2_string_id	neighborhood_on_chromosome	gene_fusion	phylogenetic_cooccurrence	homology	coexpression	experimentally_determined_interaction	database_annotated	automated_textmining	combined_score
AAK1	DBN1	9606.ENSP00000386456	9606.ENSP00000292385	0	0	0	0	0.066	0.363	0	0.208	0.487
AAK1	ITSN1	9606.ENSP00000386456	9606.ENSP00000370719	0	0	0	0	0.108	0.104	0.6	0.421	0.79
AAK1	DBNL	9606.ENSP00000386456	9606.ENSP00000417653	0	0	0	0	0.072	0.604	0	0.38	0.752
AAK1	REPS1	9606.ENSP00000386456	9606.ENSP00000392065	0	0	0	0	0	0.799	0.8	0.223	0.966
ABI1	VASP	9606.ENSP00000365312	9606.ENSP00000245932	0	0	0	0	0.065	0.533	0	0.745	0.879
ABI1	MAPK3	9606.ENSP00000365312	9606.ENSP00000263025	0	0	0	0	0.062	0	0.9	0.174	0.915
ABI1	MINK1	9606.ENSP00000365312	9606.ENSP00000347427	0	0	0	0	0	0.464	0	0.058	0.474
ABI1	SPTAN1	9606.ENSP00000365312	9606.ENSP00000361824	0	0	0	0	0.069	0.213	0	0.484	0.589
ABI1	EVL	9606.ENSP00000365312	9606.ENSP00000376652	0	0	0	0	0.065	0.429	0	0.189	0.529
ABI1	MYC	9606.ENSP00000365312	9606.ENSP00000479618	0	0	0	0	0	0.176	0	0.58	0.639
ABI1	FNBP1	9606.ENSP00000365312	9606.ENSP00000413625	0	0	0	0	0.062	0.21	0	0.757	0.804
ABI1	AKT1	9606.ENSP00000365312	9606.ENSP00000451828	0	0	0	0	0	0.143	0	0.808	0.829
ABI1	ITGA4	9606.ENSP00000365312	9606.ENSP00000380227	0	0	0	0	0	0.334	0.9	0.09	0.934
ABI1	HNRNPK	9606.ENSP00000365312	9606.ENSP00000365439	0	0	0	0	0.112	0.104	0	0.937	0.946
ABLIM1	TPD52L2	9606.ENSP00000277895	9606.ENSP00000217121	0	0	0	0	0	0	0	0.577	0.577
ABLIM1	ZYX	9606.ENSP00000277895	9606.ENSP00000324422	0	0	0	0.578	0	0.397	0	0.09	0.41
ABLIM1	MACF1	9606.ENSP00000277895	9606.ENSP00000354573	0	0	0	0	0.062	0.18	0	0.377	0.479
ACACA	PRKAB1	9606.ENSP00000483300	9606.ENSP00000229328	0	0	0	0	0.062	0.27	0.9	0.412	0.954
ACACA	FOXO1	9606.ENSP00000483300	9606.ENSP00000368880	0	0	0	0	0	0.078	0	0.45	0.471
ACACA	AKT1	9606.ENSP00000483300	9606.ENSP00000451828	0	0	0	0	0	0	0	0.46	0.46
ACIN1	PIAS1	9606.ENSP00000262710	9606.ENSP00000249636	0	0	0	0	0.088	0	0	0.733	0.746
ACIN1	SRSF1	9606.ENSP00000262710	9606.ENSP00000258962	0	0	0	0	0.286	0	0	0.415	0.565
ACIN1	RBM25	9606.ENSP00000262710	9606.ENSP00000261973	0	0	0	0	0.188	0	0	0.309	0.415
ACIN1	RAVER1	9606.ENSP00000262710	9606.ENSP00000293677	0	0	0	0	0.101	0	0	0.362	0.402
ACIN1	THRAP3	9606.ENSP00000262710	9606.ENSP00000346634	0	0	0	0	0.105	0.129	0	0.348	0.447
ACIN1	HNRNPA1	9606.ENSP00000262710	9606.ENSP00000341826	0	0	0	0	0.237	0.206	0	0.172	0.455
ACIN1	HNRNPUL2	9606.ENSP00000262710	9606.ENSP00000301785	0	0	0	0	0.108	0	0	0.433	0.473
ACIN1	HNRNPH1	9606.ENSP00000262710	9606.ENSP00000349168	0	0	0	0	0.286	0.27	0	0.176	0.533
ACIN1	HNRNPUL1	9606.ENSP00000262710	9606.ENSP00000375863	0	0	0	0	0.129	0	0	0.531	0.575
ACIN1	PRPF40A	9606.ENSP00000262710	9606.ENSP00000386458	0	0	0	0	0.147	0.681	0	0.09	0.731
ACIN1	SNIP1	9606.ENSP00000262710	9606.ENSP00000296215	0	0	0	0	0.084	0.67	0	0.202	0.737
ACIN1	SRRM1	9606.ENSP00000262710	9606.ENSP00000326261	0	0	0	0	0.318	0.39	0	0.447	0.75
ACIN1	HNRNPU	9606.ENSP00000262710	9606.ENSP00000283179	0	0	0	0	0.145	0	0	0.885	0.898
ACIN1	SRRM2	9606.ENSP00000262710	9606.ENSP00000301740	0	0	0	0	0.775	0.681	0	0.432	0.955
ACIN1	API5	9606.ENSP00000262710	9606.ENSP00000431391	0	0	0	0	0.119	0.412	0	0.955	0.975
ADD3	SPTAN1	9606.ENSP00000348381	9606.ENSP00000361824	0	0	0	0	0.068	0	0	0.43	0.446
ADD3	MARCKS	9606.ENSP00000348381	9606.ENSP00000478061	0	0	0	0	0	0	0	0.572	0.572
ADD3	SPTBN1	9606.ENSP00000348381	9606.ENSP00000349259	0	0	0	0	0.08	0.058	0	0.557	0.583
AGFG1	LRRFIP1	9606.ENSP00000387282	9606.ENSP00000375857	0	0	0	0	0.042	0	0	0.401	0.401
AGFG1	DBNL	9606.ENSP00000387282	9606.ENSP00000417653	0	0	0	0	0	0.484	0	0	0.484
AGFG1	TBC1D5	9606.ENSP00000387282	9606.ENSP00000402935	0	0	0	0	0.082	0	0	0.463	0.486
AGR2	TMX1	9606.ENSP00000391490	9606.ENSP00000393316	0	0	0	0	0	0	0	0.468	0.468
AHSG	FN1	9606.ENSP00000393887	9606.ENSP00000346839	0	0	0	0	0.087	0	0	0.39	0.419
AKAP12	MAP1B	9606.ENSP00000384537	9606.ENSP00000296755	0	0	0	0	0.294	0	0	0.19	0.404
AKAP12	SRRM2	9606.ENSP00000384537	9606.ENSP00000301740	0	0	0	0	0	0	0	0.508	0.508
AKAP12	AKAP13	9606.ENSP00000384537	9606.ENSP00000354718	0	0	0	0	0	0	0	0.758	0.759
AKAP12	PEA15	9606.ENSP00000384537	9606.ENSP00000357055	0	0	0	0	0.063	0	0	0.455	0.467
AKAP12	MARCKS	9606.ENSP00000384537	9606.ENSP00000478061	0	0	0	0	0.069	0	0	0.415	0.432
AKAP12	AKAP2	9606.ENSP00000384537	9606.ENSP00000404782	0	0	0	0	0.088	0	0	0.552	0.574
AKAP12	PALLD	9606.ENSP00000384537	9606.ENSP00000425556	0	0	0	0	0.32	0	0	0.444	0.605
AKAP13	MAPK14	9606.ENSP00000354718	9606.ENSP00000229795	0	0	0	0	0	0.101	0	0.598	0.623
AKAP13	SPAG9	9606.ENSP00000354718	9606.ENSP00000262013	0	0	0	0	0.063	0	0	0.474	0.486
AKAP13	PRKAR2B	9606.ENSP00000354718	9606.ENSP00000265717	0	0	0	0	0.062	0.205	0.9	0.562	0.962
AKAP13	BNIP2	9606.ENSP00000354718	9606.ENSP00000267859	0	0	0	0	0	0	0	0.748	0.748
AKAP13	SORBS2	9606.ENSP00000354718	9606.ENSP00000347852	0	0	0	0	0.062	0.383	0	0.047	0.4
AKAP13	FLNA	9606.ENSP00000354718	9606.ENSP00000358866	0	0	0	0	0.062	0.07	0	0.378	0.41
AKAP13	PRKAR1A	9606.ENSP00000354718	9606.ENSP00000376475	0	0	0	0	0.062	0.056	0	0.399	0.421
AKAP13	MYO9B	9606.ENSP00000354718	9606.ENSP00000471457	0	0	0	0	0.062	0.167	0	0.338	0.438
AKAP13	PALLD	9606.ENSP00000354718	9606.ENSP00000425556	0	0	0	0	0	0	0	0.443	0.443
AKAP13	AKAP2	9606.ENSP00000354718	9606.ENSP00000404782	0	0	0	0	0	0	0	0.73	0.73
AKAP13	AKAP12	9606.ENSP00000354718	9606.ENSP00000384537	0	0	0	0	0	0	0	0.758	0.759
AKAP2	GLCCI1	9606.ENSP00000404782	9606.ENSP00000223145	0	0	0	0	0	0	0	0.414	0.414
AKAP2	PRKAR2B	9606.ENSP00000404782	9606.ENSP00000265717	0	0	0	0	0	0.647	0	0.432	0.791
AKAP2	AKAP13	9606.ENSP00000404782	9606.ENSP00000354718	0	0	0	0	0	0	0	0.73	0.73
AKAP2	FLNA	9606.ENSP00000404782	9606.ENSP00000358866	0	0	0	0	0.068	0.482	0	0.06	0.507
AKAP2	PRKAR1A	9606.ENSP00000404782	9606.ENSP00000376475	0	0	0	0	0	0.614	0	0.153	0.659
AKAP2	AKAP12	9606.ENSP00000404782	9606.ENSP00000384537	0	0	0	0	0.088	0	0	0.552	0.574
AKAP2	PPP1R12A	9606.ENSP00000404782	9606.ENSP00000389168	0	0	0	0	0	0	0	0.454	0.454
AKT1	VCL	9606.ENSP00000451828	9606.ENSP00000211998	0	0	0	0	0.063	0	0	0.712	0.719
AKT1	MYH9	9606.ENSP00000451828	9606.ENSP00000216181	0	0	0	0	0.088	0.295	0	0.403	0.583
AKT1	STUB1	9606.ENSP00000451828	9606.ENSP00000219548	0	0	0	0	0.077	0.519	0	0.633	0.823
AKT1	NFKB1	9606.ENSP00000451828	9606.ENSP00000226574	0	0	0	0	0.066	0.176	0.9	0.526	0.958
AKT1	PRKAB1	9606.ENSP00000451828	9606.ENSP00000229328	0	0	0	0	0	0.114	0	0.426	0.47
AKT1	MAPK14	9606.ENSP00000451828	9606.ENSP00000229795	0	0	0.303	0.623	0.083	0.83	0.6	0.769	0.956
AKT1	VASP	9606.ENSP00000451828	9606.ENSP00000245932	0	0	0	0	0.062	0.132	0	0.568	0.618
AKT1	CANX	9606.ENSP00000451828	9606.ENSP00000247461	0	0	0	0	0	0.057	0	0.478	0.486
AKT1	HSPB1	9606.ENSP00000451828	9606.ENSP00000248553	0	0	0	0	0	0.76	0	0.982	0.995
AKT1	ARHGEF6	9606.ENSP00000451828	9606.ENSP00000250617	0	0	0	0	0.079	0.056	0	0.387	0.42
AKT1	WDR44	9606.ENSP00000451828	9606.ENSP00000254029	0	0	0	0	0	0	0	0.418	0.418
AKT1	DOCK2	9606.ENSP00000451828	9606.ENSP00000256935	0	0	0	0	0	0.057	0	0.918	0.92
AKT1	SRSF1	9606.ENSP00000451828	9606.ENSP00000258962	0	0	0	0	0.06	0.056	0	0.392	0.413
AKT1	PPIG	9606.ENSP00000451828	9606.ENSP00000260970	0	0	0	0	0	0.058	0	0.391	0.401
AKT1	SPAG9	9606.ENSP00000451828	9606.ENSP00000262013	0	0	0	0	0	0.057	0	0.893	0.895
AKT1	SLC9A3R1	9606.ENSP00000451828	9606.ENSP00000262613	0	0	0	0	0.062	0.327	0	0.391	0.582
AKT1	MAPK3	9606.ENSP00000451828	9606.ENSP00000263025	0	0	0.323	0.586	0.066	0.148	0.8	0.938	0.906
AKT1	EP300	9606.ENSP00000451828	9606.ENSP00000263253	0	0	0	0	0	0.885	0.9	0.903	0.998
AKT1	SLC9A1	9606.ENSP00000451828	9606.ENSP00000263980	0	0	0	0	0.065	0.298	0	0.552	0.681
AKT1	PXN	9606.ENSP00000451828	9606.ENSP00000267257	0	0	0	0	0.083	0.063	0	0.874	0.883
AKT1	PML	9606.ENSP00000451828	9606.ENSP00000268058	0	0	0	0	0	0.057	0.9	0.654	0.964
AKT1	EIF2B5	9606.ENSP00000451828	9606.ENSP00000273783	0	0	0	0	0.06	0.057	0	0.438	0.459
AKT1	LAMTOR1	9606.ENSP00000451828	9606.ENSP00000278671	0	0	0	0	0.048	0	0.9	0.26	0.923
AKT1	PDCD4	9606.ENSP00000451828	9606.ENSP00000280154	0	0	0	0	0	0	0	0.635	0.635
AKT1	NPM1	9606.ENSP00000451828	9606.ENSP00000296930	0	0	0	0	0	0.285	0	0.714	0.788
AKT1	PA2G4	9606.ENSP00000451828	9606.ENSP00000302886	0	0	0	0	0	0.27	0	0.905	0.928
AKT1	ARHGAP1	9606.ENSP00000451828	9606.ENSP00000310491	0	0	0	0	0.062	0.056	0	0.602	0.617
AKT1	EPSTI1	9606.ENSP00000451828	9606.ENSP00000318982	0	0	0	0	0	0.059	0	0.435	0.445
AKT1	EML4	9606.ENSP00000451828	9606.ENSP00000320663	0	0	0	0	0	0.071	0	0.565	0.578
AKT1	ZYX	9606.ENSP00000451828	9606.ENSP00000324422	0	0	0	0	0.098	0.078	0	0.39	0.448
AKT1	FMNL1	9606.ENSP00000451828	9606.ENSP00000329219	0	0	0	0	0.062	0.119	0	0.703	0.733
AKT1	HSP90AA1	9606.ENSP00000451828	9606.ENSP00000335153	0	0	0	0	0.062	0.946	0.9	0.991	0.999
AKT1	MEF2C	9606.ENSP00000451828	9606.ENSP00000340874	0	0	0	0	0.049	0.076	0.9	0.428	0.943
AKT1	HNRNPA1	9606.ENSP00000451828	9606.ENSP00000341826	0	0	0	0	0	0.078	0	0.469	0.489
AKT1	USP7	9606.ENSP00000451828	9606.ENSP00000343535	0	0	0	0	0.062	0.058	0	0.416	0.439
AKT1	FN1	9606.ENSP00000451828	9606.ENSP00000346839	0	0	0	0	0.051	0	0	0.776	0.778
AKT1	TFEB	9606.ENSP00000451828	9606.ENSP00000351742	0	0	0	0	0.062	0.057	0	0.504	0.523
AKT1	CD2AP	9606.ENSP00000451828	9606.ENSP00000352264	0	0	0	0	0	0.282	0	0.292	0.47
AKT1	DNMT1	9606.ENSP00000451828	9606.ENSP00000352516	0	0	0	0	0	0.27	0	0.559	0.664
AKT1	PEA15	9606.ENSP00000451828	9606.ENSP00000357055	0	0	0	0	0	0.231	0	0.39	0.51
AKT1	NES	9606.ENSP00000451828	9606.ENSP00000357206	0	0	0	0	0.062	0	0	0.595	0.603
AKT1	CRTC2	9606.ENSP00000451828	9606.ENSP00000357622	0	0	0	0	0.069	0.058	0.8	0.424	0.885
AKT1	DKC1	9606.ENSP00000451828	9606.ENSP00000358563	0	0	0	0	0	0.089	0.9	0.148	0.915
AKT1	FLNA	9606.ENSP00000451828	9606.ENSP00000358866	0	0	0	0	0.117	0.102	0	0.643	0.693
AKT1	BCL10	9606.ENSP00000451828	9606.ENSP00000359612	0	0	0	0	0	0.658	0	0.419	0.793
AKT1	HSP90AB1	9606.ENSP00000451828	9606.ENSP00000360609	0	0	0	0	0.062	0.819	0.6	0.78	0.983
AKT1	NCOA3	9606.ENSP00000451828	9606.ENSP00000361066	0	0	0	0	0	0	0	0.602	0.602
AKT1	STK4	9606.ENSP00000451828	9606.ENSP00000361892	0	0	0.364	0.613	0.065	0.281	0	0.579	0.523
AKT1	HDAC1	9606.ENSP00000451828	9606.ENSP00000362649	0	0	0	0	0	0.078	0	0.598	0.614
AKT1	ABI1	9606.ENSP00000451828	9606.ENSP00000365312	0	0	0	0	0	0.143	0	0.808	0.829
AKT1	FOXO1	9606.ENSP00000451828	9606.ENSP00000368880	0	0	0	0	0.048	0.889	0.9	0.859	0.998
AKT1	TP53BP1	9606.ENSP00000451828	9606.ENSP00000371475	0	0	0	0	0.062	0	0	0.391	0.404
AKT1	AKT1S1	9606.ENSP00000451828	9606.ENSP00000375711	0	0	0	0	0.091	0.687	0.9	0.781	0.992
AKT1	MAPK8	9606.ENSP00000451828	9606.ENSP00000378974	0	0	0.417	0.573	0.084	0.315	0	0.81	0.642
AKT1	NFATC2	9606.ENSP00000451828	9606.ENSP00000379330	0	0	0	0	0	0	0	0.401	0.401
AKT1	USP8	9606.ENSP00000451828	9606.ENSP00000379721	0	0	0	0	0.055	0.281	0.9	0.267	0.943
AKT1	LCP1	9606.ENSP00000451828	9606.ENSP00000381581	0	0	0	0	0	0.102	0	0.45	0.485
AKT1	PPP1R12A	9606.ENSP00000451828	9606.ENSP00000389168	0	0	0	0	0.063	0.12	0	0.416	0.476
AKT1	PTPRC	9606.ENSP00000451828	9606.ENSP00000411355	0	0	0	0	0.062	0.078	0	0.618	0.641
AKT1	PALLD	9606.ENSP00000451828	9606.ENSP00000425556	0	0	0	0	0	0	0	0.617	0.617
AKT1	HDAC2	9606.ENSP00000451828	9606.ENSP00000430432	0	0	0	0	0	0.078	0	0.547	0.565
AKT1	CFL1	9606.ENSP00000451828	9606.ENSP00000432660	0	0	0	0	0.12	0.079	0	0.666	0.706
AKT1	MARCKS	9606.ENSP00000451828	9606.ENSP00000478061	0	0	0	0	0	0	0	0.424	0.424
AKT1	GTF2I	9606.ENSP00000451828	9606.ENSP00000460070	0	0	0	0	0	0	0	0.454	0.454
AKT1	ACACA	9606.ENSP00000451828	9606.ENSP00000483300	0	0	0	0	0	0	0	0.46	0.46
AKT1	PACSIN1	9606.ENSP00000451828	9606.ENSP00000484060	0	0	0	0	0	0.057	0	0.451	0.461
AKT1	IRF3	9606.ENSP00000451828	9606.ENSP00000471896	0	0	0	0	0.046	0.281	0	0.469	0.604
AKT1	YAP1	9606.ENSP00000451828	9606.ENSP00000478927	0	0	0	0	0.062	0.243	0	0.58	0.675
AKT1	DENND1B	9606.ENSP00000451828	9606.ENSP00000479816	0	0	0	0	0	0	0.9	0	0.9
AKT1	PTGES3	9606.ENSP00000451828	9606.ENSP00000482075	0	0	0	0	0	0.057	0.9	0.449	0.943
AKT1	MYC	9606.ENSP00000451828	9606.ENSP00000479618	0	0	0	0	0.051	0.143	0.9	0.859	0.987
AKT1S1	SGTA	9606.ENSP00000375711	9606.ENSP00000221566	0	0	0	0	0.092	0	0	0.55	0.574
AKT1S1	PRKAB1	9606.ENSP00000375711	9606.ENSP00000229328	0	0	0	0	0.062	0	0.6	0.147	0.652
AKT1S1	MAPK3	9606.ENSP00000375711	9606.ENSP00000263025	0	0	0	0	0.108	0	0	0.526	0.56
AKT1S1	PML	9606.ENSP00000375711	9606.ENSP00000268058	0	0	0	0	0	0	0.9	0	0.9
AKT1S1	LAMTOR1	9606.ENSP00000375711	9606.ENSP00000278671	0	0	0	0	0.063	0	0.6	0.418	0.763
AKT1S1	WNK1	9606.ENSP00000375711	9606.ENSP00000341292	0	0	0	0	0	0	0	0.513	0.513
AKT1S1	FOXO1	9606.ENSP00000375711	9606.ENSP00000368880	0	0	0	0	0	0	0	0.559	0.559
AKT1S1	MYC	9606.ENSP00000375711	9606.ENSP00000479618	0	0	0	0	0.065	0	0	0.418	0.433
AKT1S1	AKT1	9606.ENSP00000375711	9606.ENSP00000451828	0	0	0	0	0.091	0.687	0.9	0.781	0.992
ALKBH5	NSUN2	9606.ENSP00000382091	9606.ENSP00000264670	0	0	0	0	0.067	0	0	0.613	0.624
ALKBH5	YTHDC1	9606.ENSP00000382091	9606.ENSP00000339245	0	0	0	0	0.059	0	0	0.89	0.892
ALKBH5	SRSF2	9606.ENSP00000382091	9606.ENSP00000376276	0	0	0	0	0.073	0	0	0.404	0.424
ANP32A	RANBP2	9606.ENSP00000417864	9606.ENSP00000283195	0	0	0	0	0.07	0	0	0.637	0.648
ANP32A	MAP1B	9606.ENSP00000417864	9606.ENSP00000296755	0	0	0	0	0.062	0.298	0	0.888	0.92
ANP32A	E4F1	9606.ENSP00000417864	9606.ENSP00000301727	0	0	0	0	0	0.336	0	0.48	0.64
ANP32A	ENSA	9606.ENSP00000417864	9606.ENSP00000341743	0	0	0	0	0.062	0	0	0.393	0.406
ANP32A	HNRNPA1	9606.ENSP00000417864	9606.ENSP00000341826	0	0	0	0	0.315	0	0	0.165	0.403
ANP32A	ANP32B	9606.ENSP00000417864	9606.ENSP00000345848	0	0	0	0.967	0.1	0.706	0	0.825	0.732
ANP32A	HNRNPH1	9606.ENSP00000417864	9606.ENSP00000349168	0	0	0	0	0.271	0.27	0	0.079	0.467
ANP32A	SET	9606.ENSP00000417864	9606.ENSP00000361777	0	0	0	0	0.296	0.682	0.9	0.916	0.997
ANP32A	HDAC1	9606.ENSP00000417864	9606.ENSP00000362649	0	0	0	0	0.177	0.182	0	0.453	0.6
ANP32A	HNRNPK	9606.ENSP00000417864	9606.ENSP00000365439	0	0	0	0	0.302	0	0	0.203	0.42
ANP32A	DEK	9606.ENSP00000417864	9606.ENSP00000380414	0	0	0	0	0.17	0	0	0.608	0.66
ANP32A	HIST1H3A	9606.ENSP00000417864	9606.ENSP00000480826	0	0	0	0	0.064	0.486	0	0	0.498
ANP32B	CDK13	9606.ENSP00000345848	9606.ENSP00000181839	0	0	0	0	0.046	0	0	0.433	0.435
ANP32B	BANK1	9606.ENSP00000345848	9606.ENSP00000320509	0	0	0	0	0	0	0	0.52	0.52
ANP32B	HTATSF1	9606.ENSP00000345848	9606.ENSP00000442699	0	0	0	0	0.062	0	0	0.438	0.45
ANP32B	SET	9606.ENSP00000345848	9606.ENSP00000361777	0	0	0	0	0.363	0.058	0	0.39	0.602
ANP32B	ANP32A	9606.ENSP00000345848	9606.ENSP00000417864	0	0	0	0.967	0.1	0.706	0	0.825	0.732
AP3D1	SRRM2	9606.ENSP00000347416	9606.ENSP00000301740	0	0	0	0	0.086	0	0	0.653	0.669
AP3D1	DCAF5	9606.ENSP00000347416	9606.ENSP00000341351	0	0	0	0	0	0	0	0.666	0.666
AP3D1	PI4K2A	9606.ENSP00000347416	9606.ENSP00000359665	0	0	0	0	0.062	0	0	0.402	0.415
AP3D1	ITSN1	9606.ENSP00000347416	9606.ENSP00000370719	0	0	0	0	0.073	0.248	0	0.342	0.501
AP3D1	HTATSF1	9606.ENSP00000347416	9606.ENSP00000442699	0	0	0	0	0	0.271	0	0.653	0.736
API5	RBM25	9606.ENSP00000431391	9606.ENSP00000261973	0	0	0	0	0.459	0	0	0.59	0.769
API5	ACIN1	9606.ENSP00000431391	9606.ENSP00000262710	0	0	0	0	0.119	0.412	0	0.955	0.975
API5	RAD9A	9606.ENSP00000431391	9606.ENSP00000311360	0	0	0	0	0.054	0	0	0.436	0.443
API5	HNRNPH1	9606.ENSP00000431391	9606.ENSP00000349168	0	0	0	0	0.239	0.27	0	0.058	0.431
API5	HNRNPK	9606.ENSP00000431391	9606.ENSP00000365439	0	0	0	0	0.186	0.397	0	0.054	0.495
API5	SRSF2	9606.ENSP00000431391	9606.ENSP00000376276	0	0	0	0	0.474	0	0	0	0.474
APOBR	PDS5B	9606.ENSP00000457539	9606.ENSP00000313851	0	0	0	0	0	0	0	0.469	0.469
APOBR	BIN1	9606.ENSP00000457539	9606.ENSP00000316779	0	0	0	0	0	0	0.54	0	0.54
APOBR	RABEP2	9606.ENSP00000457539	9606.ENSP00000350934	0	0	0	0	0	0	0	0.491	0.491
ARAP1	MTSS1L	9606.ENSP00000377233	9606.ENSP00000341171	0	0	0	0	0.062	0	0	0.391	0.404
ARAP1	SH3KBP1	9606.ENSP00000377233	9606.ENSP00000380921	0	0	0	0	0.059	0.875	0	0.846	0.98
ARHGAP1	BNIP2	9606.ENSP00000310491	9606.ENSP00000267859	0	0	0	0.659	0	0.779	0	0.826	0.84
ARHGAP1	CLINT1	9606.ENSP00000310491	9606.ENSP00000429824	0	0	0	0	0	0	0	0.442	0.442
ARHGAP1	FAM134A	9606.ENSP00000310491	9606.ENSP00000395249	0	0	0	0	0	0	0	0.604	0.604
ARHGAP1	UBA1	9606.ENSP00000310491	9606.ENSP00000338413	0	0	0	0	0	0.608	0	0	0.608
ARHGAP1	AKT1	9606.ENSP00000310491	9606.ENSP00000451828	0	0	0	0	0.062	0.056	0	0.602	0.617
ARHGAP27	PXN	9606.ENSP00000403323	9606.ENSP00000267257	0	0	0	0	0	0.241	0	0.289	0.437
ARHGAP27	SYNPO2	9606.ENSP00000403323	9606.ENSP00000306015	0	0	0	0	0	0.241	0	0.379	0.508
ARHGAP27	PDLIM2	9606.ENSP00000403323	9606.ENSP00000312634	0	0	0	0	0	0.241	0	0.289	0.437
ARHGAP27	LIMCH1	9606.ENSP00000403323	9606.ENSP00000316891	0	0	0	0	0.062	0.265	0	0.298	0.473
ARHGAP27	FMNL1	9606.ENSP00000403323	9606.ENSP00000329219	0	0	0	0	0.145	0.345	0	0.39	0.628
ARHGAP27	FILIP1L	9606.ENSP00000403323	9606.ENSP00000346560	0	0	0	0	0	0	0	0.52	0.52
ARHGAP27	SH3KBP1	9606.ENSP00000403323	9606.ENSP00000380921	0	0	0	0	0	0.375	0	0.839	0.895
ARHGAP27	ZNF185	9606.ENSP00000403323	9606.ENSP00000440847	0	0	0	0	0.062	0.265	0	0.298	0.473
ARHGAP27	MYO9B	9606.ENSP00000403323	9606.ENSP00000471457	0	0	0	0.556	0.081	0.452	0	0.525	0.592
ARHGEF6	GTF2I	9606.ENSP00000250617	9606.ENSP00000460070	0	0	0	0	0	0	0	0.408	0.408
ARHGEF6	AKT1	9606.ENSP00000250617	9606.ENSP00000451828	0	0	0	0	0.079	0.056	0	0.387	0.42
ARHGEF6	DOCK2	9606.ENSP00000250617	9606.ENSP00000256935	0	0	0	0	0.152	0	0	0.397	0.467
ARHGEF6	FN1	9606.ENSP00000250617	9606.ENSP00000346839	0	0	0	0	0	0	0	0.482	0.482
ARHGEF6	PXN	9606.ENSP00000250617	9606.ENSP00000267257	0	0	0	0	0.06	0.425	0.9	0.67	0.979
ARID3A	PIAS1	9606.ENSP00000263620	9606.ENSP00000249636	0	0	0	0	0.062	0.289	0	0.187	0.411
ARID3A	SMARCC1	9606.ENSP00000263620	9606.ENSP00000254480	0	0	0	0	0.1	0.248	0	0.229	0.433
ARID3A	SP100	9606.ENSP00000263620	9606.ENSP00000343023	0	0	0	0	0.08	0.27	0	0.192	0.41
ARID3A	SMARCC2	9606.ENSP00000263620	9606.ENSP00000267064	0	0	0	0	0.231	0.248	0	0.157	0.47
ARID3A	GTF2I	9606.ENSP00000263620	9606.ENSP00000460070	0	0	0	0	0	0	0	0.694	0.694
ATF7IP	EP300	9606.ENSP00000440440	9606.ENSP00000263253	0	0	0	0	0.088	0	0	0.422	0.451
ATF7IP	CBX1	9606.ENSP00000440440	9606.ENSP00000377060	0	0	0	0	0	0	0	0.545	0.545
ATN1	RERE	9606.ENSP00000349076	9606.ENSP00000338629	0	0	0	0.862	0.116	0.416	0	0.655	0.51
ATN1	PACSIN1	9606.ENSP00000349076	9606.ENSP00000484060	0	0	0	0	0.075	0	0	0.428	0.448
ATN1	CIC	9606.ENSP00000349076	9606.ENSP00000458663	0	0	0	0	0.311	0	0	0.328	0.517
ATN1	HDAC2	9606.ENSP00000349076	9606.ENSP00000430432	0	0	0	0	0	0.157	0.5	0.267	0.664
ATN1	HDAC1	9606.ENSP00000349076	9606.ENSP00000362649	0	0	0	0	0	0.157	0.5	0.308	0.683
ATN1	CHD4	9606.ENSP00000349076	9606.ENSP00000349508	0	0	0	0	0.064	0	0.65	0.142	0.694
ATP2B1	CANX	9606.ENSP00000392043	9606.ENSP00000247461	0	0	0	0	0.063	0.303	0	0.187	0.423
BACH2	FOXO1	9606.ENSP00000257749	9606.ENSP00000368880	0	0	0	0	0.062	0	0	0.398	0.411
BACH2	IKZF1	9606.ENSP00000257749	9606.ENSP00000331614	0	0	0	0	0.062	0.056	0	0.455	0.475
BANK1	NFKB1	9606.ENSP00000320509	9606.ENSP00000226574	0	0	0	0	0	0.058	0	0.482	0.491
BANK1	TNIP1	9606.ENSP00000320509	9606.ENSP00000317891	0	0	0	0	0	0	0	0.557	0.557
BANK1	SASH3	9606.ENSP00000320509	9606.ENSP00000349359	0	0	0	0	0.136	0	0	0.366	0.429
BANK1	MS4A1	9606.ENSP00000320509	9606.ENSP00000433277	0	0	0	0	0.365	0	0	0.246	0.501
BANK1	ANP32B	9606.ENSP00000320509	9606.ENSP00000345848	0	0	0	0	0	0	0	0.52	0.52
BCKDK	MAP4K1	9606.ENSP00000378405	9606.ENSP00000465039	0	0	0	0	0.052	0	0	0.587	0.592
BCL10	NFKB1	9606.ENSP00000359612	9606.ENSP00000226574	0	0	0	0	0.065	0.057	0.65	0.388	0.786
BCL10	MAPK14	9606.ENSP00000359612	9606.ENSP00000229795	0	0	0	0	0	0	0.6	0.196	0.664
BCL10	MAPK3	9606.ENSP00000359612	9606.ENSP00000263025	0	0	0	0	0.062	0	0.8	0.252	0.847
BCL10	BNIP2	9606.ENSP00000359612	9606.ENSP00000267859	0	0	0	0	0	0	0	0.439	0.439
BCL10	TNFRSF13C	9606.ENSP00000359612	9606.ENSP00000291232	0	0	0	0	0	0	0	0.45	0.45
BCL10	IKZF1	9606.ENSP00000359612	9606.ENSP00000331614	0	0	0	0	0	0	0	0.432	0.432
BCL10	FYB	9606.ENSP00000359612	9606.ENSP00000427114	0	0	0	0	0	0.27	0	0.49	0.611
BCL10	AKT1	9606.ENSP00000359612	9606.ENSP00000451828	0	0	0	0	0	0.658	0	0.419	0.793
BCL10	MAPK8	9606.ENSP00000359612	9606.ENSP00000378974	0	0	0	0	0	0.182	0.8	0.261	0.868
BIN1	SRSF1	9606.ENSP00000316779	9606.ENSP00000258962	0	0	0	0	0	0.086	0	0.48	0.505
BIN1	BIN2	9606.ENSP00000316779	9606.ENSP00000267012	0	0	0	0.831	0	0.74	0.9	0.878	0.976
BIN1	DBN1	9606.ENSP00000316779	9606.ENSP00000292385	0	0	0	0	0.063	0.25	0	0.256	0.432
BIN1	LCP1	9606.ENSP00000316779	9606.ENSP00000381581	0	0	0	0	0.137	0.144	0	0.285	0.425
BIN1	SPTBN1	9606.ENSP00000316779	9606.ENSP00000349259	0	0	0	0	0.12	0.144	0	0.331	0.453
BIN1	FNBP1	9606.ENSP00000316779	9606.ENSP00000413625	0	0	0	0	0.062	0.095	0	0.47	0.51
BIN1	PACSIN1	9606.ENSP00000316779	9606.ENSP00000484060	0	0	0	0	0.086	0	0	0.49	0.514
BIN1	SH3KBP1	9606.ENSP00000316779	9606.ENSP00000380921	0	0	0	0	0	0	0	0.536	0.536
BIN1	MEF2C	9606.ENSP00000316779	9606.ENSP00000340874	0	0	0	0	0.077	0	0	0.52	0.538
BIN1	APOBR	9606.ENSP00000316779	9606.ENSP00000457539	0	0	0	0	0	0	0.54	0	0.54
BIN1	DBNL	9606.ENSP00000316779	9606.ENSP00000417653	0	0	0	0	0.063	0.25	0	0.504	0.621
BIN1	CD2AP	9606.ENSP00000316779	9606.ENSP00000352264	0	0	0	0	0	0	0	0.834	0.834
BIN1	MYC	9606.ENSP00000316779	9606.ENSP00000479618	0	0	0	0	0.066	0.962	0	0.988	0.999
BIN2	DOCK2	9606.ENSP00000267012	9606.ENSP00000256935	0	0	0	0	0.41	0	0	0.176	0.493
BIN2	DBN1	9606.ENSP00000267012	9606.ENSP00000292385	0	0	0	0	0.063	0.25	0	0.236	0.416
BIN2	DBNL	9606.ENSP00000267012	9606.ENSP00000417653	0	0	0	0	0.074	0.25	0	0.236	0.423
BIN2	SASH3	9606.ENSP00000267012	9606.ENSP00000349359	0	0	0	0	0.35	0	0	0.22	0.471
BIN2	LCP1	9606.ENSP00000267012	9606.ENSP00000381581	0	0	0	0	0.39	0.144	0	0.232	0.563
BIN2	PTPRC	9606.ENSP00000267012	9606.ENSP00000411355	0	0	0	0	0.571	0	0	0.047	0.574
BIN2	EVI2B	9606.ENSP00000267012	9606.ENSP00000333779	0	0	0	0	0.55	0	0	0.167	0.609
BIN2	ETV6	9606.ENSP00000267012	9606.ENSP00000379658	0	0	0	0	0.063	0	0.6	0.048	0.612
BIN2	FYB	9606.ENSP00000267012	9606.ENSP00000427114	0	0	0	0	0.568	0	0	0.337	0.701
BIN2	BIN1	9606.ENSP00000267012	9606.ENSP00000316779	0	0	0	0.831	0	0.74	0.9	0.878	0.976
BMP2K	DBN1	9606.ENSP00000334836	9606.ENSP00000292385	0	0	0	0	0.066	0.421	0	0.208	0.534
BMP2K	CLINT1	9606.ENSP00000334836	9606.ENSP00000429824	0	0	0	0	0	0.607	0	0	0.607
BMP2K	DBNL	9606.ENSP00000334836	9606.ENSP00000417653	0	0	0	0	0.072	0.604	0	0.38	0.752
BMP2K	REPS1	9606.ENSP00000334836	9606.ENSP00000392065	0	0	0	0	0	0.749	0	0.656	0.91
BNIP2	MAPK14	9606.ENSP00000267859	9606.ENSP00000229795	0	0	0	0	0	0	0.6	0.245	0.685
BNIP2	SPAG9	9606.ENSP00000267859	9606.ENSP00000262013	0	0	0	0	0.062	0	0.6	0.544	0.814
BNIP2	BCL10	9606.ENSP00000267859	9606.ENSP00000359612	0	0	0	0	0	0	0	0.439	0.439
BNIP2	MEF2C	9606.ENSP00000267859	9606.ENSP00000340874	0	0	0	0	0	0	0.65	0.057	0.655
BNIP2	AKAP13	9606.ENSP00000267859	9606.ENSP00000354718	0	0	0	0	0	0	0	0.748	0.748
BNIP2	ARHGAP1	9606.ENSP00000267859	9606.ENSP00000310491	0	0	0	0.659	0	0.779	0	0.826	0.84
CANX	PGRMC1	9606.ENSP00000247461	9606.ENSP00000217971	0	0	0	0	0.076	0.33	0	0.122	0.409
CANX	MAPK3	9606.ENSP00000247461	9606.ENSP00000263025	0	0	0	0	0.091	0.08	0	0.346	0.406
CANX	PIAS1	9606.ENSP00000247461	9606.ENSP00000249636	0	0	0	0	0	0	0	0.406	0.407
CANX	HNRNPH1	9606.ENSP00000247461	9606.ENSP00000349168	0	0	0	0	0.084	0.27	0	0.205	0.421
CANX	ATP2B1	9606.ENSP00000247461	9606.ENSP00000392043	0	0	0	0	0.063	0.303	0	0.187	0.423
CANX	RTN4	9606.ENSP00000247461	9606.ENSP00000337838	0	0	0	0	0	0.094	0	0.43	0.462
CANX	AKT1	9606.ENSP00000247461	9606.ENSP00000451828	0	0	0	0	0	0.057	0	0.478	0.486
CANX	MYC	9606.ENSP00000247461	9606.ENSP00000479618	0	0	0	0	0	0	0	0.584	0.584
CANX	HSP90AB1	9606.ENSP00000247461	9606.ENSP00000360609	0	0	0	0	0.226	0.057	0	0.536	0.632
CANX	TMX1	9606.ENSP00000247461	9606.ENSP00000393316	0	0	0	0	0.218	0.429	0	0.553	0.784
CANX	HSP90AA1	9606.ENSP00000247461	9606.ENSP00000335153	0	0	0	0	0.215	0.284	0	0.735	0.838
CAST	PXN	9606.ENSP00000379157	9606.ENSP00000267257	0	0	0	0	0.062	0	0.9	0.213	0.919
CAST	SPTAN1	9606.ENSP00000379157	9606.ENSP00000361824	0	0	0	0	0	0	0	0.625	0.625
CAST	LSP1	9606.ENSP00000379157	9606.ENSP00000371194	0	0	0	0	0	0	0	0.539	0.539
CBX1	CBX5	9606.ENSP00000377060	9606.ENSP00000209875	0	0	0	0.96	0.13	0.75	0	0.892	0.781
CBX1	HIST1H1A	9606.ENSP00000377060	9606.ENSP00000244573	0	0	0	0	0	0.261	0	0.266	0.435
CBX1	TRIM28	9606.ENSP00000377060	9606.ENSP00000253024	0	0	0	0	0.062	0.898	0.9	0.864	0.998
CBX1	KPNA3	9606.ENSP00000377060	9606.ENSP00000261667	0	0	0	0	0.062	0.377	0	0.087	0.42
CBX1	PML	9606.ENSP00000377060	9606.ENSP00000268058	0	0	0	0	0.062	0.076	0.6	0.094	0.643
CBX1	POGZ	9606.ENSP00000377060	9606.ENSP00000271715	0	0	0	0	0.062	0.92	0	0.518	0.961
CBX1	NIPBL	9606.ENSP00000377060	9606.ENSP00000282516	0	0	0	0	0.062	0.222	0	0.291	0.437
CBX1	HIST1H1E	9606.ENSP00000377060	9606.ENSP00000307705	0	0	0	0	0.059	0.463	0	0.453	0.7
CBX1	CBX3	9606.ENSP00000377060	9606.ENSP00000336687	0	0	0	0.967	0.068	0.81	0	0.87	0.82
CBX1	HIST1H1C	9606.ENSP00000377060	9606.ENSP00000339566	0	0	0	0	0	0.185	0	0.311	0.414
CBX1	LBR	9606.ENSP00000377060	9606.ENSP00000339883	0	0	0	0	0.074	0.289	0	0.644	0.745
CBX1	HNRNPA1	9606.ENSP00000377060	9606.ENSP00000341826	0	0	0	0	0.174	0.183	0	0.205	0.417
CBX1	SP100	9606.ENSP00000377060	9606.ENSP00000343023	0	0	0	0	0.062	0.463	0	0.082	0.497
CBX1	CHD4	9606.ENSP00000377060	9606.ENSP00000349508	0	0	0	0	0.069	0.869	0	0.448	0.927
CBX1	DNMT1	9606.ENSP00000377060	9606.ENSP00000352516	0	0	0	0	0.062	0.428	0	0.512	0.715
CBX1	SERBP1	9606.ENSP00000377060	9606.ENSP00000360034	0	0	0	0	0.042	0.159	0	0.357	0.437
CBX1	HDAC1	9606.ENSP00000377060	9606.ENSP00000362649	0	0	0	0	0.076	0.216	0	0.656	0.73
CBX1	RBL1	9606.ENSP00000377060	9606.ENSP00000362768	0	0	0	0	0.054	0.243	0	0.275	0.435
CBX1	TP53BP1	9606.ENSP00000377060	9606.ENSP00000371475	0	0	0	0	0.062	0	0	0.587	0.596
CBX1	ATF7IP	9606.ENSP00000377060	9606.ENSP00000440440	0	0	0	0	0	0	0	0.545	0.545
CBX1	HDAC2	9606.ENSP00000377060	9606.ENSP00000430432	0	0	0	0	0.155	0.287	0	0.503	0.676
CBX1	MECP2	9606.ENSP00000377060	9606.ENSP00000395535	0	0	0	0	0.062	0.27	0	0.677	0.759
CBX1	NUMA1	9606.ENSP00000377060	9606.ENSP00000377298	0	0	0	0	0.055	0	0	0.889	0.891
CBX1	HIST1H3A	9606.ENSP00000377060	9606.ENSP00000480826	0	0	0	0	0.053	0.967	0	0.207	0.974
CBX3	CBX5	9606.ENSP00000336687	9606.ENSP00000209875	0	0	0	0.958	0.085	0.87	0	0.914	0.88
CBX3	TRIM28	9606.ENSP00000336687	9606.ENSP00000253024	0	0	0	0	0.106	0.884	0	0.679	0.964
CBX3	SRSF1	9606.ENSP00000336687	9606.ENSP00000258962	0	0	0	0	0.344	0	0	0.71	0.802
CBX3	EP300	9606.ENSP00000336687	9606.ENSP00000263253	0	0	0	0	0.064	0.184	0	0.372	0.479
CBX3	POGZ	9606.ENSP00000336687	9606.ENSP00000271715	0	0	0	0	0.075	0.782	0	0.177	0.82
CBX3	NIPBL	9606.ENSP00000336687	9606.ENSP00000282516	0	0	0	0	0.067	0.736	0	0.631	0.901
CBX3	HNRNPU	9606.ENSP00000336687	9606.ENSP00000283179	0	0	0	0	0.19	0	0	0.43	0.519
CBX3	NPM1	9606.ENSP00000336687	9606.ENSP00000296930	0	0	0	0	0.235	0.27	0	0.448	0.665
CBX3	HIST1H1E	9606.ENSP00000336687	9606.ENSP00000307705	0	0	0	0	0.053	0.971	0	0.322	0.98
CBX3	HIST1H1B	9606.ENSP00000336687	9606.ENSP00000330074	0	0	0	0	0	0.158	0	0.561	0.615
CBX3	IKZF1	9606.ENSP00000336687	9606.ENSP00000331614	0	0	0	0	0	0.078	0	0.436	0.458
CBX3	HNRNPA3	9606.ENSP00000336687	9606.ENSP00000376309	0	0	0	0	0.193	0.13	0	0.227	0.411
CBX3	HNRNPK	9606.ENSP00000336687	9606.ENSP00000365439	0	0	0	0	0.307	0	0	0.203	0.424
CBX3	MYC	9606.ENSP00000336687	9606.ENSP00000479618	0	0	0	0	0.068	0.128	0	0.359	0.433
CBX3	TP53BP1	9606.ENSP00000336687	9606.ENSP00000371475	0	0	0	0	0.062	0	0	0.455	0.466
CBX3	SMC3	9606.ENSP00000336687	9606.ENSP00000354720	0	0	0	0	0.158	0.146	0	0.33	0.477
CBX3	HMGN3	9606.ENSP00000336687	9606.ENSP00000482613	0	0	0	0	0.062	0	0	0.495	0.506
CBX3	HNRNPA1	9606.ENSP00000336687	9606.ENSP00000341826	0	0	0	0	0.361	0.13	0	0.222	0.53
CBX3	MECP2	9606.ENSP00000336687	9606.ENSP00000395535	0	0	0	0	0.062	0.27	0	0.378	0.536
CBX3	DNMT1	9606.ENSP00000336687	9606.ENSP00000352516	0	0	0	0	0.068	0.249	0	0.538	0.648
CBX3	POLR2A	9606.ENSP00000336687	9606.ENSP00000480158	0	0	0	0	0.069	0.594	0	0.195	0.67
CBX3	SP100	9606.ENSP00000336687	9606.ENSP00000343023	0	0	0	0	0.062	0.626	0	0.146	0.674
CBX3	LBR	9606.ENSP00000336687	9606.ENSP00000339883	0	0	0	0	0.13	0.289	0	0.627	0.75
CBX3	CBX1	9606.ENSP00000336687	9606.ENSP00000377060	0	0	0	0.967	0.068	0.81	0	0.87	0.82
CBX3	HDAC2	9606.ENSP00000336687	9606.ENSP00000430432	0	0	0	0	0.149	0.287	0.65	0.447	0.867
CBX3	HDAC1	9606.ENSP00000336687	9606.ENSP00000362649	0	0	0	0	0.146	0.216	0.65	0.595	0.892
CBX3	CHD4	9606.ENSP00000336687	9606.ENSP00000349508	0	0	0	0	0.196	0.724	0.65	0.478	0.954
CBX3	HIST1H3A	9606.ENSP00000336687	9606.ENSP00000480826	0	0	0	0	0.048	0.967	0	0.147	0.971
CBX5	EP300	9606.ENSP00000209875	9606.ENSP00000263253	0	0	0	0	0.064	0.184	0	0.309	0.426
CBX5	HIST1H1C	9606.ENSP00000209875	9606.ENSP00000339566	0	0	0	0	0	0.158	0	0.387	0.461
CBX5	DEK	9606.ENSP00000209875	9606.ENSP00000380414	0	0	0	0	0.064	0	0	0.463	0.476
CBX5	HIST1H1D	9606.ENSP00000209875	9606.ENSP00000244534	0	0	0	0	0	0.158	0	0.451	0.518
CBX5	TP53BP1	9606.ENSP00000209875	9606.ENSP00000371475	0	0	0	0	0.085	0	0	0.536	0.558
CBX5	HIST1H1B	9606.ENSP00000209875	9606.ENSP00000330074	0	0	0	0	0.062	0.395	0	0.338	0.592
CBX5	KPNA3	9606.ENSP00000209875	9606.ENSP00000261667	0	0	0	0	0.062	0.561	0	0.141	0.616
CBX5	HDAC2	9606.ENSP00000209875	9606.ENSP00000430432	0	0	0	0	0.268	0.287	0	0.399	0.659
CBX5	HIST1H1E	9606.ENSP00000209875	9606.ENSP00000307705	0	0	0	0	0	0.359	0	0.579	0.719
CBX5	MECP2	9606.ENSP00000209875	9606.ENSP00000395535	0	0	0	0	0.062	0.486	0	0.471	0.722
CBX5	NIPBL	9606.ENSP00000209875	9606.ENSP00000282516	0	0	0	0	0.062	0.583	0	0.451	0.766
CBX5	HDAC1	9606.ENSP00000209875	9606.ENSP00000362649	0	0	0	0	0.246	0.216	0	0.642	0.77
CBX5	CBX1	9606.ENSP00000209875	9606.ENSP00000377060	0	0	0	0.96	0.13	0.75	0	0.892	0.781
CBX5	CHD4	9606.ENSP00000209875	9606.ENSP00000349508	0	0	0	0	0.079	0.687	0	0.344	0.794
CBX5	DNMT1	9606.ENSP00000209875	9606.ENSP00000352516	0	0	0	0	0.085	0.597	0	0.519	0.807
CBX5	CBX3	9606.ENSP00000209875	9606.ENSP00000336687	0	0	0	0.958	0.085	0.87	0	0.914	0.88
CBX5	SP100	9606.ENSP00000209875	9606.ENSP00000343023	0	0	0	0	0.062	0.877	0	0.232	0.904
CBX5	POGZ	9606.ENSP00000209875	9606.ENSP00000271715	0	0	0	0	0	0.799	0	0.607	0.917
CBX5	LBR	9606.ENSP00000209875	9606.ENSP00000339883	0	0	0	0	0.064	0.345	0	0.888	0.926
CBX5	HIST1H3A	9606.ENSP00000209875	9606.ENSP00000480826	0	0	0	0	0.048	0.955	0	0.322	0.968
CBX5	TRIM28	9606.ENSP00000209875	9606.ENSP00000253024	0	0	0	0	0.086	0.91	0	0.889	0.99
CCNK	CDK13	9606.ENSP00000374529	9606.ENSP00000181839	0	0	0	0	0.103	0.987	0.8	0.99	0.999
CCNK	IWS1	9606.ENSP00000374529	9606.ENSP00000295321	0	0	0	0	0.19	0	0.6	0.217	0.724
CCNK	NELFE	9606.ENSP00000374529	9606.ENSP00000364578	0	0	0	0	0.085	0	0.6	0.441	0.777
CCNK	HTATSF1	9606.ENSP00000374529	9606.ENSP00000442699	0	0	0	0	0.069	0	0	0.491	0.506
CCNK	CDK11B	9606.ENSP00000374529	9606.ENSP00000464036	0	0	0	0	0.344	0.213	0	0.225	0.565
CCNK	POU2F2	9606.ENSP00000374529	9606.ENSP00000431603	0	0	0	0	0	0	0.6	0	0.6
CCNK	POLR2A	9606.ENSP00000374529	9606.ENSP00000480158	0	0	0	0	0.21	0.742	0.6	0.741	0.976
CD2AP	MYH9	9606.ENSP00000352264	9606.ENSP00000216181	0	0	0	0	0.092	0.058	0	0.462	0.499
CD2AP	PDLIM2	9606.ENSP00000352264	9606.ENSP00000312634	0	0	0	0	0	0	0.54	0	0.54
CD2AP	BIN1	9606.ENSP00000352264	9606.ENSP00000316779	0	0	0	0	0	0	0	0.834	0.834
CD2AP	ZYX	9606.ENSP00000352264	9606.ENSP00000324422	0	0	0	0	0	0.492	0	0.228	0.591
CD2AP	MEF2C	9606.ENSP00000352264	9606.ENSP00000340874	0	0	0	0	0.053	0	0	0.505	0.511
CD2AP	AKT1	9606.ENSP00000352264	9606.ENSP00000451828	0	0	0	0	0	0.282	0	0.292	0.47
CD2AP	SH3KBP1	9606.ENSP00000352264	9606.ENSP00000380921	0	0	0	0.849	0	0.878	0	0.873	0.893
CDK11B	PSMA3	9606.ENSP00000464036	9606.ENSP00000216455	0	0	0	0	0.062	0	0	0.414	0.427
CDK11B	RBM25	9606.ENSP00000464036	9606.ENSP00000261973	0	0	0	0	0.255	0.271	0	0	0.433
CDK11B	HSP90AA1	9606.ENSP00000464036	9606.ENSP00000335153	0	0	0	0	0.049	0.394	0	0.112	0.443
CDK11B	CCNK	9606.ENSP00000464036	9606.ENSP00000374529	0	0	0	0	0.344	0.213	0	0.225	0.565
CDK11B	SRSF2	9606.ENSP00000464036	9606.ENSP00000376276	0	0	0	0	0.308	0	0	0.487	0.629
CDK13	MAPK14	9606.ENSP00000181839	9606.ENSP00000229795	0	0	0	0.756	0.062	0.376	0	0.136	0.405
CDK13	RBL1	9606.ENSP00000181839	9606.ENSP00000362768	0	0	0	0	0	0.389	0	0.077	0.412
CDK13	NIPBL	9606.ENSP00000181839	9606.ENSP00000282516	0	0	0	0	0.423	0	0	0.06	0.435
CDK13	ANP32B	9606.ENSP00000181839	9606.ENSP00000345848	0	0	0	0	0.046	0	0	0.433	0.435
CDK13	CHD4	9606.ENSP00000181839	9606.ENSP00000349508	0	0	0	0	0.099	0.137	0	0.339	0.441
CDK13	NELFE	9606.ENSP00000181839	9606.ENSP00000364578	0	0	0	0	0.073	0	0	0.437	0.456
CDK13	SRSF1	9606.ENSP00000181839	9606.ENSP00000258962	0	0	0	0	0.069	0.221	0	0.311	0.457
CDK13	SCAF8	9606.ENSP00000181839	9606.ENSP00000413098	0	0	0	0	0.124	0.101	0	0.377	0.467
CDK13	CSTF2	9606.ENSP00000181839	9606.ENSP00000362063	0	0	0	0	0.096	0.221	0	0.307	0.469
CDK13	POLR2A	9606.ENSP00000181839	9606.ENSP00000480158	0	0	0	0	0.1	0.757	0	0.645	0.915
CDK13	CCNK	9606.ENSP00000181839	9606.ENSP00000374529	0	0	0	0	0.103	0.987	0.8	0.99	0.999
CDK5RAP2	PRKAR2B	9606.ENSP00000343818	9606.ENSP00000265717	0	0	0	0	0.064	0.597	0	0.074	0.62
CDK5RAP2	NIPBL	9606.ENSP00000343818	9606.ENSP00000282516	0	0	0	0	0.063	0	0	0.396	0.41
CDK5RAP2	MACF1	9606.ENSP00000343818	9606.ENSP00000354573	0	0	0	0	0.064	0	0	0.422	0.435
CDK5RAP2	CEP350	9606.ENSP00000343818	9606.ENSP00000356579	0	0	0	0	0	0.058	0	0.555	0.563
CDK5RAP2	CNTROB	9606.ENSP00000343818	9606.ENSP00000369614	0	0	0	0	0.063	0	0	0.558	0.568
CDK5RAP2	PCNT	9606.ENSP00000343818	9606.ENSP00000352572	0	0	0	0	0.152	0.919	0	0.99	0.999
CEP350	CDK5RAP2	9606.ENSP00000356579	9606.ENSP00000343818	0	0	0	0	0	0.058	0	0.555	0.563
CEP350	PCNT	9606.ENSP00000356579	9606.ENSP00000352572	0	0	0	0	0.064	0	0	0.566	0.577
CEP350	FGFR1OP	9606.ENSP00000356579	9606.ENSP00000355812	0	0	0	0	0	0.897	0	0.828	0.981
CEP350	CNTROB	9606.ENSP00000356579	9606.ENSP00000369614	0	0	0	0	0	0	0	0.452	0.452
CFL1	VCL	9606.ENSP00000432660	9606.ENSP00000211998	0	0	0	0	0.049	0	0	0.661	0.664
CFL1	MYH9	9606.ENSP00000432660	9606.ENSP00000216181	0	0	0	0	0.091	0.195	0	0.416	0.536
CFL1	VASP	9606.ENSP00000432660	9606.ENSP00000245932	0	0	0	0	0.088	0	0	0.702	0.717
CFL1	HSPB1	9606.ENSP00000432660	9606.ENSP00000248553	0	0	0	0	0.09	0	0	0.469	0.496
CFL1	MAPK3	9606.ENSP00000432660	9606.ENSP00000263025	0	0	0	0	0.09	0	0	0.469	0.496
CFL1	SLC9A1	9606.ENSP00000432660	9606.ENSP00000263980	0	0	0	0	0.062	0	0	0.39	0.403
CFL1	PXN	9606.ENSP00000432660	9606.ENSP00000267257	0	0	0	0	0.089	0.065	0	0.677	0.701
CFL1	DBN1	9606.ENSP00000432660	9606.ENSP00000292385	0	0	0	0	0.067	0.25	0	0.697	0.769
CFL1	ZYX	9606.ENSP00000432660	9606.ENSP00000324422	0	0	0	0	0.156	0	0	0.414	0.485
CFL1	FMNL1	9606.ENSP00000432660	9606.ENSP00000329219	0	0	0	0	0.063	0.077	0	0.369	0.406
CFL1	HSP90AA1	9606.ENSP00000432660	9606.ENSP00000335153	0	0	0	0	0.106	0	0	0.54	0.573
CFL1	RTN4	9606.ENSP00000432660	9606.ENSP00000337838	0	0	0	0	0	0.283	0	0.401	0.552
CFL1	FN1	9606.ENSP00000432660	9606.ENSP00000346839	0	0	0	0	0.051	0.063	0	0.522	0.538
CFL1	TAGLN2	9606.ENSP00000432660	9606.ENSP00000357076	0	0	0	0	0.156	0.429	0	0.436	0.705
CFL1	FLNA	9606.ENSP00000432660	9606.ENSP00000358866	0	0	0	0	0.108	0.319	0	0.599	0.735
CFL1	LCP1	9606.ENSP00000432660	9606.ENSP00000381581	0	0	0	0	0.064	0.162	0	0.636	0.69
CFL1	PPP1R12A	9606.ENSP00000432660	9606.ENSP00000389168	0	0	0	0	0.062	0.089	0	0.556	0.587
CFL1	DBNL	9606.ENSP00000432660	9606.ENSP00000417653	0	0	0	0	0.125	0.373	0	0.528	0.719
CFL1	MYC	9606.ENSP00000432660	9606.ENSP00000479618	0	0	0	0	0.068	0.122	0	0.37	0.439
CFL1	MYO18A	9606.ENSP00000432660	9606.ENSP00000437073	0	0	0	0	0.063	0.338	0	0.247	0.493
CFL1	PPP1R9B	9606.ENSP00000432660	9606.ENSP00000478767	0	0	0	0	0.069	0.103	0	0.536	0.579
CFL1	AKT1	9606.ENSP00000432660	9606.ENSP00000451828	0	0	0	0	0.12	0.079	0	0.666	0.706
CHD4	CDK13	9606.ENSP00000349508	9606.ENSP00000181839	0	0	0	0	0.099	0.137	0	0.339	0.441
CHD4	CBX5	9606.ENSP00000349508	9606.ENSP00000209875	0	0	0	0	0.079	0.687	0	0.344	0.794
CHD4	TRIM28	9606.ENSP00000349508	9606.ENSP00000253024	0	0	0	0	0.33	0.494	0	0.335	0.755
CHD4	SMARCC1	9606.ENSP00000349508	9606.ENSP00000254480	0	0	0	0	0.411	0.872	0	0.497	0.959
CHD4	SRSF1	9606.ENSP00000349508	9606.ENSP00000258962	0	0	0	0	0.288	0.286	0	0.24	0.58
CHD4	RBM25	9606.ENSP00000349508	9606.ENSP00000261973	0	0	0	0	0.24	0.36	0	0	0.493
CHD4	EP300	9606.ENSP00000349508	9606.ENSP00000263253	0	0	0	0	0.064	0.65	0.9	0.642	0.986
CHD4	DIDO1	9606.ENSP00000349508	9606.ENSP00000266070	0	0	0	0	0.194	0.185	0	0.181	0.416
CHD4	SMARCC2	9606.ENSP00000349508	9606.ENSP00000267064	0	0	0	0	0.233	0.423	0	0.434	0.728
CHD4	PML	9606.ENSP00000349508	9606.ENSP00000268058	0	0	0	0	0	0.282	0.9	0.076	0.927
CHD4	NIPBL	9606.ENSP00000349508	9606.ENSP00000282516	0	0	0	0	0.115	0.153	0	0.353	0.473
CHD4	HNRNPU	9606.ENSP00000349508	9606.ENSP00000283179	0	0	0	0	0.305	0.281	0	0.138	0.532
CHD4	IWS1	9606.ENSP00000349508	9606.ENSP00000295321	0	0	0	0	0.125	0.388	0	0.059	0.453
CHD4	NPM1	9606.ENSP00000349508	9606.ENSP00000296930	0	0	0	0	0.106	0.319	0	0.163	0.446
CHD4	SRRM2	9606.ENSP00000349508	9606.ENSP00000301740	0	0	0	0	0.188	0.328	0	0.201	0.526
CHD4	HNRNPUL2	9606.ENSP00000349508	9606.ENSP00000301785	0	0	0	0	0.099	0.281	0	0.245	0.469
CHD4	SRRM1	9606.ENSP00000349508	9606.ENSP00000326261	0	0	0	0	0.18	0.293	0	0.049	0.401
CHD4	IKZF1	9606.ENSP00000349508	9606.ENSP00000331614	0	0	0	0	0	0.87	0	0.969	0.995
CHD4	CBX3	9606.ENSP00000349508	9606.ENSP00000336687	0	0	0	0	0.196	0.724	0.65	0.478	0.954
CHD4	HNRNPA1	9606.ENSP00000349508	9606.ENSP00000341826	0	0	0	0	0.292	0.321	0	0.088	0.523
CHD4	IKZF3	9606.ENSP00000349508	9606.ENSP00000344544	0	0	0	0	0	0.52	0	0.663	0.831
CHD4	THRAP3	9606.ENSP00000349508	9606.ENSP00000346634	0	0	0	0	0.141	0.27	0	0.255	0.492
CHD4	ATN1	9606.ENSP00000349508	9606.ENSP00000349076	0	0	0	0	0.064	0	0.65	0.142	0.694
CHD4	HNRNPH1	9606.ENSP00000349508	9606.ENSP00000349168	0	0	0	0	0.288	0.27	0	0	0.458
CHD4	MECP2	9606.ENSP00000349508	9606.ENSP00000395535	0	0	0	0	0.049	0.152	0	0.319	0.402
CHD4	POLR2A	9606.ENSP00000349508	9606.ENSP00000480158	0	0	0	0	0.154	0.235	0	0.188	0.429
CHD4	PRPF40A	9606.ENSP00000349508	9606.ENSP00000386458	0	0	0	0	0.204	0.284	0	0.091	0.437
CHD4	SCAF8	9606.ENSP00000349508	9606.ENSP00000413098	0	0	0	0	0.344	0.179	0	0	0.438
CHD4	DEK	9606.ENSP00000349508	9606.ENSP00000380414	0	0	0	0	0.219	0.285	0	0.113	0.463
CHD4	MCM3	9606.ENSP00000349508	9606.ENSP00000480987	0	0	0	0	0.22	0.352	0	0.056	0.481
CHD4	MYC	9606.ENSP00000349508	9606.ENSP00000479618	0	0	0	0	0	0.273	0	0.322	0.486
CHD4	HNRNPK	9606.ENSP00000349508	9606.ENSP00000365439	0	0	0	0	0.3	0.27	0	0.087	0.493
CHD4	NUMA1	9606.ENSP00000349508	9606.ENSP00000377298	0	0	0	0	0.136	0.282	0	0.251	0.495
CHD4	XRN2	9606.ENSP00000349508	9606.ENSP00000366396	0	0	0	0	0.263	0.282	0	0.139	0.505
CHD4	TP53BP1	9606.ENSP00000349508	9606.ENSP00000371475	0	0	0	0	0.088	0.15	0	0.447	0.534
CHD4	SMC3	9606.ENSP00000349508	9606.ENSP00000354720	0.046	0	0	0	0.176	0.322	0	0.308	0.583
CHD4	DNMT1	9606.ENSP00000349508	9606.ENSP00000352516	0.053	0	0	0	0.116	0.486	0	0.448	0.731
CHD4	CBX1	9606.ENSP00000349508	9606.ENSP00000377060	0	0	0	0	0.069	0.869	0	0.448	0.927
CHD4	HIST1H3A	9606.ENSP00000349508	9606.ENSP00000480826	0	0	0	0	0	0.963	0	0.157	0.968
CHD4	HDAC2	9606.ENSP00000349508	9606.ENSP00000430432	0	0	0	0	0.187	0.936	0.9	0.972	0.999
CHD4	HDAC1	9606.ENSP00000349508	9606.ENSP00000362649	0	0	0	0	0.443	0.943	0.9	0.99	0.999
CIC	MAPK3	9606.ENSP00000458663	9606.ENSP00000263025	0	0	0	0	0.066	0.316	0	0.139	0.401
CIC	ATN1	9606.ENSP00000458663	9606.ENSP00000349076	0	0	0	0	0.311	0	0	0.328	0.517
CLINT1	ARHGAP1	9606.ENSP00000429824	9606.ENSP00000310491	0	0	0	0	0	0	0	0.442	0.442
CLINT1	BMP2K	9606.ENSP00000429824	9606.ENSP00000334836	0	0	0	0	0	0.607	0	0	0.607
CLINT1	REPS1	9606.ENSP00000429824	9606.ENSP00000392065	0	0	0	0	0.049	0.477	0.54	0.047	0.752
CMTR1	DNAJC13	9606.ENSP00000362550	9606.ENSP00000260818	0	0	0	0	0	0	0	0.5	0.5
CMTR1	FAM103A1	9606.ENSP00000362550	9606.ENSP00000307181	0	0	0	0	0	0	0	0.66	0.66
CNTROB	CDK5RAP2	9606.ENSP00000369614	9606.ENSP00000343818	0	0	0	0	0.063	0	0	0.558	0.568
CNTROB	PCNT	9606.ENSP00000369614	9606.ENSP00000352572	0	0	0	0	0.062	0	0	0.649	0.656
CNTROB	CEP350	9606.ENSP00000369614	9606.ENSP00000356579	0	0	0	0	0	0	0	0.452	0.452
COBLL1	PACSIN1	9606.ENSP00000341360	9606.ENSP00000484060	0	0	0	0	0	0.68	0	0.367	0.789
CRTC2	PRKAB1	9606.ENSP00000357622	9606.ENSP00000229328	0	0	0	0	0	0	0.8	0.211	0.835
CRTC2	EP300	9606.ENSP00000357622	9606.ENSP00000263253	0	0	0	0	0.054	0.27	0.8	0.565	0.932
CRTC2	MAP1B	9606.ENSP00000357622	9606.ENSP00000296755	0	0	0	0	0	0	0	0.509	0.509
CRTC2	SRSF2	9606.ENSP00000357622	9606.ENSP00000376276	0	0	0	0	0	0	0	0.452	0.452
CRTC2	FOXO1	9606.ENSP00000357622	9606.ENSP00000368880	0	0	0	0	0	0	0	0.648	0.648
CRTC2	AKT1	9606.ENSP00000357622	9606.ENSP00000451828	0	0	0	0	0.069	0.058	0.8	0.424	0.885
CSTF2	CDK13	9606.ENSP00000362063	9606.ENSP00000181839	0	0	0	0	0.096	0.221	0	0.307	0.469
CSTF2	ZC3H14	9606.ENSP00000362063	9606.ENSP00000251038	0	0	0	0	0.104	0.14	0	0.399	0.497
CSTF2	ZC3H4	9606.ENSP00000362063	9606.ENSP00000253048	0	0	0	0	0.172	0.51	0	0.288	0.686
CSTF2	SRSF1	9606.ENSP00000362063	9606.ENSP00000258962	0	0	0	0	0.128	0	0.6	0.402	0.773
CSTF2	RBM25	9606.ENSP00000362063	9606.ENSP00000261973	0	0	0	0.55	0.325	0.653	0	0.178	0.771
CSTF2	DIDO1	9606.ENSP00000362063	9606.ENSP00000266070	0	0	0	0	0.102	0.131	0	0.296	0.403
CSTF2	SLU7	9606.ENSP00000362063	9606.ENSP00000297151	0	0	0	0	0.065	0.144	0.6	0.101	0.673
CSTF2	SRRM1	9606.ENSP00000362063	9606.ENSP00000326261	0	0	0	0	0.262	0.288	0.6	0.234	0.817
CSTF2	YTHDC1	9606.ENSP00000362063	9606.ENSP00000339245	0	0	0	0	0.119	0	0	0.451	0.496
CSTF2	HNRNPA1	9606.ENSP00000362063	9606.ENSP00000341826	0	0	0	0	0.123	0.182	0	0.41	0.539
CSTF2	HNRNPH1	9606.ENSP00000362063	9606.ENSP00000349168	0	0	0	0	0.111	0.077	0	0.571	0.618
CSTF2	DKC1	9606.ENSP00000362063	9606.ENSP00000358563	0	0	0	0	0.164	0.145	0	0.275	0.437
CSTF2	PRPF40A	9606.ENSP00000362063	9606.ENSP00000386458	0	0	0	0	0.29	0.24	0	0.101	0.473
CSTF2	HNRNPK	9606.ENSP00000362063	9606.ENSP00000365439	0	0	0	0	0.087	0.253	0	0.3	0.481
CSTF2	SCAF8	9606.ENSP00000362063	9606.ENSP00000413098	0	0	0	0	0.18	0.063	0.54	0.211	0.684
CSTF2	POLR2A	9606.ENSP00000362063	9606.ENSP00000480158	0	0	0	0	0.116	0.379	0	0.504	0.704
CSTF2	XRN2	9606.ENSP00000362063	9606.ENSP00000366396	0	0	0	0	0.153	0.14	0	0.633	0.709
CSTF2	SRSF2	9606.ENSP00000362063	9606.ENSP00000376276	0	0	0	0	0.318	0.255	0.6	0.369	0.854
DBN1	MYH9	9606.ENSP00000292385	9606.ENSP00000216181	0	0	0	0	0.062	0.221	0	0.268	0.418
DBN1	BIN2	9606.ENSP00000292385	9606.ENSP00000267012	0	0	0	0	0.063	0.25	0	0.236	0.416
DBN1	TAGLN2	9606.ENSP00000292385	9606.ENSP00000357076	0	0	0	0	0	0.244	0	0.259	0.416
DBN1	BIN1	9606.ENSP00000292385	9606.ENSP00000316779	0	0	0	0	0.063	0.25	0	0.256	0.432
DBN1	MARCKS	9606.ENSP00000292385	9606.ENSP00000478061	0	0	0	0	0.062	0.271	0	0.26	0.449
DBN1	SPTAN1	9606.ENSP00000292385	9606.ENSP00000361824	0	0	0	0	0.062	0.401	0	0.124	0.465
DBN1	RAD9A	9606.ENSP00000292385	9606.ENSP00000311360	0	0	0	0	0	0	0	0.472	0.472
DBN1	AAK1	9606.ENSP00000292385	9606.ENSP00000386456	0	0	0	0	0.066	0.363	0	0.208	0.487
DBN1	BMP2K	9606.ENSP00000292385	9606.ENSP00000334836	0	0	0	0	0.066	0.421	0	0.208	0.534
DBN1	LCP1	9606.ENSP00000292385	9606.ENSP00000381581	0	0	0	0	0.085	0.368	0	0.326	0.576
DBN1	LRRFIP1	9606.ENSP00000292385	9606.ENSP00000375857	0	0	0	0	0	0.131	0	0.553	0.595
DBN1	MAP4K1	9606.ENSP00000292385	9606.ENSP00000465039	0	0	0	0	0	0	0	0.627	0.627
DBN1	FLNA	9606.ENSP00000292385	9606.ENSP00000358866	0	0	0	0	0.064	0.561	0	0.352	0.711
DBN1	SPTBN1	9606.ENSP00000292385	9606.ENSP00000349259	0	0	0	0	0.062	0.725	0	0.128	0.755
DBN1	CFL1	9606.ENSP00000292385	9606.ENSP00000432660	0	0	0	0	0.067	0.25	0	0.697	0.769
DBN1	PPP1R9B	9606.ENSP00000292385	9606.ENSP00000478767	0	0	0	0	0.062	0.427	0	0.642	0.791
DBNL	VASP	9606.ENSP00000417653	9606.ENSP00000245932	0	0	0	0	0.137	0	0	0.34	0.407
DBNL	BIN2	9606.ENSP00000417653	9606.ENSP00000267012	0	0	0	0	0.074	0.25	0	0.236	0.423
DBNL	BIN1	9606.ENSP00000417653	9606.ENSP00000316779	0	0	0	0	0.063	0.25	0	0.504	0.621
DBNL	BMP2K	9606.ENSP00000417653	9606.ENSP00000334836	0	0	0	0	0.072	0.604	0	0.38	0.752
DBNL	FILIP1L	9606.ENSP00000417653	9606.ENSP00000346560	0	0	0	0	0	0	0	0.511	0.511
DBNL	LCP1	9606.ENSP00000417653	9606.ENSP00000381581	0	0	0	0	0.085	0.567	0	0.439	0.758
DBNL	AAK1	9606.ENSP00000417653	9606.ENSP00000386456	0	0	0	0	0.072	0.604	0	0.38	0.752
DBNL	AGFG1	9606.ENSP00000417653	9606.ENSP00000387282	0	0	0	0	0	0.484	0	0	0.484
DBNL	FNBP1	9606.ENSP00000417653	9606.ENSP00000413625	0	0	0	0	0	0	0	0.488	0.488
DBNL	FYB	9606.ENSP00000417653	9606.ENSP00000427114	0	0	0	0	0.057	0.182	0	0.584	0.651
DBNL	CFL1	9606.ENSP00000417653	9606.ENSP00000432660	0	0	0	0	0.125	0.373	0	0.528	0.719
DBNL	MAP4K1	9606.ENSP00000417653	9606.ENSP00000465039	0	0	0	0	0	0.27	0.9	0.925	0.994
DCAF5	SRRM2	9606.ENSP00000341351	9606.ENSP00000301740	0	0	0	0	0.062	0	0	0.687	0.694
DCAF5	AP3D1	9606.ENSP00000341351	9606.ENSP00000347416	0	0	0	0	0	0	0	0.666	0.666
DEK	CBX5	9606.ENSP00000380414	9606.ENSP00000209875	0	0	0	0	0.064	0	0	0.463	0.476
DEK	EP300	9606.ENSP00000380414	9606.ENSP00000263253	0	0	0	0	0.062	0.27	0.6	0.303	0.783
DEK	TMPO	9606.ENSP00000380414	9606.ENSP00000266732	0	0	0	0	0.401	0	0	0.183	0.489
DEK	NPM1	9606.ENSP00000380414	9606.ENSP00000296930	0	0	0	0	0.214	0.057	0	0.557	0.643
DEK	PDS5B	9606.ENSP00000380414	9606.ENSP00000313851	0	0	0	0	0.353	0.172	0	0	0.441
DEK	SRRM1	9606.ENSP00000380414	9606.ENSP00000326261	0	0	0	0	0.184	0.27	0	0.886	0.926
DEK	CHD4	9606.ENSP00000380414	9606.ENSP00000349508	0	0	0	0	0.219	0.285	0	0.113	0.463
DEK	SMC3	9606.ENSP00000380414	9606.ENSP00000354720	0	0	0	0	0.556	0	0	0.109	0.587
DEK	SERBP1	9606.ENSP00000380414	9606.ENSP00000360034	0	0	0	0	0.355	0	0	0.181	0.449
DEK	NCOA3	9606.ENSP00000380414	9606.ENSP00000361066	0	0	0	0	0.049	0	0	0.431	0.436
DEK	SET	9606.ENSP00000380414	9606.ENSP00000361777	0	0	0	0	0.294	0	0	0.433	0.583
DEK	SRSF2	9606.ENSP00000380414	9606.ENSP00000376276	0	0	0	0	0.247	0.27	0	0.283	0.571
DEK	MYH11	9606.ENSP00000380414	9606.ENSP00000379616	0	0	0	0	0	0.078	0	0.563	0.579
DEK	MYC	9606.ENSP00000380414	9606.ENSP00000479618	0	0	0	0	0	0.27	0	0.344	0.5
DEK	MECP2	9606.ENSP00000380414	9606.ENSP00000395535	0	0	0	0	0	0	0	0.595	0.595
DEK	PTGES3	9606.ENSP00000380414	9606.ENSP00000482075	0	0	0	0	0.653	0	0	0	0.653
DEK	ANP32A	9606.ENSP00000380414	9606.ENSP00000417864	0	0	0	0	0.17	0	0	0.608	0.66
DEK	HDAC2	9606.ENSP00000380414	9606.ENSP00000430432	0	0	0	0	0.582	0.27	0	0.457	0.82
DENND1B	ITSN1	9606.ENSP00000479816	9606.ENSP00000370719	0	0	0	0	0	0.24	0	0.396	0.522
DENND1B	AKT1	9606.ENSP00000479816	9606.ENSP00000451828	0	0	0	0	0	0	0.9	0	0.9
DENND1C	SNX17	9606.ENSP00000370889	9606.ENSP00000233575	0	0	0	0	0	0	0	0.468	0.468
DENND1C	STK4	9606.ENSP00000370889	9606.ENSP00000361892	0	0	0	0	0.062	0	0	0.399	0.412
DENR	EIF5	9606.ENSP00000280557	9606.ENSP00000216554	0	0	0	0	0.145	0.369	0	0.516	0.716
DENR	RPS3	9606.ENSP00000280557	9606.ENSP00000278572	0.185	0	0	0	0.159	0.399	0	0.119	0.589
DENR	EIF4G2	9606.ENSP00000280557	9606.ENSP00000433664	0	0	0	0	0.064	0.16	0	0.331	0.428
DENR	UBXN1	9606.ENSP00000280557	9606.ENSP00000294119	0	0	0	0	0.126	0.218	0	0.457	0.596
DENR	EIF3B	9606.ENSP00000280557	9606.ENSP00000354125	0	0	0	0	0.106	0.369	0	0.386	0.623
DFFA	FKBP15	9606.ENSP00000366237	9606.ENSP00000238256	0	0	0	0	0	0	0	0.444	0.444
DIDO1	ZC3H4	9606.ENSP00000266070	9606.ENSP00000253048	0	0	0	0	0.198	0	0	0.622	0.683
DIDO1	SCAF8	9606.ENSP00000266070	9606.ENSP00000413098	0	0	0	0	0.201	0	0	0.279	0.4
DIDO1	CSTF2	9606.ENSP00000266070	9606.ENSP00000362063	0	0	0	0	0.102	0.131	0	0.296	0.403
DIDO1	SON	9606.ENSP00000266070	9606.ENSP00000348984	0	0	0	0	0.224	0.271	0	0	0.41
DIDO1	HCFC1	9606.ENSP00000266070	9606.ENSP00000309555	0	0	0	0	0.176	0.274	0	0.101	0.415
DIDO1	CHD4	9606.ENSP00000266070	9606.ENSP00000349508	0	0	0	0	0.194	0.185	0	0.181	0.416
DIDO1	DPF2	9606.ENSP00000266070	9606.ENSP00000436901	0	0	0	0	0.108	0	0	0.432	0.472
DIDO1	HDGFRP3	9606.ENSP00000266070	9606.ENSP00000299633	0	0	0	0	0.47	0	0	0.092	0.498
DIDO1	NIPBL	9606.ENSP00000266070	9606.ENSP00000282516	0	0	0	0	0.489	0	0	0.137	0.54
DIDO1	SMC3	9606.ENSP00000266070	9606.ENSP00000354720	0	0	0	0	0.091	0	0.6	0.067	0.631
DIDO1	POLR2A	9606.ENSP00000266070	9606.ENSP00000480158	0	0	0	0	0.215	0.722	0	0.287	0.83
DIDO1	HIST1H3A	9606.ENSP00000266070	9606.ENSP00000480826	0	0	0	0	0	0.874	0	0.141	0.887
DKC1	FKBP15	9606.ENSP00000358563	9606.ENSP00000238256	0	0	0	0	0.743	0.173	0	0	0.778
DKC1	MPHOSPH10	9606.ENSP00000358563	9606.ENSP00000244230	0	0	0	0	0.834	0.684	0.72	0.277	0.988
DKC1	NSUN2	9606.ENSP00000358563	9606.ENSP00000264670	0.071	0	0	0	0.831	0	0	0.389	0.896
DKC1	RPS3	9606.ENSP00000358563	9606.ENSP00000278572	0.185	0	0	0	0.257	0	0	0.241	0.501
DKC1	HNRNPU	9606.ENSP00000358563	9606.ENSP00000283179	0	0	0	0	0.184	0	0.72	0.048	0.763
DKC1	NPM1	9606.ENSP00000358563	9606.ENSP00000296930	0	0	0	0	0.298	0	0	0.304	0.491
DKC1	PA2G4	9606.ENSP00000358563	9606.ENSP00000302886	0	0	0	0	0.67	0.056	0	0.125	0.703
DKC1	RAD9A	9606.ENSP00000358563	9606.ENSP00000311360	0	0	0	0	0.062	0	0.9	0	0.902
DKC1	KRI1	9606.ENSP00000358563	9606.ENSP00000320917	0	0	0	0	0.786	0.369	0	0.323	0.9
DKC1	HSP90AA1	9606.ENSP00000358563	9606.ENSP00000335153	0	0	0	0	0.114	0.077	0.9	0.615	0.964
DKC1	HNRNPA1	9606.ENSP00000358563	9606.ENSP00000341826	0	0	0	0	0.231	0.092	0	0.284	0.457
DKC1	EIF3B	9606.ENSP00000358563	9606.ENSP00000354125	0	0	0	0	0.836	0.369	0	0.128	0.902
DKC1	POLR2A	9606.ENSP00000358563	9606.ENSP00000480158	0	0	0	0	0.192	0.145	0	0.225	0.418
DKC1	SERBP1	9606.ENSP00000358563	9606.ENSP00000360034	0	0	0	0	0.238	0.27	0	0	0.42
DKC1	CSTF2	9606.ENSP00000358563	9606.ENSP00000362063	0	0	0	0	0.164	0.145	0	0.275	0.437
DKC1	EIF4G2	9606.ENSP00000358563	9606.ENSP00000433664	0	0	0	0	0.133	0.169	0	0.311	0.461
DKC1	MYC	9606.ENSP00000358563	9606.ENSP00000479618	0	0	0	0	0.107	0.128	0	0.402	0.494
DKC1	RPLP0	9606.ENSP00000358563	9606.ENSP00000449328	0.059	0	0	0	0.42	0.254	0	0.179	0.621
DKC1	PWP1	9606.ENSP00000358563	9606.ENSP00000387365	0	0	0	0	0.861	0.255	0	0.066	0.894
DKC1	AKT1	9606.ENSP00000358563	9606.ENSP00000451828	0	0	0	0	0	0.089	0.9	0.148	0.915
DKC1	PTGES3	9606.ENSP00000358563	9606.ENSP00000482075	0	0	0	0	0.143	0.299	0.9	0.18	0.944
DNAJC13	FKBP15	9606.ENSP00000260818	9606.ENSP00000238256	0	0	0	0	0.184	0	0	0.321	0.422
DNAJC13	CMTR1	9606.ENSP00000260818	9606.ENSP00000362550	0	0	0	0	0	0	0	0.5	0.5
DNMT1	CBX5	9606.ENSP00000352516	9606.ENSP00000209875	0	0	0	0	0.085	0.597	0	0.519	0.807
DNMT1	STUB1	9606.ENSP00000352516	9606.ENSP00000219548	0	0	0	0	0	0	0	0.404	0.404
DNMT1	MSH6	9606.ENSP00000352516	9606.ENSP00000234420	0.071	0	0	0	0.275	0.182	0	0.29	0.557
DNMT1	HIST1H1D	9606.ENSP00000352516	9606.ENSP00000244534	0	0	0	0	0.062	0	0	0.66	0.667
DNMT1	TRIM28	9606.ENSP00000352516	9606.ENSP00000253024	0	0	0	0	0.142	0.682	0	0.844	0.953
DNMT1	SMARCC1	9606.ENSP00000352516	9606.ENSP00000254480	0	0	0	0	0.151	0	0	0.342	0.417
DNMT1	EP300	9606.ENSP00000352516	9606.ENSP00000263253	0	0	0	0	0.062	0	0	0.669	0.676
DNMT1	HNRNPU	9606.ENSP00000352516	9606.ENSP00000283179	0	0	0	0	0.127	0	0	0.413	0.466
DNMT1	NPM1	9606.ENSP00000352516	9606.ENSP00000296930	0	0	0	0	0.086	0	0	0.382	0.411
DNMT1	HIST1H1B	9606.ENSP00000352516	9606.ENSP00000330074	0	0	0	0	0.063	0	0	0.454	0.467
DNMT1	HSP90AA1	9606.ENSP00000352516	9606.ENSP00000335153	0.111	0	0	0	0.081	0	0	0.974	0.977
DNMT1	CBX3	9606.ENSP00000352516	9606.ENSP00000336687	0	0	0	0	0.068	0.249	0	0.538	0.648
DNMT1	HIST1H1C	9606.ENSP00000352516	9606.ENSP00000339566	0	0	0	0	0.056	0	0	0.644	0.65
DNMT1	LBR	9606.ENSP00000352516	9606.ENSP00000339883	0	0	0	0	0.088	0	0	0.397	0.426
DNMT1	USP7	9606.ENSP00000352516	9606.ENSP00000343535	0	0	0	0	0.063	0.977	0	0.988	0.999
DNMT1	CHD4	9606.ENSP00000352516	9606.ENSP00000349508	0.053	0	0	0	0.116	0.486	0	0.448	0.731
DNMT1	HIST1H3A	9606.ENSP00000352516	9606.ENSP00000480826	0	0	0	0	0.053	0.221	0	0.296	0.436
DNMT1	PRAM1	9606.ENSP00000352516	9606.ENSP00000408342	0	0	0	0	0	0	0	0.452	0.452
DNMT1	AKT1	9606.ENSP00000352516	9606.ENSP00000451828	0	0	0	0	0	0.27	0	0.559	0.664
DNMT1	CBX1	9606.ENSP00000352516	9606.ENSP00000377060	0	0	0	0	0.062	0.428	0	0.512	0.715
DNMT1	MCM3	9606.ENSP00000352516	9606.ENSP00000480987	0	0	0	0	0.706	0	0	0.134	0.734
DNMT1	MYC	9606.ENSP00000352516	9606.ENSP00000479618	0	0	0	0	0.085	0.128	0	0.734	0.77
DNMT1	RBL1	9606.ENSP00000352516	9606.ENSP00000362768	0	0	0	0	0.092	0.731	0	0.274	0.807
DNMT1	MECP2	9606.ENSP00000352516	9606.ENSP00000395535	0	0	0	0	0	0.317	0	0.989	0.993
DNMT1	HDAC2	9606.ENSP00000352516	9606.ENSP00000430432	0	0	0	0	0.062	0.846	0.8	0.992	0.999
DNMT1	HDAC1	9606.ENSP00000352516	9606.ENSP00000362649	0	0	0	0	0.188	0.903	0.9	0.993	0.999
DOCK2	ARHGEF6	9606.ENSP00000256935	9606.ENSP00000250617	0	0	0	0	0.152	0	0	0.397	0.467
DOCK2	DOK3	9606.ENSP00000256935	9606.ENSP00000349727	0	0	0	0	0.202	0	0	0.292	0.411
DOCK2	SASH3	9606.ENSP00000256935	9606.ENSP00000349359	0	0	0	0	0.445	0	0	0	0.445
DOCK2	BIN2	9606.ENSP00000256935	9606.ENSP00000267012	0	0	0	0	0.41	0	0	0.176	0.493
DOCK2	MAP4K1	9606.ENSP00000256935	9606.ENSP00000465039	0	0	0	0	0.157	0	0	0.442	0.51
DOCK2	DOCK8	9606.ENSP00000256935	9606.ENSP00000394888	0	0	0	0.539	0.346	0	0	0.675	0.545
DOCK2	EVI2B	9606.ENSP00000256935	9606.ENSP00000333779	0	0	0	0	0.563	0	0	0.124	0.601
DOCK2	LCP1	9606.ENSP00000256935	9606.ENSP00000381581	0	0	0	0	0.569	0.066	0	0.1	0.606
DOCK2	FYB	9606.ENSP00000256935	9606.ENSP00000427114	0	0	0	0	0.458	0.27	0	0.29	0.695
DOCK2	IKZF1	9606.ENSP00000256935	9606.ENSP00000331614	0	0	0	0	0.681	0	0	0.117	0.706
DOCK2	PTPRC	9606.ENSP00000256935	9606.ENSP00000411355	0	0	0	0	0.734	0	0	0.227	0.786
DOCK2	AKT1	9606.ENSP00000256935	9606.ENSP00000451828	0	0	0	0	0	0.057	0	0.918	0.92
DOCK8	VASP	9606.ENSP00000394888	9606.ENSP00000245932	0	0	0	0	0	0	0	0.451	0.451
DOCK8	DOCK2	9606.ENSP00000394888	9606.ENSP00000256935	0	0	0	0.539	0.346	0	0	0.675	0.545
DOCK8	LY9	9606.ENSP00000394888	9606.ENSP00000263285	0	0	0	0	0.553	0	0	0.048	0.556
DOCK8	IKZF1	9606.ENSP00000394888	9606.ENSP00000331614	0	0	0	0	0.532	0	0	0.15	0.585
DOCK8	STK4	9606.ENSP00000394888	9606.ENSP00000361892	0	0	0	0	0.101	0	0	0.55	0.579
DOCK8	MAP4K1	9606.ENSP00000394888	9606.ENSP00000465039	0	0	0	0	0.157	0	0	0.349	0.428
DOCK8	FYB	9606.ENSP00000394888	9606.ENSP00000427114	0	0	0	0	0.359	0	0	0.218	0.477
DOCK8	PTPRC	9606.ENSP00000394888	9606.ENSP00000411355	0	0	0	0	0.628	0	0	0.255	0.711
DOK3	DOCK2	9606.ENSP00000349727	9606.ENSP00000256935	0	0	0	0	0.202	0	0	0.292	0.411
DPF2	NFKB1	9606.ENSP00000436901	9606.ENSP00000226574	0	0	0	0	0.07	0.538	0	0	0.552
DPF2	SMARCC1	9606.ENSP00000436901	9606.ENSP00000254480	0	0	0	0	0.123	0.897	0.54	0.84	0.992
DPF2	DIDO1	9606.ENSP00000436901	9606.ENSP00000266070	0	0	0	0	0.108	0	0	0.432	0.472
DPF2	SMARCC2	9606.ENSP00000436901	9606.ENSP00000267064	0	0	0	0	0.123	0.972	0.54	0.721	0.996
DPF2	HDAC1	9606.ENSP00000436901	9606.ENSP00000362649	0	0	0	0	0.167	0	0	0.442	0.516
DPF2	THUMPD1	9606.ENSP00000436901	9606.ENSP00000370741	0	0	0	0	0.127	0	0	0.351	0.409
E4F1	ANP32A	9606.ENSP00000301727	9606.ENSP00000417864	0	0	0	0	0	0.336	0	0.48	0.64
E4F1	HDAC1	9606.ENSP00000301727	9606.ENSP00000362649	0	0	0	0	0	0.578	0	0.459	0.762
EDC3	EIF4G2	9606.ENSP00000320503	9606.ENSP00000433664	0	0	0	0	0.097	0	0	0.369	0.405
EDC3	EIF3B	9606.ENSP00000320503	9606.ENSP00000354125	0	0	0	0	0.104	0	0	0.435	0.472
EDC3	EIF4G3	9606.ENSP00000320503	9606.ENSP00000383274	0	0	0	0	0.049	0	0	0.546	0.55
EDC3	XRN2	9606.ENSP00000320503	9606.ENSP00000366396	0	0	0	0	0.09	0.197	0	0.562	0.652
EEF1D	ELF1	9606.ENSP00000410059	9606.ENSP00000239882	0	0	0	0	0.086	0	0	0.428	0.454
EEF1D	HSPB1	9606.ENSP00000410059	9606.ENSP00000248553	0	0	0	0	0.081	0.272	0	0.243	0.449
EEF1D	RPS3	9606.ENSP00000410059	9606.ENSP00000278572	0.153	0	0	0	0.816	0.758	0	0.169	0.964
EEF1D	NPM1	9606.ENSP00000410059	9606.ENSP00000296930	0	0	0	0	0.14	0.27	0	0.261	0.495
EEF1D	HCFC1	9606.ENSP00000410059	9606.ENSP00000309555	0	0	0	0	0.083	0.411	0	0	0.436
EEF1D	RPLP1	9606.ENSP00000410059	9606.ENSP00000346037	0.045	0	0	0	0.838	0.656	0	0.119	0.947
EEF1D	RPL22L1	9606.ENSP00000410059	9606.ENSP00000346080	0	0	0	0	0.443	0.458	0	0.083	0.699
EEF1D	PCNT	9606.ENSP00000410059	9606.ENSP00000352572	0	0	0	0	0	0	0	0.431	0.431
EEF1D	HNRNPK	9606.ENSP00000410059	9606.ENSP00000365439	0	0	0	0	0.098	0.272	0	0.234	0.453
EEF1D	NUCB1	9606.ENSP00000410059	9606.ENSP00000385923	0	0	0	0	0.063	0	0	0.462	0.474
EEF1D	NSFL1C	9606.ENSP00000410059	9606.ENSP00000418529	0	0	0	0	0.062	0	0	0.491	0.502
EEF1D	RPLP0	9606.ENSP00000410059	9606.ENSP00000449328	0.042	0	0	0	0.809	0.788	0	0.249	0.967
EIF2B5	EIF5	9606.ENSP00000273783	9606.ENSP00000216554	0	0	0	0	0.091	0.38	0	0.854	0.91
EIF2B5	AKT1	9606.ENSP00000273783	9606.ENSP00000451828	0	0	0	0	0.06	0.057	0	0.438	0.459
EIF2B5	EIF4G2	9606.ENSP00000273783	9606.ENSP00000433664	0	0	0	0	0.134	0	0	0.445	0.499
EIF2B5	SDPR	9606.ENSP00000273783	9606.ENSP00000305675	0	0	0	0	0	0	0	0.499	0.499
EIF2B5	EIF4G3	9606.ENSP00000273783	9606.ENSP00000383274	0	0	0	0	0.13	0.272	0	0.461	0.629
EIF2B5	EIF3B	9606.ENSP00000273783	9606.ENSP00000354125	0	0	0	0	0.126	0	0	0.652	0.683
EIF3B	PSMA3	9606.ENSP00000354125	9606.ENSP00000216455	0	0	0	0	0.73	0	0	0	0.73
EIF3B	EIF5	9606.ENSP00000354125	9606.ENSP00000216554	0	0	0	0	0.569	0.97	0.6	0.879	0.999
EIF3B	TRIM28	9606.ENSP00000354125	9606.ENSP00000253024	0	0	0	0	0.378	0	0	0.127	0.434
EIF3B	NSUN2	9606.ENSP00000354125	9606.ENSP00000264670	0	0	0	0	0.827	0	0	0.15	0.847
EIF3B	EIF2B5	9606.ENSP00000354125	9606.ENSP00000273783	0	0	0	0	0.126	0	0	0.652	0.683
EIF3B	RPS3	9606.ENSP00000354125	9606.ENSP00000278572	0	0	0	0	0.781	0.686	0.6	0.684	0.99
EIF3B	DENR	9606.ENSP00000354125	9606.ENSP00000280557	0	0	0	0	0.106	0.369	0	0.386	0.623
EIF3B	PA2G4	9606.ENSP00000354125	9606.ENSP00000302886	0	0	0	0	0.848	0.067	0	0.066	0.856
EIF3B	EDC3	9606.ENSP00000354125	9606.ENSP00000320503	0	0	0	0	0.104	0	0	0.435	0.472
EIF3B	KRI1	9606.ENSP00000354125	9606.ENSP00000320917	0	0	0	0	0.407	0	0	0.095	0.44
EIF3B	HSP90AA1	9606.ENSP00000354125	9606.ENSP00000335153	0	0	0	0	0.53	0	0	0.146	0.582
EIF3B	HNRNPA1	9606.ENSP00000354125	9606.ENSP00000341826	0	0	0	0	0.321	0.056	0	0.333	0.535
EIF3B	RPLP1	9606.ENSP00000354125	9606.ENSP00000346037	0	0	0	0	0.487	0	0	0.345	0.649
EIF3B	HNRNPH1	9606.ENSP00000354125	9606.ENSP00000349168	0	0	0	0	0.287	0	0	0.193	0.401
EIF3B	HSP90AB1	9606.ENSP00000354125	9606.ENSP00000360609	0	0	0	0	0.444	0	0	0.085	0.47
EIF3B	PWP1	9606.ENSP00000354125	9606.ENSP00000387365	0	0	0	0	0.493	0	0	0	0.493
EIF3B	EIF4G2	9606.ENSP00000354125	9606.ENSP00000433664	0	0	0	0	0.452	0.128	0	0.606	0.795
EIF3B	RPLP0	9606.ENSP00000354125	9606.ENSP00000449328	0	0	0	0	0.802	0	0	0.235	0.842
EIF3B	EIF4G3	9606.ENSP00000354125	9606.ENSP00000383274	0	0	0	0	0.427	0.37	0	0.654	0.864
EIF3B	DKC1	9606.ENSP00000354125	9606.ENSP00000358563	0	0	0	0	0.836	0.369	0	0.128	0.902
EIF4G2	EIF5	9606.ENSP00000433664	9606.ENSP00000216554	0	0	0	0	0.174	0.455	0	0.713	0.86
EIF4G2	KPNA3	9606.ENSP00000433664	9606.ENSP00000261667	0	0	0	0	0.103	0	0	0.456	0.491
EIF4G2	EIF2B5	9606.ENSP00000433664	9606.ENSP00000273783	0	0	0	0	0.134	0	0	0.445	0.499
EIF4G2	PDCD4	9606.ENSP00000433664	9606.ENSP00000280154	0	0	0	0	0.065	0.182	0	0.385	0.489
EIF4G2	DENR	9606.ENSP00000433664	9606.ENSP00000280557	0	0	0	0	0.064	0.16	0	0.331	0.428
EIF4G2	HNRNPU	9606.ENSP00000433664	9606.ENSP00000283179	0	0	0	0	0.131	0	0	0.42	0.475
EIF4G2	TNS3	9606.ENSP00000433664	9606.ENSP00000312143	0	0	0	0	0.068	0.058	0	0.397	0.425
EIF4G2	ZNF609	9606.ENSP00000433664	9606.ENSP00000316527	0	0	0	0	0	0	0	0.557	0.557
EIF4G2	EDC3	9606.ENSP00000433664	9606.ENSP00000320503	0	0	0	0	0.097	0	0	0.369	0.405
EIF4G2	HNRNPA1	9606.ENSP00000433664	9606.ENSP00000341826	0	0	0	0	0.138	0.142	0	0.254	0.401
EIF4G2	EIF3B	9606.ENSP00000433664	9606.ENSP00000354125	0	0	0	0	0.452	0.128	0	0.606	0.795
EIF4G2	DKC1	9606.ENSP00000433664	9606.ENSP00000358563	0	0	0	0	0.133	0.169	0	0.311	0.461
EIF4G2	HNRNPK	9606.ENSP00000433664	9606.ENSP00000365439	0	0	0	0	0.244	0	0	0.461	0.576
EIF4G2	HNRNPA3	9606.ENSP00000433664	9606.ENSP00000376309	0	0	0	0	0.12	0.142	0	0.448	0.547
EIF4G2	EIF4G3	9606.ENSP00000433664	9606.ENSP00000383274	0	0	0	0.653	0.093	0.854	0.9	0.708	0.989
EIF4G2	PWP1	9606.ENSP00000433664	9606.ENSP00000387365	0	0	0	0	0.486	0	0	0	0.486
EIF4G3	EIF5	9606.ENSP00000383274	9606.ENSP00000216554	0	0	0	0	0.138	0.344	0	0.591	0.748
EIF4G3	EIF2B5	9606.ENSP00000383274	9606.ENSP00000273783	0	0	0	0	0.13	0.272	0	0.461	0.629
EIF4G3	EDC3	9606.ENSP00000383274	9606.ENSP00000320503	0	0	0	0	0.049	0	0	0.546	0.55
EIF4G3	EIF3B	9606.ENSP00000383274	9606.ENSP00000354125	0	0	0	0	0.427	0.37	0	0.654	0.864
EIF4G3	PWP1	9606.ENSP00000383274	9606.ENSP00000387365	0	0	0	0	0.474	0	0	0	0.474
EIF4G3	EIF4G2	9606.ENSP00000383274	9606.ENSP00000433664	0	0	0	0.653	0.093	0.854	0.9	0.708	0.989
EIF5	HSP90AA1	9606.ENSP00000216554	9606.ENSP00000335153	0	0	0	0	0.363	0	0	0.152	0.437
EIF5	ZC3H4	9606.ENSP00000216554	9606.ENSP00000253048	0	0	0	0	0.062	0	0	0.468	0.479
EIF5	DENR	9606.ENSP00000216554	9606.ENSP00000280557	0	0	0	0	0.145	0.369	0	0.516	0.716
EIF5	EIF4G3	9606.ENSP00000216554	9606.ENSP00000383274	0	0	0	0	0.138	0.344	0	0.591	0.748
EIF5	RPS3	9606.ENSP00000216554	9606.ENSP00000278572	0	0	0	0	0.242	0.577	0	0.524	0.834
EIF5	EIF4G2	9606.ENSP00000216554	9606.ENSP00000433664	0	0	0	0	0.174	0.455	0	0.713	0.86
EIF5	EIF2B5	9606.ENSP00000216554	9606.ENSP00000273783	0	0	0	0	0.091	0.38	0	0.854	0.91
EIF5	EIF3B	9606.ENSP00000216554	9606.ENSP00000354125	0	0	0	0	0.569	0.97	0.6	0.879	0.999
ELAC2	NSUN2	9606.ENSP00000337445	9606.ENSP00000264670	0	0	0	0	0.355	0	0	0.442	0.625
ELF1	NFKB1	9606.ENSP00000239882	9606.ENSP00000226574	0	0	0	0	0.13	0.494	0	0.149	0.593
ELF1	EEF1D	9606.ENSP00000239882	9606.ENSP00000410059	0	0	0	0	0.086	0	0	0.428	0.454
EML4	RANBP2	9606.ENSP00000320663	9606.ENSP00000283195	0	0	0	0	0.062	0.108	0	0.482	0.529
EML4	NPM1	9606.ENSP00000320663	9606.ENSP00000296930	0	0	0	0	0.066	0.07	0	0.684	0.702
EML4	ETV6	9606.ENSP00000320663	9606.ENSP00000379658	0	0	0	0	0	0	0	0.459	0.459
EML4	HSP90AB1	9606.ENSP00000320663	9606.ENSP00000360609	0	0	0	0	0	0	0	0.546	0.546
EML4	AKT1	9606.ENSP00000320663	9606.ENSP00000451828	0	0	0	0	0	0.071	0	0.565	0.578
EML4	HSP90AA1	9606.ENSP00000320663	9606.ENSP00000335153	0	0	0	0	0	0	0	0.707	0.707
ENSA	GLCCI1	9606.ENSP00000341743	9606.ENSP00000223145	0	0	0	0	0	0	0	0.42	0.42
ENSA	ANP32A	9606.ENSP00000341743	9606.ENSP00000417864	0	0	0	0	0.062	0	0	0.393	0.406
ENSA	MINK1	9606.ENSP00000341743	9606.ENSP00000347427	0	0	0	0	0	0	0	0.871	0.872
EP300	CBX5	9606.ENSP00000263253	9606.ENSP00000209875	0	0	0	0	0.064	0.184	0	0.309	0.426
EP300	STUB1	9606.ENSP00000263253	9606.ENSP00000219548	0	0	0	0	0	0	0	0.488	0.488
EP300	NFKB1	9606.ENSP00000263253	9606.ENSP00000226574	0	0	0	0	0	0.873	0.9	0.438	0.992
EP300	MAPK14	9606.ENSP00000263253	9606.ENSP00000229795	0	0	0	0	0	0.525	0.9	0.323	0.965
EP300	HIST1H1A	9606.ENSP00000263253	9606.ENSP00000244573	0	0	0	0	0	0.498	0	0.136	0.548
EP300	PIAS1	9606.ENSP00000263253	9606.ENSP00000249636	0	0	0	0	0.098	0.297	0	0.49	0.649
EP300	TRIM28	9606.ENSP00000263253	9606.ENSP00000253024	0	0	0	0	0.057	0.104	0	0.351	0.404
EP300	SMARCC1	9606.ENSP00000263253	9606.ENSP00000254480	0	0	0	0	0.076	0.317	0	0.397	0.587
EP300	MAPK3	9606.ENSP00000263253	9606.ENSP00000263025	0	0	0	0	0	0.114	0	0.69	0.714
EP300	ATF7IP	9606.ENSP00000263253	9606.ENSP00000440440	0	0	0	0	0.088	0	0	0.422	0.451
EP300	IKZF1	9606.ENSP00000263253	9606.ENSP00000331614	0	0	0	0	0.062	0.126	0	0.391	0.457
EP300	TAF12	9606.ENSP00000263253	9606.ENSP00000263974	0	0	0	0	0.066	0.332	0	0.207	0.462
EP300	CBX3	9606.ENSP00000263253	9606.ENSP00000336687	0	0	0	0	0.064	0.184	0	0.372	0.479
EP300	SMC3	9606.ENSP00000263253	9606.ENSP00000354720	0	0	0	0	0.063	0.158	0	0.402	0.487
EP300	MCM3	9606.ENSP00000263253	9606.ENSP00000480987	0	0	0	0	0.062	0.434	0	0.193	0.534
EP300	MECP2	9606.ENSP00000263253	9606.ENSP00000395535	0	0	0	0	0.062	0.173	0	0.459	0.543
EP300	NIPBL	9606.ENSP00000263253	9606.ENSP00000282516	0	0	0	0	0.11	0.093	0	0.481	0.545
EP300	LRRFIP1	9606.ENSP00000263253	9606.ENSP00000375857	0	0	0	0	0	0	0	0.562	0.562
EP300	RERE	9606.ENSP00000263253	9606.ENSP00000338629	0	0	0	0	0.094	0.27	0	0.398	0.567
EP300	TP53BP1	9606.ENSP00000263253	9606.ENSP00000371475	0	0	0	0	0.066	0.405	0	0.324	0.591
EP300	SMARCC2	9606.ENSP00000263253	9606.ENSP00000267064	0	0	0	0	0.122	0.317	0	0.389	0.602
EP300	HSP90AA1	9606.ENSP00000263253	9606.ENSP00000335153	0	0.005	0	0	0	0.285	0	0.475	0.609
EP300	SET	9606.ENSP00000263253	9606.ENSP00000361777	0	0	0	0	0.064	0.359	0	0.448	0.64
EP300	NPM1	9606.ENSP00000263253	9606.ENSP00000296930	0	0	0	0	0	0.495	0	0.349	0.657
EP300	HCFC1	9606.ENSP00000263253	9606.ENSP00000309555	0	0	0	0	0.507	0.149	0	0.281	0.672
EP300	DNMT1	9606.ENSP00000263253	9606.ENSP00000352516	0	0	0	0	0.062	0	0	0.669	0.676
EP300	RBL1	9606.ENSP00000263253	9606.ENSP00000362768	0	0	0	0	0.062	0.426	0	0.47	0.69
EP300	SRRM2	9606.ENSP00000263253	9606.ENSP00000301740	0	0	0	0	0.655	0.129	0	0.07	0.696
EP300	DEK	9606.ENSP00000263253	9606.ENSP00000380414	0	0	0	0	0.062	0.27	0.6	0.303	0.783
EP300	USP7	9606.ENSP00000263253	9606.ENSP00000343535	0	0	0	0	0.122	0.092	0.6	0.403	0.784
EP300	THRAP3	9606.ENSP00000263253	9606.ENSP00000346634	0	0	0	0	0.065	0.129	0.8	0.087	0.831
EP300	TLE3	9606.ENSP00000263253	9606.ENSP00000452871	0	0	0	0	0.065	0	0.8	0.272	0.852
EP300	HNRNPU	9606.ENSP00000263253	9606.ENSP00000283179	0	0	0	0	0.062	0.27	0	0.82	0.866
EP300	YAP1	9606.ENSP00000263253	9606.ENSP00000478927	0	0	0	0	0.062	0.319	0	0.816	0.872
EP300	HMGN1	9606.ENSP00000263253	9606.ENSP00000370125	0	0	0	0	0	0.27	0.8	0.381	0.901
EP300	HIST1H1E	9606.ENSP00000263253	9606.ENSP00000307705	0	0	0	0	0	0.06	0.9	0.225	0.92
EP300	CRTC2	9606.ENSP00000263253	9606.ENSP00000357622	0	0	0	0	0.054	0.27	0.8	0.565	0.932
EP300	HIST1H3A	9606.ENSP00000263253	9606.ENSP00000480826	0	0	0	0	0	0.925	0	0.238	0.94
EP300	PML	9606.ENSP00000263253	9606.ENSP00000268058	0	0	0	0	0.057	0.226	0.9	0.306	0.942
EP300	ING4	9606.ENSP00000263253	9606.ENSP00000380024	0	0	0	0	0.067	0.317	0	0.922	0.946
EP300	MAPK8	9606.ENSP00000263253	9606.ENSP00000378974	0	0	0	0	0.062	0.27	0.9	0.343	0.949
EP300	SNIP1	9606.ENSP00000263253	9606.ENSP00000296215	0	0	0	0	0.064	0.345	0.9	0.515	0.966
EP300	NFATC2	9606.ENSP00000263253	9606.ENSP00000379330	0	0	0	0	0.062	0.429	0.9	0.471	0.967
EP300	POLR2A	9606.ENSP00000263253	9606.ENSP00000480158	0	0	0	0	0.111	0.555	0.9	0.427	0.974
EP300	MEF2C	9606.ENSP00000263253	9606.ENSP00000340874	0	0	0	0	0	0.538	0.9	0.596	0.979
EP300	CHD4	9606.ENSP00000263253	9606.ENSP00000349508	0	0	0	0	0.064	0.65	0.9	0.642	0.986
EP300	FOXO1	9606.ENSP00000263253	9606.ENSP00000368880	0	0	0	0	0.063	0.807	0.9	0.842	0.996
EP300	HDAC2	9606.ENSP00000263253	9606.ENSP00000430432	0	0	0	0	0.064	0.289	0.9	0.955	0.996
EP300	AKT1	9606.ENSP00000263253	9606.ENSP00000451828	0	0	0	0	0	0.885	0.9	0.903	0.998
EP300	HDAC1	9606.ENSP00000263253	9606.ENSP00000362649	0	0	0	0	0.064	0.9	0.9	0.983	0.999
EP300	NCOA1	9606.ENSP00000263253	9606.ENSP00000385216	0	0	0	0	0.062	0.779	0.9	0.962	0.999
EP300	NCOA3	9606.ENSP00000263253	9606.ENSP00000361066	0	0	0	0	0.065	0.893	0.9	0.982	0.999
EP300	IRF3	9606.ENSP00000263253	9606.ENSP00000471896	0	0	0	0	0	0.898	0.8	0.989	0.999
EP300	MYC	9606.ENSP00000263253	9606.ENSP00000479618	0	0	0	0	0.062	0.78	0.9	0.987	0.999
EPB41L2	MYH9	9606.ENSP00000338481	9606.ENSP00000216181	0	0	0	0	0.062	0.368	0	0.214	0.493
EPB41L2	EPB41L3	9606.ENSP00000338481	9606.ENSP00000343158	0	0	0	0.905	0	0.488	0	0.807	0.526
EPB41L2	NUMA1	9606.ENSP00000338481	9606.ENSP00000377298	0	0	0	0	0	0.27	0	0.662	0.743
EPB41L2	SPTBN1	9606.ENSP00000338481	9606.ENSP00000349259	0	0	0	0	0.183	0.176	0.72	0.221	0.833
EPB41L2	SPTAN1	9606.ENSP00000338481	9606.ENSP00000361824	0	0	0	0	0.174	0.296	0.72	0.341	0.878
EPB41L3	HNRNPUL2	9606.ENSP00000343158	9606.ENSP00000301785	0	0	0	0	0	0	0	0.423	0.423
EPB41L3	EPB41L2	9606.ENSP00000343158	9606.ENSP00000338481	0	0	0	0.905	0	0.488	0	0.807	0.526
EPB41L3	PPP1R9B	9606.ENSP00000343158	9606.ENSP00000478767	0	0	0	0	0.062	0.372	0	0.094	0.419
EPB41L3	NUMA1	9606.ENSP00000343158	9606.ENSP00000377298	0	0	0	0	0	0.115	0	0.431	0.475
EPB41L3	SPTAN1	9606.ENSP00000343158	9606.ENSP00000361824	0	0	0	0	0.158	0.125	0	0.84	0.872
EPB41L3	SPTBN1	9606.ENSP00000343158	9606.ENSP00000349259	0	0	0	0	0.157	0.317	0	0.879	0.925
EPSTI1	AKT1	9606.ENSP00000318982	9606.ENSP00000451828	0	0	0	0	0	0.059	0	0.435	0.445
ERBB2IP	STUB1	9606.ENSP00000426632	9606.ENSP00000219548	0	0	0	0	0	0.056	0.9	0	0.901
ERBB2IP	RBM25	9606.ENSP00000426632	9606.ENSP00000261973	0	0	0	0	0.099	0.349	0	0.097	0.424
ERBB2IP	TMPO	9606.ENSP00000426632	9606.ENSP00000266732	0	0	0	0	0	0	0	0.72	0.72
ERBB2IP	NIPBL	9606.ENSP00000426632	9606.ENSP00000282516	0	0	0	0	0.653	0	0	0	0.653
ERBB2IP	HSP90AA1	9606.ENSP00000426632	9606.ENSP00000335153	0	0	0	0	0	0.281	0.6	0.103	0.719
ERBB2IP	MYC	9606.ENSP00000426632	9606.ENSP00000479618	0	0	0	0	0.062	0.122	0	0.579	0.623
ETV6	MYH9	9606.ENSP00000379658	9606.ENSP00000216181	0	0	0	0	0.064	0	0	0.474	0.486
ETV6	BIN2	9606.ENSP00000379658	9606.ENSP00000267012	0	0	0	0	0.063	0	0.6	0.048	0.612
ETV6	NPM1	9606.ENSP00000379658	9606.ENSP00000296930	0	0	0	0	0	0.06	0	0.605	0.612
ETV6	EML4	9606.ENSP00000379658	9606.ENSP00000320663	0	0	0	0	0	0	0	0.459	0.459
ETV6	IKZF1	9606.ENSP00000379658	9606.ENSP00000331614	0	0	0	0	0.084	0.058	0	0.717	0.734
ETV6	SPTBN1	9606.ENSP00000379658	9606.ENSP00000349259	0	0	0	0	0	0.057	0.6	0.142	0.648
ETV6	TP53BP1	9606.ENSP00000379658	9606.ENSP00000371475	0	0	0	0	0	0.405	0	0.074	0.425
ETV6	SRSF2	9606.ENSP00000379658	9606.ENSP00000376276	0	0	0	0	0	0	0	0.61	0.61
ETV6	MYH11	9606.ENSP00000379658	9606.ENSP00000379616	0	0	0	0	0.064	0	0	0.471	0.483
ETV6	FLI1	9606.ENSP00000379658	9606.ENSP00000433488	0	0	0	0.588	0	0.344	0	0.239	0.4
ETV6	MYC	9606.ENSP00000379658	9606.ENSP00000479618	0	0	0	0	0.062	0.108	0	0.46	0.508
ETV6	MYO18A	9606.ENSP00000379658	9606.ENSP00000437073	0	0	0	0	0.052	0	0.6	0.553	0.815
EVI2B	DOCK2	9606.ENSP00000333779	9606.ENSP00000256935	0	0	0	0	0.563	0	0	0.124	0.601
EVI2B	BIN2	9606.ENSP00000333779	9606.ENSP00000267012	0	0	0	0	0.55	0	0	0.167	0.609
EVI2B	IKZF1	9606.ENSP00000333779	9606.ENSP00000331614	0	0	0	0	0.418	0	0	0.066	0.433
EVI2B	MAP4K1	9606.ENSP00000333779	9606.ENSP00000465039	0	0	0	0	0.089	0	0	0.371	0.403
EVI2B	LCP1	9606.ENSP00000333779	9606.ENSP00000381581	0	0	0	0	0.523	0	0	0	0.523
EVI2B	SASH3	9606.ENSP00000333779	9606.ENSP00000349359	0	0	0	0	0.417	0	0	0.345	0.602
EVI2B	FYB	9606.ENSP00000333779	9606.ENSP00000427114	0	0	0	0	0.561	0	0	0.181	0.625
EVI2B	PTPRC	9606.ENSP00000333779	9606.ENSP00000411355	0	0	0	0	0.742	0	0	0.196	0.784
EVL	VASP	9606.ENSP00000376652	9606.ENSP00000245932	0	0	0	0.912	0	0.871	0.8	0.798	0.974
EVL	ZYX	9606.ENSP00000376652	9606.ENSP00000324422	0	0	0	0	0.062	0.675	0	0.547	0.849
EVL	SPTAN1	9606.ENSP00000376652	9606.ENSP00000361824	0	0	0	0	0.065	0.505	0	0.285	0.641
EVL	ABI1	9606.ENSP00000376652	9606.ENSP00000365312	0	0	0	0	0.065	0.429	0	0.189	0.529
EVL	FYB	9606.ENSP00000376652	9606.ENSP00000427114	0	0	0	0	0.089	0.462	0.6	0.195	0.821
FAM103A1	CMTR1	9606.ENSP00000307181	9606.ENSP00000362550	0	0	0	0	0	0	0	0.66	0.66
FAM129A	NPM1	9606.ENSP00000356481	9606.ENSP00000296930	0	0	0	0	0	0.27	0	0.826	0.867
FAM129A	SYNPO2	9606.ENSP00000356481	9606.ENSP00000306015	0	0	0	0	0.065	0	0	0.541	0.553
FAM134A	ARHGAP1	9606.ENSP00000395249	9606.ENSP00000310491	0	0	0	0	0	0	0	0.604	0.604
FAM134C	RTN4	9606.ENSP00000309432	9606.ENSP00000337838	0	0	0	0	0	0.231	0	0.282	0.424
FGFR1OP	VASP	9606.ENSP00000355812	9606.ENSP00000245932	0	0	0	0	0	0.413	0	0	0.412
FGFR1OP	ZNF609	9606.ENSP00000355812	9606.ENSP00000316527	0	0	0	0	0	0	0	0.419	0.419
FGFR1OP	WRNIP1	9606.ENSP00000355812	9606.ENSP00000370150	0	0	0	0	0	0.27	0	0.393	0.538
FGFR1OP	LRRFIP1	9606.ENSP00000355812	9606.ENSP00000375857	0	0	0	0	0	0	0.5	0.254	0.611
FGFR1OP	MYO18A	9606.ENSP00000355812	9606.ENSP00000437073	0	0	0	0	0	0	0.5	0.649	0.816
FGFR1OP	CEP350	9606.ENSP00000355812	9606.ENSP00000356579	0	0	0	0	0	0.897	0	0.828	0.981
FILIP1L	DBNL	9606.ENSP00000346560	9606.ENSP00000417653	0	0	0	0	0	0	0	0.511	0.511
FILIP1L	ARHGAP27	9606.ENSP00000346560	9606.ENSP00000403323	0	0	0	0	0	0	0	0.52	0.52
FKBP15	PPIG	9606.ENSP00000238256	9606.ENSP00000260970	0	0	0	0	0.058	0.175	0	0.303	0.411
FKBP15	DNAJC13	9606.ENSP00000238256	9606.ENSP00000260818	0	0	0	0	0.184	0	0	0.321	0.422
FKBP15	DFFA	9606.ENSP00000238256	9606.ENSP00000366237	0	0	0	0	0	0	0	0.444	0.444
FKBP15	NSUN2	9606.ENSP00000238256	9606.ENSP00000264670	0	0	0	0	0.36	0.111	0	0.188	0.497
FKBP15	PA2G4	9606.ENSP00000238256	9606.ENSP00000302886	0	0	0	0	0.57	0.058	0	0.049	0.581
FKBP15	TBC1D5	9606.ENSP00000238256	9606.ENSP00000402935	0	0	0	0	0.062	0.059	0	0.582	0.599
FKBP15	MPHOSPH10	9606.ENSP00000238256	9606.ENSP00000244230	0	0	0	0	0.6	0.183	0	0	0.659
FKBP15	DKC1	9606.ENSP00000238256	9606.ENSP00000358563	0	0	0	0	0.743	0.173	0	0	0.778
FKBP15	PWP1	9606.ENSP00000238256	9606.ENSP00000387365	0	0	0	0	0.666	0.215	0	0.22	0.778
FKBP15	KRI1	9606.ENSP00000238256	9606.ENSP00000320917	0	0	0	0	0.824	0	0	0	0.824
FLI1	ETV6	9606.ENSP00000433488	9606.ENSP00000379658	0	0	0	0.588	0	0.344	0	0.239	0.4
FLI1	LCP1	9606.ENSP00000433488	9606.ENSP00000381581	0	0	0	0	0.137	0	0	0.365	0.428
FLNA	VCL	9606.ENSP00000358866	9606.ENSP00000211998	0	0	0	0	0.556	0.149	0.9	0.678	0.986
FLNA	MYH9	9606.ENSP00000358866	9606.ENSP00000216181	0	0	0	0	0.195	0.46	0	0.505	0.766
FLNA	TUBB1	9606.ENSP00000358866	9606.ENSP00000217133	0	0	0	0	0.062	0.134	0	0.371	0.444
FLNA	MAPK14	9606.ENSP00000358866	9606.ENSP00000229795	0	0	0	0	0.079	0.302	0	0.459	0.622
FLNA	VASP	9606.ENSP00000358866	9606.ENSP00000245932	0	0	0	0	0.1	0.076	0	0.463	0.514
FLNA	MAPK3	9606.ENSP00000358866	9606.ENSP00000263025	0	0	0	0	0.049	0.078	0	0.52	0.543
FLNA	PXN	9606.ENSP00000358866	9606.ENSP00000267257	0	0	0	0	0.11	0.149	0	0.577	0.652
FLNA	RPS3	9606.ENSP00000358866	9606.ENSP00000278572	0	0	0	0	0.062	0.102	0	0.384	0.436
FLNA	DBN1	9606.ENSP00000358866	9606.ENSP00000292385	0	0	0	0	0.064	0.561	0	0.352	0.711
FLNA	SYNPO2	9606.ENSP00000358866	9606.ENSP00000306015	0	0	0	0	0.063	0.556	0	0.148	0.615
FLNA	PDLIM2	9606.ENSP00000358866	9606.ENSP00000312634	0	0	0	0	0	0.176	0	0.523	0.59
FLNA	ZYX	9606.ENSP00000358866	9606.ENSP00000324422	0	0	0	0	0.214	0.059	0	0.428	0.54
FLNA	HSP90AA1	9606.ENSP00000358866	9606.ENSP00000335153	0	0	0	0	0.052	0.126	0	0.398	0.458
FLNA	FN1	9606.ENSP00000358866	9606.ENSP00000346839	0	0	0	0	0.096	0.063	0	0.521	0.559
FLNA	SORBS2	9606.ENSP00000358866	9606.ENSP00000347852	0	0	0	0	0.062	0.492	0	0.082	0.524
FLNA	SPTBN1	9606.ENSP00000358866	9606.ENSP00000349259	0	0	0	0.542	0.086	0.282	0	0.304	0.401
FLNA	AKAP13	9606.ENSP00000358866	9606.ENSP00000354718	0	0	0	0	0.062	0.07	0	0.378	0.41
FLNA	TAGLN2	9606.ENSP00000358866	9606.ENSP00000357076	0	0	0	0	0.208	0.167	0.9	0.307	0.948
FLNA	PPP1R12A	9606.ENSP00000358866	9606.ENSP00000389168	0	0	0	0	0	0.315	0	0.181	0.415
FLNA	PALLD	9606.ENSP00000358866	9606.ENSP00000425556	0	0	0	0	0.051	0.129	0	0.407	0.467
FLNA	AKAP2	9606.ENSP00000358866	9606.ENSP00000404782	0	0	0	0	0.068	0.482	0	0.06	0.507
FLNA	MYH11	9606.ENSP00000358866	9606.ENSP00000379616	0	0	0	0	0.068	0.188	0	0.494	0.584
FLNA	SPTAN1	9606.ENSP00000358866	9606.ENSP00000361824	0	0	0	0	0.064	0.278	0	0.44	0.589
FLNA	PPP1R9B	9606.ENSP00000358866	9606.ENSP00000478767	0	0	0	0	0.143	0.498	0	0.316	0.68
FLNA	AKT1	9606.ENSP00000358866	9606.ENSP00000451828	0	0	0	0	0.117	0.102	0	0.643	0.693
FLNA	CFL1	9606.ENSP00000358866	9606.ENSP00000432660	0	0	0	0	0.108	0.319	0	0.599	0.735
FLNA	ITGA4	9606.ENSP00000358866	9606.ENSP00000380227	0	0	0	0	0.065	0.294	0.6	0.176	0.753
FLNA	HSP90AB1	9606.ENSP00000358866	9606.ENSP00000360609	0	0	0	0	0.052	0.683	0	0.257	0.757
FLNA	MAPK8	9606.ENSP00000358866	9606.ENSP00000378974	0	0	0	0	0	0.059	0.9	0.199	0.918
FMNL1	VCL	9606.ENSP00000329219	9606.ENSP00000211998	0	0	0	0	0.059	0.077	0	0.511	0.538
FMNL1	MYH9	9606.ENSP00000329219	9606.ENSP00000216181	0	0	0	0	0.07	0.248	0	0.257	0.435
FMNL1	VASP	9606.ENSP00000329219	9606.ENSP00000245932	0	0	0	0	0	0.213	0	0.301	0.426
FMNL1	PPP1R12A	9606.ENSP00000329219	9606.ENSP00000389168	0	0	0	0	0.089	0.298	0	0.138	0.4
FMNL1	CFL1	9606.ENSP00000329219	9606.ENSP00000432660	0	0	0	0	0.063	0.077	0	0.369	0.406
FMNL1	LSP1	9606.ENSP00000329219	9606.ENSP00000371194	0	0	0	0	0.178	0.27	0	0.113	0.421
FMNL1	MYO9B	9606.ENSP00000329219	9606.ENSP00000471457	0	0	0	0	0.133	0.246	0	0.234	0.456
FMNL1	FNBP1	9606.ENSP00000329219	9606.ENSP00000413625	0	0	0	0	0.069	0.085	0	0.434	0.476
FMNL1	LCP1	9606.ENSP00000329219	9606.ENSP00000381581	0	0	0	0	0.157	0.24	0	0.312	0.521
FMNL1	PRPF40A	9606.ENSP00000329219	9606.ENSP00000386458	0	0	0	0	0	0.3	0	0.394	0.558
FMNL1	ARHGAP27	9606.ENSP00000329219	9606.ENSP00000403323	0	0	0	0	0.145	0.345	0	0.39	0.628
FMNL1	AKT1	9606.ENSP00000329219	9606.ENSP00000451828	0	0	0	0	0.062	0.119	0	0.703	0.733
FN1	VCL	9606.ENSP00000346839	9606.ENSP00000211998	0	0	0	0	0.086	0.074	0.5	0.966	0.984
FN1	MYH9	9606.ENSP00000346839	9606.ENSP00000216181	0	0	0	0	0.085	0.277	0	0.417	0.58
FN1	MAPK14	9606.ENSP00000346839	9606.ENSP00000229795	0	0	0	0	0	0	0	0.551	0.551
FN1	VASP	9606.ENSP00000346839	9606.ENSP00000245932	0	0	0	0	0.062	0.074	0	0.502	0.529
FN1	HSPB1	9606.ENSP00000346839	9606.ENSP00000248553	0	0	0	0	0.083	0.074	0	0.358	0.407
FN1	ARHGEF6	9606.ENSP00000346839	9606.ENSP00000250617	0	0	0	0	0	0	0	0.482	0.482
FN1	MAPK3	9606.ENSP00000346839	9606.ENSP00000263025	0	0	0	0	0	0	0.6	0.718	0.882
FN1	PXN	9606.ENSP00000346839	9606.ENSP00000267257	0	0	0	0	0.062	0.247	0.9	0.962	0.996
FN1	ZYX	9606.ENSP00000346839	9606.ENSP00000324422	0	0	0	0	0.062	0.271	0	0.632	0.727
FN1	HSP90AA1	9606.ENSP00000346839	9606.ENSP00000335153	0	0	0	0	0	0.074	0	0.578	0.592
FN1	MYH11	9606.ENSP00000346839	9606.ENSP00000379616	0	0	0	0	0	0	0	0.407	0.407
FN1	AHSG	9606.ENSP00000346839	9606.ENSP00000393887	0	0	0	0	0.087	0	0	0.39	0.419
FN1	PALLD	9606.ENSP00000346839	9606.ENSP00000425556	0	0	0	0	0.125	0	0	0.404	0.456
FN1	MAPK8	9606.ENSP00000346839	9606.ENSP00000378974	0	0	0	0	0	0	0	0.46	0.459
FN1	YAP1	9606.ENSP00000346839	9606.ENSP00000478927	0	0	0	0	0.214	0	0	0.406	0.513
FN1	CFL1	9606.ENSP00000346839	9606.ENSP00000432660	0	0	0	0	0.051	0.063	0	0.522	0.538
FN1	FLNA	9606.ENSP00000346839	9606.ENSP00000358866	0	0	0	0	0.096	0.063	0	0.521	0.559
FN1	MYC	9606.ENSP00000346839	9606.ENSP00000479618	0	0	0	0	0	0.122	0	0.664	0.692
FN1	NES	9606.ENSP00000346839	9606.ENSP00000357206	0	0	0	0	0.199	0	0	0.647	0.705
FN1	PTPRC	9606.ENSP00000346839	9606.ENSP00000411355	0	0	0	0	0.062	0	0	0.711	0.718
FN1	AKT1	9606.ENSP00000346839	9606.ENSP00000451828	0	0	0	0	0.051	0	0	0.776	0.778
FN1	PRKAR1A	9606.ENSP00000346839	9606.ENSP00000376475	0	0	0	0	0	0	0.9	0.088	0.904
FN1	ITGA4	9606.ENSP00000346839	9606.ENSP00000380227	0	0	0	0	0.051	0.487	0.9	0.988	0.999
FNBP1	BIN1	9606.ENSP00000413625	9606.ENSP00000316779	0	0	0	0	0.062	0.095	0	0.47	0.51
FNBP1	FMNL1	9606.ENSP00000413625	9606.ENSP00000329219	0	0	0	0	0.069	0.085	0	0.434	0.476
FNBP1	OSTF1	9606.ENSP00000413625	9606.ENSP00000340836	0	0	0	0	0	0	0	0.43	0.43
FNBP1	ABI1	9606.ENSP00000413625	9606.ENSP00000365312	0	0	0	0	0.062	0.21	0	0.757	0.804
FNBP1	ITSN1	9606.ENSP00000413625	9606.ENSP00000370719	0	0	0	0	0.062	0.293	0	0.354	0.534
FNBP1	DBNL	9606.ENSP00000413625	9606.ENSP00000417653	0	0	0	0	0	0	0	0.488	0.488
FNBP1	PACSIN1	9606.ENSP00000413625	9606.ENSP00000484060	0	0	0	0	0.062	0	0	0.637	0.645
FNBP1	TNKS1BP1	9606.ENSP00000413625	9606.ENSP00000437271	0	0	0	0	0	0	0	0.72	0.72
FOXO1	STUB1	9606.ENSP00000368880	9606.ENSP00000219548	0	0	0	0	0	0.282	0	0.472	0.605
FOXO1	PRKAB1	9606.ENSP00000368880	9606.ENSP00000229328	0	0	0	0	0	0	0.6	0.142	0.642
FOXO1	MAPK14	9606.ENSP00000368880	9606.ENSP00000229795	0	0	0	0	0	0.057	0.6	0.411	0.758
FOXO1	BACH2	9606.ENSP00000368880	9606.ENSP00000257749	0	0	0	0	0.062	0	0	0.398	0.411
FOXO1	MAPK3	9606.ENSP00000368880	9606.ENSP00000263025	0	0	0	0	0	0.057	0.8	0.561	0.91
FOXO1	EP300	9606.ENSP00000368880	9606.ENSP00000263253	0	0	0	0	0.063	0.807	0.9	0.842	0.996
FOXO1	PML	9606.ENSP00000368880	9606.ENSP00000268058	0	0	0	0	0	0.281	0	0.948	0.961
FOXO1	IKZF1	9606.ENSP00000368880	9606.ENSP00000331614	0	0	0	0	0	0.078	0	0.424	0.446
FOXO1	MEF2C	9606.ENSP00000368880	9606.ENSP00000340874	0	0	0	0	0.062	0.168	0	0.412	0.501
FOXO1	USP7	9606.ENSP00000368880	9606.ENSP00000343535	0	0	0	0	0	0.057	0.8	0.27	0.85
FOXO1	TFEB	9606.ENSP00000368880	9606.ENSP00000351742	0	0	0	0	0	0.078	0	0.429	0.451
FOXO1	CRTC2	9606.ENSP00000368880	9606.ENSP00000357622	0	0	0	0	0	0	0	0.648	0.648
FOXO1	SET	9606.ENSP00000368880	9606.ENSP00000361777	0	0	0	0	0	0.486	0	0.082	0.507
FOXO1	STK4	9606.ENSP00000368880	9606.ENSP00000361892	0	0	0	0	0	0.27	0.8	0.369	0.899
FOXO1	HDAC1	9606.ENSP00000368880	9606.ENSP00000362649	0	0	0	0	0	0.142	0.6	0.406	0.778
FOXO1	PTPRC	9606.ENSP00000368880	9606.ENSP00000411355	0	0	0	0	0	0.063	0	0.402	0.415
FOXO1	YAP1	9606.ENSP00000368880	9606.ENSP00000478927	0	0	0	0	0	0	0	0.428	0.428
FOXO1	ACACA	9606.ENSP00000368880	9606.ENSP00000483300	0	0	0	0	0	0.078	0	0.45	0.471
FOXO1	NCOA1	9606.ENSP00000368880	9606.ENSP00000385216	0	0	0	0	0	0.298	0	0.377	0.544
FOXO1	AKT1S1	9606.ENSP00000368880	9606.ENSP00000375711	0	0	0	0	0	0	0	0.559	0.559
FOXO1	HDAC2	9606.ENSP00000368880	9606.ENSP00000430432	0	0	0	0	0	0.142	0.6	0.484	0.807
FOXO1	MAPK8	9606.ENSP00000368880	9606.ENSP00000378974	0	0	0	0	0	0.104	0.8	0.464	0.895
FOXO1	MYC	9606.ENSP00000368880	9606.ENSP00000479618	0	0	0	0	0	0.056	0.9	0.61	0.959
FOXO1	AKT1	9606.ENSP00000368880	9606.ENSP00000451828	0	0	0	0	0.048	0.889	0.9	0.859	0.998
FYB	PAG1	9606.ENSP00000427114	9606.ENSP00000220597	0	0	0	0	0.084	0.182	0	0.267	0.402
FYB	VASP	9606.ENSP00000427114	9606.ENSP00000245932	0	0	0	0	0.053	0.27	0.6	0.885	0.964
FYB	DOCK2	9606.ENSP00000427114	9606.ENSP00000256935	0	0	0	0	0.458	0.27	0	0.29	0.695
FYB	LY9	9606.ENSP00000427114	9606.ENSP00000263285	0	0	0	0	0.568	0	0	0.1	0.595
FYB	BIN2	9606.ENSP00000427114	9606.ENSP00000267012	0	0	0	0	0.568	0	0	0.337	0.701
FYB	IKZF1	9606.ENSP00000427114	9606.ENSP00000331614	0	0	0	0	0.617	0	0	0	0.617
FYB	EVI2B	9606.ENSP00000427114	9606.ENSP00000333779	0	0	0	0	0.561	0	0	0.181	0.625
FYB	BCL10	9606.ENSP00000427114	9606.ENSP00000359612	0	0	0	0	0	0.27	0	0.49	0.611
FYB	EVL	9606.ENSP00000427114	9606.ENSP00000376652	0	0	0	0	0.089	0.462	0.6	0.195	0.821
FYB	LCP1	9606.ENSP00000427114	9606.ENSP00000381581	0	0	0	0	0.392	0	0	0.275	0.54
FYB	DOCK8	9606.ENSP00000427114	9606.ENSP00000394888	0	0	0	0	0.359	0	0	0.218	0.477
FYB	PTPRC	9606.ENSP00000427114	9606.ENSP00000411355	0	0	0	0	0.777	0	0	0.298	0.837
FYB	DBNL	9606.ENSP00000427114	9606.ENSP00000417653	0	0	0	0	0.057	0.182	0	0.584	0.651
FYB	MAP4K1	9606.ENSP00000427114	9606.ENSP00000465039	0	0	0	0	0.096	0	0	0.39	0.425
GLCCI1	AKAP2	9606.ENSP00000223145	9606.ENSP00000404782	0	0	0	0	0	0	0	0.414	0.414
GLCCI1	ENSA	9606.ENSP00000223145	9606.ENSP00000341743	0	0	0	0	0	0	0	0.42	0.42
GTF2I	ARHGEF6	9606.ENSP00000460070	9606.ENSP00000250617	0	0	0	0	0	0	0	0.408	0.408
GTF2I	MAPK3	9606.ENSP00000460070	9606.ENSP00000263025	0	0	0	0	0	0.27	0	0.451	0.582
GTF2I	ARID3A	9606.ENSP00000460070	9606.ENSP00000263620	0	0	0	0	0	0	0	0.694	0.694
GTF2I	SLU7	9606.ENSP00000460070	9606.ENSP00000297151	0	0	0	0	0	0.27	0	0.268	0.443
GTF2I	HDAC1	9606.ENSP00000460070	9606.ENSP00000362649	0	0	0	0	0.104	0.27	0	0.633	0.739
GTF2I	NUCB1	9606.ENSP00000460070	9606.ENSP00000385923	0	0	0	0	0	0.483	0	0.049	0.487
GTF2I	HDAC2	9606.ENSP00000460070	9606.ENSP00000430432	0	0	0	0	0.066	0.659	0	0.44	0.806
GTF2I	AKT1	9606.ENSP00000460070	9606.ENSP00000451828	0	0	0	0	0	0	0	0.454	0.454
GTF2I	MYC	9606.ENSP00000460070	9606.ENSP00000479618	0	0	0	0	0	0.452	0	0.829	0.902
HCFC1	TRIM28	9606.ENSP00000309555	9606.ENSP00000253024	0	0	0	0	0.174	0.491	0	0.146	0.61
HCFC1	EP300	9606.ENSP00000309555	9606.ENSP00000263253	0	0	0	0	0.507	0.149	0	0.281	0.672
HCFC1	DIDO1	9606.ENSP00000309555	9606.ENSP00000266070	0	0	0	0	0.176	0.274	0	0.101	0.415
HCFC1	HDAC2	9606.ENSP00000309555	9606.ENSP00000430432	0	0	0	0	0.098	0.27	0	0.173	0.408
HCFC1	MCM3	9606.ENSP00000309555	9606.ENSP00000480987	0	0	0	0	0.353	0	0	0.138	0.418
HCFC1	MYC	9606.ENSP00000309555	9606.ENSP00000479618	0	0	0	0	0.065	0.195	0	0.295	0.423
HCFC1	EEF1D	9606.ENSP00000309555	9606.ENSP00000410059	0	0	0	0	0.083	0.411	0	0	0.436
HCFC1	POU2F2	9606.ENSP00000309555	9606.ENSP00000431603	0	0	0	0	0	0.111	0	0.537	0.57
HCFC1	HDAC1	9606.ENSP00000309555	9606.ENSP00000362649	0	0	0	0	0.288	0.27	0	0.386	0.653
HDAC1	CBX5	9606.ENSP00000362649	9606.ENSP00000209875	0	0	0	0	0.246	0.216	0	0.642	0.77
HDAC1	STUB1	9606.ENSP00000362649	9606.ENSP00000219548	0	0	0	0	0	0	0	0.404	0.404
HDAC1	NFKB1	9606.ENSP00000362649	9606.ENSP00000226574	0	0	0	0	0.074	0.894	0	0.971	0.996
HDAC1	MAPK14	9606.ENSP00000362649	9606.ENSP00000229795	0	0	0	0	0	0.299	0	0.236	0.442
HDAC1	TRIM28	9606.ENSP00000362649	9606.ENSP00000253024	0	0	0	0	0.226	0.686	0.9	0.867	0.996
HDAC1	SMARCC1	9606.ENSP00000362649	9606.ENSP00000254480	0	0	0	0	0.393	0.625	0	0.542	0.886
HDAC1	SRSF1	9606.ENSP00000362649	9606.ENSP00000258962	0	0	0	0	0.326	0	0	0.204	0.441
HDAC1	MAPK3	9606.ENSP00000362649	9606.ENSP00000263025	0	0	0	0	0	0.078	0	0.456	0.477
HDAC1	EP300	9606.ENSP00000362649	9606.ENSP00000263253	0	0	0	0	0.064	0.9	0.9	0.983	0.999
HDAC1	SMARCC2	9606.ENSP00000362649	9606.ENSP00000267064	0	0	0	0	0.174	0.292	0	0.454	0.653
HDAC1	PML	9606.ENSP00000362649	9606.ENSP00000268058	0	0	0	0	0.062	0.763	0.9	0.448	0.986
HDAC1	POGZ	9606.ENSP00000362649	9606.ENSP00000271715	0	0	0	0	0.221	0.174	0	0.454	0.619
HDAC1	NIPBL	9606.ENSP00000362649	9606.ENSP00000282516	0	0	0	0	0.062	0.155	0	0.449	0.526
HDAC1	HNRNPU	9606.ENSP00000362649	9606.ENSP00000283179	0	0	0	0	0.433	0	0	0.245	0.554
HDAC1	RANBP2	9606.ENSP00000362649	9606.ENSP00000283195	0	0	0	0	0.118	0.244	0.9	0.199	0.939
HDAC1	NPM1	9606.ENSP00000362649	9606.ENSP00000296930	0	0	0	0	0.166	0.289	0	0.38	0.6
HDAC1	E4F1	9606.ENSP00000362649	9606.ENSP00000301727	0	0	0	0	0	0.578	0	0.459	0.762
HDAC1	HCFC1	9606.ENSP00000362649	9606.ENSP00000309555	0	0	0	0	0.288	0.27	0	0.386	0.653
HDAC1	RAD9A	9606.ENSP00000362649	9606.ENSP00000311360	0	0	0	0	0.065	0.27	0	0.193	0.401
HDAC1	ZNF609	9606.ENSP00000362649	9606.ENSP00000316527	0	0	0	0	0	0.415	0	0	0.414
HDAC1	IKZF1	9606.ENSP00000362649	9606.ENSP00000331614	0	0	0	0	0	0.772	0	0.882	0.972
HDAC1	HSP90AA1	9606.ENSP00000362649	9606.ENSP00000335153	0	0	0	0	0.072	0.059	0	0.76	0.773
HDAC1	CBX3	9606.ENSP00000362649	9606.ENSP00000336687	0	0	0	0	0.146	0.216	0.65	0.595	0.892
HDAC1	RERE	9606.ENSP00000362649	9606.ENSP00000338629	0	0	0	0	0	0.86	0	0.731	0.96
HDAC1	MEF2C	9606.ENSP00000362649	9606.ENSP00000340874	0	0	0	0	0.052	0.14	0	0.551	0.603
HDAC1	USP7	9606.ENSP00000362649	9606.ENSP00000343535	0	0	0	0	0.097	0.486	0	0.575	0.786
HDAC1	IKZF3	9606.ENSP00000362649	9606.ENSP00000344544	0	0	0	0	0	0.327	0	0.181	0.425
HDAC1	ATN1	9606.ENSP00000362649	9606.ENSP00000349076	0	0	0	0	0	0.157	0.5	0.308	0.683
HDAC1	HNRNPH1	9606.ENSP00000362649	9606.ENSP00000349168	0	0	0	0	0.386	0	0	0.095	0.421
HDAC1	CHD4	9606.ENSP00000362649	9606.ENSP00000349508	0	0	0	0	0.443	0.943	0.9	0.99	0.999
HDAC1	DNMT1	9606.ENSP00000362649	9606.ENSP00000352516	0	0	0	0	0.188	0.903	0.9	0.993	0.999
HDAC1	SMC3	9606.ENSP00000362649	9606.ENSP00000354720	0.045	0	0	0	0.145	0.606	0	0.506	0.82
HDAC1	HSP90AB1	9606.ENSP00000362649	9606.ENSP00000360609	0	0	0	0	0.079	0.059	0	0.373	0.409
HDAC1	NCOA3	9606.ENSP00000362649	9606.ENSP00000361066	0	0	0	0	0.067	0	0	0.535	0.548
HDAC1	SET	9606.ENSP00000362649	9606.ENSP00000361777	0	0	0	0	0.572	0	0	0.184	0.636
HDAC1	MYH11	9606.ENSP00000362649	9606.ENSP00000379616	0	0	0	0	0.049	0.056	0	0.406	0.421
HDAC1	SCAF8	9606.ENSP00000362649	9606.ENSP00000413098	0	0	0	0	0.32	0.187	0	0.058	0.433
HDAC1	MAPK8	9606.ENSP00000362649	9606.ENSP00000378974	0	0	0	0	0	0.27	0	0.26	0.437
HDAC1	HNRNPK	9606.ENSP00000362649	9606.ENSP00000365439	0	0	0	0	0.331	0	0	0.201	0.443
HDAC1	POLR2A	9606.ENSP00000362649	9606.ENSP00000480158	0	0	0	0	0.138	0.102	0	0.344	0.448
HDAC1	SRSF2	9606.ENSP00000362649	9606.ENSP00000376276	0	0	0	0	0.368	0	0	0.198	0.472
HDAC1	TP53BP1	9606.ENSP00000362649	9606.ENSP00000371475	0	0	0	0	0.084	0.094	0	0.433	0.489
HDAC1	DPF2	9606.ENSP00000362649	9606.ENSP00000436901	0	0	0	0	0.167	0	0	0.442	0.516
HDAC1	MCM3	9606.ENSP00000362649	9606.ENSP00000480987	0	0	0	0	0.438	0.057	0	0.191	0.534
HDAC1	ING4	9606.ENSP00000362649	9606.ENSP00000380024	0	0	0	0	0.065	0.244	0	0.442	0.571
HDAC1	ANP32A	9606.ENSP00000362649	9606.ENSP00000417864	0	0	0	0	0.177	0.182	0	0.453	0.6
HDAC1	AKT1	9606.ENSP00000362649	9606.ENSP00000451828	0	0	0	0	0	0.078	0	0.598	0.614
HDAC1	CBX1	9606.ENSP00000362649	9606.ENSP00000377060	0	0	0	0	0.076	0.216	0	0.656	0.73
HDAC1	GTF2I	9606.ENSP00000362649	9606.ENSP00000460070	0	0	0	0	0.104	0.27	0	0.633	0.739
HDAC1	HIST1H3A	9606.ENSP00000362649	9606.ENSP00000480826	0.044	0	0	0	0.049	0.685	0	0.268	0.763
HDAC1	FOXO1	9606.ENSP00000362649	9606.ENSP00000368880	0	0	0	0	0	0.142	0.6	0.406	0.778
HDAC1	NFATC2	9606.ENSP00000362649	9606.ENSP00000379330	0	0	0	0	0.047	0.129	0	0.895	0.906
HDAC1	TLE3	9606.ENSP00000362649	9606.ENSP00000452871	0	0	0	0	0.099	0.651	0.6	0.861	0.98
HDAC1	MYC	9606.ENSP00000362649	9606.ENSP00000479618	0	0	0	0	0.077	0.772	0	0.96	0.991
HDAC1	RBL1	9606.ENSP00000362649	9606.ENSP00000362768	0	0	0	0	0.064	0.597	0.9	0.968	0.998
HDAC1	MECP2	9606.ENSP00000362649	9606.ENSP00000395535	0	0	0	0	0	0.858	0.9	0.988	0.999
HDAC1	HDAC2	9606.ENSP00000362649	9606.ENSP00000430432	0	0	0.449	0.983	0.111	0.992	0.9	0.99	0.999
HDAC2	CBX5	9606.ENSP00000430432	9606.ENSP00000209875	0	0	0	0	0.268	0.287	0	0.399	0.659
HDAC2	PSMA3	9606.ENSP00000430432	9606.ENSP00000216455	0	0	0	0	0.186	0.282	0	0.069	0.409
HDAC2	NFKB1	9606.ENSP00000430432	9606.ENSP00000226574	0	0	0	0	0.066	0.4	0.9	0.258	0.952
HDAC2	MSH6	9606.ENSP00000430432	9606.ENSP00000234420	0.057	0	0	0	0.215	0.155	0	0.187	0.424
HDAC2	SMARCC1	9606.ENSP00000430432	9606.ENSP00000254480	0	0	0	0	0.201	0.179	0	0.454	0.611
HDAC2	MAPK3	9606.ENSP00000430432	9606.ENSP00000263025	0	0	0	0	0.054	0.127	0	0.387	0.449
HDAC2	EP300	9606.ENSP00000430432	9606.ENSP00000263253	0	0	0	0	0.064	0.289	0.9	0.955	0.996
HDAC2	SMARCC2	9606.ENSP00000430432	9606.ENSP00000267064	0	0	0	0	0.151	0.318	0	0.391	0.617
HDAC2	PML	9606.ENSP00000430432	9606.ENSP00000268058	0	0	0	0	0.062	0.839	0.9	0.171	0.985
HDAC2	RANBP2	9606.ENSP00000430432	9606.ENSP00000283195	0	0	0	0	0.13	0.244	0	0.195	0.425
HDAC2	NPM1	9606.ENSP00000430432	9606.ENSP00000296930	0	0	0	0	0.171	0.289	0	0.459	0.653
HDAC2	PA2G4	9606.ENSP00000430432	9606.ENSP00000302886	0	0	0	0	0.097	0.192	0	0.732	0.788
HDAC2	HCFC1	9606.ENSP00000430432	9606.ENSP00000309555	0	0	0	0	0.098	0.27	0	0.173	0.408
HDAC2	IKZF1	9606.ENSP00000430432	9606.ENSP00000331614	0	0	0	0	0	0.875	0	0.295	0.908
HDAC2	HSP90AA1	9606.ENSP00000430432	9606.ENSP00000335153	0	0	0	0	0.147	0.095	0	0.555	0.626
HDAC2	CBX3	9606.ENSP00000430432	9606.ENSP00000336687	0	0	0	0	0.149	0.287	0.65	0.447	0.867
HDAC2	RERE	9606.ENSP00000430432	9606.ENSP00000338629	0	0	0	0	0	0.645	0	0.51	0.818
HDAC2	IKZF3	9606.ENSP00000430432	9606.ENSP00000344544	0	0	0	0	0	0.526	0	0.134	0.572
HDAC2	ATN1	9606.ENSP00000430432	9606.ENSP00000349076	0	0	0	0	0	0.157	0.5	0.267	0.664
HDAC2	CHD4	9606.ENSP00000430432	9606.ENSP00000349508	0	0	0	0	0.187	0.936	0.9	0.972	0.999
HDAC2	DNMT1	9606.ENSP00000430432	9606.ENSP00000352516	0	0	0	0	0.062	0.846	0.8	0.992	0.999
HDAC2	INPP5F	9606.ENSP00000430432	9606.ENSP00000354519	0	0	0	0	0.062	0	0	0.429	0.442
HDAC2	SMC3	9606.ENSP00000430432	9606.ENSP00000354720	0.045	0	0	0	0.188	0.7	0	0.483	0.864
HDAC2	SET	9606.ENSP00000430432	9606.ENSP00000361777	0	0	0	0	0.587	0	0	0.127	0.624
HDAC2	HDAC1	9606.ENSP00000430432	9606.ENSP00000362649	0	0	0.449	0.983	0.111	0.992	0.9	0.99	0.999
HDAC2	RBL1	9606.ENSP00000430432	9606.ENSP00000362768	0	0	0	0	0.064	0.428	0.9	0.269	0.955
HDAC2	FOXO1	9606.ENSP00000430432	9606.ENSP00000368880	0	0	0	0	0	0.142	0.6	0.484	0.807
HDAC2	CBX1	9606.ENSP00000430432	9606.ENSP00000377060	0	0	0	0	0.155	0.287	0	0.503	0.676
HDAC2	ING4	9606.ENSP00000430432	9606.ENSP00000380024	0	0	0	0	0.065	0.244	0	0.296	0.459
HDAC2	DEK	9606.ENSP00000430432	9606.ENSP00000380414	0	0	0	0	0.582	0.27	0	0.457	0.82
HDAC2	MECP2	9606.ENSP00000430432	9606.ENSP00000395535	0	0	0	0	0	0.179	0.9	0.985	0.998
HDAC2	HMGA1	9606.ENSP00000430432	9606.ENSP00000399888	0	0	0	0	0.234	0.273	0	0.084	0.446
HDAC2	AKT1	9606.ENSP00000430432	9606.ENSP00000451828	0	0	0	0	0	0.078	0	0.547	0.565
HDAC2	TLE3	9606.ENSP00000430432	9606.ENSP00000452871	0	0	0	0	0.073	0.344	0	0.603	0.737
HDAC2	MYC	9606.ENSP00000430432	9606.ENSP00000479618	0	0	0	0	0	0.462	0	0.57	0.759
HDAC2	HIST1H3A	9606.ENSP00000430432	9606.ENSP00000480826	0.044	0	0	0	0.049	0.733	0	0.206	0.781
HDAC2	GTF2I	9606.ENSP00000430432	9606.ENSP00000460070	0	0	0	0	0.066	0.659	0	0.44	0.806
HDGFRP3	DIDO1	9606.ENSP00000299633	9606.ENSP00000266070	0	0	0	0	0.47	0	0	0.092	0.498
HIST1H1A	HIST1H1D	9606.ENSP00000244573	9606.ENSP00000244534	0	0	0	0.952	0.237	0.678	0.3	0.936	0.821
HIST1H1A	CBX1	9606.ENSP00000244573	9606.ENSP00000377060	0	0	0	0	0	0.261	0	0.266	0.435
HIST1H1A	SET	9606.ENSP00000244573	9606.ENSP00000361777	0	0	0	0	0	0.486	0	0.086	0.51
HIST1H1A	EP300	9606.ENSP00000244573	9606.ENSP00000263253	0	0	0	0	0	0.498	0	0.136	0.548
HIST1H1A	HIST1H3A	9606.ENSP00000244573	9606.ENSP00000480826	0	0.001	0	0	0.133	0.151	0	0.457	0.566
HIST1H1A	HIST1H1E	9606.ENSP00000244573	9606.ENSP00000307705	0	0	0	0.961	0.238	0.646	0.3	0.828	0.801
HIST1H1A	HIST1H1C	9606.ENSP00000244573	9606.ENSP00000339566	0	0	0	0.954	0.171	0.678	0.3	0.931	0.805
HIST1H1A	HIST1H1B	9606.ENSP00000244573	9606.ENSP00000330074	0	0	0	0.95	0.276	0.678	0.3	0.99	0.831
HIST1H1B	CBX5	9606.ENSP00000330074	9606.ENSP00000209875	0	0	0	0	0.062	0.395	0	0.338	0.592
HIST1H1B	HIST1H1D	9606.ENSP00000330074	9606.ENSP00000244534	0	0	0	0.971	0.349	0.129	0.3	0.921	0.58
HIST1H1B	HIST1H1A	9606.ENSP00000330074	9606.ENSP00000244573	0	0	0	0.95	0.276	0.678	0.3	0.99	0.831
HIST1H1B	NPM1	9606.ENSP00000330074	9606.ENSP00000296930	0	0	0	0	0.062	0.421	0	0.133	0.488
HIST1H1B	HIST1H1E	9606.ENSP00000330074	9606.ENSP00000307705	0	0	0	0.976	0.35	0.129	0.3	0.855	0.578
HIST1H1B	HIST1H1C	9606.ENSP00000330074	9606.ENSP00000339566	0	0	0	0.97	0.139	0.129	0.3	0.963	0.445
HIST1H1B	DNMT1	9606.ENSP00000330074	9606.ENSP00000352516	0	0	0	0	0.063	0	0	0.454	0.467
HIST1H1B	RBM26	9606.ENSP00000330074	9606.ENSP00000483408	0	0	0	0	0	0	0	0.476	0.476
HIST1H1B	HMGA1	9606.ENSP00000330074	9606.ENSP00000399888	0	0	0	0	0.062	0.129	0	0.415	0.48
HIST1H1B	CBX3	9606.ENSP00000330074	9606.ENSP00000336687	0	0	0	0	0	0.158	0	0.561	0.615
HIST1H1B	HIST1H3A	9606.ENSP00000330074	9606.ENSP00000480826	0	0.002	0	0	0.248	0.325	0	0.479	0.713
HIST1H1C	CBX5	9606.ENSP00000339566	9606.ENSP00000209875	0	0	0	0	0	0.158	0	0.387	0.461
HIST1H1C	HIST1H1D	9606.ENSP00000339566	9606.ENSP00000244534	0	0	0	0.975	0.249	0.129	0.3	0.946	0.514
HIST1H1C	HIST1H1A	9606.ENSP00000339566	9606.ENSP00000244573	0	0	0	0.954	0.171	0.678	0.3	0.931	0.805
HIST1H1C	NPM1	9606.ENSP00000339566	9606.ENSP00000296930	0	0	0	0	0.083	0.481	0	0.234	0.604
HIST1H1C	HIST1H1E	9606.ENSP00000339566	9606.ENSP00000307705	0	0	0	0.979	0.348	0.129	0.3	0.907	0.576
HIST1H1C	HIST1H1B	9606.ENSP00000339566	9606.ENSP00000330074	0	0	0	0.97	0.139	0.129	0.3	0.963	0.445
HIST1H1C	MYC	9606.ENSP00000339566	9606.ENSP00000479618	0	0	0	0	0	0.146	0	0.325	0.4
HIST1H1C	CBX1	9606.ENSP00000339566	9606.ENSP00000377060	0	0	0	0	0	0.185	0	0.311	0.414
HIST1H1C	HIST1H3A	9606.ENSP00000339566	9606.ENSP00000480826	0	0.001	0	0	0.132	0.325	0	0.406	0.621
HIST1H1C	DNMT1	9606.ENSP00000339566	9606.ENSP00000352516	0	0	0	0	0.056	0	0	0.644	0.65
HIST1H1D	CBX5	9606.ENSP00000244534	9606.ENSP00000209875	0	0	0	0	0	0.158	0	0.451	0.518
HIST1H1D	HMGN1	9606.ENSP00000244534	9606.ENSP00000370125	0	0	0	0	0.101	0	0	0.418	0.454
HIST1H1D	HIST1H1C	9606.ENSP00000244534	9606.ENSP00000339566	0	0	0	0.975	0.249	0.129	0.3	0.946	0.514
HIST1H1D	HIST1H1B	9606.ENSP00000244534	9606.ENSP00000330074	0	0	0	0.971	0.349	0.129	0.3	0.921	0.58
HIST1H1D	HIST1H3A	9606.ENSP00000244534	9606.ENSP00000480826	0	0.001	0	0	0.195	0.11	0	0.463	0.582
HIST1H1D	DNMT1	9606.ENSP00000244534	9606.ENSP00000352516	0	0	0	0	0.062	0	0	0.66	0.667
HIST1H1D	HIST1H1E	9606.ENSP00000244534	9606.ENSP00000307705	0	0	0	0.978	0.651	0.129	0.3	0.883	0.773
HIST1H1D	HIST1H1A	9606.ENSP00000244534	9606.ENSP00000244573	0	0	0	0.952	0.237	0.678	0.3	0.936	0.821
HIST1H1E	CBX5	9606.ENSP00000307705	9606.ENSP00000209875	0	0	0	0	0	0.359	0	0.579	0.719
HIST1H1E	HIST1H1D	9606.ENSP00000307705	9606.ENSP00000244534	0	0	0	0.978	0.651	0.129	0.3	0.883	0.773
HIST1H1E	HIST1H1A	9606.ENSP00000307705	9606.ENSP00000244573	0	0	0	0.961	0.238	0.646	0.3	0.828	0.801
HIST1H1E	SRSF1	9606.ENSP00000307705	9606.ENSP00000258962	0	0	0	0	0.085	0.444	0	0.096	0.501
HIST1H1E	EP300	9606.ENSP00000307705	9606.ENSP00000263253	0	0	0	0	0	0.06	0.9	0.225	0.92
HIST1H1E	HMGN1	9606.ENSP00000307705	9606.ENSP00000370125	0	0	0	0	0	0	0	0.42	0.42
HIST1H1E	HIST1H1C	9606.ENSP00000307705	9606.ENSP00000339566	0	0	0	0.979	0.348	0.129	0.3	0.907	0.576
HIST1H1E	HIST1H1B	9606.ENSP00000307705	9606.ENSP00000330074	0	0	0	0.976	0.35	0.129	0.3	0.855	0.578
HIST1H1E	CBX1	9606.ENSP00000307705	9606.ENSP00000377060	0	0	0	0	0.059	0.463	0	0.453	0.7
HIST1H1E	HIST1H3A	9606.ENSP00000307705	9606.ENSP00000480826	0	0.002	0	0	0.253	0.858	0.36	0.415	0.955
HIST1H1E	CBX3	9606.ENSP00000307705	9606.ENSP00000336687	0	0	0	0	0.053	0.971	0	0.322	0.98
HIST1H3A	CBX5	9606.ENSP00000480826	9606.ENSP00000209875	0	0	0	0	0.048	0.955	0	0.322	0.968
HIST1H3A	MSH6	9606.ENSP00000480826	9606.ENSP00000234420	0	0	0	0	0.062	0.333	0	0.189	0.449
HIST1H3A	HIST1H1D	9606.ENSP00000480826	9606.ENSP00000244534	0	0.001	0	0	0.195	0.11	0	0.463	0.582
HIST1H3A	HIST1H1A	9606.ENSP00000480826	9606.ENSP00000244573	0	0.001	0	0	0.133	0.151	0	0.457	0.566
HIST1H3A	EP300	9606.ENSP00000480826	9606.ENSP00000263253	0	0	0	0	0	0.925	0	0.238	0.94
HIST1H3A	DIDO1	9606.ENSP00000480826	9606.ENSP00000266070	0	0	0	0	0	0.874	0	0.141	0.887
HIST1H3A	NPM1	9606.ENSP00000480826	9606.ENSP00000296930	0	0	0	0	0	0.825	0	0.168	0.848
HIST1H3A	HIST1H1E	9606.ENSP00000480826	9606.ENSP00000307705	0	0.002	0	0	0.253	0.858	0.36	0.415	0.955
HIST1H3A	HIST1H1B	9606.ENSP00000480826	9606.ENSP00000330074	0	0.002	0	0	0.248	0.325	0	0.479	0.713
HIST1H3A	CBX3	9606.ENSP00000480826	9606.ENSP00000336687	0	0	0	0	0.048	0.967	0	0.147	0.971
HIST1H3A	HIST1H1C	9606.ENSP00000480826	9606.ENSP00000339566	0	0.001	0	0	0.132	0.325	0	0.406	0.621
HIST1H3A	SP100	9606.ENSP00000480826	9606.ENSP00000343023	0	0	0	0	0	0.821	0	0.043	0.821
HIST1H3A	CHD4	9606.ENSP00000480826	9606.ENSP00000349508	0	0	0	0	0	0.963	0	0.157	0.968
HIST1H3A	DNMT1	9606.ENSP00000480826	9606.ENSP00000352516	0	0	0	0	0.053	0.221	0	0.296	0.436
HIST1H3A	SET	9606.ENSP00000480826	9606.ENSP00000361777	0	0	0	0	0.062	0.721	0	0.134	0.754
HIST1H3A	HDAC1	9606.ENSP00000480826	9606.ENSP00000362649	0.044	0	0	0	0.049	0.685	0	0.268	0.763
HIST1H3A	TP53BP1	9606.ENSP00000480826	9606.ENSP00000371475	0	0	0	0	0	0.69	0	0.163	0.73
HIST1H3A	CBX1	9606.ENSP00000480826	9606.ENSP00000377060	0	0	0	0	0.053	0.967	0	0.207	0.974
HIST1H3A	ING4	9606.ENSP00000480826	9606.ENSP00000380024	0	0	0	0	0.062	0.944	0	0.107	0.95
HIST1H3A	ANP32A	9606.ENSP00000480826	9606.ENSP00000417864	0	0	0	0	0.064	0.486	0	0	0.498
HIST1H3A	HDAC2	9606.ENSP00000480826	9606.ENSP00000430432	0.044	0	0	0	0.049	0.733	0	0.206	0.781
HMGA1	NPM1	9606.ENSP00000399888	9606.ENSP00000296930	0	0	0	0	0.108	0.486	0	0.344	0.673
HMGA1	HIST1H1B	9606.ENSP00000399888	9606.ENSP00000330074	0	0	0	0	0.062	0.129	0	0.415	0.48
HMGA1	LBR	9606.ENSP00000399888	9606.ENSP00000339883	0	0	0	0	0.069	0	0	0.499	0.513
HMGA1	TCEAL3	9606.ENSP00000399888	9606.ENSP00000361711	0	0	0	0	0	0	0	0.668	0.668
HMGA1	HDAC2	9606.ENSP00000399888	9606.ENSP00000430432	0	0	0	0	0.234	0.273	0	0.084	0.446
HMGN1	HIST1H1D	9606.ENSP00000370125	9606.ENSP00000244534	0	0	0	0	0.101	0	0	0.418	0.454
HMGN1	EP300	9606.ENSP00000370125	9606.ENSP00000263253	0	0	0	0	0	0.27	0.8	0.381	0.901
HMGN1	HIST1H1E	9606.ENSP00000370125	9606.ENSP00000307705	0	0	0	0	0	0	0	0.42	0.42
HMGN1	USP7	9606.ENSP00000370125	9606.ENSP00000343535	0	0	0	0	0	0	0.6	0.31	0.712
HMGN1	POLR2A	9606.ENSP00000370125	9606.ENSP00000480158	0	0	0	0	0.055	0.27	0.6	0.155	0.735
HMGN3	CBX3	9606.ENSP00000482613	9606.ENSP00000336687	0	0	0	0	0.062	0	0	0.495	0.506
HNRNPA1	PSMA3	9606.ENSP00000341826	9606.ENSP00000216455	0	0	0	0	0.463	0.494	0	0.063	0.723
HNRNPA1	SRSF1	9606.ENSP00000341826	9606.ENSP00000258962	0	0	0.297	0	0.953	0.347	0	0.839	0.996
HNRNPA1	RBM25	9606.ENSP00000341826	9606.ENSP00000261973	0	0	0	0	0.152	0.403	0	0.44	0.692
HNRNPA1	ACIN1	9606.ENSP00000341826	9606.ENSP00000262710	0	0	0	0	0.237	0.206	0	0.172	0.455
HNRNPA1	RPS3	9606.ENSP00000341826	9606.ENSP00000278572	0	0	0	0	0.463	0.302	0	0.111	0.638
HNRNPA1	HNRNPU	9606.ENSP00000341826	9606.ENSP00000283179	0	0	0	0	0.859	0.532	0.8	0.772	0.996
HNRNPA1	NPM1	9606.ENSP00000341826	9606.ENSP00000296930	0	0	0	0	0.4	0.343	0	0.31	0.704
HNRNPA1	SLU7	9606.ENSP00000341826	9606.ENSP00000297151	0	0	0	0	0.064	0.231	0	0.361	0.5
HNRNPA1	SRRM2	9606.ENSP00000341826	9606.ENSP00000301740	0	0	0	0	0.091	0.359	0	0.303	0.559
HNRNPA1	HNRNPUL2	9606.ENSP00000341826	9606.ENSP00000301785	0	0	0	0	0.115	0.496	0	0.208	0.616
HNRNPA1	PA2G4	9606.ENSP00000341826	9606.ENSP00000302886	0	0	0	0	0.477	0.058	0	0.186	0.565
HNRNPA1	HSP90AA1	9606.ENSP00000341826	9606.ENSP00000335153	0	0	0	0	0.348	0.271	0	0.275	0.626
HNRNPA1	CBX3	9606.ENSP00000341826	9606.ENSP00000336687	0	0	0	0	0.361	0.13	0	0.222	0.53
HNRNPA1	EIF4G2	9606.ENSP00000341826	9606.ENSP00000433664	0	0	0	0	0.138	0.142	0	0.254	0.401
HNRNPA1	PRPF40A	9606.ENSP00000341826	9606.ENSP00000386458	0	0	0	0	0.214	0.172	0	0.155	0.402
HNRNPA1	ANP32A	9606.ENSP00000341826	9606.ENSP00000417864	0	0	0	0	0.315	0	0	0.165	0.403
HNRNPA1	TAGLN2	9606.ENSP00000341826	9606.ENSP00000357076	0	0	0	0	0	0.216	0	0.275	0.408
HNRNPA1	CBX1	9606.ENSP00000341826	9606.ENSP00000377060	0	0	0	0	0.174	0.183	0	0.205	0.417
HNRNPA1	DKC1	9606.ENSP00000341826	9606.ENSP00000358563	0	0	0	0	0.231	0.092	0	0.284	0.457
HNRNPA1	TP53BP1	9606.ENSP00000341826	9606.ENSP00000371475	0	0	0	0	0	0.405	0	0.134	0.462
HNRNPA1	HNRNPUL1	9606.ENSP00000341826	9606.ENSP00000375863	0	0	0	0	0.203	0.155	0	0.275	0.47
HNRNPA1	AKT1	9606.ENSP00000341826	9606.ENSP00000451828	0	0	0	0	0	0.078	0	0.469	0.489
HNRNPA1	CHD4	9606.ENSP00000341826	9606.ENSP00000349508	0	0	0	0	0.292	0.321	0	0.088	0.523
HNRNPA1	EIF3B	9606.ENSP00000341826	9606.ENSP00000354125	0	0	0	0	0.321	0.056	0	0.333	0.535
HNRNPA1	XRN2	9606.ENSP00000341826	9606.ENSP00000366396	0	0	0	0	0.106	0.275	0	0.339	0.535
HNRNPA1	CSTF2	9606.ENSP00000341826	9606.ENSP00000362063	0	0	0	0	0.123	0.182	0	0.41	0.539
HNRNPA1	HSP90AB1	9606.ENSP00000341826	9606.ENSP00000360609	0	0	0	0	0.369	0.263	0	0.155	0.573
HNRNPA1	MYC	9606.ENSP00000341826	9606.ENSP00000479618	0	0	0	0	0.09	0.086	0	0.534	0.579
HNRNPA1	RPLP0	9606.ENSP00000341826	9606.ENSP00000449328	0	0	0	0	0.497	0.078	0	0.171	0.583
HNRNPA1	SRSF2	9606.ENSP00000341826	9606.ENSP00000376276	0	0	0.352	0.637	0.275	0.168	0	0.735	0.591
HNRNPA1	SET	9606.ENSP00000341826	9606.ENSP00000361777	0	0	0	0	0.446	0.227	0	0.147	0.603
HNRNPA1	SERBP1	9606.ENSP00000341826	9606.ENSP00000360034	0	0	0	0	0.277	0.281	0	0.418	0.671
HNRNPA1	POLR2A	9606.ENSP00000341826	9606.ENSP00000480158	0	0	0	0	0.069	0.149	0.6	0.162	0.699
HNRNPA1	HNRNPA3	9606.ENSP00000341826	9606.ENSP00000376309	0	0	0.429	0.972	0.738	0.282	0.8	0.739	0.96
HNRNPA1	HNRNPK	9606.ENSP00000341826	9606.ENSP00000365439	0	0	0	0	0.957	0.747	0.8	0.813	0.999
HNRNPA1	HNRNPH1	9606.ENSP00000341826	9606.ENSP00000349168	0	0	0	0	0.955	0.91	0.8	0.873	0.999
HNRNPA3	PSMA3	9606.ENSP00000376309	9606.ENSP00000216455	0	0	0	0	0.301	0.282	0	0.143	0.532
HNRNPA3	SRSF1	9606.ENSP00000376309	9606.ENSP00000258962	0	0	0.257	0	0.665	0.368	0	0.409	0.894
HNRNPA3	RBM25	9606.ENSP00000376309	9606.ENSP00000261973	0	0	0	0	0.095	0.403	0	0.268	0.57
HNRNPA3	HNRNPU	9606.ENSP00000376309	9606.ENSP00000283179	0	0	0	0	0.42	0.431	0.8	0.564	0.967
HNRNPA3	SRRM2	9606.ENSP00000376309	9606.ENSP00000301740	0	0	0	0	0.108	0.325	0	0.192	0.472
HNRNPA3	CBX3	9606.ENSP00000376309	9606.ENSP00000336687	0	0	0	0	0.193	0.13	0	0.227	0.411
HNRNPA3	HNRNPA1	9606.ENSP00000376309	9606.ENSP00000341826	0	0	0.429	0.972	0.738	0.282	0.8	0.739	0.96
HNRNPA3	HNRNPH1	9606.ENSP00000376309	9606.ENSP00000349168	0	0	0	0	0.674	0.766	0.8	0.65	0.993
HNRNPA3	SET	9606.ENSP00000376309	9606.ENSP00000361777	0	0	0	0	0.264	0.227	0	0.056	0.416
HNRNPA3	HNRNPK	9606.ENSP00000376309	9606.ENSP00000365439	0	0	0	0	0.683	0.427	0.8	0.551	0.981
HNRNPA3	XRN2	9606.ENSP00000376309	9606.ENSP00000366396	0	0	0	0	0.064	0.328	0	0.142	0.413
HNRNPA3	HNRNPUL1	9606.ENSP00000376309	9606.ENSP00000375863	0	0	0	0	0.319	0.124	0	0.274	0.529
HNRNPA3	SRSF2	9606.ENSP00000376309	9606.ENSP00000376276	0	0	0.341	0.64	0.183	0.168	0	0.465	0.471
HNRNPA3	2002-09-01	9606.ENSP00000376309	9606.ENSP00000479861	0	0	0	0	0.064	0.06	0	0.41	0.436
HNRNPA3	EIF4G2	9606.ENSP00000376309	9606.ENSP00000433664	0	0	0	0	0.12	0.142	0	0.448	0.547
HNRNPA3	POLR2A	9606.ENSP00000376309	9606.ENSP00000480158	0	0	0	0	0.063	0.149	0.6	0.112	0.678
HNRNPH1	PSMA3	9606.ENSP00000349168	9606.ENSP00000216455	0	0	0	0	0.427	0.056	0	0.093	0.466
HNRNPH1	CANX	9606.ENSP00000349168	9606.ENSP00000247461	0	0	0	0	0.084	0.27	0	0.205	0.421
HNRNPH1	SRSF1	9606.ENSP00000349168	9606.ENSP00000258962	0	0	0	0	0.96	0.441	0	0.692	0.992
HNRNPH1	RBM25	9606.ENSP00000349168	9606.ENSP00000261973	0	0	0	0	0.301	0.27	0	0.32	0.623
HNRNPH1	ACIN1	9606.ENSP00000349168	9606.ENSP00000262710	0	0	0	0	0.286	0.27	0	0.176	0.533
HNRNPH1	TMPO	9606.ENSP00000349168	9606.ENSP00000266732	0	0	0	0	0.138	0.27	0	0.364	0.564
HNRNPH1	HNRNPU	9606.ENSP00000349168	9606.ENSP00000283179	0	0	0	0	0.863	0.506	0.8	0.676	0.995
HNRNPH1	RAVER1	9606.ENSP00000349168	9606.ENSP00000293677	0	0	0	0	0.1	0.103	0	0.41	0.482
HNRNPH1	NPM1	9606.ENSP00000349168	9606.ENSP00000296930	0	0	0	0	0.184	0.343	0	0.257	0.567
HNRNPH1	SLU7	9606.ENSP00000349168	9606.ENSP00000297151	0	0	0	0	0.063	0	0	0.388	0.402
HNRNPH1	SRRM2	9606.ENSP00000349168	9606.ENSP00000301740	0	0	0	0	0.103	0.344	0	0.318	0.564
HNRNPH1	PA2G4	9606.ENSP00000349168	9606.ENSP00000302886	0	0	0	0	0.327	0	0	0.216	0.449
HNRNPH1	HNRNPA1	9606.ENSP00000349168	9606.ENSP00000341826	0	0	0	0	0.955	0.91	0.8	0.873	0.999
HNRNPH1	EIF3B	9606.ENSP00000349168	9606.ENSP00000354125	0	0	0	0	0.287	0	0	0.193	0.401
HNRNPH1	TCF20	9606.ENSP00000349168	9606.ENSP00000352463	0	0	0	0	0.088	0.27	0	0.173	0.401
HNRNPH1	HDAC1	9606.ENSP00000349168	9606.ENSP00000362649	0	0	0	0	0.386	0	0	0.095	0.421
HNRNPH1	API5	9606.ENSP00000349168	9606.ENSP00000431391	0	0	0	0	0.239	0.27	0	0.058	0.431
HNRNPH1	CHD4	9606.ENSP00000349168	9606.ENSP00000349508	0	0	0	0	0.288	0.27	0	0	0.458
HNRNPH1	SERBP1	9606.ENSP00000349168	9606.ENSP00000360034	0	0	0	0	0.234	0.27	0	0.112	0.46
HNRNPH1	ANP32A	9606.ENSP00000349168	9606.ENSP00000417864	0	0	0	0	0.271	0.27	0	0.079	0.467
HNRNPH1	NUCKS1	9606.ENSP00000349168	9606.ENSP00000356110	0	0	0	0	0.083	0.27	0	0.281	0.476
HNRNPH1	SET	9606.ENSP00000349168	9606.ENSP00000361777	0	0	0	0	0.428	0.27	0	0.093	0.588
HNRNPH1	CSTF2	9606.ENSP00000349168	9606.ENSP00000362063	0	0	0	0	0.111	0.077	0	0.571	0.618
HNRNPH1	POLR2A	9606.ENSP00000349168	9606.ENSP00000480158	0	0	0	0	0.078	0.159	0.6	0.101	0.684
HNRNPH1	HNRNPUL1	9606.ENSP00000349168	9606.ENSP00000375863	0	0	0	0	0.191	0.676	0	0.346	0.814
HNRNPH1	SRSF2	9606.ENSP00000349168	9606.ENSP00000376276	0	0	0	0	0.348	0.151	0	0.736	0.841
HNRNPH1	HNRNPA3	9606.ENSP00000349168	9606.ENSP00000376309	0	0	0	0	0.674	0.766	0.8	0.65	0.993
HNRNPH1	HNRNPK	9606.ENSP00000349168	9606.ENSP00000365439	0	0	0	0	0.981	0.691	0.8	0.671	0.999
HNRNPK	PSMA3	9606.ENSP00000365439	9606.ENSP00000216455	0	0	0	0	0.457	0.27	0	0.061	0.595
HNRNPK	TRIM28	9606.ENSP00000365439	9606.ENSP00000253024	0	0	0	0	0.144	0.281	0	0.225	0.482
HNRNPK	SRSF1	9606.ENSP00000365439	9606.ENSP00000258962	0	0	0	0	0.95	0.451	0	0.579	0.987
HNRNPK	KPNA3	9606.ENSP00000365439	9606.ENSP00000261667	0	0	0	0	0.065	0	0	0.72	0.727
HNRNPK	RBM25	9606.ENSP00000365439	9606.ENSP00000261973	0	0	0	0	0.186	0	0	0.354	0.452
HNRNPK	MAPK3	9606.ENSP00000365439	9606.ENSP00000263025	0	0	0	0	0.062	0.112	0	0.646	0.68
HNRNPK	RPS3	9606.ENSP00000365439	9606.ENSP00000278572	0	0	0	0	0.302	0.056	0	0.284	0.487
HNRNPK	HNRNPU	9606.ENSP00000365439	9606.ENSP00000283179	0	0	0	0	0.81	0.581	0.8	0.702	0.994
HNRNPK	NPM1	9606.ENSP00000365439	9606.ENSP00000296930	0	0	0	0	0.157	0.078	0	0.525	0.599
HNRNPK	SRRM2	9606.ENSP00000365439	9606.ENSP00000301740	0	0	0	0	0.081	0.423	0	0.139	0.503
HNRNPK	HNRNPUL2	9606.ENSP00000365439	9606.ENSP00000301785	0	0	0	0	0.094	0.167	0	0.311	0.435
HNRNPK	PA2G4	9606.ENSP00000365439	9606.ENSP00000302886	0	0	0	0	0.406	0.27	0	0.23	0.637
HNRNPK	SRRM1	9606.ENSP00000365439	9606.ENSP00000326261	0	0	0	0	0.142	0.348	0	0.311	0.581
HNRNPK	HSP90AA1	9606.ENSP00000365439	9606.ENSP00000335153	0	0	0	0	0.321	0.128	0	0.246	0.515
HNRNPK	CBX3	9606.ENSP00000365439	9606.ENSP00000336687	0	0	0	0	0.307	0	0	0.203	0.424
HNRNPK	YTHDC1	9606.ENSP00000365439	9606.ENSP00000339245	0	0	0	0	0.123	0.282	0	0.17	0.431
HNRNPK	HNRNPA1	9606.ENSP00000365439	9606.ENSP00000341826	0	0	0	0	0.957	0.747	0.8	0.813	0.999
HNRNPK	HNRNPH1	9606.ENSP00000365439	9606.ENSP00000349168	0	0	0	0	0.981	0.691	0.8	0.671	0.999
HNRNPK	CHD4	9606.ENSP00000365439	9606.ENSP00000349508	0	0	0	0	0.3	0.27	0	0.087	0.493
HNRNPK	HSP90AB1	9606.ENSP00000365439	9606.ENSP00000360609	0	0	0	0	0.305	0	0	0.211	0.428
HNRNPK	SET	9606.ENSP00000365439	9606.ENSP00000361777	0	0	0	0	0.396	0	0	0.168	0.476
HNRNPK	CSTF2	9606.ENSP00000365439	9606.ENSP00000362063	0	0	0	0	0.087	0.253	0	0.3	0.481
HNRNPK	HDAC1	9606.ENSP00000365439	9606.ENSP00000362649	0	0	0	0	0.331	0	0	0.201	0.443
HNRNPK	ABI1	9606.ENSP00000365439	9606.ENSP00000365312	0	0	0	0	0.112	0.104	0	0.937	0.946
HNRNPK	RPLP0	9606.ENSP00000365439	9606.ENSP00000449328	0	0	0	0	0.317	0.058	0	0.158	0.411
HNRNPK	ANP32A	9606.ENSP00000365439	9606.ENSP00000417864	0	0	0	0	0.302	0	0	0.203	0.42
HNRNPK	PRPF40A	9606.ENSP00000365439	9606.ENSP00000386458	0	0	0	0	0.286	0.166	0	0.113	0.426
HNRNPK	EEF1D	9606.ENSP00000365439	9606.ENSP00000410059	0	0	0	0	0.098	0.272	0	0.234	0.453
HNRNPK	2002-09-01	9606.ENSP00000365439	9606.ENSP00000479861	0	0	0	0	0.146	0.272	0	0.215	0.469
HNRNPK	API5	9606.ENSP00000365439	9606.ENSP00000431391	0	0	0	0	0.186	0.397	0	0.054	0.495
HNRNPK	XRN2	9606.ENSP00000365439	9606.ENSP00000366396	0	0	0	0	0.092	0.416	0	0.205	0.542
HNRNPK	EIF4G2	9606.ENSP00000365439	9606.ENSP00000433664	0	0	0	0	0.244	0	0	0.461	0.576
HNRNPK	HNRNPUL1	9606.ENSP00000365439	9606.ENSP00000375863	0	0	0	0	0.197	0.181	0	0.497	0.64
HNRNPK	SRSF2	9606.ENSP00000365439	9606.ENSP00000376276	0	0	0	0	0.275	0.07	0	0.564	0.68
HNRNPK	MYC	9606.ENSP00000365439	9606.ENSP00000479618	0	0	0	0	0.062	0.229	0	0.602	0.687
HNRNPK	POLR2A	9606.ENSP00000365439	9606.ENSP00000480158	0	0	0	0	0.079	0.27	0.6	0.122	0.732
HNRNPK	HNRNPA3	9606.ENSP00000365439	9606.ENSP00000376309	0	0	0	0	0.683	0.427	0.8	0.551	0.981
HNRNPU	PIAS1	9606.ENSP00000283179	9606.ENSP00000249636	0	0	0	0	0.085	0	0	0.719	0.732
HNRNPU	TRIM28	9606.ENSP00000283179	9606.ENSP00000253024	0	0	0	0	0.145	0.27	0	0.181	0.444
HNRNPU	SRSF1	9606.ENSP00000283179	9606.ENSP00000258962	0	0	0	0	0.764	0.221	0	0.51	0.902
HNRNPU	ACIN1	9606.ENSP00000283179	9606.ENSP00000262710	0	0	0	0	0.145	0	0	0.885	0.898
HNRNPU	EP300	9606.ENSP00000283179	9606.ENSP00000263253	0	0	0	0	0.062	0.27	0	0.82	0.866
HNRNPU	TMPO	9606.ENSP00000283179	9606.ENSP00000266732	0	0	0	0	0.176	0.27	0	0.145	0.44
HNRNPU	RPS3	9606.ENSP00000283179	9606.ENSP00000278572	0	0	0	0	0.156	0.276	0	0.156	0.44
HNRNPU	RPLP0	9606.ENSP00000283179	9606.ENSP00000449328	0	0	0	0	0.126	0.367	0	0.075	0.444
HNRNPU	HNRNPUL1	9606.ENSP00000283179	9606.ENSP00000375863	0	0	0	0.897	0.155	0.348	0	0.561	0.457
HNRNPU	DNMT1	9606.ENSP00000283179	9606.ENSP00000352516	0	0	0	0	0.127	0	0	0.413	0.466
HNRNPU	EIF4G2	9606.ENSP00000283179	9606.ENSP00000433664	0	0	0	0	0.131	0	0	0.42	0.475
HNRNPU	MARCKS	9606.ENSP00000283179	9606.ENSP00000478061	0	0	0	0	0	0.489	0	0.053	0.495
HNRNPU	CBX3	9606.ENSP00000283179	9606.ENSP00000336687	0	0	0	0	0.19	0	0	0.43	0.519
HNRNPU	CHD4	9606.ENSP00000283179	9606.ENSP00000349508	0	0	0	0	0.305	0.281	0	0.138	0.532
HNRNPU	LBR	9606.ENSP00000283179	9606.ENSP00000339883	0	0	0	0	0.096	0.128	0	0.472	0.548
HNRNPU	HDAC1	9606.ENSP00000283179	9606.ENSP00000362649	0	0	0	0	0.433	0	0	0.245	0.554
HNRNPU	THRAP3	9606.ENSP00000283179	9606.ENSP00000346634	0	0	0	0	0.264	0.259	0	0.256	0.559
HNRNPU	SRSF2	9606.ENSP00000283179	9606.ENSP00000376276	0	0	0	0	0.254	0	0	0.479	0.595
HNRNPU	MYC	9606.ENSP00000283179	9606.ENSP00000479618	0	0	0	0	0	0.279	0	0.493	0.619
HNRNPU	DKC1	9606.ENSP00000283179	9606.ENSP00000358563	0	0	0	0	0.184	0	0.72	0.048	0.763
HNRNPU	PTGES3	9606.ENSP00000283179	9606.ENSP00000482075	0	0	0	0	0.189	0	0.72	0	0.763
HNRNPU	NPM1	9606.ENSP00000283179	9606.ENSP00000296930	0	0	0	0	0.162	0.499	0	0.742	0.882
HNRNPU	POLR2A	9606.ENSP00000283179	9606.ENSP00000480158	0	0	0	0	0.076	0.85	0.6	0.057	0.94
HNRNPU	HNRNPA3	9606.ENSP00000283179	9606.ENSP00000376309	0	0	0	0	0.42	0.431	0.8	0.564	0.967
HNRNPU	HNRNPK	9606.ENSP00000283179	9606.ENSP00000365439	0	0	0	0	0.81	0.581	0.8	0.702	0.994
HNRNPU	HNRNPH1	9606.ENSP00000283179	9606.ENSP00000349168	0	0	0	0	0.863	0.506	0.8	0.676	0.995
HNRNPU	HNRNPA1	9606.ENSP00000283179	9606.ENSP00000341826	0	0	0	0	0.859	0.532	0.8	0.772	0.996
HNRNPUL1	ACIN1	9606.ENSP00000375863	9606.ENSP00000262710	0	0	0	0	0.129	0	0	0.531	0.575
HNRNPUL1	HNRNPU	9606.ENSP00000375863	9606.ENSP00000283179	0	0	0	0.897	0.155	0.348	0	0.561	0.457
HNRNPUL1	HNRNPUL2	9606.ENSP00000375863	9606.ENSP00000301785	0	0	0	0.886	0.101	0.65	0	0.146	0.676
HNRNPUL1	HNRNPA1	9606.ENSP00000375863	9606.ENSP00000341826	0	0	0	0	0.203	0.155	0	0.275	0.47
HNRNPUL1	HNRNPH1	9606.ENSP00000375863	9606.ENSP00000349168	0	0	0	0	0.191	0.676	0	0.346	0.814
HNRNPUL1	HNRNPK	9606.ENSP00000375863	9606.ENSP00000365439	0	0	0	0	0.197	0.181	0	0.497	0.64
HNRNPUL1	TP53BP1	9606.ENSP00000375863	9606.ENSP00000371475	0	0	0	0	0.046	0.302	0	0.216	0.433
HNRNPUL1	HNRNPA3	9606.ENSP00000375863	9606.ENSP00000376309	0	0	0	0	0.319	0.124	0	0.274	0.529
HNRNPUL2	ACIN1	9606.ENSP00000301785	9606.ENSP00000262710	0	0	0	0	0.108	0	0	0.433	0.473
HNRNPUL2	EPB41L3	9606.ENSP00000301785	9606.ENSP00000343158	0	0	0	0	0	0	0	0.423	0.423
HNRNPUL2	THRAP3	9606.ENSP00000301785	9606.ENSP00000346634	0	0	0	0	0.077	0	0	0.404	0.426
HNRNPUL2	HNRNPK	9606.ENSP00000301785	9606.ENSP00000365439	0	0	0	0	0.094	0.167	0	0.311	0.435
HNRNPUL2	CHD4	9606.ENSP00000301785	9606.ENSP00000349508	0	0	0	0	0.099	0.281	0	0.245	0.469
HNRNPUL2	HNRNPA1	9606.ENSP00000301785	9606.ENSP00000341826	0	0	0	0	0.115	0.496	0	0.208	0.616
HNRNPUL2	HNRNPUL1	9606.ENSP00000301785	9606.ENSP00000375863	0	0	0	0.886	0.101	0.65	0	0.146	0.676
HSP90AA1	MYH9	9606.ENSP00000335153	9606.ENSP00000216181	0	0	0	0	0.062	0.322	0	0.473	0.636
HSP90AA1	PSMA3	9606.ENSP00000335153	9606.ENSP00000216455	0	0	0	0	0.759	0.282	0	0.333	0.874
HSP90AA1	EIF5	9606.ENSP00000335153	9606.ENSP00000216554	0	0	0	0	0.363	0	0	0.152	0.437
HSP90AA1	STUB1	9606.ENSP00000335153	9606.ENSP00000219548	0	0	0	0	0.089	0.914	0.9	0.99	0.999
HSP90AA1	SGTA	9606.ENSP00000335153	9606.ENSP00000221566	0.047	0	0	0	0.127	0.661	0	0.907	0.97
HSP90AA1	MAPK14	9606.ENSP00000335153	9606.ENSP00000229795	0	0	0	0	0.054	0.288	0	0.49	0.627
HSP90AA1	CANX	9606.ENSP00000335153	9606.ENSP00000247461	0	0	0	0	0.215	0.284	0	0.735	0.838
HSP90AA1	HSPB1	9606.ENSP00000335153	9606.ENSP00000248553	0	0	0	0	0.065	0.347	0	0.949	0.966
HSP90AA1	SRSF1	9606.ENSP00000335153	9606.ENSP00000258962	0	0	0	0	0.323	0.368	0	0.252	0.652
HSP90AA1	PPIG	9606.ENSP00000335153	9606.ENSP00000260970	0	0	0	0	0.52	0.384	0	0.568	0.861
HSP90AA1	SLC9A3R1	9606.ENSP00000335153	9606.ENSP00000262613	0	0	0	0	0	0.061	0	0.469	0.48
HSP90AA1	MAPK3	9606.ENSP00000335153	9606.ENSP00000263025	0	0	0	0	0.054	0.299	0.9	0.866	0.99
HSP90AA1	EP300	9606.ENSP00000335153	9606.ENSP00000263253	0	0.005	0	0	0	0.285	0	0.475	0.609
HSP90AA1	SLC9A1	9606.ENSP00000335153	9606.ENSP00000263980	0	0	0	0	0	0.27	0	0.45	0.581
HSP90AA1	PXN	9606.ENSP00000335153	9606.ENSP00000267257	0	0	0	0	0	0	0.6	0.294	0.705
HSP90AA1	RPS3	9606.ENSP00000335153	9606.ENSP00000278572	0	0	0	0	0.305	0.281	0	0.913	0.953
HSP90AA1	RANBP2	9606.ENSP00000335153	9606.ENSP00000283195	0	0	0	0	0.123	0.248	0	0.267	0.474
HSP90AA1	NPM1	9606.ENSP00000335153	9606.ENSP00000296930	0	0	0	0	0.228	0.294	0	0.768	0.863
HSP90AA1	PA2G4	9606.ENSP00000335153	9606.ENSP00000302886	0	0	0	0	0.399	0.216	0	0.169	0.574
HSP90AA1	RAD9A	9606.ENSP00000335153	9606.ENSP00000311360	0	0	0	0	0	0	0.9	0.313	0.928
HSP90AA1	EML4	9606.ENSP00000335153	9606.ENSP00000320663	0	0	0	0	0	0	0	0.707	0.707
HSP90AA1	POLR2A	9606.ENSP00000335153	9606.ENSP00000480158	0	0	0	0	0.062	0.246	0	0.243	0.418
HSP90AA1	CDK11B	9606.ENSP00000335153	9606.ENSP00000464036	0	0	0	0	0.049	0.394	0	0.112	0.443
HSP90AA1	FLNA	9606.ENSP00000335153	9606.ENSP00000358866	0	0	0	0	0.052	0.126	0	0.398	0.458
HSP90AA1	UBA1	9606.ENSP00000335153	9606.ENSP00000338413	0	0	0	0	0.19	0.079	0	0.35	0.474
HSP90AA1	MYH11	9606.ENSP00000335153	9606.ENSP00000379616	0	0	0	0	0.062	0.305	0	0.29	0.497
HSP90AA1	NCOA3	9606.ENSP00000335153	9606.ENSP00000361066	0	0	0	0	0.063	0.078	0	0.476	0.507
HSP90AA1	SET	9606.ENSP00000335153	9606.ENSP00000361777	0	0	0	0	0.315	0.073	0	0.292	0.511
HSP90AA1	HNRNPK	9606.ENSP00000335153	9606.ENSP00000365439	0	0	0	0	0.321	0.128	0	0.246	0.515
HSP90AA1	CFL1	9606.ENSP00000335153	9606.ENSP00000432660	0	0	0	0	0.106	0	0	0.54	0.573
HSP90AA1	NELFE	9606.ENSP00000335153	9606.ENSP00000364578	0	0	0	0	0	0.246	0	0.466	0.58
HSP90AA1	MAPK8	9606.ENSP00000335153	9606.ENSP00000378974	0	0	0	0	0	0.27	0	0.449	0.58
HSP90AA1	EIF3B	9606.ENSP00000335153	9606.ENSP00000354125	0	0	0	0	0.53	0	0	0.146	0.582
HSP90AA1	FN1	9606.ENSP00000335153	9606.ENSP00000346839	0	0	0	0	0	0.074	0	0.578	0.592
HSP90AA1	RPLP0	9606.ENSP00000335153	9606.ENSP00000449328	0	0	0	0	0.292	0.264	0	0.299	0.604
HSP90AA1	HDAC2	9606.ENSP00000335153	9606.ENSP00000430432	0	0	0	0	0.147	0.095	0	0.555	0.626
HSP90AA1	HNRNPA1	9606.ENSP00000335153	9606.ENSP00000341826	0	0	0	0	0.348	0.271	0	0.275	0.626
HSP90AA1	SP100	9606.ENSP00000335153	9606.ENSP00000343023	0	0	0	0	0	0	0	0.707	0.707
HSP90AA1	ERBB2IP	9606.ENSP00000335153	9606.ENSP00000426632	0	0	0	0	0	0.281	0.6	0.103	0.719
HSP90AA1	HDAC1	9606.ENSP00000335153	9606.ENSP00000362649	0	0	0	0	0.072	0.059	0	0.76	0.773
HSP90AA1	PCNT	9606.ENSP00000335153	9606.ENSP00000352572	0	0	0	0	0.047	0	0.8	0.123	0.818
HSP90AA1	IRF3	9606.ENSP00000335153	9606.ENSP00000471896	0	0	0	0	0.065	0.494	0	0.715	0.853
HSP90AA1	DKC1	9606.ENSP00000335153	9606.ENSP00000358563	0	0	0	0	0.114	0.077	0.9	0.615	0.964
HSP90AA1	DNMT1	9606.ENSP00000335153	9606.ENSP00000352516	0.111	0	0	0	0.081	0	0	0.974	0.977
HSP90AA1	MYC	9606.ENSP00000335153	9606.ENSP00000479618	0	0	0	0	0.048	0.679	0	0.953	0.984
HSP90AA1	HSP90AB1	9606.ENSP00000335153	9606.ENSP00000360609	0	0	0.449	0.984	0.781	0.888	0.8	0.883	0.994
HSP90AA1	AKT1	9606.ENSP00000335153	9606.ENSP00000451828	0	0	0	0	0.062	0.946	0.9	0.991	0.999
HSP90AA1	PTGES3	9606.ENSP00000335153	9606.ENSP00000482075	0	0	0	0	0.65	0.98	0.9	0.994	0.999
HSP90AB1	MYH9	9606.ENSP00000360609	9606.ENSP00000216181	0	0	0	0	0.062	0.565	0	0.274	0.678
HSP90AB1	PSMA3	9606.ENSP00000360609	9606.ENSP00000216455	0	0	0	0	0.396	0.495	0	0.186	0.73
HSP90AB1	STUB1	9606.ENSP00000360609	9606.ENSP00000219548	0	0	0	0	0.082	0.684	0.54	0.736	0.96
HSP90AB1	SGTA	9606.ENSP00000360609	9606.ENSP00000221566	0.047	0	0	0	0.126	0.415	0	0.383	0.659
HSP90AB1	NFKB1	9606.ENSP00000360609	9606.ENSP00000226574	0	0	0	0	0.101	0.506	0	0.206	0.617
HSP90AB1	MAPK14	9606.ENSP00000360609	9606.ENSP00000229795	0	0	0	0	0.054	0.288	0	0.371	0.54
HSP90AB1	CANX	9606.ENSP00000360609	9606.ENSP00000247461	0	0	0	0	0.226	0.057	0	0.536	0.632
HSP90AB1	HSPB1	9606.ENSP00000360609	9606.ENSP00000248553	0	0	0	0	0.065	0.143	0	0.728	0.763
HSP90AB1	SRSF1	9606.ENSP00000360609	9606.ENSP00000258962	0	0	0	0	0.256	0.541	0	0.128	0.677
HSP90AB1	PPIG	9606.ENSP00000360609	9606.ENSP00000260970	0	0	0	0	0.506	0.384	0	0.348	0.784
HSP90AB1	MAPK3	9606.ENSP00000360609	9606.ENSP00000263025	0	0	0	0	0.054	0.299	0.9	0.374	0.953
HSP90AB1	RPS3	9606.ENSP00000360609	9606.ENSP00000278572	0	0	0	0	0.368	0.056	0	0.304	0.548
HSP90AB1	NPM1	9606.ENSP00000360609	9606.ENSP00000296930	0	0	0	0	0.206	0.294	0	0.302	0.574
HSP90AB1	PA2G4	9606.ENSP00000360609	9606.ENSP00000302886	0	0	0	0	0.377	0.216	0	0.214	0.583
HSP90AB1	EML4	9606.ENSP00000360609	9606.ENSP00000320663	0	0	0	0	0	0	0	0.546	0.546
HSP90AB1	HSP90AA1	9606.ENSP00000360609	9606.ENSP00000335153	0	0	0.449	0.984	0.781	0.888	0.8	0.883	0.994
HSP90AB1	HNRNPA1	9606.ENSP00000360609	9606.ENSP00000341826	0	0	0	0	0.369	0.263	0	0.155	0.573
HSP90AB1	RPLP1	9606.ENSP00000360609	9606.ENSP00000346037	0	0	0	0	0.168	0.244	0	0.232	0.474
HSP90AB1	PCNT	9606.ENSP00000360609	9606.ENSP00000352572	0	0	0	0	0.045	0	0.6	0	0.601
HSP90AB1	EIF3B	9606.ENSP00000360609	9606.ENSP00000354125	0	0	0	0	0.444	0	0	0.085	0.47
HSP90AB1	FLNA	9606.ENSP00000360609	9606.ENSP00000358866	0	0	0	0	0.052	0.683	0	0.257	0.757
HSP90AB1	HDAC1	9606.ENSP00000360609	9606.ENSP00000362649	0	0	0	0	0.079	0.059	0	0.373	0.409
HSP90AB1	HNRNPK	9606.ENSP00000360609	9606.ENSP00000365439	0	0	0	0	0.305	0	0	0.211	0.428
HSP90AB1	NELFE	9606.ENSP00000360609	9606.ENSP00000364578	0	0	0	0	0	0.426	0	0.048	0.43
HSP90AB1	MYC	9606.ENSP00000360609	9606.ENSP00000479618	0	0	0	0	0.062	0.103	0	0.485	0.528
HSP90AB1	RPLP0	9606.ENSP00000360609	9606.ENSP00000449328	0	0	0	0	0.353	0.264	0	0.417	0.698
HSP90AB1	AKT1	9606.ENSP00000360609	9606.ENSP00000451828	0	0	0	0	0.062	0.819	0.6	0.78	0.983
HSP90AB1	PTGES3	9606.ENSP00000360609	9606.ENSP00000482075	0	0	0	0	0.598	0.945	0.8	0.736	0.998
HSPB1	VCL	9606.ENSP00000248553	9606.ENSP00000211998	0	0	0	0	0.063	0.171	0	0.344	0.445
HSPB1	STUB1	9606.ENSP00000248553	9606.ENSP00000219548	0	0	0	0	0.089	0	0	0.427	0.456
HSPB1	MAPK14	9606.ENSP00000248553	9606.ENSP00000229795	0	0	0	0	0	0.363	0.9	0.794	0.985
HSPB1	NPM1	9606.ENSP00000248553	9606.ENSP00000296930	0	0	0	0	0	0.27	0	0.218	0.404
HSPB1	FN1	9606.ENSP00000248553	9606.ENSP00000346839	0	0	0	0	0.083	0.074	0	0.358	0.407
HSPB1	TAGLN2	9606.ENSP00000248553	9606.ENSP00000357076	0	0	0	0	0.064	0.06	0	0.402	0.428
HSPB1	EEF1D	9606.ENSP00000248553	9606.ENSP00000410059	0	0	0	0	0.081	0.272	0	0.243	0.449
HSPB1	SP100	9606.ENSP00000248553	9606.ENSP00000343023	0	0	0	0	0	0	0	0.459	0.459
HSPB1	CFL1	9606.ENSP00000248553	9606.ENSP00000432660	0	0	0	0	0.09	0	0	0.469	0.496
HSPB1	MAPK8	9606.ENSP00000248553	9606.ENSP00000378974	0	0	0	0	0	0.103	0	0.47	0.505
HSPB1	MAPK3	9606.ENSP00000248553	9606.ENSP00000263025	0	0	0	0	0	0.139	0	0.57	0.614
HSPB1	MYC	9606.ENSP00000248553	9606.ENSP00000479618	0	0	0	0	0	0.13	0	0.579	0.618
HSPB1	HSP90AB1	9606.ENSP00000248553	9606.ENSP00000360609	0	0	0	0	0.065	0.143	0	0.728	0.763
HSPB1	HSP90AA1	9606.ENSP00000248553	9606.ENSP00000335153	0	0	0	0	0.065	0.347	0	0.949	0.966
HSPB1	AKT1	9606.ENSP00000248553	9606.ENSP00000451828	0	0	0	0	0	0.76	0	0.982	0.995
HTATSF1	SRSF1	9606.ENSP00000442699	9606.ENSP00000258962	0	0	0	0	0.065	0.06	0	0.49	0.513
HTATSF1	IWS1	9606.ENSP00000442699	9606.ENSP00000295321	0	0	0	0	0.096	0	0	0.51	0.538
HTATSF1	SLU7	9606.ENSP00000442699	9606.ENSP00000297151	0	0	0	0	0.123	0.392	0	0.588	0.761
HTATSF1	SRRM1	9606.ENSP00000442699	9606.ENSP00000326261	0	0	0	0	0.147	0.271	0	0.297	0.525
HTATSF1	PRPF4B	9606.ENSP00000442699	9606.ENSP00000337194	0	0	0	0	0.062	0.388	0	0.242	0.526
HTATSF1	ANP32B	9606.ENSP00000442699	9606.ENSP00000345848	0	0	0	0	0.062	0	0	0.438	0.45
HTATSF1	AP3D1	9606.ENSP00000442699	9606.ENSP00000347416	0	0	0	0	0	0.271	0	0.653	0.736
HTATSF1	PPP1R11	9606.ENSP00000442699	9606.ENSP00000365963	0	0	0	0	0	0	0	0.652	0.652
HTATSF1	CCNK	9606.ENSP00000442699	9606.ENSP00000374529	0	0	0	0	0.069	0	0	0.491	0.506
HTATSF1	SRSF2	9606.ENSP00000442699	9606.ENSP00000376276	0	0	0	0	0.085	0.369	0	0.495	0.683
HTATSF1	PRPF40A	9606.ENSP00000442699	9606.ENSP00000386458	0	0	0	0	0.121	0	0	0.642	0.672
HTATSF1	POLR2A	9606.ENSP00000442699	9606.ENSP00000480158	0	0	0	0	0.059	0.462	0	0.59	0.774
IKZF1	DOCK2	9606.ENSP00000331614	9606.ENSP00000256935	0	0	0	0	0.681	0	0	0.117	0.706
IKZF1	BACH2	9606.ENSP00000331614	9606.ENSP00000257749	0	0	0	0	0.062	0.056	0	0.455	0.475
IKZF1	EP300	9606.ENSP00000331614	9606.ENSP00000263253	0	0	0	0	0.062	0.126	0	0.391	0.457
IKZF1	LY9	9606.ENSP00000331614	9606.ENSP00000263285	0	0	0	0	0.581	0	0	0.135	0.622
IKZF1	IL16	9606.ENSP00000331614	9606.ENSP00000302935	0	0	0	0	0.398	0.056	0	0.096	0.441
IKZF1	MS4A1	9606.ENSP00000331614	9606.ENSP00000433277	0	0	0	0	0.358	0	0	0.123	0.413
IKZF1	BCL10	9606.ENSP00000331614	9606.ENSP00000359612	0	0	0	0	0	0	0	0.432	0.432
IKZF1	EVI2B	9606.ENSP00000331614	9606.ENSP00000333779	0	0	0	0	0.418	0	0	0.066	0.433
IKZF1	FOXO1	9606.ENSP00000331614	9606.ENSP00000368880	0	0	0	0	0	0.078	0	0.424	0.446
IKZF1	CBX3	9606.ENSP00000331614	9606.ENSP00000336687	0	0	0	0	0	0.078	0	0.436	0.458
IKZF1	NFATC2	9606.ENSP00000331614	9606.ENSP00000379330	0	0	0	0	0.114	0.142	0	0.354	0.466
IKZF1	MYC	9606.ENSP00000331614	9606.ENSP00000479618	0	0	0	0	0	0.058	0	0.51	0.518
IKZF1	SASH3	9606.ENSP00000331614	9606.ENSP00000349359	0	0	0	0	0.537	0.056	0	0.061	0.554
IKZF1	DOCK8	9606.ENSP00000331614	9606.ENSP00000394888	0	0	0	0	0.532	0	0	0.15	0.585
IKZF1	FYB	9606.ENSP00000331614	9606.ENSP00000427114	0	0	0	0	0.617	0	0	0	0.617
IKZF1	LCP1	9606.ENSP00000331614	9606.ENSP00000381581	0	0	0	0	0.446	0.056	0	0.34	0.625
IKZF1	ETV6	9606.ENSP00000331614	9606.ENSP00000379658	0	0	0	0	0.084	0.058	0	0.717	0.734
IKZF1	IKZF3	9606.ENSP00000331614	9606.ENSP00000344544	0	0	0	0.941	0.307	0.798	0	0.955	0.862
IKZF1	PTPRC	9606.ENSP00000331614	9606.ENSP00000411355	0	0	0	0	0.821	0.057	0	0.464	0.901
IKZF1	HDAC2	9606.ENSP00000331614	9606.ENSP00000430432	0	0	0	0	0	0.875	0	0.295	0.908
IKZF1	HDAC1	9606.ENSP00000331614	9606.ENSP00000362649	0	0	0	0	0	0.772	0	0.882	0.972
IKZF1	CHD4	9606.ENSP00000331614	9606.ENSP00000349508	0	0	0	0	0	0.87	0	0.969	0.995
IKZF3	MAPK3	9606.ENSP00000344544	9606.ENSP00000263025	0	0	0	0	0	0.133	0.9	0.068	0.912
IKZF3	TNFRSF13C	9606.ENSP00000344544	9606.ENSP00000291232	0	0	0	0	0.192	0	0	0.324	0.43
IKZF3	IKZF1	9606.ENSP00000344544	9606.ENSP00000331614	0	0	0	0.941	0.307	0.798	0	0.955	0.862
IKZF3	MYC	9606.ENSP00000344544	9606.ENSP00000479618	0	0	0	0	0	0.058	0	0.395	0.405
IKZF3	HDAC1	9606.ENSP00000344544	9606.ENSP00000362649	0	0	0	0	0	0.327	0	0.181	0.425
IKZF3	PTPRC	9606.ENSP00000344544	9606.ENSP00000411355	0	0	0	0	0.211	0.057	0	0.302	0.435
IKZF3	HDAC2	9606.ENSP00000344544	9606.ENSP00000430432	0	0	0	0	0	0.526	0	0.134	0.572
IKZF3	CHD4	9606.ENSP00000344544	9606.ENSP00000349508	0	0	0	0	0	0.52	0	0.663	0.831
IL16	IKZF1	9606.ENSP00000302935	9606.ENSP00000331614	0	0	0	0	0.398	0.056	0	0.096	0.441
IL16	PPP1R12A	9606.ENSP00000302935	9606.ENSP00000389168	0	0	0	0	0	0.285	0	0.294	0.473
IL16	PTPRC	9606.ENSP00000302935	9606.ENSP00000411355	0	0	0	0	0.464	0.066	0	0.235	0.584
ING4	TRIM28	9606.ENSP00000380024	9606.ENSP00000253024	0	0	0	0	0	0	0	0.451	0.451
ING4	EP300	9606.ENSP00000380024	9606.ENSP00000263253	0	0	0	0	0.067	0.317	0	0.922	0.946
ING4	TAF12	9606.ENSP00000380024	9606.ENSP00000263974	0	0	0	0	0	0	0	0.402	0.402
ING4	HDAC1	9606.ENSP00000380024	9606.ENSP00000362649	0	0	0	0	0.065	0.244	0	0.442	0.571
ING4	HDAC2	9606.ENSP00000380024	9606.ENSP00000430432	0	0	0	0	0.065	0.244	0	0.296	0.459
ING4	HIST1H3A	9606.ENSP00000380024	9606.ENSP00000480826	0	0	0	0	0.062	0.944	0	0.107	0.95
INPP5F	HDAC2	9606.ENSP00000354519	9606.ENSP00000430432	0	0	0	0	0.062	0	0	0.429	0.442
INPP5F	PI4K2A	9606.ENSP00000354519	9606.ENSP00000359665	0	0	0	0	0.063	0	0.8	0.249	0.847
IRF2BP1	IRF2BPL	9606.ENSP00000307265	9606.ENSP00000238647	0	0	0	0.917	0.047	0.786	0	0.747	0.8
IRF2BP1	VGLL4	9606.ENSP00000307265	9606.ENSP00000404251	0	0	0	0	0	0.69	0	0.277	0.766
IRF2BPL	VGLL4	9606.ENSP00000238647	9606.ENSP00000404251	0	0	0	0	0	0.723	0	0.126	0.747
IRF2BPL	IRF2BP1	9606.ENSP00000238647	9606.ENSP00000307265	0	0	0	0.917	0.047	0.786	0	0.747	0.8
IRF3	NFKB1	9606.ENSP00000471896	9606.ENSP00000226574	0	0	0	0	0.119	0	0	0.392	0.441
IRF3	PIAS1	9606.ENSP00000471896	9606.ENSP00000249636	0	0	0	0	0	0	0	0.521	0.521
IRF3	SMARCC1	9606.ENSP00000471896	9606.ENSP00000254480	0	0	0	0	0	0	0.9	0	0.9
IRF3	KPNA3	9606.ENSP00000471896	9606.ENSP00000261667	0	0	0	0	0	0	0	0.664	0.664
IRF3	MAPK3	9606.ENSP00000471896	9606.ENSP00000263025	0	0	0	0	0.065	0	0	0.39	0.405
IRF3	EP300	9606.ENSP00000471896	9606.ENSP00000263253	0	0	0	0	0	0.898	0.8	0.989	0.999
IRF3	SMARCC2	9606.ENSP00000471896	9606.ENSP00000267064	0	0	0	0	0.157	0	0.9	0	0.912
IRF3	HSP90AA1	9606.ENSP00000471896	9606.ENSP00000335153	0	0	0	0	0.065	0.494	0	0.715	0.853
IRF3	NCOA3	9606.ENSP00000471896	9606.ENSP00000361066	0	0	0	0	0.049	0	0	0.558	0.561
IRF3	LRRFIP1	9606.ENSP00000471896	9606.ENSP00000375857	0	0	0	0	0	0	0	0.517	0.517
IRF3	MAPK8	9606.ENSP00000471896	9606.ENSP00000378974	0	0	0	0	0.066	0.27	0	0.391	0.548
IRF3	AKT1	9606.ENSP00000471896	9606.ENSP00000451828	0	0	0	0	0.046	0.281	0	0.469	0.604
IRF3	MYC	9606.ENSP00000471896	9606.ENSP00000479618	0	0	0	0	0	0	0	0.456	0.456
IRF3	YAP1	9606.ENSP00000471896	9606.ENSP00000478927	0	0	0	0	0	0.27	0	0.451	0.582
IRF3	POLR2A	9606.ENSP00000471896	9606.ENSP00000480158	0	0	0	0	0.045	0.273	0.9	0.124	0.931
ITGA4	VASP	9606.ENSP00000380227	9606.ENSP00000245932	0	0	0	0	0	0.043	0.6	0.123	0.635
ITGA4	PXN	9606.ENSP00000380227	9606.ENSP00000267257	0	0	0	0	0.062	0.77	0.9	0.985	0.999
ITGA4	FN1	9606.ENSP00000380227	9606.ENSP00000346839	0	0	0	0	0.051	0.487	0.9	0.988	0.999
ITGA4	SASH1	9606.ENSP00000380227	9606.ENSP00000356437	0	0	0	0	0.062	0	0	0.433	0.445
ITGA4	FLNA	9606.ENSP00000380227	9606.ENSP00000358866	0	0	0	0	0.065	0.294	0.6	0.176	0.753
ITGA4	ABI1	9606.ENSP00000380227	9606.ENSP00000365312	0	0	0	0	0	0.334	0.9	0.09	0.934
ITGA4	PRKAR1A	9606.ENSP00000380227	9606.ENSP00000376475	0	0	0	0	0.062	0.213	0.9	0	0.919
ITGA4	PTPRC	9606.ENSP00000380227	9606.ENSP00000411355	0	0	0	0	0.2	0.119	0	0.692	0.764
ITSN1	PXN	9606.ENSP00000370719	9606.ENSP00000267257	0	0	0	0	0.146	0.235	0	0.221	0.446
ITSN1	NIPBL	9606.ENSP00000370719	9606.ENSP00000282516	0	0	0	0	0.424	0	0	0.191	0.514
ITSN1	WNK1	9606.ENSP00000370719	9606.ENSP00000341292	0	0	0	0	0.062	0	0	0.789	0.793
ITSN1	AP3D1	9606.ENSP00000370719	9606.ENSP00000347416	0	0	0	0	0.073	0.248	0	0.342	0.501
ITSN1	SON	9606.ENSP00000370719	9606.ENSP00000348984	0	0	0	0	0	0	0	0.508	0.508
ITSN1	SH3KBP1	9606.ENSP00000370719	9606.ENSP00000380921	0	0	0	0.584	0.062	0.34	0	0.564	0.501
ITSN1	DENND1B	9606.ENSP00000370719	9606.ENSP00000479816	0	0	0	0	0	0.24	0	0.396	0.522
ITSN1	FNBP1	9606.ENSP00000370719	9606.ENSP00000413625	0	0	0	0	0.062	0.293	0	0.354	0.534
ITSN1	RABEP1	9606.ENSP00000370719	9606.ENSP00000445408	0	0	0	0	0.052	0.192	0	0.47	0.559
ITSN1	AAK1	9606.ENSP00000370719	9606.ENSP00000386456	0	0	0	0	0.108	0.104	0.6	0.421	0.79
ITSN1	REPS1	9606.ENSP00000370719	9606.ENSP00000392065	0	0	0	0.55	0	0.27	0.6	0.88	0.815
IWS1	POGZ	9606.ENSP00000295321	9606.ENSP00000271715	0	0	0	0	0.144	0.068	0	0.409	0.487
IWS1	SRSF2	9606.ENSP00000295321	9606.ENSP00000376276	0	0	0	0	0.285	0	0	0.208	0.41
IWS1	SLU7	9606.ENSP00000295321	9606.ENSP00000297151	0	0	0	0	0.144	0	0	0.342	0.413
IWS1	MYC	9606.ENSP00000295321	9606.ENSP00000479618	0	0	0	0	0	0	0	0.428	0.428
IWS1	CHD4	9606.ENSP00000295321	9606.ENSP00000349508	0	0	0	0	0.125	0.388	0	0.059	0.453
IWS1	PRPF40A	9606.ENSP00000295321	9606.ENSP00000386458	0	0	0	0	0.406	0	0	0.253	0.537
IWS1	HTATSF1	9606.ENSP00000295321	9606.ENSP00000442699	0	0	0	0	0.096	0	0	0.51	0.538
IWS1	NELFE	9606.ENSP00000295321	9606.ENSP00000364578	0	0	0	0	0.088	0	0.6	0	0.619
IWS1	CCNK	9606.ENSP00000295321	9606.ENSP00000374529	0	0	0	0	0.19	0	0.6	0.217	0.724
IWS1	POLR2A	9606.ENSP00000295321	9606.ENSP00000480158	0	0	0	0	0.156	0.591	0.6	0.384	0.903
KPNA3	CBX5	9606.ENSP00000261667	9606.ENSP00000209875	0	0	0	0	0.062	0.561	0	0.141	0.616
KPNA3	NFKB1	9606.ENSP00000261667	9606.ENSP00000226574	0	0	0	0	0	0.296	0.8	0.114	0.864
KPNA3	CBX1	9606.ENSP00000261667	9606.ENSP00000377060	0	0	0	0	0.062	0.377	0	0.087	0.42
KPNA3	RANBP3	9606.ENSP00000261667	9606.ENSP00000341483	0	0	0	0	0.062	0.144	0	0.344	0.427
KPNA3	EIF4G2	9606.ENSP00000261667	9606.ENSP00000433664	0	0	0	0	0.103	0	0	0.456	0.491
KPNA3	RANBP2	9606.ENSP00000261667	9606.ENSP00000283195	0	0	0	0	0.127	0.253	0	0.367	0.551
KPNA3	IRF3	9606.ENSP00000261667	9606.ENSP00000471896	0	0	0	0	0	0	0	0.664	0.664
KPNA3	MECP2	9606.ENSP00000261667	9606.ENSP00000395535	0	0	0	0	0	0.446	0	0.472	0.695
KPNA3	HNRNPK	9606.ENSP00000261667	9606.ENSP00000365439	0	0	0	0	0.065	0	0	0.72	0.727
KRI1	FKBP15	9606.ENSP00000320917	9606.ENSP00000238256	0	0	0	0	0.824	0	0	0	0.824
KRI1	MPHOSPH10	9606.ENSP00000320917	9606.ENSP00000244230	0	0	0	0	0.871	0.623	0.54	0.113	0.977
KRI1	RBM25	9606.ENSP00000320917	9606.ENSP00000261973	0	0	0	0	0.144	0	0	0.456	0.515
KRI1	NSUN2	9606.ENSP00000320917	9606.ENSP00000264670	0	0	0	0	0.487	0.056	0	0.327	0.645
KRI1	SLU7	9606.ENSP00000320917	9606.ENSP00000297151	0	0	0	0	0.65	0	0	0.384	0.775
KRI1	PA2G4	9606.ENSP00000320917	9606.ENSP00000302886	0	0	0	0	0.443	0.056	0	0	0.451
KRI1	NUCKS1	9606.ENSP00000320917	9606.ENSP00000356110	0	0	0	0	0	0	0	0.43	0.43
KRI1	EIF3B	9606.ENSP00000320917	9606.ENSP00000354125	0	0	0	0	0.407	0	0	0.095	0.44
KRI1	PWP1	9606.ENSP00000320917	9606.ENSP00000387365	0	0	0	0	0.867	0	0	0	0.867
KRI1	DKC1	9606.ENSP00000320917	9606.ENSP00000358563	0	0	0	0	0.786	0.369	0	0.323	0.9
LAMTOR1	PRKAB1	9606.ENSP00000278671	9606.ENSP00000229328	0	0	0	0	0.219	0	0.9	0.128	0.926
LAMTOR1	TFEB	9606.ENSP00000278671	9606.ENSP00000351742	0	0	0	0	0.062	0	0	0.447	0.459
LAMTOR1	AKT1S1	9606.ENSP00000278671	9606.ENSP00000375711	0	0	0	0	0.063	0	0.6	0.418	0.763
LAMTOR1	AKT1	9606.ENSP00000278671	9606.ENSP00000451828	0	0	0	0	0.048	0	0.9	0.26	0.923
LBR	CBX5	9606.ENSP00000339883	9606.ENSP00000209875	0	0	0	0	0.064	0.345	0	0.888	0.926
LBR	TMPO	9606.ENSP00000339883	9606.ENSP00000266732	0	0	0	0	0.209	0	0	0.696	0.749
LBR	HNRNPU	9606.ENSP00000339883	9606.ENSP00000283179	0	0	0	0	0.096	0.128	0	0.472	0.548
LBR	RANBP2	9606.ENSP00000339883	9606.ENSP00000283195	0	0	0	0	0.063	0	0	0.468	0.48
LBR	CBX3	9606.ENSP00000339883	9606.ENSP00000336687	0	0	0	0	0.13	0.289	0	0.627	0.75
LBR	DNMT1	9606.ENSP00000339883	9606.ENSP00000352516	0	0	0	0	0.088	0	0	0.397	0.426
LBR	MYC	9606.ENSP00000339883	9606.ENSP00000479618	0	0	0	0	0.069	0.111	0	0.366	0.429
LBR	HMGA1	9606.ENSP00000339883	9606.ENSP00000399888	0	0	0	0	0.069	0	0	0.499	0.513
LBR	CBX1	9606.ENSP00000339883	9606.ENSP00000377060	0	0	0	0	0.074	0.289	0	0.644	0.745
LBR	MECP2	9606.ENSP00000339883	9606.ENSP00000395535	0	0	0	0	0	0.27	0.6	0.926	0.976
LCP1	MYH9	9606.ENSP00000381581	9606.ENSP00000216181	0	0	0	0	0.055	0.076	0	0.374	0.405
LCP1	NFKB1	9606.ENSP00000381581	9606.ENSP00000226574	0	0	0	0	0.107	0.139	0	0.365	0.469
LCP1	MAPK14	9606.ENSP00000381581	9606.ENSP00000229795	0	0	0	0	0.063	0.101	0	0.367	0.42
LCP1	DOCK2	9606.ENSP00000381581	9606.ENSP00000256935	0	0	0	0	0.569	0.066	0	0.1	0.606
LCP1	BIN2	9606.ENSP00000381581	9606.ENSP00000267012	0	0	0	0	0.39	0.144	0	0.232	0.563
LCP1	DBN1	9606.ENSP00000381581	9606.ENSP00000292385	0	0	0	0	0.085	0.368	0	0.326	0.576
LCP1	BIN1	9606.ENSP00000381581	9606.ENSP00000316779	0	0	0	0	0.137	0.144	0	0.285	0.425
LCP1	FMNL1	9606.ENSP00000381581	9606.ENSP00000329219	0	0	0	0	0.157	0.24	0	0.312	0.521
LCP1	IKZF1	9606.ENSP00000381581	9606.ENSP00000331614	0	0	0	0	0.446	0.056	0	0.34	0.625
LCP1	EVI2B	9606.ENSP00000381581	9606.ENSP00000333779	0	0	0	0	0.523	0	0	0	0.523
LCP1	TAGLN2	9606.ENSP00000381581	9606.ENSP00000357076	0	0	0	0	0.087	0.313	0	0.354	0.56
LCP1	FLI1	9606.ENSP00000381581	9606.ENSP00000433488	0	0	0	0	0.137	0	0	0.365	0.428
LCP1	AKT1	9606.ENSP00000381581	9606.ENSP00000451828	0	0	0	0	0	0.102	0	0.45	0.485
LCP1	FYB	9606.ENSP00000381581	9606.ENSP00000427114	0	0	0	0	0.392	0	0	0.275	0.54
LCP1	PTPRC	9606.ENSP00000381581	9606.ENSP00000411355	0	0	0	0	0.585	0.056	0	0.201	0.66
LCP1	CFL1	9606.ENSP00000381581	9606.ENSP00000432660	0	0	0	0	0.064	0.162	0	0.636	0.69
LCP1	DBNL	9606.ENSP00000381581	9606.ENSP00000417653	0	0	0	0	0.085	0.567	0	0.439	0.758
LIMCH1	VCL	9606.ENSP00000316891	9606.ENSP00000211998	0	0	0	0	0.084	0.141	0	0.411	0.496
LIMCH1	PXN	9606.ENSP00000316891	9606.ENSP00000267257	0	0	0	0	0	0.135	0	0.373	0.435
LIMCH1	NPM1	9606.ENSP00000316891	9606.ENSP00000296930	0	0	0	0	0	0.244	0	0.239	0.4
LIMCH1	ARHGAP27	9606.ENSP00000316891	9606.ENSP00000403323	0	0	0	0	0.062	0.265	0	0.298	0.473
LIMCH1	ZNF185	9606.ENSP00000316891	9606.ENSP00000440847	0	0	0	0	0	0	0	0.663	0.663
LIMD1	VASP	9606.ENSP00000273317	9606.ENSP00000245932	0	0	0	0	0	0.16	0	0.399	0.473
LIMD1	STK4	9606.ENSP00000273317	9606.ENSP00000361892	0	0	0	0	0.064	0.103	0	0.373	0.427
LIMD1	YAP1	9606.ENSP00000273317	9606.ENSP00000478927	0	0	0	0	0.045	0.177	0	0.514	0.584
LRRFIP1	EP300	9606.ENSP00000375857	9606.ENSP00000263253	0	0	0	0	0	0	0	0.562	0.562
LRRFIP1	DBN1	9606.ENSP00000375857	9606.ENSP00000292385	0	0	0	0	0	0.131	0	0.553	0.595
LRRFIP1	FGFR1OP	9606.ENSP00000375857	9606.ENSP00000355812	0	0	0	0	0	0	0.5	0.254	0.611
LRRFIP1	AGFG1	9606.ENSP00000375857	9606.ENSP00000387282	0	0	0	0	0.042	0	0	0.401	0.401
LRRFIP1	IRF3	9606.ENSP00000375857	9606.ENSP00000471896	0	0	0	0	0	0	0	0.517	0.517
LRRFIP1	MYO18A	9606.ENSP00000375857	9606.ENSP00000437073	0	0	0	0	0	0	0.5	0.298	0.634
LSP1	MAPK14	9606.ENSP00000371194	9606.ENSP00000229795	0	0	0	0	0	0	0.9	0.098	0.905
LSP1	FMNL1	9606.ENSP00000371194	9606.ENSP00000329219	0	0	0	0	0.178	0.27	0	0.113	0.421
LSP1	CAST	9606.ENSP00000371194	9606.ENSP00000379157	0	0	0	0	0	0	0	0.539	0.539
LSP1	PTPRC	9606.ENSP00000371194	9606.ENSP00000411355	0	0	0	0	0.483	0	0	0.224	0.582
LY9	DOCK8	9606.ENSP00000263285	9606.ENSP00000394888	0	0	0	0	0.553	0	0	0.048	0.556
LY9	FYB	9606.ENSP00000263285	9606.ENSP00000427114	0	0	0	0	0.568	0	0	0.1	0.595
LY9	IKZF1	9606.ENSP00000263285	9606.ENSP00000331614	0	0	0	0	0.581	0	0	0.135	0.622
LY9	PTPRC	9606.ENSP00000263285	9606.ENSP00000411355	0	0	0	0	0.683	0	0	0.408	0.804
MACF1	VCL	9606.ENSP00000354573	9606.ENSP00000211998	0	0	0	0	0.064	0.149	0	0.373	0.456
MACF1	ABLIM1	9606.ENSP00000354573	9606.ENSP00000277895	0	0	0	0	0.062	0.18	0	0.377	0.479
MACF1	MAP1B	9606.ENSP00000354573	9606.ENSP00000296755	0	0	0	0	0.062	0	0	0.421	0.433
MACF1	CDK5RAP2	9606.ENSP00000354573	9606.ENSP00000343818	0	0	0	0	0.064	0	0	0.422	0.435
MAP1B	PPP1R11	9606.ENSP00000296755	9606.ENSP00000365963	0	0	0	0	0	0	0	0.402	0.402
MAP1B	AKAP12	9606.ENSP00000296755	9606.ENSP00000384537	0	0	0	0	0.294	0	0	0.19	0.404
MAP1B	MACF1	9606.ENSP00000296755	9606.ENSP00000354573	0	0	0	0	0.062	0	0	0.421	0.433
MAP1B	MAPK8	9606.ENSP00000296755	9606.ENSP00000378974	0	0	0	0	0.083	0.213	0	0.315	0.463
MAP1B	UBA1	9606.ENSP00000296755	9606.ENSP00000338413	0	0	0	0	0.082	0	0	0.444	0.467
MAP1B	NES	9606.ENSP00000296755	9606.ENSP00000357206	0	0	0	0	0.215	0	0	0.391	0.501
MAP1B	CRTC2	9606.ENSP00000296755	9606.ENSP00000357622	0	0	0	0	0	0	0	0.509	0.509
MAP1B	STK4	9606.ENSP00000296755	9606.ENSP00000361892	0	0	0	0	0.146	0.69	0	0	0.724
MAP1B	ANP32A	9606.ENSP00000296755	9606.ENSP00000417864	0	0	0	0	0.062	0.298	0	0.888	0.92
MAP4K1	DOCK2	9606.ENSP00000465039	9606.ENSP00000256935	0	0	0	0	0.157	0	0	0.442	0.51
MAP4K1	PDCD4	9606.ENSP00000465039	9606.ENSP00000280154	0	0	0	0	0	0	0	0.425	0.425
MAP4K1	DBN1	9606.ENSP00000465039	9606.ENSP00000292385	0	0	0	0	0	0	0	0.627	0.627
MAP4K1	EVI2B	9606.ENSP00000465039	9606.ENSP00000333779	0	0	0	0	0.089	0	0	0.371	0.403
MAP4K1	BCKDK	9606.ENSP00000465039	9606.ENSP00000378405	0	0	0	0	0.052	0	0	0.587	0.592
MAP4K1	DOCK8	9606.ENSP00000465039	9606.ENSP00000394888	0	0	0	0	0.157	0	0	0.349	0.428
MAP4K1	DBNL	9606.ENSP00000465039	9606.ENSP00000417653	0	0	0	0	0	0.27	0.9	0.925	0.994
MAP4K1	FYB	9606.ENSP00000465039	9606.ENSP00000427114	0	0	0	0	0.096	0	0	0.39	0.425
MAP4K4	NRBP1	9606.ENSP00000343658	9606.ENSP00000233557	0	0	0	0	0	0.142	0	0.344	0.413
MAP4K4	SLC9A1	9606.ENSP00000343658	9606.ENSP00000263980	0	0	0	0	0	0.311	0	0.478	0.625
MAP4K4	STRIP1	9606.ENSP00000343658	9606.ENSP00000358810	0	0	0	0	0	0.062	0	0.493	0.504
MAP4K4	MINK1	9606.ENSP00000343658	9606.ENSP00000347427	0	0	0	0.963	0	0.153	0.9	0.601	0.913
MAP4K4	TNIK	9606.ENSP00000343658	9606.ENSP00000399511	0	0	0	0.969	0.273	0.103	0.9	0.681	0.93
MAPK14	CDK13	9606.ENSP00000229795	9606.ENSP00000181839	0	0	0	0.756	0.062	0.376	0	0.136	0.405
MAPK14	NFKB1	9606.ENSP00000229795	9606.ENSP00000226574	0	0	0	0	0.065	0.134	0.9	0.463	0.95
MAPK14	PXN	9606.ENSP00000229795	9606.ENSP00000267257	0	0	0	0	0	0.058	0	0.394	0.405
MAPK14	LCP1	9606.ENSP00000229795	9606.ENSP00000381581	0	0	0	0	0.063	0.101	0	0.367	0.42
MAPK14	HDAC1	9606.ENSP00000229795	9606.ENSP00000362649	0	0	0	0	0	0.299	0	0.236	0.442
MAPK14	HSP90AB1	9606.ENSP00000229795	9606.ENSP00000360609	0	0	0	0	0.054	0.288	0	0.371	0.54
MAPK14	FN1	9606.ENSP00000229795	9606.ENSP00000346839	0	0	0	0	0	0	0	0.551	0.551
MAPK14	PTPRC	9606.ENSP00000229795	9606.ENSP00000411355	0	0	0	0	0.059	0.379	0	0.333	0.576
MAPK14	FLNA	9606.ENSP00000229795	9606.ENSP00000358866	0	0	0	0	0.079	0.302	0	0.459	0.622
MAPK14	AKAP13	9606.ENSP00000229795	9606.ENSP00000354718	0	0	0	0	0	0.101	0	0.598	0.623
MAPK14	HSP90AA1	9606.ENSP00000229795	9606.ENSP00000335153	0	0	0	0	0.054	0.288	0	0.49	0.627
MAPK14	BCL10	9606.ENSP00000229795	9606.ENSP00000359612	0	0	0	0	0	0	0.6	0.196	0.664
MAPK14	BNIP2	9606.ENSP00000229795	9606.ENSP00000267859	0	0	0	0	0	0	0.6	0.245	0.685
MAPK14	FOXO1	9606.ENSP00000229795	9606.ENSP00000368880	0	0	0	0	0	0.057	0.6	0.411	0.758
MAPK14	MAPK8	9606.ENSP00000229795	9606.ENSP00000378974	0	0	0.396	0.924	0.066	0.47	0.6	0.814	0.803
MAPK14	LSP1	9606.ENSP00000229795	9606.ENSP00000371194	0	0	0	0	0	0	0.9	0.098	0.905
MAPK14	NFATC2	9606.ENSP00000229795	9606.ENSP00000379330	0	0	0	0	0	0	0.9	0.224	0.919
MAPK14	SPAG9	9606.ENSP00000229795	9606.ENSP00000262013	0	0	0	0	0	0.329	0.6	0.77	0.933
MAPK14	SLC9A1	9606.ENSP00000229795	9606.ENSP00000263980	0	0	0	0	0	0.267	0.9	0.205	0.936
MAPK14	MYC	9606.ENSP00000229795	9606.ENSP00000479618	0	0	0	0	0	0.129	0.9	0.52	0.954
MAPK14	AKT1	9606.ENSP00000229795	9606.ENSP00000451828	0	0	0.303	0.623	0.083	0.83	0.6	0.769	0.956
MAPK14	MAPK3	9606.ENSP00000229795	9606.ENSP00000263025	0	0	0.394	0.924	0.048	0.777	0.8	0.831	0.957
MAPK14	MEF2C	9606.ENSP00000229795	9606.ENSP00000340874	0	0	0	0	0.066	0.502	0.9	0.338	0.965
MAPK14	EP300	9606.ENSP00000229795	9606.ENSP00000263253	0	0	0	0	0	0.525	0.9	0.323	0.965
MAPK14	NCOA3	9606.ENSP00000229795	9606.ENSP00000361066	0	0	0	0	0	0.679	0.9	0.113	0.969
MAPK14	HSPB1	9606.ENSP00000229795	9606.ENSP00000248553	0	0	0	0	0	0.363	0.9	0.794	0.985
MAPK3	VCL	9606.ENSP00000263025	9606.ENSP00000211998	0	0	0	0	0	0.14	0.6	0.596	0.849
MAPK3	STUB1	9606.ENSP00000263025	9606.ENSP00000219548	0	0	0	0	0.086	0.295	0	0.385	0.57
MAPK3	NFKB1	9606.ENSP00000263025	9606.ENSP00000226574	0	0	0	0	0	0.134	0.9	0.402	0.943
MAPK3	MAPK14	9606.ENSP00000263025	9606.ENSP00000229795	0	0	0.394	0.924	0.048	0.777	0.8	0.831	0.957
MAPK3	CANX	9606.ENSP00000263025	9606.ENSP00000247461	0	0	0	0	0.091	0.08	0	0.346	0.406
MAPK3	HSPB1	9606.ENSP00000263025	9606.ENSP00000248553	0	0	0	0	0	0.139	0	0.57	0.614
MAPK3	TRIM28	9606.ENSP00000263025	9606.ENSP00000253024	0	0	0	0	0.062	0	0	0.444	0.456
MAPK3	CIC	9606.ENSP00000263025	9606.ENSP00000458663	0	0	0	0	0.066	0.316	0	0.139	0.401
MAPK3	IRF3	9606.ENSP00000263025	9606.ENSP00000471896	0	0	0	0	0.065	0	0	0.39	0.405
MAPK3	NES	9606.ENSP00000263025	9606.ENSP00000357206	0	0	0	0	0	0	0	0.424	0.424
MAPK3	YAP1	9606.ENSP00000263025	9606.ENSP00000478927	0	0	0	0	0.049	0.145	0	0.369	0.442
MAPK3	HDAC2	9606.ENSP00000263025	9606.ENSP00000430432	0	0	0	0	0.054	0.127	0	0.387	0.449
MAPK3	HDAC1	9606.ENSP00000263025	9606.ENSP00000362649	0	0	0	0	0	0.078	0	0.456	0.477
MAPK3	CFL1	9606.ENSP00000263025	9606.ENSP00000432660	0	0	0	0	0.09	0	0	0.469	0.496
MAPK3	FLNA	9606.ENSP00000263025	9606.ENSP00000358866	0	0	0	0	0.049	0.078	0	0.52	0.543
MAPK3	AKT1S1	9606.ENSP00000263025	9606.ENSP00000375711	0	0	0	0	0.108	0	0	0.526	0.56
MAPK3	GTF2I	9606.ENSP00000263025	9606.ENSP00000460070	0	0	0	0	0	0.27	0	0.451	0.582
MAPK3	MEF2C	9606.ENSP00000263025	9606.ENSP00000340874	0	0	0	0	0.066	0.345	0	0.383	0.589
MAPK3	PTPRC	9606.ENSP00000263025	9606.ENSP00000411355	0	0	0	0	0.059	0.259	0	0.532	0.645
MAPK3	HNRNPK	9606.ENSP00000263025	9606.ENSP00000365439	0	0	0	0	0.062	0.112	0	0.646	0.68
MAPK3	EP300	9606.ENSP00000263025	9606.ENSP00000263253	0	0	0	0	0	0.114	0	0.69	0.714
MAPK3	BCL10	9606.ENSP00000263025	9606.ENSP00000359612	0	0	0	0	0.062	0	0.8	0.252	0.847
MAPK3	NFATC2	9606.ENSP00000263025	9606.ENSP00000379330	0	0	0	0	0	0	0.8	0.286	0.851
MAPK3	FN1	9606.ENSP00000263025	9606.ENSP00000346839	0	0	0	0	0	0	0.6	0.718	0.882
MAPK3	SLC9A1	9606.ENSP00000263025	9606.ENSP00000263980	0	0	0	0	0.079	0.108	0.8	0.472	0.901
MAPK3	AKT1	9606.ENSP00000263025	9606.ENSP00000451828	0	0	0.323	0.586	0.066	0.148	0.8	0.938	0.906
MAPK3	FOXO1	9606.ENSP00000263025	9606.ENSP00000368880	0	0	0	0	0	0.057	0.8	0.561	0.91
MAPK3	IKZF3	9606.ENSP00000263025	9606.ENSP00000344544	0	0	0	0	0	0.133	0.9	0.068	0.912
MAPK3	PTGES3	9606.ENSP00000263025	9606.ENSP00000482075	0	0	0	0	0	0.076	0.9	0.145	0.914
MAPK3	ABI1	9606.ENSP00000263025	9606.ENSP00000365312	0	0	0	0	0.062	0	0.9	0.174	0.915
MAPK3	PRKAR1A	9606.ENSP00000263025	9606.ENSP00000376475	0	0	0	0	0.063	0.074	0.9	0.237	0.925
MAPK3	PRKAR2B	9606.ENSP00000263025	9606.ENSP00000265717	0	0	0	0	0.065	0.074	0.9	0.251	0.926
MAPK3	MAPK8	9606.ENSP00000263025	9606.ENSP00000378974	0	0	0.39	0.874	0.083	0.225	0.9	0.837	0.934
MAPK3	HSP90AB1	9606.ENSP00000263025	9606.ENSP00000360609	0	0	0	0	0.054	0.299	0.9	0.374	0.953
MAPK3	PXN	9606.ENSP00000263025	9606.ENSP00000267257	0	0	0	0	0.062	0.23	0.9	0.641	0.97
MAPK3	MYC	9606.ENSP00000263025	9606.ENSP00000479618	0	0	0	0	0	0.462	0.9	0.691	0.981
MAPK3	HSP90AA1	9606.ENSP00000263025	9606.ENSP00000335153	0	0	0	0	0.054	0.299	0.9	0.866	0.99
MAPK3	PEA15	9606.ENSP00000263025	9606.ENSP00000357055	0	0	0	0	0.063	0.683	0.6	0.975	0.996
MAPK8	NFKB1	9606.ENSP00000378974	9606.ENSP00000226574	0	0	0	0	0.068	0.102	0.8	0.493	0.903
MAPK8	MAPK14	9606.ENSP00000378974	9606.ENSP00000229795	0	0	0.396	0.924	0.066	0.47	0.6	0.814	0.803
MAPK8	HSPB1	9606.ENSP00000378974	9606.ENSP00000248553	0	0	0	0	0	0.103	0	0.47	0.505
MAPK8	SPAG9	9606.ENSP00000378974	9606.ENSP00000262013	0	0	0	0	0.062	0.372	0	0.704	0.811
MAPK8	MAPK3	9606.ENSP00000378974	9606.ENSP00000263025	0	0	0.39	0.874	0.083	0.225	0.9	0.837	0.934
MAPK8	EP300	9606.ENSP00000378974	9606.ENSP00000263253	0	0	0	0	0.062	0.27	0.9	0.343	0.949
MAPK8	PXN	9606.ENSP00000378974	9606.ENSP00000267257	0	0	0	0	0	0.738	0	0.408	0.838
MAPK8	MAP1B	9606.ENSP00000378974	9606.ENSP00000296755	0	0	0	0	0.083	0.213	0	0.315	0.463
MAPK8	HSP90AA1	9606.ENSP00000378974	9606.ENSP00000335153	0	0	0	0	0	0.27	0	0.449	0.58
MAPK8	FN1	9606.ENSP00000378974	9606.ENSP00000346839	0	0	0	0	0	0	0	0.46	0.459
MAPK8	FLNA	9606.ENSP00000378974	9606.ENSP00000358866	0	0	0	0	0	0.059	0.9	0.199	0.918
MAPK8	BCL10	9606.ENSP00000378974	9606.ENSP00000359612	0	0	0	0	0	0.182	0.8	0.261	0.868
MAPK8	NCOA3	9606.ENSP00000378974	9606.ENSP00000361066	0	0	0	0	0.052	0.27	0.8	0.12	0.861
MAPK8	HDAC1	9606.ENSP00000378974	9606.ENSP00000362649	0	0	0	0	0	0.27	0	0.26	0.437
MAPK8	FOXO1	9606.ENSP00000378974	9606.ENSP00000368880	0	0	0	0	0	0.104	0.8	0.464	0.895
MAPK8	YAP1	9606.ENSP00000378974	9606.ENSP00000478927	0	0	0	0	0.063	0	0	0.405	0.418
MAPK8	IRF3	9606.ENSP00000378974	9606.ENSP00000471896	0	0	0	0	0.066	0.27	0	0.391	0.548
MAPK8	AKT1	9606.ENSP00000378974	9606.ENSP00000451828	0	0	0.417	0.573	0.084	0.315	0	0.81	0.642
MAPK8	MYC	9606.ENSP00000378974	9606.ENSP00000479618	0	0	0	0	0	0.462	0	0.562	0.754
MAPK8	NFATC2	9606.ENSP00000378974	9606.ENSP00000379330	0	0	0	0	0	0.358	0.9	0.279	0.949
MARCKS	PSMA3	9606.ENSP00000478061	9606.ENSP00000216455	0	0	0	0	0	0.27	0	0.216	0.403
MARCKS	HNRNPU	9606.ENSP00000478061	9606.ENSP00000283179	0	0	0	0	0	0.489	0	0.053	0.495
MARCKS	DBN1	9606.ENSP00000478061	9606.ENSP00000292385	0	0	0	0	0.062	0.271	0	0.26	0.449
MARCKS	ADD3	9606.ENSP00000478061	9606.ENSP00000348381	0	0	0	0	0	0	0	0.572	0.572
MARCKS	STRIP1	9606.ENSP00000478061	9606.ENSP00000358810	0	0	0	0	0	0	0	0.561	0.561
MARCKS	AKAP12	9606.ENSP00000478061	9606.ENSP00000384537	0	0	0	0	0.069	0	0	0.415	0.432
MARCKS	AKT1	9606.ENSP00000478061	9606.ENSP00000451828	0	0	0	0	0	0	0	0.424	0.424
MCM3	PSMA3	9606.ENSP00000480987	9606.ENSP00000216455	0	0	0.305	0	0.086	0.283	0	0.045	0.507
MCM3	MSH6	9606.ENSP00000480987	9606.ENSP00000234420	0	0	0	0	0.768	0.056	0	0.312	0.836
MCM3	TRIM28	9606.ENSP00000480987	9606.ENSP00000253024	0	0	0	0	0.258	0.285	0	0.094	0.478
MCM3	SMARCC1	9606.ENSP00000480987	9606.ENSP00000254480	0	0	0	0	0.413	0.113	0	0.108	0.495
MCM3	SRSF1	9606.ENSP00000480987	9606.ENSP00000258962	0	0	0	0	0.154	0	0	0.412	0.481
MCM3	EP300	9606.ENSP00000480987	9606.ENSP00000263253	0	0	0	0	0.062	0.434	0	0.193	0.534
MCM3	POLD3	9606.ENSP00000480987	9606.ENSP00000263681	0	0	0	0	0.287	0.61	0.72	0.637	0.968
MCM3	TMPO	9606.ENSP00000480987	9606.ENSP00000266732	0	0	0	0	0.235	0.27	0	0	0.418
MCM3	RPS3	9606.ENSP00000480987	9606.ENSP00000278572	0	0	0.275	0	0.12	0	0	0.223	0.461
MCM3	HCFC1	9606.ENSP00000480987	9606.ENSP00000309555	0	0	0	0	0.353	0	0	0.138	0.418
MCM3	PDS5B	9606.ENSP00000480987	9606.ENSP00000313851	0	0	0	0	0.327	0.056	0	0.186	0.437
MCM3	CHD4	9606.ENSP00000480987	9606.ENSP00000349508	0	0	0	0	0.22	0.352	0	0.056	0.481
MCM3	DNMT1	9606.ENSP00000480987	9606.ENSP00000352516	0	0	0	0	0.706	0	0	0.134	0.734
MCM3	SMC3	9606.ENSP00000480987	9606.ENSP00000354720	0	0	0	0	0.681	0	0	0.515	0.838
MCM3	HDAC1	9606.ENSP00000480987	9606.ENSP00000362649	0	0	0	0	0.438	0.057	0	0.191	0.534
MCM3	RBL1	9606.ENSP00000480987	9606.ENSP00000362768	0	0	0	0	0.511	0	0	0.44	0.714
MCM3	TP53BP1	9606.ENSP00000480987	9606.ENSP00000371475	0	0	0	0	0.65	0.186	0	0.266	0.773
MCM3	MYC	9606.ENSP00000480987	9606.ENSP00000479618	0	0	0	0	0.117	0.066	0	0.492	0.544
MCM3	POLR2A	9606.ENSP00000480987	9606.ENSP00000480158	0	0	0	0	0.084	0.471	0	0.116	0.534
MECP2	CBX5	9606.ENSP00000395535	9606.ENSP00000209875	0	0	0	0	0.062	0.486	0	0.471	0.722
MECP2	KPNA3	9606.ENSP00000395535	9606.ENSP00000261667	0	0	0	0	0	0.446	0	0.472	0.695
MECP2	EP300	9606.ENSP00000395535	9606.ENSP00000263253	0	0	0	0	0.062	0.173	0	0.459	0.543
MECP2	SMARCC2	9606.ENSP00000395535	9606.ENSP00000267064	0	0	0	0	0.067	0	0	0.455	0.471
MECP2	CBX3	9606.ENSP00000395535	9606.ENSP00000336687	0	0	0	0	0.062	0.27	0	0.378	0.536
MECP2	LBR	9606.ENSP00000395535	9606.ENSP00000339883	0	0	0	0	0	0.27	0.6	0.926	0.976
MECP2	MEF2C	9606.ENSP00000395535	9606.ENSP00000340874	0	0	0	0	0.049	0	0.9	0.405	0.938
MECP2	CHD4	9606.ENSP00000395535	9606.ENSP00000349508	0	0	0	0	0.049	0.152	0	0.319	0.402
MECP2	DNMT1	9606.ENSP00000395535	9606.ENSP00000352516	0	0	0	0	0	0.317	0	0.989	0.993
MECP2	SMC3	9606.ENSP00000395535	9606.ENSP00000354720	0	0	0	0	0.047	0.345	0	0.442	0.622
MECP2	HDAC1	9606.ENSP00000395535	9606.ENSP00000362649	0	0	0	0	0	0.858	0.9	0.988	0.999
MECP2	SRSF2	9606.ENSP00000395535	9606.ENSP00000376276	0	0	0	0	0.049	0	0	0.457	0.463
MECP2	CBX1	9606.ENSP00000395535	9606.ENSP00000377060	0	0	0	0	0.062	0.27	0	0.677	0.759
MECP2	DEK	9606.ENSP00000395535	9606.ENSP00000380414	0	0	0	0	0	0	0	0.595	0.595
MECP2	PRPF40A	9606.ENSP00000395535	9606.ENSP00000386458	0	0	0	0	0.063	0.526	0	0.097	0.564
MECP2	MYC	9606.ENSP00000395535	9606.ENSP00000479618	0	0	0	0	0	0	0	0.474	0.474
MECP2	HDAC2	9606.ENSP00000395535	9606.ENSP00000430432	0	0	0	0	0	0.179	0.9	0.985	0.998
MEF2C	MAPK14	9606.ENSP00000340874	9606.ENSP00000229795	0	0	0	0	0.066	0.502	0.9	0.338	0.965
MEF2C	SPAG9	9606.ENSP00000340874	9606.ENSP00000262013	0	0	0	0	0.062	0	0.65	0.07	0.668
MEF2C	MAPK3	9606.ENSP00000340874	9606.ENSP00000263025	0	0	0	0	0.066	0.345	0	0.383	0.589
MEF2C	EP300	9606.ENSP00000340874	9606.ENSP00000263253	0	0	0	0	0	0.538	0.9	0.596	0.979
MEF2C	BNIP2	9606.ENSP00000340874	9606.ENSP00000267859	0	0	0	0	0	0	0.65	0.057	0.655
MEF2C	BIN1	9606.ENSP00000340874	9606.ENSP00000316779	0	0	0	0	0.077	0	0	0.52	0.538
MEF2C	NFATC2	9606.ENSP00000340874	9606.ENSP00000379330	0	0	0	0	0.071	0	0	0.431	0.45
MEF2C	MYH11	9606.ENSP00000340874	9606.ENSP00000379616	0	0	0	0	0.055	0.071	0	0.456	0.481
MEF2C	FOXO1	9606.ENSP00000340874	9606.ENSP00000368880	0	0	0	0	0.062	0.168	0	0.412	0.501
MEF2C	CD2AP	9606.ENSP00000340874	9606.ENSP00000352264	0	0	0	0	0.053	0	0	0.505	0.511
MEF2C	MYC	9606.ENSP00000340874	9606.ENSP00000479618	0	0	0	0	0.049	0.079	0	0.511	0.535
MEF2C	HDAC1	9606.ENSP00000340874	9606.ENSP00000362649	0	0	0	0	0.052	0.14	0	0.551	0.603
MEF2C	POLR2A	9606.ENSP00000340874	9606.ENSP00000480158	0	0	0	0	0	0	0.9	0.1	0.906
MEF2C	MECP2	9606.ENSP00000340874	9606.ENSP00000395535	0	0	0	0	0.049	0	0.9	0.405	0.938
MEF2C	AKT1	9606.ENSP00000340874	9606.ENSP00000451828	0	0	0	0	0.049	0.076	0.9	0.428	0.943
MINK1	NRBP1	9606.ENSP00000347427	9606.ENSP00000233557	0	0	0	0	0	0.142	0	0.344	0.413
MINK1	SPAG9	9606.ENSP00000347427	9606.ENSP00000262013	0	0	0	0	0	0	0	0.444	0.444
MINK1	ENSA	9606.ENSP00000347427	9606.ENSP00000341743	0	0	0	0	0	0	0	0.871	0.872
MINK1	MAP4K4	9606.ENSP00000347427	9606.ENSP00000343658	0	0	0	0.963	0	0.153	0.9	0.601	0.913
MINK1	STRIP1	9606.ENSP00000347427	9606.ENSP00000358810	0	0	0	0	0	0.077	0	0.421	0.443
MINK1	ABI1	9606.ENSP00000347427	9606.ENSP00000365312	0	0	0	0	0	0.464	0	0.058	0.474
MINK1	TNIK	9606.ENSP00000347427	9606.ENSP00000399511	0	0	0	0.964	0	0	0.9	0.6	0.902
MPHOSPH10	FKBP15	9606.ENSP00000244230	9606.ENSP00000238256	0	0	0	0	0.6	0.183	0	0	0.659
MPHOSPH10	PPIG	9606.ENSP00000244230	9606.ENSP00000260970	0	0	0	0	0.818	0	0	0	0.818
MPHOSPH10	PWP1	9606.ENSP00000244230	9606.ENSP00000387365	0	0	0	0	0.863	0	0	0.124	0.874
MPHOSPH10	XRN2	9606.ENSP00000244230	9606.ENSP00000366396	0	0	0	0	0.15	0	0.9	0	0.911
MPHOSPH10	KRI1	9606.ENSP00000244230	9606.ENSP00000320917	0	0	0	0	0.871	0.623	0.54	0.113	0.977
MPHOSPH10	DKC1	9606.ENSP00000244230	9606.ENSP00000358563	0	0	0	0	0.834	0.684	0.72	0.277	0.988
MS4A1	TNFRSF13C	9606.ENSP00000433277	9606.ENSP00000291232	0	0	0	0	0.273	0	0	0.396	0.542
MS4A1	BANK1	9606.ENSP00000433277	9606.ENSP00000320509	0	0	0	0	0.365	0	0	0.246	0.501
MS4A1	IKZF1	9606.ENSP00000433277	9606.ENSP00000331614	0	0	0	0	0.358	0	0	0.123	0.413
MS4A1	PTPRC	9606.ENSP00000433277	9606.ENSP00000411355	0	0	0	0	0.348	0	0	0.43	0.613
MSH6	HDAC2	9606.ENSP00000234420	9606.ENSP00000430432	0.057	0	0	0	0.215	0.155	0	0.187	0.424
MSH6	HIST1H3A	9606.ENSP00000234420	9606.ENSP00000480826	0	0	0	0	0.062	0.333	0	0.189	0.449
MSH6	MYC	9606.ENSP00000234420	9606.ENSP00000479618	0	0	0	0	0.062	0.128	0	0.426	0.489
MSH6	RBL1	9606.ENSP00000234420	9606.ENSP00000362768	0	0	0	0	0.452	0	0	0.136	0.506
MSH6	DNMT1	9606.ENSP00000234420	9606.ENSP00000352516	0.071	0	0	0	0.275	0.182	0	0.29	0.557
MSH6	POLD3	9606.ENSP00000234420	9606.ENSP00000263681	0	0	0	0	0.261	0	0	0.545	0.65
MSH6	TP53BP1	9606.ENSP00000234420	9606.ENSP00000371475	0	0	0	0	0.212	0	0.36	0.464	0.706
MSH6	RAD9A	9606.ENSP00000234420	9606.ENSP00000311360	0	0	0	0	0.064	0.297	0	0.608	0.72
MSH6	MCM3	9606.ENSP00000234420	9606.ENSP00000480987	0	0	0	0	0.768	0.056	0	0.312	0.836
MSH6	SMC3	9606.ENSP00000234420	9606.ENSP00000354720	0	0	0	0	0.807	0.272	0	0.64	0.945
MTSS1L	ARAP1	9606.ENSP00000341171	9606.ENSP00000377233	0	0	0	0	0.062	0	0	0.391	0.404
MYC	VCL	9606.ENSP00000479618	9606.ENSP00000211998	0	0	0	0	0.069	0.066	0	0.541	0.566
MYC	STUB1	9606.ENSP00000479618	9606.ENSP00000219548	0	0	0	0	0	0.675	0	0.715	0.903
MYC	NFKB1	9606.ENSP00000479618	9606.ENSP00000226574	0	0	0	0	0.082	0.057	0	0.47	0.501
MYC	MAPK14	9606.ENSP00000479618	9606.ENSP00000229795	0	0	0	0	0	0.129	0.9	0.52	0.954
MYC	MSH6	9606.ENSP00000479618	9606.ENSP00000234420	0	0	0	0	0.062	0.128	0	0.426	0.489
MYC	CANX	9606.ENSP00000479618	9606.ENSP00000247461	0	0	0	0	0	0	0	0.584	0.584
MYC	HSPB1	9606.ENSP00000479618	9606.ENSP00000248553	0	0	0	0	0	0.13	0	0.579	0.618
MYC	TRIM28	9606.ENSP00000479618	9606.ENSP00000253024	0	0	0	0	0.076	0.162	0	0.531	0.606
MYC	SMARCC1	9606.ENSP00000479618	9606.ENSP00000254480	0	0	0	0	0.07	0.401	0	0.458	0.672
MYC	SRSF1	9606.ENSP00000479618	9606.ENSP00000258962	0	0	0	0	0.065	0.066	0	0.532	0.555
MYC	SPAG9	9606.ENSP00000479618	9606.ENSP00000262013	0	0	0	0	0	0.213	0	0.45	0.548
MYC	MAPK3	9606.ENSP00000479618	9606.ENSP00000263025	0	0	0	0	0	0.462	0.9	0.691	0.981
MYC	EP300	9606.ENSP00000479618	9606.ENSP00000263253	0	0	0	0	0.062	0.78	0.9	0.987	0.999
MYC	TAF12	9606.ENSP00000479618	9606.ENSP00000263974	0	0	0	0	0	0.316	0.9	0.314	0.948
MYC	NSUN2	9606.ENSP00000479618	9606.ENSP00000264670	0	0	0	0	0.076	0.128	0	0.354	0.434
MYC	PXN	9606.ENSP00000479618	9606.ENSP00000267257	0	0	0	0	0.065	0.06	0	0.467	0.49
MYC	PML	9606.ENSP00000479618	9606.ENSP00000268058	0	0	0	0	0.06	0.626	0.9	0.324	0.973
MYC	PDCD4	9606.ENSP00000479618	9606.ENSP00000280154	0	0	0	0	0	0	0	0.504	0.504
MYC	HNRNPU	9606.ENSP00000479618	9606.ENSP00000283179	0	0	0	0	0	0.279	0	0.493	0.619
MYC	IWS1	9606.ENSP00000479618	9606.ENSP00000295321	0	0	0	0	0	0	0	0.428	0.428
MYC	SNIP1	9606.ENSP00000479618	9606.ENSP00000296215	0	0	0	0	0.062	0.27	0	0.408	0.56
MYC	NPM1	9606.ENSP00000479618	9606.ENSP00000296930	0	0	0	0	0.117	0.187	0	0.938	0.952
MYC	HCFC1	9606.ENSP00000479618	9606.ENSP00000309555	0	0	0	0	0.065	0.195	0	0.295	0.423
MYC	BIN1	9606.ENSP00000479618	9606.ENSP00000316779	0	0	0	0	0.066	0.962	0	0.988	0.999
MYC	ZYX	9606.ENSP00000479618	9606.ENSP00000324422	0	0	0	0	0.066	0	0	0.39	0.406
MYC	IKZF1	9606.ENSP00000479618	9606.ENSP00000331614	0	0	0	0	0	0.058	0	0.51	0.518
MYC	HSP90AA1	9606.ENSP00000479618	9606.ENSP00000335153	0	0	0	0	0.048	0.679	0	0.953	0.984
MYC	CBX3	9606.ENSP00000479618	9606.ENSP00000336687	0	0	0	0	0.068	0.128	0	0.359	0.433
MYC	UBA1	9606.ENSP00000479618	9606.ENSP00000338413	0	0	0	0	0	0.122	0	0.391	0.442
MYC	HIST1H1C	9606.ENSP00000479618	9606.ENSP00000339566	0	0	0	0	0	0.146	0	0.325	0.4
MYC	LBR	9606.ENSP00000479618	9606.ENSP00000339883	0	0	0	0	0.069	0.111	0	0.366	0.429
MYC	MEF2C	9606.ENSP00000479618	9606.ENSP00000340874	0	0	0	0	0.049	0.079	0	0.511	0.535
MYC	HNRNPA1	9606.ENSP00000479618	9606.ENSP00000341826	0	0	0	0	0.09	0.086	0	0.534	0.579
MYC	USP7	9606.ENSP00000479618	9606.ENSP00000343535	0	0	0	0	0	0.442	0	0.459	0.685
MYC	IKZF3	9606.ENSP00000479618	9606.ENSP00000344544	0	0	0	0	0	0.058	0	0.395	0.405
MYC	FN1	9606.ENSP00000479618	9606.ENSP00000346839	0	0	0	0	0	0.122	0	0.664	0.692
MYC	CHD4	9606.ENSP00000479618	9606.ENSP00000349508	0	0	0	0	0	0.273	0	0.322	0.486
MYC	TCF20	9606.ENSP00000479618	9606.ENSP00000352463	0	0	0	0	0.062	0.279	0	0.218	0.424
MYC	DNMT1	9606.ENSP00000479618	9606.ENSP00000352516	0	0	0	0	0.085	0.128	0	0.734	0.77
MYC	PCNT	9606.ENSP00000479618	9606.ENSP00000352572	0	0	0	0	0	0	0	0.4	0.4
MYC	SMC3	9606.ENSP00000479618	9606.ENSP00000354720	0	0	0	0	0	0.092	0.9	0.412	0.942
MYC	PEA15	9606.ENSP00000479618	9606.ENSP00000357055	0	0	0	0	0	0	0	0.44	0.44
MYC	NES	9606.ENSP00000479618	9606.ENSP00000357206	0	0	0	0	0	0.066	0	0.623	0.633
MYC	DKC1	9606.ENSP00000479618	9606.ENSP00000358563	0	0	0	0	0.107	0.128	0	0.402	0.494
MYC	HSP90AB1	9606.ENSP00000479618	9606.ENSP00000360609	0	0	0	0	0.062	0.103	0	0.485	0.528
MYC	NCOA3	9606.ENSP00000479618	9606.ENSP00000361066	0	0	0	0	0	0	0.9	0.582	0.956
MYC	HDAC1	9606.ENSP00000479618	9606.ENSP00000362649	0	0	0	0	0.077	0.772	0	0.96	0.991
MYC	RBL1	9606.ENSP00000479618	9606.ENSP00000362768	0	0	0	0	0	0.27	0.9	0.938	0.995
MYC	ABI1	9606.ENSP00000479618	9606.ENSP00000365312	0	0	0	0	0	0.176	0	0.58	0.639
MYC	HNRNPK	9606.ENSP00000479618	9606.ENSP00000365439	0	0	0	0	0.062	0.229	0	0.602	0.687
MYC	FOXO1	9606.ENSP00000479618	9606.ENSP00000368880	0	0	0	0	0	0.056	0.9	0.61	0.959
MYC	TP53BP1	9606.ENSP00000479618	9606.ENSP00000371475	0	0	0	0	0	0.376	0	0.505	0.677
MYC	AKT1S1	9606.ENSP00000479618	9606.ENSP00000375711	0	0	0	0	0.065	0	0	0.418	0.433
MYC	SRSF2	9606.ENSP00000479618	9606.ENSP00000376276	0	0	0	0	0.069	0	0	0.396	0.413
MYC	MAPK8	9606.ENSP00000479618	9606.ENSP00000378974	0	0	0	0	0	0.462	0	0.562	0.754
MYC	NFATC2	9606.ENSP00000479618	9606.ENSP00000379330	0	0	0	0	0	0	0	0.411	0.411
MYC	ETV6	9606.ENSP00000479618	9606.ENSP00000379658	0	0	0	0	0.062	0.108	0	0.46	0.508
MYC	DEK	9606.ENSP00000479618	9606.ENSP00000380414	0	0	0	0	0	0.27	0	0.344	0.5
MYC	MECP2	9606.ENSP00000479618	9606.ENSP00000395535	0	0	0	0	0	0	0	0.474	0.474
MYC	PTPRC	9606.ENSP00000479618	9606.ENSP00000411355	0	0	0	0	0	0	0	0.601	0.601
MYC	ERBB2IP	9606.ENSP00000479618	9606.ENSP00000426632	0	0	0	0	0.062	0.122	0	0.579	0.623
MYC	HDAC2	9606.ENSP00000479618	9606.ENSP00000430432	0	0	0	0	0	0.462	0	0.57	0.759
MYC	CFL1	9606.ENSP00000479618	9606.ENSP00000432660	0	0	0	0	0.068	0.122	0	0.37	0.439
MYC	AKT1	9606.ENSP00000479618	9606.ENSP00000451828	0	0	0	0	0.051	0.143	0.9	0.859	0.987
MYC	GTF2I	9606.ENSP00000479618	9606.ENSP00000460070	0	0	0	0	0	0.452	0	0.829	0.902
MYC	IRF3	9606.ENSP00000479618	9606.ENSP00000471896	0	0	0	0	0	0	0	0.456	0.456
MYC	YAP1	9606.ENSP00000479618	9606.ENSP00000478927	0	0	0	0	0	0.128	0	0.56	0.6
MYC	MCM3	9606.ENSP00000479618	9606.ENSP00000480987	0	0	0	0	0.117	0.066	0	0.492	0.544
MYC	POLR2A	9606.ENSP00000479618	9606.ENSP00000480158	0	0	0	0	0.062	0.632	0	0.542	0.828
MYH11	VCL	9606.ENSP00000379616	9606.ENSP00000211998	0	0	0	0	0.064	0.154	0.6	0.462	0.807
MYH11	MYH9	9606.ENSP00000379616	9606.ENSP00000216181	0	0	0	0.979	0	0	0.9	0.446	0.9
MYH11	PXN	9606.ENSP00000379616	9606.ENSP00000267257	0	0	0	0	0.064	0.16	0.6	0.239	0.728
MYH11	NPM1	9606.ENSP00000379616	9606.ENSP00000296930	0	0	0	0	0	0.084	0	0.658	0.673
MYH11	SYNPO2	9606.ENSP00000379616	9606.ENSP00000306015	0	0	0	0	0.161	0.149	0	0.264	0.429
MYH11	HSP90AA1	9606.ENSP00000379616	9606.ENSP00000335153	0	0	0	0	0.062	0.305	0	0.29	0.497
MYH11	MEF2C	9606.ENSP00000379616	9606.ENSP00000340874	0	0	0	0	0.055	0.071	0	0.456	0.481
MYH11	FN1	9606.ENSP00000379616	9606.ENSP00000346839	0	0	0	0	0	0	0	0.407	0.407
MYH11	TAGLN2	9606.ENSP00000379616	9606.ENSP00000357076	0	0	0	0	0.062	0	0	0.518	0.528
MYH11	FLNA	9606.ENSP00000379616	9606.ENSP00000358866	0	0	0	0	0.068	0.188	0	0.494	0.584
MYH11	HDAC1	9606.ENSP00000379616	9606.ENSP00000362649	0	0	0	0	0.049	0.056	0	0.406	0.421
MYH11	ETV6	9606.ENSP00000379616	9606.ENSP00000379658	0	0	0	0	0.064	0	0	0.471	0.483
MYH11	DEK	9606.ENSP00000379616	9606.ENSP00000380414	0	0	0	0	0	0.078	0	0.563	0.579
MYH11	PPP1R12A	9606.ENSP00000379616	9606.ENSP00000389168	0	0	0	0	0.049	0.169	0.9	0.361	0.942
MYH9	VCL	9606.ENSP00000216181	9606.ENSP00000211998	0	0	0	0	0.118	0.154	0	0.535	0.623
MYH9	LCP1	9606.ENSP00000216181	9606.ENSP00000381581	0	0	0	0	0.055	0.076	0	0.374	0.405
MYH9	DBN1	9606.ENSP00000216181	9606.ENSP00000292385	0	0	0	0	0.062	0.221	0	0.268	0.418
MYH9	FMNL1	9606.ENSP00000216181	9606.ENSP00000329219	0	0	0	0	0.07	0.248	0	0.257	0.435
MYH9	PPP1R9B	9606.ENSP00000216181	9606.ENSP00000478767	0	0	0	0	0.087	0.427	0	0.043	0.455
MYH9	ETV6	9606.ENSP00000216181	9606.ENSP00000379658	0	0	0	0	0.064	0	0	0.474	0.486
MYH9	PXN	9606.ENSP00000216181	9606.ENSP00000267257	0	0	0	0	0.109	0.16	0	0.369	0.487
MYH9	EPB41L2	9606.ENSP00000216181	9606.ENSP00000338481	0	0	0	0	0.062	0.368	0	0.214	0.493
MYH9	CD2AP	9606.ENSP00000216181	9606.ENSP00000352264	0	0	0	0	0.092	0.058	0	0.462	0.499
MYH9	2002-09-01	9606.ENSP00000216181	9606.ENSP00000479861	0	0	0	0	0.062	0.056	0	0.504	0.523
MYH9	CFL1	9606.ENSP00000216181	9606.ENSP00000432660	0	0	0	0	0.091	0.195	0	0.416	0.536
MYH9	SPTAN1	9606.ENSP00000216181	9606.ENSP00000361824	0	0	0	0	0.109	0.394	0	0.256	0.564
MYH9	ZYX	9606.ENSP00000216181	9606.ENSP00000324422	0	0	0	0	0.202	0.116	0	0.445	0.574
MYH9	FN1	9606.ENSP00000216181	9606.ENSP00000346839	0	0	0	0	0.085	0.277	0	0.417	0.58
MYH9	AKT1	9606.ENSP00000216181	9606.ENSP00000451828	0	0	0	0	0.088	0.295	0	0.403	0.583
MYH9	PDLIM2	9606.ENSP00000216181	9606.ENSP00000312634	0	0	0	0	0.062	0.176	0	0.538	0.612
MYH9	HSP90AA1	9606.ENSP00000216181	9606.ENSP00000335153	0	0	0	0	0.062	0.322	0	0.473	0.636
MYH9	HSP90AB1	9606.ENSP00000216181	9606.ENSP00000360609	0	0	0	0	0.062	0.565	0	0.274	0.678
MYH9	FLNA	9606.ENSP00000216181	9606.ENSP00000358866	0	0	0	0	0.195	0.46	0	0.505	0.766
MYH9	MYH11	9606.ENSP00000216181	9606.ENSP00000379616	0	0	0	0.979	0	0	0.9	0.446	0.9
MYH9	MYO9B	9606.ENSP00000216181	9606.ENSP00000471457	0	0	0	0.613	0.16	0.125	0.9	0.265	0.927
MYH9	PPP1R12A	9606.ENSP00000216181	9606.ENSP00000389168	0	0	0	0	0.062	0.246	0.9	0.324	0.945
MYO18A	SPTBN1	9606.ENSP00000437073	9606.ENSP00000349259	0	0	0	0	0.049	0.161	0.6	0.253	0.73
MYO18A	FGFR1OP	9606.ENSP00000437073	9606.ENSP00000355812	0	0	0	0	0	0	0.5	0.649	0.816
MYO18A	LRRFIP1	9606.ENSP00000437073	9606.ENSP00000375857	0	0	0	0	0	0	0.5	0.298	0.634
MYO18A	ETV6	9606.ENSP00000437073	9606.ENSP00000379658	0	0	0	0	0.052	0	0.6	0.553	0.815
MYO18A	CFL1	9606.ENSP00000437073	9606.ENSP00000432660	0	0	0	0	0.063	0.338	0	0.247	0.493
MYO18A	RABEP1	9606.ENSP00000437073	9606.ENSP00000445408	0	0	0	0	0	0	0	0.43	0.43
MYO9B	MYH9	9606.ENSP00000471457	9606.ENSP00000216181	0	0	0	0.613	0.16	0.125	0.9	0.265	0.927
MYO9B	FMNL1	9606.ENSP00000471457	9606.ENSP00000329219	0	0	0	0	0.133	0.246	0	0.234	0.456
MYO9B	AKAP13	9606.ENSP00000471457	9606.ENSP00000354718	0	0	0	0	0.062	0.167	0	0.338	0.438
MYO9B	ARHGAP27	9606.ENSP00000471457	9606.ENSP00000403323	0	0	0	0.556	0.081	0.452	0	0.525	0.592
NAV1	SLC9A1	9606.ENSP00000356265	9606.ENSP00000263980	0	0	0	0	0	0	0	0.502	0.502
NAV1	PLEKHA6	9606.ENSP00000356265	9606.ENSP00000272203	0	0	0	0	0	0	0	0.468	0.468
NCOA1	NFKB1	9606.ENSP00000385216	9606.ENSP00000226574	0	0	0	0	0	0.494	0	0.203	0.579
NCOA1	SMARCC1	9606.ENSP00000385216	9606.ENSP00000254480	0	0	0	0	0	0.34	0	0.131	0.403
NCOA1	EP300	9606.ENSP00000385216	9606.ENSP00000263253	0	0	0	0	0.062	0.779	0.9	0.962	0.999
NCOA1	THRAP3	9606.ENSP00000385216	9606.ENSP00000346634	0	0	0	0	0	0	0.8	0.074	0.806
NCOA1	NCOA3	9606.ENSP00000385216	9606.ENSP00000361066	0	0	0	0.77	0.062	0.682	0.9	0.917	0.974
NCOA1	FOXO1	9606.ENSP00000385216	9606.ENSP00000368880	0	0	0	0	0	0.298	0	0.377	0.544
NCOA1	POLR2A	9606.ENSP00000385216	9606.ENSP00000480158	0	0	0	0	0	0	0.9	0	0.9
NCOA3	NFKB1	9606.ENSP00000361066	9606.ENSP00000226574	0	0	0	0	0.072	0.281	0	0.257	0.461
NCOA3	MAPK14	9606.ENSP00000361066	9606.ENSP00000229795	0	0	0	0	0	0.679	0.9	0.113	0.969
NCOA3	PIAS1	9606.ENSP00000361066	9606.ENSP00000249636	0	0	0	0	0.063	0.282	0	0.25	0.451
NCOA3	EP300	9606.ENSP00000361066	9606.ENSP00000263253	0	0	0	0	0.065	0.893	0.9	0.982	0.999
NCOA3	HSP90AA1	9606.ENSP00000361066	9606.ENSP00000335153	0	0	0	0	0.063	0.078	0	0.476	0.507
NCOA3	THRAP3	9606.ENSP00000361066	9606.ENSP00000346634	0	0	0	0	0.042	0	0.8	0.09	0.81
NCOA3	DEK	9606.ENSP00000361066	9606.ENSP00000380414	0	0	0	0	0.049	0	0	0.431	0.436
NCOA3	TLE3	9606.ENSP00000361066	9606.ENSP00000452871	0	0	0	0	0.056	0	0	0.443	0.452
NCOA3	HDAC1	9606.ENSP00000361066	9606.ENSP00000362649	0	0	0	0	0.067	0	0	0.535	0.548
NCOA3	IRF3	9606.ENSP00000361066	9606.ENSP00000471896	0	0	0	0	0.049	0	0	0.558	0.561
NCOA3	AKT1	9606.ENSP00000361066	9606.ENSP00000451828	0	0	0	0	0	0	0	0.602	0.602
NCOA3	YAP1	9606.ENSP00000361066	9606.ENSP00000478927	0	0	0	0	0.062	0.126	0	0.582	0.627
NCOA3	MAPK8	9606.ENSP00000361066	9606.ENSP00000378974	0	0	0	0	0.052	0.27	0.8	0.12	0.861
NCOA3	POLR2A	9606.ENSP00000361066	9606.ENSP00000480158	0	0	0	0	0.059	0	0.9	0.12	0.91
NCOA3	MYC	9606.ENSP00000361066	9606.ENSP00000479618	0	0	0	0	0	0	0.9	0.582	0.956
NCOA3	NCOA1	9606.ENSP00000361066	9606.ENSP00000385216	0	0	0	0.77	0.062	0.682	0.9	0.917	0.974
NELFE	CDK13	9606.ENSP00000364578	9606.ENSP00000181839	0	0	0	0	0.073	0	0	0.437	0.456
NELFE	PSMA3	9606.ENSP00000364578	9606.ENSP00000216455	0	0	0	0	0	0.678	0	0	0.678
NELFE	SRSF1	9606.ENSP00000364578	9606.ENSP00000258962	0	0	0	0	0.059	0.371	0	0.088	0.413
NELFE	IWS1	9606.ENSP00000364578	9606.ENSP00000295321	0	0	0	0	0.088	0	0.6	0	0.619
NELFE	HSP90AA1	9606.ENSP00000364578	9606.ENSP00000335153	0	0	0	0	0	0.246	0	0.466	0.58
NELFE	HSP90AB1	9606.ENSP00000364578	9606.ENSP00000360609	0	0	0	0	0	0.426	0	0.048	0.43
NELFE	XRN2	9606.ENSP00000364578	9606.ENSP00000366396	0	0	0	0	0.112	0	0	0.444	0.485
NELFE	CCNK	9606.ENSP00000364578	9606.ENSP00000374529	0	0	0	0	0.085	0	0.6	0.441	0.777
NELFE	POLR2A	9606.ENSP00000364578	9606.ENSP00000480158	0	0	0	0	0.082	0.903	0.6	0.529	0.981
NES	MAPK3	9606.ENSP00000357206	9606.ENSP00000263025	0	0	0	0	0	0	0	0.424	0.424
NES	MAP1B	9606.ENSP00000357206	9606.ENSP00000296755	0	0	0	0	0.215	0	0	0.391	0.501
NES	FN1	9606.ENSP00000357206	9606.ENSP00000346839	0	0	0	0	0.199	0	0	0.647	0.705
NES	AKT1	9606.ENSP00000357206	9606.ENSP00000451828	0	0	0	0	0.062	0	0	0.595	0.603
NES	PTPRC	9606.ENSP00000357206	9606.ENSP00000411355	0	0	0	0	0	0	0	0.629	0.629
NES	MYC	9606.ENSP00000357206	9606.ENSP00000479618	0	0	0	0	0	0.066	0	0.623	0.633
NFATC2	MAPK14	9606.ENSP00000379330	9606.ENSP00000229795	0	0	0	0	0	0	0.9	0.224	0.919
NFATC2	MAPK3	9606.ENSP00000379330	9606.ENSP00000263025	0	0	0	0	0	0	0.8	0.286	0.851
NFATC2	EP300	9606.ENSP00000379330	9606.ENSP00000263253	0	0	0	0	0.062	0.429	0.9	0.471	0.967
NFATC2	IKZF1	9606.ENSP00000379330	9606.ENSP00000331614	0	0	0	0	0.114	0.142	0	0.354	0.466
NFATC2	MEF2C	9606.ENSP00000379330	9606.ENSP00000340874	0	0	0	0	0.071	0	0	0.431	0.45
NFATC2	HDAC1	9606.ENSP00000379330	9606.ENSP00000362649	0	0	0	0	0.047	0.129	0	0.895	0.906
NFATC2	MAPK8	9606.ENSP00000379330	9606.ENSP00000378974	0	0	0	0	0	0.358	0.9	0.279	0.949
NFATC2	AKT1	9606.ENSP00000379330	9606.ENSP00000451828	0	0	0	0	0	0	0	0.401	0.401
NFATC2	MYC	9606.ENSP00000379330	9606.ENSP00000479618	0	0	0	0	0	0	0	0.411	0.411
NFKB1	PSMA3	9606.ENSP00000226574	9606.ENSP00000216455	0	0	0	0	0.249	0.149	0.9	0.054	0.931
NFKB1	TNFRSF13C	9606.ENSP00000226574	9606.ENSP00000291232	0	0	0	0	0	0	0	0.436	0.436
NFKB1	IRF3	9606.ENSP00000226574	9606.ENSP00000471896	0	0	0	0	0.119	0	0	0.392	0.441
NFKB1	NCOA3	9606.ENSP00000226574	9606.ENSP00000361066	0	0	0	0	0.072	0.281	0	0.257	0.461
NFKB1	LCP1	9606.ENSP00000226574	9606.ENSP00000381581	0	0	0	0	0.107	0.139	0	0.365	0.469
NFKB1	BANK1	9606.ENSP00000226574	9606.ENSP00000320509	0	0	0	0	0	0.058	0	0.482	0.491
NFKB1	MYC	9606.ENSP00000226574	9606.ENSP00000479618	0	0	0	0	0.082	0.057	0	0.47	0.501
NFKB1	DPF2	9606.ENSP00000226574	9606.ENSP00000436901	0	0	0	0	0.07	0.538	0	0	0.552
NFKB1	NCOA1	9606.ENSP00000226574	9606.ENSP00000385216	0	0	0	0	0	0.494	0	0.203	0.579
NFKB1	ELF1	9606.ENSP00000226574	9606.ENSP00000239882	0	0	0	0	0.13	0.494	0	0.149	0.593
NFKB1	HSP90AB1	9606.ENSP00000226574	9606.ENSP00000360609	0	0	0	0	0.101	0.506	0	0.206	0.617
NFKB1	RPS3	9606.ENSP00000226574	9606.ENSP00000278572	0	0	0	0	0.123	0.721	0	0.182	0.782
NFKB1	BCL10	9606.ENSP00000226574	9606.ENSP00000359612	0	0	0	0	0.065	0.057	0.65	0.388	0.786
NFKB1	TNIP1	9606.ENSP00000226574	9606.ENSP00000317891	0	0	0	0	0.149	0.68	0	0.472	0.843
NFKB1	KPNA3	9606.ENSP00000226574	9606.ENSP00000261667	0	0	0	0	0	0.296	0.8	0.114	0.864
NFKB1	MAPK8	9606.ENSP00000226574	9606.ENSP00000378974	0	0	0	0	0.068	0.102	0.8	0.493	0.903
NFKB1	POU2F2	9606.ENSP00000226574	9606.ENSP00000431603	0	0	0	0	0	0.058	0.9	0.18	0.916
NFKB1	MAPK3	9606.ENSP00000226574	9606.ENSP00000263025	0	0	0	0	0	0.134	0.9	0.402	0.943
NFKB1	MAPK14	9606.ENSP00000226574	9606.ENSP00000229795	0	0	0	0	0.065	0.134	0.9	0.463	0.95
NFKB1	HDAC2	9606.ENSP00000226574	9606.ENSP00000430432	0	0	0	0	0.066	0.4	0.9	0.258	0.952
NFKB1	AKT1	9606.ENSP00000226574	9606.ENSP00000451828	0	0	0	0	0.066	0.176	0.9	0.526	0.958
NFKB1	EP300	9606.ENSP00000226574	9606.ENSP00000263253	0	0	0	0	0	0.873	0.9	0.438	0.992
NFKB1	HDAC1	9606.ENSP00000226574	9606.ENSP00000362649	0	0	0	0	0.074	0.894	0	0.971	0.996
NIPBL	CDK13	9606.ENSP00000282516	9606.ENSP00000181839	0	0	0	0	0.423	0	0	0.06	0.435
NIPBL	CBX5	9606.ENSP00000282516	9606.ENSP00000209875	0	0	0	0	0.062	0.583	0	0.451	0.766
NIPBL	EP300	9606.ENSP00000282516	9606.ENSP00000263253	0	0	0	0	0.11	0.093	0	0.481	0.545
NIPBL	DIDO1	9606.ENSP00000282516	9606.ENSP00000266070	0	0	0	0	0.489	0	0	0.137	0.54
NIPBL	CDK5RAP2	9606.ENSP00000282516	9606.ENSP00000343818	0	0	0	0	0.063	0	0	0.396	0.41
NIPBL	CBX1	9606.ENSP00000282516	9606.ENSP00000377060	0	0	0	0	0.062	0.222	0	0.291	0.437
NIPBL	CHD4	9606.ENSP00000282516	9606.ENSP00000349508	0	0	0	0	0.115	0.153	0	0.353	0.473
NIPBL	ITSN1	9606.ENSP00000282516	9606.ENSP00000370719	0	0	0	0	0.424	0	0	0.191	0.514
NIPBL	HDAC1	9606.ENSP00000282516	9606.ENSP00000362649	0	0	0	0	0.062	0.155	0	0.449	0.526
NIPBL	PCNT	9606.ENSP00000282516	9606.ENSP00000352572	0	0	0	0	0.296	0	0	0.471	0.611
NIPBL	ERBB2IP	9606.ENSP00000282516	9606.ENSP00000426632	0	0	0	0	0.653	0	0	0	0.653
NIPBL	ZNF609	9606.ENSP00000282516	9606.ENSP00000316527	0	0	0	0	0.062	0	0.72	0.141	0.754
NIPBL	CBX3	9606.ENSP00000282516	9606.ENSP00000336687	0	0	0	0	0.067	0.736	0	0.631	0.901
NIPBL	PDS5B	9606.ENSP00000282516	9606.ENSP00000313851	0	0	0	0	0.653	0.7	0.6	0.808	0.99
NIPBL	SMC3	9606.ENSP00000282516	9606.ENSP00000354720	0	0	0	0	0.68	0.989	0.6	0.95	0.999
NPM1	PSMA3	9606.ENSP00000296930	9606.ENSP00000216455	0	0	0	0	0.19	0.282	0	0.175	0.478
NPM1	HSPB1	9606.ENSP00000296930	9606.ENSP00000248553	0	0	0	0	0	0.27	0	0.218	0.404
NPM1	TRIM28	9606.ENSP00000296930	9606.ENSP00000253024	0	0	0	0	0.11	0.495	0	0.215	0.616
NPM1	SRSF1	9606.ENSP00000296930	9606.ENSP00000258962	0	0	0	0	0.173	0.664	0	0.224	0.766
NPM1	EP300	9606.ENSP00000296930	9606.ENSP00000263253	0	0	0	0	0	0.495	0	0.349	0.657
NPM1	NSUN2	9606.ENSP00000296930	9606.ENSP00000264670	0	0	0	0	0.1	0.468	0.9	0.826	0.99
NPM1	PML	9606.ENSP00000296930	9606.ENSP00000268058	0	0	0	0	0	0.494	0	0.397	0.681
NPM1	RPS3	9606.ENSP00000296930	9606.ENSP00000278572	0	0	0	0	0.286	0.239	0	0.264	0.566
NPM1	HNRNPU	9606.ENSP00000296930	9606.ENSP00000283179	0	0	0	0	0.162	0.499	0	0.742	0.882
NPM1	RANBP2	9606.ENSP00000296930	9606.ENSP00000283195	0	0	0	0	0.166	0.057	0.6	0.348	0.767
NPM1	LIMCH1	9606.ENSP00000296930	9606.ENSP00000316891	0	0	0	0	0	0.244	0	0.239	0.4
NPM1	DNMT1	9606.ENSP00000296930	9606.ENSP00000352516	0	0	0	0	0.086	0	0	0.382	0.411
NPM1	CHD4	9606.ENSP00000296930	9606.ENSP00000349508	0	0	0	0	0.106	0.319	0	0.163	0.446
NPM1	PRAM1	9606.ENSP00000296930	9606.ENSP00000408342	0	0	0	0	0	0	0	0.454	0.454
NPM1	SERBP1	9606.ENSP00000296930	9606.ENSP00000360034	0	0	0	0	0.374	0.208	0	0	0.483
NPM1	PRKAR1A	9606.ENSP00000296930	9606.ENSP00000376475	0	0	0	0	0	0.27	0	0.325	0.486
NPM1	HIST1H1B	9606.ENSP00000296930	9606.ENSP00000330074	0	0	0	0	0.062	0.421	0	0.133	0.488
NPM1	DKC1	9606.ENSP00000296930	9606.ENSP00000358563	0	0	0	0	0.298	0	0	0.304	0.491
NPM1	EEF1D	9606.ENSP00000296930	9606.ENSP00000410059	0	0	0	0	0.14	0.27	0	0.261	0.495
NPM1	RPLP0	9606.ENSP00000296930	9606.ENSP00000449328	0	0	0	0	0.279	0.282	0	0.171	0.533
NPM1	RPLP1	9606.ENSP00000296930	9606.ENSP00000346037	0	0	0	0	0.19	0.286	0	0.283	0.549
NPM1	HNRNPH1	9606.ENSP00000296930	9606.ENSP00000349168	0	0	0	0	0.184	0.343	0	0.257	0.567
NPM1	SMC3	9606.ENSP00000296930	9606.ENSP00000354720	0	0	0	0	0.187	0	0	0.493	0.57
NPM1	HSP90AB1	9606.ENSP00000296930	9606.ENSP00000360609	0	0	0	0	0.206	0.294	0	0.302	0.574
NPM1	HNRNPK	9606.ENSP00000296930	9606.ENSP00000365439	0	0	0	0	0.157	0.078	0	0.525	0.599
NPM1	HDAC1	9606.ENSP00000296930	9606.ENSP00000362649	0	0	0	0	0.166	0.289	0	0.38	0.6
NPM1	HIST1H1C	9606.ENSP00000296930	9606.ENSP00000339566	0	0	0	0	0.083	0.481	0	0.234	0.604
[truncated: 1,243 more rows]

## Sheet: High Confidence
#node1	node2	node1_string_id	node2_string_id	neighborhood_on_chromosome	gene_fusion	phylogenetic_cooccurrence	homology	coexpression	experimentally_determined_interaction	database_annotated	automated_textmining	combined_score
AAK1	ITSN1	9606.ENSP00000386456	9606.ENSP00000370719	0	0	0	0	0.108	0.104	0.6	0.421	0.79
AAK1	DBNL	9606.ENSP00000386456	9606.ENSP00000417653	0	0	0	0	0.072	0.604	0	0.38	0.752
AAK1	REPS1	9606.ENSP00000386456	9606.ENSP00000392065	0	0	0	0	0	0.799	0.8	0.223	0.966
ABI1	VASP	9606.ENSP00000365312	9606.ENSP00000245932	0	0	0	0	0.065	0.533	0	0.745	0.879
ABI1	MAPK3	9606.ENSP00000365312	9606.ENSP00000263025	0	0	0	0	0.062	0	0.9	0.174	0.915
ABI1	FNBP1	9606.ENSP00000365312	9606.ENSP00000413625	0	0	0	0	0.062	0.21	0	0.757	0.804
ABI1	AKT1	9606.ENSP00000365312	9606.ENSP00000451828	0	0	0	0	0	0.143	0	0.808	0.829
ABI1	ITGA4	9606.ENSP00000365312	9606.ENSP00000380227	0	0	0	0	0	0.334	0.9	0.09	0.934
ABI1	HNRNPK	9606.ENSP00000365312	9606.ENSP00000365439	0	0	0	0	0.112	0.104	0	0.937	0.946
ACACA	PRKAB1	9606.ENSP00000483300	9606.ENSP00000229328	0	0	0	0	0.062	0.27	0.9	0.412	0.954
ACIN1	PIAS1	9606.ENSP00000262710	9606.ENSP00000249636	0	0	0	0	0.088	0	0	0.733	0.746
ACIN1	PRPF40A	9606.ENSP00000262710	9606.ENSP00000386458	0	0	0	0	0.147	0.681	0	0.09	0.731
ACIN1	SNIP1	9606.ENSP00000262710	9606.ENSP00000296215	0	0	0	0	0.084	0.67	0	0.202	0.737
ACIN1	SRRM1	9606.ENSP00000262710	9606.ENSP00000326261	0	0	0	0	0.318	0.39	0	0.447	0.75
ACIN1	HNRNPU	9606.ENSP00000262710	9606.ENSP00000283179	0	0	0	0	0.145	0	0	0.885	0.898
ACIN1	SRRM2	9606.ENSP00000262710	9606.ENSP00000301740	0	0	0	0	0.775	0.681	0	0.432	0.955
ACIN1	API5	9606.ENSP00000262710	9606.ENSP00000431391	0	0	0	0	0.119	0.412	0	0.955	0.975
AKAP12	AKAP13	9606.ENSP00000384537	9606.ENSP00000354718	0	0	0	0	0	0	0	0.758	0.759
AKAP13	PRKAR2B	9606.ENSP00000354718	9606.ENSP00000265717	0	0	0	0	0.062	0.205	0.9	0.562	0.962
AKAP13	BNIP2	9606.ENSP00000354718	9606.ENSP00000267859	0	0	0	0	0	0	0	0.748	0.748
AKAP13	AKAP2	9606.ENSP00000354718	9606.ENSP00000404782	0	0	0	0	0	0	0	0.73	0.73
AKAP13	AKAP12	9606.ENSP00000354718	9606.ENSP00000384537	0	0	0	0	0	0	0	0.758	0.759
AKAP2	PRKAR2B	9606.ENSP00000404782	9606.ENSP00000265717	0	0	0	0	0	0.647	0	0.432	0.791
AKAP2	AKAP13	9606.ENSP00000404782	9606.ENSP00000354718	0	0	0	0	0	0	0	0.73	0.73
AKT1	VCL	9606.ENSP00000451828	9606.ENSP00000211998	0	0	0	0	0.063	0	0	0.712	0.719
AKT1	STUB1	9606.ENSP00000451828	9606.ENSP00000219548	0	0	0	0	0.077	0.519	0	0.633	0.823
AKT1	NFKB1	9606.ENSP00000451828	9606.ENSP00000226574	0	0	0	0	0.066	0.176	0.9	0.526	0.958
AKT1	MAPK14	9606.ENSP00000451828	9606.ENSP00000229795	0	0	0.303	0.623	0.083	0.83	0.6	0.769	0.956
AKT1	HSPB1	9606.ENSP00000451828	9606.ENSP00000248553	0	0	0	0	0	0.76	0	0.982	0.995
AKT1	DOCK2	9606.ENSP00000451828	9606.ENSP00000256935	0	0	0	0	0	0.057	0	0.918	0.92
AKT1	SPAG9	9606.ENSP00000451828	9606.ENSP00000262013	0	0	0	0	0	0.057	0	0.893	0.895
AKT1	MAPK3	9606.ENSP00000451828	9606.ENSP00000263025	0	0	0.323	0.586	0.066	0.148	0.8	0.938	0.906
AKT1	EP300	9606.ENSP00000451828	9606.ENSP00000263253	0	0	0	0	0	0.885	0.9	0.903	0.998
AKT1	PXN	9606.ENSP00000451828	9606.ENSP00000267257	0	0	0	0	0.083	0.063	0	0.874	0.883
AKT1	PML	9606.ENSP00000451828	9606.ENSP00000268058	0	0	0	0	0	0.057	0.9	0.654	0.964
AKT1	LAMTOR1	9606.ENSP00000451828	9606.ENSP00000278671	0	0	0	0	0.048	0	0.9	0.26	0.923
AKT1	NPM1	9606.ENSP00000451828	9606.ENSP00000296930	0	0	0	0	0	0.285	0	0.714	0.788
AKT1	PA2G4	9606.ENSP00000451828	9606.ENSP00000302886	0	0	0	0	0	0.27	0	0.905	0.928
AKT1	FMNL1	9606.ENSP00000451828	9606.ENSP00000329219	0	0	0	0	0.062	0.119	0	0.703	0.733
AKT1	HSP90AA1	9606.ENSP00000451828	9606.ENSP00000335153	0	0	0	0	0.062	0.946	0.9	0.991	0.999
AKT1	MEF2C	9606.ENSP00000451828	9606.ENSP00000340874	0	0	0	0	0.049	0.076	0.9	0.428	0.943
AKT1	FN1	9606.ENSP00000451828	9606.ENSP00000346839	0	0	0	0	0.051	0	0	0.776	0.778
AKT1	CRTC2	9606.ENSP00000451828	9606.ENSP00000357622	0	0	0	0	0.069	0.058	0.8	0.424	0.885
AKT1	DKC1	9606.ENSP00000451828	9606.ENSP00000358563	0	0	0	0	0	0.089	0.9	0.148	0.915
AKT1	BCL10	9606.ENSP00000451828	9606.ENSP00000359612	0	0	0	0	0	0.658	0	0.419	0.793
AKT1	HSP90AB1	9606.ENSP00000451828	9606.ENSP00000360609	0	0	0	0	0.062	0.819	0.6	0.78	0.983
AKT1	ABI1	9606.ENSP00000451828	9606.ENSP00000365312	0	0	0	0	0	0.143	0	0.808	0.829
AKT1	FOXO1	9606.ENSP00000451828	9606.ENSP00000368880	0	0	0	0	0.048	0.889	0.9	0.859	0.998
AKT1	AKT1S1	9606.ENSP00000451828	9606.ENSP00000375711	0	0	0	0	0.091	0.687	0.9	0.781	0.992
AKT1	USP8	9606.ENSP00000451828	9606.ENSP00000379721	0	0	0	0	0.055	0.281	0.9	0.267	0.943
AKT1	CFL1	9606.ENSP00000451828	9606.ENSP00000432660	0	0	0	0	0.12	0.079	0	0.666	0.706
AKT1	DENND1B	9606.ENSP00000451828	9606.ENSP00000479816	0	0	0	0	0	0	0.9	0	0.9
AKT1	PTGES3	9606.ENSP00000451828	9606.ENSP00000482075	0	0	0	0	0	0.057	0.9	0.449	0.943
AKT1	MYC	9606.ENSP00000451828	9606.ENSP00000479618	0	0	0	0	0.051	0.143	0.9	0.859	0.987
AKT1S1	PML	9606.ENSP00000375711	9606.ENSP00000268058	0	0	0	0	0	0	0.9	0	0.9
AKT1S1	LAMTOR1	9606.ENSP00000375711	9606.ENSP00000278671	0	0	0	0	0.063	0	0.6	0.418	0.763
AKT1S1	AKT1	9606.ENSP00000375711	9606.ENSP00000451828	0	0	0	0	0.091	0.687	0.9	0.781	0.992
ALKBH5	YTHDC1	9606.ENSP00000382091	9606.ENSP00000339245	0	0	0	0	0.059	0	0	0.89	0.892
ANP32A	MAP1B	9606.ENSP00000417864	9606.ENSP00000296755	0	0	0	0	0.062	0.298	0	0.888	0.92
ANP32A	ANP32B	9606.ENSP00000417864	9606.ENSP00000345848	0	0	0	0.967	0.1	0.706	0	0.825	0.732
ANP32A	SET	9606.ENSP00000417864	9606.ENSP00000361777	0	0	0	0	0.296	0.682	0.9	0.916	0.997
ANP32B	ANP32A	9606.ENSP00000345848	9606.ENSP00000417864	0	0	0	0.967	0.1	0.706	0	0.825	0.732
AP3D1	HTATSF1	9606.ENSP00000347416	9606.ENSP00000442699	0	0	0	0	0	0.271	0	0.653	0.736
API5	RBM25	9606.ENSP00000431391	9606.ENSP00000261973	0	0	0	0	0.459	0	0	0.59	0.769
API5	ACIN1	9606.ENSP00000431391	9606.ENSP00000262710	0	0	0	0	0.119	0.412	0	0.955	0.975
ARAP1	SH3KBP1	9606.ENSP00000377233	9606.ENSP00000380921	0	0	0	0	0.059	0.875	0	0.846	0.98
ARHGAP1	BNIP2	9606.ENSP00000310491	9606.ENSP00000267859	0	0	0	0.659	0	0.779	0	0.826	0.84
ARHGAP27	SH3KBP1	9606.ENSP00000403323	9606.ENSP00000380921	0	0	0	0	0	0.375	0	0.839	0.895
ARHGEF6	PXN	9606.ENSP00000250617	9606.ENSP00000267257	0	0	0	0	0.06	0.425	0.9	0.67	0.979
BCL10	NFKB1	9606.ENSP00000359612	9606.ENSP00000226574	0	0	0	0	0.065	0.057	0.65	0.388	0.786
BCL10	MAPK3	9606.ENSP00000359612	9606.ENSP00000263025	0	0	0	0	0.062	0	0.8	0.252	0.847
BCL10	AKT1	9606.ENSP00000359612	9606.ENSP00000451828	0	0	0	0	0	0.658	0	0.419	0.793
BCL10	MAPK8	9606.ENSP00000359612	9606.ENSP00000378974	0	0	0	0	0	0.182	0.8	0.261	0.868
BIN1	BIN2	9606.ENSP00000316779	9606.ENSP00000267012	0	0	0	0.831	0	0.74	0.9	0.878	0.976
BIN1	CD2AP	9606.ENSP00000316779	9606.ENSP00000352264	0	0	0	0	0	0	0	0.834	0.834
BIN1	MYC	9606.ENSP00000316779	9606.ENSP00000479618	0	0	0	0	0.066	0.962	0	0.988	0.999
BIN2	FYB	9606.ENSP00000267012	9606.ENSP00000427114	0	0	0	0	0.568	0	0	0.337	0.701
BIN2	BIN1	9606.ENSP00000267012	9606.ENSP00000316779	0	0	0	0.831	0	0.74	0.9	0.878	0.976
BMP2K	DBNL	9606.ENSP00000334836	9606.ENSP00000417653	0	0	0	0	0.072	0.604	0	0.38	0.752
BMP2K	REPS1	9606.ENSP00000334836	9606.ENSP00000392065	0	0	0	0	0	0.749	0	0.656	0.91
BNIP2	SPAG9	9606.ENSP00000267859	9606.ENSP00000262013	0	0	0	0	0.062	0	0.6	0.544	0.814
BNIP2	AKAP13	9606.ENSP00000267859	9606.ENSP00000354718	0	0	0	0	0	0	0	0.748	0.748
BNIP2	ARHGAP1	9606.ENSP00000267859	9606.ENSP00000310491	0	0	0	0.659	0	0.779	0	0.826	0.84
CANX	TMX1	9606.ENSP00000247461	9606.ENSP00000393316	0	0	0	0	0.218	0.429	0	0.553	0.784
CANX	HSP90AA1	9606.ENSP00000247461	9606.ENSP00000335153	0	0	0	0	0.215	0.284	0	0.735	0.838
CAST	PXN	9606.ENSP00000379157	9606.ENSP00000267257	0	0	0	0	0.062	0	0.9	0.213	0.919
CBX1	CBX5	9606.ENSP00000377060	9606.ENSP00000209875	0	0	0	0.96	0.13	0.75	0	0.892	0.781
CBX1	TRIM28	9606.ENSP00000377060	9606.ENSP00000253024	0	0	0	0	0.062	0.898	0.9	0.864	0.998
CBX1	POGZ	9606.ENSP00000377060	9606.ENSP00000271715	0	0	0	0	0.062	0.92	0	0.518	0.961
CBX1	HIST1H1E	9606.ENSP00000377060	9606.ENSP00000307705	0	0	0	0	0.059	0.463	0	0.453	0.7
CBX1	CBX3	9606.ENSP00000377060	9606.ENSP00000336687	0	0	0	0.967	0.068	0.81	0	0.87	0.82
CBX1	LBR	9606.ENSP00000377060	9606.ENSP00000339883	0	0	0	0	0.074	0.289	0	0.644	0.745
CBX1	CHD4	9606.ENSP00000377060	9606.ENSP00000349508	0	0	0	0	0.069	0.869	0	0.448	0.927
CBX1	DNMT1	9606.ENSP00000377060	9606.ENSP00000352516	0	0	0	0	0.062	0.428	0	0.512	0.715
CBX1	HDAC1	9606.ENSP00000377060	9606.ENSP00000362649	0	0	0	0	0.076	0.216	0	0.656	0.73
CBX1	MECP2	9606.ENSP00000377060	9606.ENSP00000395535	0	0	0	0	0.062	0.27	0	0.677	0.759
CBX1	NUMA1	9606.ENSP00000377060	9606.ENSP00000377298	0	0	0	0	0.055	0	0	0.889	0.891
CBX1	HIST1H3A	9606.ENSP00000377060	9606.ENSP00000480826	0	0	0	0	0.053	0.967	0	0.207	0.974
CBX3	CBX5	9606.ENSP00000336687	9606.ENSP00000209875	0	0	0	0.958	0.085	0.87	0	0.914	0.88
CBX3	TRIM28	9606.ENSP00000336687	9606.ENSP00000253024	0	0	0	0	0.106	0.884	0	0.679	0.964
CBX3	SRSF1	9606.ENSP00000336687	9606.ENSP00000258962	0	0	0	0	0.344	0	0	0.71	0.802
CBX3	POGZ	9606.ENSP00000336687	9606.ENSP00000271715	0	0	0	0	0.075	0.782	0	0.177	0.82
CBX3	NIPBL	9606.ENSP00000336687	9606.ENSP00000282516	0	0	0	0	0.067	0.736	0	0.631	0.901
CBX3	HIST1H1E	9606.ENSP00000336687	9606.ENSP00000307705	0	0	0	0	0.053	0.971	0	0.322	0.98
CBX3	LBR	9606.ENSP00000336687	9606.ENSP00000339883	0	0	0	0	0.13	0.289	0	0.627	0.75
CBX3	CBX1	9606.ENSP00000336687	9606.ENSP00000377060	0	0	0	0.967	0.068	0.81	0	0.87	0.82
CBX3	HDAC2	9606.ENSP00000336687	9606.ENSP00000430432	0	0	0	0	0.149	0.287	0.65	0.447	0.867
CBX3	HDAC1	9606.ENSP00000336687	9606.ENSP00000362649	0	0	0	0	0.146	0.216	0.65	0.595	0.892
CBX3	CHD4	9606.ENSP00000336687	9606.ENSP00000349508	0	0	0	0	0.196	0.724	0.65	0.478	0.954
CBX3	HIST1H3A	9606.ENSP00000336687	9606.ENSP00000480826	0	0	0	0	0.048	0.967	0	0.147	0.971
CBX5	HIST1H1E	9606.ENSP00000209875	9606.ENSP00000307705	0	0	0	0	0	0.359	0	0.579	0.719
CBX5	MECP2	9606.ENSP00000209875	9606.ENSP00000395535	0	0	0	0	0.062	0.486	0	0.471	0.722
CBX5	NIPBL	9606.ENSP00000209875	9606.ENSP00000282516	0	0	0	0	0.062	0.583	0	0.451	0.766
CBX5	HDAC1	9606.ENSP00000209875	9606.ENSP00000362649	0	0	0	0	0.246	0.216	0	0.642	0.77
CBX5	CBX1	9606.ENSP00000209875	9606.ENSP00000377060	0	0	0	0.96	0.13	0.75	0	0.892	0.781
CBX5	CHD4	9606.ENSP00000209875	9606.ENSP00000349508	0	0	0	0	0.079	0.687	0	0.344	0.794
CBX5	DNMT1	9606.ENSP00000209875	9606.ENSP00000352516	0	0	0	0	0.085	0.597	0	0.519	0.807
CBX5	CBX3	9606.ENSP00000209875	9606.ENSP00000336687	0	0	0	0.958	0.085	0.87	0	0.914	0.88
CBX5	SP100	9606.ENSP00000209875	9606.ENSP00000343023	0	0	0	0	0.062	0.877	0	0.232	0.904
CBX5	POGZ	9606.ENSP00000209875	9606.ENSP00000271715	0	0	0	0	0	0.799	0	0.607	0.917
CBX5	LBR	9606.ENSP00000209875	9606.ENSP00000339883	0	0	0	0	0.064	0.345	0	0.888	0.926
CBX5	HIST1H3A	9606.ENSP00000209875	9606.ENSP00000480826	0	0	0	0	0.048	0.955	0	0.322	0.968
CBX5	TRIM28	9606.ENSP00000209875	9606.ENSP00000253024	0	0	0	0	0.086	0.91	0	0.889	0.99
CCNK	CDK13	9606.ENSP00000374529	9606.ENSP00000181839	0	0	0	0	0.103	0.987	0.8	0.99	0.999
CCNK	IWS1	9606.ENSP00000374529	9606.ENSP00000295321	0	0	0	0	0.19	0	0.6	0.217	0.724
CCNK	NELFE	9606.ENSP00000374529	9606.ENSP00000364578	0	0	0	0	0.085	0	0.6	0.441	0.777
CCNK	POLR2A	9606.ENSP00000374529	9606.ENSP00000480158	0	0	0	0	0.21	0.742	0.6	0.741	0.976
CD2AP	BIN1	9606.ENSP00000352264	9606.ENSP00000316779	0	0	0	0	0	0	0	0.834	0.834
CD2AP	SH3KBP1	9606.ENSP00000352264	9606.ENSP00000380921	0	0	0	0.849	0	0.878	0	0.873	0.893
CDK13	POLR2A	9606.ENSP00000181839	9606.ENSP00000480158	0	0	0	0	0.1	0.757	0	0.645	0.915
CDK13	CCNK	9606.ENSP00000181839	9606.ENSP00000374529	0	0	0	0	0.103	0.987	0.8	0.99	0.999
CDK5RAP2	PCNT	9606.ENSP00000343818	9606.ENSP00000352572	0	0	0	0	0.152	0.919	0	0.99	0.999
CEP350	FGFR1OP	9606.ENSP00000356579	9606.ENSP00000355812	0	0	0	0	0	0.897	0	0.828	0.981
CFL1	VASP	9606.ENSP00000432660	9606.ENSP00000245932	0	0	0	0	0.088	0	0	0.702	0.717
CFL1	PXN	9606.ENSP00000432660	9606.ENSP00000267257	0	0	0	0	0.089	0.065	0	0.677	0.701
CFL1	DBN1	9606.ENSP00000432660	9606.ENSP00000292385	0	0	0	0	0.067	0.25	0	0.697	0.769
CFL1	TAGLN2	9606.ENSP00000432660	9606.ENSP00000357076	0	0	0	0	0.156	0.429	0	0.436	0.705
CFL1	FLNA	9606.ENSP00000432660	9606.ENSP00000358866	0	0	0	0	0.108	0.319	0	0.599	0.735
CFL1	DBNL	9606.ENSP00000432660	9606.ENSP00000417653	0	0	0	0	0.125	0.373	0	0.528	0.719
CFL1	AKT1	9606.ENSP00000432660	9606.ENSP00000451828	0	0	0	0	0.12	0.079	0	0.666	0.706
CHD4	CBX5	9606.ENSP00000349508	9606.ENSP00000209875	0	0	0	0	0.079	0.687	0	0.344	0.794
CHD4	TRIM28	9606.ENSP00000349508	9606.ENSP00000253024	0	0	0	0	0.33	0.494	0	0.335	0.755
CHD4	SMARCC1	9606.ENSP00000349508	9606.ENSP00000254480	0	0	0	0	0.411	0.872	0	0.497	0.959
CHD4	EP300	9606.ENSP00000349508	9606.ENSP00000263253	0	0	0	0	0.064	0.65	0.9	0.642	0.986
CHD4	SMARCC2	9606.ENSP00000349508	9606.ENSP00000267064	0	0	0	0	0.233	0.423	0	0.434	0.728
CHD4	PML	9606.ENSP00000349508	9606.ENSP00000268058	0	0	0	0	0	0.282	0.9	0.076	0.927
CHD4	IKZF1	9606.ENSP00000349508	9606.ENSP00000331614	0	0	0	0	0	0.87	0	0.969	0.995
CHD4	CBX3	9606.ENSP00000349508	9606.ENSP00000336687	0	0	0	0	0.196	0.724	0.65	0.478	0.954
CHD4	IKZF3	9606.ENSP00000349508	9606.ENSP00000344544	0	0	0	0	0	0.52	0	0.663	0.831
CHD4	DNMT1	9606.ENSP00000349508	9606.ENSP00000352516	0.053	0	0	0	0.116	0.486	0	0.448	0.731
CHD4	CBX1	9606.ENSP00000349508	9606.ENSP00000377060	0	0	0	0	0.069	0.869	0	0.448	0.927
CHD4	HIST1H3A	9606.ENSP00000349508	9606.ENSP00000480826	0	0	0	0	0	0.963	0	0.157	0.968
CHD4	HDAC2	9606.ENSP00000349508	9606.ENSP00000430432	0	0	0	0	0.187	0.936	0.9	0.972	0.999
CHD4	HDAC1	9606.ENSP00000349508	9606.ENSP00000362649	0	0	0	0	0.443	0.943	0.9	0.99	0.999
CLINT1	REPS1	9606.ENSP00000429824	9606.ENSP00000392065	0	0	0	0	0.049	0.477	0.54	0.047	0.752
COBLL1	PACSIN1	9606.ENSP00000341360	9606.ENSP00000484060	0	0	0	0	0	0.68	0	0.367	0.789
CRTC2	PRKAB1	9606.ENSP00000357622	9606.ENSP00000229328	0	0	0	0	0	0	0.8	0.211	0.835
CRTC2	EP300	9606.ENSP00000357622	9606.ENSP00000263253	0	0	0	0	0.054	0.27	0.8	0.565	0.932
CRTC2	AKT1	9606.ENSP00000357622	9606.ENSP00000451828	0	0	0	0	0.069	0.058	0.8	0.424	0.885
CSTF2	SRSF1	9606.ENSP00000362063	9606.ENSP00000258962	0	0	0	0	0.128	0	0.6	0.402	0.773
CSTF2	RBM25	9606.ENSP00000362063	9606.ENSP00000261973	0	0	0	0.55	0.325	0.653	0	0.178	0.771
CSTF2	SRRM1	9606.ENSP00000362063	9606.ENSP00000326261	0	0	0	0	0.262	0.288	0.6	0.234	0.817
CSTF2	POLR2A	9606.ENSP00000362063	9606.ENSP00000480158	0	0	0	0	0.116	0.379	0	0.504	0.704
CSTF2	XRN2	9606.ENSP00000362063	9606.ENSP00000366396	0	0	0	0	0.153	0.14	0	0.633	0.709
CSTF2	SRSF2	9606.ENSP00000362063	9606.ENSP00000376276	0	0	0	0	0.318	0.255	0.6	0.369	0.854
DBN1	FLNA	9606.ENSP00000292385	9606.ENSP00000358866	0	0	0	0	0.064	0.561	0	0.352	0.711
DBN1	SPTBN1	9606.ENSP00000292385	9606.ENSP00000349259	0	0	0	0	0.062	0.725	0	0.128	0.755
DBN1	CFL1	9606.ENSP00000292385	9606.ENSP00000432660	0	0	0	0	0.067	0.25	0	0.697	0.769
DBN1	PPP1R9B	9606.ENSP00000292385	9606.ENSP00000478767	0	0	0	0	0.062	0.427	0	0.642	0.791
DBNL	BMP2K	9606.ENSP00000417653	9606.ENSP00000334836	0	0	0	0	0.072	0.604	0	0.38	0.752
DBNL	LCP1	9606.ENSP00000417653	9606.ENSP00000381581	0	0	0	0	0.085	0.567	0	0.439	0.758
DBNL	AAK1	9606.ENSP00000417653	9606.ENSP00000386456	0	0	0	0	0.072	0.604	0	0.38	0.752
DBNL	CFL1	9606.ENSP00000417653	9606.ENSP00000432660	0	0	0	0	0.125	0.373	0	0.528	0.719
DBNL	MAP4K1	9606.ENSP00000417653	9606.ENSP00000465039	0	0	0	0	0	0.27	0.9	0.925	0.994
DEK	EP300	9606.ENSP00000380414	9606.ENSP00000263253	0	0	0	0	0.062	0.27	0.6	0.303	0.783
DEK	SRRM1	9606.ENSP00000380414	9606.ENSP00000326261	0	0	0	0	0.184	0.27	0	0.886	0.926
DEK	HDAC2	9606.ENSP00000380414	9606.ENSP00000430432	0	0	0	0	0.582	0.27	0	0.457	0.82
DENND1B	AKT1	9606.ENSP00000479816	9606.ENSP00000451828	0	0	0	0	0	0	0.9	0	0.9
DENR	EIF5	9606.ENSP00000280557	9606.ENSP00000216554	0	0	0	0	0.145	0.369	0	0.516	0.716
DIDO1	POLR2A	9606.ENSP00000266070	9606.ENSP00000480158	0	0	0	0	0.215	0.722	0	0.287	0.83
DIDO1	HIST1H3A	9606.ENSP00000266070	9606.ENSP00000480826	0	0	0	0	0	0.874	0	0.141	0.887
DKC1	FKBP15	9606.ENSP00000358563	9606.ENSP00000238256	0	0	0	0	0.743	0.173	0	0	0.778
DKC1	MPHOSPH10	9606.ENSP00000358563	9606.ENSP00000244230	0	0	0	0	0.834	0.684	0.72	0.277	0.988
DKC1	NSUN2	9606.ENSP00000358563	9606.ENSP00000264670	0.071	0	0	0	0.831	0	0	0.389	0.896
DKC1	HNRNPU	9606.ENSP00000358563	9606.ENSP00000283179	0	0	0	0	0.184	0	0.72	0.048	0.763
DKC1	PA2G4	9606.ENSP00000358563	9606.ENSP00000302886	0	0	0	0	0.67	0.056	0	0.125	0.703
DKC1	RAD9A	9606.ENSP00000358563	9606.ENSP00000311360	0	0	0	0	0.062	0	0.9	0	0.902
DKC1	KRI1	9606.ENSP00000358563	9606.ENSP00000320917	0	0	0	0	0.786	0.369	0	0.323	0.9
DKC1	HSP90AA1	9606.ENSP00000358563	9606.ENSP00000335153	0	0	0	0	0.114	0.077	0.9	0.615	0.964
DKC1	EIF3B	9606.ENSP00000358563	9606.ENSP00000354125	0	0	0	0	0.836	0.369	0	0.128	0.902
DKC1	PWP1	9606.ENSP00000358563	9606.ENSP00000387365	0	0	0	0	0.861	0.255	0	0.066	0.894
DKC1	AKT1	9606.ENSP00000358563	9606.ENSP00000451828	0	0	0	0	0	0.089	0.9	0.148	0.915
DKC1	PTGES3	9606.ENSP00000358563	9606.ENSP00000482075	0	0	0	0	0.143	0.299	0.9	0.18	0.944
DNMT1	CBX5	9606.ENSP00000352516	9606.ENSP00000209875	0	0	0	0	0.085	0.597	0	0.519	0.807
DNMT1	TRIM28	9606.ENSP00000352516	9606.ENSP00000253024	0	0	0	0	0.142	0.682	0	0.844	0.953
DNMT1	HSP90AA1	9606.ENSP00000352516	9606.ENSP00000335153	0.111	0	0	0	0.081	0	0	0.974	0.977
DNMT1	USP7	9606.ENSP00000352516	9606.ENSP00000343535	0	0	0	0	0.063	0.977	0	0.988	0.999
DNMT1	CHD4	9606.ENSP00000352516	9606.ENSP00000349508	0.053	0	0	0	0.116	0.486	0	0.448	0.731
DNMT1	CBX1	9606.ENSP00000352516	9606.ENSP00000377060	0	0	0	0	0.062	0.428	0	0.512	0.715
DNMT1	MCM3	9606.ENSP00000352516	9606.ENSP00000480987	0	0	0	0	0.706	0	0	0.134	0.734
DNMT1	MYC	9606.ENSP00000352516	9606.ENSP00000479618	0	0	0	0	0.085	0.128	0	0.734	0.77
DNMT1	RBL1	9606.ENSP00000352516	9606.ENSP00000362768	0	0	0	0	0.092	0.731	0	0.274	0.807
DNMT1	MECP2	9606.ENSP00000352516	9606.ENSP00000395535	0	0	0	0	0	0.317	0	0.989	0.993
DNMT1	HDAC2	9606.ENSP00000352516	9606.ENSP00000430432	0	0	0	0	0.062	0.846	0.8	0.992	0.999
DNMT1	HDAC1	9606.ENSP00000352516	9606.ENSP00000362649	0	0	0	0	0.188	0.903	0.9	0.993	0.999
DOCK2	IKZF1	9606.ENSP00000256935	9606.ENSP00000331614	0	0	0	0	0.681	0	0	0.117	0.706
DOCK2	PTPRC	9606.ENSP00000256935	9606.ENSP00000411355	0	0	0	0	0.734	0	0	0.227	0.786
DOCK2	AKT1	9606.ENSP00000256935	9606.ENSP00000451828	0	0	0	0	0	0.057	0	0.918	0.92
DOCK8	PTPRC	9606.ENSP00000394888	9606.ENSP00000411355	0	0	0	0	0.628	0	0	0.255	0.711
DPF2	SMARCC1	9606.ENSP00000436901	9606.ENSP00000254480	0	0	0	0	0.123	0.897	0.54	0.84	0.992
DPF2	SMARCC2	9606.ENSP00000436901	9606.ENSP00000267064	0	0	0	0	0.123	0.972	0.54	0.721	0.996
E4F1	HDAC1	9606.ENSP00000301727	9606.ENSP00000362649	0	0	0	0	0	0.578	0	0.459	0.762
EEF1D	RPS3	9606.ENSP00000410059	9606.ENSP00000278572	0.153	0	0	0	0.816	0.758	0	0.169	0.964
EEF1D	RPLP1	9606.ENSP00000410059	9606.ENSP00000346037	0.045	0	0	0	0.838	0.656	0	0.119	0.947
EEF1D	RPLP0	9606.ENSP00000410059	9606.ENSP00000449328	0.042	0	0	0	0.809	0.788	0	0.249	0.967
EIF2B5	EIF5	9606.ENSP00000273783	9606.ENSP00000216554	0	0	0	0	0.091	0.38	0	0.854	0.91
EIF3B	PSMA3	9606.ENSP00000354125	9606.ENSP00000216455	0	0	0	0	0.73	0	0	0	0.73
EIF3B	EIF5	9606.ENSP00000354125	9606.ENSP00000216554	0	0	0	0	0.569	0.97	0.6	0.879	0.999
EIF3B	NSUN2	9606.ENSP00000354125	9606.ENSP00000264670	0	0	0	0	0.827	0	0	0.15	0.847
EIF3B	RPS3	9606.ENSP00000354125	9606.ENSP00000278572	0	0	0	0	0.781	0.686	0.6	0.684	0.99
EIF3B	PA2G4	9606.ENSP00000354125	9606.ENSP00000302886	0	0	0	0	0.848	0.067	0	0.066	0.856
EIF3B	EIF4G2	9606.ENSP00000354125	9606.ENSP00000433664	0	0	0	0	0.452	0.128	0	0.606	0.795
EIF3B	RPLP0	9606.ENSP00000354125	9606.ENSP00000449328	0	0	0	0	0.802	0	0	0.235	0.842
EIF3B	EIF4G3	9606.ENSP00000354125	9606.ENSP00000383274	0	0	0	0	0.427	0.37	0	0.654	0.864
EIF3B	DKC1	9606.ENSP00000354125	9606.ENSP00000358563	0	0	0	0	0.836	0.369	0	0.128	0.902
EIF4G2	EIF5	9606.ENSP00000433664	9606.ENSP00000216554	0	0	0	0	0.174	0.455	0	0.713	0.86
EIF4G2	EIF3B	9606.ENSP00000433664	9606.ENSP00000354125	0	0	0	0	0.452	0.128	0	0.606	0.795
EIF4G2	EIF4G3	9606.ENSP00000433664	9606.ENSP00000383274	0	0	0	0.653	0.093	0.854	0.9	0.708	0.989
EIF4G3	EIF5	9606.ENSP00000383274	9606.ENSP00000216554	0	0	0	0	0.138	0.344	0	0.591	0.748
EIF4G3	EIF3B	9606.ENSP00000383274	9606.ENSP00000354125	0	0	0	0	0.427	0.37	0	0.654	0.864
EIF4G3	EIF4G2	9606.ENSP00000383274	9606.ENSP00000433664	0	0	0	0.653	0.093	0.854	0.9	0.708	0.989
EIF5	DENR	9606.ENSP00000216554	9606.ENSP00000280557	0	0	0	0	0.145	0.369	0	0.516	0.716
EIF5	EIF4G3	9606.ENSP00000216554	9606.ENSP00000383274	0	0	0	0	0.138	0.344	0	0.591	0.748
EIF5	RPS3	9606.ENSP00000216554	9606.ENSP00000278572	0	0	0	0	0.242	0.577	0	0.524	0.834
EIF5	EIF4G2	9606.ENSP00000216554	9606.ENSP00000433664	0	0	0	0	0.174	0.455	0	0.713	0.86
EIF5	EIF2B5	9606.ENSP00000216554	9606.ENSP00000273783	0	0	0	0	0.091	0.38	0	0.854	0.91
EIF5	EIF3B	9606.ENSP00000216554	9606.ENSP00000354125	0	0	0	0	0.569	0.97	0.6	0.879	0.999
EML4	NPM1	9606.ENSP00000320663	9606.ENSP00000296930	0	0	0	0	0.066	0.07	0	0.684	0.702
EML4	HSP90AA1	9606.ENSP00000320663	9606.ENSP00000335153	0	0	0	0	0	0	0	0.707	0.707
ENSA	MINK1	9606.ENSP00000341743	9606.ENSP00000347427	0	0	0	0	0	0	0	0.871	0.872
EP300	NFKB1	9606.ENSP00000263253	9606.ENSP00000226574	0	0	0	0	0	0.873	0.9	0.438	0.992
EP300	MAPK14	9606.ENSP00000263253	9606.ENSP00000229795	0	0	0	0	0	0.525	0.9	0.323	0.965
EP300	MAPK3	9606.ENSP00000263253	9606.ENSP00000263025	0	0	0	0	0	0.114	0	0.69	0.714
EP300	DEK	9606.ENSP00000263253	9606.ENSP00000380414	0	0	0	0	0.062	0.27	0.6	0.303	0.783
EP300	USP7	9606.ENSP00000263253	9606.ENSP00000343535	0	0	0	0	0.122	0.092	0.6	0.403	0.784
EP300	THRAP3	9606.ENSP00000263253	9606.ENSP00000346634	0	0	0	0	0.065	0.129	0.8	0.087	0.831
EP300	TLE3	9606.ENSP00000263253	9606.ENSP00000452871	0	0	0	0	0.065	0	0.8	0.272	0.852
EP300	HNRNPU	9606.ENSP00000263253	9606.ENSP00000283179	0	0	0	0	0.062	0.27	0	0.82	0.866
EP300	YAP1	9606.ENSP00000263253	9606.ENSP00000478927	0	0	0	0	0.062	0.319	0	0.816	0.872
EP300	HMGN1	9606.ENSP00000263253	9606.ENSP00000370125	0	0	0	0	0	0.27	0.8	0.381	0.901
EP300	HIST1H1E	9606.ENSP00000263253	9606.ENSP00000307705	0	0	0	0	0	0.06	0.9	0.225	0.92
EP300	CRTC2	9606.ENSP00000263253	9606.ENSP00000357622	0	0	0	0	0.054	0.27	0.8	0.565	0.932
EP300	HIST1H3A	9606.ENSP00000263253	9606.ENSP00000480826	0	0	0	0	0	0.925	0	0.238	0.94
EP300	PML	9606.ENSP00000263253	9606.ENSP00000268058	0	0	0	0	0.057	0.226	0.9	0.306	0.942
EP300	ING4	9606.ENSP00000263253	9606.ENSP00000380024	0	0	0	0	0.067	0.317	0	0.922	0.946
EP300	MAPK8	9606.ENSP00000263253	9606.ENSP00000378974	0	0	0	0	0.062	0.27	0.9	0.343	0.949
EP300	SNIP1	9606.ENSP00000263253	9606.ENSP00000296215	0	0	0	0	0.064	0.345	0.9	0.515	0.966
EP300	NFATC2	9606.ENSP00000263253	9606.ENSP00000379330	0	0	0	0	0.062	0.429	0.9	0.471	0.967
EP300	POLR2A	9606.ENSP00000263253	9606.ENSP00000480158	0	0	0	0	0.111	0.555	0.9	0.427	0.974
EP300	MEF2C	9606.ENSP00000263253	9606.ENSP00000340874	0	0	0	0	0	0.538	0.9	0.596	0.979
EP300	CHD4	9606.ENSP00000263253	9606.ENSP00000349508	0	0	0	0	0.064	0.65	0.9	0.642	0.986
EP300	FOXO1	9606.ENSP00000263253	9606.ENSP00000368880	0	0	0	0	0.063	0.807	0.9	0.842	0.996
EP300	HDAC2	9606.ENSP00000263253	9606.ENSP00000430432	0	0	0	0	0.064	0.289	0.9	0.955	0.996
EP300	AKT1	9606.ENSP00000263253	9606.ENSP00000451828	0	0	0	0	0	0.885	0.9	0.903	0.998
EP300	HDAC1	9606.ENSP00000263253	9606.ENSP00000362649	0	0	0	0	0.064	0.9	0.9	0.983	0.999
EP300	NCOA1	9606.ENSP00000263253	9606.ENSP00000385216	0	0	0	0	0.062	0.779	0.9	0.962	0.999
EP300	NCOA3	9606.ENSP00000263253	9606.ENSP00000361066	0	0	0	0	0.065	0.893	0.9	0.982	0.999
EP300	IRF3	9606.ENSP00000263253	9606.ENSP00000471896	0	0	0	0	0	0.898	0.8	0.989	0.999
EP300	MYC	9606.ENSP00000263253	9606.ENSP00000479618	0	0	0	0	0.062	0.78	0.9	0.987	0.999
EPB41L2	NUMA1	9606.ENSP00000338481	9606.ENSP00000377298	0	0	0	0	0	0.27	0	0.662	0.743
EPB41L2	SPTBN1	9606.ENSP00000338481	9606.ENSP00000349259	0	0	0	0	0.183	0.176	0.72	0.221	0.833
EPB41L2	SPTAN1	9606.ENSP00000338481	9606.ENSP00000361824	0	0	0	0	0.174	0.296	0.72	0.341	0.878
EPB41L3	SPTAN1	9606.ENSP00000343158	9606.ENSP00000361824	0	0	0	0	0.158	0.125	0	0.84	0.872
EPB41L3	SPTBN1	9606.ENSP00000343158	9606.ENSP00000349259	0	0	0	0	0.157	0.317	0	0.879	0.925
ERBB2IP	STUB1	9606.ENSP00000426632	9606.ENSP00000219548	0	0	0	0	0	0.056	0.9	0	0.901
ERBB2IP	TMPO	9606.ENSP00000426632	9606.ENSP00000266732	0	0	0	0	0	0	0	0.72	0.72
ERBB2IP	HSP90AA1	9606.ENSP00000426632	9606.ENSP00000335153	0	0	0	0	0	0.281	0.6	0.103	0.719
ETV6	IKZF1	9606.ENSP00000379658	9606.ENSP00000331614	0	0	0	0	0.084	0.058	0	0.717	0.734
ETV6	MYO18A	9606.ENSP00000379658	9606.ENSP00000437073	0	0	0	0	0.052	0	0.6	0.553	0.815
EVI2B	PTPRC	9606.ENSP00000333779	9606.ENSP00000411355	0	0	0	0	0.742	0	0	0.196	0.784
EVL	VASP	9606.ENSP00000376652	9606.ENSP00000245932	0	0	0	0.912	0	0.871	0.8	0.798	0.974
EVL	ZYX	9606.ENSP00000376652	9606.ENSP00000324422	0	0	0	0	0.062	0.675	0	0.547	0.849
EVL	FYB	9606.ENSP00000376652	9606.ENSP00000427114	0	0	0	0	0.089	0.462	0.6	0.195	0.821
FAM129A	NPM1	9606.ENSP00000356481	9606.ENSP00000296930	0	0	0	0	0	0.27	0	0.826	0.867
FGFR1OP	MYO18A	9606.ENSP00000355812	9606.ENSP00000437073	0	0	0	0	0	0	0.5	0.649	0.816
FGFR1OP	CEP350	9606.ENSP00000355812	9606.ENSP00000356579	0	0	0	0	0	0.897	0	0.828	0.981
FKBP15	DKC1	9606.ENSP00000238256	9606.ENSP00000358563	0	0	0	0	0.743	0.173	0	0	0.778
FKBP15	PWP1	9606.ENSP00000238256	9606.ENSP00000387365	0	0	0	0	0.666	0.215	0	0.22	0.778
FKBP15	KRI1	9606.ENSP00000238256	9606.ENSP00000320917	0	0	0	0	0.824	0	0	0	0.824
FLNA	VCL	9606.ENSP00000358866	9606.ENSP00000211998	0	0	0	0	0.556	0.149	0.9	0.678	0.986
FLNA	MYH9	9606.ENSP00000358866	9606.ENSP00000216181	0	0	0	0	0.195	0.46	0	0.505	0.766
FLNA	DBN1	9606.ENSP00000358866	9606.ENSP00000292385	0	0	0	0	0.064	0.561	0	0.352	0.711
FLNA	TAGLN2	9606.ENSP00000358866	9606.ENSP00000357076	0	0	0	0	0.208	0.167	0.9	0.307	0.948
FLNA	CFL1	9606.ENSP00000358866	9606.ENSP00000432660	0	0	0	0	0.108	0.319	0	0.599	0.735
FLNA	ITGA4	9606.ENSP00000358866	9606.ENSP00000380227	0	0	0	0	0.065	0.294	0.6	0.176	0.753
FLNA	HSP90AB1	9606.ENSP00000358866	9606.ENSP00000360609	0	0	0	0	0.052	0.683	0	0.257	0.757
FLNA	MAPK8	9606.ENSP00000358866	9606.ENSP00000378974	0	0	0	0	0	0.059	0.9	0.199	0.918
FMNL1	AKT1	9606.ENSP00000329219	9606.ENSP00000451828	0	0	0	0	0.062	0.119	0	0.703	0.733
FN1	VCL	9606.ENSP00000346839	9606.ENSP00000211998	0	0	0	0	0.086	0.074	0.5	0.966	0.984
FN1	MAPK3	9606.ENSP00000346839	9606.ENSP00000263025	0	0	0	0	0	0	0.6	0.718	0.882
FN1	PXN	9606.ENSP00000346839	9606.ENSP00000267257	0	0	0	0	0.062	0.247	0.9	0.962	0.996
FN1	ZYX	9606.ENSP00000346839	9606.ENSP00000324422	0	0	0	0	0.062	0.271	0	0.632	0.727
FN1	NES	9606.ENSP00000346839	9606.ENSP00000357206	0	0	0	0	0.199	0	0	0.647	0.705
FN1	PTPRC	9606.ENSP00000346839	9606.ENSP00000411355	0	0	0	0	0.062	0	0	0.711	0.718
FN1	AKT1	9606.ENSP00000346839	9606.ENSP00000451828	0	0	0	0	0.051	0	0	0.776	0.778
FN1	PRKAR1A	9606.ENSP00000346839	9606.ENSP00000376475	0	0	0	0	0	0	0.9	0.088	0.904
FN1	ITGA4	9606.ENSP00000346839	9606.ENSP00000380227	0	0	0	0	0.051	0.487	0.9	0.988	0.999
FNBP1	ABI1	9606.ENSP00000413625	9606.ENSP00000365312	0	0	0	0	0.062	0.21	0	0.757	0.804
FNBP1	TNKS1BP1	9606.ENSP00000413625	9606.ENSP00000437271	0	0	0	0	0	0	0	0.72	0.72
FOXO1	MAPK14	9606.ENSP00000368880	9606.ENSP00000229795	0	0	0	0	0	0.057	0.6	0.411	0.758
FOXO1	MAPK3	9606.ENSP00000368880	9606.ENSP00000263025	0	0	0	0	0	0.057	0.8	0.561	0.91
FOXO1	EP300	9606.ENSP00000368880	9606.ENSP00000263253	0	0	0	0	0.063	0.807	0.9	0.842	0.996
FOXO1	PML	9606.ENSP00000368880	9606.ENSP00000268058	0	0	0	0	0	0.281	0	0.948	0.961
FOXO1	USP7	9606.ENSP00000368880	9606.ENSP00000343535	0	0	0	0	0	0.057	0.8	0.27	0.85
FOXO1	STK4	9606.ENSP00000368880	9606.ENSP00000361892	0	0	0	0	0	0.27	0.8	0.369	0.899
FOXO1	HDAC1	9606.ENSP00000368880	9606.ENSP00000362649	0	0	0	0	0	0.142	0.6	0.406	0.778
FOXO1	HDAC2	9606.ENSP00000368880	9606.ENSP00000430432	0	0	0	0	0	0.142	0.6	0.484	0.807
FOXO1	MAPK8	9606.ENSP00000368880	9606.ENSP00000378974	0	0	0	0	0	0.104	0.8	0.464	0.895
FOXO1	MYC	9606.ENSP00000368880	9606.ENSP00000479618	0	0	0	0	0	0.056	0.9	0.61	0.959
FOXO1	AKT1	9606.ENSP00000368880	9606.ENSP00000451828	0	0	0	0	0.048	0.889	0.9	0.859	0.998
FYB	VASP	9606.ENSP00000427114	9606.ENSP00000245932	0	0	0	0	0.053	0.27	0.6	0.885	0.964
FYB	BIN2	9606.ENSP00000427114	9606.ENSP00000267012	0	0	0	0	0.568	0	0	0.337	0.701
FYB	EVL	9606.ENSP00000427114	9606.ENSP00000376652	0	0	0	0	0.089	0.462	0.6	0.195	0.821
FYB	PTPRC	9606.ENSP00000427114	9606.ENSP00000411355	0	0	0	0	0.777	0	0	0.298	0.837
GTF2I	HDAC1	9606.ENSP00000460070	9606.ENSP00000362649	0	0	0	0	0.104	0.27	0	0.633	0.739
GTF2I	HDAC2	9606.ENSP00000460070	9606.ENSP00000430432	0	0	0	0	0.066	0.659	0	0.44	0.806
GTF2I	MYC	9606.ENSP00000460070	9606.ENSP00000479618	0	0	0	0	0	0.452	0	0.829	0.902
HDAC1	CBX5	9606.ENSP00000362649	9606.ENSP00000209875	0	0	0	0	0.246	0.216	0	0.642	0.77
HDAC1	NFKB1	9606.ENSP00000362649	9606.ENSP00000226574	0	0	0	0	0.074	0.894	0	0.971	0.996
HDAC1	TRIM28	9606.ENSP00000362649	9606.ENSP00000253024	0	0	0	0	0.226	0.686	0.9	0.867	0.996
HDAC1	SMARCC1	9606.ENSP00000362649	9606.ENSP00000254480	0	0	0	0	0.393	0.625	0	0.542	0.886
HDAC1	EP300	9606.ENSP00000362649	9606.ENSP00000263253	0	0	0	0	0.064	0.9	0.9	0.983	0.999
HDAC1	PML	9606.ENSP00000362649	9606.ENSP00000268058	0	0	0	0	0.062	0.763	0.9	0.448	0.986
HDAC1	RANBP2	9606.ENSP00000362649	9606.ENSP00000283195	0	0	0	0	0.118	0.244	0.9	0.199	0.939
HDAC1	E4F1	9606.ENSP00000362649	9606.ENSP00000301727	0	0	0	0	0	0.578	0	0.459	0.762
HDAC1	IKZF1	9606.ENSP00000362649	9606.ENSP00000331614	0	0	0	0	0	0.772	0	0.882	0.972
HDAC1	HSP90AA1	9606.ENSP00000362649	9606.ENSP00000335153	0	0	0	0	0.072	0.059	0	0.76	0.773
HDAC1	CBX3	9606.ENSP00000362649	9606.ENSP00000336687	0	0	0	0	0.146	0.216	0.65	0.595	0.892
HDAC1	RERE	9606.ENSP00000362649	9606.ENSP00000338629	0	0	0	0	0	0.86	0	0.731	0.96
HDAC1	USP7	9606.ENSP00000362649	9606.ENSP00000343535	0	0	0	0	0.097	0.486	0	0.575	0.786
HDAC1	CHD4	9606.ENSP00000362649	9606.ENSP00000349508	0	0	0	0	0.443	0.943	0.9	0.99	0.999
HDAC1	DNMT1	9606.ENSP00000362649	9606.ENSP00000352516	0	0	0	0	0.188	0.903	0.9	0.993	0.999
HDAC1	SMC3	9606.ENSP00000362649	9606.ENSP00000354720	0.045	0	0	0	0.145	0.606	0	0.506	0.82
HDAC1	CBX1	9606.ENSP00000362649	9606.ENSP00000377060	0	0	0	0	0.076	0.216	0	0.656	0.73
HDAC1	GTF2I	9606.ENSP00000362649	9606.ENSP00000460070	0	0	0	0	0.104	0.27	0	0.633	0.739
HDAC1	HIST1H3A	9606.ENSP00000362649	9606.ENSP00000480826	0.044	0	0	0	0.049	0.685	0	0.268	0.763
HDAC1	FOXO1	9606.ENSP00000362649	9606.ENSP00000368880	0	0	0	0	0	0.142	0.6	0.406	0.778
HDAC1	NFATC2	9606.ENSP00000362649	9606.ENSP00000379330	0	0	0	0	0.047	0.129	0	0.895	0.906
HDAC1	TLE3	9606.ENSP00000362649	9606.ENSP00000452871	0	0	0	0	0.099	0.651	0.6	0.861	0.98
HDAC1	MYC	9606.ENSP00000362649	9606.ENSP00000479618	0	0	0	0	0.077	0.772	0	0.96	0.991
HDAC1	RBL1	9606.ENSP00000362649	9606.ENSP00000362768	0	0	0	0	0.064	0.597	0.9	0.968	0.998
HDAC1	MECP2	9606.ENSP00000362649	9606.ENSP00000395535	0	0	0	0	0	0.858	0.9	0.988	0.999
HDAC1	HDAC2	9606.ENSP00000362649	9606.ENSP00000430432	0	0	0.449	0.983	0.111	0.992	0.9	0.99	0.999
HDAC2	NFKB1	9606.ENSP00000430432	9606.ENSP00000226574	0	0	0	0	0.066	0.4	0.9	0.258	0.952
HDAC2	EP300	9606.ENSP00000430432	9606.ENSP00000263253	0	0	0	0	0.064	0.289	0.9	0.955	0.996
HDAC2	PML	9606.ENSP00000430432	9606.ENSP00000268058	0	0	0	0	0.062	0.839	0.9	0.171	0.985
HDAC2	PA2G4	9606.ENSP00000430432	9606.ENSP00000302886	0	0	0	0	0.097	0.192	0	0.732	0.788
HDAC2	IKZF1	9606.ENSP00000430432	9606.ENSP00000331614	0	0	0	0	0	0.875	0	0.295	0.908
HDAC2	CBX3	9606.ENSP00000430432	9606.ENSP00000336687	0	0	0	0	0.149	0.287	0.65	0.447	0.867
HDAC2	RERE	9606.ENSP00000430432	9606.ENSP00000338629	0	0	0	0	0	0.645	0	0.51	0.818
HDAC2	CHD4	9606.ENSP00000430432	9606.ENSP00000349508	0	0	0	0	0.187	0.936	0.9	0.972	0.999
HDAC2	DNMT1	9606.ENSP00000430432	9606.ENSP00000352516	0	0	0	0	0.062	0.846	0.8	0.992	0.999
HDAC2	SMC3	9606.ENSP00000430432	9606.ENSP00000354720	0.045	0	0	0	0.188	0.7	0	0.483	0.864
HDAC2	HDAC1	9606.ENSP00000430432	9606.ENSP00000362649	0	0	0.449	0.983	0.111	0.992	0.9	0.99	0.999
HDAC2	RBL1	9606.ENSP00000430432	9606.ENSP00000362768	0	0	0	0	0.064	0.428	0.9	0.269	0.955
HDAC2	FOXO1	9606.ENSP00000430432	9606.ENSP00000368880	0	0	0	0	0	0.142	0.6	0.484	0.807
HDAC2	DEK	9606.ENSP00000430432	9606.ENSP00000380414	0	0	0	0	0.582	0.27	0	0.457	0.82
HDAC2	MECP2	9606.ENSP00000430432	9606.ENSP00000395535	0	0	0	0	0	0.179	0.9	0.985	0.998
HDAC2	TLE3	9606.ENSP00000430432	9606.ENSP00000452871	0	0	0	0	0.073	0.344	0	0.603	0.737
HDAC2	MYC	9606.ENSP00000430432	9606.ENSP00000479618	0	0	0	0	0	0.462	0	0.57	0.759
HDAC2	HIST1H3A	9606.ENSP00000430432	9606.ENSP00000480826	0.044	0	0	0	0.049	0.733	0	0.206	0.781
HDAC2	GTF2I	9606.ENSP00000430432	9606.ENSP00000460070	0	0	0	0	0.066	0.659	0	0.44	0.806
HIST1H1A	HIST1H1D	9606.ENSP00000244573	9606.ENSP00000244534	0	0	0	0.952	0.237	0.678	0.3	0.936	0.821
HIST1H1A	HIST1H1E	9606.ENSP00000244573	9606.ENSP00000307705	0	0	0	0.961	0.238	0.646	0.3	0.828	0.801
HIST1H1A	HIST1H1C	9606.ENSP00000244573	9606.ENSP00000339566	0	0	0	0.954	0.171	0.678	0.3	0.931	0.805
HIST1H1A	HIST1H1B	9606.ENSP00000244573	9606.ENSP00000330074	0	0	0	0.95	0.276	0.678	0.3	0.99	0.831
HIST1H1B	HIST1H1A	9606.ENSP00000330074	9606.ENSP00000244573	0	0	0	0.95	0.276	0.678	0.3	0.99	0.831
HIST1H1B	HIST1H3A	9606.ENSP00000330074	9606.ENSP00000480826	0	0.002	0	0	0.248	0.325	0	0.479	0.713
HIST1H1C	HIST1H1A	9606.ENSP00000339566	9606.ENSP00000244573	0	0	0	0.954	0.171	0.678	0.3	0.931	0.805
HIST1H1D	HIST1H1E	9606.ENSP00000244534	9606.ENSP00000307705	0	0	0	0.978	0.651	0.129	0.3	0.883	0.773
HIST1H1D	HIST1H1A	9606.ENSP00000244534	9606.ENSP00000244573	0	0	0	0.952	0.237	0.678	0.3	0.936	0.821
HIST1H1E	CBX5	9606.ENSP00000307705	9606.ENSP00000209875	0	0	0	0	0	0.359	0	0.579	0.719
HIST1H1E	HIST1H1D	9606.ENSP00000307705	9606.ENSP00000244534	0	0	0	0.978	0.651	0.129	0.3	0.883	0.773
HIST1H1E	HIST1H1A	9606.ENSP00000307705	9606.ENSP00000244573	0	0	0	0.961	0.238	0.646	0.3	0.828	0.801
HIST1H1E	EP300	9606.ENSP00000307705	9606.ENSP00000263253	0	0	0	0	0	0.06	0.9	0.225	0.92
HIST1H1E	CBX1	9606.ENSP00000307705	9606.ENSP00000377060	0	0	0	0	0.059	0.463	0	0.453	0.7
HIST1H1E	HIST1H3A	9606.ENSP00000307705	9606.ENSP00000480826	0	0.002	0	0	0.253	0.858	0.36	0.415	0.955
HIST1H1E	CBX3	9606.ENSP00000307705	9606.ENSP00000336687	0	0	0	0	0.053	0.971	0	0.322	0.98
HIST1H3A	CBX5	9606.ENSP00000480826	9606.ENSP00000209875	0	0	0	0	0.048	0.955	0	0.322	0.968
HIST1H3A	EP300	9606.ENSP00000480826	9606.ENSP00000263253	0	0	0	0	0	0.925	0	0.238	0.94
HIST1H3A	DIDO1	9606.ENSP00000480826	9606.ENSP00000266070	0	0	0	0	0	0.874	0	0.141	0.887
HIST1H3A	NPM1	9606.ENSP00000480826	9606.ENSP00000296930	0	0	0	0	0	0.825	0	0.168	0.848
HIST1H3A	HIST1H1E	9606.ENSP00000480826	9606.ENSP00000307705	0	0.002	0	0	0.253	0.858	0.36	0.415	0.955
HIST1H3A	HIST1H1B	9606.ENSP00000480826	9606.ENSP00000330074	0	0.002	0	0	0.248	0.325	0	0.479	0.713
HIST1H3A	CBX3	9606.ENSP00000480826	9606.ENSP00000336687	0	0	0	0	0.048	0.967	0	0.147	0.971
HIST1H3A	SP100	9606.ENSP00000480826	9606.ENSP00000343023	0	0	0	0	0	0.821	0	0.043	0.821
HIST1H3A	CHD4	9606.ENSP00000480826	9606.ENSP00000349508	0	0	0	0	0	0.963	0	0.157	0.968
HIST1H3A	SET	9606.ENSP00000480826	9606.ENSP00000361777	0	0	0	0	0.062	0.721	0	0.134	0.754
HIST1H3A	HDAC1	9606.ENSP00000480826	9606.ENSP00000362649	0.044	0	0	0	0.049	0.685	0	0.268	0.763
HIST1H3A	TP53BP1	9606.ENSP00000480826	9606.ENSP00000371475	0	0	0	0	0	0.69	0	0.163	0.73
HIST1H3A	CBX1	9606.ENSP00000480826	9606.ENSP00000377060	0	0	0	0	0.053	0.967	0	0.207	0.974
HIST1H3A	ING4	9606.ENSP00000480826	9606.ENSP00000380024	0	0	0	0	0.062	0.944	0	0.107	0.95
HIST1H3A	HDAC2	9606.ENSP00000480826	9606.ENSP00000430432	0.044	0	0	0	0.049	0.733	0	0.206	0.781
HMGN1	EP300	9606.ENSP00000370125	9606.ENSP00000263253	0	0	0	0	0	0.27	0.8	0.381	0.901
HMGN1	USP7	9606.ENSP00000370125	9606.ENSP00000343535	0	0	0	0	0	0	0.6	0.31	0.712
HMGN1	POLR2A	9606.ENSP00000370125	9606.ENSP00000480158	0	0	0	0	0.055	0.27	0.6	0.155	0.735
HNRNPA1	PSMA3	9606.ENSP00000341826	9606.ENSP00000216455	0	0	0	0	0.463	0.494	0	0.063	0.723
HNRNPA1	SRSF1	9606.ENSP00000341826	9606.ENSP00000258962	0	0	0.297	0	0.953	0.347	0	0.839	0.996
HNRNPA1	HNRNPU	9606.ENSP00000341826	9606.ENSP00000283179	0	0	0	0	0.859	0.532	0.8	0.772	0.996
HNRNPA1	NPM1	9606.ENSP00000341826	9606.ENSP00000296930	0	0	0	0	0.4	0.343	0	0.31	0.704
HNRNPA1	HNRNPA3	9606.ENSP00000341826	9606.ENSP00000376309	0	0	0.429	0.972	0.738	0.282	0.8	0.739	0.96
HNRNPA1	HNRNPK	9606.ENSP00000341826	9606.ENSP00000365439	0	0	0	0	0.957	0.747	0.8	0.813	0.999
HNRNPA1	HNRNPH1	9606.ENSP00000341826	9606.ENSP00000349168	0	0	0	0	0.955	0.91	0.8	0.873	0.999
HNRNPA3	SRSF1	9606.ENSP00000376309	9606.ENSP00000258962	0	0	0.257	0	0.665	0.368	0	0.409	0.894
HNRNPA3	HNRNPU	9606.ENSP00000376309	9606.ENSP00000283179	0	0	0	0	0.42	0.431	0.8	0.564	0.967
HNRNPA3	HNRNPA1	9606.ENSP00000376309	9606.ENSP00000341826	0	0	0.429	0.972	0.738	0.282	0.8	0.739	0.96
HNRNPA3	HNRNPH1	9606.ENSP00000376309	9606.ENSP00000349168	0	0	0	0	0.674	0.766	0.8	0.65	0.993
HNRNPA3	HNRNPK	9606.ENSP00000376309	9606.ENSP00000365439	0	0	0	0	0.683	0.427	0.8	0.551	0.981
HNRNPH1	SRSF1	9606.ENSP00000349168	9606.ENSP00000258962	0	0	0	0	0.96	0.441	0	0.692	0.992
HNRNPH1	HNRNPU	9606.ENSP00000349168	9606.ENSP00000283179	0	0	0	0	0.863	0.506	0.8	0.676	0.995
HNRNPH1	HNRNPA1	9606.ENSP00000349168	9606.ENSP00000341826	0	0	0	0	0.955	0.91	0.8	0.873	0.999
HNRNPH1	HNRNPUL1	9606.ENSP00000349168	9606.ENSP00000375863	0	0	0	0	0.191	0.676	0	0.346	0.814
HNRNPH1	SRSF2	9606.ENSP00000349168	9606.ENSP00000376276	0	0	0	0	0.348	0.151	0	0.736	0.841
HNRNPH1	HNRNPA3	9606.ENSP00000349168	9606.ENSP00000376309	0	0	0	0	0.674	0.766	0.8	0.65	0.993
HNRNPH1	HNRNPK	9606.ENSP00000349168	9606.ENSP00000365439	0	0	0	0	0.981	0.691	0.8	0.671	0.999
HNRNPK	SRSF1	9606.ENSP00000365439	9606.ENSP00000258962	0	0	0	0	0.95	0.451	0	0.579	0.987
HNRNPK	KPNA3	9606.ENSP00000365439	9606.ENSP00000261667	0	0	0	0	0.065	0	0	0.72	0.727
HNRNPK	HNRNPU	9606.ENSP00000365439	9606.ENSP00000283179	0	0	0	0	0.81	0.581	0.8	0.702	0.994
HNRNPK	HNRNPA1	9606.ENSP00000365439	9606.ENSP00000341826	0	0	0	0	0.957	0.747	0.8	0.813	0.999
HNRNPK	HNRNPH1	9606.ENSP00000365439	9606.ENSP00000349168	0	0	0	0	0.981	0.691	0.8	0.671	0.999
HNRNPK	ABI1	9606.ENSP00000365439	9606.ENSP00000365312	0	0	0	0	0.112	0.104	0	0.937	0.946
HNRNPK	POLR2A	9606.ENSP00000365439	9606.ENSP00000480158	0	0	0	0	0.079	0.27	0.6	0.122	0.732
HNRNPK	HNRNPA3	9606.ENSP00000365439	9606.ENSP00000376309	0	0	0	0	0.683	0.427	0.8	0.551	0.981
HNRNPU	PIAS1	9606.ENSP00000283179	9606.ENSP00000249636	0	0	0	0	0.085	0	0	0.719	0.732
HNRNPU	SRSF1	9606.ENSP00000283179	9606.ENSP00000258962	0	0	0	0	0.764	0.221	0	0.51	0.902
HNRNPU	ACIN1	9606.ENSP00000283179	9606.ENSP00000262710	0	0	0	0	0.145	0	0	0.885	0.898
HNRNPU	EP300	9606.ENSP00000283179	9606.ENSP00000263253	0	0	0	0	0.062	0.27	0	0.82	0.866
HNRNPU	DKC1	9606.ENSP00000283179	9606.ENSP00000358563	0	0	0	0	0.184	0	0.72	0.048	0.763
HNRNPU	PTGES3	9606.ENSP00000283179	9606.ENSP00000482075	0	0	0	0	0.189	0	0.72	0	0.763
HNRNPU	NPM1	9606.ENSP00000283179	9606.ENSP00000296930	0	0	0	0	0.162	0.499	0	0.742	0.882
HNRNPU	POLR2A	9606.ENSP00000283179	9606.ENSP00000480158	0	0	0	0	0.076	0.85	0.6	0.057	0.94
HNRNPU	HNRNPA3	9606.ENSP00000283179	9606.ENSP00000376309	0	0	0	0	0.42	0.431	0.8	0.564	0.967
HNRNPU	HNRNPK	9606.ENSP00000283179	9606.ENSP00000365439	0	0	0	0	0.81	0.581	0.8	0.702	0.994
HNRNPU	HNRNPH1	9606.ENSP00000283179	9606.ENSP00000349168	0	0	0	0	0.863	0.506	0.8	0.676	0.995
HNRNPU	HNRNPA1	9606.ENSP00000283179	9606.ENSP00000341826	0	0	0	0	0.859	0.532	0.8	0.772	0.996
HNRNPUL1	HNRNPH1	9606.ENSP00000375863	9606.ENSP00000349168	0	0	0	0	0.191	0.676	0	0.346	0.814
HSP90AA1	PSMA3	9606.ENSP00000335153	9606.ENSP00000216455	0	0	0	0	0.759	0.282	0	0.333	0.874
HSP90AA1	STUB1	9606.ENSP00000335153	9606.ENSP00000219548	0	0	0	0	0.089	0.914	0.9	0.99	0.999
HSP90AA1	SGTA	9606.ENSP00000335153	9606.ENSP00000221566	0.047	0	0	0	0.127	0.661	0	0.907	0.97
HSP90AA1	CANX	9606.ENSP00000335153	9606.ENSP00000247461	0	0	0	0	0.215	0.284	0	0.735	0.838
HSP90AA1	HSPB1	9606.ENSP00000335153	9606.ENSP00000248553	0	0	0	0	0.065	0.347	0	0.949	0.966
HSP90AA1	PPIG	9606.ENSP00000335153	9606.ENSP00000260970	0	0	0	0	0.52	0.384	0	0.568	0.861
HSP90AA1	MAPK3	9606.ENSP00000335153	9606.ENSP00000263025	0	0	0	0	0.054	0.299	0.9	0.866	0.99
HSP90AA1	PXN	9606.ENSP00000335153	9606.ENSP00000267257	0	0	0	0	0	0	0.6	0.294	0.705
HSP90AA1	RPS3	9606.ENSP00000335153	9606.ENSP00000278572	0	0	0	0	0.305	0.281	0	0.913	0.953
HSP90AA1	NPM1	9606.ENSP00000335153	9606.ENSP00000296930	0	0	0	0	0.228	0.294	0	0.768	0.863
HSP90AA1	RAD9A	9606.ENSP00000335153	9606.ENSP00000311360	0	0	0	0	0	0	0.9	0.313	0.928
HSP90AA1	EML4	9606.ENSP00000335153	9606.ENSP00000320663	0	0	0	0	0	0	0	0.707	0.707
HSP90AA1	SP100	9606.ENSP00000335153	9606.ENSP00000343023	0	0	0	0	0	0	0	0.707	0.707
HSP90AA1	ERBB2IP	9606.ENSP00000335153	9606.ENSP00000426632	0	0	0	0	0	0.281	0.6	0.103	0.719
HSP90AA1	HDAC1	9606.ENSP00000335153	9606.ENSP00000362649	0	0	0	0	0.072	0.059	0	0.76	0.773
HSP90AA1	PCNT	9606.ENSP00000335153	9606.ENSP00000352572	0	0	0	0	0.047	0	0.8	0.123	0.818
HSP90AA1	IRF3	9606.ENSP00000335153	9606.ENSP00000471896	0	0	0	0	0.065	0.494	0	0.715	0.853
HSP90AA1	DKC1	9606.ENSP00000335153	9606.ENSP00000358563	0	0	0	0	0.114	0.077	0.9	0.615	0.964
HSP90AA1	DNMT1	9606.ENSP00000335153	9606.ENSP00000352516	0.111	0	0	0	0.081	0	0	0.974	0.977
HSP90AA1	MYC	9606.ENSP00000335153	9606.ENSP00000479618	0	0	0	0	0.048	0.679	0	0.953	0.984
HSP90AA1	HSP90AB1	9606.ENSP00000335153	9606.ENSP00000360609	0	0	0.449	0.984	0.781	0.888	0.8	0.883	0.994
HSP90AA1	AKT1	9606.ENSP00000335153	9606.ENSP00000451828	0	0	0	0	0.062	0.946	0.9	0.991	0.999
HSP90AA1	PTGES3	9606.ENSP00000335153	9606.ENSP00000482075	0	0	0	0	0.65	0.98	0.9	0.994	0.999
HSP90AB1	PSMA3	9606.ENSP00000360609	9606.ENSP00000216455	0	0	0	0	0.396	0.495	0	0.186	0.73
HSP90AB1	STUB1	9606.ENSP00000360609	9606.ENSP00000219548	0	0	0	0	0.082	0.684	0.54	0.736	0.96
HSP90AB1	HSPB1	9606.ENSP00000360609	9606.ENSP00000248553	0	0	0	0	0.065	0.143	0	0.728	0.763
HSP90AB1	PPIG	9606.ENSP00000360609	9606.ENSP00000260970	0	0	0	0	0.506	0.384	0	0.348	0.784
HSP90AB1	MAPK3	9606.ENSP00000360609	9606.ENSP00000263025	0	0	0	0	0.054	0.299	0.9	0.374	0.953
HSP90AB1	HSP90AA1	9606.ENSP00000360609	9606.ENSP00000335153	0	0	0.449	0.984	0.781	0.888	0.8	0.883	0.994
HSP90AB1	FLNA	9606.ENSP00000360609	9606.ENSP00000358866	0	0	0	0	0.052	0.683	0	0.257	0.757
HSP90AB1	AKT1	9606.ENSP00000360609	9606.ENSP00000451828	0	0	0	0	0.062	0.819	0.6	0.78	0.983
HSP90AB1	PTGES3	9606.ENSP00000360609	9606.ENSP00000482075	0	0	0	0	0.598	0.945	0.8	0.736	0.998
HSPB1	MAPK14	9606.ENSP00000248553	9606.ENSP00000229795	0	0	0	0	0	0.363	0.9	0.794	0.985
HSPB1	HSP90AB1	9606.ENSP00000248553	9606.ENSP00000360609	0	0	0	0	0.065	0.143	0	0.728	0.763
HSPB1	HSP90AA1	9606.ENSP00000248553	9606.ENSP00000335153	0	0	0	0	0.065	0.347	0	0.949	0.966
HSPB1	AKT1	9606.ENSP00000248553	9606.ENSP00000451828	0	0	0	0	0	0.76	0	0.982	0.995
HTATSF1	SLU7	9606.ENSP00000442699	9606.ENSP00000297151	0	0	0	0	0.123	0.392	0	0.588	0.761
HTATSF1	AP3D1	9606.ENSP00000442699	9606.ENSP00000347416	0	0	0	0	0	0.271	0	0.653	0.736
HTATSF1	POLR2A	9606.ENSP00000442699	9606.ENSP00000480158	0	0	0	0	0.059	0.462	0	0.59	0.774
IKZF1	DOCK2	9606.ENSP00000331614	9606.ENSP00000256935	0	0	0	0	0.681	0	0	0.117	0.706
IKZF1	ETV6	9606.ENSP00000331614	9606.ENSP00000379658	0	0	0	0	0.084	0.058	0	0.717	0.734
IKZF1	IKZF3	9606.ENSP00000331614	9606.ENSP00000344544	0	0	0	0.941	0.307	0.798	0	0.955	0.862
IKZF1	PTPRC	9606.ENSP00000331614	9606.ENSP00000411355	0	0	0	0	0.821	0.057	0	0.464	0.901
IKZF1	HDAC2	9606.ENSP00000331614	9606.ENSP00000430432	0	0	0	0	0	0.875	0	0.295	0.908
IKZF1	HDAC1	9606.ENSP00000331614	9606.ENSP00000362649	0	0	0	0	0	0.772	0	0.882	0.972
IKZF1	CHD4	9606.ENSP00000331614	9606.ENSP00000349508	0	0	0	0	0	0.87	0	0.969	0.995
IKZF3	MAPK3	9606.ENSP00000344544	9606.ENSP00000263025	0	0	0	0	0	0.133	0.9	0.068	0.912
IKZF3	IKZF1	9606.ENSP00000344544	9606.ENSP00000331614	0	0	0	0.941	0.307	0.798	0	0.955	0.862
IKZF3	CHD4	9606.ENSP00000344544	9606.ENSP00000349508	0	0	0	0	0	0.52	0	0.663	0.831
ING4	EP300	9606.ENSP00000380024	9606.ENSP00000263253	0	0	0	0	0.067	0.317	0	0.922	0.946
ING4	HIST1H3A	9606.ENSP00000380024	9606.ENSP00000480826	0	0	0	0	0.062	0.944	0	0.107	0.95
INPP5F	PI4K2A	9606.ENSP00000354519	9606.ENSP00000359665	0	0	0	0	0.063	0	0.8	0.249	0.847
IRF2BP1	IRF2BPL	9606.ENSP00000307265	9606.ENSP00000238647	0	0	0	0.917	0.047	0.786	0	0.747	0.8
IRF2BP1	VGLL4	9606.ENSP00000307265	9606.ENSP00000404251	0	0	0	0	0	0.69	0	0.277	0.766
IRF2BPL	VGLL4	9606.ENSP00000238647	9606.ENSP00000404251	0	0	0	0	0	0.723	0	0.126	0.747
IRF2BPL	IRF2BP1	9606.ENSP00000238647	9606.ENSP00000307265	0	0	0	0.917	0.047	0.786	0	0.747	0.8
IRF3	SMARCC1	9606.ENSP00000471896	9606.ENSP00000254480	0	0	0	0	0	0	0.9	0	0.9
IRF3	EP300	9606.ENSP00000471896	9606.ENSP00000263253	0	0	0	0	0	0.898	0.8	0.989	0.999
IRF3	SMARCC2	9606.ENSP00000471896	9606.ENSP00000267064	0	0	0	0	0.157	0	0.9	0	0.912
IRF3	HSP90AA1	9606.ENSP00000471896	9606.ENSP00000335153	0	0	0	0	0.065	0.494	0	0.715	0.853
IRF3	POLR2A	9606.ENSP00000471896	9606.ENSP00000480158	0	0	0	0	0.045	0.273	0.9	0.124	0.931
ITGA4	PXN	9606.ENSP00000380227	9606.ENSP00000267257	0	0	0	0	0.062	0.77	0.9	0.985	0.999
ITGA4	FN1	9606.ENSP00000380227	9606.ENSP00000346839	0	0	0	0	0.051	0.487	0.9	0.988	0.999
ITGA4	FLNA	9606.ENSP00000380227	9606.ENSP00000358866	0	0	0	0	0.065	0.294	0.6	0.176	0.753
ITGA4	ABI1	9606.ENSP00000380227	9606.ENSP00000365312	0	0	0	0	0	0.334	0.9	0.09	0.934
ITGA4	PRKAR1A	9606.ENSP00000380227	9606.ENSP00000376475	0	0	0	0	0.062	0.213	0.9	0	0.919
ITGA4	PTPRC	9606.ENSP00000380227	9606.ENSP00000411355	0	0	0	0	0.2	0.119	0	0.692	0.764
ITSN1	WNK1	9606.ENSP00000370719	9606.ENSP00000341292	0	0	0	0	0.062	0	0	0.789	0.793
ITSN1	AAK1	9606.ENSP00000370719	9606.ENSP00000386456	0	0	0	0	0.108	0.104	0.6	0.421	0.79
ITSN1	REPS1	9606.ENSP00000370719	9606.ENSP00000392065	0	0	0	0.55	0	0.27	0.6	0.88	0.815
IWS1	CCNK	9606.ENSP00000295321	9606.ENSP00000374529	0	0	0	0	0.19	0	0.6	0.217	0.724
IWS1	POLR2A	9606.ENSP00000295321	9606.ENSP00000480158	0	0	0	0	0.156	0.591	0.6	0.384	0.903
KPNA3	NFKB1	9606.ENSP00000261667	9606.ENSP00000226574	0	0	0	0	0	0.296	0.8	0.114	0.864
KPNA3	HNRNPK	9606.ENSP00000261667	9606.ENSP00000365439	0	0	0	0	0.065	0	0	0.72	0.727
KRI1	FKBP15	9606.ENSP00000320917	9606.ENSP00000238256	0	0	0	0	0.824	0	0	0	0.824
KRI1	MPHOSPH10	9606.ENSP00000320917	9606.ENSP00000244230	0	0	0	0	0.871	0.623	0.54	0.113	0.977
KRI1	SLU7	9606.ENSP00000320917	9606.ENSP00000297151	0	0	0	0	0.65	0	0	0.384	0.775
KRI1	PWP1	9606.ENSP00000320917	9606.ENSP00000387365	0	0	0	0	0.867	0	0	0	0.867
KRI1	DKC1	9606.ENSP00000320917	9606.ENSP00000358563	0	0	0	0	0.786	0.369	0	0.323	0.9
LAMTOR1	PRKAB1	9606.ENSP00000278671	9606.ENSP00000229328	0	0	0	0	0.219	0	0.9	0.128	0.926
LAMTOR1	AKT1S1	9606.ENSP00000278671	9606.ENSP00000375711	0	0	0	0	0.063	0	0.6	0.418	0.763
LAMTOR1	AKT1	9606.ENSP00000278671	9606.ENSP00000451828	0	0	0	0	0.048	0	0.9	0.26	0.923
LBR	CBX5	9606.ENSP00000339883	9606.ENSP00000209875	0	0	0	0	0.064	0.345	0	0.888	0.926
LBR	TMPO	9606.ENSP00000339883	9606.ENSP00000266732	0	0	0	0	0.209	0	0	0.696	0.749
LBR	CBX3	9606.ENSP00000339883	9606.ENSP00000336687	0	0	0	0	0.13	0.289	0	0.627	0.75
LBR	CBX1	9606.ENSP00000339883	9606.ENSP00000377060	0	0	0	0	0.074	0.289	0	0.644	0.745
LBR	MECP2	9606.ENSP00000339883	9606.ENSP00000395535	0	0	0	0	0	0.27	0.6	0.926	0.976
LCP1	DBNL	9606.ENSP00000381581	9606.ENSP00000417653	0	0	0	0	0.085	0.567	0	0.439	0.758
LSP1	MAPK14	9606.ENSP00000371194	9606.ENSP00000229795	0	0	0	0	0	0	0.9	0.098	0.905
LY9	PTPRC	9606.ENSP00000263285	9606.ENSP00000411355	0	0	0	0	0.683	0	0	0.408	0.804
MAP1B	STK4	9606.ENSP00000296755	9606.ENSP00000361892	0	0	0	0	0.146	0.69	0	0	0.724
MAP1B	ANP32A	9606.ENSP00000296755	9606.ENSP00000417864	0	0	0	0	0.062	0.298	0	0.888	0.92
MAP4K1	DBNL	9606.ENSP00000465039	9606.ENSP00000417653	0	0	0	0	0	0.27	0.9	0.925	0.994
MAP4K4	MINK1	9606.ENSP00000343658	9606.ENSP00000347427	0	0	0	0.963	0	0.153	0.9	0.601	0.913
MAP4K4	TNIK	9606.ENSP00000343658	9606.ENSP00000399511	0	0	0	0.969	0.273	0.103	0.9	0.681	0.93
MAPK14	NFKB1	9606.ENSP00000229795	9606.ENSP00000226574	0	0	0	0	0.065	0.134	0.9	0.463	0.95
MAPK14	FOXO1	9606.ENSP00000229795	9606.ENSP00000368880	0	0	0	0	0	0.057	0.6	0.411	0.758
MAPK14	MAPK8	9606.ENSP00000229795	9606.ENSP00000378974	0	0	0.396	0.924	0.066	0.47	0.6	0.814	0.803
MAPK14	LSP1	9606.ENSP00000229795	9606.ENSP00000371194	0	0	0	0	0	0	0.9	0.098	0.905
MAPK14	NFATC2	9606.ENSP00000229795	9606.ENSP00000379330	0	0	0	0	0	0	0.9	0.224	0.919
MAPK14	SPAG9	9606.ENSP00000229795	9606.ENSP00000262013	0	0	0	0	0	0.329	0.6	0.77	0.933
MAPK14	SLC9A1	9606.ENSP00000229795	9606.ENSP00000263980	0	0	0	0	0	0.267	0.9	0.205	0.936
MAPK14	MYC	9606.ENSP00000229795	9606.ENSP00000479618	0	0	0	0	0	0.129	0.9	0.52	0.954
MAPK14	AKT1	9606.ENSP00000229795	9606.ENSP00000451828	0	0	0.303	0.623	0.083	0.83	0.6	0.769	0.956
MAPK14	MAPK3	9606.ENSP00000229795	9606.ENSP00000263025	0	0	0.394	0.924	0.048	0.777	0.8	0.831	0.957
MAPK14	MEF2C	9606.ENSP00000229795	9606.ENSP00000340874	0	0	0	0	0.066	0.502	0.9	0.338	0.965
MAPK14	EP300	9606.ENSP00000229795	9606.ENSP00000263253	0	0	0	0	0	0.525	0.9	0.323	0.965
MAPK14	NCOA3	9606.ENSP00000229795	9606.ENSP00000361066	0	0	0	0	0	0.679	0.9	0.113	0.969
MAPK14	HSPB1	9606.ENSP00000229795	9606.ENSP00000248553	0	0	0	0	0	0.363	0.9	0.794	0.985
MAPK3	VCL	9606.ENSP00000263025	9606.ENSP00000211998	0	0	0	0	0	0.14	0.6	0.596	0.849
MAPK3	NFKB1	9606.ENSP00000263025	9606.ENSP00000226574	0	0	0	0	0	0.134	0.9	0.402	0.943
MAPK3	MAPK14	9606.ENSP00000263025	9606.ENSP00000229795	0	0	0.394	0.924	0.048	0.777	0.8	0.831	0.957
MAPK3	EP300	9606.ENSP00000263025	9606.ENSP00000263253	0	0	0	0	0	0.114	0	0.69	0.714
MAPK3	BCL10	9606.ENSP00000263025	9606.ENSP00000359612	0	0	0	0	0.062	0	0.8	0.252	0.847
MAPK3	NFATC2	9606.ENSP00000263025	9606.ENSP00000379330	0	0	0	0	0	0	0.8	0.286	0.851
MAPK3	FN1	9606.ENSP00000263025	9606.ENSP00000346839	0	0	0	0	0	0	0.6	0.718	0.882
MAPK3	SLC9A1	9606.ENSP00000263025	9606.ENSP00000263980	0	0	0	0	0.079	0.108	0.8	0.472	0.901
MAPK3	AKT1	9606.ENSP00000263025	9606.ENSP00000451828	0	0	0.323	0.586	0.066	0.148	0.8	0.938	0.906
MAPK3	FOXO1	9606.ENSP00000263025	9606.ENSP00000368880	0	0	0	0	0	0.057	0.8	0.561	0.91
MAPK3	IKZF3	9606.ENSP00000263025	9606.ENSP00000344544	0	0	0	0	0	0.133	0.9	0.068	0.912
MAPK3	PTGES3	9606.ENSP00000263025	9606.ENSP00000482075	0	0	0	0	0	0.076	0.9	0.145	0.914
MAPK3	ABI1	9606.ENSP00000263025	9606.ENSP00000365312	0	0	0	0	0.062	0	0.9	0.174	0.915
MAPK3	PRKAR1A	9606.ENSP00000263025	9606.ENSP00000376475	0	0	0	0	0.063	0.074	0.9	0.237	0.925
MAPK3	PRKAR2B	9606.ENSP00000263025	9606.ENSP00000265717	0	0	0	0	0.065	0.074	0.9	0.251	0.926
MAPK3	MAPK8	9606.ENSP00000263025	9606.ENSP00000378974	0	0	0.39	0.874	0.083	0.225	0.9	0.837	0.934
MAPK3	HSP90AB1	9606.ENSP00000263025	9606.ENSP00000360609	0	0	0	0	0.054	0.299	0.9	0.374	0.953
MAPK3	PXN	9606.ENSP00000263025	9606.ENSP00000267257	0	0	0	0	0.062	0.23	0.9	0.641	0.97
MAPK3	MYC	9606.ENSP00000263025	9606.ENSP00000479618	0	0	0	0	0	0.462	0.9	0.691	0.981
MAPK3	HSP90AA1	9606.ENSP00000263025	9606.ENSP00000335153	0	0	0	0	0.054	0.299	0.9	0.866	0.99
MAPK3	PEA15	9606.ENSP00000263025	9606.ENSP00000357055	0	0	0	0	0.063	0.683	0.6	0.975	0.996
MAPK8	NFKB1	9606.ENSP00000378974	9606.ENSP00000226574	0	0	0	0	0.068	0.102	0.8	0.493	0.903
MAPK8	MAPK14	9606.ENSP00000378974	9606.ENSP00000229795	0	0	0.396	0.924	0.066	0.47	0.6	0.814	0.803
MAPK8	SPAG9	9606.ENSP00000378974	9606.ENSP00000262013	0	0	0	0	0.062	0.372	0	0.704	0.811
MAPK8	MAPK3	9606.ENSP00000378974	9606.ENSP00000263025	0	0	0.39	0.874	0.083	0.225	0.9	0.837	0.934
MAPK8	EP300	9606.ENSP00000378974	9606.ENSP00000263253	0	0	0	0	0.062	0.27	0.9	0.343	0.949
MAPK8	PXN	9606.ENSP00000378974	9606.ENSP00000267257	0	0	0	0	0	0.738	0	0.408	0.838
MAPK8	FLNA	9606.ENSP00000378974	9606.ENSP00000358866	0	0	0	0	0	0.059	0.9	0.199	0.918
MAPK8	BCL10	9606.ENSP00000378974	9606.ENSP00000359612	0	0	0	0	0	0.182	0.8	0.261	0.868
MAPK8	NCOA3	9606.ENSP00000378974	9606.ENSP00000361066	0	0	0	0	0.052	0.27	0.8	0.12	0.861
MAPK8	FOXO1	9606.ENSP00000378974	9606.ENSP00000368880	0	0	0	0	0	0.104	0.8	0.464	0.895
MAPK8	MYC	9606.ENSP00000378974	9606.ENSP00000479618	0	0	0	0	0	0.462	0	0.562	0.754
MAPK8	NFATC2	9606.ENSP00000378974	9606.ENSP00000379330	0	0	0	0	0	0.358	0.9	0.279	0.949
MCM3	MSH6	9606.ENSP00000480987	9606.ENSP00000234420	0	0	0	0	0.768	0.056	0	0.312	0.836
MCM3	POLD3	9606.ENSP00000480987	9606.ENSP00000263681	0	0	0	0	0.287	0.61	0.72	0.637	0.968
MCM3	DNMT1	9606.ENSP00000480987	9606.ENSP00000352516	0	0	0	0	0.706	0	0	0.134	0.734
MCM3	SMC3	9606.ENSP00000480987	9606.ENSP00000354720	0	0	0	0	0.681	0	0	0.515	0.838
MCM3	RBL1	9606.ENSP00000480987	9606.ENSP00000362768	0	0	0	0	0.511	0	0	0.44	0.714
MCM3	TP53BP1	9606.ENSP00000480987	9606.ENSP00000371475	0	0	0	0	0.65	0.186	0	0.266	0.773
MECP2	CBX5	9606.ENSP00000395535	9606.ENSP00000209875	0	0	0	0	0.062	0.486	0	0.471	0.722
MECP2	LBR	9606.ENSP00000395535	9606.ENSP00000339883	0	0	0	0	0	0.27	0.6	0.926	0.976
MECP2	MEF2C	9606.ENSP00000395535	9606.ENSP00000340874	0	0	0	0	0.049	0	0.9	0.405	0.938
MECP2	DNMT1	9606.ENSP00000395535	9606.ENSP00000352516	0	0	0	0	0	0.317	0	0.989	0.993
MECP2	HDAC1	9606.ENSP00000395535	9606.ENSP00000362649	0	0	0	0	0	0.858	0.9	0.988	0.999
MECP2	CBX1	9606.ENSP00000395535	9606.ENSP00000377060	0	0	0	0	0.062	0.27	0	0.677	0.759
MECP2	HDAC2	9606.ENSP00000395535	9606.ENSP00000430432	0	0	0	0	0	0.179	0.9	0.985	0.998
MEF2C	MAPK14	9606.ENSP00000340874	9606.ENSP00000229795	0	0	0	0	0.066	0.502	0.9	0.338	0.965
MEF2C	EP300	9606.ENSP00000340874	9606.ENSP00000263253	0	0	0	0	0	0.538	0.9	0.596	0.979
MEF2C	POLR2A	9606.ENSP00000340874	9606.ENSP00000480158	0	0	0	0	0	0	0.9	0.1	0.906
MEF2C	MECP2	9606.ENSP00000340874	9606.ENSP00000395535	0	0	0	0	0.049	0	0.9	0.405	0.938
MEF2C	AKT1	9606.ENSP00000340874	9606.ENSP00000451828	0	0	0	0	0.049	0.076	0.9	0.428	0.943
MINK1	ENSA	9606.ENSP00000347427	9606.ENSP00000341743	0	0	0	0	0	0	0	0.871	0.872
MINK1	MAP4K4	9606.ENSP00000347427	9606.ENSP00000343658	0	0	0	0.963	0	0.153	0.9	0.601	0.913
MINK1	TNIK	9606.ENSP00000347427	9606.ENSP00000399511	0	0	0	0.964	0	0	0.9	0.6	0.902
MPHOSPH10	PPIG	9606.ENSP00000244230	9606.ENSP00000260970	0	0	0	0	0.818	0	0	0	0.818
MPHOSPH10	PWP1	9606.ENSP00000244230	9606.ENSP00000387365	0	0	0	0	0.863	0	0	0.124	0.874
MPHOSPH10	XRN2	9606.ENSP00000244230	9606.ENSP00000366396	0	0	0	0	0.15	0	0.9	0	0.911
MPHOSPH10	KRI1	9606.ENSP00000244230	9606.ENSP00000320917	0	0	0	0	0.871	0.623	0.54	0.113	0.977
MPHOSPH10	DKC1	9606.ENSP00000244230	9606.ENSP00000358563	0	0	0	0	0.834	0.684	0.72	0.277	0.988
MSH6	TP53BP1	9606.ENSP00000234420	9606.ENSP00000371475	0	0	0	0	0.212	0	0.36	0.464	0.706
MSH6	RAD9A	9606.ENSP00000234420	9606.ENSP00000311360	0	0	0	0	0.064	0.297	0	0.608	0.72
MSH6	MCM3	9606.ENSP00000234420	9606.ENSP00000480987	0	0	0	0	0.768	0.056	0	0.312	0.836
MSH6	SMC3	9606.ENSP00000234420	9606.ENSP00000354720	0	0	0	0	0.807	0.272	0	0.64	0.945
MYC	STUB1	9606.ENSP00000479618	9606.ENSP00000219548	0	0	0	0	0	0.675	0	0.715	0.903
MYC	MAPK14	9606.ENSP00000479618	9606.ENSP00000229795	0	0	0	0	0	0.129	0.9	0.52	0.954
MYC	MAPK3	9606.ENSP00000479618	9606.ENSP00000263025	0	0	0	0	0	0.462	0.9	0.691	0.981
MYC	EP300	9606.ENSP00000479618	9606.ENSP00000263253	0	0	0	0	0.062	0.78	0.9	0.987	0.999
MYC	TAF12	9606.ENSP00000479618	9606.ENSP00000263974	0	0	0	0	0	0.316	0.9	0.314	0.948
MYC	PML	9606.ENSP00000479618	9606.ENSP00000268058	0	0	0	0	0.06	0.626	0.9	0.324	0.973
MYC	NPM1	9606.ENSP00000479618	9606.ENSP00000296930	0	0	0	0	0.117	0.187	0	0.938	0.952
MYC	BIN1	9606.ENSP00000479618	9606.ENSP00000316779	0	0	0	0	0.066	0.962	0	0.988	0.999
MYC	HSP90AA1	9606.ENSP00000479618	9606.ENSP00000335153	0	0	0	0	0.048	0.679	0	0.953	0.984
MYC	DNMT1	9606.ENSP00000479618	9606.ENSP00000352516	0	0	0	0	0.085	0.128	0	0.734	0.77
MYC	SMC3	9606.ENSP00000479618	9606.ENSP00000354720	0	0	0	0	0	0.092	0.9	0.412	0.942
MYC	NCOA3	9606.ENSP00000479618	9606.ENSP00000361066	0	0	0	0	0	0	0.9	0.582	0.956
MYC	HDAC1	9606.ENSP00000479618	9606.ENSP00000362649	0	0	0	0	0.077	0.772	0	0.96	0.991
MYC	RBL1	9606.ENSP00000479618	9606.ENSP00000362768	0	0	0	0	0	0.27	0.9	0.938	0.995
MYC	FOXO1	9606.ENSP00000479618	9606.ENSP00000368880	0	0	0	0	0	0.056	0.9	0.61	0.959
MYC	MAPK8	9606.ENSP00000479618	9606.ENSP00000378974	0	0	0	0	0	0.462	0	0.562	0.754
MYC	HDAC2	9606.ENSP00000479618	9606.ENSP00000430432	0	0	0	0	0	0.462	0	0.57	0.759
MYC	AKT1	9606.ENSP00000479618	9606.ENSP00000451828	0	0	0	0	0.051	0.143	0.9	0.859	0.987
MYC	GTF2I	9606.ENSP00000479618	9606.ENSP00000460070	0	0	0	0	0	0.452	0	0.829	0.902
MYC	POLR2A	9606.ENSP00000479618	9606.ENSP00000480158	0	0	0	0	0.062	0.632	0	0.542	0.828
MYH11	VCL	9606.ENSP00000379616	9606.ENSP00000211998	0	0	0	0	0.064	0.154	0.6	0.462	0.807
MYH11	MYH9	9606.ENSP00000379616	9606.ENSP00000216181	0	0	0	0.979	0	0	0.9	0.446	0.9
MYH11	PXN	9606.ENSP00000379616	9606.ENSP00000267257	0	0	0	0	0.064	0.16	0.6	0.239	0.728
MYH11	PPP1R12A	9606.ENSP00000379616	9606.ENSP00000389168	0	0	0	0	0.049	0.169	0.9	0.361	0.942
MYH9	FLNA	9606.ENSP00000216181	9606.ENSP00000358866	0	0	0	0	0.195	0.46	0	0.505	0.766
MYH9	MYH11	9606.ENSP00000216181	9606.ENSP00000379616	0	0	0	0.979	0	0	0.9	0.446	0.9
MYH9	MYO9B	9606.ENSP00000216181	9606.ENSP00000471457	0	0	0	0.613	0.16	0.125	0.9	0.265	0.927
MYH9	PPP1R12A	9606.ENSP00000216181	9606.ENSP00000389168	0	0	0	0	0.062	0.246	0.9	0.324	0.945
MYO18A	SPTBN1	9606.ENSP00000437073	9606.ENSP00000349259	0	0	0	0	0.049	0.161	0.6	0.253	0.73
MYO18A	FGFR1OP	9606.ENSP00000437073	9606.ENSP00000355812	0	0	0	0	0	0	0.5	0.649	0.816
MYO18A	ETV6	9606.ENSP00000437073	9606.ENSP00000379658	0	0	0	0	0.052	0	0.6	0.553	0.815
MYO9B	MYH9	9606.ENSP00000471457	9606.ENSP00000216181	0	0	0	0.613	0.16	0.125	0.9	0.265	0.927
NCOA1	EP300	9606.ENSP00000385216	9606.ENSP00000263253	0	0	0	0	0.062	0.779	0.9	0.962	0.999
NCOA1	THRAP3	9606.ENSP00000385216	9606.ENSP00000346634	0	0	0	0	0	0	0.8	0.074	0.806
NCOA1	NCOA3	9606.ENSP00000385216	9606.ENSP00000361066	0	0	0	0.77	0.062	0.682	0.9	0.917	0.974
NCOA1	POLR2A	9606.ENSP00000385216	9606.ENSP00000480158	0	0	0	0	0	0	0.9	0	0.9
NCOA3	MAPK14	9606.ENSP00000361066	9606.ENSP00000229795	0	0	0	0	0	0.679	0.9	0.113	0.969
NCOA3	EP300	9606.ENSP00000361066	9606.ENSP00000263253	0	0	0	0	0.065	0.893	0.9	0.982	0.999
NCOA3	THRAP3	9606.ENSP00000361066	9606.ENSP00000346634	0	0	0	0	0.042	0	0.8	0.09	0.81
NCOA3	MAPK8	9606.ENSP00000361066	9606.ENSP00000378974	0	0	0	0	0.052	0.27	0.8	0.12	0.861
NCOA3	POLR2A	9606.ENSP00000361066	9606.ENSP00000480158	0	0	0	0	0.059	0	0.9	0.12	0.91
NCOA3	MYC	9606.ENSP00000361066	9606.ENSP00000479618	0	0	0	0	0	0	0.9	0.582	0.956
NCOA3	NCOA1	9606.ENSP00000361066	9606.ENSP00000385216	0	0	0	0.77	0.062	0.682	0.9	0.917	0.974
NELFE	CCNK	9606.ENSP00000364578	9606.ENSP00000374529	0	0	0	0	0.085	0	0.6	0.441	0.777
NELFE	POLR2A	9606.ENSP00000364578	9606.ENSP00000480158	0	0	0	0	0.082	0.903	0.6	0.529	0.981
NES	FN1	9606.ENSP00000357206	9606.ENSP00000346839	0	0	0	0	0.199	0	0	0.647	0.705
NFATC2	MAPK14	9606.ENSP00000379330	9606.ENSP00000229795	0	0	0	0	0	0	0.9	0.224	0.919
NFATC2	MAPK3	9606.ENSP00000379330	9606.ENSP00000263025	0	0	0	0	0	0	0.8	0.286	0.851
NFATC2	EP300	9606.ENSP00000379330	9606.ENSP00000263253	0	0	0	0	0.062	0.429	0.9	0.471	0.967
NFATC2	HDAC1	9606.ENSP00000379330	9606.ENSP00000362649	0	0	0	0	0.047	0.129	0	0.895	0.906
NFATC2	MAPK8	9606.ENSP00000379330	9606.ENSP00000378974	0	0	0	0	0	0.358	0.9	0.279	0.949
NFKB1	PSMA3	9606.ENSP00000226574	9606.ENSP00000216455	0	0	0	0	0.249	0.149	0.9	0.054	0.931
NFKB1	RPS3	9606.ENSP00000226574	9606.ENSP00000278572	0	0	0	0	0.123	0.721	0	0.182	0.782
NFKB1	BCL10	9606.ENSP00000226574	9606.ENSP00000359612	0	0	0	0	0.065	0.057	0.65	0.388	0.786
NFKB1	TNIP1	9606.ENSP00000226574	9606.ENSP00000317891	0	0	0	0	0.149	0.68	0	0.472	0.843
NFKB1	KPNA3	9606.ENSP00000226574	9606.ENSP00000261667	0	0	0	0	0	0.296	0.8	0.114	0.864
NFKB1	MAPK8	9606.ENSP00000226574	9606.ENSP00000378974	0	0	0	0	0.068	0.102	0.8	0.493	0.903
NFKB1	POU2F2	9606.ENSP00000226574	9606.ENSP00000431603	0	0	0	0	0	0.058	0.9	0.18	0.916
NFKB1	MAPK3	9606.ENSP00000226574	9606.ENSP00000263025	0	0	0	0	0	0.134	0.9	0.402	0.943
NFKB1	MAPK14	9606.ENSP00000226574	9606.ENSP00000229795	0	0	0	0	0.065	0.134	0.9	0.463	0.95
NFKB1	HDAC2	9606.ENSP00000226574	9606.ENSP00000430432	0	0	0	0	0.066	0.4	0.9	0.258	0.952
NFKB1	AKT1	9606.ENSP00000226574	9606.ENSP00000451828	0	0	0	0	0.066	0.176	0.9	0.526	0.958
NFKB1	EP300	9606.ENSP00000226574	9606.ENSP00000263253	0	0	0	0	0	0.873	0.9	0.438	0.992
NFKB1	HDAC1	9606.ENSP00000226574	9606.ENSP00000362649	0	0	0	0	0.074	0.894	0	0.971	0.996
NIPBL	CBX5	9606.ENSP00000282516	9606.ENSP00000209875	0	0	0	0	0.062	0.583	0	0.451	0.766
NIPBL	ZNF609	9606.ENSP00000282516	9606.ENSP00000316527	0	0	0	0	0.062	0	0.72	0.141	0.754
NIPBL	CBX3	9606.ENSP00000282516	9606.ENSP00000336687	0	0	0	0	0.067	0.736	0	0.631	0.901
NIPBL	PDS5B	9606.ENSP00000282516	9606.ENSP00000313851	0	0	0	0	0.653	0.7	0.6	0.808	0.99
NIPBL	SMC3	9606.ENSP00000282516	9606.ENSP00000354720	0	0	0	0	0.68	0.989	0.6	0.95	0.999
NPM1	SRSF1	9606.ENSP00000296930	9606.ENSP00000258962	0	0	0	0	0.173	0.664	0	0.224	0.766
NPM1	NSUN2	9606.ENSP00000296930	9606.ENSP00000264670	0	0	0	0	0.1	0.468	0.9	0.826	0.99
NPM1	HNRNPU	9606.ENSP00000296930	9606.ENSP00000283179	0	0	0	0	0.162	0.499	0	0.742	0.882
NPM1	RANBP2	9606.ENSP00000296930	9606.ENSP00000283195	0	0	0	0	0.166	0.057	0.6	0.348	0.767
NPM1	EML4	9606.ENSP00000296930	9606.ENSP00000320663	0	0	0	0	0.066	0.07	0	0.684	0.702
NPM1	HNRNPA1	9606.ENSP00000296930	9606.ENSP00000341826	0	0	0	0	0.4	0.343	0	0.31	0.704
NPM1	SRSF2	9606.ENSP00000296930	9606.ENSP00000376276	0	0	0	0	0.149	0.152	0	0.657	0.73
NPM1	SET	9606.ENSP00000296930	9606.ENSP00000361777	0	0	0	0	0.656	0	0	0.308	0.752
NPM1	NUMA1	9606.ENSP00000296930	9606.ENSP00000377298	0	0	0	0	0.049	0.27	0	0.7	0.773
NPM1	AKT1	9606.ENSP00000296930	9606.ENSP00000451828	0	0	0	0	0	0.285	0	0.714	0.788
NPM1	HIST1H3A	9606.ENSP00000296930	9606.ENSP00000480826	0	0	0	0	0	0.825	0	0.168	0.848
NPM1	HSP90AA1	9606.ENSP00000296930	9606.ENSP00000335153	0	0	0	0	0.228	0.294	0	0.768	0.863
NPM1	PA2G4	9606.ENSP00000296930	9606.ENSP00000302886	0	0	0	0	0.223	0.803	0	0.202	0.867
NPM1	FAM129A	9606.ENSP00000296930	9606.ENSP00000356481	0	0	0	0	0	0.27	0	0.826	0.867
NPM1	MYC	9606.ENSP00000296930	9606.ENSP00000479618	0	0	0	0	0.117	0.187	0	0.938	0.952
NRBP1	TSC22D4	9606.ENSP00000233557	9606.ENSP00000300181	0	0	0	0	0	0.787	0	0.477	0.884
NSFL1C	UBXN1	9606.ENSP00000418529	9606.ENSP00000294119	0	0	0	0	0.096	0.405	0.8	0.773	0.972
NSUN2	EIF3B	9606.ENSP00000264670	9606.ENSP00000354125	0	0	0	0	0.827	0	0	0.15	0.847
NSUN2	XRN2	9606.ENSP00000264670	9606.ENSP00000366396	0	0	0	0	0.072	0.789	0	0.514	0.896
NSUN2	DKC1	9606.ENSP00000264670	9606.ENSP00000358563	0.071	0	0	0	0.831	0	0	0.389	0.896
NSUN2	NPM1	9606.ENSP00000264670	9606.ENSP00000296930	0	0	0	0	0.1	0.468	0.9	0.826	0.99
NUMA1	NPM1	9606.ENSP00000377298	9606.ENSP00000296930	0	0	0	0	0.049	0.27	0	0.7	0.773
NUMA1	EPB41L2	9606.ENSP00000377298	9606.ENSP00000338481	0	0	0	0	0	0.27	0	0.662	0.743
NUMA1	CBX1	9606.ENSP00000377298	9606.ENSP00000377060	0	0	0	0	0.055	0	0	0.889	0.891
OTUD4	USP7	9606.ENSP00000409279	9606.ENSP00000343535	0	0	0	0	0.062	0.27	0	0.77	0.829
PA2G4	PSMA3	9606.ENSP00000302886	9606.ENSP00000216455	0	0	0.213	0	0.648	0	0	0.065	0.719
PA2G4	NPM1	9606.ENSP00000302886	9606.ENSP00000296930	0	0	0	0	0.223	0.803	0	0.202	0.867
PA2G4	DKC1	9606.ENSP00000302886	9606.ENSP00000358563	0	0	0	0	0.67	0.056	0	0.125	0.703
PA2G4	HDAC2	9606.ENSP00000302886	9606.ENSP00000430432	0	0	0	0	0.097	0.192	0	0.732	0.788
PA2G4	PWP1	9606.ENSP00000302886	9606.ENSP00000387365	0	0	0	0	0.793	0.148	0	0.078	0.823
PA2G4	EIF3B	9606.ENSP00000302886	9606.ENSP00000354125	0	0	0	0	0.848	0.067	0	0.066	0.856
PA2G4	SERBP1	9606.ENSP00000302886	9606.ENSP00000360034	0	0	0	0	0.418	0.847	0	0.102	0.913
PA2G4	AKT1	9606.ENSP00000302886	9606.ENSP00000451828	0	0	0	0	0	0.27	0	0.905	0.928
PA2G4	RPLP0	9606.ENSP00000302886	9606.ENSP00000449328	0.077	0	0	0	0.57	0.965	0	0.374	0.99
PACSIN1	COBLL1	9606.ENSP00000484060	9606.ENSP00000341360	0	0	0	0	0	0.68	0	0.367	0.789
PAG1	SLC9A3R1	9606.ENSP00000220597	9606.ENSP00000262613	0	0	0	0	0	0.27	0	0.649	0.732
PAG1	PXN	9606.ENSP00000220597	9606.ENSP00000267257	0	0	0	0	0	0	0.65	0.326	0.754
PALLD	VASP	9606.ENSP00000425556	9606.ENSP00000245932	0	0	0	0	0	0	0	0.927	0.927
PALLD	SORBS2	9606.ENSP00000425556	9606.ENSP00000347852	0	0	0	0	0.069	0.27	0	0.686	0.768
PCNT	HSP90AA1	9606.ENSP00000352572	9606.ENSP00000335153	0	0	0	0	0.047	0	0.8	0.123	0.818
PCNT	CDK5RAP2	9606.ENSP00000352572	9606.ENSP00000343818	0	0	0	0	0.152	0.919	0	0.99	0.999
PDS5B	NIPBL	9606.ENSP00000313851	9606.ENSP00000282516	0	0	0	0	0.653	0.7	0.6	0.808	0.99
PDS5B	SMC3	9606.ENSP00000313851	9606.ENSP00000354720	0	0	0	0	0.757	0.971	0.6	0.833	0.999
PEA15	MAPK3	9606.ENSP00000357055	9606.ENSP00000263025	0	0	0	0	0.063	0.683	0.6	0.975	0.996
PGRMC1	SERBP1	9606.ENSP00000217971	9606.ENSP00000360034	0	0	0	0	0	0	0	0.986	0.986
PI4K2A	INPP5F	9606.ENSP00000359665	9606.ENSP00000354519	0	0	0	0	0.063	0	0.8	0.249	0.847
PIAS1	RANBP2	9606.ENSP00000249636	9606.ENSP00000283195	0	0	0	0	0.084	0	0	0.699	0.712
PIAS1	HNRNPU	9606.ENSP00000249636	9606.ENSP00000283179	0	0	0	0	0.085	0	0	0.719	0.732
PIAS1	ACIN1	9606.ENSP00000249636	9606.ENSP00000262710	0	0	0	0	0.088	0	0	0.733	0.746
PIAS1	SRSF1	9606.ENSP00000249636	9606.ENSP00000258962	0	0	0	0	0.064	0.27	0	0.884	0.914
PML	TRIM28	9606.ENSP00000268058	9606.ENSP00000253024	0	0	0	0.546	0	0	0.9	0.518	0.922
PML	EP300	9606.ENSP00000268058	9606.ENSP00000263253	0	0	0	0	0.057	0.226	0.9	0.306	0.942
PML	TP53BP1	9606.ENSP00000268058	9606.ENSP00000371475	0	0	0	0	0.049	0.654	0	0.244	0.729
PML	USP7	9606.ENSP00000268058	9606.ENSP00000343535	0	0	0	0	0	0.622	0	0.346	0.742
PML	AKT1S1	9606.ENSP00000268058	9606.ENSP00000375711	0	0	0	0	0	0	0.9	0	0.9
PML	CHD4	9606.ENSP00000268058	9606.ENSP00000349508	0	0	0	0	0	0.282	0.9	0.076	0.927
PML	YAP1	9606.ENSP00000268058	9606.ENSP00000478927	0	0	0	0	0.049	0.281	0.9	0.1	0.93
PML	RANBP2	9606.ENSP00000268058	9606.ENSP00000283195	0	0	0	0	0.062	0.27	0.9	0.333	0.948
PML	PRAM1	9606.ENSP00000268058	9606.ENSP00000408342	0	0	0	0	0	0	0.9	0.578	0.956
PML	FOXO1	9606.ENSP00000268058	9606.ENSP00000368880	0	0	0	0	0	0.281	0	0.948	0.961
PML	AKT1	9606.ENSP00000268058	9606.ENSP00000451828	0	0	0	0	0	0.057	0.9	0.654	0.964
PML	MYC	9606.ENSP00000268058	9606.ENSP00000479618	0	0	0	0	0.06	0.626	0.9	0.324	0.973
PML	HDAC2	9606.ENSP00000268058	9606.ENSP00000430432	0	0	0	0	0.062	0.839	0.9	0.171	0.985
PML	HDAC1	9606.ENSP00000268058	9606.ENSP00000362649	0	0	0	0	0.062	0.763	0.9	0.448	0.986
PML	SP100	9606.ENSP00000268058	9606.ENSP00000343023	0	0	0	0	0.063	0.785	0.9	0.827	0.996
POGZ	CBX5	9606.ENSP00000271715	9606.ENSP00000209875	0	0	0	0	0	0.799	0	0.607	0.917
POGZ	CBX3	9606.ENSP00000271715	9606.ENSP00000336687	0	0	0	0	0.075	0.782	0	0.177	0.82
POGZ	CBX1	9606.ENSP00000271715	9606.ENSP00000377060	0	0	0	0	0.062	0.92	0	0.518	0.961
POLD3	MCM3	9606.ENSP00000263681	9606.ENSP00000480987	0	0	0	0	0.287	0.61	0.72	0.637	0.968
POLR2A	CDK13	9606.ENSP00000480158	9606.ENSP00000181839	0	0	0	0	0.1	0.757	0	0.645	0.915
POLR2A	SMARCC1	9606.ENSP00000480158	9606.ENSP00000254480	0	0	0	0	0.118	0.115	0.9	0.431	0.949
POLR2A	SRSF1	9606.ENSP00000480158	9606.ENSP00000258962	0	0	0	0	0.073	0.182	0.6	0.247	0.741
POLR2A	EP300	9606.ENSP00000480158	9606.ENSP00000263253	0	0	0	0	0.111	0.555	0.9	0.427	0.974
POLR2A	TAF12	9606.ENSP00000480158	9606.ENSP00000263974	0	0	0	0	0.063	0.075	0.6	0.468	0.791
POLR2A	DIDO1	9606.ENSP00000480158	9606.ENSP00000266070	0	0	0	0	0.215	0.722	0	0.287	0.83
POLR2A	SMARCC2	9606.ENSP00000480158	9606.ENSP00000267064	0	0	0	0	0.118	0.115	0.9	0.202	0.929
POLR2A	RPS3	9606.ENSP00000480158	9606.ENSP00000278572	0.167	0	0	0	0.429	0.26	0	0.281	0.713
POLR2A	HNRNPU	9606.ENSP00000480158	9606.ENSP00000283179	0	0	0	0	0.076	0.85	0.6	0.057	0.94
POLR2A	IWS1	9606.ENSP00000480158	9606.ENSP00000295321	0	0	0	0	0.156	0.591	0.6	0.384	0.903
POLR2A	MEF2C	9606.ENSP00000480158	9606.ENSP00000340874	0	0	0	0	0	0	0.9	0.1	0.906
POLR2A	USP7	9606.ENSP00000480158	9606.ENSP00000343535	0	0	0	0	0.146	0.078	0.6	0.16	0.7
POLR2A	NCOA3	9606.ENSP00000480158	9606.ENSP00000361066	0	0	0	0	0.059	0	0.9	0.12	0.91
POLR2A	CSTF2	9606.ENSP00000480158	9606.ENSP00000362063	0	0	0	0	0.116	0.379	0	0.504	0.704
POLR2A	NELFE	9606.ENSP00000480158	9606.ENSP00000364578	0	0	0	0	0.082	0.903	0.6	0.529	0.981
POLR2A	HNRNPK	9606.ENSP00000480158	9606.ENSP00000365439	0	0	0	0	0.079	0.27	0.6	0.122	0.732
POLR2A	XRN2	9606.ENSP00000480158	9606.ENSP00000366396	0	0	0	0	0.173	0.535	0	0.611	0.837
POLR2A	HMGN1	9606.ENSP00000480158	9606.ENSP00000370125	0	0	0	0	0.055	0.27	0.6	0.155	0.735
POLR2A	CCNK	9606.ENSP00000480158	9606.ENSP00000374529	0	0	0	0	0.21	0.742	0.6	0.741	0.976
POLR2A	SRSF2	9606.ENSP00000480158	9606.ENSP00000376276	0	0	0	0	0.18	0.439	0.6	0.443	0.883
POLR2A	NCOA1	9606.ENSP00000480158	9606.ENSP00000385216	0	0	0	0	0	0	0.9	0	0.9
POLR2A	SCAF8	9606.ENSP00000480158	9606.ENSP00000413098	0	0	0	0	0.199	0.78	0	0.196	0.846
POLR2A	HTATSF1	9606.ENSP00000480158	9606.ENSP00000442699	0	0	0	0	0.059	0.462	0	0.59	0.774
POLR2A	RPLP0	9606.ENSP00000480158	9606.ENSP00000449328	0.111	0	0	0	0.172	0.248	0	0.543	0.713
POLR2A	IRF3	9606.ENSP00000480158	9606.ENSP00000471896	0	0	0	0	0.045	0.273	0.9	0.124	0.931
POLR2A	MYC	9606.ENSP00000480158	9606.ENSP00000479618	0	0	0	0	0.062	0.632	0	0.542	0.828
POU2F2	NFKB1	9606.ENSP00000431603	9606.ENSP00000226574	0	0	0	0	0	0.058	0.9	0.18	0.916
PPIG	MPHOSPH10	9606.ENSP00000260970	9606.ENSP00000244230	0	0	0	0	0.818	0	0	0	0.818
PPIG	HSP90AB1	9606.ENSP00000260970	9606.ENSP00000360609	0	0	0	0	0.506	0.384	0	0.348	0.784
PPIG	SNIP1	9606.ENSP00000260970	9606.ENSP00000296215	0	0	0	0	0.099	0.78	0	0	0.793
PPIG	SLU7	9606.ENSP00000260970	9606.ENSP00000297151	0	0	0	0	0.112	0.679	0	0.37	0.804
PPIG	PRPF40A	9606.ENSP00000260970	9606.ENSP00000386458	0	0	0	0	0.427	0.684	0	0	0.811
PPIG	SRRM2	9606.ENSP00000260970	9606.ENSP00000301740	0	0	0	0	0.126	0.826	0	0.099	0.851
PPIG	HSP90AA1	9606.ENSP00000260970	9606.ENSP00000335153	0	0	0	0	0.52	0.384	0	0.568	0.861
PPIG	PTGES3	9606.ENSP00000260970	9606.ENSP00000482075	0	0	0	0	0.534	0.53	0	0.482	0.876
PPP1R12A	MYH9	9606.ENSP00000389168	9606.ENSP00000216181	0	0	0	0	0.062	0.246	0.9	0.324	0.945
PPP1R12A	MYH11	9606.ENSP00000389168	9606.ENSP00000379616	0	0	0	0	0.049	0.169	0.9	0.361	0.942
PPP1R12A	PPP1R9B	9606.ENSP00000389168	9606.ENSP00000478767	0	0	0	0	0.056	0.182	0.9	0.542	0.959
PPP1R9B	DBN1	9606.ENSP00000478767	9606.ENSP00000292385	0	0	0	0	0.062	0.427	0	0.642	0.791
PPP1R9B	PPP1R12A	9606.ENSP00000478767	9606.ENSP00000389168	0	0	0	0	0.056	0.182	0.9	0.542	0.959
PRAM1	PML	9606.ENSP00000408342	9606.ENSP00000268058	0	0	0	0	0	0	0.9	0.578	0.956
PRAM1	SP100	9606.ENSP00000408342	9606.ENSP00000343023	0	0	0	0	0.065	0	0.9	0.208	0.919
PRKAB1	CRTC2	9606.ENSP00000229328	9606.ENSP00000357622	0	0	0	0	0	0	0.8	0.211	0.835
PRKAB1	LAMTOR1	9606.ENSP00000229328	9606.ENSP00000278671	0	0	0	0	0.219	0	0.9	0.128	0.926
PRKAB1	ACACA	9606.ENSP00000229328	9606.ENSP00000483300	0	0	0	0	0.062	0.27	0.9	0.412	0.954
PRKAR1A	SLC9A3R1	9606.ENSP00000376475	9606.ENSP00000262613	0	0	0	0	0	0.056	0.9	0.125	0.91
PRKAR1A	MAPK3	9606.ENSP00000376475	9606.ENSP00000263025	0	0	0	0	0.063	0.074	0.9	0.237	0.925
PRKAR1A	PRKAR2B	9606.ENSP00000376475	9606.ENSP00000265717	0	0	0	0.859	0.065	0.538	0.9	0.851	0.958
PRKAR1A	PXN	9606.ENSP00000376475	9606.ENSP00000267257	0	0	0	0	0.143	0	0.9	0	0.91
PRKAR1A	FN1	9606.ENSP00000376475	9606.ENSP00000346839	0	0	0	0	0	0	0.9	0.088	0.904
PRKAR1A	ITGA4	9606.ENSP00000376475	9606.ENSP00000380227	0	0	0	0	0.062	0.213	0.9	0	0.919
PRKAR2B	SLC9A3R1	9606.ENSP00000265717	9606.ENSP00000262613	0	0	0	0	0	0.056	0.9	0.061	0.903
PRKAR2B	MAPK3	9606.ENSP00000265717	9606.ENSP00000263025	0	0	0	0	0.065	0.074	0.9	0.251	0.926
PRKAR2B	AKAP2	9606.ENSP00000265717	9606.ENSP00000404782	0	0	0	0	0	0.647	0	0.432	0.791
PRKAR2B	PXN	9606.ENSP00000265717	9606.ENSP00000267257	0	0	0	0	0.143	0	0.9	0	0.91
PRKAR2B	PRKAR1A	9606.ENSP00000265717	9606.ENSP00000376475	0	0	0	0.859	0.065	0.538	0.9	0.851	0.958
PRKAR2B	AKAP13	9606.ENSP00000265717	9606.ENSP00000354718	0	0	0	0	0.062	0.205	0.9	0.562	0.962
PRPF40A	PPIG	9606.ENSP00000386458	9606.ENSP00000260970	0	0	0	0	0.427	0.684	0	0	0.811
PRPF40A	RBM25	9606.ENSP00000386458	9606.ENSP00000261973	0	0	0	0	0.496	0.98	0	0.94	0.999
PRPF40A	ACIN1	9606.ENSP00000386458	9606.ENSP00000262710	0	0	0	0	0.147	0.681	0	0.09	0.731
PRPF40A	SNIP1	9606.ENSP00000386458	9606.ENSP00000296215	0	0	0	0	0.129	0.722	0	0	0.748
PRPF40A	SRRM2	9606.ENSP00000386458	9606.ENSP00000301740	0	0	0	0	0.197	0.678	0	0.304	0.804
PRPF4B	RBM25	9606.ENSP00000337194	9606.ENSP00000261973	0	0	0	0	0.862	0.391	0	0.257	0.932
PRPF4B	SRSF2	9606.ENSP00000337194	9606.ENSP00000376276	0	0	0	0	0.116	0.056	0	0.723	0.749
PRPF4B	SON	9606.ENSP00000337194	9606.ENSP00000348984	0	0	0	0.55	0.839	0	0	0.075	0.842
PSMA3	PA2G4	9606.ENSP00000216455	9606.ENSP00000302886	0	0	0.213	0	0.648	0	0	0.065	0.719
PSMA3	HNRNPA1	9606.ENSP00000216455	9606.ENSP00000341826	0	0	0	0	0.463	0.494	0	0.063	0.723
PSMA3	HSP90AB1	9606.ENSP00000216455	9606.ENSP00000360609	0	0	0	0	0.396	0.495	0	0.186	0.73
PSMA3	EIF3B	9606.ENSP00000216455	9606.ENSP00000354125	0	0	0	0	0.73	0	0	0	0.73
PSMA3	RPS3	9606.ENSP00000216455	9606.ENSP00000278572	0	0	0.337	0	0.649	0.059	0	0.055	0.765
PSMA3	RPLP0	9606.ENSP00000216455	9606.ENSP00000449328	0	0	0	0	0.642	0	0	0.453	0.796
PSMA3	STUB1	9606.ENSP00000216455	9606.ENSP00000219548	0	0	0	0	0.072	0.865	0	0.062	0.872
PSMA3	HSP90AA1	9606.ENSP00000216455	9606.ENSP00000335153	0	0	0	0	0.759	0.282	0	0.333	0.874
PSMA3	NFKB1	9606.ENSP00000216455	9606.ENSP00000226574	0	0	0	0	0.249	0.149	0.9	0.054	0.931
PTGES3	STUB1	9606.ENSP00000482075	9606.ENSP00000219548	0	0	0	0	0.073	0.27	0.54	0.564	0.846
PTGES3	PPIG	9606.ENSP00000482075	9606.ENSP00000260970	0	0	0	0	0.534	0.53	0	0.482	0.876
PTGES3	MAPK3	9606.ENSP00000482075	9606.ENSP00000263025	0	0	0	0	0	0.076	0.9	0.145	0.914
PTGES3	HNRNPU	9606.ENSP00000482075	9606.ENSP00000283179	0	0	0	0	0.189	0	0.72	0	0.763
PTGES3	RAD9A	9606.ENSP00000482075	9606.ENSP00000311360	0	0	0	0	0	0	0.9	0.058	0.901
PTGES3	HSP90AA1	9606.ENSP00000482075	9606.ENSP00000335153	0	0	0	0	0.65	0.98	0.9	0.994	0.999
PTGES3	DKC1	9606.ENSP00000482075	9606.ENSP00000358563	0	0	0	0	0.143	0.299	0.9	0.18	0.944
PTGES3	HSP90AB1	9606.ENSP00000482075	9606.ENSP00000360609	0	0	0	0	0.598	0.945	0.8	0.736	0.998
PTGES3	AKT1	9606.ENSP00000482075	9606.ENSP00000451828	0	0	0	0	0	0.057	0.9	0.449	0.943
PTPRC	DOCK2	9606.ENSP00000411355	9606.ENSP00000256935	0	0	0	0	0.734	0	0	0.227	0.786
PTPRC	LY9	9606.ENSP00000411355	9606.ENSP00000263285	0	0	0	0	0.683	0	0	0.408	0.804
PTPRC	IKZF1	9606.ENSP00000411355	9606.ENSP00000331614	0	0	0	0	0.821	0.057	0	0.464	0.901
PTPRC	EVI2B	9606.ENSP00000411355	9606.ENSP00000333779	0	0	0	0	0.742	0	0	0.196	0.784
PTPRC	FN1	9606.ENSP00000411355	9606.ENSP00000346839	0	0	0	0	0.062	0	0	0.711	0.718
PTPRC	ITGA4	9606.ENSP00000411355	9606.ENSP00000380227	0	0	0	0	0.2	0.119	0	0.692	0.764
PTPRC	DOCK8	9606.ENSP00000411355	9606.ENSP00000394888	0	0	0	0	0.628	0	0	0.255	0.711
PTPRC	FYB	9606.ENSP00000411355	9606.ENSP00000427114	0	0	0	0	0.777	0	0	0.298	0.837
PWP1	FKBP15	9606.ENSP00000387365	9606.ENSP00000238256	0	0	0	0	0.666	0.215	0	0.22	0.778
PWP1	MPHOSPH10	9606.ENSP00000387365	9606.ENSP00000244230	0	0	0	0	0.863	0	0	0.124	0.874
PWP1	PA2G4	9606.ENSP00000387365	9606.ENSP00000302886	0	0	0	0	0.793	0.148	0	0.078	0.823
PWP1	KRI1	9606.ENSP00000387365	9606.ENSP00000320917	0	0	0	0	0.867	0	0	0	0.867
PWP1	DKC1	9606.ENSP00000387365	9606.ENSP00000358563	0	0	0	0	0.861	0.255	0	0.066	0.894
PXN	VCL	9606.ENSP00000267257	9606.ENSP00000211998	0	0	0	0	0.097	0.914	0.9	0.994	0.999
PXN	PAG1	9606.ENSP00000267257	9606.ENSP00000220597	0	0	0	0	0	0	0.65	0.326	0.754
PXN	VASP	9606.ENSP00000267257	9606.ENSP00000245932	0	0	0	0	0.085	0	0	0.74	0.752
PXN	ARHGEF6	9606.ENSP00000267257	9606.ENSP00000250617	0	0	0	0	0.06	0.425	0.9	0.67	0.979
PXN	MAPK3	9606.ENSP00000267257	9606.ENSP00000263025	0	0	0	0	0.062	0.23	0.9	0.641	0.97
PXN	PRKAR2B	9606.ENSP00000267257	9606.ENSP00000265717	0	0	0	0	0.143	0	0.9	0	0.91
PXN	CFL1	9606.ENSP00000267257	9606.ENSP00000432660	0	0	0	0	0.089	0.065	0	0.677	0.701
PXN	HSP90AA1	9606.ENSP00000267257	9606.ENSP00000335153	0	0	0	0	0	0	0.6	0.294	0.705
PXN	MYH11	9606.ENSP00000267257	9606.ENSP00000379616	0	0	0	0	0.064	0.16	0.6	0.239	0.728
PXN	MAPK8	9606.ENSP00000267257	9606.ENSP00000378974	0	0	0	0	0	0.738	0	0.408	0.838
PXN	AKT1	9606.ENSP00000267257	9606.ENSP00000451828	0	0	0	0	0.083	0.063	0	0.874	0.883
PXN	PRKAR1A	9606.ENSP00000267257	9606.ENSP00000376475	0	0	0	0	0.143	0	0.9	0	0.91
PXN	CAST	9606.ENSP00000267257	9606.ENSP00000379157	0	0	0	0	0.062	0	0.9	0.213	0.919
PXN	SPTAN1	9606.ENSP00000267257	9606.ENSP00000361824	0	0	0	0	0.057	0.066	0.9	0.193	0.919
PXN	ZYX	9606.ENSP00000267257	9606.ENSP00000324422	0	0	0	0.584	0.118	0.217	0.9	0.952	0.954
PXN	FN1	9606.ENSP00000267257	9606.ENSP00000346839	0	0	0	0	0.062	0.247	0.9	0.962	0.996
PXN	ITGA4	9606.ENSP00000267257	9606.ENSP00000380227	0	0	0	0	0.062	0.77	0.9	0.985	0.999
RAD9A	MSH6	9606.ENSP00000311360	9606.ENSP00000234420	0	0	0	0	0.064	0.297	0	0.608	0.72
RAD9A	TP53BP1	9606.ENSP00000311360	9606.ENSP00000371475	0	0	0	0	0.049	0.528	0	0.756	0.881
RAD9A	PTGES3	9606.ENSP00000311360	9606.ENSP00000482075	0	0	0	0	0	0	0.9	0.058	0.901
RAD9A	DKC1	9606.ENSP00000311360	9606.ENSP00000358563	0	0	0	0	0.062	0	0.9	0	0.902
RAD9A	HSP90AA1	9606.ENSP00000311360	9606.ENSP00000335153	0	0	0	0	0	0	0.9	0.313	0.928
RAD9A	TLK1	9606.ENSP00000311360	9606.ENSP00000411099	0	0	0	0	0	0.27	0	0.918	0.938
RANBP2	PIAS1	9606.ENSP00000283195	9606.ENSP00000249636	0	0	0	0	0.084	0	0	0.699	0.712
RANBP2	PML	9606.ENSP00000283195	9606.ENSP00000268058	0	0	0	0	0.062	0.27	0.9	0.333	0.948
RANBP2	SON	9606.ENSP00000283195	9606.ENSP00000348984	0	0	0	0	0.654	0.072	0	0.158	0.706
RANBP2	NPM1	9606.ENSP00000283195	9606.ENSP00000296930	0	0	0	0	0.166	0.057	0.6	0.348	0.767
RANBP2	SRRM1	9606.ENSP00000283195	9606.ENSP00000326261	0	0	0	0	0.11	0.354	0.6	0.158	0.78
RANBP2	HDAC1	9606.ENSP00000283195	9606.ENSP00000362649	0	0	0	0	0.118	0.244	0.9	0.199	0.939
RANBP2	SP100	9606.ENSP00000283195	9606.ENSP00000343023	0	0	0	0	0.067	0.488	0.9	0.489	0.972
RAVER1	VCL	9606.ENSP00000293677	9606.ENSP00000211998	0	0	0	0	0	0.932	0	0.872	0.991
RAVER1	RBM25	9606.ENSP00000293677	9606.ENSP00000261973	0	0	0	0	0.203	0.653	0	0.178	0.752
RBL1	DNMT1	9606.ENSP00000362768	9606.ENSP00000352516	0	0	0	0	0.092	0.731	0	0.274	0.807
RBL1	HDAC1	9606.ENSP00000362768	9606.ENSP00000362649	0	0	0	0	0.064	0.597	0.9	0.968	0.998
RBL1	MCM3	9606.ENSP00000362768	9606.ENSP00000480987	0	0	0	0	0.511	0	0	0.44	0.714
RBL1	TP53BP1	9606.ENSP00000362768	9606.ENSP00000371475	0	0	0	0	0.344	0.297	0	0.444	0.721
RBL1	HDAC2	9606.ENSP00000362768	9606.ENSP00000430432	0	0	0	0	0.064	0.428	0.9	0.269	0.955
RBL1	MYC	9606.ENSP00000362768	9606.ENSP00000479618	0	0	0	0	0	0.27	0.9	0.938	0.995
RBM25	SRSF1	9606.ENSP00000261973	9606.ENSP00000258962	0	0	0	0	0.342	0.653	0	0.481	0.871
RBM25	SRSF2	9606.ENSP00000261973	9606.ENSP00000376276	0	0	0	0	0.462	0	0	0.521	0.731
RBM25	RAVER1	9606.ENSP00000261973	9606.ENSP00000293677	0	0	0	0	0.203	0.653	0	0.178	0.752
RBM25	SNIP1	9606.ENSP00000261973	9606.ENSP00000296215	0	0	0	0	0.18	0.688	0	0.143	0.761
RBM25	API5	9606.ENSP00000261973	9606.ENSP00000431391	0	0	0	0	0.459	0	0	0.59	0.769
RBM25	CSTF2	9606.ENSP00000261973	9606.ENSP00000362063	0	0	0	0.55	0.325	0.653	0	0.178	0.771
RBM25	SLU7	9606.ENSP00000261973	9606.ENSP00000297151	0	0	0	0	0.812	0.057	0	0.61	0.924
RBM25	PRPF4B	9606.ENSP00000261973	9606.ENSP00000337194	0	0	0	0	0.862	0.391	0	0.257	0.932
RBM25	SRRM2	9606.ENSP00000261973	9606.ENSP00000301740	0	0	0	0	0.203	0.785	0	0.844	0.971
RBM25	SRRM1	9606.ENSP00000261973	9606.ENSP00000326261	0	0	0	0	0.453	0.769	0	0.88	0.983
RBM25	PRPF40A	9606.ENSP00000261973	9606.ENSP00000386458	0	0	0	0	0.496	0.98	0	0.94	0.999
RBM26	ZC3H4	9606.ENSP00000483408	9606.ENSP00000253048	0	0	0	0	0.136	0.226	0	0.595	0.705
REPS1	BMP2K	9606.ENSP00000392065	9606.ENSP00000334836	0	0	0	0	0	0.749	0	0.656	0.91
REPS1	ITSN1	9606.ENSP00000392065	9606.ENSP00000370719	0	0	0	0.55	0	0.27	0.6	0.88	0.815
REPS1	AAK1	9606.ENSP00000392065	9606.ENSP00000386456	0	0	0	0	0	0.799	0.8	0.223	0.966
REPS1	CLINT1	9606.ENSP00000392065	9606.ENSP00000429824	0	0	0	0	0.049	0.477	0.54	0.047	0.752
RERE	HDAC2	9606.ENSP00000338629	9606.ENSP00000430432	0	0	0	0	0	0.645	0	0.51	0.818
RERE	HDAC1	9606.ENSP00000338629	9606.ENSP00000362649	0	0	0	0	0	0.86	0	0.731	0.96
RPL22L1	RPS3	9606.ENSP00000346080	9606.ENSP00000278572	0	0	0	0	0.682	0.787	0	0.539	0.966
RPL22L1	RPLP1	9606.ENSP00000346080	9606.ENSP00000346037	0	0	0	0	0.824	0.787	0	0.425	0.976
RPL22L1	RPLP0	9606.ENSP00000346080	9606.ENSP00000449328	0	0	0	0	0.817	0.772	0	0.149	0.961
RPLP0	PSMA3	9606.ENSP00000449328	9606.ENSP00000216455	0	0	0	0	0.642	0	0	0.453	0.796
RPLP0	RPS3	9606.ENSP00000449328	9606.ENSP00000278572	0.219	0	0	0	0.997	0.991	0	0.782	0.999
RPLP0	PA2G4	9606.ENSP00000449328	9606.ENSP00000302886	0.077	0	0	0	0.57	0.965	0	0.374	0.99
RPLP0	RPLP1	9606.ENSP00000449328	9606.ENSP00000346037	0.167	0	0	0	0.985	0.997	0	0.894	0.999
RPLP0	RPL22L1	9606.ENSP00000449328	9606.ENSP00000346080	0	0	0	0	0.817	0.772	0	0.149	0.961
RPLP0	EIF3B	9606.ENSP00000449328	9606.ENSP00000354125	0	0	0	0	0.802	0	0	0.235	0.842
RPLP0	SERBP1	9606.ENSP00000449328	9606.ENSP00000360034	0	0	0	0	0.318	0.955	0	0.08	0.969
RPLP0	EEF1D	9606.ENSP00000449328	9606.ENSP00000410059	0.042	0	0	0	0.809	0.788	0	0.249	0.967
RPLP0	POLR2A	9606.ENSP00000449328	9606.ENSP00000480158	0.111	0	0	0	0.172	0.248	0	0.543	0.713
RPLP1	RPS3	9606.ENSP00000346037	9606.ENSP00000278572	0	0	0	0	0.976	0.985	0	0.495	0.999
RPLP1	EEF1D	9606.ENSP00000346037	9606.ENSP00000410059	0.045	0	0	0	0.838	0.656	0	0.119	0.947
RPLP1	SERBP1	9606.ENSP00000346037	9606.ENSP00000360034	0	0	0	0	0.44	0.955	0	0	0.974
RPLP1	RPL22L1	9606.ENSP00000346037	9606.ENSP00000346080	0	0	0	0	0.824	0.787	0	0.425	0.976
RPLP1	RPLP0	9606.ENSP00000346037	9606.ENSP00000449328	0.167	0	0	0	0.985	0.997	0	0.894	0.999
RPS3	PSMA3	9606.ENSP00000278572	9606.ENSP00000216455	0	0	0.337	0	0.649	0.059	0	0.055	0.765
RPS3	EIF5	9606.ENSP00000278572	9606.ENSP00000216554	0	0	0	0	0.242	0.577	0	0.524	0.834
RPS3	NFKB1	9606.ENSP00000278572	9606.ENSP00000226574	0	0	0	0	0.123	0.721	0	0.182	0.782
RPS3	POLR2A	9606.ENSP00000278572	9606.ENSP00000480158	0.167	0	0	0	0.429	0.26	0	0.281	0.713
RPS3	SERBP1	9606.ENSP00000278572	9606.ENSP00000360034	0	0	0	0	0.368	0.853	0	0.131	0.912
RPS3	HSP90AA1	9606.ENSP00000278572	9606.ENSP00000335153	0	0	0	0	0.305	0.281	0	0.913	0.953
RPS3	EEF1D	9606.ENSP00000278572	9606.ENSP00000410059	0.153	0	0	0	0.816	0.758	0	0.169	0.964
RPS3	RPL22L1	9606.ENSP00000278572	9606.ENSP00000346080	0	0	0	0	0.682	0.787	0	0.539	0.966
RPS3	EIF3B	9606.ENSP00000278572	9606.ENSP00000354125	0	0	0	0	0.781	0.686	0.6	0.684	0.99
RPS3	RPLP0	9606.ENSP00000278572	9606.ENSP00000449328	0.219	0	0	0	0.997	0.991	0	0.782	0.999
RPS3	RPLP1	9606.ENSP00000278572	9606.ENSP00000346037	0	0	0	0	0.976	0.985	0	0.495	0.999
SCAF8	XRN2	9606.ENSP00000413098	9606.ENSP00000366396	0	0	0	0	0.394	0.305	0	0.378	0.715
SCAF8	POLR2A	9606.ENSP00000413098	9606.ENSP00000480158	0	0	0	0	0.199	0.78	0	0.196	0.846
SERBP1	PGRMC1	9606.ENSP00000360034	9606.ENSP00000217971	0	0	0	0	0	0	0	0.986	0.986
SERBP1	RPS3	9606.ENSP00000360034	9606.ENSP00000278572	0	0	0	0	0.368	0.853	0	0.131	0.912
SERBP1	PA2G4	9606.ENSP00000360034	9606.ENSP00000302886	0	0	0	0	0.418	0.847	0	0.102	0.913
SERBP1	RPLP1	9606.ENSP00000360034	9606.ENSP00000346037	0	0	0	0	0.44	0.955	0	0	0.974
SERBP1	RPLP0	9606.ENSP00000360034	9606.ENSP00000449328	0	0	0	0	0.318	0.955	0	0.08	0.969
SET	NPM1	9606.ENSP00000361777	9606.ENSP00000296930	0	0	0	0	0.656	0	0	0.308	0.752
SET	HIST1H3A	9606.ENSP00000361777	9606.ENSP00000480826	0	0	0	0	0.062	0.721	0	0.134	0.754
SET	ANP32A	9606.ENSP00000361777	9606.ENSP00000417864	0	0	0	0	0.296	0.682	0.9	0.916	0.997
SGTA	HSP90AA1	9606.ENSP00000221566	9606.ENSP00000335153	0.047	0	0	0	0.127	0.661	0	0.907	0.97
SH3KBP1	CD2AP	9606.ENSP00000380921	9606.ENSP00000352264	0	0	0	0.849	0	0.878	0	0.873	0.893
SH3KBP1	ARAP1	9606.ENSP00000380921	9606.ENSP00000377233	0	0	0	0	0.059	0.875	0	0.846	0.98
SH3KBP1	ARHGAP27	9606.ENSP00000380921	9606.ENSP00000403323	0	0	0	0	0	0.375	0	0.839	0.895
SLC9A1	MAPK14	9606.ENSP00000263980	9606.ENSP00000229795	0	0	0	0	0	0.267	0.9	0.205	0.936
SLC9A1	MAPK3	9606.ENSP00000263980	9606.ENSP00000263025	0	0	0	0	0.079	0.108	0.8	0.472	0.901
SLC9A3R1	PAG1	9606.ENSP00000262613	9606.ENSP00000220597	0	0	0	0	0	0.27	0	0.649	0.732
SLC9A3R1	YAP1	9606.ENSP00000262613	9606.ENSP00000478927	0	0	0	0	0	0.333	0	0.595	0.719
SLC9A3R1	PRKAR2B	9606.ENSP00000262613	9606.ENSP00000265717	0	0	0	0	0	0.056	0.9	0.061	0.903
SLC9A3R1	PRKAR1A	9606.ENSP00000262613	9606.ENSP00000376475	0	0	0	0	0	0.056	0.9	0.125	0.91
SLU7	SRSF1	9606.ENSP00000297151	9606.ENSP00000258962	0	0	0	0	0.062	0.144	0.8	0.416	0.893
SLU7	PPIG	9606.ENSP00000297151	9606.ENSP00000260970	0	0	0	0	0.112	0.679	0	0.37	0.804
SLU7	RBM25	9606.ENSP00000297151	9606.ENSP00000261973	0	0	0	0	0.812	0.057	0	0.61	0.924
SLU7	SRRM1	9606.ENSP00000297151	9606.ENSP00000326261	0	0	0	0	0.072	0	0.6	0.381	0.75
SLU7	HTATSF1	9606.ENSP00000297151	9606.ENSP00000442699	0	0	0	0	0.123	0.392	0	0.588	0.761
SLU7	KRI1	9606.ENSP00000297151	9606.ENSP00000320917	0	0	0	0	0.65	0	0	0.384	0.775
SLU7	SRSF2	9606.ENSP00000297151	9606.ENSP00000376276	0	0	0	0	0.062	0.349	0.8	0.28	0.9
SLU7	SRRM2	9606.ENSP00000297151	9606.ENSP00000301740	0	0	0	0	0.082	0.872	0	0.506	0.937
SMARCC1	TRIM28	9606.ENSP00000254480	9606.ENSP00000253024	0	0	0	0	0.232	0.501	0	0.316	0.715
SMARCC1	HDAC1	9606.ENSP00000254480	9606.ENSP00000362649	0	0	0	0	0.393	0.625	0	0.542	0.886
SMARCC1	IRF3	9606.ENSP00000254480	9606.ENSP00000471896	0	0	0	0	0	0	0.9	0	0.9
SMARCC1	POLR2A	9606.ENSP00000254480	9606.ENSP00000480158	0	0	0	0	0.118	0.115	0.9	0.431	0.949
SMARCC1	CHD4	9606.ENSP00000254480	9606.ENSP00000349508	0	0	0	0	0.411	0.872	0	0.497	0.959
SMARCC1	SMARCC2	9606.ENSP00000254480	9606.ENSP00000267064	0	0	0	0.962	0.082	0.902	0.9	0.989	0.99
SMARCC1	DPF2	9606.ENSP00000254480	9606.ENSP00000436901	0	0	0	0	0.123	0.897	0.54	0.84	0.992
SMARCC2	SMARCC1	9606.ENSP00000267064	9606.ENSP00000254480	0	0	0	0.962	0.082	0.902	0.9	0.989	0.99
SMARCC2	CHD4	9606.ENSP00000267064	9606.ENSP00000349508	0	0	0	0	0.233	0.423	0	0.434	0.728
SMARCC2	IRF3	9606.ENSP00000267064	9606.ENSP00000471896	0	0	0	0	0.157	0	0.9	0	0.912
SMARCC2	POLR2A	9606.ENSP00000267064	9606.ENSP00000480158	0	0	0	0	0.118	0.115	0.9	0.202	0.929
SMARCC2	DPF2	9606.ENSP00000267064	9606.ENSP00000436901	0	0	0	0	0.123	0.972	0.54	0.721	0.996
SMC3	MSH6	9606.ENSP00000354720	9606.ENSP00000234420	0	0	0	0	0.807	0.272	0	0.64	0.945
SMC3	NIPBL	9606.ENSP00000354720	9606.ENSP00000282516	0	0	0	0	0.68	0.989	0.6	0.95	0.999
SMC3	PDS5B	9606.ENSP00000354720	9606.ENSP00000313851	0	0	0	0	0.757	0.971	0.6	0.833	0.999
SMC3	HDAC1	9606.ENSP00000354720	9606.ENSP00000362649	0.045	0	0	0	0.145	0.606	0	0.506	0.82
SMC3	MCM3	9606.ENSP00000354720	9606.ENSP00000480987	0	0	0	0	0.681	0	0	0.515	0.838
SMC3	HDAC2	9606.ENSP00000354720	9606.ENSP00000430432	0.045	0	0	0	0.188	0.7	0	0.483	0.864
SMC3	MYC	9606.ENSP00000354720	9606.ENSP00000479618	0	0	0	0	0	0.092	0.9	0.412	0.942
SMC3	TP53BP1	9606.ENSP00000354720	9606.ENSP00000371475	0	0	0	0	0.499	0.134	0.9	0.325	0.966
SNIP1	PPIG	9606.ENSP00000296215	9606.ENSP00000260970	0	0	0	0	0.099	0.78	0	0	0.793
SNIP1	RBM25	9606.ENSP00000296215	9606.ENSP00000261973	0	0	0	0	0.18	0.688	0	0.143	0.761
SNIP1	ACIN1	9606.ENSP00000296215	9606.ENSP00000262710	0	0	0	0	0.084	0.67	0	0.202	0.737
SNIP1	EP300	9606.ENSP00000296215	9606.ENSP00000263253	0	0	0	0	0.064	0.345	0.9	0.515	0.966
SNIP1	PRPF40A	9606.ENSP00000296215	9606.ENSP00000386458	0	0	0	0	0.129	0.722	0	0	0.748
SNIP1	SRRM1	9606.ENSP00000296215	9606.ENSP00000326261	0	0	0	0	0.162	0.847	0	0	0.867
SNIP1	THRAP3	9606.ENSP00000296215	9606.ENSP00000346634	0	0	0	0	0.06	0.847	0	0.411	0.908
SNIP1	SRRM2	9606.ENSP00000296215	9606.ENSP00000301740	0	0	0	0	0.095	0.965	0.9	0.328	0.997
SON	RANBP2	9606.ENSP00000348984	9606.ENSP00000283195	0	0	0	0	0.654	0.072	0	0.158	0.706
SON	PRPF4B	9606.ENSP00000348984	9606.ENSP00000337194	0	0	0	0.55	0.839	0	0	0.075	0.842
SORBS2	PALLD	9606.ENSP00000347852	9606.ENSP00000425556	0	0	0	0	0.069	0.27	0	0.686	0.768
SP100	CBX5	9606.ENSP00000343023	9606.ENSP00000209875	0	0	0	0	0.062	0.877	0	0.232	0.904
SP100	PML	9606.ENSP00000343023	9606.ENSP00000268058	0	0	0	0	0.063	0.785	0.9	0.827	0.996
SP100	RANBP2	9606.ENSP00000343023	9606.ENSP00000283195	0	0	0	0	0.067	0.488	0.9	0.489	0.972
SP100	HSP90AA1	9606.ENSP00000343023	9606.ENSP00000335153	0	0	0	0	0	0	0	0.707	0.707
SP100	HIST1H3A	9606.ENSP00000343023	9606.ENSP00000480826	0	0	0	0	0	0.821	0	0.043	0.821
SP100	PRAM1	9606.ENSP00000343023	9606.ENSP00000408342	0	0	0	0	0.065	0	0.9	0.208	0.919
SPAG9	MAPK14	9606.ENSP00000262013	9606.ENSP00000229795	0	0	0	0	0	0.329	0.6	0.77	0.933
SPAG9	MAPK8	9606.ENSP00000262013	9606.ENSP00000378974	0	0	0	0	0.062	0.372	0	0.704	0.811
SPAG9	BNIP2	9606.ENSP00000262013	9606.ENSP00000267859	0	0	0	0	0.062	0	0.6	0.544	0.814
SPAG9	AKT1	9606.ENSP00000262013	9606.ENSP00000451828	0	0	0	0	0	0.057	0	0.893	0.895
SPTAN1	VASP	9606.ENSP00000361824	9606.ENSP00000245932	0	0	0	0	0	0.078	0	0.932	0.934
SPTAN1	PXN	9606.ENSP00000361824	9606.ENSP00000267257	0	0	0	0	0.057	0.066	0.9	0.193	0.919
SPTAN1	EPB41L2	9606.ENSP00000361824	9606.ENSP00000338481	0	0	0	0	0.174	0.296	0.72	0.341	0.878
SPTAN1	EPB41L3	9606.ENSP00000361824	9606.ENSP00000343158	0	0	0	0	0.158	0.125	0	0.84	0.872
SPTAN1	SPTBN1	9606.ENSP00000361824	9606.ENSP00000349259	0	0	0	0.675	0.907	0.971	0.72	0.985	0.999
SPTBN1	DBN1	9606.ENSP00000349259	9606.ENSP00000292385	0	0	0	0	0.062	0.725	0	0.128	0.755
SPTBN1	EPB41L2	9606.ENSP00000349259	9606.ENSP00000338481	0	0	0	0	0.183	0.176	0.72	0.221	0.833
SPTBN1	EPB41L3	9606.ENSP00000349259	9606.ENSP00000343158	0	0	0	0	0.157	0.317	0	0.879	0.925
SPTBN1	MYO18A	9606.ENSP00000349259	9606.ENSP00000437073	0	0	0	0	0.049	0.161	0.6	0.253	0.73
SPTBN1	SPTAN1	9606.ENSP00000349259	9606.ENSP00000361824	0	0	0	0.675	0.907	0.971	0.72	0.985	0.999
SRRM1	SRSF1	9606.ENSP00000326261	9606.ENSP00000258962	0	0	0	0	0.166	0.934	0.6	0.572	0.989
SRRM1	RBM25	9606.ENSP00000326261	9606.ENSP00000261973	0	0	0	0	0.453	0.769	0	0.88	0.983
SRRM1	ACIN1	9606.ENSP00000326261	9606.ENSP00000262710	0	0	0	0	0.318	0.39	0	0.447	0.75
SRRM1	RANBP2	9606.ENSP00000326261	9606.ENSP00000283195	0	0	0	0	0.11	0.354	0.6	0.158	0.78
SRRM1	SNIP1	9606.ENSP00000326261	9606.ENSP00000296215	0	0	0	0	0.162	0.847	0	0	0.867
SRRM1	SLU7	9606.ENSP00000326261	9606.ENSP00000297151	0	0	0	0	0.072	0	0.6	0.381	0.75
SRRM1	SRRM2	9606.ENSP00000326261	9606.ENSP00000301740	0	0	0	0	0.267	0.936	0.8	0.924	0.999
SRRM1	CSTF2	9606.ENSP00000326261	9606.ENSP00000362063	0	0	0	0	0.262	0.288	0.6	0.234	0.817
SRRM1	DEK	9606.ENSP00000326261	9606.ENSP00000380414	0	0	0	0	0.184	0.27	0	0.886	0.926
SRRM1	SRSF2	9606.ENSP00000326261	9606.ENSP00000376276	0	0	0	0	0.383	0.794	0.6	0.628	0.978
SRRM2	PPIG	9606.ENSP00000301740	9606.ENSP00000260970	0	0	0	0	0.126	0.826	0	0.099	0.851
SRRM2	RBM25	9606.ENSP00000301740	9606.ENSP00000261973	0	0	0	0	0.203	0.785	0	0.844	0.971
SRRM2	ACIN1	9606.ENSP00000301740	9606.ENSP00000262710	0	0	0	0	0.775	0.681	0	0.432	0.955
SRRM2	SNIP1	9606.ENSP00000301740	9606.ENSP00000296215	0	0	0	0	0.095	0.965	0.9	0.328	0.997
SRRM2	SLU7	9606.ENSP00000301740	9606.ENSP00000297151	0	0	0	0	0.082	0.872	0	0.506	0.937
SRRM2	PRPF40A	9606.ENSP00000301740	9606.ENSP00000386458	0	0	0	0	0.197	0.678	0	0.304	0.804
SRRM2	SRRM1	9606.ENSP00000301740	9606.ENSP00000326261	0	0	0	0	0.267	0.936	0.8	0.924	0.999
SRSF1	PIAS1	9606.ENSP00000258962	9606.ENSP00000249636	0	0	0	0	0.064	0.27	0	0.884	0.914
SRSF1	POLR2A	9606.ENSP00000258962	9606.ENSP00000480158	0	0	0	0	0.073	0.182	0.6	0.247	0.741
SRSF1	NPM1	9606.ENSP00000258962	9606.ENSP00000296930	0	0	0	0	0.173	0.664	0	0.224	0.766
SRSF1	CSTF2	9606.ENSP00000258962	9606.ENSP00000362063	0	0	0	0	0.128	0	0.6	0.402	0.773
SRSF1	CBX3	9606.ENSP00000258962	9606.ENSP00000336687	0	0	0	0	0.344	0	0	0.71	0.802
SRSF1	RBM25	9606.ENSP00000258962	9606.ENSP00000261973	0	0	0	0	0.342	0.653	0	0.481	0.871
SRSF1	SLU7	9606.ENSP00000258962	9606.ENSP00000297151	0	0	0	0	0.062	0.144	0.8	0.416	0.893
SRSF1	HNRNPA3	9606.ENSP00000258962	9606.ENSP00000376309	0	0	0.257	0	0.665	0.368	0	0.409	0.894
SRSF1	HNRNPU	9606.ENSP00000258962	9606.ENSP00000283179	0	0	0	0	0.764	0.221	0	0.51	0.902
SRSF1	HNRNPK	9606.ENSP00000258962	9606.ENSP00000365439	0	0	0	0	0.95	0.451	0	0.579	0.987
SRSF1	SRRM1	9606.ENSP00000258962	9606.ENSP00000326261	0	0	0	0	0.166	0.934	0.6	0.572	0.989
SRSF1	HNRNPH1	9606.ENSP00000258962	9606.ENSP00000349168	0	0	0	0	0.96	0.441	0	0.692	0.992
SRSF1	SRSF2	9606.ENSP00000258962	9606.ENSP00000376276	0	0	0.232	0.677	0.469	0.934	0.8	0.93	0.995
SRSF1	HNRNPA1	9606.ENSP00000258962	9606.ENSP00000341826	0	0	0.297	0	0.953	0.347	0	0.839	0.996
SRSF2	SRSF1	9606.ENSP00000376276	9606.ENSP00000258962	0	0	0.232	0.677	0.469	0.934	0.8	0.93	0.995
SRSF2	RBM25	9606.ENSP00000376276	9606.ENSP00000261973	0	0	0	0	0.462	0	0	0.521	0.731
SRSF2	NPM1	9606.ENSP00000376276	9606.ENSP00000296930	0	0	0	0	0.149	0.152	0	0.657	0.73
SRSF2	SLU7	9606.ENSP00000376276	9606.ENSP00000297151	0	0	0	0	0.062	0.349	0.8	0.28	0.9
SRSF2	SRRM1	9606.ENSP00000376276	9606.ENSP00000326261	0	0	0	0	0.383	0.794	0.6	0.628	0.978
SRSF2	PRPF4B	9606.ENSP00000376276	9606.ENSP00000337194	0	0	0	0	0.116	0.056	0	0.723	0.749
SRSF2	HNRNPH1	9606.ENSP00000376276	9606.ENSP00000349168	0	0	0	0	0.348	0.151	0	0.736	0.841
SRSF2	CSTF2	9606.ENSP00000376276	9606.ENSP00000362063	0	0	0	0	0.318	0.255	0.6	0.369	0.854
SRSF2	POLR2A	9606.ENSP00000376276	9606.ENSP00000480158	0	0	0	0	0.18	0.439	0.6	0.443	0.883
STK4	MAP1B	9606.ENSP00000361892	9606.ENSP00000296755	0	0	0	0	0.146	0.69	0	0	0.724
STK4	FOXO1	9606.ENSP00000361892	9606.ENSP00000368880	0	0	0	0	0	0.27	0.8	0.369	0.899
STK4	YAP1	9606.ENSP00000361892	9606.ENSP00000478927	0	0	0	0	0.063	0.694	0.65	0.803	0.977
STUB1	PSMA3	9606.ENSP00000219548	9606.ENSP00000216455	0	0	0	0	0.072	0.865	0	0.062	0.872
STUB1	UBA1	9606.ENSP00000219548	9606.ENSP00000338413	0	0	0	0	0.115	0.488	0	0.468	0.738
STUB1	AKT1	9606.ENSP00000219548	9606.ENSP00000451828	0	0	0	0	0.077	0.519	0	0.633	0.823
STUB1	PTGES3	9606.ENSP00000219548	9606.ENSP00000482075	0	0	0	0	0.073	0.27	0.54	0.564	0.846
STUB1	ERBB2IP	9606.ENSP00000219548	9606.ENSP00000426632	0	0	0	0	0	0.056	0.9	0	0.901
STUB1	MYC	9606.ENSP00000219548	9606.ENSP00000479618	0	0	0	0	0	0.675	0	0.715	0.903
STUB1	HSP90AB1	9606.ENSP00000219548	9606.ENSP00000360609	0	0	0	0	0.082	0.684	0.54	0.736	0.96
STUB1	HSP90AA1	9606.ENSP00000219548	9606.ENSP00000335153	0	0	0	0	0.089	0.914	0.9	0.99	0.999
SYNPO2	ZYX	9606.ENSP00000306015	9606.ENSP00000324422	0	0	0	0	0	0.138	0	0.678	0.712
TAF12	POLR2A	9606.ENSP00000263974	9606.ENSP00000480158	0	0	0	0	0.063	0.075	0.6	0.468	0.791
TAF12	MYC	9606.ENSP00000263974	9606.ENSP00000479618	0	0	0	0	0	0.316	0.9	0.314	0.948
TAGLN2	VCL	9606.ENSP00000357076	9606.ENSP00000211998	0	0	0	0	0.084	0	0.9	0.3	0.93
TAGLN2	CFL1	9606.ENSP00000357076	9606.ENSP00000432660	0	0	0	0	0.156	0.429	0	0.436	0.705
TAGLN2	FLNA	9606.ENSP00000357076	9606.ENSP00000358866	0	0	0	0	0.208	0.167	0.9	0.307	0.948
THRAP3	EP300	9606.ENSP00000346634	9606.ENSP00000263253	0	0	0	0	0.065	0.129	0.8	0.087	0.831
THRAP3	SNIP1	9606.ENSP00000346634	9606.ENSP00000296215	0	0	0	0	0.06	0.847	0	0.411	0.908
THRAP3	NCOA1	9606.ENSP00000346634	9606.ENSP00000385216	0	0	0	0	0	0	0.8	0.074	0.806
THRAP3	NCOA3	9606.ENSP00000346634	9606.ENSP00000361066	0	0	0	0	0.042	0	0.8	0.09	0.81
TLE3	EP300	9606.ENSP00000452871	9606.ENSP00000263253	0	0	0	0	0.065	0	0.8	0.272	0.852
TLE3	HDAC1	9606.ENSP00000452871	9606.ENSP00000362649	0	0	0	0	0.099	0.651	0.6	0.861	0.98
TLE3	HDAC2	9606.ENSP00000452871	9606.ENSP00000430432	0	0	0	0	0.073	0.344	0	0.603	0.737
TLK1	RAD9A	9606.ENSP00000411099	9606.ENSP00000311360	0	0	0	0	0	0.27	0	0.918	0.938
TMPO	USP7	9606.ENSP00000266732	9606.ENSP00000343535	0	0	0	0	0.08	0.681	0	0.072	0.704
TMPO	ERBB2IP	9606.ENSP00000266732	9606.ENSP00000426632	0	0	0	0	0	0	0	0.72	0.72
TMPO	LBR	9606.ENSP00000266732	9606.ENSP00000339883	0	0	0	0	0.209	0	0	0.696	0.749
TMX1	CANX	9606.ENSP00000393316	9606.ENSP00000247461	0	0	0	0	0.218	0.429	0	0.553	0.784
TNIK	MAP4K4	9606.ENSP00000399511	9606.ENSP00000343658	0	0	0	0.969	0.273	0.103	0.9	0.681	0.93
TNIK	MINK1	9606.ENSP00000399511	9606.ENSP00000347427	0	0	0	0.964	0	0	0.9	0.6	0.902
TNIP1	NFKB1	9606.ENSP00000317891	9606.ENSP00000226574	0	0	0	0	0.149	0.68	0	0.472	0.843
TNKS1BP1	FNBP1	9606.ENSP00000437271	9606.ENSP00000413625	0	0	0	0	0	0	0	0.72	0.72
TP53BP1	MSH6	9606.ENSP00000371475	9606.ENSP00000234420	0	0	0	0	0.212	0	0.36	0.464	0.706
TP53BP1	TRIM28	9606.ENSP00000371475	9606.ENSP00000253024	0	0	0	0	0.049	0.687	0.9	0.422	0.98
TP53BP1	PML	9606.ENSP00000371475	9606.ENSP00000268058	0	0	0	0	0.049	0.654	0	0.244	0.729
TP53BP1	RAD9A	9606.ENSP00000371475	9606.ENSP00000311360	0	0	0	0	0.049	0.528	0	0.756	0.881
TP53BP1	SMC3	9606.ENSP00000371475	9606.ENSP00000354720	0	0	0	0	0.499	0.134	0.9	0.325	0.966
TP53BP1	RBL1	9606.ENSP00000371475	9606.ENSP00000362768	0	0	0	0	0.344	0.297	0	0.444	0.721
TP53BP1	HIST1H3A	9606.ENSP00000371475	9606.ENSP00000480826	0	0	0	0	0	0.69	0	0.163	0.73
TP53BP1	MCM3	9606.ENSP00000371475	9606.ENSP00000480987	0	0	0	0	0.65	0.186	0	0.266	0.773
TPD52	TPD52L2	9606.ENSP00000429309	9606.ENSP00000217121	0	0	0	0.915	0	0.752	0	0.904	0.771
TPD52L2	TPD52	9606.ENSP00000217121	9606.ENSP00000429309	0	0	0	0.915	0	0.752	0	0.904	0.771
TRIM28	CBX5	9606.ENSP00000253024	9606.ENSP00000209875	0	0	0	0	0.086	0.91	0	0.889	0.99
TRIM28	SMARCC1	9606.ENSP00000253024	9606.ENSP00000254480	0	0	0	0	0.232	0.501	0	0.316	0.715
TRIM28	CHD4	9606.ENSP00000253024	9606.ENSP00000349508	0	0	0	0	0.33	0.494	0	0.335	0.755
TRIM28	PML	9606.ENSP00000253024	9606.ENSP00000268058	0	0	0	0.546	0	0	0.9	0.518	0.922
TRIM28	DNMT1	9606.ENSP00000253024	9606.ENSP00000352516	0	0	0	0	0.142	0.682	0	0.844	0.953
TRIM28	CBX3	9606.ENSP00000253024	9606.ENSP00000336687	0	0	0	0	0.106	0.884	0	0.679	0.964
TRIM28	TP53BP1	9606.ENSP00000253024	9606.ENSP00000371475	0	0	0	0	0.049	0.687	0.9	0.422	0.98
TRIM28	HDAC1	9606.ENSP00000253024	9606.ENSP00000362649	0	0	0	0	0.226	0.686	0.9	0.867	0.996
TRIM28	CBX1	9606.ENSP00000253024	9606.ENSP00000377060	0	0	0	0	0.062	0.898	0.9	0.864	0.998
TSC22D4	NRBP1	9606.ENSP00000300181	9606.ENSP00000233557	0	0	0	0	0	0.787	0	0.477	0.884
UBA1	STUB1	9606.ENSP00000338413	9606.ENSP00000219548	0	0	0	0	0.115	0.488	0	0.468	0.738
UBXN1	NSFL1C	9606.ENSP00000294119	9606.ENSP00000418529	0	0	0	0	0.096	0.405	0.8	0.773	0.972
USP7	EP300	9606.ENSP00000343535	9606.ENSP00000263253	0	0	0	0	0.122	0.092	0.6	0.403	0.784
USP7	TMPO	9606.ENSP00000343535	9606.ENSP00000266732	0	0	0	0	0.08	0.681	0	0.072	0.704
USP7	PML	9606.ENSP00000343535	9606.ENSP00000268058	0	0	0	0	0	0.622	0	0.346	0.742
USP7	POLR2A	9606.ENSP00000343535	9606.ENSP00000480158	0	0	0	0	0.146	0.078	0.6	0.16	0.7
USP7	HMGN1	9606.ENSP00000343535	9606.ENSP00000370125	0	0	0	0	0	0	0.6	0.31	0.712
USP7	HDAC1	9606.ENSP00000343535	9606.ENSP00000362649	0	0	0	0	0.097	0.486	0	0.575	0.786
USP7	OTUD4	9606.ENSP00000343535	9606.ENSP00000409279	0	0	0	0	0.062	0.27	0	0.77	0.829
USP7	FOXO1	9606.ENSP00000343535	9606.ENSP00000368880	0	0	0	0	0	0.057	0.8	0.27	0.85
USP7	DNMT1	9606.ENSP00000343535	9606.ENSP00000352516	0	0	0	0	0.063	0.977	0	0.988	0.999
USP8	AKT1	9606.ENSP00000379721	9606.ENSP00000451828	0	0	0	0	0.055	0.281	0.9	0.267	0.943
VASP	VCL	9606.ENSP00000245932	9606.ENSP00000211998	0	0	0	0	0.062	0.494	0	0.989	0.994
VASP	CFL1	9606.ENSP00000245932	9606.ENSP00000432660	0	0	0	0	0.088	0	0	0.702	0.717
VASP	PXN	9606.ENSP00000245932	9606.ENSP00000267257	0	0	0	0	0.085	0	0	0.74	0.752
VASP	ABI1	9606.ENSP00000245932	9606.ENSP00000365312	0	0	0	0	0.065	0.533	0	0.745	0.879
VASP	PALLD	9606.ENSP00000245932	9606.ENSP00000425556	0	0	0	0	0	0	0	0.927	0.927
VASP	SPTAN1	9606.ENSP00000245932	9606.ENSP00000361824	0	0	0	0	0	0.078	0	0.932	0.934
VASP	FYB	9606.ENSP00000245932	9606.ENSP00000427114	0	0	0	0	0.053	0.27	0.6	0.885	0.964
VASP	EVL	9606.ENSP00000245932	9606.ENSP00000376652	0	0	0	0.912	0	0.871	0.8	0.798	0.974
VASP	ZYX	9606.ENSP00000245932	9606.ENSP00000324422	0	0	0	0	0.212	0.781	0.9	0.989	0.999
VCL	AKT1	9606.ENSP00000211998	9606.ENSP00000451828	0	0	0	0	0.063	0	0	0.712	0.719
VCL	MYH11	9606.ENSP00000211998	9606.ENSP00000379616	0	0	0	0	0.064	0.154	0.6	0.462	0.807
VCL	MAPK3	9606.ENSP00000211998	9606.ENSP00000263025	0	0	0	0	0	0.14	0.6	0.596	0.849
VCL	TAGLN2	9606.ENSP00000211998	9606.ENSP00000357076	0	0	0	0	0.084	0	0.9	0.3	0.93
VCL	FN1	9606.ENSP00000211998	9606.ENSP00000346839	0	0	0	0	0.086	0.074	0.5	0.966	0.984
VCL	FLNA	9606.ENSP00000211998	9606.ENSP00000358866	0	0	0	0	0.556	0.149	0.9	0.678	0.986
VCL	RAVER1	9606.ENSP00000211998	9606.ENSP00000293677	0	0	0	0	0	0.932	0	0.872	0.991
VCL	VASP	9606.ENSP00000211998	9606.ENSP00000245932	0	0	0	0	0.062	0.494	0	0.989	0.994
VCL	ZYX	9606.ENSP00000211998	9606.ENSP00000324422	0	0	0	0	0.153	0.18	0.9	0.977	0.998
VCL	PXN	9606.ENSP00000211998	9606.ENSP00000267257	0	0	0	0	0.097	0.914	0.9	0.994	0.999
VGLL4	IRF2BPL	9606.ENSP00000404251	9606.ENSP00000238647	0	0	0	0	0	0.723	0	0.126	0.747
VGLL4	IRF2BP1	9606.ENSP00000404251	9606.ENSP00000307265	0	0	0	0	0	0.69	0	0.277	0.766
VGLL4	YAP1	9606.ENSP00000404251	9606.ENSP00000478927	0	0	0	0	0.063	0.27	0	0.605	0.706
WNK1	ITSN1	9606.ENSP00000341292	9606.ENSP00000370719	0	0	0	0	0.062	0	0	0.789	0.793
XRN2	MPHOSPH10	9606.ENSP00000366396	9606.ENSP00000244230	0	0	0	0	0.15	0	0.9	0	0.911
XRN2	NSUN2	9606.ENSP00000366396	9606.ENSP00000264670	0	0	0	0	0.072	0.789	0	0.514	0.896
XRN2	CSTF2	9606.ENSP00000366396	9606.ENSP00000362063	0	0	0	0	0.153	0.14	0	0.633	0.709
XRN2	SCAF8	9606.ENSP00000366396	9606.ENSP00000413098	0	0	0	0	0.394	0.305	0	0.378	0.715
XRN2	POLR2A	9606.ENSP00000366396	9606.ENSP00000480158	0	0	0	0	0.173	0.535	0	0.611	0.837
YAP1	SLC9A3R1	9606.ENSP00000478927	9606.ENSP00000262613	0	0	0	0	0	0.333	0	0.595	0.719
YAP1	EP300	9606.ENSP00000478927	9606.ENSP00000263253	0	0	0	0	0.062	0.319	0	0.816	0.872
YAP1	PML	9606.ENSP00000478927	9606.ENSP00000268058	0	0	0	0	0.049	0.281	0.9	0.1	0.93
YAP1	STK4	9606.ENSP00000478927	9606.ENSP00000361892	0	0	0	0	0.063	0.694	0.65	0.803	0.977
YAP1	VGLL4	9606.ENSP00000478927	9606.ENSP00000404251	0	0	0	0	0.063	0.27	0	0.605	0.706
YTHDC1	ALKBH5	9606.ENSP00000339245	9606.ENSP00000382091	0	0	0	0	0.059	0	0	0.89	0.892
ZC3H4	RBM26	9606.ENSP00000253048	9606.ENSP00000483408	0	0	0	0	0.136	0.226	0	0.595	0.705
ZNF609	NIPBL	9606.ENSP00000316527	9606.ENSP00000282516	0	0	0	0	0.062	0	0.72	0.141	0.754
ZYX	VCL	9606.ENSP00000324422	9606.ENSP00000211998	0	0	0	0	0.153	0.18	0.9	0.977	0.998
ZYX	VASP	9606.ENSP00000324422	9606.ENSP00000245932	0	0	0	0	0.212	0.781	0.9	0.989	0.999
ZYX	PXN	9606.ENSP00000324422	9606.ENSP00000267257	0	0	0	0.584	0.118	0.217	0.9	0.952	0.954
ZYX	SYNPO2	9606.ENSP00000324422	9606.ENSP00000306015	0	0	0	0	0	0.138	0	0.678	0.712
ZYX	FN1	9606.ENSP00000324422	9606.ENSP00000346839	0	0	0	0	0.062	0.271	0	0.632	0.727
ZYX	EVL	9606.ENSP00000324422	9606.ENSP00000376652	0	0	0	0	0.062	0.675	0	0.547	0.849

## Sheet: Interactions medium confidence
AKT1	ERK1 (MAPK3)	JNK1 (MAPK8)	p38 MAPK (MAPK14)
VCL	VCL	NFKB1	CDK13
MYH9	STUB1	MAPK14	NFKB1
STUB1	NFKB1	HSPB1	PXN
NFKB1	MAPK14	SPAG9	LCP1
PRKAB1	CANX	EP300	HDAC1
MAPK14	HSPB1	PXN	HSP90AB1
VASP	TRIM28	MAP1B	FN1
CANX	CIC	HSP90AA1	PTPRC
HSPB1	IRF3	FN1	FLNA
ARHGEF6	NES	FLNA	AKAP13
WDR44	YAP1	BCL10	HSP90AA1
DOCK2	HDAC2	NCOA3	BCL10
SRSF1	HDAC1	HDAC1	BNIP2
PPIG	CFL1	FOXO1	FOXO1
SPAG9	FLNA	YAP1	LSP1
SLC9A3R1	AKT1S1	IRF3	NFATC2
EP300	GTF2I	MYC	SPAG9
SLC9A1	MEF2C	NFATC2	SLC9A1
PXN	PTPRC		MYC
PML	HNRNPK		MEF2C
EIF2B5	EP300		EP300
LAMTOR1	BCL10		NCOA3
PDCD4	NFATC2		HSPB1
NPM1	FN1
PA2G4	SLC9A1
ARHGAP1	FOXO1
EPSTI1	IKZF3
EML4	PTGES3
ZYX	ABI1
FMNL1	PRKAR1A
HSP90AA1	PRKAR2B
MEF2C	HSP90AB1
HNRNPA1	PXN
USP7	MYC
FN1	HSP90AA1
TFEB	PEA15
CD2AP
DNMT1
PEA15
NES
CRTC2
DKC1
FLNA
BCL10
HSP90AB1
NCOA3
STK4
HDAC1
ABI1
FOXO1
TP53BP1
AKT1S1
NFATC2
USP8
LCP1
PPP1R12A
PTPRC
PALLD
HDAC2
CFL1
MARCKS
GTF2I
ACACA
PACSIN1
IRF3
YAP1
DENND1B
PTGES3
MYC

## Sheet: Interactions high confidence
AKT1	ERK1 (MAPK3)	JNK1 (MAPK8)	p38 MAPK (MAPK14)
VCL	VCL	NFKB1	NFKB1
STUB1	NFKB1	MAPK14	FOXO1
NFKB1	MAPK14	SPAG9	LSP1
MAPK14	EP300	EP300	NFATC2
HSPB1	BCL10	PXN	SPAG9
DOCK2	NFATC2	FLNA	SLC9A1
SPAG9	FN1	BCL10	MYC
EP300	SLC9A1	NCOA3	MEF2C
PXN	FOXO1	FOXO1	EP300
PML	IKZF3	MYC	NCOA3
LAMTOR1	PTGES3	NFATC2	HSPB1
NPM1	ABI1
PA2G4	PRKAR1A
FMNL1	PRKAR2B
HSP90AA1	HSP90AB1
MEF2C	PXN
FN1	MYC
CRTC2	HSP90AA1
DKC1	PEA15
BCL10
HSP90AB1
ABI1
FOXO1
AKT1S1
USP8
CFL1
DENND1B
PTGES3
MYC

## Sheet: Combined Table
Kinase	AKT1	AKT1	ERK1 (MAPK3)	ERK1 (MAPK3)	JNK1 (MAPK8)	JNK1 (MAPK8)	p38 MAPK (MAPK14)	p38 MAPK (MAPK14)
Confidence Setting	Medium	High	Medium	High	Medium	High	Medium	High
Interacting proteins	ABI1	ABI1	ABI1	ABI1	BCL10	BCL10	AKAP13	EP300
	ACACA	AKT1S1	AKT1S1	BCL10	EP300	EP300	BCL10	FOXO1
	AKT1S1	BCL10	BCL10	EP300	FLNA	FLNA	BNIP2	HSPB1
	ARHGAP1	CFL1	CANX	FN1	FN1	FOXO1	CDK13	LSP1
	ARHGEF6	CRTC2	CFL1	FOXO1	FOXO1	MAPK14	EP300	MEF2C
	BCL10	DENND1B	CIC	HSP90AA1	HDAC1	MYC	FLNA	MYC
	CANX	DKC1	EP300	HSP90AB1	HSP90AA1	NCOA3	FN1	NCOA3
	CD2AP	DOCK2	FLNA	IKZF3	HSPB1	NFATC2	FOXO1	NFATC2
	CFL1	EP300	FN1	MAPK14	IRF3	NFKB1	HDAC1	NFKB1
	CRTC2	FMNL1	FOXO1	MYC	MAP1B	PXN	HSP90AA1	SLC9A1
	DENND1B	FN1	GTF2I	NFATC2	MAPK14	SPAG9	HSP90AB1	SPAG9
	DKC1	FOXO1	HDAC1	NFKB1	MYC		HSPB1
	DNMT1	HSP90AA1	HDAC2	PEA15	NCOA3		LCP1
	DOCK2	HSP90AB1	HNRNPK	PRKAR1A	NFATC2		LSP1
	EIF2B5	HSPB1	HSP90AA1	PRKAR2B	NFKB1		MEF2C
	EML4	LAMTOR1	HSP90AB1	PTGES3	PXN		MYC
	EP300	MAPK14	HSPB1	PXN	SPAG9		NCOA3
	EPSTI1	MEF2C	IKZF3	SLC9A1	YAP1		NFATC2
	FLNA	MYC	IRF3	VCL			NFKB1
	FMNL1	NFKB1	MAPK14				PTPRC
	FN1	NPM1	MEF2C				PXN
	FOXO1	PA2G4	MYC				SLC9A1
	GTF2I	PML	NES				SPAG9
	HDAC1	PTGES3	NFATC2
	HDAC2	PXN	NFKB1
	HNRNPA1	SPAG9	PEA15
	HSP90AA1	STUB1	PRKAR1A
	HSP90AB1	USP8	PRKAR2B
	HSPB1	VCL	PTGES3
	IRF3		PTPRC
	LAMTOR1		PXN
	LCP1		SLC9A1
	MAPK14		STUB1
	MARCKS		TRIM28
	MEF2C		VCL
	MYC		YAP1
	MYH9
	NCOA3
	NES
	NFATC2
	NFKB1
	NPM1
	PA2G4
	PACSIN1
	PALLD
	PDCD4
	PEA15
	PML
	PPIG
	PPP1R12A
	PRKAB1
	PTGES3
	PTPRC
	PXN
	SLC9A1
	SLC9A3R1
	SPAG9
	SRSF1
	STK4
	STUB1
	TFEB
	TP53BP1
	USP7
	USP8
	VASP
	VCL
	WDR44
	YAP1
	ZYX
