# Supplementary material for: Up-regulation of the PI3K/AKT and RHO/RAC/PAK signalling pathways in CHK1 inhibitor resistant Eµ-Myc lymphoma cells
Source: Biochem J. 2022 Oct 14;479(19):2131–51. doi: 10.1042/BCJ20220103 (PMC9704644; doi:10.1042/BCJ20220103)
Supplement: Supplementary Material 6 [file BCJ-479-2131-s6.pdf]

## Sheet: Description
Supp Data File 5. RNA Seq analysis of Eμ-Myc lymphomas.
Each tab shows a different comparison between reimplanted Eμ-Myc lymphoma samples from either wild type, Rel-/- or RelAT505A mice.

## Sheet: c-Rel_CHK1i_vs_c-Rel control
Gene	baseMean	log2FoldChange	lfcSE	stat	pvalue	padj	ensembl_geneid	entrez	symbol	chr	start	end	strand	biotype	description	Panther.Class.1	Panther.Class.2	Panther.Class.3	GeneID
ENSMUSG00000066632	18.9426	-21.4972	5.44609	-3.94727	NA	NA	ENSMUSG00000066632	NA	Pgk1-rs7	12	10898986	10900240	-1	processed_pseudogene	phosphoglycerate kinase-1, related sequence-7 [Source:MGI Symbol;Acc:MGI:97562]	NA	NA	NA	ENSMUSG00000066632
ENSMUSG00000112022	8.01703	-20.251	5.44661	-3.7181	0.000200724	0.205244	ENSMUSG00000112022	NA	AC157515.1	12	55142109	55151007	-1	unprocessed_pseudogene		NA	NA	NA	ENSMUSG00000112022
ENSMUSG00000089739	43.443	-19.8084	5.44682	-3.63669	0.000276162	0.209131	ENSMUSG00000089739	NA	Gm20431	2	167607850	167661496	-1	protein_coding	predicted gene 20431 [Source:MGI Symbol;Acc:MGI:5141896]	NA	NA	NA	ENSMUSG00000089739
ENSMUSG00000087635	28.3034	-19.3535	4.28521	-4.51636	6.29131e-06	0.0172704	ENSMUSG00000087635	NA	Gm13414	2	34649514	34650240	-1	processed_pseudogene	predicted gene 13414 [Source:MGI Symbol;Acc:MGI:3652154]	NA	NA	NA	ENSMUSG00000087635
ENSMUSG00000099908	119.979	-19.1589	1.85258	-10.3417	4.56178e-25	1.00181e-20	ENSMUSG00000099908	NA	Gm28539	16	18836584	18956247	1	protein_coding	predicted gene 28539 [Source:MGI Symbol;Acc:MGI:5579245]	NA	NA	NA	ENSMUSG00000099908
ENSMUSG00000095588	22.6226	-18.8023	5.44736	-3.45164	0.0005572	0.359902	ENSMUSG00000095588	NA	Gm12350	4	34485832	34486293	1	processed_pseudogene	predicted gene 12350 [Source:MGI Symbol;Acc:MGI:3649478]	NA	NA	NA	ENSMUSG00000095588
ENSMUSG00000079620	1.62834	-5.78899	5.44882	-1.06243	NA	NA	ENSMUSG00000079620	140474	Muc4	16	32735886	32782391	1	protein_coding	mucin 4 [Source:MGI Symbol;Acc:MGI:2153525]	NA	NA	NA	ENSMUSG00000079620
ENSMUSG00000113451	3.13333	-5.2323	5.11889	-1.02215	0.306708	1	ENSMUSG00000113451	NA	AC153662.1	12	23465695	23465964	1	processed_pseudogene		NA	NA	NA	ENSMUSG00000113451
ENSMUSG00000067869	6.90213	-5.14856	4.01861	-1.28118	0.200131	1	ENSMUSG00000067869	NA	Tcea1-ps1	15	90882615	90883518	1	processed_pseudogene	transcription elongation factor A (SII) 1, pseudogene 1 [Source:MGI Symbol;Acc:MGI:1861432]	NA	NA	NA	ENSMUSG00000067869
ENSMUSG00000087034	2.1956	-4.99278	5.4512	-0.915906	0.359716	1	ENSMUSG00000087034	NA	Cbfa2t2-ps1	5	60231483	60232212	1	processed_pseudogene	core-binding factor, runt domain, alpha subunit 2; translocated to, (human), pseudogene 1 [Source:MGI Symbol;Acc:MGI:1333788]	NA	NA	NA	ENSMUSG00000087034
ENSMUSG00000085865	0.922959	-4.9273	5.45146	-0.903849	NA	NA	ENSMUSG00000085865	NA	Gm15966	16	91320452	91328995	-1	lincRNA	predicted gene 15966 [Source:MGI Symbol;Acc:MGI:3802004]	NA	NA	NA	ENSMUSG00000085865
ENSMUSG00000075025	5.4352	-4.86895	2.76334	-1.76198	0.0780726	1	ENSMUSG00000075025	NA	Gm10804	2	93452819	93469871	1	lincRNA	predicted gene 10804 [Source:MGI Symbol;Acc:MGI:3641755]	NA	NA	NA	ENSMUSG00000075025
ENSMUSG00000086645	17.3167	-4.8499	1.49765	-3.23834	0.00120228	0.571521	ENSMUSG00000086645	NA	Gm15743	16	31427876	31429776	-1	antisense_RNA	predicted gene 15743 [Source:MGI Symbol;Acc:MGI:3783185]	NA	NA	NA	ENSMUSG00000086645
ENSMUSG00000046687	6.03951	-4.81756	1.30065	-3.70397	0.000212252	0.205244	ENSMUSG00000046687	NA	Gm5424	10	62071123	62072362	1	processed_pseudogene	predicted gene 5424 [Source:MGI Symbol;Acc:MGI:3643173]	NA	NA	NA	ENSMUSG00000046687
ENSMUSG00000102805	1.02054	-4.64493	3.64532	-1.27422	0.202586	1	ENSMUSG00000102805	99889	Gm37240	3	84496426	85887518	-1	protein_coding	predicted gene, 37240 [Source:MGI Symbol;Acc:MGI:5610468]	G-protein modulator(PC00022)	NA	NA	ENSMUSG00000102805
ENSMUSG00000107271	1.10881	-4.64452	5.45273	-0.85178	0.394336	1	ENSMUSG00000107271	NA	BC028471	5	149367636	149393596	1	lincRNA	cDNA sequence BC028471 [Source:MGI Symbol;Acc:MGI:3041249]	NA	NA	NA	ENSMUSG00000107271
ENSMUSG00000049891	8.53913	-4.63154	3.81524	-1.21396	0.224764	1	ENSMUSG00000049891	NA	Gm7984	8	75398511	75399048	1	processed_pseudogene	predicted gene 7984 [Source:MGI Symbol;Acc:MGI:3645839]	NA	NA	NA	ENSMUSG00000049891
ENSMUSG00000091071	9.78898	-4.57086	2.21809	-2.06072	NA	NA	ENSMUSG00000091071	NA	1700030C10Rik	12	20814257	20815727	-1	transcribed_unprocessed_pseudogene	RIKEN cDNA 1700030C10 gene [Source:MGI Symbol;Acc:MGI:1916763]	NA	NA	NA	ENSMUSG00000091071
ENSMUSG00000114942	2.08794	-4.52664	5.45333	-0.830069	0.4065	1	ENSMUSG00000114942	NA	Lats2	14	57642077	57746103	-1	protein_coding	large tumor suppressor 2 [Source:MGI Symbol;Acc:MGI:1354386]	NA	NA	NA	ENSMUSG00000114942
ENSMUSG00000116992	0.865517	-4.50989	5.14471	-0.876608	0.3807	NA	ENSMUSG00000116992	NA	NA	NA	NA	NA	NA	NA	NA	NA	NA	NA	ENSMUSG00000116992
ENSMUSG00000035451	0.63825	-4.4911	5.45353	-0.823522	0.410211	NA	ENSMUSG00000035451	15375	Foxa1	12	57540628	57546916	-1	protein_coding	forkhead box A1 [Source:MGI Symbol;Acc:MGI:1347472]	DNA binding protein(PC00009)	winged helix/forkhead transcription factor(PC00246)	NA	ENSMUSG00000035451
ENSMUSG00000085998	2.18987	-4.47912	2.2542	-1.98701	0.0469211	1	ENSMUSG00000085998	NA	AW822252	X	53695855	53716773	-1	transcribed_unprocessed_pseudogene	expressed sequence AW822252 [Source:MGI Symbol;Acc:MGI:2148030]	NA	NA	NA	ENSMUSG00000085998
ENSMUSG00000060985	5.5973	-4.42022	1.96785	-2.24622	0.02469	1	ENSMUSG00000060985	214575	Tdrd5	1	156255296	156303664	-1	protein_coding	tudor domain containing 5 [Source:MGI Symbol;Acc:MGI:2684949]	nuclease(PC00170)	NA	NA	ENSMUSG00000060985
ENSMUSG00000075359	0.573724	-4.33701	5.45442	-0.795136	0.426534	NA	ENSMUSG00000075359	NA	Gm20775	Y	10641257	10643107	-1	unprocessed_pseudogene	predicted gene, 20775 [Source:MGI Symbol;Acc:MGI:5434131]	NA	NA	NA	ENSMUSG00000075359
ENSMUSG00000085684	1.26477	-4.32976	3.95357	-1.09515	0.27345	1	ENSMUSG00000085684	NA	4930469K13Rik	11	33973961	34098554	-1	protein_coding	RIKEN cDNA 4930469K13 gene [Source:MGI Symbol;Acc:MGI:1924124]	NA	NA	NA	ENSMUSG00000085684
ENSMUSG00000095042	3.19717	-4.32558	3.87636	-1.11589	0.26447	1	ENSMUSG00000095042	NA	Gm12537	4	57370953	57371954	-1	processed_pseudogene	predicted gene 12537 [Source:MGI Symbol;Acc:MGI:3650720]	NA	NA	NA	ENSMUSG00000095042
ENSMUSG00000107008	0.939885	-4.2921	3.97854	-1.07881	0.280671	1	ENSMUSG00000107008	NA	Gm2762	13	53393657	53455630	1	lincRNA	predicted gene 2762 [Source:MGI Symbol;Acc:MGI:3780931]	NA	NA	NA	ENSMUSG00000107008
ENSMUSG00000052951	0.654484	-4.22937	4.47103	-0.945949	0.344175	NA	ENSMUSG00000052951	NA	C130021I20Rik	2	33641193	33646354	1	antisense_RNA	Riken cDNA C130021I20 gene [Source:MGI Symbol;Acc:MGI:3639863]	NA	NA	NA	ENSMUSG00000052951
ENSMUSG00000006269	0.558989	-4.22433	5.41442	-0.7802	0.435273	NA	ENSMUSG00000006269	110935	Atp6v1b1	6	83742990	83758855	1	protein_coding	ATPase, H+ transporting, lysosomal V1 subunit B1 [Source:MGI Symbol;Acc:MGI:103285]	ATP synthase(PC00002)	DNA binding protein(PC00009)	anion channel(PC00049)	ENSMUSG00000006269
ENSMUSG00000029673	55.5019	-4.16055	1.03869	-4.00559	6.18625e-05	0.0970402	ENSMUSG00000029673	NA	Auts2	5	131437333	132543344	-1	protein_coding	autism susceptibility candidate 2 [Source:MGI Symbol;Acc:MGI:1919847]	NA	NA	NA	ENSMUSG00000029673
ENSMUSG00000094607	1.992	-4.01597	1.60411	-2.50355	0.0122955	1	ENSMUSG00000094607	NA	Trav12d-3	14	52929789	52930282	1	TR_V_gene	T cell receptor alpha variable 12D-3 [Source:MGI Symbol;Acc:MGI:3704434]	NA	NA	NA	ENSMUSG00000094607
ENSMUSG00000000385	0.779653	-3.99875	4.16921	-0.959114	0.337501	NA	ENSMUSG00000000385	50528	Tmprss2	16	97564684	97611195	-1	protein_coding	transmembrane protease, serine 2 [Source:MGI Symbol;Acc:MGI:1354381]	serine protease(PC00203)	NA	NA	ENSMUSG00000000385
ENSMUSG00000061527	2.93172	-3.99349	5.45679	-0.731839	NA	NA	ENSMUSG00000061527	110308	Krt5	15	101707070	101712891	-1	protein_coding	keratin 5 [Source:MGI Symbol;Acc:MGI:96702]	NA	NA	NA	ENSMUSG00000061527
ENSMUSG00000053164	25.6216	-3.90784	1.5419	-2.53442	0.0112633	1	ENSMUSG00000053164	338346	Gpr21	2	37516332	37520603	1	protein_coding	G protein-coupled receptor 21 [Source:MGI Symbol;Acc:MGI:2441890]	NA	NA	NA	ENSMUSG00000053164
ENSMUSG00000107018	1.00253	-3.88996	5.45763	-0.712757	0.475996	1	ENSMUSG00000107018	NA	Gm43694	5	32629842	32630960	1	TEC	predicted gene 43694 [Source:MGI Symbol;Acc:MGI:5663831]	NA	NA	NA	ENSMUSG00000107018
ENSMUSG00000086266	2.54636	-3.86775	1.99706	-1.93672	NA	NA	ENSMUSG00000086266	NA	Igf2os	7	142659693	142670356	1	antisense_RNA	insulin-like growth factor 2, opposite strand [Source:MGI Symbol;Acc:MGI:1195257]	NA	NA	NA	ENSMUSG00000086266
ENSMUSG00000064193	5.55397	-3.85885	1.84626	-2.09009	0.03661	1	ENSMUSG00000064193	NA	Gm4735	2	80837141	80838442	1	processed_pseudogene	predicted gene 4735 [Source:MGI Symbol;Acc:MGI:3645521]	NA	NA	NA	ENSMUSG00000064193
ENSMUSG00000081476	1.0653	-3.81296	5.45829	-0.698563	0.484825	1	ENSMUSG00000081476	NA	Itpa-ps1	2	94384502	94385098	-1	processed_pseudogene	inosine triphosphatase (nucleoside triphosphate pyrophosphatase) pseudogene 1 [Source:MGI Symbol;Acc:MGI:3613363]	NA	NA	NA	ENSMUSG00000081476
ENSMUSG00000110960	1.40159	-3.81183	5.4583	-0.698356	0.484955	1	ENSMUSG00000110960	NA	AC153729.2	10	31413815	31414165	-1	processed_pseudogene		NA	NA	NA	ENSMUSG00000110960
ENSMUSG00000081829	0.496543	-3.81074	2.63684	-1.44519	0.148404	NA	ENSMUSG00000081829	NA	Gm15460	3	137905009	137905399	1	processed_pseudogene	predicted gene 15460 [Source:MGI Symbol;Acc:MGI:3707338]	NA	NA	NA	ENSMUSG00000081829
ENSMUSG00000069302	1.55024	-3.8027	2.76616	-1.37472	0.169218	1	ENSMUSG00000069302	319168	Hist1h2ah	13	22035164	22035568	-1	protein_coding	histone cluster 1, H2ah [Source:MGI Symbol;Acc:MGI:2448295]	histone(PC00118)	NA	NA	ENSMUSG00000069302
ENSMUSG00000093456	1.7858	-3.80229	1.5733	-2.41676	0.0156594	1	ENSMUSG00000093456	NA	Gm20662	9	107996349	108045270	1	protein_coding	predicted gene 20662 [Source:MGI Symbol;Acc:MGI:5313109]	NA	NA	NA	ENSMUSG00000093456
ENSMUSG00000103441	0.378943	-3.73864	5.45896	-0.684864	0.49343	NA	ENSMUSG00000103441	NA	7530428D23Rik	3	21753529	21800773	-1	transcribed_processed_pseudogene	RIKEN cDNA 7530428D23 gene [Source:MGI Symbol;Acc:MGI:2442162]	NA	NA	NA	ENSMUSG00000103441
ENSMUSG00000109061	5.45773	-3.737	2.13658	-1.74906	0.0802812	1	ENSMUSG00000109061	NA	Map2k7	8	4238865	4251423	1	protein_coding	mitogen-activated protein kinase kinase 7 [Source:MGI Symbol;Acc:MGI:1346871]	NA	NA	NA	ENSMUSG00000109061
ENSMUSG00000086235	0.527133	-3.73696	5.45897	-0.684553	0.493626	NA	ENSMUSG00000086235	NA	Gm16284	1	8468426	8468825	-1	processed_pseudogene	predicted gene 16284 [Source:MGI Symbol;Acc:MGI:3826541]	NA	NA	NA	ENSMUSG00000086235
ENSMUSG00000017723	0.430961	-3.73364	4.50897	-0.828047	0.407644	NA	ENSMUSG00000017723	67701	Wfdc2	2	164562413	164568510	1	protein_coding	WAP four-disulfide core domain 2 [Source:MGI Symbol;Acc:MGI:1914951]	serine protease inhibitor(PC00204)	NA	NA	ENSMUSG00000017723
ENSMUSG00000100794	1.72932	-3.73036	1.68608	-2.21245	0.0269357	1	ENSMUSG00000100794	NA	Gm29667	1	100282791	100283280	1	processed_pseudogene	predicted gene 29667 [Source:MGI Symbol;Acc:MGI:5580373]	NA	NA	NA	ENSMUSG00000100794
ENSMUSG00000078688	0.375247	-3.72468	5.45909	-0.68229	0.495055	NA	ENSMUSG00000078688	17841	Mup2	4	60135932	60154289	-1	protein_coding	major urinary protein 2 [Source:MGI Symbol;Acc:MGI:97234]	NA	NA	NA	ENSMUSG00000078688
ENSMUSG00000095054	6.48994	-3.71545	1.35339	-2.74529	0.00604567	0.9766	ENSMUSG00000095054	NA	Gm13146	4	147187708	147188487	1	processed_pseudogene	predicted gene 13146 [Source:MGI Symbol;Acc:MGI:3651742]	NA	NA	NA	ENSMUSG00000095054
ENSMUSG00000033860	0.402603	-3.71349	5.45919	-0.680227	0.496361	NA	ENSMUSG00000033860	99571	Fgg	3	83007724	83015049	1	protein_coding	fibrinogen gamma chain [Source:MGI Symbol;Acc:MGI:95526]	signaling molecule(PC00207)	NA	NA	ENSMUSG00000033860
ENSMUSG00000085973	1.75872	-3.70084	2.83847	-1.30381	0.192297	1	ENSMUSG00000085973	NA	Gm14742	X	77802351	77803280	-1	lincRNA	predicted gene 14742 [Source:MGI Symbol;Acc:MGI:3705303]	NA	NA	NA	ENSMUSG00000085973
ENSMUSG00000038765	1.10636	-3.68303	2.73627	-1.346	0.178301	1	ENSMUSG00000038765	16917	Lmx1b	2	33560965	33640511	-1	protein_coding	LIM homeobox transcription factor 1 beta [Source:MGI Symbol;Acc:MGI:1100513]	NA	NA	NA	ENSMUSG00000038765
ENSMUSG00000065164	0.890085	-3.67332	2.68893	-1.36609	0.171912	NA	ENSMUSG00000065164	NA	Gm23814	2	119793942	119794043	-1	snRNA	predicted gene, 23814 [Source:MGI Symbol;Acc:MGI:5453591]	NA	NA	NA	ENSMUSG00000065164
ENSMUSG00000106170	0.923672	-3.65168	3.11039	-1.17403	0.240385	1	ENSMUSG00000106170	NA	Gm43393	5	60025690	60025883	-1	processed_pseudogene	predicted gene 43393 [Source:MGI Symbol;Acc:MGI:5663530]	NA	NA	NA	ENSMUSG00000106170
ENSMUSG00000036915	1.66574	-3.64528	1.71545	-2.12498	0.0335884	1	ENSMUSG00000036915	243911	Kirrel2	7	30447534	30457690	-1	protein_coding	kin of IRRE like 2 (Drosophila) [Source:MGI Symbol;Acc:MGI:2442334]	NA	NA	NA	ENSMUSG00000036915
ENSMUSG00000096824	0.557768	-3.63576	3.21683	-1.13023	0.25838	NA	ENSMUSG00000096824	NA	Ighv2-7	12	113807314	113807752	-1	IG_V_gene	immunoglobulin heavy variable 2-7 [Source:MGI Symbol;Acc:MGI:4439521]	NA	NA	NA	ENSMUSG00000096824
ENSMUSG00000082585	1.30369	-3.61692	5.46013	-0.662424	0.5077	1	ENSMUSG00000082585	NA	Gm15387	15	74093686	74094333	-1	processed_pseudogene	predicted gene 15387 [Source:MGI Symbol;Acc:MGI:3705374]	NA	NA	NA	ENSMUSG00000082585
ENSMUSG00000058626	1.48826	-3.57313	2.15764	-1.65604	0.0977141	1	ENSMUSG00000058626	268958	Capn11	17	45630204	45659325	-1	protein_coding	calpain 11 [Source:MGI Symbol;Acc:MGI:1352490]	annexin(PC00050)	calmodulin(PC00061)	cysteine protease(PC00081)	ENSMUSG00000058626
ENSMUSG00000087556	2.12703	-3.5594	1.92796	-1.8462	NA	NA	ENSMUSG00000087556	NA	Gm15764	16	18416682	18421997	1	processed_transcript	predicted gene 15764 [Source:MGI Symbol;Acc:MGI:3783206]	NA	NA	NA	ENSMUSG00000087556
ENSMUSG00000112567	1.93572	-3.54015	2.25657	-1.56882	0.11669	1	ENSMUSG00000112567	NA	CT571245.5	12	31258651	31258857	-1	processed_pseudogene		NA	NA	NA	ENSMUSG00000112567
ENSMUSG00000022582	0.820713	-3.51652	3.90032	-0.901598	0.367271	NA	ENSMUSG00000022582	546644	Ly6g	15	75155240	75159126	1	protein_coding	lymphocyte antigen 6 complex, locus G [Source:MGI Symbol;Acc:MGI:109440]	NA	NA	NA	ENSMUSG00000022582
ENSMUSG00000057092	0.555443	-3.49563	5.46141	-0.640061	0.522133	NA	ENSMUSG00000057092	17178	Fxyd3	7	31068172	31076704	-1	protein_coding	FXYD domain-containing ion transport regulator 3 [Source:MGI Symbol;Acc:MGI:107497]	enzyme modulator(PC00095)	ion channel(PC00133)	NA	ENSMUSG00000057092
ENSMUSG00000090202	0.818803	-3.49524	3.56701	-0.979881	0.327145	NA	ENSMUSG00000090202	75015	4930503B20Rik	3	146645193	146651317	-1	protein_coding	RIKEN cDNA 4930503B20 gene [Source:MGI Symbol;Acc:MGI:1922264]	NA	NA	NA	ENSMUSG00000090202
ENSMUSG00000051076	0.319125	-3.49111	5.46146	-0.639227	0.522676	NA	ENSMUSG00000051076	242122	Vtcn1	3	100825459	100896922	1	protein_coding	V-set domain containing T cell activation inhibitor 1 [Source:MGI Symbol;Acc:MGI:3039619]	protease inhibitor(PC00191)	NA	NA	ENSMUSG00000051076
ENSMUSG00000078735	1.34682	-3.44845	1.70715	-2.02	0.0433832	1	ENSMUSG00000078735	16158	Il11ra2	4	42656355	42661893	-1	protein_coding	interleukin 11 receptor, alpha chain 2 [Source:MGI Symbol;Acc:MGI:109123]	NA	NA	NA	ENSMUSG00000078735
ENSMUSG00000086074	4.85986	-3.41354	1.25391	-2.72231	0.00648282	0.9766	ENSMUSG00000086074	NA	Gm13274	4	88738838	88744294	-1	antisense_RNA	predicted gene 13274 [Source:MGI Symbol;Acc:MGI:3649443]	NA	NA	NA	ENSMUSG00000086074
ENSMUSG00000094533	2.02847	-3.39525	2.55092	-1.33099	0.183192	1	ENSMUSG00000094533	NA	Ighv11-1	12	113981879	113982341	-1	IG_V_gene	immunoglobulin heavy variable 11-1 [Source:MGI Symbol;Acc:MGI:4439535]	NA	NA	NA	ENSMUSG00000094533
ENSMUSG00000059852	3.85936	-3.38417	1.83094	-1.84833	NA	NA	ENSMUSG00000059852	240444	Kcng2	18	80294546	80364254	-1	protein_coding	potassium voltage-gated channel, subfamily G, member 2 [Source:MGI Symbol;Acc:MGI:3694646]	NA	NA	NA	ENSMUSG00000059852
ENSMUSG00000021263	0.414429	-3.37253	2.36441	-1.42638	0.15376	NA	ENSMUSG00000021263	70059	Degs2	12	108678711	108702315	-1	protein_coding	delta(4)-desaturase, sphingolipid 2 [Source:MGI Symbol;Acc:MGI:1917309]	NA	NA	NA	ENSMUSG00000021263
ENSMUSG00000062962	1.57235	-3.3647	1.21862	-2.76108	0.00576105	0.9766	ENSMUSG00000062962	NA	Gm6378	18	21076667	21077110	-1	processed_pseudogene	predicted pseudogene 6378 [Source:MGI Symbol;Acc:MGI:3647253]	NA	NA	NA	ENSMUSG00000062962
ENSMUSG00000099329	0.620851	-3.36458	5.42385	-0.62033	0.53504	NA	ENSMUSG00000099329	NA	Gm28052	17	29549799	29674187	1	processed_transcript	predicted gene, 28052 [Source:MGI Symbol;Acc:MGI:5547788]	NA	NA	NA	ENSMUSG00000099329
ENSMUSG00000104880	0.476112	-3.36382	3.25428	-1.03366	0.301295	NA	ENSMUSG00000104880	NA	AL645522.1	11	5038204	5038307	1	miRNA		NA	NA	NA	ENSMUSG00000104880
ENSMUSG00000006948	0.764292	-3.3568	1.47465	-2.27635	0.0228253	NA	ENSMUSG00000006948	56640	Klk4	7	43881160	43885804	1	protein_coding	kallikrein related-peptidase 4 (prostase, enamel matrix, prostate) [Source:MGI Symbol;Acc:MGI:1861379]	serine protease(PC00203)	NA	NA	ENSMUSG00000006948
ENSMUSG00000092356	0.622372	-3.3212	5.38477	-0.616777	0.537382	NA	ENSMUSG00000092356	NA	Gm20532	2	26586639	26635634	1	protein_coding	predicted gene 20532 [Source:MGI Symbol;Acc:MGI:5141997]	NA	NA	NA	ENSMUSG00000092356
ENSMUSG00000075391	24.4467	-3.29433	1.82794	-1.80221	0.0715129	1	ENSMUSG00000075391	NA	Gm13443	2	35340409	35340963	1	processed_pseudogene	predicted gene 13443 [Source:MGI Symbol;Acc:MGI:3649615]	NA	NA	NA	ENSMUSG00000075391
ENSMUSG00000073485	63.1455	-3.29038	1.11251	-2.95762	0.00310025	0.814196	ENSMUSG00000073485	NA	H3f3aos	1	180813776	180816859	1	antisense_RNA	H3 histone, family 3A, opposite strand [Source:MGI Symbol;Acc:MGI:3802006]	NA	NA	NA	ENSMUSG00000073485
ENSMUSG00000100490	0.539887	-3.26877	3.81256	-0.85737	0.391241	NA	ENSMUSG00000100490	NA	Gm28455	7	39489438	39498801	1	unprocessed_pseudogene	predicted gene 28455 [Source:MGI Symbol;Acc:MGI:5579161]	NA	NA	NA	ENSMUSG00000100490
ENSMUSG00000114951	11.9801	-3.26695	1.49358	-2.18734	0.028718	1	ENSMUSG00000114951	NA	AC238811.4	13	119962244	119963489	1	processed_pseudogene		NA	NA	NA	ENSMUSG00000114951
ENSMUSG00000115602	1.87567	-3.26122	2.80499	-1.16265	0.244972	1	ENSMUSG00000115602	NA	NA	NA	NA	NA	NA	NA	NA	NA	NA	NA	ENSMUSG00000115602
ENSMUSG00000113178	0.423568	-3.25304	5.4643	-0.595326	0.551625	NA	ENSMUSG00000113178	NA	AC122507.1	12	101221997	101222417	-1	processed_pseudogene		NA	NA	NA	ENSMUSG00000113178
ENSMUSG00000107440	0.635209	-3.22362	1.58109	-2.03887	0.0414632	NA	ENSMUSG00000107440	NA	Gm40377	6	73223050	73225064	1	TEC	predicted gene, 40377 [Source:MGI Symbol;Acc:MGI:5623262]	NA	NA	NA	ENSMUSG00000107440
ENSMUSG00000108573	1.18778	-3.22085	1.40889	-2.28609	0.0222489	1	ENSMUSG00000108573	NA	Gm44986	7	122096083	122098911	1	TEC	predicted gene 44986 [Source:MGI Symbol;Acc:MGI:5753562]	NA	NA	NA	ENSMUSG00000108573
ENSMUSG00000081797	1.30913	-3.21908	1.29335	-2.48895	0.0128121	1	ENSMUSG00000081797	NA	Gm8662	X	158248797	158249370	1	processed_pseudogene	predicted gene 8662 [Source:MGI Symbol;Acc:MGI:3645694]	NA	NA	NA	ENSMUSG00000081797
ENSMUSG00000081228	3.86165	-3.21558	3.59328	-0.894885	0.370848	1	ENSMUSG00000081228	NA	Gm16089	5	137615627	137615962	1	processed_pseudogene	predicted gene 16089 [Source:MGI Symbol;Acc:MGI:3801884]	NA	NA	NA	ENSMUSG00000081228
ENSMUSG00000037579	39.6509	-3.20078	1.17273	-2.72935	0.00634601	0.9766	ENSMUSG00000037579	16512	Kcnh3	15	99224976	99242817	1	protein_coding	potassium voltage-gated channel, subfamily H (eag-related), member 3 [Source:MGI Symbol;Acc:MGI:1341723]	NA	NA	NA	ENSMUSG00000037579
ENSMUSG00000020651	0.453176	-3.19984	3.75842	-0.851378	0.39456	NA	ENSMUSG00000020651	23985	Slc26a4	12	31519827	31559969	-1	protein_coding	solute carrier family 26, member 4 [Source:MGI Symbol;Acc:MGI:1346029]	NA	NA	NA	ENSMUSG00000020651
ENSMUSG00000025194	1.45339	-3.19953	1.71299	-1.8678	0.0617898	1	ENSMUSG00000025194	12780	Abcc2	19	43782192	43840740	1	protein_coding	ATP-binding cassette, sub-family C (CFTR/MRP), member 2 [Source:MGI Symbol;Acc:MGI:1352447]	ATP-binding cassette (ABC) transporter(PC00003)	NA	NA	ENSMUSG00000025194
ENSMUSG00000072675	3.20107	-3.18969	1.18885	-2.68302	0.00729612	1	ENSMUSG00000072675	100039227	Duxbl2	14	26118349	26129763	1	protein_coding	double homeobox B-like 2 [Source:MGI Symbol;Acc:MGI:3710620]	NA	NA	NA	ENSMUSG00000072675
ENSMUSG00000098690	0.652374	-3.18553	1.92318	-1.65639	0.0976431	NA	ENSMUSG00000098690	NA	Gm27316	5	139312424	139312700	1	misc_RNA	predicted gene, 27316 [Source:MGI Symbol;Acc:MGI:5530698]	NA	NA	NA	ENSMUSG00000098690
ENSMUSG00000045545	1.53688	-3.18479	5.45749	-0.583563	NA	NA	ENSMUSG00000045545	16664	Krt14	11	100203162	100207548	-1	protein_coding	keratin 14 [Source:MGI Symbol;Acc:MGI:96688]	NA	NA	NA	ENSMUSG00000045545
ENSMUSG00000095912	0.319316	-3.17286	5.46536	-0.58054	0.561551	NA	ENSMUSG00000095912	NA	Gm3317	14	5164535	5169233	1	protein_coding	predicted gene 3317 [Source:MGI Symbol;Acc:MGI:3781495]	NA	NA	NA	ENSMUSG00000095912
ENSMUSG00000093392	2.56424	-3.11252	2.12898	-1.46198	0.143747	1	ENSMUSG00000093392	NA	Gm6061	3	122256728	122257219	1	transcribed_processed_pseudogene	predicted gene 6061 [Source:MGI Symbol;Acc:MGI:3648621]	NA	NA	NA	ENSMUSG00000093392
ENSMUSG00000067344	7.87939	-3.10712	1.36307	-2.27951	0.0226369	1	ENSMUSG00000067344	NA	Rps25-ps1	6	145266400	145266777	1	processed_pseudogene	ribosomal protein S25, pseudogene 1 [Source:MGI Symbol;Acc:MGI:3642902]	NA	NA	NA	ENSMUSG00000067344
ENSMUSG00000081153	0.530295	-3.10327	1.7328	-1.7909	0.0733096	NA	ENSMUSG00000081153	NA	Gm11401	11	6242378	6242721	1	processed_pseudogene	predicted gene 11401 [Source:MGI Symbol;Acc:MGI:3649407]	NA	NA	NA	ENSMUSG00000081153
ENSMUSG00000082820	4.15763	-3.10032	3.79578	-0.81678	0.414054	1	ENSMUSG00000082820	NA	Gm13803	2	97949191	97949679	-1	processed_pseudogene	predicted gene 13803 [Source:MGI Symbol;Acc:MGI:3651056]	NA	NA	NA	ENSMUSG00000082820
ENSMUSG00000027376	0.568981	-3.09871	3.28682	-0.94277	0.345799	NA	ENSMUSG00000027376	192212	Prom2	2	127526473	127541467	-1	protein_coding	prominin 2 [Source:MGI Symbol;Acc:MGI:2138997]	membrane traffic protein(PC00150)	NA	NA	ENSMUSG00000027376
ENSMUSG00000039058	3.85991	-3.09679	1.37318	-2.25519	0.0241212	1	ENSMUSG00000039058	229949	Ak5	3	152462815	152668360	-1	protein_coding	adenylate kinase 5 [Source:MGI Symbol;Acc:MGI:2677491]	nucleotide kinase(PC00172)	NA	NA	ENSMUSG00000039058
ENSMUSG00000081456	1.38002	-3.08867	1.52061	-2.0312	0.0422343	1	ENSMUSG00000081456	NA	Gm7781	X	130524637	130525424	1	processed_pseudogene	predicted gene 7781 [Source:MGI Symbol;Acc:MGI:3643104]	NA	NA	NA	ENSMUSG00000081456
ENSMUSG00000031512	0.337393	-3.08728	3.26457	-0.945693	0.344305	NA	ENSMUSG00000031512	75528	Tex29	8	11840474	11855761	1	protein_coding	testis expressed 29 [Source:MGI Symbol;Acc:MGI:1922778]	NA	NA	NA	ENSMUSG00000031512
ENSMUSG00000091556	0.35884	-3.08717	4.02076	-0.767808	0.442601	NA	ENSMUSG00000091556	101055983	Gm14569	X	36423601	36491830	-1	protein_coding	predicted gene 14569 [Source:MGI Symbol;Acc:MGI:3705243]	NA	NA	NA	ENSMUSG00000091556
ENSMUSG00000065968	0.425212	-3.08343	1.94478	-1.58549	0.112854	NA	ENSMUSG00000065968	74482	Ifitm7	16	13981702	13986855	-1	protein_coding	interferon induced transmembrane protein 7 [Source:MGI Symbol;Acc:MGI:1921732]	NA	NA	NA	ENSMUSG00000065968
ENSMUSG00000062727	1.58539	-3.08219	1.63974	-1.87969	0.060151	1	ENSMUSG00000062727	319184	Hist1h2bk	13	22035870	22036345	1	protein_coding	histone cluster 1, H2bk [Source:MGI Symbol;Acc:MGI:2448399]	histone(PC00118)	NA	NA	ENSMUSG00000062727
ENSMUSG00000116429	0.459114	-3.079	2.49038	-1.23636	0.216325	NA	ENSMUSG00000116429	NA	NA	NA	NA	NA	NA	NA	NA	NA	NA	NA	ENSMUSG00000116429
ENSMUSG00000083382	1.6182	-3.07888	1.33051	-2.31406	0.0206643	1	ENSMUSG00000083382	NA	Gm6433	5	141267581	141268455	-1	processed_pseudogene	predicted gene 6433 [Source:MGI Symbol;Acc:MGI:3645394]	NA	NA	NA	ENSMUSG00000083382
ENSMUSG00000070473	0.238917	-3.07354	5.46677	-0.562223	0.573964	NA	ENSMUSG00000070473	12739	Cldn3	5	134986214	134987472	1	protein_coding	claudin 3 [Source:MGI Symbol;Acc:MGI:1329044]	tight junction(PC00214)	NA	NA	ENSMUSG00000070473
ENSMUSG00000096478	0.829798	-3.06859	1.75269	-1.75079	0.0799819	NA	ENSMUSG00000096478	NA	Trav9d-1	14	52792316	52792777	1	TR_V_gene	T cell receptor alpha variable 9D-1 [Source:MGI Symbol;Acc:MGI:3650631]	defense/immunity protein(PC00090)	NA	NA	ENSMUSG00000096478
ENSMUSG00000097527	2.51374	-3.06774	1.63123	-1.88063	0.0600228	1	ENSMUSG00000097527	NA	1700112J16Rik	7	67204082	67222536	-1	lincRNA	RIKEN cDNA 1700112J16 gene [Source:MGI Symbol;Acc:MGI:1923878]	NA	NA	NA	ENSMUSG00000097527
ENSMUSG00000085236	6.37692	-3.06675	1.29499	-2.36817	0.0178762	1	ENSMUSG00000085236	NA	2610206C17Rik	7	84689640	84779053	1	antisense_RNA	RIKEN cDNA 2610206C17 gene [Source:MGI Symbol;Acc:MGI:1919745]	NA	NA	NA	ENSMUSG00000085236
ENSMUSG00000081860	1.32669	-3.06501	1.33976	-2.28772	0.0221536	1	ENSMUSG00000081860	NA	Gm11533	11	97037007	97037483	1	processed_pseudogene	predicted gene 11533 [Source:MGI Symbol;Acc:MGI:3651874]	NA	NA	NA	ENSMUSG00000081860
ENSMUSG00000080242	1.04888	-3.05375	3.60815	-0.846349	0.397358	1	ENSMUSG00000080242	NA	Gm15487	6	37806086	37806550	1	processed_pseudogene	predicted gene 15487 [Source:MGI Symbol;Acc:MGI:3709610]	NA	NA	NA	ENSMUSG00000080242
ENSMUSG00000079069	0.507745	-3.03697	2.301	-1.31985	0.186886	NA	ENSMUSG00000079069	NA	8430423G03Rik	5	148950250	148951658	1	lincRNA	RIKEN cDNA 8430423G03 gene [Source:MGI Symbol;Acc:MGI:1918723]	NA	NA	NA	ENSMUSG00000079069
ENSMUSG00000008489	0.529379	-3.03616	3.33002	-0.911754	0.361898	NA	ENSMUSG00000008489	15569	Elavl2	4	91250763	91400785	-1	protein_coding	ELAV (embryonic lethal, abnormal vision, Drosophila)-like 2 (Hu antigen B) [Source:MGI Symbol;Acc:MGI:1100887]	NA	NA	NA	ENSMUSG00000008489
ENSMUSG00000086503	10832.9	-2.95813	1.36717	-2.16369	0.030488	1	ENSMUSG00000086503	NA	Xist	X	103460375	103483217	-1	lincRNA	inactive X specific transcripts [Source:MGI Symbol;Acc:MGI:98974]	NA	NA	NA	ENSMUSG00000086503
ENSMUSG00000092746	1.06634	-2.9301	3.04225	-0.963137	0.335479	1	ENSMUSG00000092746	NA	Rn7s6	6	69516339	69516629	1	misc_RNA	7S RNA 6 [Source:MGI Symbol;Acc:MGI:97956]	NA	NA	NA	ENSMUSG00000092746
ENSMUSG00000041911	0.715844	-2.92793	1.84185	-1.58967	0.111909	NA	ENSMUSG00000041911	13390	Dlx1	2	71528113	71533981	1	protein_coding	distal-less homeobox 1 [Source:MGI Symbol;Acc:MGI:94901]	DNA binding protein(PC00009)	homeodomain transcription factor(PC00119)	NA	ENSMUSG00000041911
ENSMUSG00000068877	1.7927	-2.92399	3.3164	-0.881675	NA	NA	ENSMUSG00000068877	20342	Selenbp2	3	94693556	94704413	1	protein_coding	selenium binding protein 2 [Source:MGI Symbol;Acc:MGI:104859]	NA	NA	NA	ENSMUSG00000068877
ENSMUSG00000074449	0.480053	-2.92075	4.72884	-0.617647	0.536808	NA	ENSMUSG00000074449	100040599	Gm15319	8	20337664	20363210	-1	protein_coding	predicted gene 15319 [Source:MGI Symbol;Acc:MGI:3796981]	NA	NA	NA	ENSMUSG00000074449
ENSMUSG00000084098	0.48927	-2.91764	2.2877	-1.27536	0.202182	NA	ENSMUSG00000084098	NA	Gm13422	2	23235236	23235739	1	processed_pseudogene	predicted gene 13422 [Source:MGI Symbol;Acc:MGI:3650167]	NA	NA	NA	ENSMUSG00000084098
ENSMUSG00000115785	0.844833	-2.91208	2.63659	-1.10449	0.269382	NA	ENSMUSG00000115785	NA	NA	NA	NA	NA	NA	NA	NA	NA	NA	NA	ENSMUSG00000115785
ENSMUSG00000115716	0.433535	-2.90837	1.76941	-1.64369	0.10024	NA	ENSMUSG00000115716	NA	NA	NA	NA	NA	NA	NA	NA	NA	NA	NA	ENSMUSG00000115716
ENSMUSG00000110696	0.311589	-2.90784	3.32916	-0.873448	0.382419	NA	ENSMUSG00000110696	NA	Gm45706	8	72765481	72767616	-1	TEC	predicted gene 45706 [Source:MGI Symbol;Acc:MGI:5804821]	NA	NA	NA	ENSMUSG00000110696
ENSMUSG00000048004	0.212843	-2.90675	5.46936	-0.531461	0.595099	NA	ENSMUSG00000048004	217951	Tmem196	12	119945822	120021246	1	protein_coding	transmembrane protein 196 [Source:MGI Symbol;Acc:MGI:2685374]	NA	NA	NA	ENSMUSG00000048004
ENSMUSG00000112117	0.242475	-2.90613	5.46937	-0.531346	0.595179	NA	ENSMUSG00000112117	NA	RMST_1	10	92071037	92165170	-1	lincRNA	Rhabdomyosarcoma 2 associated transcript conserved region 1 [Source:RFAM;Acc:RF01962]	NA	NA	NA	ENSMUSG00000112117
ENSMUSG00000043681	0.469263	-2.90609	5.46937	-0.531338	0.595184	NA	ENSMUSG00000043681	69134	Fam25c	14	34351881	34355433	-1	protein_coding	family with sequence similarity 25, member C [Source:MGI Symbol;Acc:MGI:1916384]	NA	NA	NA	ENSMUSG00000043681
ENSMUSG00000108332	0.923539	-2.90602	5.46937	-0.531325	0.595193	1	ENSMUSG00000108332	NA	D530033B14Rik	7	38182563	38196457	-1	antisense_RNA	RIKEN cDNA D530033B14 gene [Source:MGI Symbol;Acc:MGI:1925824]	NA	NA	NA	ENSMUSG00000108332
ENSMUSG00000020566	2.54863	-2.90189	1.66495	-1.74293	0.0813453	1	ENSMUSG00000020566	68775	Atp6v1c2	12	17284721	17329359	-1	protein_coding	ATPase, H+ transporting, lysosomal V1 subunit C2 [Source:MGI Symbol;Acc:MGI:1916025]	ATP synthase(PC00002)	hydrolase(PC00121)	NA	ENSMUSG00000020566
ENSMUSG00000072476	0.54715	-2.90104	2.60998	-1.11152	0.266345	NA	ENSMUSG00000072476	NA	Gm9008	6	76495432	76497784	-1	protein_coding	predicted pseudogene 9008 [Source:MGI Symbol;Acc:MGI:3644000]	NA	NA	NA	ENSMUSG00000072476
ENSMUSG00000050243	0.27776	-2.8919	5.46961	-0.528721	0.596999	NA	ENSMUSG00000050243	NA	Gm5446	13	19995021	19995804	-1	processed_pseudogene	predicted gene 5446 [Source:MGI Symbol;Acc:MGI:3644854]	NA	NA	NA	ENSMUSG00000050243
ENSMUSG00000095859	0.300814	-2.89181	3.31307	-0.87285	0.382745	NA	ENSMUSG00000095859	NA	Ighv1-43	12	114945950	114946383	-1	IG_V_gene	immunoglobulin heavy variable V1-43 [Source:MGI Symbol;Acc:MGI:3704124]	NA	NA	NA	ENSMUSG00000095859
ENSMUSG00000098566	1.63571	-2.8887	1.29213	-2.23561	0.0253776	1	ENSMUSG00000098566	NA	Gm27761	2	45111171	45111301	1	misc_RNA	predicted gene, 27761 [Source:MGI Symbol;Acc:MGI:5531143]	NA	NA	NA	ENSMUSG00000098566
ENSMUSG00000067919	0.953642	-2.88391	2.56638	-1.12373	0.261128	1	ENSMUSG00000067919	100043034	Rex2	4	147021850	147060794	1	protein_coding	reduced expression 2 [Source:MGI Symbol;Acc:MGI:1328322]	NA	NA	NA	ENSMUSG00000067919
ENSMUSG00000094456	0.899133	-2.88324	5.33645	-0.540291	0.588996	NA	ENSMUSG00000094456	NA	Gm22625	4	98557740	98557865	-1	miRNA	predicted gene, 22625 [Source:MGI Symbol;Acc:MGI:5452402]	NA	NA	NA	ENSMUSG00000094456
ENSMUSG00000107560	0.664668	-2.88173	1.60082	-1.80017	0.0718345	NA	ENSMUSG00000107560	NA	Gm44199	6	113610318	113612445	-1	antisense_RNA	predicted gene, 44199 [Source:MGI Symbol;Acc:MGI:5690591]	NA	NA	NA	ENSMUSG00000107560
ENSMUSG00000074196	0.328742	-2.88039	2.84898	-1.01102	0.312006	NA	ENSMUSG00000074196	NA	Clca4c-ps	3	144861826	144896011	-1	transcribed_unprocessed_pseudogene	chloride channel accessory 4C, pseudogene [Source:MGI Symbol;Acc:MGI:3643218]	NA	NA	NA	ENSMUSG00000074196
ENSMUSG00000082026	2.85886	-2.85851	1.10941	-2.57659	0.00997793	1	ENSMUSG00000082026	NA	Gm5764	X	158833435	158834319	1	processed_pseudogene	predicted gene 5764 [Source:MGI Symbol;Acc:MGI:3645102]	NA	NA	NA	ENSMUSG00000082026
ENSMUSG00000038987	0.924585	-2.85192	3.71341	-0.768007	NA	NA	ENSMUSG00000038987	227736	Cfap157	2	32777381	32784428	-1	protein_coding	cilia and flagella associated protein 157 [Source:MGI Symbol;Acc:MGI:2447809]	NA	NA	NA	ENSMUSG00000038987
ENSMUSG00000102323	1.57446	-2.84839	1.1824	-2.40898	0.015997	1	ENSMUSG00000102323	NA	Gm37790	2	156846370	156849715	-1	TEC	predicted gene, 37790 [Source:MGI Symbol;Acc:MGI:5611018]	NA	NA	NA	ENSMUSG00000102323
ENSMUSG00000056656	1.48197	-2.80681	1.82155	-1.54089	0.123343	1	ENSMUSG00000056656	239552	Apol8	15	77747799	77755229	-1	protein_coding	apolipoprotein L 8 [Source:MGI Symbol;Acc:MGI:2444921]	apolipoprotein(PC00052)	transporter(PC00227)	NA	ENSMUSG00000056656
ENSMUSG00000034825	3.91955	-2.8014	1.45632	-1.92361	NA	NA	ENSMUSG00000034825	78593	Nrip3	7	109758055	109782025	-1	protein_coding	nuclear receptor interacting protein 3 [Source:MGI Symbol;Acc:MGI:1925843]	aspartic protease(PC00053)	NA	NA	ENSMUSG00000034825
ENSMUSG00000115023	0.872946	-2.78687	1.88156	-1.48115	0.138567	NA	ENSMUSG00000115023	NA	NA	NA	NA	NA	NA	NA	NA	NA	NA	NA	ENSMUSG00000115023
ENSMUSG00000116215	0.405352	-2.78506	3.81713	-0.729622	0.465621	NA	ENSMUSG00000116215	NA	NA	NA	NA	NA	NA	NA	NA	NA	NA	NA	ENSMUSG00000116215
ENSMUSG00000052316	1.17361	-2.78283	1.64238	-1.69439	0.0901918	1	ENSMUSG00000052316	74488	Lrrc15	16	30269302	30283256	-1	protein_coding	leucine rich repeat containing 15 [Source:MGI Symbol;Acc:MGI:1921738]	extracellular matrix protein(PC00102)	receptor(PC00197)	NA	ENSMUSG00000052316
ENSMUSG00000039079	7.91113	-2.77952	1.1444	-2.42879	0.0151493	1	ENSMUSG00000039079	170732	Trhr2	8	122356967	122360746	-1	protein_coding	thyrotropin releasing hormone receptor 2 [Source:MGI Symbol;Acc:MGI:2177284]	NA	NA	NA	ENSMUSG00000039079
ENSMUSG00000101810	0.791748	-2.76317	1.51812	-1.82012	0.0687402	NA	ENSMUSG00000101810	NA	1700066C05Rik	16	79999376	80000546	1	lincRNA	RIKEN cDNA 1700066C05 gene [Source:MGI Symbol;Acc:MGI:1925904]	NA	NA	NA	ENSMUSG00000101810
ENSMUSG00000114534	0.499318	-2.74553	2.46136	-1.11545	0.264657	NA	ENSMUSG00000114534	NA	CT009733.1	13	107524061	107565331	-1	processed_transcript		NA	NA	NA	ENSMUSG00000114534
ENSMUSG00000096403	2.40247	-2.73699	2.16633	-1.26342	0.206437	1	ENSMUSG00000096403	NA	Gm9825	6	7982541	7983383	-1	processed_pseudogene	predicted gene 9825 [Source:MGI Symbol;Acc:MGI:3708729]	NA	NA	NA	ENSMUSG00000096403
ENSMUSG00000109009	0.381457	-2.73163	2.18417	-1.25065	0.211062	NA	ENSMUSG00000109009	NA	Gm44929	7	144764763	144770571	1	lincRNA	predicted gene 44929 [Source:MGI Symbol;Acc:MGI:5753505]	NA	NA	NA	ENSMUSG00000109009
ENSMUSG00000042367	0.475052	-2.72329	2.29495	-1.18664	0.235369	NA	ENSMUSG00000042367	14620	Gjb3	4	127325235	127330844	-1	protein_coding	gap junction protein, beta 3 [Source:MGI Symbol;Acc:MGI:95721]	gap junction(PC00105)	NA	NA	ENSMUSG00000042367
ENSMUSG00000104111	0.250032	-2.71773	4.94593	-0.549488	0.582671	NA	ENSMUSG00000104111	NA	Gm37294	1	160041701	160044331	-1	lincRNA	predicted gene, 37294 [Source:MGI Symbol;Acc:MGI:5610522]	NA	NA	NA	ENSMUSG00000104111
ENSMUSG00000097176	1.33768	-2.71693	1.33405	-2.03661	0.0416889	1	ENSMUSG00000097176	NA	Gm26830	11	95669952	95672719	1	lincRNA	predicted gene, 26830 [Source:MGI Symbol;Acc:MGI:5477324]	NA	NA	NA	ENSMUSG00000097176
ENSMUSG00000031853	0.834961	-2.71575	1.44965	-1.87339	0.0610145	NA	ENSMUSG00000031853	234878	Map3k21	8	125910450	125947440	1	protein_coding	mitogen-activated protein kinase kinase kinase 21 [Source:MGI Symbol;Acc:MGI:2385307]	NA	NA	NA	ENSMUSG00000031853
ENSMUSG00000023945	0.186156	-2.71349	5.47276	-0.495817	0.620023	NA	ENSMUSG00000023945	63993	Slc5a7	17	54273594	54299034	-1	protein_coding	solute carrier family 5 (choline transporter), member 7 [Source:MGI Symbol;Acc:MGI:1927126]	NA	NA	NA	ENSMUSG00000023945
ENSMUSG00000070419	0.186156	-2.71349	5.47276	-0.495817	0.620023	NA	ENSMUSG00000070419	622127	Cyp3a57	5	145345279	145390926	1	protein_coding	cytochrome P450, family 3, subfamily a, polypeptide 57 [Source:MGI Symbol;Acc:MGI:3646373]	oxygenase(PC00177)	NA	NA	ENSMUSG00000070419
ENSMUSG00000102452	0.343348	-2.71345	2.16593	-1.25278	0.210284	NA	ENSMUSG00000102452	NA	Gm38344	9	101186556	101187908	-1	TEC	predicted gene, 38344 [Source:MGI Symbol;Acc:MGI:5611572]	NA	NA	NA	ENSMUSG00000102452
ENSMUSG00000106028	0.893015	-2.71282	1.37573	-1.97191	0.0486201	NA	ENSMUSG00000106028	NA	Gm8493	5	109551892	109554156	-1	unprocessed_pseudogene	predicted gene 8493 [Source:MGI Symbol;Acc:MGI:3779800]	NA	NA	NA	ENSMUSG00000106028
ENSMUSG00000047143	0.947987	-2.71254	1.35217	-2.00607	0.0448491	1	ENSMUSG00000047143	242620	Dmrta2	4	109978053	109983687	1	protein_coding	doublesex and mab-3 related transcription factor like family A2 [Source:MGI Symbol;Acc:MGI:2653629]	NA	NA	NA	ENSMUSG00000047143
ENSMUSG00000016386	0.920962	-2.71218	2.19371	-1.23635	0.21633	1	ENSMUSG00000016386	77015	Mpped2	2	106693269	106868356	1	protein_coding	metallophosphoesterase domain containing 2 [Source:MGI Symbol;Acc:MGI:1924265]	hydrolase(PC00121)	NA	NA	ENSMUSG00000016386
ENSMUSG00000109438	0.364218	-2.71104	2.45459	-1.10448	0.269387	NA	ENSMUSG00000109438	NA	Gm45073	8	8642766	8647012	-1	TEC	predicted gene 45073 [Source:MGI Symbol;Acc:MGI:5753649]	NA	NA	NA	ENSMUSG00000109438
ENSMUSG00000043003	0.185729	-2.71026	5.47282	-0.495222	0.620443	NA	ENSMUSG00000043003	242505	Rasef	4	73714579	73790994	-1	protein_coding	RAS and EF hand domain containing [Source:MGI Symbol;Acc:MGI:2448565]	NA	NA	NA	ENSMUSG00000043003
ENSMUSG00000109059	1.86013	-2.71021	1.40833	-1.92441	0.0543036	1	ENSMUSG00000109059	NA	Gm9354	7	51458060	51458527	1	processed_pseudogene	predicted gene 9354 [Source:MGI Symbol;Acc:MGI:3647598]	NA	NA	NA	ENSMUSG00000109059
ENSMUSG00000111505	0.338266	-2.70812	2.47102	-1.09595	0.2731	NA	ENSMUSG00000111505	NA	AC156163.1	9	27021553	27024921	-1	TEC		NA	NA	NA	ENSMUSG00000111505
ENSMUSG00000097888	0.406107	-2.70773	1.95143	-1.38756	0.165271	NA	ENSMUSG00000097888	NA	Gm26682	18	5162880	5165731	-1	lincRNA	predicted gene, 26682 [Source:MGI Symbol;Acc:MGI:5477176]	NA	NA	NA	ENSMUSG00000097888
ENSMUSG00000091083	1.219	-2.70444	2.64939	-1.02078	0.30736	1	ENSMUSG00000091083	NA	Gm4535	7	141406637	141407194	1	processed_pseudogene	predicted gene 4535 [Source:MGI Symbol;Acc:MGI:3782719]	NA	NA	NA	ENSMUSG00000091083
ENSMUSG00000112594	0.344835	-2.70313	5.47296	-0.493907	0.621372	NA	ENSMUSG00000112594	NA	AC159114.1	10	50813725	50813990	1	processed_pseudogene		NA	NA	NA	ENSMUSG00000112594
ENSMUSG00000051340	0.338641	-2.69818	2.46662	-1.09388	0.274009	NA	ENSMUSG00000051340	258247	Olfr645	7	104081789	104085465	-1	protein_coding	olfactory receptor 645 [Source:MGI Symbol;Acc:MGI:3030479]	NA	NA	NA	ENSMUSG00000051340
ENSMUSG00000099980	8.37653	-2.69676	1.3183	-2.04563	0.0407924	1	ENSMUSG00000099980	NA	Gm5619	9	85781868	85782627	-1	processed_pseudogene	predicted gene 5619 [Source:MGI Symbol;Acc:MGI:3643807]	NA	NA	NA	ENSMUSG00000099980
ENSMUSG00000093010	0.657326	-2.69387	1.82708	-1.47441	0.140371	NA	ENSMUSG00000093010	NA	Gm22460	13	3957119	3957242	-1	miRNA	predicted gene, 22460 [Source:MGI Symbol;Acc:MGI:5452237]	NA	NA	NA	ENSMUSG00000093010
ENSMUSG00000079391	2.77458	-2.68711	2.75819	-0.97423	0.329943	1	ENSMUSG00000079391	NA	Gm2974	14	4182576	4204895	1	protein_coding	predicted gene 2974 [Source:MGI Symbol;Acc:MGI:3781152]	NA	NA	NA	ENSMUSG00000079391
ENSMUSG00000112879	0.538203	-2.67779	2.08904	-1.28183	0.199903	NA	ENSMUSG00000112879	NA	AC158802.2	10	123178324	123178684	-1	processed_pseudogene		NA	NA	NA	ENSMUSG00000112879
ENSMUSG00000037143	4.08323	-2.67571	1.19266	-2.24349	NA	NA	ENSMUSG00000037143	78774	Cfap61	2	145934784	146215039	1	protein_coding	cilia and flagella associated protein 61 [Source:MGI Symbol;Acc:MGI:1926024]	NA	NA	NA	ENSMUSG00000037143
ENSMUSG00000098943	1.85068	-2.67079	1.96839	-1.35684	0.174832	1	ENSMUSG00000098943	NA	Rnu3b1	11	87443237	87443452	1	snoRNA	U3B small nuclear RNA 1 [Source:MGI Symbol;Acc:MGI:97985]	NA	NA	NA	ENSMUSG00000098943
ENSMUSG00000074359	2.93539	-2.66987	1.0952	-2.43778	0.0147776	1	ENSMUSG00000074359	56868	Psg23	7	18606343	18616501	-1	protein_coding	pregnancy-specific glycoprotein 23 [Source:MGI Symbol;Acc:MGI:1891355]	cell adhesion molecule(PC00069)	immunoglobulin receptor superfamily(PC00124)	protein kinase(PC00193)	ENSMUSG00000074359
ENSMUSG00000097610	0.661372	-2.66916	4.71851	-0.565678	0.571612	NA	ENSMUSG00000097610	NA	A930012L18Rik	18	44661665	44676271	1	antisense_RNA	RIKEN cDNA A930012L18 gene [Source:MGI Symbol;Acc:MGI:2442887]	NA	NA	NA	ENSMUSG00000097610
ENSMUSG00000115458	0.786489	-2.65647	1.59364	-1.66692	0.0955306	NA	ENSMUSG00000115458	NA	NA	NA	NA	NA	NA	NA	NA	NA	NA	NA	ENSMUSG00000115458
ENSMUSG00000030877	0.7776	-2.64795	1.43294	-1.84791	0.064615	NA	ENSMUSG00000030877	74466	Mfsd13b	7	120982509	121014787	1	protein_coding	major facilitator superfamily domain containing 13B [Source:MGI Symbol;Acc:MGI:1921716]	NA	NA	NA	ENSMUSG00000030877
ENSMUSG00000078796	0.790705	-2.64033	1.4207	-1.85848	0.0631013	NA	ENSMUSG00000078796	666528	Zfp541	7	16061814	16096334	1	protein_coding	zinc finger protein 541 [Source:MGI Symbol;Acc:MGI:3647699]	NA	NA	NA	ENSMUSG00000078796
ENSMUSG00000032068	1.49268	-2.63615	1.58223	-1.6661	0.0956932	1	ENSMUSG00000032068	76509	Plet1	9	50494525	50505482	1	protein_coding	placenta expressed transcript 1 [Source:MGI Symbol;Acc:MGI:1923759]	NA	NA	NA	ENSMUSG00000032068
ENSMUSG00000031553	30.0949	-2.62152	1.01525	-2.58215	0.00981878	1	ENSMUSG00000031553	11497	Adam3	8	24677225	24725852	-1	protein_coding	a disintegrin and metallopeptidase domain 3 (cyritestin) [Source:MGI Symbol;Acc:MGI:102518]	metalloprotease(PC00153)	NA	NA	ENSMUSG00000031553
ENSMUSG00000096805	21.8126	-2.58938	0.986181	-2.62567	NA	NA	ENSMUSG00000096805	NA	Ighv9-1	12	114093928	114094358	-1	IG_V_gene	immunoglobulin heavy variable 9-1 [Source:MGI Symbol;Acc:MGI:4439911]	NA	NA	NA	ENSMUSG00000096805
ENSMUSG00000093909	3.1642	-2.56681	1.32027	-1.94416	0.051876	1	ENSMUSG00000093909	NA	Gm3883	4	42456965	42461867	1	unprocessed_pseudogene	predicted gene 3883 [Source:MGI Symbol;Acc:MGI:3823028]	NA	NA	NA	ENSMUSG00000093909
ENSMUSG00000105207	8.44509	-2.56375	1.84092	-1.39265	0.163726	1	ENSMUSG00000105207	NA	Gm42927	3	120735721	120739561	-1	processed_pseudogene	predicted gene 42927 [Source:MGI Symbol;Acc:MGI:5663064]	NA	NA	NA	ENSMUSG00000105207
ENSMUSG00000047002	0.766009	-2.56052	1.41924	-1.80415	0.071208	NA	ENSMUSG00000047002	56184	Msgn1	12	11208360	11208972	-1	protein_coding	mesogenin 1 [Source:MGI Symbol;Acc:MGI:1860483]	NA	NA	NA	ENSMUSG00000047002
ENSMUSG00000032796	5.58528	-2.53941	0.811338	-3.1299	0.00174865	0.662105	ENSMUSG00000032796	16772	Lama1	17	67697265	67822645	1	protein_coding	laminin, alpha 1 [Source:MGI Symbol;Acc:MGI:99892]	NA	NA	NA	ENSMUSG00000032796
ENSMUSG00000032443	1.20239	-2.53773	1.98085	-1.28113	0.200147	1	ENSMUSG00000032443	NA	Zcwpw2	9	117876000	118040259	-1	transcribed_unprocessed_pseudogene	zinc finger, CW type with PWWP domain 2 [Source:MGI Symbol;Acc:MGI:1921888]	NA	NA	NA	ENSMUSG00000032443
ENSMUSG00000026830	0.290543	-2.5314	4.09532	-0.618121	0.536495	NA	ENSMUSG00000026830	77767	Ermn	2	58045113	58052864	-1	protein_coding	ermin, ERM-like protein [Source:MGI Symbol;Acc:MGI:1925017]	NA	NA	NA	ENSMUSG00000026830
ENSMUSG00000001827	0.339559	-2.52734	4.07008	-0.620957	0.534628	NA	ENSMUSG00000001827	14275	Folr1	7	101858331	101870788	-1	protein_coding	folate receptor 1 (adult) [Source:MGI Symbol;Acc:MGI:95568]	NA	NA	NA	ENSMUSG00000001827
ENSMUSG00000099142	1.86045	-2.52594	1.42589	-1.77148	0.0764804	1	ENSMUSG00000099142	NA	Mir8108	8	25159125	25159233	-1	miRNA	microRNA 8108 [Source:MGI Symbol;Acc:MGI:5530866]	NA	NA	NA	ENSMUSG00000099142
ENSMUSG00000060275	10.8674	-2.52261	0.817624	-3.0853	NA	NA	ENSMUSG00000060275	100042150	Nrg2	18	36017707	36197380	-1	protein_coding	neuregulin 2 [Source:MGI Symbol;Acc:MGI:1098246]	NA	NA	NA	ENSMUSG00000060275
ENSMUSG00000105650	0.162887	-2.51997	5.47665	-0.46013	0.645423	NA	ENSMUSG00000105650	NA	Gm42889	6	67532489	67556204	1	lincRNA	predicted gene 42889 [Source:MGI Symbol;Acc:MGI:5663026]	NA	NA	NA	ENSMUSG00000105650
ENSMUSG00000064330	4.46573	-2.51965	1.8266	-1.37942	0.167766	1	ENSMUSG00000064330	78600	Pde6h	6	136923832	136968865	1	protein_coding	phosphodiesterase 6H, cGMP-specific, cone, gamma [Source:MGI Symbol;Acc:MGI:1925850]	esterase(PC00097)	phosphodiesterase(PC00185)	NA	ENSMUSG00000064330
ENSMUSG00000047938	0.423177	-2.51644	2.56772	-0.98003	0.327071	NA	ENSMUSG00000047938	NA	4930483J18Rik	15	81190774	81192763	1	processed_transcript	RIKEN cDNA 4930483J18 gene [Source:MGI Symbol;Acc:MGI:1914888]	NA	NA	NA	ENSMUSG00000047938
ENSMUSG00000064604	1.82026	-2.51527	1.74864	-1.43841	0.150316	1	ENSMUSG00000064604	NA	Snora44	4	132309941	132310069	1	snoRNA	small nucleolar RNA, H/ACA box 44 [Source:MGI Symbol;Acc:MGI:3819506]	NA	NA	NA	ENSMUSG00000064604
ENSMUSG00000115074	2.8158	-2.51525	2.79334	-0.900444	0.367884	1	ENSMUSG00000115074	NA	NA	NA	NA	NA	NA	NA	NA	NA	NA	NA	ENSMUSG00000115074
ENSMUSG00000116924	0.567314	-2.51408	1.8287	-1.3748	0.169195	NA	ENSMUSG00000116924	NA	NA	NA	NA	NA	NA	NA	NA	NA	NA	NA	ENSMUSG00000116924
ENSMUSG00000104274	0.375911	-2.51359	2.52559	-0.995248	0.319616	NA	ENSMUSG00000104274	NA	Gm8823	3	7192778	7193210	-1	processed_pseudogene	predicted gene 8823 [Source:MGI Symbol;Acc:MGI:3647094]	NA	NA	NA	ENSMUSG00000104274
ENSMUSG00000105963	0.285792	-2.50683	2.90318	-0.863476	0.387876	NA	ENSMUSG00000105963	NA	Gm43647	14	53918327	53961515	-1	antisense_RNA	predicted gene 43647 [Source:MGI Symbol;Acc:MGI:5663784]	NA	NA	NA	ENSMUSG00000105963
ENSMUSG00000082087	1.207	-2.50522	2.47117	-1.01378	0.310689	1	ENSMUSG00000082087	NA	Gm12138	11	40672906	40673856	-1	processed_pseudogene	predicted gene 12138 [Source:MGI Symbol;Acc:MGI:3651749]	NA	NA	NA	ENSMUSG00000082087
ENSMUSG00000112527	0.224973	-2.50349	5.47701	-0.45709	0.647606	NA	ENSMUSG00000112527	NA	AC124413.2	10	121506623	121526101	1	lincRNA		NA	NA	NA	ENSMUSG00000112527
ENSMUSG00000077148	0.377303	-2.50279	2.91975	-0.857194	0.391338	NA	ENSMUSG00000077148	NA	Gm22935	3	89097910	89098013	-1	snRNA	predicted gene, 22935 [Source:MGI Symbol;Acc:MGI:5452712]	NA	NA	NA	ENSMUSG00000077148
ENSMUSG00000076436	0.494262	-2.50271	1.92229	-1.30194	0.192937	NA	ENSMUSG00000076436	64059	Oxct2a	4	123321875	123323634	-1	protein_coding	3-oxoacid CoA transferase 2A [Source:MGI Symbol;Acc:MGI:1891061]	transferase(PC00220)	NA	NA	ENSMUSG00000076436
ENSMUSG00000087265	0.190329	-2.50018	5.47708	-0.45648	0.648045	NA	ENSMUSG00000087265	NA	Gm12349	11	100291671	100293711	1	lincRNA	predicted gene 12349 [Source:MGI Symbol;Acc:MGI:3650494]	NA	NA	NA	ENSMUSG00000087265
ENSMUSG00000034435	0.450761	-2.49836	1.91315	-1.30589	0.19159	NA	ENSMUSG00000034435	238257	Tmem30b	12	73543402	73546392	-1	protein_coding	transmembrane protein 30B [Source:MGI Symbol;Acc:MGI:2442082]	NA	NA	NA	ENSMUSG00000034435
ENSMUSG00000056468	0.476143	-2.4975	2.09182	-1.19394	0.232501	NA	ENSMUSG00000056468	NA	5730596B20Rik	6	52177498	52180851	1	protein_coding	RIKEN cDNA 5730596B20 gene [Source:MGI Symbol;Acc:MGI:1924830]	NA	NA	NA	ENSMUSG00000056468
ENSMUSG00000037424	0.192325	-2.49652	5.47716	-0.455806	0.648529	NA	ENSMUSG00000037424	503558	Taar9	10	24108488	24109534	-1	protein_coding	trace amine-associated receptor 9 [Source:MGI Symbol;Acc:MGI:3527454]	NA	NA	NA	ENSMUSG00000037424
ENSMUSG00000107747	0.92734	-2.49651	1.69999	-1.46855	0.141956	1	ENSMUSG00000107747	NA	Gm5881	6	96033003	96033369	-1	processed_pseudogene	predicted gene 5881 [Source:MGI Symbol;Acc:MGI:3779532]	NA	NA	NA	ENSMUSG00000107747
ENSMUSG00000101587	0.46243	-2.4958	1.75049	-1.42577	0.153934	NA	ENSMUSG00000101587	NA	Gm29036	5	45768867	45769743	-1	transcribed_processed_pseudogene	predicted gene 29036 [Source:MGI Symbol;Acc:MGI:5579742]	NA	NA	NA	ENSMUSG00000101587
ENSMUSG00000109611	0.652816	-2.49559	1.47306	-1.69415	0.0902373	NA	ENSMUSG00000109611	NA	Gm45473	7	112652782	112653397	1	processed_pseudogene	predicted gene 45473 [Source:MGI Symbol;Acc:MGI:5791309]	NA	NA	NA	ENSMUSG00000109611
ENSMUSG00000074388	0.634854	-2.49468	1.54883	-1.61068	0.107248	NA	ENSMUSG00000074388	NA	Gm5544	3	97930173	97967018	1	lincRNA	predicted gene 5544 [Source:MGI Symbol;Acc:MGI:3648209]	NA	NA	NA	ENSMUSG00000074388
ENSMUSG00000067049	0.948136	-2.49404	1.9473	-1.28077	0.200276	1	ENSMUSG00000067049	381058	Unc93a	17	13108617	13131791	-1	protein_coding	unc-93 homolog A (C. elegans) [Source:MGI Symbol;Acc:MGI:1933250]	membrane-bound signaling molecule(PC00152)	NA	NA	ENSMUSG00000067049
ENSMUSG00000031230	0.406115	-2.49137	2.25516	-1.10474	0.269271	NA	ENSMUSG00000031230	80903	Fgf16	X	105764279	105774939	1	protein_coding	fibroblast growth factor 16 [Source:MGI Symbol;Acc:MGI:1931627]	growth factor(PC00112)	NA	NA	ENSMUSG00000031230
ENSMUSG00000104434	0.396006	-2.49128	1.99732	-1.24731	0.212283	NA	ENSMUSG00000104434	NA	Gm37421	3	10232180	10232311	1	processed_pseudogene	predicted gene, 37421 [Source:MGI Symbol;Acc:MGI:5610649]	NA	NA	NA	ENSMUSG00000104434
ENSMUSG00000109564	0.159562	-2.49109	5.47728	-0.454805	0.64925	NA	ENSMUSG00000109564	NA	Muc16	9	18495455	18674530	-1	protein_coding	mucin 16 [Source:MGI Symbol;Acc:MGI:1920982]	NA	NA	NA	ENSMUSG00000109564
ENSMUSG00000000706	0.295448	-2.49106	5.47728	-0.454798	0.649254	NA	ENSMUSG00000000706	12231	Btn1a1	13	23456992	23465901	-1	protein_coding	butyrophilin, subfamily 1, member A1 [Source:MGI Symbol;Acc:MGI:103118]	protease inhibitor(PC00191)	NA	NA	ENSMUSG00000000706
ENSMUSG00000109658	1.86793	-2.49081	1.67235	-1.48941	0.13638	1	ENSMUSG00000109658	NA	Gm45660	8	40683497	40683647	-1	processed_pseudogene	predicted gene 45660 [Source:MGI Symbol;Acc:MGI:5791496]	NA	NA	NA	ENSMUSG00000109658
ENSMUSG00000116993	0.85796	-2.49056	1.67323	-1.48847	0.136627	NA	ENSMUSG00000116993	NA	NA	NA	NA	NA	NA	NA	NA	NA	NA	NA	ENSMUSG00000116993
ENSMUSG00000096923	1.5142	-2.49051	1.25634	-1.98235	0.0474405	1	ENSMUSG00000096923	NA	A730071L15Rik	11	6200029	6201643	1	protein_coding	RIKEN cDNA A730071L15Rik gene [Source:MGI Symbol;Acc:MGI:3642498]	NA	NA	NA	ENSMUSG00000096923
ENSMUSG00000096712	1.53807	-2.4903	1.91303	-1.30175	0.193001	1	ENSMUSG00000096712	NA	Gm15454	1	134518081	134518563	1	processed_pseudogene	predicted gene 15454 [Source:MGI Symbol;Acc:MGI:3644262]	NA	NA	NA	ENSMUSG00000096712
ENSMUSG00000084729	0.709728	-2.48989	1.59763	-1.55849	0.119117	NA	ENSMUSG00000084729	NA	Gm24139	5	134204469	134204756	1	misc_RNA	predicted gene, 24139 [Source:MGI Symbol;Acc:MGI:5453916]	NA	NA	NA	ENSMUSG00000084729
ENSMUSG00000048482	0.514029	-2.48782	2.33818	-1.064	0.28733	NA	ENSMUSG00000048482	12064	Bdnf	2	109674700	109727007	1	protein_coding	brain derived neurotrophic factor [Source:MGI Symbol;Acc:MGI:88145]	neurotrophic factor(PC00163)	NA	NA	ENSMUSG00000048482
ENSMUSG00000108180	0.62053	-2.48712	1.48037	-1.68007	0.0929437	NA	ENSMUSG00000108180	NA	Gm44141	6	47635297	47636879	1	TEC	predicted gene, 44141 [Source:MGI Symbol;Acc:MGI:5690533]	NA	NA	NA	ENSMUSG00000108180
ENSMUSG00000099878	4.29942	-2.48519	1.24426	-1.99732	0.0457901	1	ENSMUSG00000099878	NA	Gm28178	1	52570014	52580291	-1	lincRNA	predicted gene 28178 [Source:MGI Symbol;Acc:MGI:5578884]	NA	NA	NA	ENSMUSG00000099878
ENSMUSG00000094541	0.54559	-2.48449	4.03379	-0.615919	0.537948	NA	ENSMUSG00000094541	NA	Gm24089	8	123601572	123601680	-1	rRNA	predicted gene, 24089 [Source:MGI Symbol;Acc:MGI:5453866]	NA	NA	NA	ENSMUSG00000094541
ENSMUSG00000105879	1.41682	-2.48389	1.56936	-1.58274	0.11348	1	ENSMUSG00000105879	NA	Gm6204	3	53692422	53692878	-1	processed_pseudogene	predicted gene 6204 [Source:MGI Symbol;Acc:MGI:3649038]	NA	NA	NA	ENSMUSG00000105879
ENSMUSG00000084674	0.605617	-2.47795	1.76816	-1.40143	0.161085	NA	ENSMUSG00000084674	NA	Gm26027	3	121337692	121337959	1	misc_RNA	predicted gene, 26027 [Source:MGI Symbol;Acc:MGI:5455804]	NA	NA	NA	ENSMUSG00000084674
ENSMUSG00000113255	0.626437	-2.47688	3.42499	-0.723177	0.469571	NA	ENSMUSG00000113255	NA	AC123954.1	13	49493318	49496589	1	protein_coding		NA	NA	NA	ENSMUSG00000113255
ENSMUSG00000117062	1.01473	-2.4766	1.53166	-1.61694	0.105892	1	ENSMUSG00000117062	NA	NA	NA	NA	NA	NA	NA	NA	NA	NA	NA	ENSMUSG00000117062
ENSMUSG00000110778	0.517834	-2.47306	1.76272	-1.40298	0.160624	NA	ENSMUSG00000110778	NA	CT025607.1	9	31782984	31783703	1	processed_pseudogene		NA	NA	NA	ENSMUSG00000110778
ENSMUSG00000115454	0.396252	-2.47271	2.51821	-0.981932	0.326133	NA	ENSMUSG00000115454	NA	NA	NA	NA	NA	NA	NA	NA	NA	NA	NA	ENSMUSG00000115454
ENSMUSG00000044434	3.35223	-2.46999	2.35158	-1.05035	0.293555	1	ENSMUSG00000044434	NA	Gm9791	3	34005017	34005463	-1	processed_pseudogene	predicted pseudogene 9791 [Source:MGI Symbol;Acc:MGI:3642317]	NA	NA	NA	ENSMUSG00000044434
ENSMUSG00000104642	0.518066	-2.46896	2.94691	-0.837813	0.402136	NA	ENSMUSG00000104642	NA	Gm9207	3	96454835	96455949	-1	processed_pseudogene	predicted gene 9207 [Source:MGI Symbol;Acc:MGI:3779840]	NA	NA	NA	ENSMUSG00000104642
ENSMUSG00000092574	0.530545	-2.46834	5.47778	-0.45061	0.652271	NA	ENSMUSG00000092574	NA	2810047C21Rik1	7	8086326	8093041	-1	transcribed_unprocessed_pseudogene	RIKEN cDNA 2810047C21 gene 1 [Source:MGI Symbol;Acc:MGI:1919966]	NA	NA	NA	ENSMUSG00000092574
ENSMUSG00000115752	0.255273	-2.46709	4.07971	-0.604721	0.545365	NA	ENSMUSG00000115752	NA	NA	NA	NA	NA	NA	NA	NA	NA	NA	NA	ENSMUSG00000115752
ENSMUSG00000067545	0.740331	-2.46552	1.57418	-1.56623	0.117295	NA	ENSMUSG00000067545	257938	Olfr1419	19	11868613	11875106	-1	protein_coding	olfactory receptor 1419 [Source:MGI Symbol;Acc:MGI:3031253]	NA	NA	NA	ENSMUSG00000067545
ENSMUSG00000081145	0.582559	-2.46541	1.59439	-1.5463	0.122031	NA	ENSMUSG00000081145	NA	Gm14585	X	53314533	53315166	1	processed_pseudogene	predicted gene 14585 [Source:MGI Symbol;Acc:MGI:3709649]	NA	NA	NA	ENSMUSG00000081145
ENSMUSG00000089617	0.60568	-2.45941	3.46696	-0.709383	0.478087	NA	ENSMUSG00000089617	NA	Scarna10	6	125186359	125186683	-1	snoRNA	small Cajal body-specific RNA 10 [Source:MGI Symbol;Acc:MGI:3819482]	NA	NA	NA	ENSMUSG00000089617
ENSMUSG00000082328	1.20664	-2.45301	1.64848	-1.48804	0.13674	1	ENSMUSG00000082328	NA	Gm13921	2	102174290	102174752	1	processed_pseudogene	predicted gene 13921 [Source:MGI Symbol;Acc:MGI:3651614]	NA	NA	NA	ENSMUSG00000082328
ENSMUSG00000089806	0.496223	-2.45239	1.94314	-1.26208	0.20692	NA	ENSMUSG00000089806	NA	Gm16570	12	81589435	81589870	-1	processed_pseudogene	predicted gene 16570 [Source:MGI Symbol;Acc:MGI:4414990]	NA	NA	NA	ENSMUSG00000089806
ENSMUSG00000084842	0.155034	-2.45075	5.47817	-0.447366	0.654611	NA	ENSMUSG00000084842	NA	Pabpc1l2b-ps	X	103013698	103014387	1	processed_pseudogene	poly(A) binding protein, cytoplasmic 1-like 2B, pseudogene [Source:MGI Symbol;Acc:MGI:3644774]	NA	NA	NA	ENSMUSG00000084842
ENSMUSG00000037386	0.960817	-2.439	2.65416	-0.918934	0.35813	1	ENSMUSG00000037386	116838	Rims2	15	39198332	39681940	1	protein_coding	regulating synaptic membrane exocytosis 2 [Source:MGI Symbol;Acc:MGI:2152972]	G-protein modulator(PC00022)	NA	NA	ENSMUSG00000037386
ENSMUSG00000044217	0.483609	-2.40768	3.26226	-0.738041	0.46049	NA	ENSMUSG00000044217	11830	Aqp5	15	99590849	99594829	1	protein_coding	aquaporin 5 [Source:MGI Symbol;Acc:MGI:106215]	transporter(PC00227)	NA	NA	ENSMUSG00000044217
ENSMUSG00000113850	2.38518	-2.3972	2.0678	-1.1593	0.246334	1	ENSMUSG00000113850	NA	AC156576.5	13	64611860	64619498	1	transcribed_processed_pseudogene		NA	NA	NA	ENSMUSG00000113850
ENSMUSG00000084497	0.930901	-2.39247	1.42493	-1.67901	0.093151	1	ENSMUSG00000084497	NA	Gm22107	15	77840657	77840756	-1	snRNA	predicted gene, 22107 [Source:MGI Symbol;Acc:MGI:5451884]	NA	NA	NA	ENSMUSG00000084497
ENSMUSG00000099519	0.800205	-2.38951	5.47958	-0.436076	0.662781	NA	ENSMUSG00000099519	NA	Gm29253	1	75171731	75185146	-1	processed_transcript	predicted gene 29253 [Source:MGI Symbol;Acc:MGI:5579959]	NA	NA	NA	ENSMUSG00000099519
ENSMUSG00000112489	1.73714	-2.38419	1.21749	-1.95829	0.0501965	1	ENSMUSG00000112489	NA	AC165249.1	12	79088705	79103939	-1	lincRNA		NA	NA	NA	ENSMUSG00000112489
ENSMUSG00000109055	2.27548	-2.37822	1.55383	-1.53055	0.125881	1	ENSMUSG00000109055	NA	Gm2676	8	4713207	4713812	1	processed_pseudogene	predicted gene 2676 [Source:MGI Symbol;Acc:MGI:3780845]	NA	NA	NA	ENSMUSG00000109055
ENSMUSG00000090894	0.426577	-2.37733	3.35647	-0.708282	0.47877	NA	ENSMUSG00000090894	258325	Olfr110	17	37492468	37500207	1	protein_coding	olfactory receptor 110 [Source:MGI Symbol;Acc:MGI:2177493]	NA	NA	NA	ENSMUSG00000090894
ENSMUSG00000117380	0.587518	-2.37608	1.6074	-1.47821	0.139351	NA	ENSMUSG00000117380	NA	NA	NA	NA	NA	NA	NA	NA	NA	NA	NA	ENSMUSG00000117380
ENSMUSG00000052525	0.79325	-2.37224	1.54049	-1.53992	0.12358	NA	ENSMUSG00000052525	70891	Spdya	17	71552061	71589533	1	protein_coding	speedy/RINGO cell cycle regulator family, member A [Source:MGI Symbol;Acc:MGI:1918141]	NA	NA	NA	ENSMUSG00000052525
ENSMUSG00000037196	0.827709	-2.36908	1.72916	-1.37008	0.170662	NA	ENSMUSG00000037196	69310	Pacrg	17	10403012	10840311	-1	protein_coding	PARK2 co-regulated [Source:MGI Symbol;Acc:MGI:1916560]	NA	NA	NA	ENSMUSG00000037196
ENSMUSG00000004961	0.950153	-2.3629	2.02719	-1.16561	0.243773	1	ENSMUSG00000004961	53420	Syt5	7	4539765	4547541	-1	protein_coding	synaptotagmin V [Source:MGI Symbol;Acc:MGI:1926368]	membrane trafficking regulatory protein(PC00151)	NA	NA	ENSMUSG00000004961
ENSMUSG00000036687	0.678475	-2.3622	2.26283	-1.04391	0.296526	NA	ENSMUSG00000036687	231832	Tmem184a	5	139802485	139819917	-1	protein_coding	transmembrane protein 184a [Source:MGI Symbol;Acc:MGI:2385897]	transporter(PC00227)	NA	NA	ENSMUSG00000036687
ENSMUSG00000113246	0.851039	-2.3561	1.49903	-1.57175	0.116008	NA	ENSMUSG00000113246	NA	AC155232.1	12	17436618	17446443	1	lincRNA		NA	NA	NA	ENSMUSG00000113246
ENSMUSG00000085918	0.8497	-2.35607	1.59104	-1.48084	0.13865	NA	ENSMUSG00000085918	NA	Gm13032	4	140810993	140817511	1	processed_transcript	predicted gene 13032 [Source:MGI Symbol;Acc:MGI:3702685]	NA	NA	NA	ENSMUSG00000085918
ENSMUSG00000030205	0.746905	-2.35039	3.38289	-0.694789	0.487188	NA	ENSMUSG00000030205	93746	Gprc5d	6	135105991	135118283	-1	protein_coding	G protein-coupled receptor, family C, group 5, member D [Source:MGI Symbol;Acc:MGI:1935037]	G-protein coupled receptor(PC00021)	NA	NA	ENSMUSG00000030205
ENSMUSG00000061330	1.84783	-2.35023	1.21769	-1.93007	0.0535987	1	ENSMUSG00000061330	NA	Gm11361	13	61710587	61711371	-1	processed_pseudogene	predicted pseudogene 11361 [Source:MGI Symbol;Acc:MGI:3649931]	NA	NA	NA	ENSMUSG00000061330
ENSMUSG00000035638	0.806468	-2.34771	1.79045	-1.31124	0.189777	NA	ENSMUSG00000035638	224116	Muc20	16	32777419	32797435	-1	protein_coding	mucin 20 [Source:MGI Symbol;Acc:MGI:2385039]	NA	NA	NA	ENSMUSG00000035638
ENSMUSG00000035861	0.724562	-2.34312	1.46077	-1.60404	0.108706	NA	ENSMUSG00000035861	319875	Tmprss11b	5	86657631	86676362	-1	protein_coding	transmembrane protease, serine 11B [Source:MGI Symbol;Acc:MGI:2442893]	serine protease(PC00203)	NA	NA	ENSMUSG00000035861
ENSMUSG00000103261	1.24669	-2.33946	1.08443	-2.15732	0.0309809	1	ENSMUSG00000103261	NA	Gm36981	3	84058968	84063452	-1	TEC	predicted gene, 36981 [Source:MGI Symbol;Acc:MGI:5610209]	NA	NA	NA	ENSMUSG00000103261
ENSMUSG00000116887	1.21864	-2.33267	1.5858	-1.47097	0.141299	1	ENSMUSG00000116887	NA	NA	NA	NA	NA	NA	NA	NA	NA	NA	NA	ENSMUSG00000116887
ENSMUSG00000107383	33.8084	-2.31712	0.822255	-2.818	0.00483234	0.971251	ENSMUSG00000107383	NA	Gm4366	7	116824510	116825851	-1	processed_pseudogene	predicted gene 4366 [Source:MGI Symbol;Acc:MGI:3782551]	NA	NA	NA	ENSMUSG00000107383
ENSMUSG00000060176	2.13035	-2.30851	1.24804	-1.8497	0.0643568	1	ENSMUSG00000060176	75050	Kif27	13	58287502	58359122	-1	protein_coding	kinesin family member 27 [Source:MGI Symbol;Acc:MGI:1922300]	microtubule binding motor protein(PC00156)	NA	NA	ENSMUSG00000060176
ENSMUSG00000014542	0.314198	-2.30834	3.97745	-0.580357	0.561674	NA	ENSMUSG00000014542	51811	Clec4f	6	83644542	83656187	-1	protein_coding	C-type lectin domain family 4, member f [Source:MGI Symbol;Acc:MGI:1859834]	NA	NA	NA	ENSMUSG00000014542
ENSMUSG00000038132	3.09899	-2.30084	1.35912	-1.69289	0.0904763	1	ENSMUSG00000038132	666794	Rbm24	13	46418434	46431095	1	protein_coding	RNA binding motif protein 24 [Source:MGI Symbol;Acc:MGI:3610364]	NA	NA	NA	ENSMUSG00000038132
ENSMUSG00000092251	0.28376	-2.29434	4.86547	-0.471556	0.637244	NA	ENSMUSG00000092251	NA	Trav9n-1	14	53101801	53102265	1	TR_V_pseudogene	T cell receptor alpha variable 9N-1 [Source:MGI Symbol;Acc:MGI:3809200]	NA	NA	NA	ENSMUSG00000092251
ENSMUSG00000067642	2.96885	-2.28786	1.27872	-1.78918	0.0735852	1	ENSMUSG00000067642	381628	Adgrf3	5	30193431	30205722	-1	protein_coding	adhesion G protein-coupled receptor F3 [Source:MGI Symbol;Acc:MGI:2685887]	NA	NA	NA	ENSMUSG00000067642
ENSMUSG00000070644	2.25974	-2.28309	1.44671	-1.57813	0.114536	1	ENSMUSG00000070644	214253	Etnk2	1	133363572	133380336	1	protein_coding	ethanolamine kinase 2 [Source:MGI Symbol;Acc:MGI:2443760]	kinase(PC00137)	NA	NA	ENSMUSG00000070644
ENSMUSG00000087666	0.621794	-2.27454	1.76537	-1.28842	0.197598	NA	ENSMUSG00000087666	NA	B230359F08Rik	14	53795357	53795963	1	TR_V_gene	RIKEN cDNA B230359F08 gene [Source:MGI Symbol;Acc:MGI:3026946]	NA	NA	NA	ENSMUSG00000087666
ENSMUSG00000084168	1.27415	-2.27441	1.37685	-1.65189	0.098556	1	ENSMUSG00000084168	NA	Atp5l2-ps	11	97768060	97768371	1	processed_pseudogene	ATP synthase, H+ transporting, mitochondrial FO complex, subunit G2, pseudogene [Source:MGI Symbol;Acc:MGI:3649364]	NA	NA	NA	ENSMUSG00000084168
ENSMUSG00000049612	2.81042	-2.27276	1.25572	-1.80992	0.0703078	1	ENSMUSG00000049612	18377	Omg	11	79500982	79504084	-1	protein_coding	oligodendrocyte myelin glycoprotein [Source:MGI Symbol;Acc:MGI:106586]	NA	NA	NA	ENSMUSG00000049612
ENSMUSG00000108379	0.489976	-2.27244	2.34294	-0.969911	0.332091	NA	ENSMUSG00000108379	NA	A730082K24Rik	7	114948650	114983960	1	lincRNA	RIKEN cDNA A730082K24 gene [Source:MGI Symbol;Acc:MGI:2142163]	NA	NA	NA	ENSMUSG00000108379
ENSMUSG00000105830	0.668057	-2.27104	1.65243	-1.37436	0.169331	NA	ENSMUSG00000105830	NA	Trgj2	13	19311245	19311304	-1	TR_J_gene	T cell receptor gamma joining 2 [Source:MGI Symbol;Acc:MGI:4439598]	NA	NA	NA	ENSMUSG00000105830
ENSMUSG00000103439	0.197366	-2.26743	5.48257	-0.413571	0.679188	NA	ENSMUSG00000103439	NA	Gm7019	12	115244185	115244553	-1	processed_pseudogene	predicted pseudogene 7019 [Source:MGI Symbol;Acc:MGI:3645821]	NA	NA	NA	ENSMUSG00000103439
ENSMUSG00000039716	41.359	-2.26422	1.22757	-1.84448	0.0651138	1	ENSMUSG00000039716	208869	Dock3	9	106892825	107231909	-1	protein_coding	dedicator of cyto-kinesis 3 [Source:MGI Symbol;Acc:MGI:2429763]	NA	NA	NA	ENSMUSG00000039716
ENSMUSG00000049382	1.83341	-2.26212	2.08555	-1.08467	NA	NA	ENSMUSG00000049382	16691	Krt8	15	101996711	102004342	-1	protein_coding	keratin 8 [Source:MGI Symbol;Acc:MGI:96705]	NA	NA	NA	ENSMUSG00000049382
ENSMUSG00000086150	13.4127	-2.26093	1.44659	-1.56294	0.118067	1	ENSMUSG00000086150	NA	Bach2os	4	32559680	32571708	-1	antisense_RNA	BTB and CNC homology 2, opposite strand [Source:MGI Symbol;Acc:MGI:3041246]	NA	NA	NA	ENSMUSG00000086150
ENSMUSG00000103710	0.598207	-2.26003	1.41512	-1.59706	0.110251	NA	ENSMUSG00000103710	NA	D030062O11Rik	9	87729285	87732090	1	TEC	RIKEN cDNA D030062O11 gene [Source:MGI Symbol;Acc:MGI:3641918]	NA	NA	NA	ENSMUSG00000103710
ENSMUSG00000085111	0.79237	-2.25989	1.44112	-1.56814	0.116848	NA	ENSMUSG00000085111	67341	Ascl4	10	85927681	85946206	1	protein_coding	achaete-scute family bHLH transcription factor 4 [Source:MGI Symbol;Acc:MGI:1914591]	NA	NA	NA	ENSMUSG00000085111
ENSMUSG00000109321	0.241105	-2.25778	5.02418	-0.449383	0.653155	NA	ENSMUSG00000109321	NA	A330076H08Rik	7	61930137	61982358	-1	processed_transcript	RIKEN cDNA A330076H08 gene [Source:MGI Symbol;Acc:MGI:2443193]	NA	NA	NA	ENSMUSG00000109321
ENSMUSG00000067795	0.198178	-2.25756	5.48282	-0.411752	0.680521	NA	ENSMUSG00000067795	75799	4930444P10Rik	1	16065979	16093325	-1	protein_coding	RIKEN cDNA 4930444P10 gene [Source:MGI Symbol;Acc:MGI:1923049]	NA	NA	NA	ENSMUSG00000067795
ENSMUSG00000076886	0.226514	-2.25631	3.47602	-0.649108	0.516269	NA	ENSMUSG00000076886	NA	Traj44	14	54173690	54173750	1	TR_J_gene	T cell receptor alpha joining 44 [Source:MGI Symbol;Acc:MGI:4439850]	NA	NA	NA	ENSMUSG00000076886
ENSMUSG00000061897	1.07219	-2.25519	2.13807	-1.05478	0.291528	1	ENSMUSG00000061897	NA	Gm14292	2	179177425	179177880	1	processed_pseudogene	predicted gene 14292 [Source:MGI Symbol;Acc:MGI:3649964]	NA	NA	NA	ENSMUSG00000061897
ENSMUSG00000031966	0.135546	-2.25478	5.4829	-0.411239	0.680897	NA	ENSMUSG00000031966	NA	Glb1l3	9	26817953	26860890	-1	protein_coding	galactosidase, beta 1 like 3 [Source:MGI Symbol;Acc:MGI:1918143]	NA	NA	NA	ENSMUSG00000031966
ENSMUSG00000056812	0.135337	-2.25263	5.48295	-0.410842	0.681188	NA	ENSMUSG00000056812	20451	St8sia3	18	64254359	64276146	1	protein_coding	ST8 alpha-N-acetyl-neuraminide alpha-2,8-sialyltransferase 3 [Source:MGI Symbol;Acc:MGI:106019]	NA	NA	NA	ENSMUSG00000056812
ENSMUSG00000045350	0.567243	-2.25223	5.46829	-0.411871	0.680434	NA	ENSMUSG00000045350	72277	Fam186a	15	99918348	99967075	-1	protein_coding	family with sequence similarity 186, member A [Source:MGI Symbol;Acc:MGI:2685766]	NA	NA	NA	ENSMUSG00000045350
ENSMUSG00000099068	0.726326	-2.24812	1.51819	-1.48079	0.138663	NA	ENSMUSG00000099068	NA	Gm27861	6	52161042	52161255	1	misc_RNA	predicted gene, 27861 [Source:MGI Symbol;Acc:MGI:5531243]	NA	NA	NA	ENSMUSG00000099068
ENSMUSG00000094790	2.8306	-2.24781	1.19848	-1.87556	0.060716	1	ENSMUSG00000094790	NA	Gm6625	8	89146787	89147058	-1	processed_pseudogene	predicted gene 6625 [Source:MGI Symbol;Acc:MGI:3647663]	NA	NA	NA	ENSMUSG00000094790
ENSMUSG00000111686	0.37859	-2.24765	4.82718	-0.465623	0.641485	NA	ENSMUSG00000111686	NA	AC159892.1	9	54824661	54825282	-1	processed_pseudogene		NA	NA	NA	ENSMUSG00000111686
ENSMUSG00000005980	0.935268	-2.24382	2.10968	-1.06358	0.287517	1	ENSMUSG00000005980	13419	Dnase1	16	4036942	4040024	1	protein_coding	deoxyribonuclease I [Source:MGI Symbol;Acc:MGI:103157]	NA	NA	NA	ENSMUSG00000005980
ENSMUSG00000081402	0.749527	-2.24325	1.74393	-1.28632	0.198332	NA	ENSMUSG00000081402	NA	Gm15455	1	33836124	33838680	-1	processed_pseudogene	predicted gene 15455 [Source:MGI Symbol;Acc:MGI:3705563]	NA	NA	NA	ENSMUSG00000081402
ENSMUSG00000097078	0.415549	-2.24169	2.95272	-0.759193	0.447737	NA	ENSMUSG00000097078	NA	Gm26566	4	88721805	88722842	1	protein_coding	predicted gene, 26566 [Source:MGI Symbol;Acc:MGI:5477060]	NA	NA	NA	ENSMUSG00000097078
ENSMUSG00000087016	0.315169	-2.24016	2.25534	-0.993268	0.32058	NA	ENSMUSG00000087016	NA	Gm15979	4	135430126	135430841	-1	sense_intronic	predicted gene 15979 [Source:MGI Symbol;Acc:MGI:3801882]	NA	NA	NA	ENSMUSG00000087016
ENSMUSG00000029205	2.69776	-2.23993	1.10437	-2.02825	0.0425352	1	ENSMUSG00000029205	231252	Chrna9	5	65934921	65977326	1	protein_coding	cholinergic receptor, nicotinic, alpha polypeptide 9 [Source:MGI Symbol;Acc:MGI:1202403]	GABA receptor(PC00023)	acetylcholine receptor(PC00037)	NA	ENSMUSG00000029205
ENSMUSG00000086224	0.230747	-2.23784	5.06548	-0.441782	0.658647	NA	ENSMUSG00000086224	NA	2700069I18Rik	3	5177586	5220841	-1	antisense_RNA	RIKEN cDNA 2700069I18 gene [Source:MGI Symbol;Acc:MGI:1919858]	NA	NA	NA	ENSMUSG00000086224
ENSMUSG00000095940	0.853103	-2.23766	1.88872	-1.18475	0.236116	NA	ENSMUSG00000095940	NA	Gm16416	13	103397109	103397591	1	processed_pseudogene	predicted gene 16416 [Source:MGI Symbol;Acc:MGI:3646635]	NA	NA	NA	ENSMUSG00000095940
ENSMUSG00000069308	2.01952	-2.23624	1.54694	-1.44559	0.148293	1	ENSMUSG00000069308	319188	Hist1h2bp	13	21787461	21789213	1	protein_coding	histone cluster 1, H2bp [Source:MGI Symbol;Acc:MGI:2448409]	histone(PC00118)	NA	NA	ENSMUSG00000069308
ENSMUSG00000109190	0.546586	-2.23493	1.60053	-1.39637	0.162605	NA	ENSMUSG00000109190	NA	Gm44621	8	8716924	8721308	-1	lincRNA	predicted gene 44621 [Source:MGI Symbol;Acc:MGI:5753197]	NA	NA	NA	ENSMUSG00000109190
ENSMUSG00000107588	0.133569	-2.23424	5.48343	-0.407454	0.683675	NA	ENSMUSG00000107588	NA	Gm45021	6	48589610	48613250	1	protein_coding	predicted gene 45021 [Source:MGI Symbol;Acc:MGI:5753597]	NA	NA	NA	ENSMUSG00000107588
ENSMUSG00000080478	0.915879	-2.23389	1.55147	-1.43986	0.149908	1	ENSMUSG00000080478	NA	Snord23	7	15938762	15938870	-1	snoRNA	small nucleolar RNA, C/D box 23 [Source:MGI Symbol;Acc:MGI:3819529]	NA	NA	NA	ENSMUSG00000080478
ENSMUSG00000097028	0.133494	-2.23346	5.48345	-0.407309	0.683781	NA	ENSMUSG00000097028	NA	Ptgs2os	1	150074873	150099963	-1	processed_transcript	prostaglandin-endoperoxide synthase 2, opposite strand [Source:MGI Symbol;Acc:MGI:2443180]	NA	NA	NA	ENSMUSG00000097028
ENSMUSG00000022829	0.133442	-2.23299	5.48346	-0.407223	0.683844	NA	ENSMUSG00000022829	207227	Stxbp5l	16	37114942	37384962	-1	protein_coding	syntaxin binding protein 5-like [Source:MGI Symbol;Acc:MGI:2443815]	membrane trafficking regulatory protein(PC00151)	NA	NA	ENSMUSG00000022829
ENSMUSG00000085782	0.190722	-2.23298	5.48346	-0.40722	0.683846	NA	ENSMUSG00000085782	NA	Gm15624	6	83166152	83172755	-1	antisense_RNA	predicted gene 15624 [Source:MGI Symbol;Acc:MGI:3783068]	NA	NA	NA	ENSMUSG00000085782
ENSMUSG00000115293	6.54433	-2.23229	1.31998	-1.69116	0.0908072	1	ENSMUSG00000115293	NA	NA	NA	NA	NA	NA	NA	NA	metalloprotease(PC00153)	NA	NA	ENSMUSG00000115293
ENSMUSG00000085113	0.34128	-2.23166	2.03981	-1.09406	0.27393	NA	ENSMUSG00000085113	NA	B130011K05Rik	11	63413169	63417888	1	lincRNA	RIKEN cDNA B130011K05 gene [Source:MGI Symbol;Acc:MGI:2443995]	NA	NA	NA	ENSMUSG00000085113
ENSMUSG00000020080	0.397154	-2.2299	4.05731	-0.5496	0.582594	NA	ENSMUSG00000020080	216019	Hkdc1	10	62383137	62422491	-1	protein_coding	hexokinase domain containing 1 [Source:MGI Symbol;Acc:MGI:2384910]	NA	NA	NA	ENSMUSG00000020080
ENSMUSG00000092802	2.01322	-2.22927	1.40154	-1.59059	0.111702	1	ENSMUSG00000092802	NA	Gm26460	19	6563780	6563905	1	miRNA	predicted gene, 26460 [Source:MGI Symbol;Acc:MGI:5456237]	NA	NA	NA	ENSMUSG00000092802
ENSMUSG00000066116	0.132969	-2.22805	5.48359	-0.406311	0.684514	NA	ENSMUSG00000066116	NA	Gm10154	4	83505185	83505538	-1	processed_pseudogene	predicted gene 10154 [Source:MGI Symbol;Acc:MGI:3642271]	NA	NA	NA	ENSMUSG00000066116
ENSMUSG00000108514	0.263224	-2.22802	5.02229	-0.443625	0.657313	NA	ENSMUSG00000108514	NA	2310001K20Rik	7	76611065	76612015	1	TEC	RIKEN cDNA 2310001K20 gene [Source:MGI Symbol;Acc:MGI:1923979]	NA	NA	NA	ENSMUSG00000108514
ENSMUSG00000079067	0.593101	-2.22798	5.48359	-0.406299	0.684523	NA	ENSMUSG00000079067	NA	Hmgn2-ps1	5	84123313	84123591	1	processed_pseudogene	high mobility group nucleosomal binding domain 2, pseudogene 1 [Source:MGI Symbol;Acc:MGI:3783162]	NA	NA	NA	ENSMUSG00000079067
ENSMUSG00000097317	0.376637	-2.22776	2.5338	-0.879217	0.379284	NA	ENSMUSG00000097317	NA	Gm17281	2	91250743	91255995	-1	lincRNA	predicted gene, 17281 [Source:MGI Symbol;Acc:MGI:4936915]	NA	NA	NA	ENSMUSG00000097317
ENSMUSG00000099552	0.710851	-2.2276	1.67809	-1.32746	0.184358	NA	ENSMUSG00000099552	NA	9830004L10Rik	1	80184719	80192073	1	lincRNA	RIKEN cDNA 9830004L10 gene [Source:MGI Symbol;Acc:MGI:3642808]	NA	NA	NA	ENSMUSG00000099552
ENSMUSG00000103038	0.626778	-2.22655	1.65865	-1.34238	0.179472	NA	ENSMUSG00000103038	NA	Gm37124	1	137924388	137926379	1	TEC	predicted gene, 37124 [Source:MGI Symbol;Acc:MGI:5610352]	NA	NA	NA	ENSMUSG00000103038
ENSMUSG00000094248	3.00847	-2.2249	1.65085	-1.34773	0.177744	1	ENSMUSG00000094248	665433	Hist1h2ao	13	21810465	21810944	1	protein_coding	histone cluster 1, H2ao [Source:MGI Symbol;Acc:MGI:2448302]	NA	NA	NA	ENSMUSG00000094248
ENSMUSG00000064369	0.508479	-2.22453	1.87502	-1.18641	0.235462	NA	ENSMUSG00000064369	NA	mt-Te	MT	14071	14139	-1	Mt_tRNA	mitochondrially encoded tRNA glutamic acid [Source:MGI Symbol;Acc:MGI:102488]	NA	NA	NA	ENSMUSG00000064369
ENSMUSG00000088208	0.753959	-2.22389	1.56223	-1.42354	0.154581	NA	ENSMUSG00000088208	NA	Gm23751	6	125121724	125121859	1	scaRNA	predicted gene, 23751 [Source:MGI Symbol;Acc:MGI:5453528]	NA	NA	NA	ENSMUSG00000088208
ENSMUSG00000113973	0.223652	-2.22357	5.11818	-0.434445	0.663965	NA	ENSMUSG00000113973	NA	AC125444.5	1	82924917	82925712	1	protein_coding		NA	NA	NA	ENSMUSG00000113973
ENSMUSG00000081064	0.973796	-2.2217	1.47941	-1.50175	0.133162	1	ENSMUSG00000081064	NA	Gm6071	X	22305800	22306274	-1	processed_pseudogene	predicted gene 6071 [Source:MGI Symbol;Acc:MGI:3644647]	NA	NA	NA	ENSMUSG00000081064
ENSMUSG00000091383	0.376878	-2.21876	3.39467	-0.653602	0.513368	NA	ENSMUSG00000091383	NA	Hist1h2al	13	51202727	51203065	-1	processed_pseudogene	histone cluster 1, H2al [Source:MGI Symbol;Acc:MGI:3646032]	NA	NA	NA	ENSMUSG00000091383
ENSMUSG00000116376	0.390217	-2.21737	1.85232	-1.19708	0.231277	NA	ENSMUSG00000116376	NA	NA	NA	NA	NA	NA	NA	NA	NA	NA	NA	ENSMUSG00000116376
ENSMUSG00000044378	0.131623	-2.21384	5.48397	-0.403694	0.686438	NA	ENSMUSG00000044378	277898	Slc15a5	6	137983586	138079916	-1	protein_coding	solute carrier family 15, member 5 [Source:MGI Symbol;Acc:MGI:3607714]	transporter(PC00227)	NA	NA	ENSMUSG00000044378
ENSMUSG00000110657	0.409348	-2.21349	1.88928	-1.1716	0.241356	NA	ENSMUSG00000110657	NA	Gm7684	8	69239202	69240030	-1	processed_pseudogene	predicted gene 7684 [Source:MGI Symbol;Acc:MGI:3644097]	NA	NA	NA	ENSMUSG00000110657
ENSMUSG00000112727	0.750086	-2.21333	1.62347	-1.36334	0.172777	NA	ENSMUSG00000112727	NA	AC153369.2	10	22791319	22792273	1	processed_pseudogene		NA	NA	NA	ENSMUSG00000112727
ENSMUSG00000115456	0.355058	-2.21314	2.02375	-1.09358	0.274137	NA	ENSMUSG00000115456	NA	NA	NA	NA	NA	NA	NA	NA	NA	NA	NA	ENSMUSG00000115456
ENSMUSG00000082580	1.16138	-2.21174	1.8484	-1.19657	0.231473	1	ENSMUSG00000082580	NA	Gm13182	2	3550757	3551068	1	processed_pseudogene	predicted gene 13182 [Source:MGI Symbol;Acc:MGI:3650465]	NA	NA	NA	ENSMUSG00000082580
ENSMUSG00000085860	0.283021	-2.21115	2.54502	-0.868815	0.384948	NA	ENSMUSG00000085860	NA	2410003L11Rik	11	97598511	97622893	1	processed_transcript	RIKEN cDNA 2410003L11 gene [Source:MGI Symbol;Acc:MGI:1916979]	NA	NA	NA	ENSMUSG00000085860
ENSMUSG00000096699	1.35889	-2.21112	1.63809	-1.34982	0.177075	1	ENSMUSG00000096699	NA	Rps19-ps4	18	42252398	42252835	1	processed_pseudogene	ribosomal protein S19, pseudogene 4 [Source:MGI Symbol;Acc:MGI:3645935]	NA	NA	NA	ENSMUSG00000096699
ENSMUSG00000032013	0.951488	-2.21045	2.6353	-0.838785	0.40159	1	ENSMUSG00000032013	72169	Trim29	9	43310848	43336115	1	protein_coding	tripartite motif-containing 29 [Source:MGI Symbol;Acc:MGI:1919419]	NA	NA	NA	ENSMUSG00000032013
ENSMUSG00000110591	0.498232	-2.21031	2.71293	-0.81473	0.415227	NA	ENSMUSG00000110591	NA	Gm31371	8	19903392	19925713	1	protein_coding	predicted gene, 31371 [Source:MGI Symbol;Acc:MGI:5590530]	NA	NA	NA	ENSMUSG00000110591
ENSMUSG00000108085	0.163876	-2.20984	5.32438	-0.415042	0.678111	NA	ENSMUSG00000108085	NA	A930014E10Rik	6	142971752	142973818	1	lincRNA	RIKEN cDNA A930014E10 gene [Source:MGI Symbol;Acc:MGI:1925685]	NA	NA	NA	ENSMUSG00000108085
ENSMUSG00000031424	0.161708	-2.20891	5.33878	-0.413748	0.679059	NA	ENSMUSG00000031424	245616	Kir3dl1	X	136517999	136534309	1	protein_coding	killer cell immunoglobulin-like receptor, three domains, long cytoplasmic tail, 1 [Source:MGI Symbol;Acc:MGI:2652397]	NA	NA	NA	ENSMUSG00000031424
ENSMUSG00000069248	0.130835	-2.20553	5.48419	-0.402161	0.687565	NA	ENSMUSG00000069248	435350	Serpinb6e	13	33832345	33843408	-1	protein_coding	serine (or cysteine) peptidase inhibitor, clade B, member 6e [Source:MGI Symbol;Acc:MGI:2667778]	serine protease inhibitor(PC00204)	NA	NA	ENSMUSG00000069248
ENSMUSG00000114120	0.16056	-2.20552	5.48419	-0.40216	0.687567	NA	ENSMUSG00000114120	NA	AC153663.3	12	24302807	24308251	-1	unprocessed_pseudogene		NA	NA	NA	ENSMUSG00000114120
ENSMUSG00000083596	0.731947	-2.20545	5.48419	-0.402147	0.687576	NA	ENSMUSG00000083596	NA	Rpl21-ps15	X	151215167	151215649	-1	processed_pseudogene	ribosomal protein L21, pseudogene 15 [Source:MGI Symbol;Acc:MGI:3705426]	NA	NA	NA	ENSMUSG00000083596
ENSMUSG00000102985	0.194396	-2.20419	5.17649	-0.425807	0.670248	NA	ENSMUSG00000102985	NA	4930456G14Rik	1	40049039	40050368	-1	TEC	RIKEN cDNA 4930456G14 gene [Source:MGI Symbol;Acc:MGI:1921928]	NA	NA	NA	ENSMUSG00000102985
ENSMUSG00000087549	0.464863	-2.20404	1.83035	-1.20416	0.228528	NA	ENSMUSG00000087549	NA	Gm13427	2	31676364	31688469	-1	antisense_RNA	predicted gene 13427 [Source:MGI Symbol;Acc:MGI:3650808]	NA	NA	NA	ENSMUSG00000087549
ENSMUSG00000079580	0.130668	-2.20366	5.48424	-0.401817	0.687819	NA	ENSMUSG00000079580	71138	Tmem217	17	29526033	29549593	-1	protein_coding	transmembrane protein 217 [Source:MGI Symbol;Acc:MGI:3646280]	NA	NA	NA	ENSMUSG00000079580
ENSMUSG00000114728	0.609977	-2.20226	1.61565	-1.36308	0.172857	NA	ENSMUSG00000114728	NA	AC154840.1	14	20856014	20856421	-1	processed_pseudogene		NA	NA	NA	ENSMUSG00000114728
ENSMUSG00000102603	0.191073	-2.19961	5.19379	-0.423507	0.671925	NA	ENSMUSG00000102603	NA	Olfr431-ps1	1	174051998	174052541	1	unprocessed_pseudogene	olfactory receptor 431, pseudogene 1 [Source:MGI Symbol;Acc:MGI:3030265]	NA	NA	NA	ENSMUSG00000102603
ENSMUSG00000098468	0.130278	-2.19951	5.48435	-0.401052	0.688382	NA	ENSMUSG00000098468	NA	Gm27186	9	73060951	73061257	1	processed_pseudogene	predicted gene 27186 [Source:MGI Symbol;Acc:MGI:5521029]	NA	NA	NA	ENSMUSG00000098468
ENSMUSG00000114068	0.443439	-2.19775	2.06944	-1.062	0.288234	NA	ENSMUSG00000114068	NA	CT010431.1	13	13514738	13515817	1	TEC		NA	NA	NA	ENSMUSG00000114068
ENSMUSG00000030483	0.248904	-2.19494	5.03722	-0.435744	0.663022	NA	ENSMUSG00000030483	13088	Cyp2b10	7	25897620	25926624	1	protein_coding	cytochrome P450, family 2, subfamily b, polypeptide 10 [Source:MGI Symbol;Acc:MGI:88598]	NA	NA	NA	ENSMUSG00000030483
ENSMUSG00000031881	0.564614	-2.19133	2.3365	-0.937868	0.348312	NA	ENSMUSG00000031881	12556	Cdh16	8	104601911	104624396	-1	protein_coding	cadherin 16 [Source:MGI Symbol;Acc:MGI:106671]	NA	NA	NA	ENSMUSG00000031881
ENSMUSG00000030491	2.42785	-2.19114	1.51101	-1.45011	0.147028	1	ENSMUSG00000030491	71981	Tdrd12	7	35469098	35537745	-1	protein_coding	tudor domain containing 12 [Source:MGI Symbol;Acc:MGI:1919231]	nuclease(PC00170)	NA	NA	ENSMUSG00000030491
ENSMUSG00000098217	0.314877	-2.19043	2.54291	-0.861389	0.389024	NA	ENSMUSG00000098217	NA	Gm27046	4	83597303	83597765	1	processed_pseudogene	predicted gene, 27046 [Source:MGI Symbol;Acc:MGI:5504161]	NA	NA	NA	ENSMUSG00000098217
ENSMUSG00000031074	0.220444	-2.19035	5.12769	-0.427161	0.669262	NA	ENSMUSG00000031074	14174	Fgf3	7	144838083	144844436	1	protein_coding	fibroblast growth factor 3 [Source:MGI Symbol;Acc:MGI:95517]	NA	NA	NA	ENSMUSG00000031074
ENSMUSG00000042940	0.157748	-2.18847	5.48465	-0.399018	0.68988	NA	ENSMUSG00000042940	NA	9230106D20Rik	10	19644750	19660801	1	lincRNA	RIKEN cDNA 9230106D20 gene [Source:MGI Symbol;Acc:MGI:3045371]	NA	NA	NA	ENSMUSG00000042940
ENSMUSG00000087621	0.280524	-2.18779	2.93287	-0.745954	0.455695	NA	ENSMUSG00000087621	NA	1700003G18Rik	7	116081759	116093159	-1	processed_transcript	RIKEN cDNA 1700003G18 gene [Source:MGI Symbol;Acc:MGI:1916600]	NA	NA	NA	ENSMUSG00000087621
ENSMUSG00000115041	1.44925	-2.18764	1.31436	-1.66441	0.0960312	1	ENSMUSG00000115041	NA	NA	NA	NA	NA	NA	NA	NA	NA	NA	NA	ENSMUSG00000115041
ENSMUSG00000107385	0.945817	-2.18538	1.43786	-1.51989	0.12854	1	ENSMUSG00000107385	NA	C330024D21Rik	5	67463897	67477632	1	processed_transcript	RIKEN cDNA C330024D21 gene [Source:MGI Symbol;Acc:MGI:2444116]	NA	NA	NA	ENSMUSG00000107385
ENSMUSG00000038925	0.786207	-2.18478	1.41933	-1.5393	0.123732	NA	ENSMUSG00000038925	105418	E330034G19Rik	14	24293214	24309966	1	protein_coding	RIKEN cDNA E330034G19 gene [Source:MGI Symbol;Acc:MGI:2145557]	NA	NA	NA	ENSMUSG00000038925
ENSMUSG00000112898	0.190208	-2.18406	5.19629	-0.420311	0.674258	NA	ENSMUSG00000112898	NA	AC159619.1	12	42117824	42151840	-1	lincRNA		NA	NA	NA	ENSMUSG00000112898
ENSMUSG00000054034	0.190171	-2.18387	5.48477	-0.39817	0.690505	NA	ENSMUSG00000054034	331532	Tceal5	X	136200948	136203876	-1	protein_coding	transcription elongation factor A (SII)-like 5 [Source:MGI Symbol;Acc:MGI:3036236]	transcription factor(PC00218)	NA	NA	ENSMUSG00000054034
ENSMUSG00000084199	1.13229	-2.18253	1.33059	-1.64027	0.100949	1	ENSMUSG00000084199	NA	Gm12422	4	47071646	47071947	-1	processed_pseudogene	predicted gene 12422 [Source:MGI Symbol;Acc:MGI:3651148]	NA	NA	NA	ENSMUSG00000084199
ENSMUSG00000065273	1.04339	-2.1813	1.37938	-1.58136	0.113796	1	ENSMUSG00000065273	NA	Gm25128	17	35247175	35247250	1	snoRNA	predicted gene, 25128 [Source:MGI Symbol;Acc:MGI:5454905]	NA	NA	NA	ENSMUSG00000065273
ENSMUSG00000069998	0.840991	-2.17953	1.70849	-1.27571	0.202059	NA	ENSMUSG00000069998	404315	Olfr372	8	72041218	72060630	1	protein_coding	olfactory receptor 372 [Source:MGI Symbol;Acc:MGI:3030206]	NA	NA	NA	ENSMUSG00000069998
ENSMUSG00000112632	1.25555	-2.1784	1.41442	-1.54014	0.123527	1	ENSMUSG00000112632	NA	AC124360.2	10	126185897	126186323	-1	processed_pseudogene		NA	NA	NA	ENSMUSG00000112632
ENSMUSG00000098656	0.295235	-2.17691	3.41916	-0.63668	0.524334	NA	ENSMUSG00000098656	NA	Mir7028	5	114719515	114719578	1	miRNA	microRNA 7028 [Source:MGI Symbol;Acc:MGI:5531056]	NA	NA	NA	ENSMUSG00000098656
ENSMUSG00000111341	1.31436	-2.17487	1.27049	-1.71183	0.0869277	1	ENSMUSG00000111341	NA	AC165080.3	9	121843822	121846937	-1	TEC		NA	NA	NA	ENSMUSG00000111341
ENSMUSG00000115424	0.718942	-2.17486	1.40855	-1.54404	0.122578	NA	ENSMUSG00000115424	NA	NA	NA	NA	NA	NA	NA	NA	NA	NA	NA	ENSMUSG00000115424
ENSMUSG00000041287	0.611863	-2.17442	1.53624	-1.41542	0.156945	NA	ENSMUSG00000041287	20670	Sox15	11	69655314	69656727	1	protein_coding	SRY (sex determining region Y)-box 15 [Source:MGI Symbol;Acc:MGI:98363]	HMG box transcription factor(PC00024)	NA	NA	ENSMUSG00000041287
ENSMUSG00000106275	0.297491	-2.17406	2.40541	-0.903819	0.366092	NA	ENSMUSG00000106275	NA	Gm42495	5	128444416	128447731	1	lincRNA	predicted gene 42495 [Source:MGI Symbol;Acc:MGI:5662632]	NA	NA	NA	ENSMUSG00000106275
ENSMUSG00000038403	0.320182	-2.17271	4.81932	-0.450834	0.652109	NA	ENSMUSG00000038403	69585	Hfe2	3	96525172	96529210	1	protein_coding	hemochromatosis type 2 (juvenile) [Source:MGI Symbol;Acc:MGI:1916835]	NA	NA	NA	ENSMUSG00000038403
ENSMUSG00000085876	0.399665	-2.17151	2.17533	-0.998245	0.318161	NA	ENSMUSG00000085876	NA	Gm12409	4	45762377	45764223	-1	processed_transcript	predicted gene 12409 [Source:MGI Symbol;Acc:MGI:3649923]	NA	NA	NA	ENSMUSG00000085876
ENSMUSG00000083017	0.426817	-2.16991	1.79264	-1.21045	0.226104	NA	ENSMUSG00000083017	NA	Gm12163	11	45813604	45813992	1	processed_pseudogene	predicted gene 12163 [Source:MGI Symbol;Acc:MGI:3650636]	NA	NA	NA	ENSMUSG00000083017
ENSMUSG00000107035	2.12056	-2.16804	1.32385	-1.63768	0.101488	1	ENSMUSG00000107035	NA	Ybx1-ps2	6	37686239	37687195	-1	processed_pseudogene	Y box protein 1, pseudogene 2 [Source:MGI Symbol;Acc:MGI:2137671]	NA	NA	NA	ENSMUSG00000107035
ENSMUSG00000113750	1.24076	-2.16774	1.39989	-1.54851	0.1215	1	ENSMUSG00000113750	NA	CT009754.6	13	17949908	17950956	1	processed_pseudogene		NA	NA	NA	ENSMUSG00000113750
ENSMUSG00000097561	0.638733	-2.16671	2.05648	-1.0536	0.292064	NA	ENSMUSG00000097561	NA	4632411P08Rik	5	29378699	29390488	1	lincRNA	RIKEN cDNA 4632411P08 gene [Source:MGI Symbol;Acc:MGI:1925513]	NA	NA	NA	ENSMUSG00000097561
ENSMUSG00000102970	2.07476	-2.16465	1.27281	-1.70069	0.0890014	1	ENSMUSG00000102970	NA	Gm37349	1	191597647	191598270	1	TEC	predicted gene, 37349 [Source:MGI Symbol;Acc:MGI:5610577]	NA	NA	NA	ENSMUSG00000102970
ENSMUSG00000026125	0.785268	-2.16321	1.74909	-1.23676	0.216175	NA	ENSMUSG00000026125	21755	Prss39	1	34498410	34503063	1	protein_coding	protease, serine 39 [Source:MGI Symbol;Acc:MGI:1270856]	annexin(PC00050)	calmodulin(PC00061)	peptide hormone(PC00179)	ENSMUSG00000026125
ENSMUSG00000073130	2.20421	-2.15634	1.26322	-1.70702	0.0878177	1	ENSMUSG00000073130	NA	Gm1141	X	71921002	71940870	1	protein_coding	predicted gene 1141 [Source:MGI Symbol;Acc:MGI:2685987]	NA	NA	NA	ENSMUSG00000073130
ENSMUSG00000079243	3.01729	-2.15441	1.25434	-1.71757	0.0858758	1	ENSMUSG00000079243	22437	Xirp1	9	120013755	120023598	-1	protein_coding	xin actin-binding repeat containing 1 [Source:MGI Symbol;Acc:MGI:1333878]	NA	NA	NA	ENSMUSG00000079243
ENSMUSG00000092216	0.337782	-2.15316	3.35583	-0.641619	0.521121	NA	ENSMUSG00000092216	100502736	Gm19345	7	19852003	19858350	1	protein_coding	predicted gene, 19345 [Source:MGI Symbol;Acc:MGI:5011530]	NA	NA	NA	ENSMUSG00000092216
ENSMUSG00000037738	0.563639	-2.1484	1.97229	-1.0893	0.276023	NA	ENSMUSG00000037738	330721	Nek5	8	22073616	22125053	-1	protein_coding	NIMA (never in mitosis gene a)-related expressed kinase 5 [Source:MGI Symbol;Acc:MGI:2142824]	NA	NA	NA	ENSMUSG00000037738
ENSMUSG00000055567	0.735502	-2.14565	2.89244	-0.741811	0.458202	NA	ENSMUSG00000055567	329178	Unc80	1	66468367	66699148	1	protein_coding	unc-80, NALCN activator [Source:MGI Symbol;Acc:MGI:2652882]	NA	NA	NA	ENSMUSG00000055567
ENSMUSG00000075587	2.24693	-2.14133	1.28028	-1.67255	0.0944156	1	ENSMUSG00000075587	NA	Gm11531	11	96392112	96392666	1	processed_pseudogene	predicted gene 11531 [Source:MGI Symbol;Acc:MGI:3650260]	NA	NA	NA	ENSMUSG00000075587
ENSMUSG00000067206	1.89037	-2.13944	1.66821	-1.28248	0.199676	1	ENSMUSG00000067206	231296	Lrrc66	5	73606642	73632526	-1	protein_coding	leucine rich repeat containing 66 [Source:MGI Symbol;Acc:MGI:2387634]	NA	NA	NA	ENSMUSG00000067206
ENSMUSG00000110422	0.559392	-2.13899	1.66578	-1.28408	0.199114	NA	ENSMUSG00000110422	NA	Gm17999	8	83267086	83267627	1	processed_pseudogene	predicted gene, 17999 [Source:MGI Symbol;Acc:MGI:5010184]	NA	NA	NA	ENSMUSG00000110422
ENSMUSG00000054889	3.04988	-2.13748	1.85179	-1.15428	NA	NA	ENSMUSG00000054889	109620	Dsp	13	38151294	38198577	1	protein_coding	desmoplakin [Source:MGI Symbol;Acc:MGI:109611]	intermediate filament binding protein(PC00130)	NA	NA	ENSMUSG00000054889
ENSMUSG00000041674	0.761922	-2.13673	2.72727	-0.783467	0.433353	NA	ENSMUSG00000041674	NA	BC006965	11	112663927	112781976	-1	processed_transcript	cDNA sequence BC006965 [Source:MGI Symbol;Acc:MGI:2384955]	NA	NA	NA	ENSMUSG00000041674
ENSMUSG00000030032	4.55579	-2.13632	0.888684	-2.40392	0.0162205	1	ENSMUSG00000030032	75659	Wdr54	6	83149361	83156397	-1	protein_coding	WD repeat domain 54 [Source:MGI Symbol;Acc:MGI:1922909]	NA	NA	NA	ENSMUSG00000030032
ENSMUSG00000111897	0.691998	-2.13027	4.05737	-0.525038	0.599557	NA	ENSMUSG00000111897	NA	AC151846.1	10	79888712	79888962	1	processed_pseudogene		NA	NA	NA	ENSMUSG00000111897
ENSMUSG00000075268	0.376407	-2.12712	5.48633	-0.387713	0.698228	NA	ENSMUSG00000075268	NA	Gm10819	19	16267061	16267621	-1	processed_pseudogene	predicted gene 10819 [Source:MGI Symbol;Acc:MGI:3642135]	NA	NA	NA	ENSMUSG00000075268
ENSMUSG00000026344	20.353	-2.12233	1.12685	-1.88342	0.0596433	1	ENSMUSG00000026344	72585	Lypd1	1	125867622	125913101	-1	protein_coding	Ly6/Plaur domain containing 1 [Source:MGI Symbol;Acc:MGI:1919835]	NA	NA	NA	ENSMUSG00000026344
ENSMUSG00000035964	4.66291	-2.11728	0.985036	-2.14945	0.0315989	1	ENSMUSG00000035964	67937	Tmem59l	8	70483867	70487358	-1	protein_coding	transmembrane protein 59-like [Source:MGI Symbol;Acc:MGI:1915187]	NA	NA	NA	ENSMUSG00000035964
ENSMUSG00000016942	1.14364	-2.11474	3.86236	-0.547525	0.584018	1	ENSMUSG00000016942	71753	Tmprss6	15	78439668	78468634	-1	protein_coding	transmembrane serine protease 6 [Source:MGI Symbol;Acc:MGI:1919003]	serine protease(PC00203)	NA	NA	ENSMUSG00000016942
ENSMUSG00000085558	5.31123	-2.11207	0.880022	-2.40002	0.0163941	1	ENSMUSG00000085558	NA	4930412C18Rik	4	9770585	9823411	1	processed_transcript	RIKEN cDNA 4930412C18 gene [Source:MGI Symbol;Acc:MGI:2443490]	NA	NA	NA	ENSMUSG00000085558
ENSMUSG00000092412	11.5591	-2.10996	1.14483	-1.84303	0.0653242	1	ENSMUSG00000092412	NA	Gm20507	17	33630759	33645705	1	processed_transcript	predicted gene 20507 [Source:MGI Symbol;Acc:MGI:5141972]	NA	NA	NA	ENSMUSG00000092412
ENSMUSG00000021198	5.68771	-2.10779	1.3741	-1.53395	0.125043	1	ENSMUSG00000021198	217843	Unc79	12	102948859	103184065	1	protein_coding	unc-79 homolog (C. elegans) [Source:MGI Symbol;Acc:MGI:2684729]	NA	NA	NA	ENSMUSG00000021198
ENSMUSG00000040584	259.151	-2.10497	0.947224	-2.22225	0.0262662	1	ENSMUSG00000040584	18671	Abcb1a	5	8660077	8748575	1	protein_coding	ATP-binding cassette, sub-family B (MDR/TAP), member 1A [Source:MGI Symbol;Acc:MGI:97570]	cysteine protease(PC00081)	serine protease(PC00203)	NA	ENSMUSG00000040584
ENSMUSG00000050944	38.7032	-2.08438	1.0024	-2.07938	0.0375824	1	ENSMUSG00000050944	319634	Efcab5	11	77089915	77188968	-1	protein_coding	EF-hand calcium binding domain 5 [Source:MGI Symbol;Acc:MGI:2442440]	NA	NA	NA	ENSMUSG00000050944
ENSMUSG00000064995	1.93041	-2.07998	1.50381	-1.38313	0.166624	1	ENSMUSG00000064995	NA	Gm26003	2	158358360	158358472	-1	snoRNA	predicted gene, 26003 [Source:MGI Symbol;Acc:MGI:5455780]	NA	NA	NA	ENSMUSG00000064995
ENSMUSG00000029054	1.92354	-2.07666	0.930259	-2.23234	0.0255922	1	ENSMUSG00000029054	14403	Gabrd	4	155384980	155398112	-1	protein_coding	gamma-aminobutyric acid (GABA) A receptor, subunit delta [Source:MGI Symbol;Acc:MGI:95622]	GABA receptor(PC00023)	acetylcholine receptor(PC00037)	NA	ENSMUSG00000029054
ENSMUSG00000112502	1.38738	-2.06798	1.07432	-1.92492	0.054239	1	ENSMUSG00000112502	NA	AC153889.4	10	82009481	82009800	-1	processed_pseudogene		NA	NA	NA	ENSMUSG00000112502
ENSMUSG00000020911	1.59561	-2.06622	1.65005	-1.25222	0.210491	1	ENSMUSG00000020911	16669	Krt19	11	100140810	100148665	-1	protein_coding	keratin 19 [Source:MGI Symbol;Acc:MGI:96693]	NA	NA	NA	ENSMUSG00000020911
ENSMUSG00000105555	0.669838	-2.06077	1.49571	-1.37778	0.16827	NA	ENSMUSG00000105555	NA	Gm43856	5	104971695	104972063	-1	TEC	predicted gene 43856 [Source:MGI Symbol;Acc:MGI:5663993]	NA	NA	NA	ENSMUSG00000105555
ENSMUSG00000110289	1.11415	-2.05717	1.30133	-1.58082	0.113918	1	ENSMUSG00000110289	NA	4930412F12Rik	8	57650889	57652359	-1	TEC	RIKEN cDNA 4930412F12 gene [Source:MGI Symbol;Acc:MGI:1922099]	NA	NA	NA	ENSMUSG00000110289
ENSMUSG00000068037	0.410172	-2.05275	3.85697	-0.532218	0.594575	NA	ENSMUSG00000068037	17171	Mas1	17	12841079	12868143	-1	protein_coding	MAS1 oncogene [Source:MGI Symbol;Acc:MGI:96918]	NA	NA	NA	ENSMUSG00000068037
ENSMUSG00000098547	0.756578	-2.04799	1.4188	-1.44347	0.148888	NA	ENSMUSG00000098547	NA	Mir6921	11	60200538	60200617	-1	miRNA	microRNA 6921 [Source:MGI Symbol;Acc:MGI:5530734]	NA	NA	NA	ENSMUSG00000098547
ENSMUSG00000100760	2.38842	-2.04782	1.23041	-1.66434	0.0960446	1	ENSMUSG00000100760	NA	Gm4035	13	37421833	37435149	-1	lincRNA	predicted gene 4035 [Source:MGI Symbol;Acc:MGI:3782209]	NA	NA	NA	ENSMUSG00000100760
ENSMUSG00000059835	2.62054	-2.03494	1.27618	-1.59455	0.110812	1	ENSMUSG00000059835	NA	Rpl13-ps3	14	58893506	58894129	1	processed_pseudogene	ribosomal protein L13, pseudogene 3 [Source:MGI Symbol;Acc:MGI:3646682]	NA	NA	NA	ENSMUSG00000059835
ENSMUSG00000114455	1.45028	-2.03368	1.24266	-1.63655	0.101724	1	ENSMUSG00000114455	NA	AC154515.2	14	14123570	14123975	1	processed_pseudogene		NA	NA	NA	ENSMUSG00000114455
ENSMUSG00000097248	0.963108	-2.03328	2.13964	-0.95029	0.341965	1	ENSMUSG00000097248	NA	Gm2694	8	87460469	87525554	1	lincRNA	predicted gene 2694 [Source:MGI Symbol;Acc:MGI:3780864]	NA	NA	NA	ENSMUSG00000097248
ENSMUSG00000109291	2.35545	-2.02661	0.849235	-2.3864	0.0170142	1	ENSMUSG00000109291	NA	Gm2814	8	10898169	10900558	-1	lincRNA	predicted gene 2814 [Source:MGI Symbol;Acc:MGI:3780984]	NA	NA	NA	ENSMUSG00000109291
ENSMUSG00000082399	5.37236	-2.02661	1.58449	-1.27903	0.200887	1	ENSMUSG00000082399	NA	Gm14036	2	134803949	134804428	1	processed_pseudogene	predicted gene 14036 [Source:MGI Symbol;Acc:MGI:3649581]	NA	NA	NA	ENSMUSG00000082399
ENSMUSG00000031870	0.467128	-2.02531	5.44393	-0.372032	0.709869	NA	ENSMUSG00000031870	18667	Pgr	9	8899833	8968611	1	protein_coding	progesterone receptor [Source:MGI Symbol;Acc:MGI:97567]	C4 zinc finger nuclear receptor(PC00169)	nucleic acid binding(PC00171)	receptor(PC00197)	ENSMUSG00000031870
ENSMUSG00000106718	0.282519	-2.02451	4.92134	-0.411374	0.680798	NA	ENSMUSG00000106718	NA	Gm20052	5	37893772	37897917	1	lincRNA	predicted gene, 20052 [Source:MGI Symbol;Acc:MGI:5012237]	NA	NA	NA	ENSMUSG00000106718
ENSMUSG00000064405	1.4991	-2.02278	1.64869	-1.2269	0.219859	1	ENSMUSG00000064405	NA	Gm23925	2	158359798	158359929	-1	snoRNA	predicted gene, 23925 [Source:MGI Symbol;Acc:MGI:5453702]	NA	NA	NA	ENSMUSG00000064405
ENSMUSG00000098158	1.49012	-2.02244	1.40961	-1.43475	0.151357	1	ENSMUSG00000098158	NA	Gm4804	12	15606412	15729095	1	transcribed_processed_pseudogene	predicted gene 4804 [Source:MGI Symbol;Acc:MGI:3646648]	NA	NA	NA	ENSMUSG00000098158
ENSMUSG00000052241	2.19348	-2.02021	1.03475	-1.95238	0.0508934	1	ENSMUSG00000052241	NA	A930035D04Rik	6	47453776	47454320	-1	pseudogene	RIKEN cDNA A930035D04 gene [Source:MGI Symbol;Acc:MGI:2445106]	NA	NA	NA	ENSMUSG00000052241
ENSMUSG00000023084	8.79407	-2.01899	1.18353	-1.7059	0.0880263	1	ENSMUSG00000023084	74485	Lrrc71	3	87736923	87748625	-1	protein_coding	leucine rich repeat containing 71 [Source:MGI Symbol;Acc:MGI:1921735]	NA	NA	NA	ENSMUSG00000023084
ENSMUSG00000039611	32.2994	-2.01765	0.948305	-2.12764	0.0333672	1	ENSMUSG00000039611	67063	Tmem246	4	49584506	49597876	-1	protein_coding	transmembrane protein 246 [Source:MGI Symbol;Acc:MGI:1914313]	NA	NA	NA	ENSMUSG00000039611
ENSMUSG00000032680	0.947475	-2.0125	1.74363	-1.1542	0.248417	1	ENSMUSG00000032680	228778	6820408C15Rik	2	152415587	152444330	1	protein_coding	RIKEN cDNA 6820408C15 gene [Source:MGI Symbol;Acc:MGI:3045333]	NA	NA	NA	ENSMUSG00000032680
ENSMUSG00000097884	0.5293	-2.0111	2.39111	-0.841075	0.400306	NA	ENSMUSG00000097884	NA	Gm26543	10	49219422	49225653	-1	sense_intronic	predicted gene, 26543 [Source:MGI Symbol;Acc:MGI:5477037]	NA	NA	NA	ENSMUSG00000097884
ENSMUSG00000102952	0.497927	-2.00902	2.50812	-0.801006	0.423128	NA	ENSMUSG00000102952	NA	Ighv1-25	12	114781409	114781834	-1	IG_V_pseudogene	immunoglobulin heavy variable 1-25 [Source:MGI Symbol;Acc:MGI:3648295]	NA	NA	NA	ENSMUSG00000102952
ENSMUSG00000079008	0.55757	-2.00842	1.95148	-1.02918	0.303395	NA	ENSMUSG00000079008	100216455	Gm14124	2	150257517	150270300	1	protein_coding	predicted gene 14124 [Source:MGI Symbol;Acc:MGI:3652002]	KRAB box transcription factor(PC00029)	NA	NA	ENSMUSG00000079008
ENSMUSG00000083327	4.56695	-2.00835	3.15783	-0.635992	0.524782	1	ENSMUSG00000083327	NA	Vcp-rs	X	104345829	104348234	-1	processed_pseudogene	valosin containing protein, related sequence [Source:MGI Symbol;Acc:MGI:894298]	NA	NA	NA	ENSMUSG00000083327
ENSMUSG00000045662	1.9512	-2.00743	0.977361	-2.05393	0.0399823	1	ENSMUSG00000045662	66715	Henmt1	3	108939873	108960774	1	protein_coding	HEN1 methyltransferase homolog 1 (Arabidopsis) [Source:MGI Symbol;Acc:MGI:1913965]	NA	NA	NA	ENSMUSG00000045662
ENSMUSG00000071202	0.565719	-2.00597	1.67893	-1.19479	0.23217	NA	ENSMUSG00000071202	381077	Ccdc78	17	25786580	25790513	1	protein_coding	coiled-coil domain containing 78 [Source:MGI Symbol;Acc:MGI:2685784]	NA	NA	NA	ENSMUSG00000071202
ENSMUSG00000106818	0.675763	-2.00562	1.6271	-1.23263	0.217713	NA	ENSMUSG00000106818	NA	Gm43790	5	66321005	66323017	-1	TEC	predicted gene 43790 [Source:MGI Symbol;Acc:MGI:5663927]	NA	NA	NA	ENSMUSG00000106818
ENSMUSG00000030996	0.39739	-2.0054	2.53052	-0.792484	0.428078	NA	ENSMUSG00000030996	11870	Art1	7	102101743	102113933	1	protein_coding	ADP-ribosyltransferase 1 [Source:MGI Symbol;Acc:MGI:107511]	NA	NA	NA	ENSMUSG00000030996
ENSMUSG00000104658	0.331148	-2.00432	2.17999	-0.919419	0.357876	NA	ENSMUSG00000104658	NA	Gm30275	14	54067579	54125395	-1	antisense_RNA	predicted gene, 30275 [Source:MGI Symbol;Acc:MGI:5589434]	NA	NA	NA	ENSMUSG00000104658
ENSMUSG00000096960	0.50884	-2.003	1.63769	-1.22306	0.221306	NA	ENSMUSG00000096960	NA	A230028O05Rik	16	25059639	25069058	1	lincRNA	RIKEN cDNA A230028O05 gene [Source:MGI Symbol;Acc:MGI:2442126]	NA	NA	NA	ENSMUSG00000096960
ENSMUSG00000081314	0.561098	-2.00244	1.75256	-1.14258	0.253215	NA	ENSMUSG00000081314	NA	Gm14132	2	149333071	149334789	-1	processed_pseudogene	predicted gene 14132 [Source:MGI Symbol;Acc:MGI:3652226]	NA	NA	NA	ENSMUSG00000081314
ENSMUSG00000101880	0.309646	-2.00215	2.87041	-0.697514	0.485481	NA	ENSMUSG00000101880	NA	Gm29282	1	155011332	155057179	-1	lincRNA	predicted gene 29282 [Source:MGI Symbol;Acc:MGI:5579988]	NA	NA	NA	ENSMUSG00000101880
ENSMUSG00000024409	2.12456	-2.00095	1.41854	-1.41057	0.158371	1	ENSMUSG00000024409	57390	Psors1c2	17	35533201	35534647	1	protein_coding	psoriasis susceptibility 1 candidate 2 (human) [Source:MGI Symbol;Acc:MGI:1930025]	NA	NA	NA	ENSMUSG00000024409
ENSMUSG00000105633	0.699944	-1.99546	1.49662	-1.33332	0.182428	NA	ENSMUSG00000105633	NA	Gm32158	5	140546435	140546838	1	processed_pseudogene	predicted gene, 32158 [Source:MGI Symbol;Acc:MGI:5591317]	NA	NA	NA	ENSMUSG00000105633
ENSMUSG00000064039	0.547932	-1.9952	1.98249	-1.00641	0.314217	NA	ENSMUSG00000064039	12770	Ccr1l1	9	123977243	123978408	-1	protein_coding	chemokine (C-C motif) receptor 1-like 1 [Source:MGI Symbol;Acc:MGI:104617]	NA	NA	NA	ENSMUSG00000064039
ENSMUSG00000106053	0.719919	-1.99262	1.52286	-1.30847	0.190714	NA	ENSMUSG00000106053	NA	Gm20752	3	159076364	159308081	1	lincRNA	predicted gene, 20752 [Source:MGI Symbol;Acc:MGI:5434108]	NA	NA	NA	ENSMUSG00000106053
ENSMUSG00000085975	0.402241	-1.99221	2.00184	-0.995188	0.319645	NA	ENSMUSG00000085975	NA	Gm13572	2	60037141	60038837	1	lincRNA	predicted gene 13572 [Source:MGI Symbol;Acc:MGI:3652224]	NA	NA	NA	ENSMUSG00000085975
ENSMUSG00000026304	0.336254	-1.99219	4.89087	-0.40733	0.683766	NA	ENSMUSG00000026304	19329	Rab17	1	90958133	90969661	-1	protein_coding	RAB17, member RAS oncogene family [Source:MGI Symbol;Acc:MGI:104640]	NA	NA	NA	ENSMUSG00000026304
ENSMUSG00000081565	1.43864	-1.99191	1.5515	-1.28386	0.199192	1	ENSMUSG00000081565	NA	Rps12-ps5	7	30263263	30263651	1	processed_pseudogene	ribosomal protein S12, pseudogene 5 [Source:MGI Symbol;Acc:MGI:3644977]	NA	NA	NA	ENSMUSG00000081565
ENSMUSG00000109199	0.434504	-1.99015	2.26197	-0.879831	0.378951	NA	ENSMUSG00000109199	NA	Gm44996	7	89388344	89391323	-1	TEC	predicted gene 44996 [Source:MGI Symbol;Acc:MGI:5753572]	NA	NA	NA	ENSMUSG00000109199
ENSMUSG00000065041	2.56012	-1.98962	1.82866	-1.08802	0.276586	1	ENSMUSG00000065041	NA	Gm24044	9	120128780	120128935	1	snoRNA	predicted gene, 24044 [Source:MGI Symbol;Acc:MGI:5453821]	NA	NA	NA	ENSMUSG00000065041
ENSMUSG00000104109	0.241358	-1.98956	4.07899	-0.487758	0.625721	NA	ENSMUSG00000104109	NA	Gm30292	3	52789004	52797785	-1	lincRNA	predicted gene, 30292 [Source:MGI Symbol;Acc:MGI:5589451]	NA	NA	NA	ENSMUSG00000104109
ENSMUSG00000051985	0.438664	-1.98925	2.03867	-0.975761	0.329183	NA	ENSMUSG00000051985	226438	Igfn1	1	135953578	136006342	-1	protein_coding	immunoglobulin-like and fibronectin type III domain containing 1 [Source:MGI Symbol;Acc:MGI:3045352]	NA	NA	NA	ENSMUSG00000051985
ENSMUSG00000100334	0.418212	-1.98925	2.03153	-0.979187	0.327487	NA	ENSMUSG00000100334	NA	C230024C17Rik	1	153721240	153737829	-1	lincRNA	RIKEN cDNA C230024C17 gene [Source:MGI Symbol;Acc:MGI:5439413]	NA	NA	NA	ENSMUSG00000100334
ENSMUSG00000101214	0.341409	-1.98907	2.86866	-0.693378	0.488072	NA	ENSMUSG00000101214	NA	Gm28403	1	105382260	105569139	-1	sense_overlapping	predicted gene 28403 [Source:MGI Symbol;Acc:MGI:5579109]	NA	NA	NA	ENSMUSG00000101214
ENSMUSG00000088219	1.88929	-1.98747	1.31767	-1.50832	0.131472	1	ENSMUSG00000088219	NA	Gm22077	15	80080251	80080343	-1	snoRNA	predicted gene, 22077 [Source:MGI Symbol;Acc:MGI:5451854]	NA	NA	NA	ENSMUSG00000088219
ENSMUSG00000021566	0.37595	-1.98689	3.41515	-0.581788	0.560709	NA	ENSMUSG00000021566	NA	Slc6a19os	13	73699826	73709853	1	antisense_RNA	solute carrier family 6 (neurotransmitter transporter), member 19, opposite strand [Source:MGI Symbol;Acc:MGI:1918640]	NA	NA	NA	ENSMUSG00000021566
ENSMUSG00000076668	2.98279	-1.98658	1.08895	-1.82431	0.0681047	1	ENSMUSG00000076668	NA	Ighv7-4	12	114222788	114223328	-1	IG_V_gene	immunoglobulin heavy variable 7-4 [Source:MGI Symbol;Acc:MGI:4439763]	NA	NA	NA	ENSMUSG00000076668
ENSMUSG00000061742	2.14785	-1.98612	1.26825	-1.56603	0.117342	1	ENSMUSG00000061742	20521	Slc22a12	19	6535845	6543019	-1	protein_coding	solute carrier family 22 (organic anion/cation transporter), member 12 [Source:MGI Symbol;Acc:MGI:1195269]	NA	NA	NA	ENSMUSG00000061742
ENSMUSG00000064293	1.58831	-1.98564	1.45729	-1.36256	0.173021	1	ENSMUSG00000064293	269784	Cntn4	6	105677660	106699310	1	protein_coding	contactin 4 [Source:MGI Symbol;Acc:MGI:1095737]	NA	NA	NA	ENSMUSG00000064293
ENSMUSG00000109305	1.60724	-1.98474	1.41132	-1.4063	0.159636	1	ENSMUSG00000109305	NA	1810010D01Rik	7	145205825	145208119	-1	protein_coding	RIKEN cDNA 1810010D01 gene [Source:MGI Symbol;Acc:MGI:1916283]	NA	NA	NA	ENSMUSG00000109305
ENSMUSG00000008438	0.90076	-1.9839	1.39864	-1.41845	0.156059	NA	ENSMUSG00000008438	56622	Adam21	12	81558584	81568474	-1	protein_coding	a disintegrin and metallopeptidase domain 21 [Source:MGI Symbol;Acc:MGI:1861229]	metalloprotease(PC00153)	NA	NA	ENSMUSG00000008438
ENSMUSG00000093355	2.28963	-1.98302	1.24557	-1.59206	0.111372	1	ENSMUSG00000093355	NA	Snora26	5	74093530	74093650	1	snoRNA	small nucleolar RNA, H/ACA box 26 [Source:MGI Symbol;Acc:MGI:3819495]	NA	NA	NA	ENSMUSG00000093355
ENSMUSG00000055895	0.388592	-1.98274	2.8791	-0.688666	0.491033	NA	ENSMUSG00000055895	225922	Oosp2	19	11647279	11660559	-1	protein_coding	oocyte secreted protein 2 [Source:MGI Symbol;Acc:MGI:2684945]	NA	NA	NA	ENSMUSG00000055895
ENSMUSG00000057280	0.239684	-1.98251	4.06157	-0.488115	0.625468	NA	ENSMUSG00000057280	18198	Musk	4	58285960	58374303	1	protein_coding	muscle, skeletal, receptor tyrosine kinase [Source:MGI Symbol;Acc:MGI:103581]	NA	NA	NA	ENSMUSG00000057280
ENSMUSG00000028950	0.559171	-1.98071	1.80257	-1.09883	0.271844	NA	ENSMUSG00000028950	110326	Tas1r1	4	152027914	152038568	-1	protein_coding	taste receptor, type 1, member 1 [Source:MGI Symbol;Acc:MGI:1927505]	NA	NA	NA	ENSMUSG00000028950
ENSMUSG00000034777	0.237111	-1.97948	3.39147	-0.583665	0.559446	NA	ENSMUSG00000034777	24113	Vax2	6	83711264	83738313	1	protein_coding	ventral anterior homeobox 2 [Source:MGI Symbol;Acc:MGI:1346018]	DNA binding protein(PC00009)	homeodomain transcription factor(PC00119)	NA	ENSMUSG00000034777
ENSMUSG00000013611	0.394947	-1.97746	2.56074	-0.772221	0.439984	NA	ENSMUSG00000013611	66696	Snx31	15	36504062	36555573	-1	protein_coding	sorting nexin 31 [Source:MGI Symbol;Acc:MGI:1913946]	NA	NA	NA	ENSMUSG00000013611
ENSMUSG00000021872	0.687378	-1.9763	1.52915	-1.29241	0.196214	NA	ENSMUSG00000021872	75019	Rnase10	14	51007751	51010758	1	protein_coding	ribonuclease, RNase A family, 10 (non-active) [Source:MGI Symbol;Acc:MGI:1922269]	NA	NA	NA	ENSMUSG00000021872
ENSMUSG00000070794	0.370468	-1.9753	3.33946	-0.591502	0.554184	NA	ENSMUSG00000070794	NA	BC016548	2	103377643	103389044	-1	lincRNA	cDNA sequence BC016548 [Source:MGI Symbol;Acc:MGI:2448478]	NA	NA	NA	ENSMUSG00000070794
ENSMUSG00000111097	0.472758	-1.97299	2.61069	-0.755737	0.449807	NA	ENSMUSG00000111097	NA	AC154264.1	9	14259041	14263803	-1	lincRNA		NA	NA	NA	ENSMUSG00000111097
ENSMUSG00000074780	1.18674	-1.97212	1.88414	-1.04669	0.295241	1	ENSMUSG00000074780	NA	Anapc15-ps	10	95672991	95673451	-1	protein_coding	anaphase prompoting complex C subunit 15, pseudogene [Source:MGI Symbol;Acc:MGI:3646302]	NA	NA	NA	ENSMUSG00000074780
ENSMUSG00000066714	0.824708	-1.97033	1.48819	-1.32398	0.18551	NA	ENSMUSG00000066714	NA	Gm8062	13	73829932	73830375	1	processed_pseudogene	predicted pseudogene 8062 [Source:MGI Symbol;Acc:MGI:3643433]	NA	NA	NA	ENSMUSG00000066714
ENSMUSG00000115955	1.74529	-1.96682	1.16929	-1.68207	0.0925554	1	ENSMUSG00000115955	NA	NA	NA	NA	NA	NA	NA	NA	NA	NA	NA	ENSMUSG00000115955
ENSMUSG00000107605	0.351632	-1.96506	3.37527	-0.582193	0.560436	NA	ENSMUSG00000107605	NA	Gm44117	6	90459711	90461468	-1	lincRNA	predicted gene, 44117 [Source:MGI Symbol;Acc:MGI:5690509]	NA	NA	NA	ENSMUSG00000107605
ENSMUSG00000094628	1.07851	-1.96489	2.92921	-0.670793	0.502353	1	ENSMUSG00000094628	NA	Gm3252	14	4726775	4747493	1	protein_coding	predicted gene 3252 [Source:MGI Symbol;Acc:MGI:3781430]	NA	NA	NA	ENSMUSG00000094628
ENSMUSG00000115455	0.358856	-1.96162	2.21858	-0.884175	0.376602	NA	ENSMUSG00000115455	NA	NA	NA	NA	NA	NA	NA	NA	NA	NA	NA	ENSMUSG00000115455
ENSMUSG00000076891	0.793041	-1.96049	1.7479	-1.12162	0.262022	NA	ENSMUSG00000076891	NA	Traj39	14	54179962	54180024	1	TR_J_gene	T cell receptor alpha joining 39 [Source:MGI Symbol;Acc:MGI:4439593]	NA	NA	NA	ENSMUSG00000076891
ENSMUSG00000079103	0.434024	-1.95914	2.07064	-0.946154	0.34407	NA	ENSMUSG00000079103	NA	Tgm7	2	121093565	121109795	-1	protein_coding	transglutaminase 7 [Source:MGI Symbol;Acc:MGI:2151164]	acyltransferase(PC00042)	NA	NA	ENSMUSG00000079103
ENSMUSG00000016346	0.138979	-1.95488	5.49148	-0.355984	0.721852	NA	ENSMUSG00000016346	16536	Kcnq2	2	181075579	181135300	-1	protein_coding	potassium voltage-gated channel, subfamily Q, member 2 [Source:MGI Symbol;Acc:MGI:1309503]	NA	NA	NA	ENSMUSG00000016346
ENSMUSG00000068014	1.39768	-1.95466	5.49148	-0.355944	0.721882	1	ENSMUSG00000068014	NA	Gm14648	X	47900345	47900827	1	processed_pseudogene	predicted gene 14648 [Source:MGI Symbol;Acc:MGI:3705508]	NA	NA	NA	ENSMUSG00000068014
ENSMUSG00000104594	0.328984	-1.95317	2.88222	-0.677662	0.497986	NA	ENSMUSG00000104594	NA	Gm24022	12	113424724	113424783	-1	miRNA	predicted gene, 24022 [Source:MGI Symbol;Acc:MGI:5453799]	NA	NA	NA	ENSMUSG00000104594
ENSMUSG00000049571	1.45583	-1.9493	1.42128	-1.37151	0.170217	1	ENSMUSG00000049571	212124	Cfap46	7	139600951	139683817	-1	protein_coding	cilia and flagella associated protein 46 [Source:MGI Symbol;Acc:MGI:2444387]	NA	NA	NA	ENSMUSG00000049571
ENSMUSG00000098198	0.954861	-1.94877	1.91154	-1.01948	0.307976	1	ENSMUSG00000098198	NA	Gm9169	3	95144371	95144906	1	processed_pseudogene	predicted gene 9169 [Source:MGI Symbol;Acc:MGI:3648561]	NA	NA	NA	ENSMUSG00000098198
ENSMUSG00000022949	1.07553	-1.94708	3.07735	-0.632715	0.52692	1	ENSMUSG00000022949	209195	Clic6	16	92485736	92541243	1	protein_coding	chloride intracellular channel 6 [Source:MGI Symbol;Acc:MGI:2146607]	NA	NA	NA	ENSMUSG00000022949
ENSMUSG00000069456	2.81985	-1.94691	0.944064	-2.06226	0.0391829	1	ENSMUSG00000069456	19683	Rdh16	10	127801152	127846565	1	protein_coding	retinol dehydrogenase 16 [Source:MGI Symbol;Acc:MGI:1201375]	dehydrogenase(PC00092)	reductase(PC00198)	NA	ENSMUSG00000069456
ENSMUSG00000047661	1.11708	-1.94511	1.4932	-1.30264	0.192696	1	ENSMUSG00000047661	NA	1600012P17Rik	1	158967701	158980463	-1	lincRNA	RIKEN cDNA 1600012P17 gene [Source:MGI Symbol;Acc:MGI:1919275]	NA	NA	NA	ENSMUSG00000047661
ENSMUSG00000043383	0.1761	-1.94271	5.49187	-0.353743	0.723532	NA	ENSMUSG00000043383	258708	Olfr1342	4	118687486	118692756	-1	protein_coding	olfactory receptor 1342 [Source:MGI Symbol;Acc:MGI:3031176]	NA	NA	NA	ENSMUSG00000043383
ENSMUSG00000085006	0.176078	-1.94271	5.49187	-0.353743	0.723532	NA	ENSMUSG00000085006	NA	BC021767	3	94661830	94670696	-1	transcribed_unprocessed_pseudogene	cDNA sequence BC021767 [Source:MGI Symbol;Acc:MGI:3615512]	NA	NA	NA	ENSMUSG00000085006
ENSMUSG00000114053	1.14754	-1.93946	1.78923	-1.08396	0.278381	1	ENSMUSG00000114053	NA	AC133498.1	13	5539279	5724510	-1	lincRNA		NA	NA	NA	ENSMUSG00000114053
ENSMUSG00000028640	0.866298	-1.93906	1.38141	-1.40368	0.160414	NA	ENSMUSG00000028640	21420	Tfap2c	2	172549593	172558622	1	protein_coding	transcription factor AP-2, gamma [Source:MGI Symbol;Acc:MGI:106032]	transcription factor(PC00218)	NA	NA	ENSMUSG00000028640
ENSMUSG00000028139	2.42974	-1.93604	1.12172	-1.72597	0.0843534	1	ENSMUSG00000028139	66353	Riiad1	3	94464983	94480341	-1	protein_coding	regulatory subunit of type II PKA R-subunit (RIIa) domain containing 1 [Source:MGI Symbol;Acc:MGI:1913603]	NA	NA	NA	ENSMUSG00000028139
ENSMUSG00000042671	2.40066	-1.93542	1.05957	-1.82661	0.0677578	1	ENSMUSG00000042671	67792	Rgs8	1	153653025	153700323	1	protein_coding	regulator of G-protein signaling 8 [Source:MGI Symbol;Acc:MGI:108408]	G-protein modulator(PC00022)	NA	NA	ENSMUSG00000042671
ENSMUSG00000089822	0.441168	-1.9348	2.31237	-0.836716	0.402752	NA	ENSMUSG00000089822	NA	Gm15759	1	58254117	58315656	-1	antisense_RNA	predicted gene 15759 [Source:MGI Symbol;Acc:MGI:3783202]	NA	NA	NA	ENSMUSG00000089822
ENSMUSG00000087450	0.279957	-1.93372	2.94222	-0.657231	0.511033	NA	ENSMUSG00000087450	NA	Gm13994	2	124708655	124711083	1	lincRNA	predicted gene 13994 [Source:MGI Symbol;Acc:MGI:3651835]	NA	NA	NA	ENSMUSG00000087450
ENSMUSG00000087254	0.266025	-1.93342	2.9673	-0.651574	0.514676	NA	ENSMUSG00000087254	NA	2310005A03Rik	2	155097789	155100081	-1	lincRNA	RIKEN cDNA 2310005A03 gene [Source:MGI Symbol;Acc:MGI:1923981]	NA	NA	NA	ENSMUSG00000087254
ENSMUSG00000064513	3.57029	-1.93272	1.29656	-1.49066	0.136052	1	ENSMUSG00000064513	NA	Snora9	11	6528033	6528165	-1	snoRNA	small nucleolar RNA, H/ACA box 9 [Source:MGI Symbol;Acc:MGI:5452234]	NA	NA	NA	ENSMUSG00000064513
ENSMUSG00000116562	0.361594	-1.93222	4.87917	-0.396013	0.692095	NA	ENSMUSG00000116562	NA	NA	NA	NA	NA	NA	NA	NA	NA	NA	NA	ENSMUSG00000116562
ENSMUSG00000112669	0.168335	-1.93171	5.32841	-0.362531	0.716956	NA	ENSMUSG00000112669	NA	AC159542.1	10	94781974	94787161	-1	antisense_RNA		NA	NA	NA	ENSMUSG00000112669
ENSMUSG00000099092	0.108362	-1.93164	5.49222	-0.351705	0.725059	NA	ENSMUSG00000099092	NA	Mir7062	7	139986809	139986874	-1	miRNA	microRNA 7062 [Source:MGI Symbol;Acc:MGI:5530721]	NA	NA	NA	ENSMUSG00000099092
ENSMUSG00000098915	4.85584	-1.93102	1.38734	-1.39188	0.163957	1	ENSMUSG00000098915	NA	Rpl15-ps2	9	72060937	72061549	1	processed_pseudogene	ribosomal protein L15, pseudogene 2 [Source:MGI Symbol;Acc:MGI:3648255]	NA	NA	NA	ENSMUSG00000098915
ENSMUSG00000049926	0.108269	-1.93047	5.49226	-0.351489	0.725221	NA	ENSMUSG00000049926	258778	Olfr921	9	38773068	38779021	1	protein_coding	olfactory receptor 921 [Source:MGI Symbol;Acc:MGI:3030755]	NA	NA	NA	ENSMUSG00000049926
ENSMUSG00000100561	1.54631	-1.92986	1.22167	-1.57969	0.114178	1	ENSMUSG00000100561	NA	Gm7516	1	81797241	81797946	1	processed_pseudogene	predicted gene 7516 [Source:MGI Symbol;Acc:MGI:3643007]	NA	NA	NA	ENSMUSG00000100561
ENSMUSG00000064767	0.503408	-1.92823	2.92787	-0.658576	0.510168	NA	ENSMUSG00000064767	NA	Snord35b	7	45123025	45123111	-1	snoRNA	small nucleolar RNA, C/D box 35B [Source:MGI Symbol;Acc:MGI:1351321]	NA	NA	NA	ENSMUSG00000064767
ENSMUSG00000111685	0.689805	-1.92779	2.11852	-0.909972	0.362837	NA	ENSMUSG00000111685	NA	AC124577.4	9	44255047	44258293	1	TEC		NA	NA	NA	ENSMUSG00000111685
ENSMUSG00000103323	0.518481	-1.9264	1.96076	-0.98248	0.325864	NA	ENSMUSG00000103323	NA	Gm21631	3	11008850	11009603	-1	processed_pseudogene	predicted gene, 21631 [Source:MGI Symbol;Acc:MGI:5434986]	NA	NA	NA	ENSMUSG00000103323
ENSMUSG00000115252	0.377243	-1.92636	2.54631	-0.756532	0.44933	NA	ENSMUSG00000115252	NA	NA	NA	NA	NA	NA	NA	NA	NA	NA	NA	ENSMUSG00000115252
ENSMUSG00000085862	0.406786	-1.92526	3.92734	-0.490219	0.623979	NA	ENSMUSG00000085862	NA	Gm13483	2	50296810	50433967	1	processed_transcript	predicted gene 13483 [Source:MGI Symbol;Acc:MGI:3651423]	NA	NA	NA	ENSMUSG00000085862
ENSMUSG00000103933	2.27225	-1.92481	1.20012	-1.60385	0.108748	1	ENSMUSG00000103933	NA	Gm36964	1	8815842	8816039	1	processed_pseudogene	predicted gene, 36964 [Source:MGI Symbol;Acc:MGI:5610192]	NA	NA	NA	ENSMUSG00000103933
ENSMUSG00000044125	0.107796	-1.92441	5.49246	-0.350374	0.726058	NA	ENSMUSG00000044125	NA	9530080O11Rik	4	95959715	95967655	-1	processed_transcript	RIKEN cDNA 9530080O11 gene [Source:MGI Symbol;Acc:MGI:2441751]	NA	NA	NA	ENSMUSG00000044125
ENSMUSG00000100254	10.2687	-1.924	3.15491	-0.609844	0.541965	1	ENSMUSG00000100254	22064	Trpc2	7	102083116	102096396	1	protein_coding	transient receptor potential cation channel, subfamily C, member 2 [Source:MGI Symbol;Acc:MGI:109527]	ion channel(PC00133)	NA	NA	ENSMUSG00000100254
ENSMUSG00000082317	0.840784	-1.92371	1.60016	-1.2022	0.229285	NA	ENSMUSG00000082317	NA	Gm14933	X	96358704	96359681	-1	processed_pseudogene	predicted gene 14933 [Source:MGI Symbol;Acc:MGI:3802039]	NA	NA	NA	ENSMUSG00000082317
ENSMUSG00000093473	0.231002	-1.9236	3.4992	-0.549725	0.582508	NA	ENSMUSG00000093473	NA	Gm20620	9	58695844	58696011	-1	processed_pseudogene	predicted gene 20620 [Source:MGI Symbol;Acc:MGI:5313067]	NA	NA	NA	ENSMUSG00000093473
ENSMUSG00000028172	0.591825	-1.9236	1.51526	-1.26948	0.20427	NA	ENSMUSG00000028172	21338	Tacr3	3	134829007	134934579	1	protein_coding	tachykinin receptor 3 [Source:MGI Symbol;Acc:MGI:892968]	NA	NA	NA	ENSMUSG00000028172
ENSMUSG00000111514	0.445155	-1.92155	1.95236	-0.98422	0.325007	NA	ENSMUSG00000111514	NA	AC150314.3	10	84518045	84523270	1	lincRNA		NA	NA	NA	ENSMUSG00000111514
ENSMUSG00000062782	0.107453	-1.92	5.4926	-0.349562	0.726668	NA	ENSMUSG00000062782	257939	Olfr527	7	140334017	140338551	1	protein_coding	olfactory receptor 527 [Source:MGI Symbol;Acc:MGI:3030361]	NA	NA	NA	ENSMUSG00000062782
ENSMUSG00000113241	0.107453	-1.92	5.4926	-0.349562	0.726668	NA	ENSMUSG00000113241	NA	CT010465.2	13	7139127	7175925	-1	lincRNA		NA	NA	NA	ENSMUSG00000113241
ENSMUSG00000053161	0.137104	-1.91902	5.49263	-0.349382	0.726803	NA	ENSMUSG00000053161	71227	Daw1	1	83159752	83210574	1	protein_coding	dynein assembly factor with WDR repeat domains 1 [Source:MGI Symbol;Acc:MGI:1923089]	NA	NA	NA	ENSMUSG00000053161
ENSMUSG00000082983	0.241638	-1.91891	4.13792	-0.463738	0.642835	NA	ENSMUSG00000082983	NA	Gm12318	11	70762107	70762379	-1	processed_pseudogene	predicted gene 12318 [Source:MGI Symbol;Acc:MGI:3649449]	NA	NA	NA	ENSMUSG00000082983
ENSMUSG00000107079	0.199028	-1.91852	3.54162	-0.541708	0.58802	NA	ENSMUSG00000107079	NA	Gm35648	5	147868074	147868548	-1	processed_pseudogene	predicted gene, 35648 [Source:MGI Symbol;Acc:MGI:5594807]	NA	NA	NA	ENSMUSG00000107079
ENSMUSG00000102140	0.199959	-1.91852	3.53889	-0.542125	0.587732	NA	ENSMUSG00000102140	NA	Gm38058	1	64736240	64740607	1	TEC	predicted gene, 38058 [Source:MGI Symbol;Acc:MGI:5611286]	NA	NA	NA	ENSMUSG00000102140
ENSMUSG00000091119	0.138878	-1.91843	5.49265	-0.349272	0.726885	NA	ENSMUSG00000091119	100039139	Ccdc152	15	3280627	3303526	-1	protein_coding	coiled-coil domain containing 152 [Source:MGI Symbol;Acc:MGI:3641617]	NA	NA	NA	ENSMUSG00000091119
ENSMUSG00000065529	0.232991	-1.91841	5.49265	-0.349268	0.726888	NA	ENSMUSG00000065529	NA	Mir22	11	75463716	75463810	1	miRNA	microRNA 22 [Source:MGI Symbol;Acc:MGI:2676896]	NA	NA	NA	ENSMUSG00000065529
ENSMUSG00000082377	0.256948	-1.91829	5.49265	-0.349246	0.726904	NA	ENSMUSG00000082377	NA	Gm14415	2	177103564	177106488	-1	unprocessed_pseudogene	predicted gene 14415 [Source:MGI Symbol;Acc:MGI:3652252]	NA	NA	NA	ENSMUSG00000082377
ENSMUSG00000085336	0.206225	-1.91823	5.15068	-0.372422	0.709578	NA	ENSMUSG00000085336	NA	Gm11732	11	117426178	117438866	1	processed_transcript	predicted gene 11732 [Source:MGI Symbol;Acc:MGI:3652087]	NA	NA	NA	ENSMUSG00000085336
ENSMUSG00000028023	0.694555	-1.91649	1.85775	-1.03162	0.30225	NA	ENSMUSG00000028023	18741	Pitx2	3	129199878	129219591	1	protein_coding	paired-like homeodomain transcription factor 2 [Source:MGI Symbol;Acc:MGI:109340]	NA	NA	NA	ENSMUSG00000028023
ENSMUSG00000096140	1.1435	-1.91537	1.24447	-1.53911	0.123777	1	ENSMUSG00000096140	100043332	Ankrd66	17	43534174	43543639	-1	protein_coding	ankyrin repeat domain 66 [Source:MGI Symbol;Acc:MGI:1925106]	NA	NA	NA	ENSMUSG00000096140
ENSMUSG00000117176	0.950501	-1.91508	1.59887	-1.19777	0.231006	1	ENSMUSG00000117176	NA	NA	NA	NA	NA	NA	NA	NA	NA	NA	NA	ENSMUSG00000117176
ENSMUSG00000083270	0.595759	-1.91505	1.57941	-1.21251	0.225315	NA	ENSMUSG00000083270	NA	Gm13498	2	50909684	50911849	1	processed_pseudogene	predicted gene 13498 [Source:MGI Symbol;Acc:MGI:3650381]	NA	NA	NA	ENSMUSG00000083270
ENSMUSG00000113311	0.564836	-1.91469	2.09392	-0.914408	0.360503	NA	ENSMUSG00000113311	NA	CT009486.1	13	74404183	74406737	-1	antisense_RNA		NA	NA	NA	ENSMUSG00000113311
ENSMUSG00000101129	0.739033	-1.91403	1.5422	-1.2411	0.214567	NA	ENSMUSG00000101129	NA	Gm5254	1	57291425	57292401	-1	processed_pseudogene	predicted gene 5254 [Source:MGI Symbol;Acc:MGI:3645015]	NA	NA	NA	ENSMUSG00000101129
ENSMUSG00000089014	0.484602	-1.91389	1.96927	-0.971877	0.331112	NA	ENSMUSG00000089014	NA	Gm25520	X	75101409	75101526	1	snoRNA	predicted gene, 25520 [Source:MGI Symbol;Acc:MGI:5455297]	NA	NA	NA	ENSMUSG00000089014
ENSMUSG00000110065	0.732902	-1.91325	1.52265	-1.25652	0.208926	NA	ENSMUSG00000110065	NA	Gm45588	7	111857926	111858555	-1	processed_pseudogene	predicted gene 45588 [Source:MGI Symbol;Acc:MGI:5791424]	NA	NA	NA	ENSMUSG00000110065
ENSMUSG00000108356	0.169752	-1.9131	4.32316	-0.442524	0.65811	NA	ENSMUSG00000108356	NA	9130221F21Rik	6	72013896	72042528	-1	lincRNA	RIKEN cDNA 9130221F21 gene [Source:MGI Symbol;Acc:MGI:4840488]	NA	NA	NA	ENSMUSG00000108356
ENSMUSG00000000216	0.106904	-1.91293	5.49283	-0.34826	0.727645	NA	ENSMUSG00000000216	20278	Scnn1g	7	121734479	121768475	1	protein_coding	sodium channel, nonvoltage-gated 1 gamma [Source:MGI Symbol;Acc:MGI:104695]	ion channel(PC00133)	NA	NA	ENSMUSG00000000216
ENSMUSG00000104632	0.573319	-1.91274	1.8656	-1.02527	0.305235	NA	ENSMUSG00000104632	NA	Gm42909	5	12554632	12558250	1	TEC	predicted gene 42909 [Source:MGI Symbol;Acc:MGI:5663046]	NA	NA	NA	ENSMUSG00000104632
ENSMUSG00000105600	0.388392	-1.9127	2.97542	-0.642832	0.520333	NA	ENSMUSG00000105600	NA	Gm5987	5	106215651	106216801	1	processed_pseudogene	predicted gene 5987 [Source:MGI Symbol;Acc:MGI:3644525]	NA	NA	NA	ENSMUSG00000105600
ENSMUSG00000101024	0.240153	-1.91227	3.47426	-0.55041	0.582038	NA	ENSMUSG00000101024	NA	Gm5692	19	11403948	11405004	-1	processed_pseudogene	predicted gene 5692 [Source:MGI Symbol;Acc:MGI:3646968]	NA	NA	NA	ENSMUSG00000101024
ENSMUSG00000113903	0.234962	-1.91223	2.97268	-0.643267	0.520051	NA	ENSMUSG00000113903	NA	CT485612.11	12	88359357	88360257	-1	processed_pseudogene		NA	NA	NA	ENSMUSG00000113903
ENSMUSG00000102380	1.44682	-1.91163	1.06921	-1.78789	0.0737935	1	ENSMUSG00000102380	NA	Gm38140	1	134096405	134099159	-1	TEC	predicted gene, 38140 [Source:MGI Symbol;Acc:MGI:5611368]	NA	NA	NA	ENSMUSG00000102380
ENSMUSG00000113391	0.30172	-1.91083	2.57389	-0.742389	0.457852	NA	ENSMUSG00000113391	NA	AC132433.1	13	8797302	8798402	-1	TEC		NA	NA	NA	ENSMUSG00000113391
ENSMUSG00000114566	0.388484	-1.91079	2.10152	-0.909239	0.363224	NA	ENSMUSG00000114566	NA	AC123619.2	13	60463586	60481298	-1	lincRNA		NA	NA	NA	ENSMUSG00000114566
ENSMUSG00000076619	0.401614	-1.91047	2.26942	-0.841833	0.399881	NA	ENSMUSG00000076619	NA	Ighj3	12	113429085	113429132	-1	IG_J_gene	immunoglobulin heavy joining 3 [Source:MGI Symbol;Acc:MGI:4439767]	NA	NA	NA	ENSMUSG00000076619
ENSMUSG00000115375	0.407875	-1.90961	1.92791	-0.990503	0.321928	NA	ENSMUSG00000115375	NA	NA	NA	NA	NA	NA	NA	NA	NA	NA	NA	ENSMUSG00000115375
ENSMUSG00000080006	0.706319	-1.90837	1.69234	-1.12765	0.259468	NA	ENSMUSG00000080006	NA	Rps19-ps7	2	140073032	140073469	-1	processed_pseudogene	ribosomal protein S19, pseudogene 7 [Source:MGI Symbol;Acc:MGI:3652235]	NA	NA	NA	ENSMUSG00000080006
ENSMUSG00000103232	0.199475	-1.90728	4.23605	-0.45025	0.65253	NA	ENSMUSG00000103232	NA	Gm37160	2	13238939	13240627	-1	TEC	predicted gene, 37160 [Source:MGI Symbol;Acc:MGI:5610388]	NA	NA	NA	ENSMUSG00000103232
ENSMUSG00000099579	0.268642	-1.9069	2.95514	-0.645281	0.518745	NA	ENSMUSG00000099579	NA	1700120K04Rik	7	127603900	127604445	-1	antisense_RNA	RIKEN cDNA 1700120K04 gene [Source:MGI Symbol;Acc:MGI:1915482]	NA	NA	NA	ENSMUSG00000099579
ENSMUSG00000105729	0.142979	-1.90665	5.49303	-0.347104	0.728514	NA	ENSMUSG00000105729	NA	5330425B07Rik	3	116148110	116149136	1	TEC	RIKEN cDNA 5330425B07 gene [Source:MGI Symbol;Acc:MGI:1924313]	NA	NA	NA	ENSMUSG00000105729
ENSMUSG00000109135	0.858582	-1.90659	1.31125	-1.45403	0.145939	NA	ENSMUSG00000109135	NA	Gm6240	7	88781926	88782398	-1	processed_pseudogene	predicted gene 6240 [Source:MGI Symbol;Acc:MGI:3648708]	NA	NA	NA	ENSMUSG00000109135
ENSMUSG00000082068	0.165981	-1.90653	5.34016	-0.357017	0.721079	NA	ENSMUSG00000082068	NA	Gm2673	5	92363904	92365511	1	processed_pseudogene	predicted gene 2673 [Source:MGI Symbol;Acc:MGI:3780842]	NA	NA	NA	ENSMUSG00000082068
ENSMUSG00000111094	0.226945	-1.9065	5.08967	-0.374582	0.707972	NA	ENSMUSG00000111094	NA	AC145731.1	9	120869160	120873860	1	lincRNA		NA	NA	NA	ENSMUSG00000111094
ENSMUSG00000048592	0.292649	-1.90612	2.56395	-0.743429	0.457222	NA	ENSMUSG00000048592	NA	Gm5946	X	150220716	150226021	-1	transcribed_processed_pseudogene	predicted gene 5946 [Source:MGI Symbol;Acc:MGI:3644989]	NA	NA	NA	ENSMUSG00000048592
ENSMUSG00000030873	0.106375	-1.9061	5.49305	-0.347002	0.72859	NA	ENSMUSG00000030873	20277	Scnn1b	7	121865038	121918514	1	protein_coding	sodium channel, nonvoltage-gated 1 beta [Source:MGI Symbol;Acc:MGI:104696]	ion channel(PC00133)	NA	NA	ENSMUSG00000030873
ENSMUSG00000054662	0.106375	-1.9061	5.49305	-0.347002	0.72859	NA	ENSMUSG00000054662	71345	Ano9	7	141101212	141117806	-1	protein_coding	anoctamin 9 [Source:MGI Symbol;Acc:MGI:1918595]	NA	NA	NA	ENSMUSG00000054662
ENSMUSG00000086981	0.106375	-1.9061	5.49305	-0.347002	0.72859	NA	ENSMUSG00000086981	NA	Gm12171	11	46544209	46557067	1	lincRNA	predicted gene 12171 [Source:MGI Symbol;Acc:MGI:3649516]	NA	NA	NA	ENSMUSG00000086981
ENSMUSG00000089804	0.106375	-1.9061	5.49305	-0.347002	0.72859	NA	ENSMUSG00000089804	NA	Gm16136	15	37231921	37233309	-1	antisense_RNA	predicted gene 16136 [Source:MGI Symbol;Acc:MGI:3802137]	NA	NA	NA	ENSMUSG00000089804
ENSMUSG00000025481	0.163378	-1.90608	5.49305	-0.346999	0.728592	NA	ENSMUSG00000025481	76974	Urah	7	140835018	140837966	1	protein_coding	urate (5-hydroxyiso-) hydrolase [Source:MGI Symbol;Acc:MGI:1916142]	transfer/carrier protein(PC00219)	transporter(PC00227)	NA	ENSMUSG00000025481
ENSMUSG00000103770	0.166957	-1.90608	5.49305	-0.346999	0.728592	NA	ENSMUSG00000103770	192161	Pcdha9	18	36997880	37187657	1	protein_coding	protocadherin alpha 9 [Source:MGI Symbol;Acc:MGI:2447322]	NA	NA	NA	ENSMUSG00000103770
ENSMUSG00000037432	0.223959	-1.90607	5.49305	-0.346996	0.728594	NA	ENSMUSG00000037432	100534273	Fer1l5	1	36372291	36422110	1	protein_coding	fer-1-like 5 (C. elegans) [Source:MGI Symbol;Acc:MGI:3616091]	membrane traffic protein(PC00150)	NA	NA	ENSMUSG00000037432
ENSMUSG00000113693	0.281865	-1.90606	5.49305	-0.346994	0.728596	NA	ENSMUSG00000113693	NA	AC174776.2	12	55152450	55152854	1	processed_pseudogene		NA	NA	NA	ENSMUSG00000113693
ENSMUSG00000074903	1.52481	-1.90594	5.49305	-0.346973	0.728612	1	ENSMUSG00000074903	NA	Gm2058	7	39588931	39589717	1	processed_pseudogene	predicted gene 2058 [Source:MGI Symbol;Acc:MGI:3805010]	NA	NA	NA	ENSMUSG00000074903
ENSMUSG00000023073	0.600526	-1.90445	1.66457	-1.14411	0.252579	NA	ENSMUSG00000023073	20494	Slc10a2	8	5083219	5105351	-1	protein_coding	solute carrier family 10, member 2 [Source:MGI Symbol;Acc:MGI:1201406]	cation transporter(PC00068)	NA	NA	ENSMUSG00000023073
ENSMUSG00000093804	1.09477	-1.90399	1.22968	-1.54836	0.121536	1	ENSMUSG00000093804	258397	Olfr1303	2	111812247	111820340	-1	protein_coding	olfactory receptor 1303 [Source:MGI Symbol;Acc:MGI:3031137]	NA	NA	NA	ENSMUSG00000093804
ENSMUSG00000094320	0.422512	-1.90183	2.36249	-0.805013	0.420812	NA	ENSMUSG00000094320	NA	Chchd2-ps	4	148068031	148068492	-1	processed_pseudogene	coiled-coil-helix-coiled-coil-helix domain containing 2, pseudogene [Source:MGI Symbol;Acc:MGI:3649942]	NA	NA	NA	ENSMUSG00000094320
ENSMUSG00000081093	0.234928	-1.90113	3.48479	-0.545551	0.585375	NA	ENSMUSG00000081093	NA	Gm12565	3	37599424	37600072	-1	processed_pseudogene	predicted gene 12565 [Source:MGI Symbol;Acc:MGI:3652206]	NA	NA	NA	ENSMUSG00000081093
ENSMUSG00000080938	0.565859	-1.90111	1.68943	-1.1253	0.260464	NA	ENSMUSG00000080938	NA	Gm6062	X	70978281	70978911	1	processed_pseudogene	predicted gene 6062 [Source:MGI Symbol;Acc:MGI:3645240]	NA	NA	NA	ENSMUSG00000080938
ENSMUSG00000086063	0.236546	-1.901	3.48091	-0.546122	0.584982	NA	ENSMUSG00000086063	NA	Gm12257	11	58904402	58906170	1	antisense_RNA	predicted gene 12257 [Source:MGI Symbol;Acc:MGI:3651532]	NA	NA	NA	ENSMUSG00000086063
ENSMUSG00000083900	0.136652	-1.90083	5.49323	-0.346031	0.729319	NA	ENSMUSG00000083900	NA	Gm13294	2	11098933	11100262	-1	processed_pseudogene	predicted gene 13294 [Source:MGI Symbol;Acc:MGI:3649472]	NA	NA	NA	ENSMUSG00000083900
ENSMUSG00000086924	0.164989	-1.90027	5.49324	-0.345929	0.729396	NA	ENSMUSG00000086924	NA	Gm11766	11	119938511	119942074	1	lincRNA	predicted gene 11766 [Source:MGI Symbol;Acc:MGI:3650673]	NA	NA	NA	ENSMUSG00000086924
ENSMUSG00000087691	1.0986	-1.89907	1.10136	-1.7243	0.0846537	1	ENSMUSG00000087691	NA	Gm15674	1	130422824	130437914	1	antisense_RNA	predicted gene 15674 [Source:MGI Symbol;Acc:MGI:3783116]	NA	NA	NA	ENSMUSG00000087691
ENSMUSG00000047565	0.478186	-1.89793	1.68798	-1.12438	0.26085	NA	ENSMUSG00000047565	64833	Acot10	15	20665219	20666750	-1	protein_coding	acyl-CoA thioesterase 10 [Source:MGI Symbol;Acc:MGI:1928940]	esterase(PC00097)	NA	NA	ENSMUSG00000047565
ENSMUSG00000104496	1.40552	-1.89782	1.87103	-1.01432	0.310432	1	ENSMUSG00000104496	NA	Gm5837	1	139928240	139929608	-1	processed_pseudogene	predicted gene 5837 [Source:MGI Symbol;Acc:MGI:3648028]	NA	NA	NA	ENSMUSG00000104496
ENSMUSG00000085260	1.38407	-1.89779	1.79923	-1.05478	0.291526	1	ENSMUSG00000085260	NA	Med9os	11	59946889	59948142	-1	antisense_RNA	mediator complex subunit 9, opposite strand [Source:MGI Symbol;Acc:MGI:1916628]	NA	NA	NA	ENSMUSG00000085260
ENSMUSG00000111333	0.715893	-1.89675	1.5032	-1.26181	0.207016	NA	ENSMUSG00000111333	NA	AC125206.3	10	42886892	42887465	1	processed_pseudogene		NA	NA	NA	ENSMUSG00000111333
ENSMUSG00000031893	1.57518	-1.89646	2.16639	-0.875402	0.381355	1	ENSMUSG00000031893	72236	Tsnaxip1	8	105827731	105844680	1	protein_coding	translin-associated factor X (Tsnax) interacting protein 1 [Source:MGI Symbol;Acc:MGI:1919486]	NA	NA	NA	ENSMUSG00000031893
ENSMUSG00000096921	0.301208	-1.89635	2.26549	-0.837063	0.402557	NA	ENSMUSG00000096921	NA	Gm26822	16	10827927	10833507	1	lincRNA	predicted gene, 26822 [Source:MGI Symbol;Acc:MGI:5477316]	NA	NA	NA	ENSMUSG00000096921
ENSMUSG00000105801	0.258682	-1.89594	2.57624	-0.735934	0.461771	NA	ENSMUSG00000105801	NA	C430019N01Rik	5	97999384	98000950	-1	TEC	RIKEN cDNA C430019N01 gene [Source:MGI Symbol;Acc:MGI:3028058]	NA	NA	NA	ENSMUSG00000105801
ENSMUSG00000097970	0.162932	-1.89556	4.35308	-0.435453	0.663234	NA	ENSMUSG00000097970	NA	Gm27028	1	23291537	23291935	1	lincRNA	predicted gene, 27028 [Source:MGI Symbol;Acc:MGI:5504143]	NA	NA	NA	ENSMUSG00000097970
ENSMUSG00000084125	0.481394	-1.89539	1.62197	-1.16857	0.242578	NA	ENSMUSG00000084125	NA	Gm8757	X	78624706	78625077	1	processed_pseudogene	predicted gene 8757 [Source:MGI Symbol;Acc:MGI:3644342]	NA	NA	NA	ENSMUSG00000084125
ENSMUSG00000112336	0.2045	-1.89529	3.52192	-0.538142	0.590479	NA	ENSMUSG00000112336	NA	CT030161.2	12	80259443	80260557	1	antisense_RNA		NA	NA	NA	ENSMUSG00000112336
ENSMUSG00000082619	0.200235	-1.89502	5.17733	-0.366022	0.714349	NA	ENSMUSG00000082619	NA	Gm16219	10	75969898	75970171	1	processed_pseudogene	predicted gene 16219 [Source:MGI Symbol;Acc:MGI:3802165]	NA	NA	NA	ENSMUSG00000082619
ENSMUSG00000104485	0.622791	-1.89478	1.6863	-1.12363	0.261169	NA	ENSMUSG00000104485	NA	Gm38065	7	143350421	143353912	-1	TEC	predicted gene, 38065 [Source:MGI Symbol;Acc:MGI:5611293]	NA	NA	NA	ENSMUSG00000104485
ENSMUSG00000044737	0.105503	-1.89466	5.49343	-0.344897	0.730172	NA	ENSMUSG00000044737	317653	Klk14	7	43690418	43695536	1	protein_coding	kallikrein related-peptidase 14 [Source:MGI Symbol;Acc:MGI:2447564]	serine protease(PC00203)	NA	NA	ENSMUSG00000044737
ENSMUSG00000022523	2.13005	-1.89461	1.14809	-1.65023	0.0988956	1	ENSMUSG00000022523	14167	Fgf12	16	28160120	28445227	-1	protein_coding	fibroblast growth factor 12 [Source:MGI Symbol;Acc:MGI:109183]	growth factor(PC00112)	NA	NA	ENSMUSG00000022523
ENSMUSG00000082330	0.488169	-1.89372	1.82453	-1.03792	0.299306	NA	ENSMUSG00000082330	NA	Ldha-ps	2	60134055	60135049	1	processed_pseudogene	lactate dehydrogenase A, pseudogene [Source:MGI Symbol;Acc:MGI:96760]	NA	NA	NA	ENSMUSG00000082330
ENSMUSG00000041062	0.428281	-1.89341	1.93108	-0.980489	0.326845	NA	ENSMUSG00000041062	328783	Mslnl	17	25736040	25748330	1	protein_coding	mesothelin-like [Source:MGI Symbol;Acc:MGI:3607710]	extracellular matrix glycoprotein(PC00100)	NA	NA	ENSMUSG00000041062
ENSMUSG00000064871	0.768231	-1.89333	1.5711	-1.2051	0.228166	NA	ENSMUSG00000064871	NA	Snord58b	18	75001058	75001123	1	snoRNA	small nucleolar RNA, C/D box 58B [Source:MGI Symbol;Acc:MGI:3819545]	NA	NA	NA	ENSMUSG00000064871
ENSMUSG00000091402	8.79144	-1.89113	1.45872	-1.29644	0.194825	1	ENSMUSG00000091402	217874	Rd3l	12	111979111	111981317	-1	protein_coding	retinal degeneration 3-like [Source:MGI Symbol;Acc:MGI:2675860]	NA	NA	NA	ENSMUSG00000091402
ENSMUSG00000109712	0.226563	-1.89047	3.50353	-0.53959	0.58948	NA	ENSMUSG00000109712	NA	Gm8667	7	104222333	104222781	-1	processed_pseudogene	predicted gene 8667 [Source:MGI Symbol;Acc:MGI:3648748]	NA	NA	NA	ENSMUSG00000109712
ENSMUSG00000089733	0.137258	-1.88961	5.4936	-0.343967	0.730871	NA	ENSMUSG00000089733	NA	Gm15628	14	75136270	75136912	-1	lincRNA	predicted gene 15628 [Source:MGI Symbol;Acc:MGI:3783072]	NA	NA	NA	ENSMUSG00000089733
ENSMUSG00000083090	0.355344	-1.88936	1.8963	-0.996341	0.319084	NA	ENSMUSG00000083090	NA	Gm11736	11	113756702	113757206	1	processed_pseudogene	predicted gene 11736 [Source:MGI Symbol;Acc:MGI:3650061]	NA	NA	NA	ENSMUSG00000083090
ENSMUSG00000081376	0.595454	-1.88934	1.93909	-0.974348	0.329884	NA	ENSMUSG00000081376	NA	Gm11694	11	115493024	115493182	1	processed_pseudogene	predicted gene 11694 [Source:MGI Symbol;Acc:MGI:3650243]	NA	NA	NA	ENSMUSG00000081376
ENSMUSG00000036938	0.105076	-1.88907	5.49361	-0.343867	0.730946	NA	ENSMUSG00000036938	103964	Try5	6	41311233	41316841	-1	protein_coding	trypsin 5 [Source:MGI Symbol;Acc:MGI:102756]	serine protease(PC00203)	NA	NA	ENSMUSG00000036938
ENSMUSG00000039358	0.105076	-1.88907	5.49361	-0.343867	0.730946	NA	ENSMUSG00000039358	13492	Drd5	5	38319367	38322518	1	protein_coding	dopamine receptor D5 [Source:MGI Symbol;Acc:MGI:94927]	G-protein coupled receptor(PC00021)	NA	NA	ENSMUSG00000039358
ENSMUSG00000029369	0.200759	-1.88892	4.22847	-0.446714	0.655082	NA	ENSMUSG00000029369	280662	Afm	5	90518932	90553543	1	protein_coding	afamin [Source:MGI Symbol;Acc:MGI:2429409]	transfer/carrier protein(PC00219)	NA	NA	ENSMUSG00000029369
ENSMUSG00000076778	0.695981	-1.88812	2.43376	-0.775805	0.437864	NA	ENSMUSG00000076778	NA	Trav13d-1	14	52851290	52851866	1	TR_V_gene	T cell receptor alpha variable 13D-1 [Source:MGI Symbol;Acc:MGI:3652171]	NA	NA	NA	ENSMUSG00000076778
ENSMUSG00000019856	11.0114	-1.88642	1.1356	-1.66117	NA	NA	ENSMUSG00000019856	75906	Fam184a	10	53633145	53751123	-1	protein_coding	family with sequence similarity 184, member A [Source:MGI Symbol;Acc:MGI:1923156]	NA	NA	NA	ENSMUSG00000019856
ENSMUSG00000096038	0.683211	-1.88594	2.12233	-0.88862	0.374207	NA	ENSMUSG00000096038	NA	Trav13n-3	14	53337122	53337639	1	TR_V_gene	T cell receptor alpha variable 13N-3 [Source:MGI Symbol;Acc:MGI:3645598]	NA	NA	NA	ENSMUSG00000096038
ENSMUSG00000114820	0.492933	-1.88578	1.63981	-1.15	0.250143	NA	ENSMUSG00000114820	NA	AC091783.4	14	56275793	56276948	1	processed_pseudogene		NA	NA	NA	ENSMUSG00000114820
ENSMUSG00000085711	0.745087	-1.88572	3.10713	-0.606901	0.543917	NA	ENSMUSG00000085711	NA	Gm15163	X	157016229	157017530	-1	processed_pseudogene	predicted gene 15163 [Source:MGI Symbol;Acc:MGI:3642430]	NA	NA	NA	ENSMUSG00000085711
ENSMUSG00000110767	0.505658	-1.8851	3.78199	-0.49844	0.618174	NA	ENSMUSG00000110767	NA	AC134859.1	9	46532757	46543376	1	lincRNA		NA	NA	NA	ENSMUSG00000110767
ENSMUSG00000099850	0.435923	-1.88396	3.00571	-0.626794	0.530794	NA	ENSMUSG00000099850	NA	Gm28906	1	45833800	45836788	-1	processed_pseudogene	predicted gene 28906 [Source:MGI Symbol;Acc:MGI:5579612]	NA	NA	NA	ENSMUSG00000099850
ENSMUSG00000031179	0.104668	-1.88378	5.49379	-0.342892	0.731679	NA	ENSMUSG00000031179	70696	3830417A13Rik	X	64173548	64178778	1	protein_coding	RIKEN cDNA 3830417A13 gene [Source:MGI Symbol;Acc:MGI:1917946]	cell adhesion molecule(PC00069)	NA	NA	ENSMUSG00000031179
ENSMUSG00000044912	0.104668	-1.88378	5.49379	-0.342892	0.731679	NA	ENSMUSG00000044912	238266	Syt16	12	73997661	74273267	1	protein_coding	synaptotagmin XVI [Source:MGI Symbol;Acc:MGI:2673872]	NA	NA	NA	ENSMUSG00000044912
ENSMUSG00000112683	0.104668	-1.88378	5.49379	-0.342892	0.731679	NA	ENSMUSG00000112683	NA	AC160060.3	10	119090342	119090848	1	processed_pseudogene		NA	NA	NA	ENSMUSG00000112683
ENSMUSG00000055298	0.201835	-1.88375	5.49379	-0.342887	0.731683	NA	ENSMUSG00000055298	26898	Ctsj	13	61000179	61005959	-1	protein_coding	cathepsin J [Source:MGI Symbol;Acc:MGI:1349426]	cysteine protease(PC00081)	protease inhibitor(PC00191)	NA	ENSMUSG00000055298
ENSMUSG00000085747	0.170668	-1.88343	4.31444	-0.436541	0.662445	NA	ENSMUSG00000085747	NA	Slc13a2os	11	78394485	78405657	1	antisense_RNA	solute carrier family 13 (sodium-dependent dicarboxylate transporter), member 2, opposite strand [Source:MGI Symbol;Acc:MGI:3649278]	NA	NA	NA	ENSMUSG00000085747
ENSMUSG00000104237	0.169897	-1.88343	4.31801	-0.436179	0.662707	NA	ENSMUSG00000104237	NA	Gm33533	1	36739048	36744792	-1	lincRNA	predicted gene, 33533 [Source:MGI Symbol;Acc:MGI:5592692]	NA	NA	NA	ENSMUSG00000104237
ENSMUSG00000102837	0.413288	-1.88331	2.0949	-0.898997	0.368654	NA	ENSMUSG00000102837	NA	Gm37383	1	155881802	155882546	-1	TEC	predicted gene, 37383 [Source:MGI Symbol;Acc:MGI:5610611]	NA	NA	NA	ENSMUSG00000102837
ENSMUSG00000105245	0.454673	-1.88276	1.80345	-1.04398	0.296496	NA	ENSMUSG00000105245	NA	Gm31305	3	97730339	97736166	1	antisense_RNA	predicted gene, 31305 [Source:MGI Symbol;Acc:MGI:5590464]	NA	NA	NA	ENSMUSG00000105245
ENSMUSG00000102293	0.261945	-1.88244	4.13533	-0.455208	0.648959	NA	ENSMUSG00000102293	NA	Gm37541	1	86874350	86876664	1	TEC	predicted gene, 37541 [Source:MGI Symbol;Acc:MGI:5610769]	NA	NA	NA	ENSMUSG00000102293
ENSMUSG00000027446	0.192346	-1.88223	5.49384	-0.342608	0.731893	NA	ENSMUSG00000027446	77705	9230104L09Rik	2	148846711	148865038	-1	protein_coding	RIKEN cDNA 9230104L09 gene [Source:MGI Symbol;Acc:MGI:1924955]	NA	NA	NA	ENSMUSG00000027446
ENSMUSG00000053522	0.964058	-1.87771	2.56662	-0.731587	0.464421	1	ENSMUSG00000053522	16858	Lgals7	7	28863853	28866284	1	protein_coding	lectin, galactose binding, soluble 7 [Source:MGI Symbol;Acc:MGI:1316742]	NA	NA	NA	ENSMUSG00000053522
ENSMUSG00000105494	0.559687	-1.87723	3.94411	-0.475957	0.634105	NA	ENSMUSG00000105494	NA	Gm44310	15	36583544	36583669	1	miRNA	predicted gene, 44310 [Source:MGI Symbol;Acc:MGI:5690702]	NA	NA	NA	ENSMUSG00000105494
ENSMUSG00000115823	0.104083	-1.87591	5.49405	-0.341443	0.73277	NA	ENSMUSG00000115823	NA	NA	NA	NA	NA	NA	NA	NA	NA	NA	NA	ENSMUSG00000115823
ENSMUSG00000054128	1.01871	-1.87572	1.35304	-1.3863	0.165655	1	ENSMUSG00000054128	15033	H2-T3	17	36185572	36190287	-1	protein_coding	histocompatibility 2, T region locus 3 [Source:MGI Symbol;Acc:MGI:95959]	NA	NA	NA	ENSMUSG00000054128
ENSMUSG00000094467	10.1962	-1.87559	1.48499	-1.26303	0.206577	1	ENSMUSG00000094467	NA	Gm24307	6	149576461	149576561	1	miRNA	predicted gene, 24307 [Source:MGI Symbol;Acc:MGI:5454084]	NA	NA	NA	ENSMUSG00000094467
ENSMUSG00000083054	0.513842	-1.87524	2.01036	-0.93279	0.350928	NA	ENSMUSG00000083054	NA	Gm12986	4	136608840	136609806	-1	processed_pseudogene	predicted gene 12986 [Source:MGI Symbol;Acc:MGI:3651584]	NA	NA	NA	ENSMUSG00000083054
ENSMUSG00000082996	0.22815	-1.87263	3.49667	-0.535548	0.592271	NA	ENSMUSG00000082996	NA	Gm6238	X	104382042	104382506	-1	processed_pseudogene	predicted pseudogene 6238 [Source:MGI Symbol;Acc:MGI:3648913]	NA	NA	NA	ENSMUSG00000082996
ENSMUSG00000117218	0.195976	-1.87107	4.24399	-0.440875	0.659304	NA	ENSMUSG00000117218	NA	NA	NA	NA	NA	NA	NA	NA	NA	NA	NA	ENSMUSG00000117218
ENSMUSG00000109521	0.132849	-1.86952	5.49427	-0.340267	0.733656	NA	ENSMUSG00000109521	NA	Olfr1285	2	111406534	111409398	1	transcribed_unprocessed_pseudogene	olfactory receptor 1285 [Source:MGI Symbol;Acc:MGI:3031119]	NA	NA	NA	ENSMUSG00000109521
ENSMUSG00000113656	0.737129	-1.86887	1.68813	-1.10706	0.268266	NA	ENSMUSG00000113656	NA	AC124516.3	12	98642225	98644053	1	TEC		NA	NA	NA	ENSMUSG00000113656
ENSMUSG00000083725	0.251041	-1.86758	2.97827	-0.627067	0.530615	NA	ENSMUSG00000083725	NA	Gm11865	4	16246269	16249514	1	processed_pseudogene	predicted gene 11865 [Source:MGI Symbol;Acc:MGI:3650453]	NA	NA	NA	ENSMUSG00000083725
ENSMUSG00000112889	0.260127	-1.86661	3.46335	-0.53896	0.589914	NA	ENSMUSG00000112889	NA	AC158636.2	10	82851255	82852647	-1	TEC		NA	NA	NA	ENSMUSG00000112889
ENSMUSG00000079410	1.96996	-1.86646	2.35998	-0.790879	0.429015	1	ENSMUSG00000079410	100040671	Gm2897	14	3049285	3076840	1	protein_coding	predicted gene 2897 [Source:MGI Symbol;Acc:MGI:3781075]	NA	NA	NA	ENSMUSG00000079410
ENSMUSG00000109890	3.33486	-1.86543	0.758155	-2.46049	0.0138748	1	ENSMUSG00000109890	NA	AU023762	9	113496746	113611783	-1	lincRNA	expressed sequence AU023762 [Source:MGI Symbol;Acc:MGI:2143225]	NA	NA	NA	ENSMUSG00000109890
ENSMUSG00000074113	0.224042	-1.86506	4.18689	-0.445453	0.655992	NA	ENSMUSG00000074113	NA	Gm10629	8	106283307	106300017	1	lincRNA	predicted gene 10629 [Source:MGI Symbol;Acc:MGI:3642307]	NA	NA	NA	ENSMUSG00000074113
ENSMUSG00000104248	0.129842	-1.86395	5.49445	-0.339241	0.734428	NA	ENSMUSG00000104248	NA	Gm38152	1	176370155	176373720	-1	TEC	predicted gene, 38152 [Source:MGI Symbol;Acc:MGI:5611380]	NA	NA	NA	ENSMUSG00000104248
ENSMUSG00000064859	0.103169	-1.86379	5.49446	-0.339212	0.73445	NA	ENSMUSG00000064859	NA	Gm24524	5	86079766	86079935	1	snRNA	predicted gene, 24524 [Source:MGI Symbol;Acc:MGI:5454301]	NA	NA	NA	ENSMUSG00000064859
ENSMUSG00000089712	2.43424	-1.86298	1.15552	-1.61225	0.106908	1	ENSMUSG00000089712	NA	Gm15889	8	94377872	94380317	1	lincRNA	predicted gene 15889 [Source:MGI Symbol;Acc:MGI:3802159]	NA	NA	NA	ENSMUSG00000089712
ENSMUSG00000101813	0.22618	-1.8611	3.49972	-0.531785	0.594875	NA	ENSMUSG00000101813	NA	Gm28503	12	20804562	20804708	-1	transcribed_processed_pseudogene	predicted gene 28503 [Source:MGI Symbol;Acc:MGI:5579209]	NA	NA	NA	ENSMUSG00000101813
ENSMUSG00000031481	0.172663	-1.85768	5.29067	-0.351123	0.725496	NA	ENSMUSG00000031481	234129	Tpte	8	22283441	22371418	1	protein_coding	transmembrane phosphatase with tensin homology [Source:MGI Symbol;Acc:MGI:2446460]	protein phosphatase(PC00195)	NA	NA	ENSMUSG00000031481
ENSMUSG00000087132	1.15081	-1.85718	1.43092	-1.2979	0.194323	1	ENSMUSG00000087132	NA	A930001C03Rik	19	4439003	4448332	1	processed_transcript	RIKEN cDNA A930001C03 gene [Source:MGI Symbol;Acc:MGI:2441838]	NA	NA	NA	ENSMUSG00000087132
ENSMUSG00000097934	0.193209	-1.85713	5.20728	-0.356641	0.721361	NA	ENSMUSG00000097934	NA	6720483E21Rik	1	20888650	20890473	-1	lincRNA	RIKEN cDNA 6720483E21 gene [Source:MGI Symbol;Acc:MGI:1924991]	NA	NA	NA	ENSMUSG00000097934
ENSMUSG00000112097	0.191744	-1.85712	5.21519	-0.356099	0.721766	NA	ENSMUSG00000112097	NA	AC122829.1	10	67665359	67666745	1	lincRNA		NA	NA	NA	ENSMUSG00000112097
ENSMUSG00000017868	0.775705	-1.85656	2.28975	-0.810814	0.417473	NA	ENSMUSG00000017868	27219	Sgk2	2	162987330	163014127	1	protein_coding	serum/glucocorticoid regulated kinase 2 [Source:MGI Symbol;Acc:MGI:1351318]	annexin(PC00050)	calmodulin(PC00061)	non-receptor serine/threonine protein kinase(PC00167)	ENSMUSG00000017868
ENSMUSG00000114800	1.41325	-1.85352	1.77383	-1.04492	0.29606	1	ENSMUSG00000114800	NA	AC022682.2	13	37761748	37768147	1	lincRNA		NA	NA	NA	ENSMUSG00000114800
ENSMUSG00000114251	8.98173	-1.85319	2.46267	-0.752513	0.451743	1	ENSMUSG00000114251	NA	AC134860.1	13	35990861	35991520	-1	processed_pseudogene		NA	NA	NA	ENSMUSG00000114251
ENSMUSG00000086390	0.131952	-1.85117	5.49489	-0.33689	0.7362	NA	ENSMUSG00000086390	NA	1810019D21Rik	8	106135400	106138525	1	processed_transcript	RIKEN cDNA 1810019D21 gene [Source:MGI Symbol;Acc:MGI:1917021]	NA	NA	NA	ENSMUSG00000086390
ENSMUSG00000026679	1.03819	-1.8478	1.15592	-1.59856	0.109919	1	ENSMUSG00000026679	71233	Enkur	2	21180731	21205365	-1	protein_coding	enkurin, TRPC channel interacting protein [Source:MGI Symbol;Acc:MGI:1918483]	NA	NA	NA	ENSMUSG00000026679
ENSMUSG00000032999	0.1018	-1.84543	5.49508	-0.335834	0.736996	NA	ENSMUSG00000032999	97895	Nlrp4f	13	65177111	65205977	-1	protein_coding	NLR family, pyrin domain containing 4F [Source:MGI Symbol;Acc:MGI:2145528]	NA	NA	NA	ENSMUSG00000032999
ENSMUSG00000074841	0.356535	-1.84538	2.98031	-0.61919	0.535791	NA	ENSMUSG00000074841	NA	Cbx3-ps1	13	65894215	65894759	-1	processed_pseudogene	chromobox 3, pseudogene 1 [Source:MGI Symbol;Acc:MGI:1890538]	NA	NA	NA	ENSMUSG00000074841
ENSMUSG00000048904	0.129432	-1.8387	5.49531	-0.334595	0.737931	NA	ENSMUSG00000048904	18014	Neurog1	13	56250478	56252163	-1	protein_coding	neurogenin 1 [Source:MGI Symbol;Acc:MGI:107754]	basic helix-loop-helix transcription factor(PC00055)	nuclease(PC00170)	NA	ENSMUSG00000048904
ENSMUSG00000084884	0.16072	-1.83813	5.49533	-0.334489	0.73801	NA	ENSMUSG00000084884	NA	Gm12289	11	64012615	64015224	1	antisense_RNA	predicted gene 12289 [Source:MGI Symbol;Acc:MGI:3649419]	NA	NA	NA	ENSMUSG00000084884
ENSMUSG00000102319	0.227822	-1.83414	4.18586	-0.438175	0.66126	NA	ENSMUSG00000102319	NA	Gm37626	1	44560885	44565447	1	TEC	predicted gene, 37626 [Source:MGI Symbol;Acc:MGI:5610854]	NA	NA	NA	ENSMUSG00000102319
ENSMUSG00000024459	2.89278	-1.83292	1.2433	-1.47424	0.140418	1	ENSMUSG00000024459	240095	H2-M5	17	36984061	36989537	-1	protein_coding	histocompatibility 2, M region locus 5 [Source:MGI Symbol;Acc:MGI:95917]	NA	NA	NA	ENSMUSG00000024459
ENSMUSG00000114390	3.755	-1.83001	1.12676	-1.62413	0.104347	1	ENSMUSG00000114390	NA	AC124680.1	14	15999768	16037271	-1	lincRNA		NA	NA	NA	ENSMUSG00000114390
ENSMUSG00000099354	6.82647	-1.8288	1.02543	-1.78344	0.0745141	1	ENSMUSG00000099354	NA	1700124L16Rik	6	83761756	83762865	-1	antisense_RNA	RIKEN cDNA 1700124L16 gene [Source:MGI Symbol;Acc:MGI:1915184]	NA	NA	NA	ENSMUSG00000099354
ENSMUSG00000109268	1.55902	-1.82727	1.14938	-1.58979	0.111881	1	ENSMUSG00000109268	NA	9530078K11Rik	7	92902179	92902872	1	TEC	RIKEN cDNA 9530078K11 gene [Source:MGI Symbol;Acc:MGI:1925814]	NA	NA	NA	ENSMUSG00000109268
ENSMUSG00000103939	1.02361	-1.82627	1.07028	-1.70635	0.0879433	1	ENSMUSG00000103939	NA	Ighv3-4	12	114253617	114254051	-1	IG_V_gene	immunoglobulin heavy variable V3-4 [Source:MGI Symbol;Acc:MGI:3644034]	NA	NA	NA	ENSMUSG00000103939
ENSMUSG00000066245	3.68	-1.82541	1.1522	-1.58428	0.113129	1	ENSMUSG00000066245	NA	Gm10156	7	107863039	107863500	1	processed_pseudogene	predicted gene 10156 [Source:MGI Symbol;Acc:MGI:3642344]	NA	NA	NA	ENSMUSG00000066245
ENSMUSG00000067771	0.349184	-1.8248	4.70555	-0.387797	0.698166	NA	ENSMUSG00000067771	434795	Gm14685	X	73117047	73129262	1	protein_coding	predicted gene 14685 [Source:MGI Symbol;Acc:MGI:3710618]	NA	NA	NA	ENSMUSG00000067771
ENSMUSG00000034115	1.17592	-1.82225	1.07895	-1.68891	0.091236	1	ENSMUSG00000034115	24046	Scn11a	9	119753759	119825456	-1	protein_coding	sodium channel, voltage-gated, type XI, alpha [Source:MGI Symbol;Acc:MGI:1345149]	voltage-gated calcium channel(PC00240)	voltage-gated sodium channel(PC00243)	NA	ENSMUSG00000034115
ENSMUSG00000064791	0.489025	-1.8208	2.70032	-0.674292	0.500126	NA	ENSMUSG00000064791	NA	Snord14e	9	40804748	40804837	1	snoRNA	small nucleolar RNA, C/D box 14E [Source:MGI Symbol;Acc:MGI:3851606]	NA	NA	NA	ENSMUSG00000064791
ENSMUSG00000040728	5.56008	-1.81668	1.27815	-1.42134	0.155219	1	ENSMUSG00000040728	207920	Esrp1	4	11331933	11386783	-1	protein_coding	epithelial splicing regulatory protein 1 [Source:MGI Symbol;Acc:MGI:1917326]	ribosomal protein(PC00202)	NA	NA	ENSMUSG00000040728
ENSMUSG00000117001	25.3974	-1.81484	0.895113	-2.0275	0.0426117	1	ENSMUSG00000117001	NA	NA	NA	NA	NA	NA	NA	NA	NA	NA	NA	ENSMUSG00000117001
ENSMUSG00000043050	0.355655	-1.81326	2.72932	-0.664364	0.506457	NA	ENSMUSG00000043050	21959	Tnp2	16	10787936	10788655	-1	protein_coding	transition protein 2 [Source:MGI Symbol;Acc:MGI:98785]	chromatin/chromatin-binding protein(PC00077)	NA	NA	ENSMUSG00000043050
ENSMUSG00000106300	1.95731	-1.81027	1.18358	-1.52948	0.126146	1	ENSMUSG00000106300	NA	Gm42765	5	30529457	30543830	1	antisense_RNA	predicted gene 42765 [Source:MGI Symbol;Acc:MGI:5662902]	NA	NA	NA	ENSMUSG00000106300
ENSMUSG00000046240	0.627023	-1.80874	1.98187	-0.912642	0.361431	NA	ENSMUSG00000046240	72927	Hepacam	9	37367351	37386575	1	protein_coding	hepatocyte cell adhesion molecule [Source:MGI Symbol;Acc:MGI:1920177]	cell adhesion molecule(PC00069)	immunoglobulin receptor superfamily(PC00124)	protein kinase(PC00193)	ENSMUSG00000046240
ENSMUSG00000030470	0.2248	-1.80753	5.47646	-0.330054	0.741359	NA	ENSMUSG00000030470	13009	Csrp3	7	48830398	48848033	-1	protein_coding	cysteine and glycine-rich protein 3 [Source:MGI Symbol;Acc:MGI:1330824]	actin family cytoskeletal protein(PC00041)	NA	NA	ENSMUSG00000030470
ENSMUSG00000085444	0.89406	-1.80663	1.52528	-1.18446	0.236231	NA	ENSMUSG00000085444	NA	Gm13936	2	110196889	110256131	1	antisense_RNA	predicted gene 13936 [Source:MGI Symbol;Acc:MGI:3651878]	NA	NA	NA	ENSMUSG00000085444
ENSMUSG00000113363	0.186781	-1.80611	5.49644	-0.328596	0.742461	NA	ENSMUSG00000113363	NA	AC127270.1	12	12865570	12874689	1	lincRNA		NA	NA	NA	ENSMUSG00000113363
ENSMUSG00000116876	0.759775	-1.80538	4.60277	-0.392237	0.694883	NA	ENSMUSG00000116876	NA	NA	NA	NA	NA	NA	NA	NA	NA	NA	NA	ENSMUSG00000116876
ENSMUSG00000104598	0.195171	-1.80429	5.47653	-0.329459	0.741809	NA	ENSMUSG00000104598	NA	Gm30214	14	53032417	53039466	-1	antisense_RNA	predicted gene, 30214 [Source:MGI Symbol;Acc:MGI:5589373]	NA	NA	NA	ENSMUSG00000104598
ENSMUSG00000097612	0.560055	-1.80103	1.50005	-1.20065	0.229888	NA	ENSMUSG00000097612	NA	Gm26509	1	106090068	106091015	1	processed_pseudogene	predicted gene, 26509 [Source:MGI Symbol;Acc:MGI:5477003]	NA	NA	NA	ENSMUSG00000097612
ENSMUSG00000112471	1.47727	-1.80054	1.38957	-1.29575	0.195061	1	ENSMUSG00000112471	NA	AC137067.2	10	75344472	75353033	1	transcribed_processed_pseudogene		NA	NA	NA	ENSMUSG00000112471
ENSMUSG00000079494	0.319667	-1.80027	2.91165	-0.618299	0.536378	NA	ENSMUSG00000079494	69049	Nat8f5	6	85817218	85820972	-1	protein_coding	N-acetyltransferase 8 (GCN5-related) family member 5 [Source:MGI Symbol;Acc:MGI:1916299]	acetyltransferase(PC00038)	NA	NA	ENSMUSG00000079494
ENSMUSG00000080914	0.906497	-1.79676	1.36678	-1.31459	0.188648	NA	ENSMUSG00000080914	NA	Gm7129	X	13326023	13327019	-1	processed_pseudogene	predicted gene 7129 [Source:MGI Symbol;Acc:MGI:3648820]	NA	NA	NA	ENSMUSG00000080914
ENSMUSG00000111517	2.03402	-1.79586	1.0372	-1.73146	0.0833696	1	ENSMUSG00000111517	258786	Olfr1238	2	89401991	89409676	-1	protein_coding	olfactory receptor 1238 [Source:MGI Symbol;Acc:MGI:3031072]	NA	NA	NA	ENSMUSG00000111517
ENSMUSG00000097734	0.658145	-1.79389	1.41848	-1.26466	0.205994	NA	ENSMUSG00000097734	NA	B930082K07Rik	9	60687719	60690397	1	lincRNA	RIKEN cDNA B930082K07 gene [Source:MGI Symbol;Acc:MGI:2445108]	NA	NA	NA	ENSMUSG00000097734
ENSMUSG00000038115	0.381701	-1.79184	2.0072	-0.892707	0.372014	NA	ENSMUSG00000038115	243634	Ano2	6	125690419	126040126	1	protein_coding	anoctamin 2 [Source:MGI Symbol;Acc:MGI:2387214]	NA	NA	NA	ENSMUSG00000038115
ENSMUSG00000083362	2.30058	-1.79115	1.00873	-1.77565	0.0757904	1	ENSMUSG00000083362	NA	Gm8606	X	155504037	155504924	-1	processed_pseudogene	predicted gene 8606 [Source:MGI Symbol;Acc:MGI:3646345]	NA	NA	NA	ENSMUSG00000083362
ENSMUSG00000090467	4.50766	-1.79084	1.82226	-0.982759	0.325726	1	ENSMUSG00000090467	NA	Gm4613	7	25828602	25828877	-1	processed_pseudogene	predicted gene 4613 [Source:MGI Symbol;Acc:MGI:3782796]	NA	NA	NA	ENSMUSG00000090467
ENSMUSG00000003863	1.39496	-1.79024	1.40211	-1.27681	0.201668	1	ENSMUSG00000003863	76787	Ppfia3	7	45339122	45367019	-1	protein_coding	protein tyrosine phosphatase, receptor type, f polypeptide (PTPRF), interacting protein (liprin), alpha 3 [Source:MGI Symbol;Acc:MGI:1924037]	NA	NA	NA	ENSMUSG00000003863
ENSMUSG00000046041	0.732289	-1.78949	2.07808	-0.861127	0.389168	NA	ENSMUSG00000046041	258547	Olfr803	10	129690621	129694286	-1	protein_coding	olfactory receptor 803 [Source:MGI Symbol;Acc:MGI:3030637]	NA	NA	NA	ENSMUSG00000046041
ENSMUSG00000095387	0.854408	-1.78919	1.41334	-1.26593	0.205539	NA	ENSMUSG00000095387	NA	Trav6d-4	14	52753367	52753846	1	TR_V_gene	T cell receptor alpha variable 6D-4 [Source:MGI Symbol;Acc:MGI:2685547]	immunoglobulin(PC00123)	NA	NA	ENSMUSG00000095387
ENSMUSG00000073652	0.337507	-1.78898	2.95033	-0.606366	0.544272	NA	ENSMUSG00000073652	NA	Apol7d	1	71652837	71662843	1	antisense_RNA	apolipoprotein L 7d [Source:MGI Symbol;Acc:MGI:3723449]	NA	NA	NA	ENSMUSG00000073652
ENSMUSG00000078494	0.352059	-1.78803	2.52604	-0.707838	0.479046	NA	ENSMUSG00000078494	NA	Gm13201	4	148071392	148075420	-1	antisense_RNA	predicted gene 13201 [Source:MGI Symbol;Acc:MGI:3649941]	NA	NA	NA	ENSMUSG00000078494
ENSMUSG00000076484	0.184952	-1.78713	5.21817	-0.342482	0.731988	NA	ENSMUSG00000076484	NA	Trbj1-2	6	41534001	41534048	1	TR_J_gene	T cell receptor beta joining 1-2 [Source:MGI Symbol;Acc:MGI:4439569]	NA	NA	NA	ENSMUSG00000076484
ENSMUSG00000085712	0.402319	-1.78701	2.31438	-0.772134	0.440035	NA	ENSMUSG00000085712	NA	Gm15124	10	80371955	80373216	1	antisense_RNA	predicted gene 15124 [Source:MGI Symbol;Acc:MGI:3705261]	NA	NA	NA	ENSMUSG00000085712
ENSMUSG00000068647	0.373867	-1.78626	2.90679	-0.614514	0.538876	NA	ENSMUSG00000068647	258389	Olfr1278	2	111290136	111298886	1	protein_coding	olfactory receptor 1278 [Source:MGI Symbol;Acc:MGI:3031112]	NA	NA	NA	ENSMUSG00000068647
ENSMUSG00000030399	2.0384	-1.78567	1.72612	-1.0345	0.300905	1	ENSMUSG00000030399	12715	Ckm	7	19404776	19422841	1	protein_coding	creatine kinase, muscle [Source:MGI Symbol;Acc:MGI:88413]	amino acid kinase(PC00045)	NA	NA	ENSMUSG00000030399
ENSMUSG00000098498	0.521939	-1.78455	1.7864	-0.998963	0.317813	NA	ENSMUSG00000098498	NA	Mir8099-1	3	95139060	95139186	-1	miRNA	microRNA 8099-1 [Source:MGI Symbol;Acc:MGI:5531299]	NA	NA	NA	ENSMUSG00000098498
ENSMUSG00000038528	1.46307	-1.7844	1.18672	-1.50364	0.132675	1	ENSMUSG00000038528	215928	Mfsd4b5	10	39958061	39986646	-1	protein_coding	major facilitator superfamily domain containing 4B5 [Source:MGI Symbol;Acc:MGI:2446139]	NA	NA	NA	ENSMUSG00000038528
ENSMUSG00000116630	1.53721	-1.78384	1.21374	-1.4697	0.141642	1	ENSMUSG00000116630	NA	NA	NA	NA	NA	NA	NA	NA	NA	NA	NA	ENSMUSG00000116630
ENSMUSG00000091730	0.694551	-1.78323	1.3645	-1.30688	0.191254	NA	ENSMUSG00000091730	NA	Gm17230	10	20625635	20629576	1	processed_pseudogene	predicted gene 17230 [Source:MGI Symbol;Acc:MGI:4938057]	NA	NA	NA	ENSMUSG00000091730
ENSMUSG00000110930	0.192659	-1.78261	5.477	-0.325472	0.744824	NA	ENSMUSG00000110930	NA	AC126257.2	9	56932431	56933268	-1	processed_pseudogene		NA	NA	NA	ENSMUSG00000110930
ENSMUSG00000117167	0.840867	-1.78258	1.33964	-1.33065	0.183306	NA	ENSMUSG00000117167	NA	NA	NA	NA	NA	NA	NA	NA	NA	NA	NA	ENSMUSG00000117167
ENSMUSG00000046085	0.27425	-1.78193	3.45892	-0.515171	0.606434	NA	ENSMUSG00000046085	NA	4931422A03Rik	2	103966943	104028361	-1	protein_coding	RIKEN cDNA 4931422A03 gene [Source:MGI Symbol;Acc:MGI:1918236]	NA	NA	NA	ENSMUSG00000046085
ENSMUSG00000064925	1.66941	-1.78049	1.20747	-1.47456	0.14033	1	ENSMUSG00000064925	NA	Snora62	9	120130415	120130563	1	snoRNA	small nucleolar RNA, H/ACA box 62 [Source:MGI Symbol;Acc:MGI:2148179]	NA	NA	NA	ENSMUSG00000064925
ENSMUSG00000080793	0.334279	-1.78023	2.22544	-0.799947	0.423742	NA	ENSMUSG00000080793	NA	Cbx3-ps3	4	83701084	83702036	1	processed_pseudogene	chromobox 3, pseudogene 3 [Source:MGI Symbol;Acc:MGI:1890540]	NA	NA	NA	ENSMUSG00000080793
ENSMUSG00000111548	0.376504	-1.77966	2.01053	-0.885171	0.376064	NA	ENSMUSG00000111548	NA	AC167244.2	9	31434043	31434707	-1	processed_pseudogene		NA	NA	NA	ENSMUSG00000111548
ENSMUSG00000106624	0.554792	-1.77957	1.695	-1.04989	0.293767	NA	ENSMUSG00000106624	NA	Gm8853	6	70408631	70409974	1	processed_pseudogene	predicted gene 8853 [Source:MGI Symbol;Acc:MGI:3644164]	NA	NA	NA	ENSMUSG00000106624
ENSMUSG00000085272	0.571729	-1.77944	2.03366	-0.874993	0.381578	NA	ENSMUSG00000085272	381835	Sbk3	7	4965260	4971168	-1	protein_coding	SH3 domain binding kinase family, member 3 [Source:MGI Symbol;Acc:MGI:2685924]	protein kinase(PC00193)	NA	NA	ENSMUSG00000085272
ENSMUSG00000058050	1.6442	-1.77866	1.48345	-1.199	0.230527	1	ENSMUSG00000058050	NA	Gm9234	7	121015142	121015633	-1	processed_pseudogene	predicted pseudogene 9234 [Source:MGI Symbol;Acc:MGI:3648545]	NA	NA	NA	ENSMUSG00000058050
ENSMUSG00000076901	0.466487	-1.77849	2.169	-0.81996	0.412239	NA	ENSMUSG00000076901	NA	Traj28	14	54191661	54191725	1	TR_J_gene	T cell receptor alpha joining 28 [Source:MGI Symbol;Acc:MGI:4439744]	NA	NA	NA	ENSMUSG00000076901
ENSMUSG00000108525	0.308351	-1.77745	2.51538	-0.706632	0.479795	NA	ENSMUSG00000108525	NA	Gm7443	6	83792602	83792979	-1	processed_pseudogene	predicted gene 7443 [Source:MGI Symbol;Acc:MGI:3644945]	NA	NA	NA	ENSMUSG00000108525
ENSMUSG00000116962	0.455619	-1.7765	2.11762	-0.838915	0.401517	NA	ENSMUSG00000116962	NA	NA	NA	NA	NA	NA	NA	NA	NA	NA	NA	ENSMUSG00000116962
ENSMUSG00000072968	0.695332	-1.77592	1.55038	-1.14547	0.252015	NA	ENSMUSG00000072968	NA	Gm17728	17	9422060	9422458	1	protein_coding	predicted gene, 17728 [Source:MGI Symbol;Acc:MGI:4937362]	NA	NA	NA	ENSMUSG00000072968
ENSMUSG00000086818	0.217141	-1.77469	3.45294	-0.513964	0.607277	NA	ENSMUSG00000086818	NA	Ctrcos	4	141844321	141846990	1	antisense_RNA	chymotrypsin C (caldecrin), opposite strand [Source:MGI Symbol;Acc:MGI:1916389]	NA	NA	NA	ENSMUSG00000086818
ENSMUSG00000065728	0.729875	-1.77384	1.53674	-1.15428	0.248383	NA	ENSMUSG00000065728	NA	Gm26175	6	97162817	97162947	-1	snoRNA	predicted gene, 26175 [Source:MGI Symbol;Acc:MGI:5455952]	NA	NA	NA	ENSMUSG00000065728
ENSMUSG00000112007	1.1063	-1.77276	1.51627	-1.16916	0.242341	1	ENSMUSG00000112007	NA	AC153864.1	10	77652744	77653359	-1	processed_pseudogene		NA	NA	NA	ENSMUSG00000112007
ENSMUSG00000103222	0.800433	-1.77265	1.2982	-1.36547	0.172107	NA	ENSMUSG00000103222	NA	Gm37729	1	160985758	160986929	1	TEC	predicted gene, 37729 [Source:MGI Symbol;Acc:MGI:5610957]	NA	NA	NA	ENSMUSG00000103222
ENSMUSG00000111003	0.369485	-1.77258	2.01041	-0.881701	0.377938	NA	ENSMUSG00000111003	NA	AC120394.1	9	122119145	122119495	1	TEC		NA	NA	NA	ENSMUSG00000111003
ENSMUSG00000081099	1.61523	-1.77219	1.26654	-1.39924	0.161742	1	ENSMUSG00000081099	NA	Gm5270	2	161254456	161255457	-1	processed_pseudogene	predicted gene 5270 [Source:MGI Symbol;Acc:MGI:3647658]	NA	NA	NA	ENSMUSG00000081099
ENSMUSG00000033409	0.671611	-1.77163	1.67255	-1.05924	0.289492	NA	ENSMUSG00000033409	668110	Syce1l	8	113643213	113655533	1	protein_coding	synaptonemal complex central element protein 1 like [Source:MGI Symbol;Acc:MGI:1922247]	NA	NA	NA	ENSMUSG00000033409
ENSMUSG00000079988	0.87861	-1.7707	1.50872	-1.17364	0.240538	NA	ENSMUSG00000079988	NA	Gm11970	11	6446218	6446537	1	processed_pseudogene	predicted gene 11970 [Source:MGI Symbol;Acc:MGI:3650056]	NA	NA	NA	ENSMUSG00000079988
ENSMUSG00000022226	0.245439	-1.77017	4.13894	-0.427686	0.66888	NA	ENSMUSG00000022226	17225	Mcpt2	14	56042123	56044634	1	protein_coding	mast cell protease 2 [Source:MGI Symbol;Acc:MGI:96938]	serine protease(PC00203)	NA	NA	ENSMUSG00000022226
ENSMUSG00000053465	0.283768	-1.77011	2.88964	-0.612572	0.54016	NA	ENSMUSG00000053465	50787	Hs6st3	14	119138415	119869594	1	protein_coding	heparan sulfate 6-O-sulfotransferase 3 [Source:MGI Symbol;Acc:MGI:1354960]	transferase(PC00220)	NA	NA	ENSMUSG00000053465
ENSMUSG00000025927	0.325462	-1.76979	5.47728	-0.323116	0.746608	NA	ENSMUSG00000025927	21419	Tfap2b	1	19208914	19238576	1	protein_coding	transcription factor AP-2 beta [Source:MGI Symbol;Acc:MGI:104672]	transcription factor(PC00218)	NA	NA	ENSMUSG00000025927
ENSMUSG00000083200	1.30503	-1.76968	1.44317	-1.22625	0.220106	1	ENSMUSG00000083200	NA	Gm15066	X	144285726	144288333	-1	processed_pseudogene	predicted gene 15066 [Source:MGI Symbol;Acc:MGI:3706256]	NA	NA	NA	ENSMUSG00000083200
ENSMUSG00000047150	1.24086	-1.7686	1.5606	-1.13329	0.257094	1	ENSMUSG00000047150	75462	1700001C19Rik	17	47412734	47437376	-1	protein_coding	RIKEN cDNA 1700001C19 gene [Source:MGI Symbol;Acc:MGI:1922712]	NA	NA	NA	ENSMUSG00000047150
ENSMUSG00000096653	0.552578	-1.76857	1.80205	-0.98142	0.326386	NA	ENSMUSG00000096653	NA	Trav15d-1-dv6d-1	14	52863299	52863936	1	TR_V_gene	T cell receptor alpha variable 15D-1-DV6D-1 [Source:MGI Symbol;Acc:MGI:3651288]	immunoglobulin(PC00123)	NA	NA	ENSMUSG00000096653
ENSMUSG00000104406	0.641407	-1.76776	1.43648	-1.23061	0.218468	NA	ENSMUSG00000104406	NA	Gm38014	2	12389872	12392483	-1	TEC	predicted gene, 38014 [Source:MGI Symbol;Acc:MGI:5611242]	NA	NA	NA	ENSMUSG00000104406
ENSMUSG00000076271	0.976072	-1.76694	1.3419	-1.31674	0.187925	1	ENSMUSG00000076271	NA	Mir697	4	124731694	124731802	1	miRNA	microRNA 697 [Source:MGI Symbol;Acc:MGI:3629652]	NA	NA	NA	ENSMUSG00000076271
ENSMUSG00000092243	0.396248	-1.76661	1.85306	-0.953351	0.340412	NA	ENSMUSG00000092243	630294	Gm7030	17	36109719	36129425	-1	protein_coding	predicted gene 7030 [Source:MGI Symbol;Acc:MGI:3647514]	NA	NA	NA	ENSMUSG00000092243
ENSMUSG00000114038	0.31348	-1.76642	1.96583	-0.898563	0.368886	NA	ENSMUSG00000114038	NA	CT030197.1	13	71709055	71956552	-1	processed_transcript		NA	NA	NA	ENSMUSG00000114038
ENSMUSG00000091193	0.405872	-1.76622	2.3158	-0.762685	0.445651	NA	ENSMUSG00000091193	NA	Gm17333	16	77846693	77853020	1	protein_coding	predicted gene, 17333 [Source:MGI Symbol;Acc:MGI:4936967]	NA	NA	NA	ENSMUSG00000091193
ENSMUSG00000078949	0.269156	-1.76607	4.99913	-0.353275	0.723882	NA	ENSMUSG00000078949	100043899	R3hdml	2	163492318	163502612	1	protein_coding	R3H domain containing-like [Source:MGI Symbol;Acc:MGI:3650937]	defense/immunity protein(PC00090)	NA	NA	ENSMUSG00000078949
ENSMUSG00000116705	1.02776	-1.76574	1.42109	-1.24252	0.214045	1	ENSMUSG00000116705	NA	NA	NA	NA	NA	NA	NA	NA	NA	NA	NA	ENSMUSG00000116705
ENSMUSG00000087347	2.35359	-1.76465	1.26984	-1.38967	0.16463	1	ENSMUSG00000087347	NA	1700047K16Rik	11	58322988	58324439	1	processed_transcript	RIKEN cDNA 1700047K16 gene [Source:MGI Symbol;Acc:MGI:1920585]	NA	NA	NA	ENSMUSG00000087347
ENSMUSG00000111045	1.47278	-1.76458	1.39323	-1.26654	0.205321	1	ENSMUSG00000111045	NA	AC164625.1	10	40180657	40183692	-1	lincRNA		NA	NA	NA	ENSMUSG00000111045
ENSMUSG00000107432	0.899464	-1.76395	1.41077	-1.25034	0.211175	NA	ENSMUSG00000107432	NA	Gm36189	6	88882655	88883177	1	processed_pseudogene	predicted gene, 36189 [Source:MGI Symbol;Acc:MGI:5595348]	NA	NA	NA	ENSMUSG00000107432
ENSMUSG00000030499	32.5485	-1.76212	0.681083	-2.58723	0.00967499	1	ENSMUSG00000030499	233107	Kctd15	7	34639014	34656732	-1	protein_coding	potassium channel tetramerisation domain containing 15 [Source:MGI Symbol;Acc:MGI:2385276]	enzyme modulator(PC00095)	NA	NA	ENSMUSG00000030499
ENSMUSG00000081480	0.976931	-1.76191	1.47499	-1.19452	0.232274	1	ENSMUSG00000081480	NA	Gm13608	2	31985059	31986464	1	processed_pseudogene	predicted gene 13608 [Source:MGI Symbol;Acc:MGI:3651499]	NA	NA	NA	ENSMUSG00000081480
ENSMUSG00000111575	0.667075	-1.7615	1.63967	-1.0743	0.282689	NA	ENSMUSG00000111575	NA	AC159462.3	10	43690726	43691828	-1	lincRNA		NA	NA	NA	ENSMUSG00000111575
ENSMUSG00000105815	0.460535	-1.76105	1.63952	-1.07413	0.282764	NA	ENSMUSG00000105815	NA	Gm43541	5	122567524	122568104	-1	TEC	predicted gene 43541 [Source:MGI Symbol;Acc:MGI:5663678]	NA	NA	NA	ENSMUSG00000105815
ENSMUSG00000057160	0.822659	-1.7607	1.19492	-1.47349	0.140618	NA	ENSMUSG00000057160	NA	Gm16372	12	24493207	24493656	-1	processed_pseudogene	predicted pseudogene 16372 [Source:MGI Symbol;Acc:MGI:3648102]	NA	NA	NA	ENSMUSG00000057160
ENSMUSG00000104669	0.182074	-1.75899	4.23361	-0.415483	0.677788	NA	ENSMUSG00000104669	NA	Gm38411	3	94368612	94377245	-1	antisense_RNA	predicted gene, 38411 [Source:MGI Symbol;Acc:MGI:5621296]	NA	NA	NA	ENSMUSG00000104669
ENSMUSG00000106372	0.270379	-1.75851	2.90863	-0.604582	0.545457	NA	ENSMUSG00000106372	NA	Igkv14-126-1	6	67876011	67876477	1	IG_V_pseudogene	immunoglobulin kappa chain variable 14-126-1 [Source:MGI Symbol;Acc:MGI:5009882]	NA	NA	NA	ENSMUSG00000106372
ENSMUSG00000115789	0.924677	-1.75768	1.37302	-1.28015	0.200492	1	ENSMUSG00000115789	NA	NA	NA	NA	NA	NA	NA	NA	NA	NA	NA	ENSMUSG00000115789
ENSMUSG00000064514	0.742051	-1.75717	1.3998	-1.2553	0.20937	NA	ENSMUSG00000064514	NA	Gm22455	9	64177123	64177193	1	snoRNA	predicted gene, 22455 [Source:MGI Symbol;Acc:MGI:5452232]	NA	NA	NA	ENSMUSG00000064514
ENSMUSG00000081729	0.948389	-1.75559	1.39645	-1.25718	0.208687	1	ENSMUSG00000081729	NA	Hspa9-ps1	X	60576946	60578878	-1	processed_pseudogene	heat shock protein 9, pseudogene 1 [Source:MGI Symbol;Acc:MGI:96246]	NA	NA	NA	ENSMUSG00000081729
ENSMUSG00000115154	0.410584	-1.75398	1.84967	-0.948266	0.342994	NA	ENSMUSG00000115154	NA	NA	NA	NA	NA	NA	NA	NA	NA	NA	NA	ENSMUSG00000115154
ENSMUSG00000094856	2.9221	-1.75347	2.71759	-0.64523	0.518778	1	ENSMUSG00000094856	NA	Gm21962	3	137671524	137672540	1	protein_coding	predicted gene, 21962 [Source:MGI Symbol;Acc:MGI:5439431]	NA	NA	NA	ENSMUSG00000094856
ENSMUSG00000102457	0.377178	-1.75347	2.0227	-0.866894	0.386	NA	ENSMUSG00000102457	NA	Gm38342	1	16618560	16621539	1	TEC	predicted gene, 38342 [Source:MGI Symbol;Acc:MGI:5611570]	NA	NA	NA	ENSMUSG00000102457
ENSMUSG00000032297	0.994694	-1.75101	2.02684	-0.863911	0.387637	1	ENSMUSG00000032297	76183	Celf6	9	59577917	59607292	1	protein_coding	CUGBP, Elav-like family member 6 [Source:MGI Symbol;Acc:MGI:1923433]	NA	NA	NA	ENSMUSG00000032297
ENSMUSG00000110529	6.72701	-1.74774	0.548018	-3.18919	0.0014267	0.600723	ENSMUSG00000110529	NA	Gm45694	8	71983903	71987153	1	TEC	predicted gene 45694 [Source:MGI Symbol;Acc:MGI:5804809]	NA	NA	NA	ENSMUSG00000110529
ENSMUSG00000097117	0.612314	-1.74682	1.70532	-1.02434	0.305675	NA	ENSMUSG00000097117	NA	Gm26730	11	116306864	116309510	1	lincRNA	predicted gene, 26730 [Source:MGI Symbol;Acc:MGI:5477224]	NA	NA	NA	ENSMUSG00000097117
ENSMUSG00000030329	89.4181	-1.7467	0.985179	-1.77298	0.0762321	1	ENSMUSG00000030329	319352	Pianp	6	124996694	125003096	1	protein_coding	PILR alpha associated neural protein [Source:MGI Symbol;Acc:MGI:2441908]	NA	NA	NA	ENSMUSG00000030329
ENSMUSG00000026354	6.93641	-1.74424	0.951883	-1.83241	0.0668898	1	ENSMUSG00000026354	226413	Lct	1	128284756	128328318	-1	protein_coding	lactase [Source:MGI Symbol;Acc:MGI:104576]	glycosidase(PC00110)	NA	NA	ENSMUSG00000026354
ENSMUSG00000103336	0.370588	-1.74092	2.53969	-0.685486	0.493038	NA	ENSMUSG00000103336	NA	Gm37993	9	88985191	88986178	1	TEC	predicted gene, 37993 [Source:MGI Symbol;Acc:MGI:5611221]	NA	NA	NA	ENSMUSG00000103336
ENSMUSG00000021404	0.362162	-1.73511	2.26871	-0.7648	0.444391	NA	ENSMUSG00000021404	20707	Serpinb9c	13	33149275	33159742	-1	protein_coding	serine (or cysteine) peptidase inhibitor, clade B, member 9c [Source:MGI Symbol;Acc:MGI:894669]	serine protease inhibitor(PC00204)	NA	NA	ENSMUSG00000021404
ENSMUSG00000103584	1.92131	-1.73415	0.995518	-1.74196	0.0815153	1	ENSMUSG00000103584	NA	Gm38053	1	176854400	176854559	-1	unprocessed_pseudogene	predicted gene, 38053 [Source:MGI Symbol;Acc:MGI:5611281]	NA	NA	NA	ENSMUSG00000103584
ENSMUSG00000111432	0.716015	-1.73125	1.66244	-1.04139	0.297693	NA	ENSMUSG00000111432	NA	AC122335.1	10	92706083	92706257	-1	processed_pseudogene		NA	NA	NA	ENSMUSG00000111432
ENSMUSG00000091722	3.24715	-1.72732	0.645157	-2.67737	0.00742029	1	ENSMUSG00000091722	380918	Siah3	14	75455982	75526141	1	protein_coding	seven in absentia homolog 3 (Drosophila) [Source:MGI Symbol;Acc:MGI:2685758]	NA	NA	NA	ENSMUSG00000091722
ENSMUSG00000054763	4.2733	-1.72625	1.46689	-1.1768	0.239274	1	ENSMUSG00000054763	619548	Defb42	14	63046991	63058149	1	protein_coding	defensin beta 42 [Source:MGI Symbol;Acc:MGI:3033850]	NA	NA	NA	ENSMUSG00000054763
ENSMUSG00000106978	23.0863	-1.72124	0.504255	-3.41343	0.000641511	0.361237	ENSMUSG00000106978	NA	N4bp2os	5	65760991	65764379	-1	processed_transcript	NEDD4 binding protein 2, opposite strand [Source:MGI Symbol;Acc:MGI:1921484]	NA	NA	NA	ENSMUSG00000106978
ENSMUSG00000096775	0.603056	-1.71965	3.88167	-0.443018	0.657753	NA	ENSMUSG00000096775	545007	Gm5796	14	4023941	4041370	1	protein_coding	predicted gene 5796 [Source:MGI Symbol;Acc:MGI:3779522]	NA	NA	NA	ENSMUSG00000096775
ENSMUSG00000021216	0.27251	-1.7181	4.07785	-0.421324	0.673519	NA	ENSMUSG00000021216	238463	Tubal3	13	3918274	3935277	1	protein_coding	tubulin, alpha-like 3 [Source:MGI Symbol;Acc:MGI:3588215]	tubulin(PC00228)	NA	NA	ENSMUSG00000021216
ENSMUSG00000097356	1.43527	-1.71131	1.20515	-1.42	0.155608	1	ENSMUSG00000097356	NA	Gm26774	6	6952170	6955900	-1	lincRNA	predicted gene, 26774 [Source:MGI Symbol;Acc:MGI:5477268]	NA	NA	NA	ENSMUSG00000097356
ENSMUSG00000112819	0.812228	-1.70999	1.29825	-1.31714	0.187791	NA	ENSMUSG00000112819	NA	AC241534.4	12	4552546	4569538	-1	lincRNA		NA	NA	NA	ENSMUSG00000112819
ENSMUSG00000097690	0.777265	-1.70133	1.55954	-1.09092	0.275309	NA	ENSMUSG00000097690	NA	4930505N22Rik	19	45998137	46013386	1	lincRNA	RIKEN cDNA 4930505N22 gene [Source:MGI Symbol;Acc:MGI:1922306]	NA	NA	NA	ENSMUSG00000097690
ENSMUSG00000061080	7.43217	-1.69671	0.95447	-1.77765	0.0754616	1	ENSMUSG00000061080	268890	Lsamp	16	39984361	42181679	1	protein_coding	limbic system-associated membrane protein [Source:MGI Symbol;Acc:MGI:1261760]	NA	NA	NA	ENSMUSG00000061080
ENSMUSG00000112026	4.74099	-1.69654	1.03371	-1.64121	0.100753	1	ENSMUSG00000112026	NA	AC168315.1	10	88134566	88135853	-1	TEC		NA	NA	NA	ENSMUSG00000112026
ENSMUSG00000082986	0.949564	-1.68958	1.31993	-1.28005	0.200529	1	ENSMUSG00000082986	NA	Gm11389	13	33686457	33689508	1	unprocessed_pseudogene	predicted gene 11389 [Source:MGI Symbol;Acc:MGI:3649830]	NA	NA	NA	ENSMUSG00000082986
ENSMUSG00000045104	2.35158	-1.68666	1.48642	-1.13471	0.256496	1	ENSMUSG00000045104	NA	Gm5514	19	21938079	21938384	1	processed_pseudogene	predicted gene 5514 [Source:MGI Symbol;Acc:MGI:3645435]	NA	NA	NA	ENSMUSG00000045104
ENSMUSG00000070877	0.635286	-1.68103	1.26984	-1.32381	0.185567	NA	ENSMUSG00000070877	546840	Ldlrad1	4	107209180	107218060	1	protein_coding	low density lipoprotein receptor class A domain containing 1 [Source:MGI Symbol;Acc:MGI:3652166]	NA	NA	NA	ENSMUSG00000070877
ENSMUSG00000110276	1.8445	-1.67603	2.22474	-0.753359	0.451234	1	ENSMUSG00000110276	NA	Gm45330	17	48730399	48738746	-1	lincRNA	predicted gene 45330 [Source:MGI Symbol;Acc:MGI:5791166]	NA	NA	NA	ENSMUSG00000110276
ENSMUSG00000028773	0.888116	-1.66838	1.7541	-0.951136	0.341535	NA	ENSMUSG00000028773	14077	Fabp3	4	130308595	130315463	1	protein_coding	fatty acid binding protein 3, muscle and heart [Source:MGI Symbol;Acc:MGI:95476]	NA	NA	NA	ENSMUSG00000028773
ENSMUSG00000040632	2.09579	-1.66479	0.989423	-1.68259	0.0924543	1	ENSMUSG00000040632	18185	Nrl	14	55518978	55524981	-1	protein_coding	neural retina leucine zipper gene [Source:MGI Symbol;Acc:MGI:102567]	basic leucine zipper transcription factor(PC00056)	nucleic acid binding(PC00171)	NA	ENSMUSG00000040632
ENSMUSG00000095681	3.41373	-1.66422	0.992411	-1.67695	0.0935524	1	ENSMUSG00000095681	NA	Gm8281	14	5071040	5093318	1	protein_coding	predicted gene, 8281 [Source:MGI Symbol;Acc:MGI:3647811]	NA	NA	NA	ENSMUSG00000095681
ENSMUSG00000115641	1.7112	-1.66192	0.873763	-1.90203	0.0571673	1	ENSMUSG00000115641	NA	NA	NA	NA	NA	NA	NA	NA	NA	NA	NA	ENSMUSG00000115641
ENSMUSG00000079324	1.07566	-1.65919	1.69087	-0.981265	0.326462	1	ENSMUSG00000079324	75721	4932414N04Rik	2	68656486	68748467	1	protein_coding	RIKEN cDNA 4932414N04 gene [Source:MGI Symbol;Acc:MGI:1922971]	NA	NA	NA	ENSMUSG00000079324
ENSMUSG00000017724	6.52767	-1.65524	0.829259	-1.99605	0.0459281	1	ENSMUSG00000017724	18612	Etv4	11	101769742	101785371	-1	protein_coding	ets variant 4 [Source:MGI Symbol;Acc:MGI:99423]	nucleic acid binding(PC00171)	signaling molecule(PC00207)	winged helix/forkhead transcription factor(PC00246)	ENSMUSG00000017724
ENSMUSG00000094792	0.442699	-1.65402	3.94604	-0.419159	0.6751	NA	ENSMUSG00000094792	NA	Trav10d	14	52810934	52811496	1	TR_V_gene	T cell receptor alpha variable 10D [Source:MGI Symbol;Acc:MGI:5293417]	NA	NA	NA	ENSMUSG00000094792
ENSMUSG00000112474	15.3129	-1.6496	0.934138	-1.76591	0.0774112	1	ENSMUSG00000112474	NA	AC147512.2	10	7458356	7458908	1	processed_pseudogene		NA	NA	NA	ENSMUSG00000112474
ENSMUSG00000089975	1.08619	-1.64895	1.13782	-1.44921	0.147278	1	ENSMUSG00000089975	NA	Gm7420	5	29217724	29218565	1	transcribed_processed_pseudogene	predicted gene 7420 [Source:MGI Symbol;Acc:MGI:3647909]	NA	NA	NA	ENSMUSG00000089975
ENSMUSG00000111673	1.57487	-1.64456	1.13799	-1.44514	0.148418	1	ENSMUSG00000111673	NA	CT025653.1	9	30954087	31031205	-1	antisense_RNA		NA	NA	NA	ENSMUSG00000111673
ENSMUSG00000106110	0.931886	-1.64366	1.34422	-1.22276	0.22142	1	ENSMUSG00000106110	NA	Gm43571	5	121715109	121718206	1	TEC	predicted gene 43571 [Source:MGI Symbol;Acc:MGI:5663708]	NA	NA	NA	ENSMUSG00000106110
ENSMUSG00000108900	1.1983	-1.64103	1.26909	-1.29307	0.195985	1	ENSMUSG00000108900	619297	C430049E01Rik	8	71520120	71525711	-1	protein_coding	RIKEN cDNA C430049E01 gene [Source:MGI Symbol;Acc:MGI:3588239]	NA	NA	NA	ENSMUSG00000108900
ENSMUSG00000032105	3.52609	-1.6398	1.43678	-1.1413	0.253744	1	ENSMUSG00000032105	170761	Pdzd3	9	44247307	44251471	-1	protein_coding	PDZ domain containing 3 [Source:MGI Symbol;Acc:MGI:2429554]	NA	NA	NA	ENSMUSG00000032105
ENSMUSG00000021927	3.76283	-1.6378	0.88396	-1.8528	0.063911	1	ENSMUSG00000021927	NA	Hnrnpa1l2-ps2	15	22713868	22714830	-1	processed_pseudogene	heterogeneous nuclear ribonucleoprotein A1-like 2, pseudogene 2 [Source:MGI Symbol;Acc:MGI:3645633]	NA	NA	NA	ENSMUSG00000021927
ENSMUSG00000072999	1.41216	-1.63724	1.11688	-1.46591	0.142674	1	ENSMUSG00000072999	NA	Gm15401	6	72629288	72637717	1	antisense_RNA	predicted gene 15401 [Source:MGI Symbol;Acc:MGI:3642201]	NA	NA	NA	ENSMUSG00000072999
ENSMUSG00000096449	1.82795	-1.63584	0.936399	-1.74695	0.0806466	1	ENSMUSG00000096449	NA	Gm4076	13	85126550	85127514	-1	processed_pseudogene	predicted gene 4076 [Source:MGI Symbol;Acc:MGI:3782251]	NA	NA	NA	ENSMUSG00000096449
ENSMUSG00000040387	1.4734	-1.63448	1.41769	-1.15292	0.248944	1	ENSMUSG00000040387	212390	Klhl32	4	24612554	24851124	-1	protein_coding	kelch-like 32 [Source:MGI Symbol;Acc:MGI:3612790]	NA	NA	NA	ENSMUSG00000040387
ENSMUSG00000044581	1.1813	-1.6324	1.40534	-1.16157	0.245412	1	ENSMUSG00000044581	102635990	4932415D10Rik	10	82282116	82316582	-1	protein_coding	RIKEN cDNA 4932415D10 gene [Source:MGI Symbol;Acc:MGI:3045298]	NA	NA	NA	ENSMUSG00000044581
ENSMUSG00000023043	9.83037	-1.63184	0.805505	-2.02586	0.0427796	1	ENSMUSG00000023043	16668	Krt18	15	102028216	102032026	1	protein_coding	keratin 18 [Source:MGI Symbol;Acc:MGI:96692]	NA	NA	NA	ENSMUSG00000023043
ENSMUSG00000110772	0.849925	-1.63157	1.31783	-1.23807	0.215691	NA	ENSMUSG00000110772	NA	AC152922.1	10	43412531	43413762	1	TEC		NA	NA	NA	ENSMUSG00000110772
ENSMUSG00000089931	0.88524	-1.63108	1.37142	-1.18934	0.234305	NA	ENSMUSG00000089931	NA	Gm8459	6	122566715	122567474	-1	processed_pseudogene	predicted gene 8459 [Source:MGI Symbol;Acc:MGI:3647456]	NA	NA	NA	ENSMUSG00000089931
ENSMUSG00000110903	1.36908	-1.62992	1.2233	-1.33239	0.182731	1	ENSMUSG00000110903	NA	AC152922.2	10	43363010	43366888	1	TEC		NA	NA	NA	ENSMUSG00000110903
ENSMUSG00000108258	1.74676	-1.62976	1.26704	-1.28628	0.198346	1	ENSMUSG00000108258	NA	Gm43913	6	148915215	148920535	-1	lincRNA	predicted gene, 43913 [Source:MGI Symbol;Acc:MGI:5690305]	NA	NA	NA	ENSMUSG00000108258
ENSMUSG00000102734	1.00825	-1.62948	1.38544	-1.17614	0.239538	1	ENSMUSG00000102734	NA	Gm37343	2	11013808	11013918	-1	TEC	predicted gene, 37343 [Source:MGI Symbol;Acc:MGI:5610571]	NA	NA	NA	ENSMUSG00000102734
ENSMUSG00000098678	0.967232	-1.62806	1.38911	-1.17201	0.241191	1	ENSMUSG00000098678	223645	Mroh6	15	75884137	75888770	-1	protein_coding	maestro heat-like repeat family member 6 [Source:MGI Symbol;Acc:MGI:5011755]	NA	NA	NA	ENSMUSG00000098678
ENSMUSG00000089815	0.469469	-1.62799	1.60956	-1.01145	0.311801	NA	ENSMUSG00000089815	NA	Gm5083	13	44121167	44125179	1	lincRNA	predicted gene 5083 [Source:MGI Symbol;Acc:MGI:3779454]	NA	NA	NA	ENSMUSG00000089815
ENSMUSG00000117648	0.508623	-1.62664	1.55257	-1.04771	0.294774	NA	ENSMUSG00000117648	NA	NA	NA	NA	NA	NA	NA	NA	NA	NA	NA	ENSMUSG00000117648
ENSMUSG00000097279	0.492177	-1.6229	1.60043	-1.01404	0.310563	NA	ENSMUSG00000097279	NA	Gm5106	5	8773577	8798523	-1	antisense_RNA	predicted gene 5106 [Source:MGI Symbol;Acc:MGI:3643983]	NA	NA	NA	ENSMUSG00000097279
ENSMUSG00000082262	7.59468	-1.6215	0.617283	-2.62684	0.00861818	1	ENSMUSG00000082262	NA	Gm14730	X	71197127	71198171	1	processed_pseudogene	predicted gene 14730 [Source:MGI Symbol;Acc:MGI:3705542]	NA	NA	NA	ENSMUSG00000082262
ENSMUSG00000042942	1.1597	-1.6194	1.10955	-1.45951	0.144424	1	ENSMUSG00000042942	381157	Greb1l	18	10325177	10562934	1	protein_coding	growth regulation by estrogen in breast cancer-like [Source:MGI Symbol;Acc:MGI:3576497]	NA	NA	NA	ENSMUSG00000042942
ENSMUSG00000108528	1.93082	-1.6159	1.31771	-1.22629	0.220088	1	ENSMUSG00000108528	NA	Gm8319	7	96202896	96203536	-1	processed_pseudogene	predicted gene 8319 [Source:MGI Symbol;Acc:MGI:3646693]	NA	NA	NA	ENSMUSG00000108528
ENSMUSG00000111343	1.34309	-1.61443	1.22095	-1.32227	0.186077	1	ENSMUSG00000111343	NA	AC159819.3	9	56504825	56506661	-1	TEC		NA	NA	NA	ENSMUSG00000111343
ENSMUSG00000067767	0.734742	-1.61404	1.26278	-1.27816	0.201192	NA	ENSMUSG00000067767	381809	Clec4b2	6	123172893	123204671	1	protein_coding	C-type lectin domain family 4, member b2 [Source:MGI Symbol;Acc:MGI:3588267]	cell adhesion molecule(PC00069)	immunoglobulin receptor superfamily(PC00124)	NA	ENSMUSG00000067767
ENSMUSG00000102384	0.95317	-1.60988	1.24425	-1.29385	0.195717	1	ENSMUSG00000102384	NA	Gm38143	7	73948423	73958042	1	processed_transcript	predicted gene, 38143 [Source:MGI Symbol;Acc:MGI:5611371]	NA	NA	NA	ENSMUSG00000102384
ENSMUSG00000082741	2.37593	-1.6073	1.31011	-1.22684	0.219882	1	ENSMUSG00000082741	NA	Gm9703	17	27530067	27530409	1	processed_pseudogene	predicted gene 9703 [Source:MGI Symbol;Acc:MGI:3780110]	NA	NA	NA	ENSMUSG00000082741
ENSMUSG00000080303	1.18043	-1.60704	1.59795	-1.00569	0.314565	1	ENSMUSG00000080303	NA	Gm12419	4	84923554	84924189	-1	processed_pseudogene	predicted gene 12419 [Source:MGI Symbol;Acc:MGI:3650581]	NA	NA	NA	ENSMUSG00000080303
ENSMUSG00000082896	5.12936	-1.60551	1.30306	-1.23211	0.21791	1	ENSMUSG00000082896	NA	Gm5844	3	18008806	18010996	1	processed_pseudogene	predicted gene 5844 [Source:MGI Symbol;Acc:MGI:3645252]	NA	NA	NA	ENSMUSG00000082896
ENSMUSG00000024411	3.38494	-1.60449	1.06736	-1.50323	0.132779	1	ENSMUSG00000024411	11829	Aqp4	18	15389394	15403684	-1	protein_coding	aquaporin 4 [Source:MGI Symbol;Acc:MGI:107387]	NA	NA	NA	ENSMUSG00000024411
ENSMUSG00000116819	0.610173	-1.60237	1.55305	-1.03176	0.302184	NA	ENSMUSG00000116819	NA	NA	NA	NA	NA	NA	NA	NA	NA	NA	NA	ENSMUSG00000116819
ENSMUSG00000045667	12.2571	-1.60143	0.800365	-2.00087	0.0454063	1	ENSMUSG00000045667	276829	Smtnl2	11	72389164	72411713	-1	protein_coding	smoothelin-like 2 [Source:MGI Symbol;Acc:MGI:2442764]	NA	NA	NA	ENSMUSG00000045667
ENSMUSG00000097640	8.15751	-1.60131	0.642128	-2.49375	0.0126402	1	ENSMUSG00000097640	NA	Gm20033	5	64708207	64804117	-1	processed_transcript	predicted gene, 20033 [Source:MGI Symbol;Acc:MGI:5012218]	NA	NA	NA	ENSMUSG00000097640
ENSMUSG00000080916	2.00607	-1.60057	1.12425	-1.42368	0.154539	1	ENSMUSG00000080916	NA	Gm12463	4	44752277	44753125	-1	processed_pseudogene	predicted gene 12463 [Source:MGI Symbol;Acc:MGI:3650648]	NA	NA	NA	ENSMUSG00000080916
ENSMUSG00000007122	1.77509	-1.60051	1.22532	-1.3062	0.191485	1	ENSMUSG00000007122	12372	Casq1	1	172209894	172219868	-1	protein_coding	calsequestrin 1 [Source:MGI Symbol;Acc:MGI:1309468]	NA	NA	NA	ENSMUSG00000007122
ENSMUSG00000022286	1.32536	-1.5975	1.39306	-1.14676	0.251483	1	ENSMUSG00000022286	252973	Grhl2	15	37233036	37363569	1	protein_coding	grainyhead-like 2 (Drosophila) [Source:MGI Symbol;Acc:MGI:2182543]	transcription factor(PC00218)	NA	NA	ENSMUSG00000022286
ENSMUSG00000025813	20.7531	-1.59711	0.662362	-2.41123	0.015899	1	ENSMUSG00000025813	26557	Homer2	7	81600481	81707527	-1	protein_coding	homer scaffolding protein 2 [Source:MGI Symbol;Acc:MGI:1347354]	NA	NA	NA	ENSMUSG00000025813
ENSMUSG00000035031	0.524384	-1.59381	2.05865	-0.774201	0.438812	NA	ENSMUSG00000035031	230558	C8a	4	104815679	104876398	-1	protein_coding	complement component 8, alpha polypeptide [Source:MGI Symbol;Acc:MGI:2668347]	NA	NA	NA	ENSMUSG00000035031
ENSMUSG00000087163	1.64866	-1.59321	1.11327	-1.43111	0.152398	1	ENSMUSG00000087163	NA	Gm16230	10	127671604	127676724	-1	antisense_RNA	predicted gene 16230 [Source:MGI Symbol;Acc:MGI:3802022]	NA	NA	NA	ENSMUSG00000087163
ENSMUSG00000084128	3.25793	-1.59318	1.20942	-1.31731	0.187735	1	ENSMUSG00000084128	77411	Esrp2	8	106130319	106136974	-1	protein_coding	epithelial splicing regulatory protein 2 [Source:MGI Symbol;Acc:MGI:1924661]	ribosomal protein(PC00202)	NA	NA	ENSMUSG00000084128
ENSMUSG00000084817	3.00142	-1.58869	1.67811	-0.946716	0.343784	1	ENSMUSG00000084817	NA	Gm5526	1	45857332	45857754	-1	processed_pseudogene	predicted pseudogene 5526 [Source:MGI Symbol;Acc:MGI:3643066]	NA	NA	NA	ENSMUSG00000084817
ENSMUSG00000097530	182.46	-1.58274	1.01878	-1.55356	0.120288	1	ENSMUSG00000097530	NA	Kansl2-ps	7	72672818	72674278	1	processed_pseudogene	KAT8 regulatory NSL complex subunit 2, pseudogene [Source:MGI Symbol;Acc:MGI:3648525]	NA	NA	NA	ENSMUSG00000097530
ENSMUSG00000035951	0.932067	-1.57538	1.27962	-1.23114	0.218272	1	ENSMUSG00000035951	56787	Ascl3	7	109727465	109731726	-1	protein_coding	achaete-scute family bHLH transcription factor 3 [Source:MGI Symbol;Acc:MGI:1928820]	basic helix-loop-helix transcription factor(PC00055)	nucleic acid binding(PC00171)	NA	ENSMUSG00000035951
ENSMUSG00000084033	10.8644	-1.57408	1.00998	-1.55852	0.119109	1	ENSMUSG00000084033	NA	Gm7645	2	181292148	181292935	1	processed_pseudogene	predicted gene 7645 [Source:MGI Symbol;Acc:MGI:3646877]	NA	NA	NA	ENSMUSG00000084033
ENSMUSG00000095761	4.24673	-1.56839	1.32251	-1.18592	NA	NA	ENSMUSG00000095761	NA	Ighv1-20	12	114723772	114724205	-1	IG_V_gene	immunoglobulin heavy variable V1-20 [Source:MGI Symbol;Acc:MGI:3644607]	NA	NA	NA	ENSMUSG00000095761
ENSMUSG00000039084	0.573517	-1.5671	1.60272	-0.977772	0.328187	NA	ENSMUSG00000039084	12643	Chad	11	94565047	94569127	1	protein_coding	chondroadherin [Source:MGI Symbol;Acc:MGI:1096866]	extracellular matrix protein(PC00102)	receptor(PC00197)	NA	ENSMUSG00000039084
ENSMUSG00000073067	0.761396	-1.56607	2.22288	-0.704523	0.481107	NA	ENSMUSG00000073067	NA	9130019P16Rik	6	54269681	54430221	-1	processed_transcript	RIKEN cDNA 9130019P16 gene [Source:MGI Symbol;Acc:MGI:1918824]	NA	NA	NA	ENSMUSG00000073067
ENSMUSG00000095538	3.65403	-1.56089	1.9739	-0.790762	0.429083	1	ENSMUSG00000095538	NA	Gm21983	7	27168430	27181086	-1	protein_coding	predicted gene 21983 [Source:MGI Symbol;Acc:MGI:5439452]	NA	NA	NA	ENSMUSG00000095538
ENSMUSG00000108841	0.813022	-1.5596	1.47711	-1.05585	0.291038	NA	ENSMUSG00000108841	268729	Frmpd2	14	33471696	33575269	1	protein_coding	FERM and PDZ domain containing 2 [Source:MGI Symbol;Acc:MGI:2685472]	NA	NA	NA	ENSMUSG00000108841
ENSMUSG00000115188	3.63344	-1.55067	0.995898	-1.55705	0.119457	1	ENSMUSG00000115188	NA	NA	NA	NA	NA	NA	NA	NA	NA	NA	NA	ENSMUSG00000115188
ENSMUSG00000100147	0.478832	-1.55062	2.8106	-0.551705	0.58115	NA	ENSMUSG00000100147	NA	1700047M11Rik	1	182287990	182303325	1	lincRNA	RIKEN cDNA 1700047M11 gene [Source:MGI Symbol;Acc:MGI:1914580]	NA	NA	NA	ENSMUSG00000100147
ENSMUSG00000100253	0.963969	-1.55057	1.0798	-1.43598	0.151007	1	ENSMUSG00000100253	NA	1700020N18Rik	1	91404879	91406029	-1	lincRNA	RIKEN cDNA 1700020N18 gene [Source:MGI Symbol;Acc:MGI:1914336]	NA	NA	NA	ENSMUSG00000100253
ENSMUSG00000036856	2.21616	-1.55011	1.10083	-1.40812	0.159095	1	ENSMUSG00000036856	22417	Wnt4	4	137277489	137299726	1	protein_coding	wingless-type MMTV integration site family, member 4 [Source:MGI Symbol;Acc:MGI:98957]	signaling molecule(PC00207)	NA	NA	ENSMUSG00000036856
ENSMUSG00000113411	0.188664	-1.54618	5.48257	-0.282018	0.77793	NA	ENSMUSG00000113411	NA	AC134254.4	12	19865126	19865495	-1	processed_pseudogene		NA	NA	NA	ENSMUSG00000113411
ENSMUSG00000089978	0.544926	-1.54563	2.0328	-0.760345	0.447048	NA	ENSMUSG00000089978	NA	Crb1-ps	14	26375278	26376172	-1	processed_pseudogene	crumbs family member 1, photoreceptor morphogenesis associated, pseudogene [Source:MGI Symbol;Acc:MGI:5645790]	NA	NA	NA	ENSMUSG00000089978
ENSMUSG00000091228	10.6671	-1.5444	3.18331	-0.485156	0.627566	1	ENSMUSG00000091228	NA	Gm20390	11	93949819	93968293	-1	protein_coding	predicted gene 20390 [Source:MGI Symbol;Acc:MGI:5141855]	NA	NA	NA	ENSMUSG00000091228
ENSMUSG00000087662	1.85053	-1.54438	0.836271	-1.84675	0.0647833	1	ENSMUSG00000087662	NA	Gm11373	13	31325934	31330767	-1	lincRNA	predicted gene 11373 [Source:MGI Symbol;Acc:MGI:3651828]	NA	NA	NA	ENSMUSG00000087662
ENSMUSG00000117179	0.254709	-1.54425	3.47527	-0.444354	0.656787	NA	ENSMUSG00000117179	NA	NA	NA	NA	NA	NA	NA	NA	NA	NA	NA	ENSMUSG00000117179
ENSMUSG00000110599	0.16125	-1.54212	5.48268	-0.281272	0.778502	NA	ENSMUSG00000110599	NA	6030466F02Rik	8	123733958	123739941	1	lincRNA	RIKEN cDNA 6030466F02 gene [Source:MGI Symbol;Acc:MGI:3045390]	NA	NA	NA	ENSMUSG00000110599
ENSMUSG00000080814	0.219352	-1.54111	4.17754	-0.368902	0.7122	NA	ENSMUSG00000080814	NA	Gm12314	11	70429017	70429554	-1	processed_pseudogene	predicted gene 12314 [Source:MGI Symbol;Acc:MGI:3649316]	NA	NA	NA	ENSMUSG00000080814
ENSMUSG00000082762	6.24899	-1.5384	1.30817	-1.17599	0.239597	1	ENSMUSG00000082762	NA	Gm12366	4	35202103	35202975	-1	processed_pseudogene	predicted gene 12366 [Source:MGI Symbol;Acc:MGI:3649557]	NA	NA	NA	ENSMUSG00000082762
ENSMUSG00000018411	6.34435	-1.53812	0.905271	-1.69908	0.0893048	1	ENSMUSG00000018411	17762	Mapt	11	104231390	104332090	1	protein_coding	microtubule-associated protein tau [Source:MGI Symbol;Acc:MGI:97180]	NA	NA	NA	ENSMUSG00000018411
ENSMUSG00000113346	0.253986	-1.53557	4.1295	-0.371854	0.710002	NA	ENSMUSG00000113346	NA	AC154266.1	13	73344667	73347384	-1	lincRNA		NA	NA	NA	ENSMUSG00000113346
ENSMUSG00000029608	0.227205	-1.53552	4.15101	-0.369914	0.711446	NA	ENSMUSG00000029608	19894	Rph3a	5	120940499	121010092	-1	protein_coding	rabphilin 3A [Source:MGI Symbol;Acc:MGI:102788]	NA	NA	NA	ENSMUSG00000029608
ENSMUSG00000097045	0.288626	-1.53488	3.45047	-0.444831	0.656442	NA	ENSMUSG00000097045	NA	Gm26641	1	171423185	171437318	-1	lincRNA	predicted gene, 26641 [Source:MGI Symbol;Acc:MGI:5477135]	NA	NA	NA	ENSMUSG00000097045
ENSMUSG00000073896	0.340758	-1.5345	2.27823	-0.673552	0.500596	NA	ENSMUSG00000073896	258597	Olfr716	7	107138327	107150581	1	protein_coding	olfactory receptor 716 [Source:MGI Symbol;Acc:MGI:3030550]	NA	NA	NA	ENSMUSG00000073896
ENSMUSG00000020878	1.03914	-1.53382	1.12345	-1.36528	0.172165	1	ENSMUSG00000020878	69297	Lrrc46	11	97034602	97041407	-1	protein_coding	leucine rich repeat containing 46 [Source:MGI Symbol;Acc:MGI:1916547]	NA	NA	NA	ENSMUSG00000020878
ENSMUSG00000101964	7.94054	-1.53331	1.24018	-1.23636	0.216323	1	ENSMUSG00000101964	NA	Gm28693	1	156835287	156837924	-1	transcribed_processed_pseudogene	predicted gene 28693 [Source:MGI Symbol;Acc:MGI:5579399]	NA	NA	NA	ENSMUSG00000101964
ENSMUSG00000091685	0.418544	-1.53322	2.90634	-0.527541	0.597818	NA	ENSMUSG00000091685	100233207	Gm17359	3	79336661	79464129	1	protein_coding	predicted gene, 17359 [Source:MGI Symbol;Acc:MGI:4936993]	NA	NA	NA	ENSMUSG00000091685
ENSMUSG00000032503	2.2148	-1.53275	0.976763	-1.56921	0.116599	1	ENSMUSG00000032503	74100	Arpp21	9	112065091	112235938	-1	protein_coding	cyclic AMP-regulated phosphoprotein, 21 [Source:MGI Symbol;Acc:MGI:107562]	NA	NA	NA	ENSMUSG00000032503
ENSMUSG00000039330	0.221769	-1.53135	4.18851	-0.365607	0.714658	NA	ENSMUSG00000039330	NA	Tsga10ip	19	5390049	5394401	-1	protein_coding	testis specific 10 interacting protein [Source:MGI Symbol;Acc:MGI:1925556]	NA	NA	NA	ENSMUSG00000039330
ENSMUSG00000067882	0.190327	-1.5312	4.24405	-0.360787	0.718259	NA	ENSMUSG00000067882	NA	Casp16-ps	17	23550965	23553566	-1	polymorphic_pseudogene	caspase 16, apoptosis-related cysteine peptidase, pseudogene [Source:MGI Symbol;Acc:MGI:3646305]	cysteine protease(PC00081)	protease inhibitor(PC00191)	NA	ENSMUSG00000067882
ENSMUSG00000093452	0.638176	-1.53053	3.41262	-0.448491	0.653799	NA	ENSMUSG00000093452	NA	Zfhx2os	14	55073091	55075874	1	antisense_RNA	zinc finger homeobox 2, opposite strand [Source:MGI Symbol;Acc:MGI:3620246]	NA	NA	NA	ENSMUSG00000093452
ENSMUSG00000066478	0.386335	-1.53045	2.30973	-0.662611	0.507579	NA	ENSMUSG00000066478	NA	Gm5745	9	73175429	73175741	-1	processed_pseudogene	predicted gene 5745 [Source:MGI Symbol;Acc:MGI:3645343]	NA	NA	NA	ENSMUSG00000066478
ENSMUSG00000104869	0.308289	-1.53024	3.47788	-0.439993	0.659943	NA	ENSMUSG00000104869	NA	Gm42544	3	122023830	122027071	1	TEC	predicted gene 42544 [Source:MGI Symbol;Acc:MGI:5662681]	NA	NA	NA	ENSMUSG00000104869
ENSMUSG00000051113	17.6135	-1.53014	0.798671	-1.91585	0.0553837	1	ENSMUSG00000051113	75538	Fam71e1	7	44496581	44501486	1	protein_coding	family with sequence similarity 71, member E1 [Source:MGI Symbol;Acc:MGI:1922788]	NA	NA	NA	ENSMUSG00000051113
ENSMUSG00000116239	0.286103	-1.52987	3.44945	-0.443512	0.657396	NA	ENSMUSG00000116239	NA	NA	NA	NA	NA	NA	NA	NA	NA	NA	NA	ENSMUSG00000116239
ENSMUSG00000110917	0.259049	-1.52922	2.93694	-0.520687	0.602585	NA	ENSMUSG00000110917	NA	AC161825.1	10	19290989	19325817	1	lincRNA		NA	NA	NA	ENSMUSG00000110917
ENSMUSG00000114197	0.338826	-1.52846	2.04221	-0.748434	0.454199	NA	ENSMUSG00000114197	NA	AC154634.1	14	15063032	15065425	1	TEC		NA	NA	NA	ENSMUSG00000114197
ENSMUSG00000062296	0.523423	-1.52792	3.33591	-0.458021	0.646937	NA	ENSMUSG00000062296	320429	Trank1	9	111311739	111395775	1	protein_coding	tetratricopeptide repeat and ankyrin repeat containing 1 [Source:MGI Symbol;Acc:MGI:1341834]	NA	NA	NA	ENSMUSG00000062296
ENSMUSG00000116665	0.0826501	-1.52779	5.5071	-0.277422	0.781456	NA	ENSMUSG00000116665	NA	NA	NA	NA	NA	NA	NA	NA	NA	NA	NA	ENSMUSG00000116665
ENSMUSG00000021620	0.299981	-1.52773	5.5071	-0.277411	0.781465	NA	ENSMUSG00000021620	74156	Acot12	13	91741512	91786148	1	protein_coding	acyl-CoA thioesterase 12 [Source:MGI Symbol;Acc:MGI:1921406]	esterase(PC00097)	NA	NA	ENSMUSG00000021620
ENSMUSG00000110905	0.260415	-1.52572	3.45997	-0.440963	0.659239	NA	ENSMUSG00000110905	NA	AC107851.1	9	115680743	115682263	1	lincRNA		NA	NA	NA	ENSMUSG00000110905
ENSMUSG00000002459	0.502931	-1.52561	2.08682	-0.73107	0.464736	NA	ENSMUSG00000002459	58175	Rgs20	1	4909576	5070285	-1	protein_coding	regulator of G-protein signaling 20 [Source:MGI Symbol;Acc:MGI:1929866]	G-protein modulator(PC00022)	NA	NA	ENSMUSG00000002459
ENSMUSG00000085652	0.465583	-1.52431	1.93414	-0.788109	0.430633	NA	ENSMUSG00000085652	NA	Gm11999	11	11642203	11685400	-1	processed_transcript	predicted gene 11999 [Source:MGI Symbol;Acc:MGI:3650903]	NA	NA	NA	ENSMUSG00000085652
ENSMUSG00000102830	0.434503	-1.52379	1.91831	-0.794341	0.426997	NA	ENSMUSG00000102830	NA	Gm37012	9	87188336	87189413	-1	TEC	predicted gene, 37012 [Source:MGI Symbol;Acc:MGI:5610240]	NA	NA	NA	ENSMUSG00000102830
ENSMUSG00000037159	0.220355	-1.52368	5.13587	-0.296674	0.766715	NA	ENSMUSG00000037159	381759	Wee2	6	40439088	40466813	1	protein_coding	WEE1 homolog 2 (S. pombe) [Source:MGI Symbol;Acc:MGI:3027899]	non-receptor serine/threonine protein kinase(PC00167)	NA	NA	ENSMUSG00000037159
ENSMUSG00000104891	2.68716	-1.52285	0.841933	-1.80876	0.0704885	1	ENSMUSG00000104891	NA	2510017J16Rik	5	3585112	3586374	1	antisense_RNA	RIKEN cDNA 2510017J16 gene [Source:MGI Symbol;Acc:MGI:1913824]	NA	NA	NA	ENSMUSG00000104891
ENSMUSG00000094842	0.142133	-1.52249	5.50728	-0.27645	0.782202	NA	ENSMUSG00000094842	NA	Gm22639	4	44865307	44865431	1	miRNA	predicted gene, 22639 [Source:MGI Symbol;Acc:MGI:5452416]	NA	NA	NA	ENSMUSG00000094842
ENSMUSG00000114092	0.187107	-1.52194	5.22205	-0.291445	0.770711	NA	ENSMUSG00000114092	NA	AC154248.2	13	63794106	63795428	1	lincRNA		NA	NA	NA	ENSMUSG00000114092
ENSMUSG00000062461	1.42213	-1.52189	1.75826	-0.865563	0.38673	1	ENSMUSG00000062461	NA	Gm5453	13	98904224	98904670	1	processed_pseudogene	predicted gene 5453 [Source:MGI Symbol;Acc:MGI:3648523]	NA	NA	NA	ENSMUSG00000062461
ENSMUSG00000085351	0.0821674	-1.52118	5.50733	-0.27621	0.782387	NA	ENSMUSG00000085351	NA	Gm12472	4	43588072	43608755	1	antisense_RNA	predicted gene 12472 [Source:MGI Symbol;Acc:MGI:3649439]	NA	NA	NA	ENSMUSG00000085351
ENSMUSG00000103391	0.418368	-1.52111	2.09509	-0.726036	0.467817	NA	ENSMUSG00000103391	NA	Gm38302	1	160604115	160606190	-1	TEC	predicted gene, 38302 [Source:MGI Symbol;Acc:MGI:5611530]	NA	NA	NA	ENSMUSG00000103391
ENSMUSG00000082849	0.529146	-1.52074	1.58907	-0.956998	0.338568	NA	ENSMUSG00000082849	NA	Gm14053	2	136744146	136744615	-1	processed_pseudogene	predicted gene 14053 [Source:MGI Symbol;Acc:MGI:3651943]	NA	NA	NA	ENSMUSG00000082849
ENSMUSG00000052581	0.0813276	-1.52056	5.50735	-0.276097	0.782474	NA	ENSMUSG00000052581	243499	Lrrtm4	6	80018877	80810143	1	protein_coding	leucine rich repeat transmembrane neuronal 4 [Source:MGI Symbol;Acc:MGI:2389180]	extracellular matrix protein(PC00102)	receptor(PC00197)	NA	ENSMUSG00000052581
ENSMUSG00000096215	0.0813276	-1.52056	5.50735	-0.276097	0.782474	NA	ENSMUSG00000096215	432995	Smim22	16	5007288	5008309	1	protein_coding	small integral membrane protein 22 [Source:MGI Symbol;Acc:MGI:3643379]	NA	NA	NA	ENSMUSG00000096215
ENSMUSG00000114317	0.0813276	-1.52056	5.50735	-0.276097	0.782474	NA	ENSMUSG00000114317	NA	AC133517.1	14	43089445	43109217	1	transcribed_processed_pseudogene		NA	NA	NA	ENSMUSG00000114317
ENSMUSG00000102063	0.115474	-1.52033	5.50736	-0.276054	0.782506	NA	ENSMUSG00000102063	NA	Gm28706	1	125444567	125447398	1	lincRNA	predicted gene 28706 [Source:MGI Symbol;Acc:MGI:5579412]	NA	NA	NA	ENSMUSG00000102063
ENSMUSG00000091594	0.110975	-1.52033	5.50736	-0.276054	0.782506	NA	ENSMUSG00000091594	100045125	Gm17067	7	42705469	42727017	-1	protein_coding	predicted gene 17067 [Source:MGI Symbol;Acc:MGI:4937894]	NA	NA	NA	ENSMUSG00000091594
ENSMUSG00000102656	0.108386	-1.52033	5.50736	-0.276054	0.782506	NA	ENSMUSG00000102656	NA	Ighv1-32	12	114835223	114835656	-1	IG_V_pseudogene	immunoglobulin heavy variable V1-32 [Source:MGI Symbol;Acc:MGI:5009910]	NA	NA	NA	ENSMUSG00000102656
ENSMUSG00000113989	0.11101	-1.52033	5.50736	-0.276054	0.782507	NA	ENSMUSG00000113989	NA	AC159619.4	12	42088439	42115803	1	lincRNA		NA	NA	NA	ENSMUSG00000113989
ENSMUSG00000089105	0.240321	-1.52024	5.08196	-0.299145	0.764829	NA	ENSMUSG00000089105	NA	Gm23115	17	71506436	71506543	-1	rRNA	predicted gene, 23115 [Source:MGI Symbol;Acc:MGI:5452892]	NA	NA	NA	ENSMUSG00000089105
ENSMUSG00000115667	2.67701	-1.52019	0.772332	-1.96831	0.0490324	1	ENSMUSG00000115667	NA	NA	NA	NA	NA	NA	NA	NA	NA	NA	NA	ENSMUSG00000115667
ENSMUSG00000081176	0.491857	-1.51997	4.80564	-0.316289	0.751783	NA	ENSMUSG00000081176	NA	H3f3a-ps2	16	91114189	91114599	-1	processed_pseudogene	H3 histone, family 3A, pseudogene 2 [Source:MGI Symbol;Acc:MGI:1101758]	NA	NA	NA	ENSMUSG00000081176
ENSMUSG00000102890	0.117796	-1.51934	5.5074	-0.275873	0.782646	NA	ENSMUSG00000102890	NA	Gm7626	1	166043339	166043691	-1	processed_pseudogene	predicted gene 7626 [Source:MGI Symbol;Acc:MGI:3647116]	NA	NA	NA	ENSMUSG00000102890
ENSMUSG00000098759	0.156116	-1.51933	5.5074	-0.275871	0.782647	NA	ENSMUSG00000098759	NA	Mir7063	7	141620701	141620791	1	miRNA	microRNA 7063 [Source:MGI Symbol;Acc:MGI:5531036]	NA	NA	NA	ENSMUSG00000098759
ENSMUSG00000103015	0.17639	-1.51931	5.29563	-0.286898	0.77419	NA	ENSMUSG00000103015	NA	Gm37549	17	84012992	84017056	-1	TEC	predicted gene, 37549 [Source:MGI Symbol;Acc:MGI:5610777]	NA	NA	NA	ENSMUSG00000103015
ENSMUSG00000082417	0.434311	-1.5193	3.98799	-0.380969	0.703226	NA	ENSMUSG00000082417	NA	Gm13740	2	87546893	87547202	-1	processed_pseudogene	predicted gene 13740 [Source:MGI Symbol;Acc:MGI:3649209]	NA	NA	NA	ENSMUSG00000082417
ENSMUSG00000085715	0.295493	-1.51918	4.08871	-0.371555	0.710224	NA	ENSMUSG00000085715	NA	Tsix	X	103431517	103484957	1	antisense_RNA	X (inactive)-specific transcript, opposite strand [Source:MGI Symbol;Acc:MGI:1336196]	NA	NA	NA	ENSMUSG00000085715
ENSMUSG00000103260	0.265117	-1.51902	5.0217	-0.302492	0.762277	NA	ENSMUSG00000103260	NA	Gm8146	1	181282046	181283892	1	processed_pseudogene	predicted gene 8146 [Source:MGI Symbol;Acc:MGI:3644273]	NA	NA	NA	ENSMUSG00000103260
ENSMUSG00000030092	0.081202	-1.51876	5.50742	-0.275767	0.782727	NA	ENSMUSG00000030092	53870	Cntn6	6	104492790	104863406	1	protein_coding	contactin 6 [Source:MGI Symbol;Acc:MGI:1858223]	transmembrane receptor regulatory/adaptor protein(PC00226)	NA	NA	ENSMUSG00000030092
ENSMUSG00000055415	0.081202	-1.51876	5.50742	-0.275767	0.782727	NA	ENSMUSG00000055415	319767	Atp10b	11	43149877	43262285	1	protein_coding	ATPase, class V, type 10B [Source:MGI Symbol;Acc:MGI:2442688]	cation transporter(PC00068)	hydrolase(PC00121)	NA	ENSMUSG00000055415
ENSMUSG00000100446	0.081202	-1.51876	5.50742	-0.275767	0.782727	NA	ENSMUSG00000100446	NA	Gm28242	Y	4586871	4590103	1	lincRNA	predicted gene 28242 [Source:MGI Symbol;Acc:MGI:5578948]	NA	NA	NA	ENSMUSG00000100446
ENSMUSG00000103989	0.081202	-1.51876	5.50742	-0.275767	0.782727	NA	ENSMUSG00000103989	NA	Ighv5-21	12	114320030	114320324	-1	IG_V_pseudogene	immunoglobulin heavy variable V5-21 [Source:MGI Symbol;Acc:MGI:5009899]	NA	NA	NA	ENSMUSG00000103989
ENSMUSG00000091900	0.142308	-1.51874	5.50742	-0.275763	0.78273	NA	ENSMUSG00000091900	NA	Gm4353	7	116082863	116084635	-1	protein_coding	predicted gene 4353 [Source:MGI Symbol;Acc:MGI:3782538]	NA	NA	NA	ENSMUSG00000091900
ENSMUSG00000084013	0.402934	-1.51871	5.50742	-0.275756	0.782735	NA	ENSMUSG00000084013	NA	Gm14270	2	170285035	170285880	1	processed_pseudogene	predicted gene 14270 [Source:MGI Symbol;Acc:MGI:3649849]	NA	NA	NA	ENSMUSG00000084013
ENSMUSG00000093898	0.470356	-1.51868	5.50742	-0.275752	0.782739	NA	ENSMUSG00000093898	NA	Gm3629	14	6583959	6590613	-1	protein_coding	predicted gene 3629 [Source:MGI Symbol;Acc:MGI:3781805]	NA	NA	NA	ENSMUSG00000093898
ENSMUSG00000092360	0.589423	-1.51864	5.50741	-0.275745	0.782744	NA	ENSMUSG00000092360	NA	Gm20441	10	75771451	75780954	-1	protein_coding	predicted gene 20441 [Source:MGI Symbol;Acc:MGI:5141906]	NA	NA	NA	ENSMUSG00000092360
ENSMUSG00000113245	0.236634	-1.5186	4.17662	-0.363595	0.71616	NA	ENSMUSG00000113245	NA	AC124732.1	13	8884914	8885823	-1	TEC		NA	NA	NA	ENSMUSG00000113245
ENSMUSG00000050211	0.269286	-1.51847	4.12373	-0.368228	0.712703	NA	ENSMUSG00000050211	329502	Pla2g4e	2	120166412	120245335	-1	protein_coding	phospholipase A2, group IVE [Source:MGI Symbol;Acc:MGI:1919144]	phospholipase(PC00186)	NA	NA	ENSMUSG00000050211
ENSMUSG00000076525	9.25613	-1.51832	0.998145	-1.52115	0.128223	1	ENSMUSG00000076525	NA	Igkv1-99	6	68541644	68542422	1	IG_V_gene	immunoglobulin kappa variable 1-99 [Source:MGI Symbol;Acc:MGI:4439724]	immunoglobulin(PC00123)	NA	NA	ENSMUSG00000076525
ENSMUSG00000112249	0.46404	-1.51816	2.06936	-0.73364	0.463168	NA	ENSMUSG00000112249	NA	AC158595.1	10	111599177	111611338	1	lincRNA		NA	NA	NA	ENSMUSG00000112249
ENSMUSG00000070896	0.707238	-1.51729	1.98384	-0.764824	0.444376	NA	ENSMUSG00000070896	NA	Rpl23a-ps1	1	45981548	45982012	1	processed_pseudogene	ribosomal protein 23A, pseudogene 1 [Source:MGI Symbol;Acc:MGI:3646201]	NA	NA	NA	ENSMUSG00000070896
ENSMUSG00000097764	0.222174	-1.5167	3.48386	-0.435352	0.663307	NA	ENSMUSG00000097764	NA	Gm26635	16	17254960	17260326	-1	lincRNA	predicted gene, 26635 [Source:MGI Symbol;Acc:MGI:5477129]	NA	NA	NA	ENSMUSG00000097764
ENSMUSG00000110554	0.271224	-1.51657	3.49882	-0.433453	0.664685	NA	ENSMUSG00000110554	NA	Gm35256	8	71026792	71126576	1	lincRNA	predicted gene, 35256 [Source:MGI Symbol;Acc:MGI:5594415]	NA	NA	NA	ENSMUSG00000110554
ENSMUSG00000109857	1.51425	-1.51629	1.68006	-0.902517	0.366782	1	ENSMUSG00000109857	NA	Gm32817	16	13462546	13467237	1	processed_transcript	predicted gene, 32817 [Source:MGI Symbol;Acc:MGI:5591976]	NA	NA	NA	ENSMUSG00000109857
ENSMUSG00000037708	1.30885	-1.51513	1.37482	-1.10205	0.27044	1	ENSMUSG00000037708	381350	Spag6	2	18694032	18750413	1	protein_coding	sperm associated antigen 6 [Source:MGI Symbol;Acc:MGI:3040687]	microtubule family cytoskeletal protein(PC00157)	NA	NA	ENSMUSG00000037708
ENSMUSG00000106385	0.358233	-1.51489	2.58123	-0.586885	0.557281	NA	ENSMUSG00000106385	NA	Gm42943	3	156731098	156734339	1	TEC	predicted gene 42943 [Source:MGI Symbol;Acc:MGI:5663080]	NA	NA	NA	ENSMUSG00000106385
ENSMUSG00000103166	1.1285	-1.51449	1.54731	-0.978785	0.327686	1	ENSMUSG00000103166	NA	Gm10537	1	133829528	133831225	1	TEC	predicted gene 10537 [Source:MGI Symbol;Acc:MGI:3642691]	NA	NA	NA	ENSMUSG00000103166
ENSMUSG00000115537	0.391141	-1.5139	3.02813	-0.499945	0.617114	NA	ENSMUSG00000115537	NA	NA	NA	NA	NA	NA	NA	NA	NA	NA	NA	ENSMUSG00000115537
ENSMUSG00000020469	0.473991	-1.51367	1.97323	-0.767105	0.443019	NA	ENSMUSG00000020469	17898	Myl7	11	5896637	5898782	-1	protein_coding	myosin, light polypeptide 7, regulatory [Source:MGI Symbol;Acc:MGI:107495]	actin family cytoskeletal protein(PC00041)	calmodulin(PC00061)	NA	ENSMUSG00000020469
ENSMUSG00000117228	0.498002	-1.51335	1.97215	-0.76736	0.442867	NA	ENSMUSG00000117228	NA	NA	NA	NA	NA	NA	NA	NA	NA	NA	NA	ENSMUSG00000117228
ENSMUSG00000039470	166.784	-1.51263	0.511675	-2.95623	0.00311427	0.814196	ENSMUSG00000039470	70546	Zdhhc2	8	40423815	40510268	1	protein_coding	zinc finger, DHHC domain containing 2 [Source:MGI Symbol;Acc:MGI:1923452]	NA	NA	NA	ENSMUSG00000039470
ENSMUSG00000026943	0.156929	-1.51262	5.37541	-0.281397	0.778406	NA	ENSMUSG00000026943	77701	Lcn12	2	25490845	25493911	-1	protein_coding	lipocalin 12 [Source:MGI Symbol;Acc:MGI:1924951]	isomerase(PC00135)	transfer/carrier protein(PC00219)	NA	ENSMUSG00000026943
ENSMUSG00000031618	37.9422	-1.51197	0.849145	-1.78058	0.0749814	1	ENSMUSG00000031618	110784	Nr3c2	8	76899442	77245012	1	protein_coding	nuclear receptor subfamily 3, group C, member 2 [Source:MGI Symbol;Acc:MGI:99459]	NA	NA	NA	ENSMUSG00000031618
ENSMUSG00000025777	0.309614	-1.51128	3.46043	-0.436732	0.662306	NA	ENSMUSG00000025777	14545	Gdap1	1	17145362	17164271	1	protein_coding	ganglioside-induced differentiation-associated-protein 1 [Source:MGI Symbol;Acc:MGI:1338002]	NA	NA	NA	ENSMUSG00000025777
ENSMUSG00000073233	0.709955	-1.51124	2.68923	-0.56196	0.574143	NA	ENSMUSG00000073233	NA	Gm9144	12	7859900	7860907	1	processed_pseudogene	predicted gene 9144 [Source:MGI Symbol;Acc:MGI:3643264]	NA	NA	NA	ENSMUSG00000073233
ENSMUSG00000083483	1.22781	-1.51113	1.47759	-1.0227	0.306451	1	ENSMUSG00000083483	NA	Gm14044	2	130384883	130385329	-1	processed_pseudogene	predicted gene 14044 [Source:MGI Symbol;Acc:MGI:3650452]	NA	NA	NA	ENSMUSG00000083483
ENSMUSG00000111665	0.317168	-1.51091	2.25502	-0.670019	0.502846	NA	ENSMUSG00000111665	NA	AC131684.1	10	40260934	40261333	1	lincRNA		NA	NA	NA	ENSMUSG00000111665
ENSMUSG00000109632	0.377685	-1.51059	2.29542	-0.658088	0.510482	NA	ENSMUSG00000109632	NA	Gm31479	7	45597140	45599569	1	lincRNA	predicted gene, 31479 [Source:MGI Symbol;Acc:MGI:5590638]	NA	NA	NA	ENSMUSG00000109632
ENSMUSG00000102514	0.357216	-1.51057	2.6148	-0.577699	0.563467	NA	ENSMUSG00000102514	NA	Gm35323	3	82577577	82578075	1	processed_pseudogene	predicted gene, 35323 [Source:MGI Symbol;Acc:MGI:5594482]	NA	NA	NA	ENSMUSG00000102514
ENSMUSG00000105928	0.0807284	-1.51045	5.5076	-0.274249	0.783893	NA	ENSMUSG00000105928	NA	Gm9256	12	115892884	115894303	1	processed_pseudogene	predicted gene 9256 [Source:MGI Symbol;Acc:MGI:3648981]	NA	NA	NA	ENSMUSG00000105928
ENSMUSG00000114388	0.0812111	-1.51045	5.5076	-0.274249	0.783893	NA	ENSMUSG00000114388	NA	AC158538.2	13	41176888	41179030	1	lincRNA		NA	NA	NA	ENSMUSG00000114388
ENSMUSG00000111363	0.118101	-1.51045	5.5076	-0.274247	0.783895	NA	ENSMUSG00000111363	NA	AC117195.1	9	79026940	79029752	-1	lincRNA		NA	NA	NA	ENSMUSG00000111363
ENSMUSG00000084823	0.112315	-1.51045	5.5076	-0.274247	0.783895	NA	ENSMUSG00000084823	NA	Gm17216	6	148213367	148214573	-1	lincRNA	predicted gene 17216 [Source:MGI Symbol;Acc:MGI:4938043]	NA	NA	NA	ENSMUSG00000084823
ENSMUSG00000101630	0.140224	-1.51044	5.5076	-0.274246	0.783896	NA	ENSMUSG00000101630	NA	Gm29261	19	59259512	59261419	-1	antisense_RNA	predicted gene 29261 [Source:MGI Symbol;Acc:MGI:5579967]	NA	NA	NA	ENSMUSG00000101630
ENSMUSG00000112734	0.140774	-1.51044	5.50718	-0.274267	0.78388	NA	ENSMUSG00000112734	NA	AC153524.4	10	53337753	53345085	-1	sense_intronic		NA	NA	NA	ENSMUSG00000112734
ENSMUSG00000106121	0.14002	-1.51044	5.5076	-0.274245	0.783896	NA	ENSMUSG00000106121	NA	Gm42679	3	102491342	102494247	1	sense_intronic	predicted gene 42679 [Source:MGI Symbol;Acc:MGI:5662816]	NA	NA	NA	ENSMUSG00000106121
ENSMUSG00000030800	0.198847	-1.51024	5.20744	-0.290016	0.771804	NA	ENSMUSG00000030800	76560	Prss8	7	127925716	127930104	-1	protein_coding	protease, serine 8 (prostasin) [Source:MGI Symbol;Acc:MGI:1923810]	NA	NA	NA	ENSMUSG00000030800
ENSMUSG00000105672	0.170317	-1.5095	4.34253	-0.347607	0.728135	NA	ENSMUSG00000105672	NA	Gm42816	3	102830494	102830818	1	unprocessed_pseudogene	predicted gene 42816 [Source:MGI Symbol;Acc:MGI:5662953]	NA	NA	NA	ENSMUSG00000105672
ENSMUSG00000082487	0.203706	-1.50937	4.24302	-0.355731	0.722042	NA	ENSMUSG00000082487	NA	Gm11628	11	102492439	102492609	-1	processed_pseudogene	predicted gene 11628 [Source:MGI Symbol;Acc:MGI:3651276]	NA	NA	NA	ENSMUSG00000082487
ENSMUSG00000083482	1.14625	-1.5085	2.41911	-0.623576	0.532906	1	ENSMUSG00000083482	NA	Gm14706	X	76919856	76920110	-1	processed_pseudogene	predicted gene 14706 [Source:MGI Symbol;Acc:MGI:3646357]	NA	NA	NA	ENSMUSG00000083482
ENSMUSG00000064938	0.967502	-1.50848	1.45444	-1.03715	0.299664	1	ENSMUSG00000064938	NA	Mir3068	12	87437682	87437817	-1	snoRNA	microRNA 3068 [Source:MGI Symbol;Acc:MGI:4834241]	NA	NA	NA	ENSMUSG00000064938
ENSMUSG00000115133	0.204204	-1.50825	3.55238	-0.424574	0.671147	NA	ENSMUSG00000115133	NA	NA	NA	NA	NA	NA	NA	NA	NA	NA	NA	ENSMUSG00000115133
ENSMUSG00000091455	0.266087	-1.5081	3.48607	-0.432607	0.665301	NA	ENSMUSG00000091455	628870	Otogl	10	107760531	107912134	-1	protein_coding	otogelin-like [Source:MGI Symbol;Acc:MGI:3647600]	protease inhibitor(PC00191)	NA	NA	ENSMUSG00000091455
ENSMUSG00000068243	1.04515	-1.50805	1.4301	-1.0545	0.291652	1	ENSMUSG00000068243	NA	Gm7079	X	8047229	8047399	1	processed_pseudogene	predicted pseudogene 7079 [Source:MGI Symbol;Acc:MGI:3643105]	NA	NA	NA	ENSMUSG00000068243
ENSMUSG00000083856	0.395884	-1.50785	2.36093	-0.638666	0.52304	NA	ENSMUSG00000083856	NA	Gm13886	2	104820179	104821361	1	processed_pseudogene	predicted gene 13886 [Source:MGI Symbol;Acc:MGI:3649359]	NA	NA	NA	ENSMUSG00000083856
ENSMUSG00000113259	0.221474	-1.5078	4.16523	-0.361996	0.717355	NA	ENSMUSG00000113259	NA	AC132239.1	13	3762282	3766722	-1	lincRNA		NA	NA	NA	ENSMUSG00000113259
ENSMUSG00000113403	1.02806	-1.50742	1.39568	-1.08006	0.280115	1	ENSMUSG00000113403	NA	AC153663.1	12	24382254	24383161	-1	processed_pseudogene		NA	NA	NA	ENSMUSG00000113403
ENSMUSG00000096167	0.328243	-1.50715	2.30379	-0.654203	0.512981	NA	ENSMUSG00000096167	258415	Olfr887	9	38084072	38090737	1	protein_coding	olfactory receptor 887 [Source:MGI Symbol;Acc:MGI:3030721]	NA	NA	NA	ENSMUSG00000096167
ENSMUSG00000085378	0.231817	-1.50676	3.00628	-0.501203	0.616228	NA	ENSMUSG00000085378	NA	Gm11415	4	83884738	83888858	-1	lincRNA	predicted gene 11415 [Source:MGI Symbol;Acc:MGI:3650502]	NA	NA	NA	ENSMUSG00000085378
ENSMUSG00000102749	0.292092	-1.50671	2.99485	-0.503101	0.614893	NA	ENSMUSG00000102749	NA	Gm37598	1	177074484	177075784	-1	TEC	predicted gene, 37598 [Source:MGI Symbol;Acc:MGI:5610826]	NA	NA	NA	ENSMUSG00000102749
ENSMUSG00000097182	0.449669	-1.50634	2.1019	-0.71666	0.473584	NA	ENSMUSG00000097182	NA	A830009L08Rik	13	91368990	91388085	-1	lincRNA	RIKEN cDNA A830009L08 gene [Source:MGI Symbol;Acc:MGI:2443762]	NA	NA	NA	ENSMUSG00000097182
ENSMUSG00000082116	0.525793	-1.50606	1.69148	-0.890381	0.373262	NA	ENSMUSG00000082116	NA	Gm12188	11	49088234	49088543	-1	processed_pseudogene	predicted gene 12188 [Source:MGI Symbol;Acc:MGI:3651945]	NA	NA	NA	ENSMUSG00000082116
ENSMUSG00000092229	0.570906	-1.5056	2.18802	-0.688113	0.491382	NA	ENSMUSG00000092229	NA	Gm5977	12	21042959	21048281	1	transcribed_unprocessed_pseudogene	predicted gene 5977 [Source:MGI Symbol;Acc:MGI:3779541]	NA	NA	NA	ENSMUSG00000092229
ENSMUSG00000112860	0.376065	-1.50536	2.4384	-0.617356	0.537	NA	ENSMUSG00000112860	NA	AC122317.2	12	98259060	98260307	1	antisense_RNA		NA	NA	NA	ENSMUSG00000112860
ENSMUSG00000110505	0.417702	-1.50528	2.6554	-0.566875	0.570799	NA	ENSMUSG00000110505	NA	Gm45842	8	123230799	123242160	1	antisense_RNA	predicted gene 45842 [Source:MGI Symbol;Acc:MGI:5804957]	NA	NA	NA	ENSMUSG00000110505
ENSMUSG00000075571	0.0807375	-1.50523	5.50771	-0.273295	0.784626	NA	ENSMUSG00000075571	73670	Defb30	14	63034087	63049960	-1	protein_coding	defensin beta 30 [Source:MGI Symbol;Acc:MGI:1920920]	NA	NA	NA	ENSMUSG00000075571
ENSMUSG00000065824	0.0802548	-1.50523	5.50771	-0.273295	0.784626	NA	ENSMUSG00000065824	NA	Gm26315	2	7076094	7076414	-1	misc_RNA	predicted gene, 26315 [Source:MGI Symbol;Acc:MGI:5456092]	NA	NA	NA	ENSMUSG00000065824
ENSMUSG00000105532	0.112023	-1.50522	5.50771	-0.273294	0.784628	NA	ENSMUSG00000105532	NA	Gm5279	3	107342955	107343699	1	processed_pseudogene	predicted gene 5279 [Source:MGI Symbol;Acc:MGI:3647225]	NA	NA	NA	ENSMUSG00000105532
ENSMUSG00000096557	0.312841	-1.50517	5.50771	-0.273284	0.784635	NA	ENSMUSG00000096557	NA	Gm7258	7	128595979	128596278	-1	processed_pseudogene	predicted gene 7258 [Source:MGI Symbol;Acc:MGI:3644893]	NA	NA	NA	ENSMUSG00000096557
ENSMUSG00000003051	0.171562	-1.50515	5.32309	-0.282759	0.777362	NA	ENSMUSG00000003051	13710	Elf3	1	135253575	135258568	-1	protein_coding	E74-like factor 3 [Source:MGI Symbol;Acc:MGI:1101781]	nucleic acid binding(PC00171)	signaling molecule(PC00207)	winged helix/forkhead transcription factor(PC00246)	ENSMUSG00000003051
ENSMUSG00000031665	0.204968	-1.50509	5.16932	-0.291158	0.77093	NA	ENSMUSG00000031665	58198	Sall1	8	89027235	89044162	-1	protein_coding	sal-like 1 (Drosophila) [Source:MGI Symbol;Acc:MGI:1889585]	NA	NA	NA	ENSMUSG00000031665
ENSMUSG00000048391	0.301931	-1.50503	2.60461	-0.577831	0.563378	NA	ENSMUSG00000048391	258560	Olfr843	9	19242956	19251987	-1	protein_coding	olfactory receptor 843 [Source:MGI Symbol;Acc:MGI:3030677]	NA	NA	NA	ENSMUSG00000048391
ENSMUSG00000114858	0.311783	-1.505	2.59932	-0.578997	0.562591	NA	ENSMUSG00000114858	NA	AC096628.2	13	47009533	47010945	-1	processed_pseudogene		NA	NA	NA	ENSMUSG00000114858
ENSMUSG00000099809	0.320297	-1.505	2.59946	-0.578966	0.562612	NA	ENSMUSG00000099809	NA	Gm18665	Y	1277313	1277582	-1	unprocessed_pseudogene	predicted gene, 18665 [Source:MGI Symbol;Acc:MGI:5010850]	NA	NA	NA	ENSMUSG00000099809
ENSMUSG00000082617	0.318366	-1.50492	2.58533	-0.5821	0.560499	NA	ENSMUSG00000082617	NA	Smt3h2-ps	X	7752130	7752414	1	processed_pseudogene	SMT3 suppressor of mif two 3 homolog 2, pseudogene (S. cerevisiae) [Source:MGI Symbol;Acc:MGI:1859622]	NA	NA	NA	ENSMUSG00000082617
ENSMUSG00000114519	1.3057	-1.5049	1.35639	-1.10949	0.26722	1	ENSMUSG00000114519	NA	AC161252.2	13	108220468	108220841	-1	processed_pseudogene		NA	NA	NA	ENSMUSG00000114519
ENSMUSG00000098056	1.45575	-1.50473	1.33644	-1.12592	0.2602	1	ENSMUSG00000098056	NA	Gm8100	8	28185840	28186827	1	processed_pseudogene	predicted gene 8100 [Source:MGI Symbol;Acc:MGI:3649005]	NA	NA	NA	ENSMUSG00000098056
ENSMUSG00000042200	0.220598	-1.50458	4.18574	-0.359454	0.719256	NA	ENSMUSG00000042200	66338	Cdrt4	11	62951193	62993095	1	protein_coding	CMT1A duplicated region transcript 4 [Source:MGI Symbol;Acc:MGI:1913588]	NA	NA	NA	ENSMUSG00000042200
ENSMUSG00000113908	0.678356	-1.50435	2.10193	-0.715697	0.474178	NA	ENSMUSG00000113908	NA	CT030187.8	13	13168730	13171177	-1	TEC		NA	NA	NA	ENSMUSG00000113908
ENSMUSG00000098004	0.409698	-1.50386	3.47739	-0.432468	0.665402	NA	ENSMUSG00000098004	NA	Gm27027	2	93956817	93996354	-1	protein_coding	predicted gene, 27027 [Source:MGI Symbol;Acc:MGI:5504142]	NA	NA	NA	ENSMUSG00000098004
ENSMUSG00000060780	0.156037	-1.50337	5.48368	-0.274153	0.783967	NA	ENSMUSG00000060780	74342	Lrrtm1	6	77242689	77257791	1	protein_coding	leucine rich repeat transmembrane neuronal 1 [Source:MGI Symbol;Acc:MGI:2389173]	extracellular matrix protein(PC00102)	receptor(PC00197)	NA	ENSMUSG00000060780
ENSMUSG00000041986	0.814402	-1.50313	1.7189	-0.874476	0.381859	NA	ENSMUSG00000041986	270162	Elmod1	9	53911457	53975301	-1	protein_coding	ELMO/CED-12 domain containing 1 [Source:MGI Symbol;Acc:MGI:3583900]	signaling molecule(PC00207)	NA	NA	ENSMUSG00000041986
ENSMUSG00000037279	0.378376	-1.503	2.97451	-0.505293	0.613353	NA	ENSMUSG00000037279	107586	Ovol2	2	144305175	144332146	-1	protein_coding	ovo like zinc finger 2 [Source:MGI Symbol;Acc:MGI:1338039]	NA	NA	NA	ENSMUSG00000037279
ENSMUSG00000105861	0.266886	-1.50297	2.52421	-0.595422	0.551561	NA	ENSMUSG00000105861	NA	Gm43508	5	44623919	44627701	-1	TEC	predicted gene 43508 [Source:MGI Symbol;Acc:MGI:5663645]	NA	NA	NA	ENSMUSG00000105861
ENSMUSG00000115278	0.185703	-1.50268	4.25846	-0.35287	0.724186	NA	ENSMUSG00000115278	NA	NA	NA	NA	NA	NA	NA	NA	NA	NA	NA	ENSMUSG00000115278
ENSMUSG00000092354	0.306564	-1.50257	2.56259	-0.586348	0.557641	NA	ENSMUSG00000092354	NA	Gm20548	5	101837416	101846410	1	antisense_RNA	predicted gene 20548 [Source:MGI Symbol;Acc:MGI:5142013]	NA	NA	NA	ENSMUSG00000092354
ENSMUSG00000114512	0.492235	-1.50244	1.82461	-0.823431	0.410263	NA	ENSMUSG00000114512	NA	AC153150.1	13	39440565	39449671	1	lincRNA		NA	NA	NA	ENSMUSG00000114512
ENSMUSG00000043850	0.712724	-1.50226	1.43049	-1.05017	0.293639	NA	ENSMUSG00000043850	229320	Clrn1	3	58844028	58885340	-1	protein_coding	clarin 1 [Source:MGI Symbol;Acc:MGI:2388124]	NA	NA	NA	ENSMUSG00000043850
ENSMUSG00000028536	0.0797812	-1.50224	5.50778	-0.272748	0.785047	NA	ENSMUSG00000028536	66451	2610528J11Rik	4	118526999	118530228	1	protein_coding	RIKEN cDNA 2610528J11 gene [Source:MGI Symbol;Acc:MGI:1913701]	NA	NA	NA	ENSMUSG00000028536
ENSMUSG00000078117	0.0797812	-1.50224	5.50778	-0.272748	0.785047	NA	ENSMUSG00000078117	NA	Gm16485	9	8971791	8975773	1	protein_coding	predicted gene 16485 [Source:MGI Symbol;Acc:MGI:3642771]	NA	NA	NA	ENSMUSG00000078117
ENSMUSG00000085783	0.0797812	-1.50224	5.50778	-0.272748	0.785047	NA	ENSMUSG00000085783	NA	Gm9816	16	62717037	62718450	1	processed_pseudogene	predicted pseudogene 9816 [Source:MGI Symbol;Acc:MGI:3704465]	NA	NA	NA	ENSMUSG00000085783
ENSMUSG00000096173	0.0797812	-1.50224	5.50778	-0.272748	0.785047	NA	ENSMUSG00000096173	NA	Gm3150	15	72913357	72913560	1	processed_pseudogene	predicted gene 3150 [Source:MGI Symbol;Acc:MGI:3781329]	NA	NA	NA	ENSMUSG00000096173
ENSMUSG00000099877	0.0797812	-1.50224	5.50778	-0.272748	0.785047	NA	ENSMUSG00000099877	NA	Pinc	1	73390775	73407569	-1	lincRNA	pregnancy induced noncoding RNA [Source:MGI Symbol;Acc:MGI:3623820]	NA	NA	NA	ENSMUSG00000099877
ENSMUSG00000022382	0.108283	-1.50223	5.50778	-0.272747	0.785048	NA	ENSMUSG00000022382	22422	Wnt7b	15	85535439	85581821	-1	protein_coding	wingless-type MMTV integration site family, member 7B [Source:MGI Symbol;Acc:MGI:98962]	signaling molecule(PC00207)	NA	NA	ENSMUSG00000022382
ENSMUSG00000113919	0.14203	-1.50222	5.50778	-0.272745	0.785049	NA	ENSMUSG00000113919	NA	AC165254.2	13	45246632	45267711	-1	lincRNA		NA	NA	NA	ENSMUSG00000113919
ENSMUSG00000039419	0.151231	-1.50222	5.50778	-0.272745	0.785049	NA	ENSMUSG00000039419	66797	Cntnap2	6	45059357	47304213	1	protein_coding	contactin associated protein-like 2 [Source:MGI Symbol;Acc:MGI:1914047]	NA	NA	NA	ENSMUSG00000039419
ENSMUSG00000110409	0.167445	-1.50221	5.50778	-0.272743	0.78505	NA	ENSMUSG00000110409	NA	Gm9908	8	44934712	44935159	-1	bidirectional_promoter_lncRNA	predicted gene 9908 [Source:MGI Symbol;Acc:MGI:3708779]	NA	NA	NA	ENSMUSG00000110409
ENSMUSG00000115227	0.193091	-1.50221	5.50778	-0.272743	0.785051	NA	ENSMUSG00000115227	NA	NA	NA	NA	NA	NA	NA	NA	NA	NA	NA	ENSMUSG00000115227
ENSMUSG00000034607	0.279291	-1.50219	5.50778	-0.27274	0.785053	NA	ENSMUSG00000034607	69693	Pof1b	X	112638431	112698651	-1	protein_coding	premature ovarian failure 1B [Source:MGI Symbol;Acc:MGI:1916943]	NA	NA	NA	ENSMUSG00000034607
ENSMUSG00000081972	0.424987	-1.50214	5.50778	-0.272731	0.78506	NA	ENSMUSG00000081972	NA	Gm16397	X	134731571	134732064	1	processed_pseudogene	predicted pseudogene 16397 [Source:MGI Symbol;Acc:MGI:3648067]	NA	NA	NA	ENSMUSG00000081972
ENSMUSG00000086080	0.081267	-1.50183	5.50779	-0.272674	0.785104	NA	ENSMUSG00000086080	NA	1700123O12Rik	4	10479962	10797811	-1	lincRNA	RIKEN cDNA 1700123O12 gene [Source:MGI Symbol;Acc:MGI:1920874]	NA	NA	NA	ENSMUSG00000086080
ENSMUSG00000075210	0.0807843	-1.50183	5.50779	-0.272674	0.785104	NA	ENSMUSG00000075210	258561	Olfr1012	2	85757353	85762766	-1	protein_coding	olfactory receptor 1012 [Source:MGI Symbol;Acc:MGI:3030846]	NA	NA	NA	ENSMUSG00000075210
ENSMUSG00000062186	0.0803016	-1.50183	5.50779	-0.272674	0.785104	NA	ENSMUSG00000062186	259007	Olfr395	11	73903318	73909299	-1	protein_coding	olfactory receptor 395 [Source:MGI Symbol;Acc:MGI:3030229]	NA	NA	NA	ENSMUSG00000062186
ENSMUSG00000086507	0.147358	-1.50181	5.50779	-0.272671	0.785106	NA	ENSMUSG00000086507	NA	Adap2os	11	80158861	80177629	-1	antisense_RNA	ArfGAP with dual PH domains 2, opposite strand [Source:MGI Symbol;Acc:MGI:3650197]	NA	NA	NA	ENSMUSG00000086507
ENSMUSG00000102493	0.161041	-1.50181	5.50779	-0.27267	0.785107	NA	ENSMUSG00000102493	NA	Gm8010	1	178143301	178144272	1	unprocessed_pseudogene	predicted gene 8010 [Source:MGI Symbol;Acc:MGI:3648648]	NA	NA	NA	ENSMUSG00000102493
ENSMUSG00000086330	0.153841	-1.50181	5.50779	-0.27267	0.785107	NA	ENSMUSG00000086330	NA	1700007J10Rik	11	59725917	59740154	-1	processed_transcript	RIKEN cDNA 1700007J10 gene [Source:MGI Symbol;Acc:MGI:1916570]	NA	NA	NA	ENSMUSG00000086330
ENSMUSG00000060730	0.447239	-1.50123	2.41002	-0.622913	0.533342	NA	ENSMUSG00000060730	NA	Gm10086	5	108517179	108517532	1	processed_pseudogene	predicted pseudogene 10086 [Source:MGI Symbol;Acc:MGI:3642342]	NA	NA	NA	ENSMUSG00000060730
ENSMUSG00000103324	0.178726	-1.50121	4.3037	-0.348818	0.727226	NA	ENSMUSG00000103324	NA	Gm37402	17	11249344	11254343	1	TEC	predicted gene, 37402 [Source:MGI Symbol;Acc:MGI:5610630]	NA	NA	NA	ENSMUSG00000103324
ENSMUSG00000056031	0.182538	-1.5012	4.28769	-0.350118	0.72625	NA	ENSMUSG00000056031	NA	9330154J02Rik	9	85820241	85844323	-1	processed_transcript	RIKEN cDNA 9330154J02 gene [Source:MGI Symbol;Acc:MGI:3045244]	NA	NA	NA	ENSMUSG00000056031
ENSMUSG00000081262	0.2784	-1.50101	4.07398	-0.368438	0.712547	NA	ENSMUSG00000081262	NA	Gm12261	11	59577992	59578636	-1	processed_pseudogene	predicted gene 12261 [Source:MGI Symbol;Acc:MGI:3650914]	NA	NA	NA	ENSMUSG00000081262
ENSMUSG00000112273	0.326822	-1.50083	2.32325	-0.646005	0.518276	NA	ENSMUSG00000112273	NA	AC079681.1	10	70504880	70505248	-1	processed_pseudogene		NA	NA	NA	ENSMUSG00000112273
ENSMUSG00000072945	0.329654	-1.50078	2.99223	-0.501561	0.615977	NA	ENSMUSG00000072945	622473	Ripply1	X	139779549	139782353	-1	protein_coding	ripply transcriptional repressor 1 [Source:MGI Symbol;Acc:MGI:3614797]	NA	NA	NA	ENSMUSG00000072945
ENSMUSG00000092550	0.208322	-1.50044	3.53951	-0.423911	0.671631	NA	ENSMUSG00000092550	NA	Gm20496	17	34199316	34205449	-1	antisense_RNA	predicted gene 20496 [Source:MGI Symbol;Acc:MGI:5141961]	NA	NA	NA	ENSMUSG00000092550
ENSMUSG00000073408	0.679196	-1.5004	1.8685	-0.802998	0.421976	NA	ENSMUSG00000073408	268949	Dpcr1	17	35635752	35643695	-1	protein_coding	diffuse panbronchiolitis critical region 1 (human) [Source:MGI Symbol;Acc:MGI:2685476]	NA	NA	NA	ENSMUSG00000073408
ENSMUSG00000081316	0.287606	-1.50032	3.46197	-0.433373	0.664744	NA	ENSMUSG00000081316	NA	Gm16205	8	37787666	37788692	-1	processed_pseudogene	predicted gene 16205 [Source:MGI Symbol;Acc:MGI:3801883]	NA	NA	NA	ENSMUSG00000081316
ENSMUSG00000025916	0.67575	-1.50005	1.85011	-0.810788	0.417487	NA	ENSMUSG00000025916	69312	Ppp1r42	1	9968624	10009136	-1	protein_coding	protein phosphatase 1, regulatory subunit 42 [Source:MGI Symbol;Acc:MGI:1921138]	NA	NA	NA	ENSMUSG00000025916
ENSMUSG00000075199	0.614554	-1.49984	1.56688	-0.957215	0.338459	NA	ENSMUSG00000075199	18352	Olfr52	2	86179412	86185683	-1	protein_coding	olfactory receptor 52 [Source:MGI Symbol;Acc:MGI:1333748]	NA	NA	NA	ENSMUSG00000075199
ENSMUSG00000083812	1.14694	-1.49969	1.34911	-1.11162	0.266303	1	ENSMUSG00000083812	NA	Gm5054	7	142305842	142306294	-1	processed_pseudogene	predicted gene 5054 [Source:MGI Symbol;Acc:MGI:3649024]	NA	NA	NA	ENSMUSG00000083812
ENSMUSG00000066620	1.04903	-1.49967	1.35833	-1.10405	0.26957	1	ENSMUSG00000066620	NA	Gm4883	7	30709736	30710263	1	processed_pseudogene	predicted gene 4883 [Source:MGI Symbol;Acc:MGI:3643348]	NA	NA	NA	ENSMUSG00000066620
ENSMUSG00000082851	0.237527	-1.4995	2.99746	-0.500256	0.616895	NA	ENSMUSG00000082851	NA	Gm11931	4	33053838	33054284	-1	processed_pseudogene	predicted gene 11931 [Source:MGI Symbol;Acc:MGI:3652123]	NA	NA	NA	ENSMUSG00000082851
ENSMUSG00000082052	0.572239	-1.49912	1.80266	-0.831616	0.405626	NA	ENSMUSG00000082052	NA	Ywhaq-ps2	5	114828573	114829215	-1	processed_pseudogene	tyrosine 3-monooxygenase/tryptophan 5-monooxygenase activation protein theta, pseudogene 2 [Source:MGI Symbol;Acc:MGI:3650308]	NA	NA	NA	ENSMUSG00000082052
ENSMUSG00000092219	0.0803107	-1.49894	5.50785	-0.272146	0.78551	NA	ENSMUSG00000092219	NA	Gm20443	17	35737734	35739806	-1	lincRNA	predicted gene 20443 [Source:MGI Symbol;Acc:MGI:5141908]	NA	NA	NA	ENSMUSG00000092219
ENSMUSG00000097004	0.113575	-1.49893	5.50785	-0.272145	0.785511	NA	ENSMUSG00000097004	NA	4731419I09Rik	3	89337850	89347831	1	antisense_RNA	RIKEN cDNA 4731419I09 gene [Source:MGI Symbol;Acc:MGI:3704222]	NA	NA	NA	ENSMUSG00000097004
ENSMUSG00000097775	0.110503	-1.49893	5.50785	-0.272145	0.785511	NA	ENSMUSG00000097775	NA	4931440J10Rik	14	62760501	62830126	1	lincRNA	RIKEN cDNA 4931440J10 gene [Source:MGI Symbol;Acc:MGI:1918250]	NA	NA	NA	ENSMUSG00000097775
ENSMUSG00000115157	0.109559	-1.49893	5.50785	-0.272145	0.785511	NA	ENSMUSG00000115157	NA	NA	NA	NA	NA	NA	NA	NA	NA	NA	NA	ENSMUSG00000115157
ENSMUSG00000081014	0.139763	-1.49892	5.50785	-0.272143	0.785512	NA	ENSMUSG00000081014	NA	Gm13714	2	85268013	85268233	-1	processed_pseudogene	predicted gene 13714 [Source:MGI Symbol;Acc:MGI:3650276]	NA	NA	NA	ENSMUSG00000081014
ENSMUSG00000098597	0.139961	-1.49892	5.50785	-0.272143	0.785512	NA	ENSMUSG00000098597	NA	Mir6418	5	137529480	137529594	-1	miRNA	microRNA 6418 [Source:MGI Symbol;Acc:MGI:5531011]	NA	NA	NA	ENSMUSG00000098597
ENSMUSG00000111639	0.500578	-1.49886	1.82816	-0.819876	0.412287	NA	ENSMUSG00000111639	NA	AC117245.4	9	119983146	119988092	1	antisense_RNA		NA	NA	NA	ENSMUSG00000111639
ENSMUSG00000065158	0.470679	-1.49859	1.94874	-0.769004	0.441891	NA	ENSMUSG00000065158	NA	Gm25483	13	12589565	12589791	1	snoRNA	predicted gene, 25483 [Source:MGI Symbol;Acc:MGI:5455260]	NA	NA	NA	ENSMUSG00000065158
ENSMUSG00000104602	0.176564	-1.49859	4.31272	-0.347481	0.72823	NA	ENSMUSG00000104602	NA	Gm42779	5	110876603	110877273	1	processed_pseudogene	predicted gene 42779 [Source:MGI Symbol;Acc:MGI:5662916]	NA	NA	NA	ENSMUSG00000104602
ENSMUSG00000078442	0.199856	-1.49856	4.25628	-0.352081	0.724777	NA	ENSMUSG00000078442	70976	Ccdc105	10	78746926	78753065	-1	protein_coding	coiled-coil domain containing 105 [Source:MGI Symbol;Acc:MGI:1918226]	NA	NA	NA	ENSMUSG00000078442
ENSMUSG00000106738	0.389291	-1.49856	2.44608	-0.612637	0.540116	NA	ENSMUSG00000106738	NA	Gm5	5	150499747	150502304	-1	lincRNA	predicted gene 5 [Source:MGI Symbol;Acc:MGI:2684851]	NA	NA	NA	ENSMUSG00000106738
ENSMUSG00000104065	0.26124	-1.49844	2.6076	-0.574644	0.565532	NA	ENSMUSG00000104065	NA	Gm37197	3	13429558	13429958	1	processed_pseudogene	predicted gene, 37197 [Source:MGI Symbol;Acc:MGI:5610425]	NA	NA	NA	ENSMUSG00000104065
ENSMUSG00000054938	0.307041	-1.49842	2.6031	-0.575629	0.564866	NA	ENSMUSG00000054938	258918	Olfr1346	7	6467101	6478112	1	protein_coding	olfactory receptor 1346 [Source:MGI Symbol;Acc:MGI:3031180]	NA	NA	NA	ENSMUSG00000054938
ENSMUSG00000104753	0.155916	-1.4983	5.48382	-0.273223	0.784682	NA	ENSMUSG00000104753	NA	Gm35172	5	99508389	99511037	1	lincRNA	predicted gene, 35172 [Source:MGI Symbol;Acc:MGI:5594331]	NA	NA	NA	ENSMUSG00000104753
ENSMUSG00000110928	0.318558	-1.49825	2.58812	-0.578897	0.562659	NA	ENSMUSG00000110928	NA	AC132474.1	9	40363217	40366902	-1	TEC		NA	NA	NA	ENSMUSG00000110928
ENSMUSG00000090191	0.202047	-1.49814	3.55641	-0.421251	0.673572	NA	ENSMUSG00000090191	NA	9230105E05Rik	10	120389523	120392793	1	antisense_RNA	RIKEN cDNA 9230105E05 gene [Source:MGI Symbol;Acc:MGI:2444388]	NA	NA	NA	ENSMUSG00000090191
ENSMUSG00000104906	0.210946	-1.4977	5.1514	-0.290736	0.771253	NA	ENSMUSG00000104906	NA	Gm43005	3	126662379	126663026	1	TEC	predicted gene 43005 [Source:MGI Symbol;Acc:MGI:5663142]	NA	NA	NA	ENSMUSG00000104906
ENSMUSG00000099254	0.22915	-1.49757	3.01286	-0.497057	0.619149	NA	ENSMUSG00000099254	NA	Mir7030	5	115645573	115645632	1	miRNA	microRNA 7030 [Source:MGI Symbol;Acc:MGI:5530649]	NA	NA	NA	ENSMUSG00000099254
ENSMUSG00000084193	0.263503	-1.49754	2.99342	-0.500276	0.616881	NA	ENSMUSG00000084193	NA	Gm6823	X	70420716	70422554	-1	processed_pseudogene	predicted gene 6823 [Source:MGI Symbol;Acc:MGI:3648161]	NA	NA	NA	ENSMUSG00000084193
ENSMUSG00000108189	5.2798	-1.49742	0.625998	-2.39205	0.0167546	1	ENSMUSG00000108189	NA	Gm43887	6	46076179	46079364	1	TEC	predicted gene, 43887 [Source:MGI Symbol;Acc:MGI:5690279]	NA	NA	NA	ENSMUSG00000108189
ENSMUSG00000072709	0.33909	-1.49732	2.3227	-0.644644	0.519158	NA	ENSMUSG00000072709	259027	Olfr380	11	73452886	73457508	-1	protein_coding	olfactory receptor 380 [Source:MGI Symbol;Acc:MGI:3030214]	NA	NA	NA	ENSMUSG00000072709
ENSMUSG00000083507	0.982871	-1.49721	1.71172	-0.874684	0.381746	1	ENSMUSG00000083507	NA	Gm12842	4	117825181	117825656	-1	processed_pseudogene	predicted gene 12842 [Source:MGI Symbol;Acc:MGI:3651050]	NA	NA	NA	ENSMUSG00000083507
ENSMUSG00000116939	0.945419	-1.49706	1.41247	-1.05989	0.289196	1	ENSMUSG00000116939	NA	NA	NA	NA	NA	NA	NA	NA	NA	NA	NA	ENSMUSG00000116939
ENSMUSG00000092186	0.930717	-1.49671	1.4083	-1.06277	0.287885	1	ENSMUSG00000092186	NA	Gm5967	17	37947192	37947685	1	processed_pseudogene	predicted gene 5967 [Source:MGI Symbol;Acc:MGI:3645388]	NA	NA	NA	ENSMUSG00000092186
ENSMUSG00000109327	0.379226	-1.49619	2.11031	-0.708988	0.478332	NA	ENSMUSG00000109327	NA	Gm44995	7	89338370	89346288	1	antisense_RNA	predicted gene 44995 [Source:MGI Symbol;Acc:MGI:5753571]	NA	NA	NA	ENSMUSG00000109327
ENSMUSG00000061099	0.632848	-1.49605	2.0889	-0.71619	0.473874	NA	ENSMUSG00000061099	14447	Gapdhs	7	30729775	30743681	-1	protein_coding	glyceraldehyde-3-phosphate dehydrogenase, spermatogenic [Source:MGI Symbol;Acc:MGI:95653]	NA	NA	NA	ENSMUSG00000061099
ENSMUSG00000104272	0.667812	-1.49578	1.80378	-0.829248	0.406964	NA	ENSMUSG00000104272	NA	Gm38297	9	100703213	100704269	1	TEC	predicted gene, 38297 [Source:MGI Symbol;Acc:MGI:5611525]	NA	NA	NA	ENSMUSG00000104272
ENSMUSG00000082718	1.91007	-1.49567	1.67366	-0.893654	0.371507	1	ENSMUSG00000082718	NA	Gm14928	X	120178939	120179415	1	processed_pseudogene	predicted gene 14928 [Source:MGI Symbol;Acc:MGI:3648477]	NA	NA	NA	ENSMUSG00000082718
ENSMUSG00000105102	0.292466	-1.49494	2.2283	-0.670888	0.502292	NA	ENSMUSG00000105102	NA	Gm35507	3	106827307	106879361	-1	lincRNA	predicted gene, 35507 [Source:MGI Symbol;Acc:MGI:5594666]	NA	NA	NA	ENSMUSG00000105102
ENSMUSG00000007989	17.9507	-1.49491	1.16466	-1.28355	0.199298	1	ENSMUSG00000007989	14365	Fzd3	14	65192449	65262463	-1	protein_coding	frizzled class receptor 3 [Source:MGI Symbol;Acc:MGI:108476]	G-protein coupled receptor(PC00021)	protease inhibitor(PC00191)	signaling molecule(PC00207)	ENSMUSG00000007989
ENSMUSG00000083106	0.620026	-1.49466	1.60032	-0.933971	0.350319	NA	ENSMUSG00000083106	NA	Gm15309	8	21454424	21454663	1	processed_pseudogene	predicted gene 15309 [Source:MGI Symbol;Acc:MGI:3705458]	NA	NA	NA	ENSMUSG00000083106
ENSMUSG00000038239	0.239548	-1.49434	2.96536	-0.503933	0.614309	NA	ENSMUSG00000038239	15464	Hrc	7	45335290	45338974	1	protein_coding	histidine rich calcium binding protein [Source:MGI Symbol;Acc:MGI:96226]	NA	NA	NA	ENSMUSG00000038239
ENSMUSG00000109617	1.24359	-1.49433	1.64277	-0.909638	0.363013	1	ENSMUSG00000109617	NA	Gm7669	8	13745876	13747478	-1	processed_pseudogene	predicted gene 7669 [Source:MGI Symbol;Acc:MGI:3648911]	NA	NA	NA	ENSMUSG00000109617
ENSMUSG00000007107	0.544257	-1.49416	1.71639	-0.870526	0.384013	NA	ENSMUSG00000007107	27222	Atp1a4	1	172223513	172258414	-1	protein_coding	ATPase, Na+/K+ transporting, alpha 4 polypeptide [Source:MGI Symbol;Acc:MGI:1351335]	cation transporter(PC00068)	hydrolase(PC00121)	ion channel(PC00133)	ENSMUSG00000007107
ENSMUSG00000104107	0.475823	-1.49394	1.86732	-0.800045	0.423685	NA	ENSMUSG00000104107	NA	Gm37879	9	71939591	71941585	-1	TEC	predicted gene, 37879 [Source:MGI Symbol;Acc:MGI:5611107]	NA	NA	NA	ENSMUSG00000104107
ENSMUSG00000105428	0.5184	-1.49368	1.78521	-0.836695	0.402764	NA	ENSMUSG00000105428	NA	Mir3068	12	87437679	87437757	-1	miRNA	microRNA 3068 [Source:MGI Symbol;Acc:MGI:4834241]	NA	NA	NA	ENSMUSG00000105428
ENSMUSG00000030858	0.737017	-1.49359	1.86884	-0.79921	0.424169	NA	ENSMUSG00000030858	69318	1700007K09Rik	7	131325944	131329516	-1	protein_coding	RIKEN cDNA 1700007K09 gene [Source:MGI Symbol;Acc:MGI:1916568]	NA	NA	NA	ENSMUSG00000030858
ENSMUSG00000082322	0.581738	-1.49312	1.73041	-0.862872	0.388208	NA	ENSMUSG00000082322	NA	Gm9164	X	103887599	103888612	-1	processed_pseudogene	predicted gene 9164 [Source:MGI Symbol;Acc:MGI:3646866]	NA	NA	NA	ENSMUSG00000082322
ENSMUSG00000097958	0.59284	-1.49299	1.77005	-0.843471	0.398965	NA	ENSMUSG00000097958	NA	Gm8492	17	9320395	9321381	-1	processed_pseudogene	predicted gene 8492 [Source:MGI Symbol;Acc:MGI:3643249]	NA	NA	NA	ENSMUSG00000097958
ENSMUSG00000089812	0.517364	-1.49285	1.82497	-0.818014	0.413349	NA	ENSMUSG00000089812	NA	Gm15867	1	192854923	192856246	1	antisense_RNA	predicted gene 15867 [Source:MGI Symbol;Acc:MGI:3801862]	NA	NA	NA	ENSMUSG00000089812
ENSMUSG00000087389	0.109692	-1.4926	5.50798	-0.270989	0.786399	NA	ENSMUSG00000087389	NA	Gm15592	6	18270136	18289048	-1	antisense_RNA	predicted gene 15592 [Source:MGI Symbol;Acc:MGI:3783039]	NA	NA	NA	ENSMUSG00000087389
ENSMUSG00000074254	0.109127	-1.4926	5.50798	-0.270989	0.786399	NA	ENSMUSG00000074254	13086	Cyp2a4	7	26307169	26315088	1	protein_coding	cytochrome P450, family 2, subfamily a, polypeptide 4 [Source:MGI Symbol;Acc:MGI:88596]	NA	NA	NA	ENSMUSG00000074254
ENSMUSG00000102483	0.137898	-1.49259	5.50798	-0.270988	0.786401	NA	ENSMUSG00000102483	NA	Catspere1	1	177808550	177962233	1	unprocessed_pseudogene	cation channel sperm associated auxiliary subunit epsilon 1 [Source:MGI Symbol;Acc:MGI:3647531]	NA	NA	NA	ENSMUSG00000102483
ENSMUSG00000085731	0.170651	-1.49258	5.32697	-0.280193	0.77933	NA	ENSMUSG00000085731	NA	Gm16229	10	127663839	127665484	1	antisense_RNA	predicted gene 16229 [Source:MGI Symbol;Acc:MGI:3802021]	NA	NA	NA	ENSMUSG00000085731
ENSMUSG00000109523	0.173378	-1.49258	5.31025	-0.281074	0.778653	NA	ENSMUSG00000109523	14559	Gdf1	8	70329817	70331587	1	protein_coding	growth differentiation factor 1 [Source:MGI Symbol;Acc:MGI:95683]	NA	NA	NA	ENSMUSG00000109523
ENSMUSG00000030607	0.198729	-1.49256	5.1881	-0.287689	0.773585	NA	ENSMUSG00000030607	11595	Acan	7	79053483	79115099	1	protein_coding	aggrecan [Source:MGI Symbol;Acc:MGI:99602]	extracellular matrix glycoprotein(PC00100)	NA	NA	ENSMUSG00000030607
ENSMUSG00000096940	0.109481	-1.4923	5.50799	-0.270935	0.786441	NA	ENSMUSG00000096940	NA	Gm4755	12	8764901	8771181	-1	bidirectional_promoter_lncRNA	predicted gene 4755 [Source:MGI Symbol;Acc:MGI:3779434]	NA	NA	NA	ENSMUSG00000096940
ENSMUSG00000097488	0.238303	-1.49225	3.50261	-0.42604	0.670079	NA	ENSMUSG00000097488	NA	4732487G21Rik	12	86290761	86306006	-1	lincRNA	RIKEN cDNA 4732487G21 gene [Source:MGI Symbol;Acc:MGI:2441820]	NA	NA	NA	ENSMUSG00000097488
ENSMUSG00000040340	0.325906	-1.49224	3.48922	-0.427672	0.66889	NA	ENSMUSG00000040340	76406	Tex45	8	3470862	3487181	1	protein_coding	testis expressed 45 [Source:MGI Symbol;Acc:MGI:1923656]	NA	NA	NA	ENSMUSG00000040340
ENSMUSG00000104617	0.290564	-1.49216	4.08348	-0.365415	0.714802	NA	ENSMUSG00000104617	NA	Gm43356	3	136952790	136955093	-1	lincRNA	predicted gene 43356 [Source:MGI Symbol;Acc:MGI:5663493]	NA	NA	NA	ENSMUSG00000104617
ENSMUSG00000111529	1.29762	-1.49207	1.49871	-0.995574	0.319457	1	ENSMUSG00000111529	NA	AC154296.3	9	15321605	15322316	1	unprocessed_pseudogene		NA	NA	NA	ENSMUSG00000111529
ENSMUSG00000095150	0.786491	-1.49179	1.60492	-0.929512	0.352624	NA	ENSMUSG00000095150	NA	Rps19-ps13	18	40726269	40726709	1	processed_pseudogene	ribosomal protein S19, pseudogene 13 [Source:MGI Symbol;Acc:MGI:3644135]	NA	NA	NA	ENSMUSG00000095150
ENSMUSG00000116670	0.361694	-1.49134	2.32634	-0.641066	0.52148	NA	ENSMUSG00000116670	NA	NA	NA	NA	NA	NA	NA	NA	NA	NA	NA	ENSMUSG00000116670
ENSMUSG00000107658	0.615728	-1.49132	2.31869	-0.643175	0.520111	NA	ENSMUSG00000107658	NA	Gm44958	6	131291603	131292338	-1	processed_pseudogene	predicted gene 44958 [Source:MGI Symbol;Acc:MGI:5753534]	NA	NA	NA	ENSMUSG00000107658
ENSMUSG00000105881	2.48908	-1.49118	0.870203	-1.71361	0.086601	1	ENSMUSG00000105881	NA	4932422M17Rik	5	123138931	123141569	1	lincRNA	RIKEN cDNA 4932422M17 gene [Source:MGI Symbol;Acc:MGI:1921616]	NA	NA	NA	ENSMUSG00000105881
ENSMUSG00000085135	2.13147	-1.49115	1.55011	-0.961961	0.336069	1	ENSMUSG00000085135	NA	Gm13713	2	85160778	85193325	1	antisense_RNA	predicted gene 13713 [Source:MGI Symbol;Acc:MGI:3650490]	NA	NA	NA	ENSMUSG00000085135
ENSMUSG00000059343	0.345609	-1.4905	2.26497	-0.658063	0.510498	NA	ENSMUSG00000059343	353204	Aldoart1	4	72850583	72852634	-1	protein_coding	aldolase 1 A, retrogene 1 [Source:MGI Symbol;Acc:MGI:2447811]	NA	NA	NA	ENSMUSG00000059343
ENSMUSG00000081810	1.47525	-1.49023	1.55549	-0.958046	0.33804	1	ENSMUSG00000081810	NA	Gm11878	4	22519628	22520027	1	processed_pseudogene	predicted gene 11878 [Source:MGI Symbol;Acc:MGI:3651784]	NA	NA	NA	ENSMUSG00000081810
ENSMUSG00000111498	3.50229	-1.49011	1.49403	-0.997375	0.318583	1	ENSMUSG00000111498	NA	AC110091.4	9	120259628	120264358	1	lincRNA		NA	NA	NA	ENSMUSG00000111498
ENSMUSG00000086745	0.367939	-1.4901	2.55664	-0.582834	0.560005	NA	ENSMUSG00000086745	NA	Tspan2os	3	102720231	102735417	-1	antisense_RNA	tetraspanin 2, opposite strand [Source:MGI Symbol;Acc:MGI:1925741]	NA	NA	NA	ENSMUSG00000086745
ENSMUSG00000068855	0.921974	-1.48992	1.73607	-0.858213	0.390775	1	ENSMUSG00000068855	319176	Hist2h2ac	3	96220361	96220880	-1	protein_coding	histone cluster 2, H2ac [Source:MGI Symbol;Acc:MGI:2448316]	histone(PC00118)	NA	NA	ENSMUSG00000068855
ENSMUSG00000111006	0.440821	-1.48906	1.92913	-0.771883	0.440184	NA	ENSMUSG00000111006	NA	AC117639.1	10	21030490	21033793	-1	TEC		NA	NA	NA	ENSMUSG00000111006
ENSMUSG00000114943	0.95473	-1.48869	1.51057	-0.985512	0.324373	1	ENSMUSG00000114943	NA	AC113282.5	1	151192376	151194054	1	protein_coding		NA	NA	NA	ENSMUSG00000114943
ENSMUSG00000116624	1.84028	-1.48845	0.811038	-1.83524	0.0664703	1	ENSMUSG00000116624	NA	NA	NA	NA	NA	NA	NA	NA	NA	NA	NA	ENSMUSG00000116624
ENSMUSG00000102726	0.0785008	-1.4877	5.50806	-0.270096	0.787087	NA	ENSMUSG00000102726	NA	Gm37937	Y	17867025	17870364	1	lincRNA	predicted gene, 37937 [Source:MGI Symbol;Acc:MGI:5611165]	NA	NA	NA	ENSMUSG00000102726
ENSMUSG00000032900	0.112248	-1.48769	5.50806	-0.270094	0.787088	NA	ENSMUSG00000032900	67343	Tex43	18	56588350	56594782	1	protein_coding	testis expressed 43 [Source:MGI Symbol;Acc:MGI:1914593]	NA	NA	NA	ENSMUSG00000032900
ENSMUSG00000105061	0.483022	-1.48768	4.62298	-0.3218	0.747604	NA	ENSMUSG00000105061	NA	Gm6740	14	52861767	52862630	-1	processed_pseudogene	predicted gene 6740 [Source:MGI Symbol;Acc:MGI:3643503]	NA	NA	NA	ENSMUSG00000105061
ENSMUSG00000094865	0.1944	-1.48767	5.50806	-0.27009	0.787091	NA	ENSMUSG00000094865	NA	Gm7426	13	13418766	13419169	-1	processed_pseudogene	predicted gene 7426 [Source:MGI Symbol;Acc:MGI:3647725]	NA	NA	NA	ENSMUSG00000094865
ENSMUSG00000091105	0.342542	-1.48765	5.50806	-0.270086	0.787094	NA	ENSMUSG00000091105	NA	Mrto4-ps2	12	21776159	21776707	-1	processed_pseudogene	mRNA turnover 4, pseudogene 2 [Source:MGI Symbol;Acc:MGI:3779507]	NA	NA	NA	ENSMUSG00000091105
ENSMUSG00000101660	0.491489	-1.48764	5.50806	-0.270084	0.787096	NA	ENSMUSG00000101660	NA	Gm18666	1	93906244	93916768	1	unprocessed_pseudogene	predicted gene, 18666 [Source:MGI Symbol;Acc:MGI:5010851]	NA	NA	NA	ENSMUSG00000101660
ENSMUSG00000106218	0.469301	-1.4873	2.1463	-0.692962	0.488333	NA	ENSMUSG00000106218	NA	Gm43713	3	88845025	88900001	-1	antisense_RNA	predicted gene 43713 [Source:MGI Symbol;Acc:MGI:5663850]	NA	NA	NA	ENSMUSG00000106218
ENSMUSG00000003341	1.18355	-1.4867	1.59526	-0.931948	0.351363	1	ENSMUSG00000003341	67331	Atp8b3	10	80519584	80539124	-1	protein_coding	ATPase, class I, type 8B, member 3 [Source:MGI Symbol;Acc:MGI:1914581]	cation transporter(PC00068)	hydrolase(PC00121)	NA	ENSMUSG00000003341
ENSMUSG00000103364	0.273639	-1.48476	2.94715	-0.503796	0.614405	NA	ENSMUSG00000103364	NA	Gm38157	1	34032100	34033797	1	TEC	predicted gene, 38157 [Source:MGI Symbol;Acc:MGI:5611385]	NA	NA	NA	ENSMUSG00000103364
ENSMUSG00000087648	1.39007	-1.48392	1.49156	-0.994881	0.319794	1	ENSMUSG00000087648	NA	E130018N17Rik	2	168152603	168154513	-1	lincRNA	RIKEN cDNA E130018N17 gene [Source:MGI Symbol;Acc:MGI:1924267]	NA	NA	NA	ENSMUSG00000087648
ENSMUSG00000069266	2.21729	-1.48392	1.43079	-1.03714	0.299672	1	ENSMUSG00000069266	326620	Hist1h4b	13	23757013	23757409	1	protein_coding	histone cluster 1, H4b [Source:MGI Symbol;Acc:MGI:2448420]	NA	NA	NA	ENSMUSG00000069266
ENSMUSG00000087397	0.45745	-1.48383	2.10104	-0.706234	0.480043	NA	ENSMUSG00000087397	NA	Rapgef3os2	15	97766549	97768713	1	antisense_RNA	Rap guanine nucleotide exchange factor (GEF) 3, opposite strand 2 [Source:MGI Symbol;Acc:MGI:3826581]	NA	NA	NA	ENSMUSG00000087397
ENSMUSG00000109905	0.943485	-1.48347	1.52838	-0.970615	0.33174	1	ENSMUSG00000109905	NA	Gm7380	7	139774714	139775179	1	processed_pseudogene	predicted gene 7380 [Source:MGI Symbol;Acc:MGI:3646626]	NA	NA	NA	ENSMUSG00000109905
ENSMUSG00000059280	0.462324	-1.48307	2.31842	-0.639689	0.522375	NA	ENSMUSG00000059280	22363	Vpreb2	16	17980565	17981080	1	protein_coding	pre-B lymphocyte gene 2 [Source:MGI Symbol;Acc:MGI:98937]	immunoglobulin(PC00123)	NA	NA	ENSMUSG00000059280
ENSMUSG00000084183	1.85385	-1.48275	1.41185	-1.05022	0.293615	1	ENSMUSG00000084183	NA	Gm12009	11	15049158	15050257	1	processed_pseudogene	predicted gene 12009 [Source:MGI Symbol;Acc:MGI:3651311]	NA	NA	NA	ENSMUSG00000084183
ENSMUSG00000107364	0.944018	-1.48256	1.61151	-0.91998	0.357583	1	ENSMUSG00000107364	NA	Gm43051	5	118707402	118710079	1	TEC	predicted gene 43051 [Source:MGI Symbol;Acc:MGI:5663188]	NA	NA	NA	ENSMUSG00000107364
ENSMUSG00000105519	1.01803	-1.4817	1.70419	-0.869447	0.384603	1	ENSMUSG00000105519	NA	E430021H15Rik	5	44213801	44217259	-1	TEC	RIKEN cDNA E430021H15 gene [Source:MGI Symbol;Acc:MGI:2444377]	NA	NA	NA	ENSMUSG00000105519
ENSMUSG00000111606	0.689584	-1.48139	1.58875	-0.932427	0.351116	NA	ENSMUSG00000111606	NA	AC161825.2	10	19262034	19262983	1	processed_pseudogene		NA	NA	NA	ENSMUSG00000111606
ENSMUSG00000057446	0.719497	-1.48135	1.74812	-0.847396	0.396775	NA	ENSMUSG00000057446	56094	Cts8	13	61246745	61255358	-1	protein_coding	cathepsin 8 [Source:MGI Symbol;Acc:MGI:1860275]	cysteine protease(PC00081)	protease inhibitor(PC00191)	NA	ENSMUSG00000057446
ENSMUSG00000040432	0.491716	-1.48115	1.93844	-0.764098	0.444809	NA	ENSMUSG00000040432	57260	Ltb4r2	14	55761428	55763229	1	protein_coding	leukotriene B4 receptor 2 [Source:MGI Symbol;Acc:MGI:1888501]	G-protein coupled receptor(PC00021)	NA	NA	ENSMUSG00000040432
ENSMUSG00000110126	0.854109	-1.48112	1.77767	-0.833182	0.404742	NA	ENSMUSG00000110126	NA	Gm9347	7	136810909	136812515	1	processed_pseudogene	predicted gene 9347 [Source:MGI Symbol;Acc:MGI:3648409]	NA	NA	NA	ENSMUSG00000110126
ENSMUSG00000116718	0.38888	-1.48104	2.50398	-0.591474	0.554203	NA	ENSMUSG00000116718	NA	NA	NA	NA	NA	NA	NA	NA	NA	NA	NA	ENSMUSG00000116718
ENSMUSG00000040136	1.14713	-1.48043	1.62061	-0.913501	0.360979	1	ENSMUSG00000040136	20927	Abcc8	7	46104523	46180033	-1	protein_coding	ATP-binding cassette, sub-family C (CFTR/MRP), member 8 [Source:MGI Symbol;Acc:MGI:1352629]	ATP-binding cassette (ABC) transporter(PC00003)	NA	NA	ENSMUSG00000040136
ENSMUSG00000099061	0.832315	-1.48029	1.68347	-0.879308	0.379234	NA	ENSMUSG00000099061	NA	Gm28050	5	106500894	106574718	-1	lincRNA	predicted gene, 28050 [Source:MGI Symbol;Acc:MGI:5547786]	NA	NA	NA	ENSMUSG00000099061
ENSMUSG00000114545	0.372571	-1.48019	1.91949	-0.771139	0.440625	NA	ENSMUSG00000114545	NA	AC154848.1	13	41543005	41559913	-1	lincRNA		NA	NA	NA	ENSMUSG00000114545
ENSMUSG00000098769	0.392107	-1.47996	1.9607	-0.754813	0.450361	NA	ENSMUSG00000098769	NA	Mir8103	11	97063768	97063874	1	miRNA	microRNA 8103 [Source:MGI Symbol;Acc:MGI:5531223]	NA	NA	NA	ENSMUSG00000098769
ENSMUSG00000022483	0.792211	-1.47992	1.9668	-0.75245	0.45178	NA	ENSMUSG00000022483	12824	Col2a1	15	97975602	98004695	-1	protein_coding	collagen, type II, alpha 1 [Source:MGI Symbol;Acc:MGI:88452]	NA	NA	NA	ENSMUSG00000022483
ENSMUSG00000082246	0.904572	-1.47961	1.50096	-0.98578	0.324241	NA	ENSMUSG00000082246	NA	Gm13047	4	141084864	141085678	1	processed_pseudogene	predicted gene 13047 [Source:MGI Symbol;Acc:MGI:3651114]	NA	NA	NA	ENSMUSG00000082246
ENSMUSG00000085763	0.847197	-1.47957	1.4535	-1.01794	0.308707	NA	ENSMUSG00000085763	NA	Smc2os	4	52430285	52438965	-1	antisense_RNA	structural maintenance of chromosomes 2, opposite strand [Source:MGI Symbol;Acc:MGI:1919898]	NA	NA	NA	ENSMUSG00000085763
ENSMUSG00000094566	0.578682	-1.47947	2.05446	-0.720126	0.471447	NA	ENSMUSG00000094566	NA	Gm12620	11	60682179	60684164	-1	processed_pseudogene	predicted gene 12620 [Source:MGI Symbol;Acc:MGI:3649879]	NA	NA	NA	ENSMUSG00000094566
ENSMUSG00000037600	0.986224	-1.47891	1.51464	-0.976411	0.328861	1	ENSMUSG00000037600	69073	Kdf1	4	133518963	133530790	1	protein_coding	keratinocyte differentiation factor 1 [Source:MGI Symbol;Acc:MGI:1916323]	NA	NA	NA	ENSMUSG00000037600
ENSMUSG00000084079	0.333345	-1.47843	2.31854	-0.637655	0.523698	NA	ENSMUSG00000084079	NA	Gm11631	11	98063888	98064043	1	processed_pseudogene	predicted gene 11631 [Source:MGI Symbol;Acc:MGI:3650476]	NA	NA	NA	ENSMUSG00000084079
ENSMUSG00000068629	0.342612	-1.4784	2.32759	-0.635162	0.525323	NA	ENSMUSG00000068629	NA	Gm6155	7	84834539	84834879	-1	processed_pseudogene	predicted pseudogene 6155 [Source:MGI Symbol;Acc:MGI:3643981]	NA	NA	NA	ENSMUSG00000068629
ENSMUSG00000113512	0.38233	-1.47833	2.34745	-0.629761	0.528851	NA	ENSMUSG00000113512	NA	AL591207.2	12	110319592	110320173	-1	processed_pseudogene		NA	NA	NA	ENSMUSG00000113512
ENSMUSG00000074121	0.184401	-1.47813	5.23107	-0.282568	0.777508	NA	ENSMUSG00000074121	78405	Ntf5	7	45413695	45417179	1	protein_coding	neurotrophin 5 [Source:MGI Symbol;Acc:MGI:97381]	neurotrophic factor(PC00163)	NA	NA	ENSMUSG00000074121
ENSMUSG00000076916	0.161884	-1.47799	5.33616	-0.276976	0.781798	NA	ENSMUSG00000076916	NA	Traj13	14	54205741	54205797	1	TR_J_gene	T cell receptor alpha joining 13 [Source:MGI Symbol;Acc:MGI:4439584]	NA	NA	NA	ENSMUSG00000076916
ENSMUSG00000107015	0.584421	-1.47796	1.7485	-0.845274	0.397958	NA	ENSMUSG00000107015	NA	2900076G11Rik	5	31581079	31581709	1	TEC	RIKEN cDNA 2900076G11 gene [Source:MGI Symbol;Acc:MGI:1920302]	NA	NA	NA	ENSMUSG00000107015
ENSMUSG00000087569	0.44879	-1.47791	1.99261	-0.741696	0.458271	NA	ENSMUSG00000087569	NA	Gm8464	X	152489661	152491860	-1	transcribed_processed_pseudogene	predicted pseudogene 8464 [Source:MGI Symbol;Acc:MGI:3645517]	NA	NA	NA	ENSMUSG00000087569
ENSMUSG00000104877	0.362759	-1.47763	2.60527	-0.567168	0.5706	NA	ENSMUSG00000104877	NA	Gm42651	5	123682130	123683468	-1	TEC	predicted gene 42651 [Source:MGI Symbol;Acc:MGI:5662788]	NA	NA	NA	ENSMUSG00000104877
ENSMUSG00000047261	0.258367	-1.47762	2.60885	-0.566388	0.57113	NA	ENSMUSG00000047261	14432	Gap43	16	42248442	42340651	-1	protein_coding	growth associated protein 43 [Source:MGI Symbol;Acc:MGI:95639]	NA	NA	NA	ENSMUSG00000047261
ENSMUSG00000053121	0.327972	-1.47762	2.61003	-0.56613	0.571306	NA	ENSMUSG00000053121	NA	Gm5129	5	29735637	29735936	-1	protein_coding	predicted gene 5129 [Source:MGI Symbol;Acc:MGI:3648499]	NA	NA	NA	ENSMUSG00000053121
ENSMUSG00000115754	0.289462	-1.47761	2.61169	-0.56577	0.57155	NA	ENSMUSG00000115754	NA	NA	NA	NA	NA	NA	NA	NA	NA	NA	NA	ENSMUSG00000115754
ENSMUSG00000084249	0.430231	-1.4771	2.1577	-0.684569	0.493616	NA	ENSMUSG00000084249	NA	Gm12267	11	60449210	60449970	-1	processed_pseudogene	predicted gene 12267 [Source:MGI Symbol;Acc:MGI:3651211]	NA	NA	NA	ENSMUSG00000084249
ENSMUSG00000114741	0.311022	-1.47695	2.95647	-0.499563	0.617383	NA	ENSMUSG00000114741	NA	AC154404.1	14	37465822	37467898	-1	TEC		NA	NA	NA	ENSMUSG00000114741
ENSMUSG00000096806	0.265514	-1.4769	2.98642	-0.494538	0.620926	NA	ENSMUSG00000096806	258065	Olfr312	11	58829237	58834780	1	protein_coding	olfactory receptor 312 [Source:MGI Symbol;Acc:MGI:3030146]	NA	NA	NA	ENSMUSG00000096806
ENSMUSG00000075160	0.235141	-1.47689	2.99737	-0.492728	0.622205	NA	ENSMUSG00000075160	258766	Olfr259	2	87104578	87114567	-1	protein_coding	olfactory receptor 259 [Source:MGI Symbol;Acc:MGI:3030093]	NA	NA	NA	ENSMUSG00000075160
ENSMUSG00000109560	0.348249	-1.47688	2.99682	-0.492815	0.622143	NA	ENSMUSG00000109560	NA	Gm8463	7	100524016	100524628	1	processed_pseudogene	predicted gene 8463 [Source:MGI Symbol;Acc:MGI:3644490]	NA	NA	NA	ENSMUSG00000109560
ENSMUSG00000084789	0.330821	-1.47686	3.00906	-0.490804	0.623565	NA	ENSMUSG00000084789	NA	Gm12974	4	133816420	133817614	1	lincRNA	predicted gene 12974 [Source:MGI Symbol;Acc:MGI:3650037]	NA	NA	NA	ENSMUSG00000084789
ENSMUSG00000023216	0.872632	-1.47675	2.24128	-0.658887	0.509968	NA	ENSMUSG00000023216	13828	Epb42	2	121017891	121037072	-1	protein_coding	erythrocyte membrane protein band 4.2 [Source:MGI Symbol;Acc:MGI:95402]	acyltransferase(PC00042)	NA	NA	ENSMUSG00000023216
ENSMUSG00000077549	0.234192	-1.47626	3.50961	-0.420632	0.674024	NA	ENSMUSG00000077549	NA	Snord71	8	109839295	109839379	1	snoRNA	small nucleolar RNA, C/D box 71 [Source:MGI Symbol;Acc:MGI:3819554]	NA	NA	NA	ENSMUSG00000077549
ENSMUSG00000112340	0.227457	-1.47624	3.52592	-0.418682	0.675449	NA	ENSMUSG00000112340	NA	AC110043.1	10	49661647	49663273	-1	TEC		NA	NA	NA	ENSMUSG00000112340
ENSMUSG00000083116	0.204508	-1.47622	3.54568	-0.416344	0.677158	NA	ENSMUSG00000083116	NA	Gm13410	2	24178834	24180317	1	processed_pseudogene	predicted gene 13410 [Source:MGI Symbol;Acc:MGI:3650681]	NA	NA	NA	ENSMUSG00000083116
ENSMUSG00000090576	0.198621	-1.47621	3.56274	-0.414346	0.678621	NA	ENSMUSG00000090576	NA	Gm17055	6	108656917	108659537	1	processed_transcript	predicted gene 17055 [Source:MGI Symbol;Acc:MGI:4937882]	NA	NA	NA	ENSMUSG00000090576
ENSMUSG00000113392	0.248646	-1.47595	2.94504	-0.501165	0.616255	NA	ENSMUSG00000113392	NA	AC155256.3	12	54679311	54679809	-1	processed_pseudogene		NA	NA	NA	ENSMUSG00000113392
ENSMUSG00000113774	0.180693	-1.47569	4.29118	-0.343889	0.73093	NA	ENSMUSG00000113774	NA	AC159307.1	12	24974609	24975554	-1	bidirectional_promoter_lncRNA		NA	NA	NA	ENSMUSG00000113774
ENSMUSG00000105831	0.170905	-1.47567	4.33462	-0.340437	0.733527	NA	ENSMUSG00000105831	NA	Gm43184	5	43948120	43948661	-1	TEC	predicted gene 43184 [Source:MGI Symbol;Acc:MGI:5663321]	NA	NA	NA	ENSMUSG00000105831
ENSMUSG00000083325	0.162195	-1.47564	4.37596	-0.337216	0.735954	NA	ENSMUSG00000083325	NA	Gm14121	2	150499466	150500845	-1	transcribed_processed_pseudogene	predicted gene 14121 [Source:MGI Symbol;Acc:MGI:3651769]	NA	NA	NA	ENSMUSG00000083325
ENSMUSG00000107472	0.183192	-1.47528	5.24902	-0.281058	0.778666	NA	ENSMUSG00000107472	NA	Gm44265	6	88353142	88353606	-1	sense_intronic	predicted gene, 44265 [Source:MGI Symbol;Acc:MGI:5690657]	NA	NA	NA	ENSMUSG00000107472
ENSMUSG00000106230	0.174697	-1.47526	5.29937	-0.278385	0.780717	NA	ENSMUSG00000106230	NA	Gm29811	3	132842202	132878596	-1	lincRNA	predicted gene, 29811 [Source:MGI Symbol;Acc:MGI:5588970]	NA	NA	NA	ENSMUSG00000106230
ENSMUSG00000050114	0.17487	-1.47526	5.2983	-0.278441	0.780674	NA	ENSMUSG00000050114	320769	Prdx6b	2	80292472	80295356	1	protein_coding	peroxiredoxin 6B [Source:MGI Symbol;Acc:MGI:1336888]	peroxidase(PC00180)	NA	NA	ENSMUSG00000050114
ENSMUSG00000103411	0.173357	-1.47526	5.30758	-0.277954	0.781048	NA	ENSMUSG00000103411	NA	Gm18300	1	9499338	9501522	-1	processed_pseudogene	predicted gene, 18300 [Source:MGI Symbol;Acc:MGI:5010485]	NA	NA	NA	ENSMUSG00000103411
ENSMUSG00000104445	0.166544	-1.47525	5.35073	-0.27571	0.782771	NA	ENSMUSG00000104445	58176	Rhbg	3	88242874	88254709	-1	protein_coding	Rhesus blood group-associated B glycoprotein [Source:MGI Symbol;Acc:MGI:1927379]	cation transporter(PC00068)	NA	NA	ENSMUSG00000104445
ENSMUSG00000094668	0.0784358	-1.47523	5.50823	-0.267822	0.788836	NA	ENSMUSG00000094668	NA	Gm24871	1	171503048	171503163	-1	snRNA	predicted gene, 24871 [Source:MGI Symbol;Acc:MGI:5454648]	NA	NA	NA	ENSMUSG00000094668
ENSMUSG00000099610	0.0784358	-1.47523	5.50823	-0.267822	0.788836	NA	ENSMUSG00000099610	NA	Gm37545	9	92539936	92540083	-1	processed_pseudogene	predicted gene, 37545 [Source:MGI Symbol;Acc:MGI:5610773]	NA	NA	NA	ENSMUSG00000099610
ENSMUSG00000113314	0.0793503	-1.47523	5.50823	-0.267822	0.788836	NA	ENSMUSG00000113314	NA	AC122013.1	12	105394860	105404618	-1	lincRNA		NA	NA	NA	ENSMUSG00000113314
ENSMUSG00000116930	0.0793503	-1.47523	5.50823	-0.267822	0.788836	NA	ENSMUSG00000116930	NA	NA	NA	NA	NA	NA	NA	NA	NA	NA	NA	ENSMUSG00000116930
ENSMUSG00000098480	0.0789094	-1.47523	5.50823	-0.267822	0.788836	NA	ENSMUSG00000098480	NA	Mir6387	12	15800994	15801101	-1	miRNA	microRNA 6387 [Source:MGI Symbol;Acc:MGI:5530663]	NA	NA	NA	ENSMUSG00000098480
ENSMUSG00000112887	0.0783939	-1.47523	5.50823	-0.267822	0.788836	NA	ENSMUSG00000112887	NA	AC155258.2	12	32931480	32931732	-1	processed_pseudogene		NA	NA	NA	ENSMUSG00000112887
ENSMUSG00000085228	0.0779204	-1.47523	5.50823	-0.267822	0.788836	NA	ENSMUSG00000085228	NA	Gm14376	7	144469533	144469993	-1	sense_intronic	predicted gene 14376 [Source:MGI Symbol;Acc:MGI:3651797]	NA	NA	NA	ENSMUSG00000085228
ENSMUSG00000093687	0.0788767	-1.47523	5.50823	-0.267822	0.788836	NA	ENSMUSG00000093687	NA	Gm20637	2	155546385	155546846	1	processed_pseudogene	predicted gene 20637 [Source:MGI Symbol;Acc:MGI:5313084]	NA	NA	NA	ENSMUSG00000093687
ENSMUSG00000111927	0.0788675	-1.47523	5.50823	-0.267822	0.788836	NA	ENSMUSG00000111927	NA	AC100590.1	10	17522613	17526914	-1	lincRNA		NA	NA	NA	ENSMUSG00000111927
ENSMUSG00000116355	0.0788675	-1.47523	5.50823	-0.267822	0.788836	NA	ENSMUSG00000116355	NA	NA	NA	NA	NA	NA	NA	NA	NA	NA	NA	ENSMUSG00000116355
ENSMUSG00000086796	0.111668	-1.47522	5.50823	-0.267821	0.788837	NA	ENSMUSG00000086796	NA	4932702P03Rik	13	24905593	24914272	1	antisense_RNA	RIKEN cDNA 4932702P03 gene [Source:MGI Symbol;Acc:MGI:1921673]	NA	NA	NA	ENSMUSG00000086796
ENSMUSG00000040657	0.112825	-1.47522	5.50823	-0.267821	0.788837	NA	ENSMUSG00000040657	NA	1700063H04Rik	6	122391379	122392687	1	lincRNA	RIKEN cDNA 1700063H04 gene [Source:MGI Symbol;Acc:MGI:1921519]	NA	NA	NA	ENSMUSG00000040657
ENSMUSG00000045126	0.112783	-1.47522	5.50823	-0.267821	0.788837	NA	ENSMUSG00000045126	258694	Olfr1445	19	12883855	12884855	1	protein_coding	olfactory receptor 1445 [Source:MGI Symbol;Acc:MGI:3031279]	NA	NA	NA	ENSMUSG00000045126
ENSMUSG00000102983	0.10656	-1.47522	5.50823	-0.267821	0.788837	NA	ENSMUSG00000102983	NA	Gm38320	6	72652320	72653600	1	TEC	predicted gene, 38320 [Source:MGI Symbol;Acc:MGI:5611548]	NA	NA	NA	ENSMUSG00000102983
ENSMUSG00000056203	0.110939	-1.47522	5.50823	-0.267821	0.788837	NA	ENSMUSG00000056203	387512	Tas2r135	6	42405434	42406526	1	protein_coding	taste receptor, type 2, member 135 [Source:MGI Symbol;Acc:MGI:2681302]	NA	NA	NA	ENSMUSG00000056203
ENSMUSG00000097582	0.108906	-1.47522	5.50823	-0.267821	0.788837	NA	ENSMUSG00000097582	NA	Gm26527	13	93940990	93943015	-1	lincRNA	predicted gene, 26527 [Source:MGI Symbol;Acc:MGI:5477021]	NA	NA	NA	ENSMUSG00000097582
ENSMUSG00000086777	0.110498	-1.47522	5.50823	-0.267821	0.788837	NA	ENSMUSG00000086777	NA	Far2os2	6	148006580	148047339	-1	antisense_RNA	fatty acyl CoA reductase 2, opposite strand 2 [Source:MGI Symbol;Acc:MGI:1925091]	NA	NA	NA	ENSMUSG00000086777
ENSMUSG00000097289	0.115251	-1.47522	5.50823	-0.267821	0.788837	NA	ENSMUSG00000097289	NA	2010300F17Rik	11	96712982	96747436	-1	lincRNA	RIKEN cDNA 2010300F17 gene [Source:MGI Symbol;Acc:MGI:1917134]	NA	NA	NA	ENSMUSG00000097289
ENSMUSG00000046652	0.111584	-1.47522	5.50823	-0.26782	0.788838	NA	ENSMUSG00000046652	387514	Tas2r143	6	42400238	42401119	1	protein_coding	taste receptor, type 2, member 143 [Source:MGI Symbol;Acc:MGI:2681310]	NA	NA	NA	ENSMUSG00000046652
ENSMUSG00000112582	0.107719	-1.47522	5.50823	-0.26782	0.788838	NA	ENSMUSG00000112582	NA	AC153509.1	10	71318766	71319355	1	processed_pseudogene		NA	NA	NA	ENSMUSG00000112582
ENSMUSG00000108344	0.140712	-1.47521	5.50823	-0.267819	0.788839	NA	ENSMUSG00000108344	NA	Gm8952	6	72073052	72074153	-1	processed_pseudogene	predicted gene 8952 [Source:MGI Symbol;Acc:MGI:3648959]	NA	NA	NA	ENSMUSG00000108344
ENSMUSG00000088608	0.140159	-1.47521	5.50823	-0.267819	0.788839	NA	ENSMUSG00000088608	NA	Gm24186	10	94821529	94821655	-1	rRNA	predicted gene, 24186 [Source:MGI Symbol;Acc:MGI:5453963]	NA	NA	NA	ENSMUSG00000088608
ENSMUSG00000109295	0.141766	-1.47521	5.50823	-0.267819	0.788839	NA	ENSMUSG00000109295	NA	Gm5739	8	5079294	5080996	1	processed_pseudogene	predicted gene 5739 [Source:MGI Symbol;Acc:MGI:3645094]	NA	NA	NA	ENSMUSG00000109295
ENSMUSG00000117332	0.142183	-1.47521	5.50823	-0.267819	0.788839	NA	ENSMUSG00000117332	NA	NA	NA	NA	NA	NA	NA	NA	NA	NA	NA	ENSMUSG00000117332
ENSMUSG00000093302	0.139141	-1.47521	5.50823	-0.267819	0.788839	NA	ENSMUSG00000093302	NA	Gm23801	5	29336780	29336846	-1	miRNA	predicted gene, 23801 [Source:MGI Symbol;Acc:MGI:5453578]	NA	NA	NA	ENSMUSG00000093302
ENSMUSG00000081139	0.146241	-1.47521	5.50823	-0.267819	0.788839	NA	ENSMUSG00000081139	NA	Gm13333	2	18758984	18759764	1	processed_pseudogene	predicted gene 13333 [Source:MGI Symbol;Acc:MGI:3649264]	NA	NA	NA	ENSMUSG00000081139
ENSMUSG00000102234	0.170612	-1.4752	5.50823	-0.267817	0.78884	NA	ENSMUSG00000102234	NA	Gm37885	1	182484179	182492473	1	antisense_RNA	predicted gene, 37885 [Source:MGI Symbol;Acc:MGI:5611113]	NA	NA	NA	ENSMUSG00000102234
ENSMUSG00000115736	1.14025	-1.47515	1.34322	-1.09823	0.272106	1	ENSMUSG00000115736	NA	NA	NA	NA	NA	NA	NA	NA	NA	NA	NA	ENSMUSG00000115736
ENSMUSG00000112407	0.504789	-1.47439	2.05962	-0.715853	0.474082	NA	ENSMUSG00000112407	NA	AC113204.1	12	42966884	43034217	-1	lincRNA		NA	NA	NA	ENSMUSG00000112407
ENSMUSG00000110908	0.176949	-1.47386	4.3076	-0.342153	0.732236	NA	ENSMUSG00000110908	NA	AL603745.1	11	83036377	83036908	1	processed_pseudogene		NA	NA	NA	ENSMUSG00000110908
ENSMUSG00000109505	0.18807	-1.47361	4.24411	-0.347214	0.728431	NA	ENSMUSG00000109505	NA	Gm44677	7	91627272	91631010	1	TEC	predicted gene 44677 [Source:MGI Symbol;Acc:MGI:5753253]	NA	NA	NA	ENSMUSG00000109505
ENSMUSG00000086750	0.0779671	-1.47345	5.50826	-0.267499	0.789085	NA	ENSMUSG00000086750	NA	Gm11770	11	120215082	120216993	-1	antisense_RNA	predicted gene 11770 [Source:MGI Symbol;Acc:MGI:3651450]	NA	NA	NA	ENSMUSG00000086750
ENSMUSG00000100957	0.0774935	-1.47345	5.50826	-0.267499	0.789085	NA	ENSMUSG00000100957	NA	Gm28762	Y	32523345	32526576	-1	lincRNA	predicted gene 28762 [Source:MGI Symbol;Acc:MGI:5579468]	NA	NA	NA	ENSMUSG00000100957
ENSMUSG00000031449	0.0784498	-1.47345	5.50826	-0.267499	0.789085	NA	ENSMUSG00000031449	11945	Atp4b	8	13386205	13396825	-1	protein_coding	ATPase, H+/K+ exchanging, beta polypeptide [Source:MGI Symbol;Acc:MGI:88114]	cation transporter(PC00068)	NA	NA	ENSMUSG00000031449
ENSMUSG00000105078	0.0784498	-1.47345	5.50826	-0.267499	0.789085	NA	ENSMUSG00000105078	102639650	Gm35911	5	99906254	99951092	1	protein_coding	predicted gene, 35911 [Source:MGI Symbol;Acc:MGI:5595070]	NA	NA	NA	ENSMUSG00000105078
ENSMUSG00000085007	0.140771	-1.47343	5.50192	-0.267804	0.78885	NA	ENSMUSG00000085007	NA	Gm11549	3	36515057	36521813	-1	protein_coding	predicted gene 11549 [Source:MGI Symbol;Acc:MGI:3650339]	NA	NA	NA	ENSMUSG00000085007
ENSMUSG00000002664	0.140209	-1.47343	5.50682	-0.267565	0.789034	NA	ENSMUSG00000002664	19197	Pspn	17	56999457	57000018	-1	protein_coding	persephin [Source:MGI Symbol;Acc:MGI:1201684]	NA	NA	NA	ENSMUSG00000002664
ENSMUSG00000117372	0.138728	-1.47343	5.50826	-0.267495	0.789088	NA	ENSMUSG00000117372	NA	NA	NA	NA	NA	NA	NA	NA	NA	NA	NA	ENSMUSG00000117372
ENSMUSG00000114105	0.153202	-1.47328	5.39628	-0.273017	0.78484	NA	ENSMUSG00000114105	NA	AC163354.3	12	25300071	25304613	-1	lincRNA		NA	NA	NA	ENSMUSG00000114105
ENSMUSG00000112951	0.28081	-1.4728	4.11884	-0.357576	0.720661	NA	ENSMUSG00000112951	NA	AC165157.1	12	20312515	20312680	1	processed_pseudogene		NA	NA	NA	ENSMUSG00000112951
ENSMUSG00000073682	0.231827	-1.47277	4.18945	-0.351543	0.725181	NA	ENSMUSG00000073682	NA	Gm10563	4	155614413	155645408	-1	protein_coding	predicted gene 10563 [Source:MGI Symbol;Acc:MGI:3642630]	NA	NA	NA	ENSMUSG00000073682
ENSMUSG00000047298	0.168499	-1.47238	5.33856	-0.275801	0.782701	NA	ENSMUSG00000047298	240595	Kcnv2	19	27322588	27337179	1	protein_coding	potassium channel, subfamily V, member 2 [Source:MGI Symbol;Acc:MGI:2670981]	NA	NA	NA	ENSMUSG00000047298
ENSMUSG00000112841	0.108614	-1.47236	5.50827	-0.2673	0.789239	NA	ENSMUSG00000112841	NA	AC164567.5	10	88602472	88605340	1	TEC		NA	NA	NA	ENSMUSG00000112841
ENSMUSG00000112326	0.107742	-1.47236	5.50827	-0.2673	0.789239	NA	ENSMUSG00000112326	NA	AC122408.2	10	85829742	85833315	1	unprocessed_pseudogene		NA	NA	NA	ENSMUSG00000112326
ENSMUSG00000105203	0.142778	-1.47235	5.50827	-0.267297	0.78924	NA	ENSMUSG00000105203	NA	4933428P19Rik	10	62577694	62579069	1	antisense_RNA	RIKEN cDNA 4933428P19 gene [Source:MGI Symbol;Acc:MGI:1918479]	NA	NA	NA	ENSMUSG00000105203
ENSMUSG00000104935	0.138118	-1.47235	5.50827	-0.267297	0.78924	NA	ENSMUSG00000104935	NA	Gm43414	3	37708021	37711208	1	TEC	predicted gene 43414 [Source:MGI Symbol;Acc:MGI:5663551]	NA	NA	NA	ENSMUSG00000104935
ENSMUSG00000109727	2.3131	-1.47219	0.809898	-1.81775	0.069103	1	ENSMUSG00000109727	NA	Gm45464	8	91113762	91116671	-1	sense_intronic	predicted gene 45464 [Source:MGI Symbol;Acc:MGI:5791300]	NA	NA	NA	ENSMUSG00000109727
ENSMUSG00000113980	1.78282	-1.46963	1.29402	-1.13571	0.25608	1	ENSMUSG00000113980	NA	AC123920.1	13	70007231	70007614	-1	processed_pseudogene		NA	NA	NA	ENSMUSG00000113980
ENSMUSG00000102133	1.24018	-1.46886	1.00019	-1.46858	0.141948	1	ENSMUSG00000102133	NA	Gm37106	1	177045242	177046773	-1	TEC	predicted gene, 37106 [Source:MGI Symbol;Acc:MGI:5610334]	NA	NA	NA	ENSMUSG00000102133
ENSMUSG00000115771	3.19772	-1.46792	0.827004	-1.77499	0.0758997	1	ENSMUSG00000115771	NA	NA	NA	NA	NA	NA	NA	NA	NA	NA	NA	ENSMUSG00000115771
ENSMUSG00000079654	1.23143	-1.46717	1.09008	-1.34593	0.178324	1	ENSMUSG00000079654	101359	Prrt4	6	29169232	29179584	-1	protein_coding	proline-rich transmembrane protein 4 [Source:MGI Symbol;Acc:MGI:2141677]	NA	NA	NA	ENSMUSG00000079654
ENSMUSG00000034656	95.3614	-1.46664	0.76997	-1.9048	0.0568063	1	ENSMUSG00000034656	12286	Cacna1a	8	84388440	84640246	1	protein_coding	calcium channel, voltage-dependent, P/Q type, alpha 1A subunit [Source:MGI Symbol;Acc:MGI:109482]	NA	NA	NA	ENSMUSG00000034656
ENSMUSG00000056222	0.651022	-1.46641	1.73753	-0.843964	0.39869	NA	ENSMUSG00000056222	20745	Spock1	13	57421195	57908332	-1	protein_coding	sparc/osteonectin, cwcv and kazal-like domains proteoglycan 1 [Source:MGI Symbol;Acc:MGI:105371]	NA	NA	NA	ENSMUSG00000056222
ENSMUSG00000007034	4.11604	-1.46408	1.18247	-1.23816	0.215658	1	ENSMUSG00000007034	70129	Slc44a4	17	34914466	34930436	1	protein_coding	solute carrier family 44, member 4 [Source:MGI Symbol;Acc:MGI:1917379]	transporter(PC00227)	NA	NA	ENSMUSG00000007034
ENSMUSG00000097597	0.75784	-1.46385	1.34566	-1.08783	0.276671	NA	ENSMUSG00000097597	NA	Gm26674	10	8884637	8886878	1	antisense_RNA	predicted gene, 26674 [Source:MGI Symbol;Acc:MGI:5477168]	NA	NA	NA	ENSMUSG00000097597
ENSMUSG00000013158	0.456285	-1.46339	2.16444	-0.676106	0.498973	NA	ENSMUSG00000013158	71046	4933405L10Rik	8	105707655	105710246	1	protein_coding	RIKEN cDNA 4933405L10 gene [Source:MGI Symbol;Acc:MGI:1918296]	NA	NA	NA	ENSMUSG00000013158
ENSMUSG00000091955	1.93424	-1.46107	1.42769	-1.02338	0.306128	1	ENSMUSG00000091955	NA	Gm9844	7	24862213	24862697	1	protein_coding	predicted pseudogene 9844 [Source:MGI Symbol;Acc:MGI:3704288]	NA	NA	NA	ENSMUSG00000091955
ENSMUSG00000062073	1.47414	-1.46097	1.20811	-1.2093	0.226547	1	ENSMUSG00000062073	NA	Gm10109	7	44221017	44227421	-1	transcribed_unprocessed_pseudogene	predicted gene 10109 [Source:MGI Symbol;Acc:MGI:3647742]	NA	NA	NA	ENSMUSG00000062073
ENSMUSG00000112399	3.08556	-1.46094	1.20057	-1.21687	0.223653	1	ENSMUSG00000112399	NA	AC132139.2	10	117559099	117560423	1	lincRNA		NA	NA	NA	ENSMUSG00000112399
ENSMUSG00000112515	0.33246	-1.46029	2.61861	-0.557658	0.577078	NA	ENSMUSG00000112515	NA	AC122235.1	12	10723657	10724506	-1	processed_pseudogene		NA	NA	NA	ENSMUSG00000112515
ENSMUSG00000104676	0.331649	-1.46028	2.62175	-0.556985	0.577537	NA	ENSMUSG00000104676	NA	Gm42777	3	121755044	121758646	-1	TEC	predicted gene 42777 [Source:MGI Symbol;Acc:MGI:5662914]	NA	NA	NA	ENSMUSG00000104676
ENSMUSG00000097453	0.268809	-1.45961	3.33608	-0.437523	0.661732	NA	ENSMUSG00000097453	NA	Gm26894	5	28466374	28480973	1	lincRNA	predicted gene, 26894 [Source:MGI Symbol;Acc:MGI:5477388]	NA	NA	NA	ENSMUSG00000097453
ENSMUSG00000112033	0.334371	-1.459	2.93526	-0.497061	0.619146	NA	ENSMUSG00000112033	NA	AC125020.2	12	31747325	31747672	1	processed_pseudogene		NA	NA	NA	ENSMUSG00000112033
ENSMUSG00000097025	0.307349	-1.4589	2.96582	-0.491906	0.622786	NA	ENSMUSG00000097025	NA	Gm26558	2	70661248	70662108	-1	protein_coding	predicted gene, 26558 [Source:MGI Symbol;Acc:MGI:5477052]	NA	NA	NA	ENSMUSG00000097025
ENSMUSG00000100552	2.04735	-1.45876	1.73895	-0.838875	0.40154	1	ENSMUSG00000100552	NA	Gm29019	15	82982725	82987830	-1	lincRNA	predicted gene 29019 [Source:MGI Symbol;Acc:MGI:5579725]	NA	NA	NA	ENSMUSG00000100552
ENSMUSG00000100648	3.02987	-1.45874	1.04037	-1.40213	0.160876	1	ENSMUSG00000100648	NA	Gm28659	1	10868688	10869446	1	processed_pseudogene	predicted gene 28659 [Source:MGI Symbol;Acc:MGI:5579365]	NA	NA	NA	ENSMUSG00000100648
ENSMUSG00000104686	2.18228	-1.457	0.884751	-1.6468	0.0996	1	ENSMUSG00000104686	NA	Gm42815	5	138619288	138620757	1	TEC	predicted gene 42815 [Source:MGI Symbol;Acc:MGI:5662952]	NA	NA	NA	ENSMUSG00000104686
ENSMUSG00000104850	0.201268	-1.4565	4.24667	-0.342976	0.731617	NA	ENSMUSG00000104850	NA	Gm42901	3	53038585	53041755	-1	antisense_RNA	predicted gene 42901 [Source:MGI Symbol;Acc:MGI:5663038]	NA	NA	NA	ENSMUSG00000104850
ENSMUSG00000110731	0.199205	-1.4565	4.25438	-0.342352	0.732086	NA	ENSMUSG00000110731	NA	AC118750.1	10	36391592	36396928	1	lincRNA		NA	NA	NA	ENSMUSG00000110731
ENSMUSG00000115512	1.19568	-1.45635	1.37472	-1.05938	0.289429	1	ENSMUSG00000115512	NA	NA	NA	NA	NA	NA	NA	NA	NA	NA	NA	ENSMUSG00000115512
ENSMUSG00000101439	0.261998	-1.45586	4.99675	-0.291362	0.770774	NA	ENSMUSG00000101439	NA	Gm336	19	11090598	11092077	-1	processed_pseudogene	predicted pseudogene 336 [Source:MGI Symbol;Acc:MGI:2685182]	NA	NA	NA	ENSMUSG00000101439
ENSMUSG00000060787	0.203311	-1.45576	5.18337	-0.280851	0.778825	NA	ENSMUSG00000060787	258407	Olfr464	11	87913268	87920967	-1	protein_coding	olfactory receptor 464 [Source:MGI Symbol;Acc:MGI:3030298]	NA	NA	NA	ENSMUSG00000060787
ENSMUSG00000096299	2.09451	-1.45571	1.90617	-0.763679	0.445058	1	ENSMUSG00000096299	NA	Gm21814	6	149566090	149583656	1	lincRNA	predicted gene, 21814 [Source:MGI Symbol;Acc:MGI:5433978]	NA	NA	NA	ENSMUSG00000096299
ENSMUSG00000110495	0.163209	-1.45566	5.37221	-0.27096	0.786422	NA	ENSMUSG00000110495	NA	Gm45879	18	70432355	70433856	-1	unitary_pseudogene	predicted gene 45879 [Source:MGI Symbol;Acc:MGI:5804994]	NA	NA	NA	ENSMUSG00000110495
ENSMUSG00000108035	0.0770158	-1.45561	5.50842	-0.264252	0.791586	NA	ENSMUSG00000108035	NA	Gm44021	6	148361141	148364656	-1	TEC	predicted gene, 44021 [Source:MGI Symbol;Acc:MGI:5690413]	NA	NA	NA	ENSMUSG00000108035
ENSMUSG00000110391	0.0770158	-1.45561	5.50842	-0.264252	0.791586	NA	ENSMUSG00000110391	NA	Gm7269	10	112008922	112049286	-1	unprocessed_pseudogene	predicted gene 7269 [Source:MGI Symbol;Acc:MGI:3647515]	NA	NA	NA	ENSMUSG00000110391
ENSMUSG00000112714	0.106694	-1.4556	5.50842	-0.264251	0.791587	NA	ENSMUSG00000112714	NA	AC127224.2	10	71704290	71705988	1	processed_pseudogene		NA	NA	NA	ENSMUSG00000112714
ENSMUSG00000026156	0.106264	-1.4556	5.50842	-0.26425	0.791587	NA	ENSMUSG00000026156	280645	B3gat2	1	23761753	23849158	1	protein_coding	beta-1,3-glucuronyltransferase 2 (glucuronosyltransferase S) [Source:MGI Symbol;Acc:MGI:2389490]	glycosyltransferase(PC00111)	NA	NA	ENSMUSG00000026156
ENSMUSG00000110708	0.114347	-1.4556	5.50842	-0.26425	0.791587	NA	ENSMUSG00000110708	NA	Gnb1-ps3	8	94760288	94761237	1	processed_pseudogene	guanine nucleotide binding protein (G protein), beta 1, pseudogene 3 [Source:MGI Symbol;Acc:MGI:2668078]	NA	NA	NA	ENSMUSG00000110708
ENSMUSG00000100004	0.139184	-1.45559	5.50842	-0.264249	0.791588	NA	ENSMUSG00000100004	494546	Taar8c	10	24100878	24101912	-1	protein_coding	trace amine-associated receptor 8C [Source:MGI Symbol;Acc:MGI:3527452]	NA	NA	NA	ENSMUSG00000100004
ENSMUSG00000103415	0.137926	-1.45559	5.50842	-0.264249	0.791588	NA	ENSMUSG00000103415	NA	Gm37339	1	183371076	183371467	1	processed_pseudogene	predicted gene, 37339 [Source:MGI Symbol;Acc:MGI:5610567]	NA	NA	NA	ENSMUSG00000103415
ENSMUSG00000075115	0.134121	-1.45559	5.50842	-0.264248	0.791588	NA	ENSMUSG00000075115	257887	Olfr1200	2	88763511	88770488	-1	protein_coding	olfactory receptor 1200 [Source:MGI Symbol;Acc:MGI:3031034]	NA	NA	NA	ENSMUSG00000075115
ENSMUSG00000051920	0.383622	-1.45398	2.18443	-0.66561	0.50566	NA	ENSMUSG00000051920	239405	Rspo2	15	43020811	43170818	-1	protein_coding	R-spondin 2 [Source:MGI Symbol;Acc:MGI:1922667]	NA	NA	NA	ENSMUSG00000051920
ENSMUSG00000064427	1.97727	-1.4532	1.15448	-1.25875	0.208121	1	ENSMUSG00000064427	NA	Gm22748	12	17546146	17546281	1	snoRNA	predicted gene, 22748 [Source:MGI Symbol;Acc:MGI:5452525]	NA	NA	NA	ENSMUSG00000064427
ENSMUSG00000098779	0.188987	-1.45284	5.22018	-0.278312	0.780773	NA	ENSMUSG00000098779	NA	Gm8602	6	4359028	4359634	1	processed_pseudogene	predicted gene 8602 [Source:MGI Symbol;Acc:MGI:3805954]	NA	NA	NA	ENSMUSG00000098779
ENSMUSG00000080783	1.10371	-1.45253	1.48015	-0.981338	0.326426	1	ENSMUSG00000080783	NA	Gm8250	19	18581455	18582228	1	processed_pseudogene	predicted gene 8250 [Source:MGI Symbol;Acc:MGI:3647615]	NA	NA	NA	ENSMUSG00000080783
ENSMUSG00000023999	0.68694	-1.45228	3.19045	-0.455196	0.648968	NA	ENSMUSG00000023999	319991	Kif6	17	49615136	49909847	1	protein_coding	kinesin family member 6 [Source:MGI Symbol;Acc:MGI:1098238]	microtubule binding motor protein(PC00156)	NA	NA	ENSMUSG00000023999
ENSMUSG00000104781	0.895272	-1.45227	1.35754	-1.06978	0.284719	NA	ENSMUSG00000104781	NA	Gm43303	5	45192669	45251929	-1	lincRNA	predicted gene 43303 [Source:MGI Symbol;Acc:MGI:5663440]	NA	NA	NA	ENSMUSG00000104781
ENSMUSG00000024734	1.53877	-1.45183	1.62732	-0.892157	0.372309	1	ENSMUSG00000024734	22786	Zp1	19	10914287	10920632	-1	protein_coding	zona pellucida glycoprotein 1 [Source:MGI Symbol;Acc:MGI:103073]	NA	NA	NA	ENSMUSG00000024734
ENSMUSG00000105935	1.12687	-1.45132	1.32267	-1.09726	0.272526	1	ENSMUSG00000105935	NA	Gm43628	5	65307808	65308994	-1	TEC	predicted gene 43628 [Source:MGI Symbol;Acc:MGI:5663765]	NA	NA	NA	ENSMUSG00000105935
ENSMUSG00000058244	0.805013	-1.44829	1.38179	-1.04813	0.294579	NA	ENSMUSG00000058244	258215	Olfr506	7	108610787	108615340	1	protein_coding	olfactory receptor 506 [Source:MGI Symbol;Acc:MGI:3030340]	NA	NA	NA	ENSMUSG00000058244
ENSMUSG00000115289	1.19756	-1.44673	1.23547	-1.171	0.2416	1	ENSMUSG00000115289	NA	NA	NA	NA	NA	NA	NA	NA	NA	NA	NA	ENSMUSG00000115289
ENSMUSG00000026023	2.61731	-1.44647	1.12254	-1.28857	0.197549	1	ENSMUSG00000026023	271697	Cdk15	1	59256906	59352993	1	protein_coding	cyclin-dependent kinase 15 [Source:MGI Symbol;Acc:MGI:3583944]	non-receptor serine/threonine protein kinase(PC00167)	non-receptor tyrosine protein kinase(PC00168)	NA	ENSMUSG00000026023
ENSMUSG00000097594	0.368279	-1.44586	3.44523	-0.41967	0.674727	NA	ENSMUSG00000097594	NA	Gm2907	14	3876445	3877636	-1	processed_pseudogene	predicted gene 2907 [Source:MGI Symbol;Acc:MGI:3781085]	NA	NA	NA	ENSMUSG00000097594
ENSMUSG00000028539	1.51604	-1.44569	1.66091	-0.87042	0.384071	1	ENSMUSG00000028539	11876	Artn	4	117926162	117929763	-1	protein_coding	artemin [Source:MGI Symbol;Acc:MGI:1333791]	neurotrophic factor(PC00163)	NA	NA	ENSMUSG00000028539
ENSMUSG00000042306	1.21371	-1.44501	1.56019	-0.926173	0.354356	1	ENSMUSG00000042306	66166	S100a14	3	90526856	90528837	1	protein_coding	S100 calcium binding protein A14 [Source:MGI Symbol;Acc:MGI:1913416]	calmodulin(PC00061)	signaling molecule(PC00207)	NA	ENSMUSG00000042306
ENSMUSG00000097430	1.44031	-1.44383	0.973823	-1.48265	0.138169	1	ENSMUSG00000097430	NA	Gm10544	18	37159854	37178522	-1	processed_transcript	predicted gene 10544 [Source:MGI Symbol;Acc:MGI:3642892]	NA	NA	NA	ENSMUSG00000097430
ENSMUSG00000036251	0.0741986	-1.44347	5.50851	-0.262044	0.793288	NA	ENSMUSG00000036251	171382	Trpm8	1	88277661	88389293	1	protein_coding	transient receptor potential cation channel, subfamily M, member 8 [Source:MGI Symbol;Acc:MGI:2181435]	ion channel(PC00133)	receptor(PC00197)	NA	ENSMUSG00000036251
ENSMUSG00000103442	0.0741986	-1.44347	5.50851	-0.262044	0.793288	NA	ENSMUSG00000103442	116731	Pcdha1	18	36930184	37187661	1	protein_coding	protocadherin alpha 1 [Source:MGI Symbol;Acc:MGI:2150982]	NA	NA	NA	ENSMUSG00000103442
ENSMUSG00000107696	0.134462	-1.44345	5.50851	-0.262041	0.79329	NA	ENSMUSG00000107696	NA	Gm44171	6	101538753	101540861	1	TEC	predicted gene, 44171 [Source:MGI Symbol;Acc:MGI:5690563]	NA	NA	NA	ENSMUSG00000107696
ENSMUSG00000050550	0.137507	-1.44345	5.50851	-0.26204	0.79329	NA	ENSMUSG00000050550	NA	Gm11868	4	18844202	18845679	-1	processed_pseudogene	predicted gene 11868 [Source:MGI Symbol;Acc:MGI:3650507]	NA	NA	NA	ENSMUSG00000050550
ENSMUSG00000109021	0.138499	-1.44345	5.50851	-0.26204	0.79329	NA	ENSMUSG00000109021	NA	Gm44812	7	70574834	70585751	1	lincRNA	predicted gene 44812 [Source:MGI Symbol;Acc:MGI:5753388]	NA	NA	NA	ENSMUSG00000109021
ENSMUSG00000061974	0.173752	-1.44344	5.50851	-0.262039	0.793291	NA	ENSMUSG00000061974	100039801	Cldn24	8	47822143	47822805	1	protein_coding	claudin 24 [Source:MGI Symbol;Acc:MGI:3712484]	tight junction(PC00214)	NA	NA	ENSMUSG00000061974
ENSMUSG00000095419	0.171069	-1.44344	5.50851	-0.262039	0.793291	NA	ENSMUSG00000095419	NA	Gm14328	18	74303524	74303931	-1	processed_pseudogene	predicted gene 14328 [Source:MGI Symbol;Acc:MGI:3651951]	NA	NA	NA	ENSMUSG00000095419
ENSMUSG00000020169	0.87219	-1.4427	1.32045	-1.09259	0.274576	NA	ENSMUSG00000020169	382427	Best3	10	116986314	117025040	1	protein_coding	bestrophin 3 [Source:MGI Symbol;Acc:MGI:3580298]	anion channel(PC00049)	NA	NA	ENSMUSG00000020169
ENSMUSG00000078625	0.521694	-1.44268	1.60154	-0.900809	0.36769	NA	ENSMUSG00000078625	381536	Gm12789	4	101986626	101990053	1	protein_coding	predicted gene 12789 [Source:MGI Symbol;Acc:MGI:3649399]	NA	NA	NA	ENSMUSG00000078625
ENSMUSG00000092111	0.522251	-1.44214	1.86172	-0.774627	0.43856	NA	ENSMUSG00000092111	434701	Vmn2r113	17	22943184	22958814	1	protein_coding	vomeronasal 2, receptor 113 [Source:MGI Symbol;Acc:MGI:3648972]	G-protein coupled receptor(PC00021)	ionotropic glutamate receptor(PC00134)	NA	ENSMUSG00000092111
ENSMUSG00000027470	0.6771	-1.44128	1.88714	-0.763739	0.445023	NA	ENSMUSG00000027470	228785	Mylk2	2	152911352	152923068	1	protein_coding	myosin, light polypeptide kinase 2, skeletal muscle [Source:MGI Symbol;Acc:MGI:2139434]	NA	NA	NA	ENSMUSG00000027470
ENSMUSG00000090021	0.718735	-1.44114	1.66719	-0.86441	0.387363	NA	ENSMUSG00000090021	NA	Gm6493	16	23014208	23017038	-1	unprocessed_pseudogene	predicted gene 6493 [Source:MGI Symbol;Acc:MGI:3644797]	NA	NA	NA	ENSMUSG00000090021
ENSMUSG00000083474	4.02826	-1.44102	1.6372	-0.880174	0.378765	1	ENSMUSG00000083474	NA	Gm15267	X	152043049	152043512	-1	processed_pseudogene	predicted gene 15267 [Source:MGI Symbol;Acc:MGI:3705447]	NA	NA	NA	ENSMUSG00000083474
ENSMUSG00000085043	0.702537	-1.43879	1.55244	-0.926796	0.354033	NA	ENSMUSG00000085043	NA	Gm13184	2	3468613	3474546	1	antisense_RNA	predicted gene 13184 [Source:MGI Symbol;Acc:MGI:3649660]	NA	NA	NA	ENSMUSG00000085043
ENSMUSG00000081593	1.78722	-1.43747	1.76925	-0.812478	0.416517	1	ENSMUSG00000081593	NA	Gm11841	4	12125290	12127252	1	processed_pseudogene	predicted gene 11841 [Source:MGI Symbol;Acc:MGI:3651164]	NA	NA	NA	ENSMUSG00000081593
ENSMUSG00000085867	0.485722	-1.43444	1.84936	-0.77564	0.437961	NA	ENSMUSG00000085867	NA	Gm5834	1	139939601	139994205	-1	unprocessed_pseudogene	predicted pseudogene 5834 [Source:MGI Symbol;Acc:MGI:3643955]	NA	NA	NA	ENSMUSG00000085867
ENSMUSG00000004328	11.6166	-1.4344	0.614745	-2.33332	0.0196311	1	ENSMUSG00000004328	53417	Hif3a	7	17031507	17062427	-1	protein_coding	hypoxia inducible factor 3, alpha subunit [Source:MGI Symbol;Acc:MGI:1859778]	basic helix-loop-helix transcription factor(PC00055)	nucleic acid binding(PC00171)	NA	ENSMUSG00000004328
ENSMUSG00000087055	2.65708	-1.43306	0.813854	-1.76083	0.0782664	1	ENSMUSG00000087055	NA	Gm11948	11	3353573	3354911	-1	sense_intronic	predicted gene 11948 [Source:MGI Symbol;Acc:MGI:3650068]	NA	NA	NA	ENSMUSG00000087055
ENSMUSG00000097156	0.826933	-1.43112	1.45951	-0.980545	0.326817	NA	ENSMUSG00000097156	NA	Gm3764	3	88206813	88229959	1	lincRNA	predicted gene 3764 [Source:MGI Symbol;Acc:MGI:3781938]	NA	NA	NA	ENSMUSG00000097156
ENSMUSG00000100255	0.611989	-1.43072	1.69193	-0.845614	0.397768	NA	ENSMUSG00000100255	NA	Gm28196	2	129948568	129949207	1	lincRNA	predicted gene 28196 [Source:MGI Symbol;Acc:MGI:5578902]	NA	NA	NA	ENSMUSG00000100255
ENSMUSG00000071532	274.368	-1.4303	1.40529	-1.0178	0.308774	1	ENSMUSG00000071532	NA	Gm10335	10	14523078	14523545	1	processed_pseudogene	predicted gene 10335 [Source:MGI Symbol;Acc:MGI:3641693]	NA	NA	NA	ENSMUSG00000071532
ENSMUSG00000044716	0.512856	-1.42972	1.71565	-0.833339	0.404654	NA	ENSMUSG00000044716	231134	Dok7	5	35056766	35087839	1	protein_coding	docking protein 7 [Source:MGI Symbol;Acc:MGI:3584043]	NA	NA	NA	ENSMUSG00000044716
ENSMUSG00000093031	6.17411	-1.42561	1.27019	-1.12236	0.26171	1	ENSMUSG00000093031	NA	Gm22662	4	133654002	133654257	1	misc_RNA	predicted gene, 22662 [Source:MGI Symbol;Acc:MGI:5452439]	NA	NA	NA	ENSMUSG00000093031
ENSMUSG00000076914	0.997718	-1.424	1.1718	-1.21522	0.224283	1	ENSMUSG00000076914	NA	Traj15	14	54204422	54204481	1	TR_J_gene	T cell receptor alpha joining 15 [Source:MGI Symbol;Acc:MGI:4439582]	NA	NA	NA	ENSMUSG00000076914
ENSMUSG00000101942	0.827507	-1.42395	1.12561	-1.26505	0.205854	NA	ENSMUSG00000101942	NA	Gm19582	1	87853347	87854299	-1	antisense_RNA	predicted gene, 19582 [Source:MGI Symbol;Acc:MGI:5011767]	NA	NA	NA	ENSMUSG00000101942
ENSMUSG00000059022	3.50768	-1.42387	0.921045	-1.54593	0.122122	1	ENSMUSG00000059022	333088	Kcp	6	29473162	29507952	-1	protein_coding	kielin/chordin-like protein [Source:MGI Symbol;Acc:MGI:2141640]	NA	NA	NA	ENSMUSG00000059022
ENSMUSG00000021209	18.9635	-1.42248	0.651999	-2.18172	0.0291305	1	ENSMUSG00000021209	74521	Ppp4r4	12	103532283	103613831	1	protein_coding	protein phosphatase 4, regulatory subunit 4 [Source:MGI Symbol;Acc:MGI:1921771]	NA	NA	NA	ENSMUSG00000021209
ENSMUSG00000036545	311.479	-1.42159	0.731872	-1.94241	0.0520875	1	ENSMUSG00000036545	216725	Adamts2	11	50602084	50807573	1	protein_coding	a disintegrin-like and metallopeptidase (reprolysin type) with thrombospondin type 1 motif, 2 [Source:MGI Symbol;Acc:MGI:1347356]	extracellular matrix glycoprotein(PC00100)	metalloprotease(PC00153)	serine protease inhibitor(PC00204)	ENSMUSG00000036545
ENSMUSG00000008601	9.0201	-1.42094	1.06663	-1.33217	0.182803	1	ENSMUSG00000008601	53868	Rab25	3	88542029	88548300	-1	protein_coding	RAB25, member RAS oncogene family [Source:MGI Symbol;Acc:MGI:1858203]	NA	NA	NA	ENSMUSG00000008601
ENSMUSG00000047361	0.508763	-1.4199	2.14411	-0.662235	0.50782	NA	ENSMUSG00000047361	381260	Gm973	1	59516264	59636417	1	protein_coding	predicted gene 973 [Source:MGI Symbol;Acc:MGI:2685819]	NA	NA	NA	ENSMUSG00000047361
ENSMUSG00000039155	4.75848	-1.41717	1.08659	-1.30424	0.192152	1	ENSMUSG00000039155	381409	Cdh26	2	178430531	178487366	1	protein_coding	cadherin-like 26 [Source:MGI Symbol;Acc:MGI:2685856]	NA	NA	NA	ENSMUSG00000039155
ENSMUSG00000113175	5.51334	-1.41611	0.519415	-2.72635	0.00640394	0.9766	ENSMUSG00000113175	NA	AC117226.2	13	4350397	4391265	-1	transcribed_unprocessed_pseudogene		NA	NA	NA	ENSMUSG00000113175
ENSMUSG00000096964	0.487709	-1.41176	1.58105	-0.892926	0.371897	NA	ENSMUSG00000096964	NA	Gm6345	1	170254049	170255739	-1	transcribed_unprocessed_pseudogene	predicted gene 6345 [Source:MGI Symbol;Acc:MGI:3647370]	NA	NA	NA	ENSMUSG00000096964
ENSMUSG00000097806	0.32925	-1.41165	2.82025	-0.500539	0.616696	NA	ENSMUSG00000097806	NA	Gm6556	13	15440302	15463736	-1	processed_transcript	predicted gene 6556 [Source:MGI Symbol;Acc:MGI:3647197]	NA	NA	NA	ENSMUSG00000097806
ENSMUSG00000025644	0.670508	-1.41027	1.31734	-1.07054	0.284375	NA	ENSMUSG00000025644	NA	Gm7628	9	109093844	109097796	-1	antisense_RNA	predicted gene 7628 [Source:MGI Symbol;Acc:MGI:3643956]	NA	NA	NA	ENSMUSG00000025644
ENSMUSG00000045281	0.998498	-1.40912	1.03405	-1.36272	0.172972	1	ENSMUSG00000045281	239530	Gpr20	15	73694604	73707505	-1	protein_coding	G protein-coupled receptor 20 [Source:MGI Symbol;Acc:MGI:2441803]	NA	NA	NA	ENSMUSG00000045281
ENSMUSG00000108955	5.25508	-1.40844	0.633034	-2.2249	0.0260877	1	ENSMUSG00000108955	NA	Gm44775	8	3458039	3459494	1	TEC	predicted gene 44775 [Source:MGI Symbol;Acc:MGI:5753351]	NA	NA	NA	ENSMUSG00000108955
ENSMUSG00000010136	0.848463	-1.40755	1.23499	-1.13973	0.254399	NA	ENSMUSG00000010136	100503311	Pifo	3	105996957	106014646	-1	protein_coding	primary cilia formation [Source:MGI Symbol;Acc:MGI:1923670]	NA	NA	NA	ENSMUSG00000010136
ENSMUSG00000044647	0.18492	-1.40591	5.48633	-0.256257	0.797753	NA	ENSMUSG00000044647	77771	Csrnp3	2	65845767	66031546	1	protein_coding	cysteine-serine-rich nuclear protein 3 [Source:MGI Symbol;Acc:MGI:1925021]	NA	NA	NA	ENSMUSG00000044647
ENSMUSG00000025983	2.22176	-1.4049	0.941538	-1.49213	0.135665	1	ENSMUSG00000025983	78016	Ccdc150	1	54250683	54368727	1	protein_coding	coiled-coil domain containing 150 [Source:MGI Symbol;Acc:MGI:1925266]	NA	NA	NA	ENSMUSG00000025983
ENSMUSG00000109593	0.573761	-1.40473	1.53438	-0.915507	0.359926	NA	ENSMUSG00000109593	NA	Gm45431	8	80128194	80138667	-1	lincRNA	predicted gene 45431 [Source:MGI Symbol;Acc:MGI:5791267]	NA	NA	NA	ENSMUSG00000109593
ENSMUSG00000093650	1.12631	-1.39933	1.43343	-0.976208	0.328961	1	ENSMUSG00000093650	NA	Gm20631	1	150625266	150783499	1	antisense_RNA	predicted gene 20631 [Source:MGI Symbol;Acc:MGI:5313078]	NA	NA	NA	ENSMUSG00000093650
ENSMUSG00000106447	2.25778	-1.3991	1.01533	-1.37797	0.168213	1	ENSMUSG00000106447	NA	Gm42957	3	96635474	96653101	1	protein_coding	predicted gene 42957 [Source:MGI Symbol;Acc:MGI:5663094]	NA	NA	NA	ENSMUSG00000106447
ENSMUSG00000097322	2.17574	-1.39793	0.804007	-1.7387	0.0820871	1	ENSMUSG00000097322	NA	A530083I20Rik	9	122885080	122903531	-1	processed_transcript	RIKEN cDNA A530083I20 gene [Source:MGI Symbol;Acc:MGI:3040711]	NA	NA	NA	ENSMUSG00000097322
ENSMUSG00000114551	6.17299	-1.39592	0.630378	-2.21441	0.0268003	1	ENSMUSG00000114551	NA	CT025555.1	13	115528556	115529772	-1	processed_pseudogene		NA	NA	NA	ENSMUSG00000114551
ENSMUSG00000058260	0.720294	-1.39526	1.75943	-0.793018	0.427767	NA	ENSMUSG00000058260	71907	Serpina9	12	103994743	104013755	-1	protein_coding	serine (or cysteine) peptidase inhibitor, clade A (alpha-1 antiproteinase, antitrypsin), member 9 [Source:MGI Symbol;Acc:MGI:1919157]	serine protease inhibitor(PC00204)	NA	NA	ENSMUSG00000058260
ENSMUSG00000042050	124.882	-1.39514	0.682436	-2.04435	0.040919	1	ENSMUSG00000042050	217935	Wdr60	12	116206262	116263022	-1	protein_coding	WD repeat domain 60 [Source:MGI Symbol;Acc:MGI:2445085]	microtubule family cytoskeletal protein(PC00157)	NA	NA	ENSMUSG00000042050
ENSMUSG00000031364	1.24675	-1.39414	0.871588	-1.59954	0.109701	1	ENSMUSG00000031364	14829	Grpr	X	163513904	163549677	-1	protein_coding	gastrin releasing peptide receptor [Source:MGI Symbol;Acc:MGI:95836]	NA	NA	NA	ENSMUSG00000031364
ENSMUSG00000114767	1.14224	-1.39209	1.59553	-0.87249	0.382941	1	ENSMUSG00000114767	NA	AC125223.2	13	38710054	38908255	1	lincRNA		NA	NA	NA	ENSMUSG00000114767
ENSMUSG00000097961	1.2452	-1.3876	2.3392	-0.593195	0.553051	1	ENSMUSG00000097961	NA	Gm27000	X	88759471	88760312	-1	lincRNA	predicted gene, 27000 [Source:MGI Symbol;Acc:MGI:5504115]	NA	NA	NA	ENSMUSG00000097961
ENSMUSG00000038259	0.698347	-1.38666	1.34144	-1.03371	0.301272	NA	ENSMUSG00000038259	14563	Gdf5	2	155941023	155945367	-1	protein_coding	growth differentiation factor 5 [Source:MGI Symbol;Acc:MGI:95688]	growth factor(PC00112)	NA	NA	ENSMUSG00000038259
ENSMUSG00000117401	15.1308	-1.38399	0.843338	-1.64109	0.100779	1	ENSMUSG00000117401	NA	NA	NA	NA	NA	NA	NA	NA	NA	NA	NA	ENSMUSG00000117401
ENSMUSG00000116445	0.699453	-1.38347	1.35562	-1.02054	0.30747	NA	ENSMUSG00000116445	NA	NA	NA	NA	NA	NA	NA	NA	NA	NA	NA	ENSMUSG00000116445
ENSMUSG00000114139	0.970707	-1.38323	1.34062	-1.03179	0.302173	1	ENSMUSG00000114139	NA	AC134917.4	12	22829733	22833361	-1	unprocessed_pseudogene		NA	NA	NA	ENSMUSG00000114139
ENSMUSG00000102833	0.624488	-1.38102	1.61346	-0.855935	0.392034	NA	ENSMUSG00000102833	NA	Gm9694	1	155973318	155974506	1	TEC	predicted gene 9694 [Source:MGI Symbol;Acc:MGI:3780102]	NA	NA	NA	ENSMUSG00000102833
ENSMUSG00000095195	2.29116	-1.37999	5.37474	-0.256754	NA	NA	ENSMUSG00000095195	NA	Gm3005	14	3428103	3594220	1	protein_coding	predicted gene 3005 [Source:MGI Symbol;Acc:MGI:3781183]	NA	NA	NA	ENSMUSG00000095195
ENSMUSG00000046413	0.823372	-1.37987	1.29332	-1.06692	0.286009	NA	ENSMUSG00000046413	NA	Irx3os	8	91800415	91807539	1	antisense_RNA	iroquois homeobox 3, opposite strand [Source:MGI Symbol;Acc:MGI:2441953]	NA	NA	NA	ENSMUSG00000046413
ENSMUSG00000097626	0.749664	-1.37779	1.76363	-0.781224	0.434671	NA	ENSMUSG00000097626	NA	4921504A21Rik	5	19202368	19226555	-1	antisense_RNA	RIKEN cDNA 4921504A21 gene [Source:MGI Symbol;Acc:MGI:1918082]	NA	NA	NA	ENSMUSG00000097626
ENSMUSG00000105757	0.515082	-1.37725	1.49708	-0.919956	0.357596	NA	ENSMUSG00000105757	NA	Ighv1-83	12	115963817	115964250	-1	IG_V_pseudogene	immunoglobulin heavy variable 1-83 [Source:MGI Symbol;Acc:MGI:3648939]	NA	NA	NA	ENSMUSG00000105757
ENSMUSG00000092572	6.40743	-1.37712	0.500788	-2.7499	0.00596138	0.9766	ENSMUSG00000092572	241197	Serpinb10	1	107529003	107549271	1	polymorphic_pseudogene	serine (or cysteine) peptidase inhibitor, clade B (ovalbumin), member 10 [Source:MGI Symbol;Acc:MGI:2138648]	NA	NA	NA	ENSMUSG00000092572
ENSMUSG00000029102	3.29541	-1.37665	0.782175	-1.76002	0.0784041	1	ENSMUSG00000029102	54426	Hgfac	5	35041509	35048461	1	protein_coding	hepatocyte growth factor activator [Source:MGI Symbol;Acc:MGI:1859281]	serine protease(PC00203)	NA	NA	ENSMUSG00000029102
ENSMUSG00000068579	1.94847	-1.3754	1.55959	-0.881898	0.377832	1	ENSMUSG00000068579	NA	Rpl7a-ps3	15	36308144	36308956	-1	protein_coding	ribosomal protein L7A, pseudogene 3 [Source:MGI Symbol;Acc:MGI:3643413]	NA	NA	NA	ENSMUSG00000068579
ENSMUSG00000085830	0.564146	-1.37458	1.42369	-0.965508	0.33429	NA	ENSMUSG00000085830	NA	Grin1os	2	25291220	25298925	1	antisense_RNA	glutamate receptor, ionotropic, NMDA1 (zeta 1), opposite strand [Source:MGI Symbol;Acc:MGI:2443867]	NA	NA	NA	ENSMUSG00000085830
ENSMUSG00000039496	20.9374	-1.37229	0.61803	-2.22042	0.02639	1	ENSMUSG00000039496	227526	Cdnf	2	3513030	3526376	1	protein_coding	cerebral dopamine neurotrophic factor [Source:MGI Symbol;Acc:MGI:3606576]	NA	NA	NA	ENSMUSG00000039496
ENSMUSG00000051678	1.17729	-1.36837	1.43349	-0.954576	0.339792	1	ENSMUSG00000051678	93877	Pcdhb6	18	37333921	37337674	1	protein_coding	protocadherin beta 6 [Source:MGI Symbol;Acc:MGI:2136740]	NA	NA	NA	ENSMUSG00000051678
ENSMUSG00000001622	4.22159	-1.3634	0.836818	-1.62926	0.103257	1	ENSMUSG00000001622	12994	Csn3	5	87925579	87932665	1	protein_coding	casein kappa [Source:MGI Symbol;Acc:MGI:107461]	NA	NA	NA	ENSMUSG00000001622
ENSMUSG00000085682	3.31792	-1.3627	0.989732	-1.37683	0.168564	1	ENSMUSG00000085682	NA	Gm14267	2	166502101	166505584	-1	lincRNA	predicted gene 14267 [Source:MGI Symbol;Acc:MGI:3649851]	NA	NA	NA	ENSMUSG00000085682
ENSMUSG00000074489	2.42274	-1.3615	1.01393	-1.3428	0.179338	1	ENSMUSG00000074489	12095	Bglap3	3	88368616	88372743	-1	protein_coding	bone gamma-carboxyglutamate protein 3 [Source:MGI Symbol;Acc:MGI:88155]	NA	NA	NA	ENSMUSG00000074489
ENSMUSG00000022176	1.67529	-1.36149	1.06133	-1.28282	0.199556	1	ENSMUSG00000022176	140743	Rem2	14	54476100	54480431	1	protein_coding	rad and gem related GTP binding protein 2 [Source:MGI Symbol;Acc:MGI:2155260]	NA	NA	NA	ENSMUSG00000022176
ENSMUSG00000074715	2.79333	-1.36026	0.791693	-1.71817	0.0857663	1	ENSMUSG00000074715	56838	Ccl28	13	119623819	119654359	1	protein_coding	chemokine (C-C motif) ligand 28 [Source:MGI Symbol;Acc:MGI:1861731]	NA	NA	NA	ENSMUSG00000074715
ENSMUSG00000103148	2.20953	-1.35924	0.829199	-1.63922	0.101168	1	ENSMUSG00000103148	NA	Gm37746	3	43955721	43955918	1	TEC	predicted gene, 37746 [Source:MGI Symbol;Acc:MGI:5610974]	NA	NA	NA	ENSMUSG00000103148
ENSMUSG00000116836	0.759513	-1.35662	1.36085	-0.996894	0.318816	NA	ENSMUSG00000116836	NA	NA	NA	NA	NA	NA	NA	NA	NA	NA	NA	ENSMUSG00000116836
ENSMUSG00000107591	4.47659	-1.35577	0.829319	-1.6348	0.102091	1	ENSMUSG00000107591	NA	Gm6794	6	66711691	66712147	1	processed_pseudogene	predicted gene 6794 [Source:MGI Symbol;Acc:MGI:3646483]	NA	NA	NA	ENSMUSG00000107591
ENSMUSG00000114753	1.07077	-1.35565	1.17753	-1.15126	0.249624	1	ENSMUSG00000114753	NA	AC127597.1	14	26315011	26324954	-1	lincRNA		NA	NA	NA	ENSMUSG00000114753
ENSMUSG00000028012	1.86683	-1.35525	1.12548	-1.20415	0.228533	1	ENSMUSG00000028012	20132	Rrh	3	129804408	129822587	-1	protein_coding	retinal pigment epithelium derived rhodopsin homolog [Source:MGI Symbol;Acc:MGI:1097709]	G-protein coupled receptor(PC00021)	NA	NA	ENSMUSG00000028012
ENSMUSG00000097879	2.03193	-1.35415	0.939828	-1.44085	0.149628	1	ENSMUSG00000097879	NA	Gm26869	2	178023808	178028736	-1	lincRNA	predicted gene, 26869 [Source:MGI Symbol;Acc:MGI:5477363]	NA	NA	NA	ENSMUSG00000097879
ENSMUSG00000016179	3.09483	-1.35377	0.791385	-1.71063	0.0871489	1	ENSMUSG00000016179	215303	Camk1g	1	193346346	193370298	-1	protein_coding	calcium/calmodulin-dependent protein kinase I gamma [Source:MGI Symbol;Acc:MGI:2388073]	non-receptor serine/threonine protein kinase(PC00167)	NA	NA	ENSMUSG00000016179
ENSMUSG00000089661	6.98339	-1.35145	2.37565	-0.568877	0.56944	1	ENSMUSG00000089661	12587	Mia	7	27179742	27181157	-1	protein_coding	melanoma inhibitory activity [Source:MGI Symbol;Acc:MGI:109615]	NA	NA	NA	ENSMUSG00000089661
ENSMUSG00000076802	2.68719	-1.35086	0.716355	-1.88574	0.0593302	1	ENSMUSG00000076802	NA	Trav6n-6	14	53132679	53133137	1	TR_V_gene	T cell receptor alpha variable 6N-6 [Source:MGI Symbol;Acc:MGI:3642618]	immunoglobulin(PC00123)	NA	NA	ENSMUSG00000076802
ENSMUSG00000048230	0.641414	-1.34993	3.24237	-0.416342	0.67716	NA	ENSMUSG00000048230	78803	Fbxo43	15	36150060	36164884	-1	protein_coding	F-box protein 43 [Source:MGI Symbol;Acc:MGI:1926053]	NA	NA	NA	ENSMUSG00000048230
ENSMUSG00000085039	20.8982	-1.34929	1.07817	-1.25147	0.210763	1	ENSMUSG00000085039	NA	Gm15927	7	3632114	3644887	-1	processed_transcript	predicted gene 15927 [Source:MGI Symbol;Acc:MGI:3801889]	NA	NA	NA	ENSMUSG00000085039
ENSMUSG00000057605	3.76219	-1.34828	1.0557	-1.27715	0.20155	1	ENSMUSG00000057605	NA	Gm6807	19	45450308	45451195	-1	processed_pseudogene	predicted gene 6807 [Source:MGI Symbol;Acc:MGI:3649145]	NA	NA	NA	ENSMUSG00000057605
ENSMUSG00000045699	4.42774	-1.34801	1.02372	-1.31677	0.187917	1	ENSMUSG00000045699	NA	Gm21411	4	146892406	146909590	-1	protein_coding	predicted gene, 21411 [Source:MGI Symbol;Acc:MGI:5434766]	NA	NA	NA	ENSMUSG00000045699
ENSMUSG00000071332	0.548241	-1.3468	1.83785	-0.732814	0.463672	NA	ENSMUSG00000071332	NA	E230015B07Rik	6	87672382	87681024	1	bidirectional_promoter_lncRNA	RIKEN cDNA E230015B07 gene [Source:MGI Symbol;Acc:MGI:2443140]	NA	NA	NA	ENSMUSG00000071332
ENSMUSG00000113303	1.28528	-1.34246	0.947938	-1.41619	0.156721	1	ENSMUSG00000113303	NA	AC124595.1	12	81781358	81783031	1	bidirectional_promoter_lncRNA		NA	NA	NA	ENSMUSG00000113303
ENSMUSG00000029223	229.159	-1.34058	0.852646	-1.57225	0.115892	1	ENSMUSG00000029223	22223	Uchl1	5	66676091	66687234	1	protein_coding	ubiquitin carboxy-terminal hydrolase L1 [Source:MGI Symbol;Acc:MGI:103149]	cysteine protease(PC00081)	NA	NA	ENSMUSG00000029223
ENSMUSG00000029843	2.84547	-1.33889	0.909083	-1.47279	0.140807	1	ENSMUSG00000029843	243755	Slc13a4	6	35267957	35308131	-1	protein_coding	solute carrier family 13 (sodium/sulfate symporters), member 4 [Source:MGI Symbol;Acc:MGI:2442367]	cation transporter(PC00068)	NA	NA	ENSMUSG00000029843
ENSMUSG00000096106	1.88615	-1.33762	0.796742	-1.67886	0.0931797	1	ENSMUSG00000096106	NA	Trav5d-4	14	53001713	53002232	1	TR_V_gene	T cell receptor alpha variable 5D-4 [Source:MGI Symbol;Acc:MGI:3704130]	immunoglobulin receptor superfamily(PC00124)	NA	NA	ENSMUSG00000096106
ENSMUSG00000109509	3.82791	-1.33711	2.26541	-0.590226	0.555039	1	ENSMUSG00000109509	NA	Rps12-ps4	7	30484701	30485097	-1	processed_pseudogene	ribosomal protein S12, pseudogene 4 [Source:MGI Symbol;Acc:MGI:3780139]	NA	NA	NA	ENSMUSG00000109509
ENSMUSG00000042385	2.35287	-1.33598	0.927162	-1.44093	0.149603	1	ENSMUSG00000042385	14945	Gzmk	13	113171608	113225908	-1	protein_coding	granzyme K [Source:MGI Symbol;Acc:MGI:1298232]	serine protease(PC00203)	NA	NA	ENSMUSG00000042385
ENSMUSG00000094530	2.1533	-1.33329	1.21632	-1.09617	0.273006	1	ENSMUSG00000094530	NA	Gm21399	8	129252998	129253594	1	processed_pseudogene	predicted gene, 21399 [Source:MGI Symbol;Acc:MGI:5434754]	NA	NA	NA	ENSMUSG00000094530
ENSMUSG00000031344	0.854262	-1.33255	1.334	-0.998913	0.317837	NA	ENSMUSG00000031344	57249	Gabrq	X	72825178	72842602	1	protein_coding	gamma-aminobutyric acid (GABA) A receptor, subunit theta [Source:MGI Symbol;Acc:MGI:1888498]	GABA receptor(PC00023)	acetylcholine receptor(PC00037)	NA	ENSMUSG00000031344
ENSMUSG00000036040	21.5344	-1.33121	0.689848	-1.92972	0.0536417	1	ENSMUSG00000036040	77794	Adamtsl2	2	27079379	27108981	1	protein_coding	ADAMTS-like 2 [Source:MGI Symbol;Acc:MGI:1925044]	extracellular matrix glycoprotein(PC00100)	metalloprotease(PC00153)	serine protease inhibitor(PC00204)	ENSMUSG00000036040
ENSMUSG00000053550	3.52322	-1.33108	1.01959	-1.30551	0.19172	1	ENSMUSG00000053550	232813	Shisa7	7	4825552	4844696	-1	protein_coding	shisa family member 7 [Source:MGI Symbol;Acc:MGI:3605641]	NA	NA	NA	ENSMUSG00000053550
ENSMUSG00000110109	4.6861	-1.32654	0.787939	-1.68356	0.0922663	1	ENSMUSG00000110109	NA	Gm5599	7	112972096	112972883	-1	processed_pseudogene	predicted gene 5599 [Source:MGI Symbol;Acc:MGI:3644531]	NA	NA	NA	ENSMUSG00000110109
ENSMUSG00000050366	0.59126	-1.32546	2.38293	-0.556228	0.578055	NA	ENSMUSG00000050366	258055	Olfr524	7	140198499	140205964	-1	protein_coding	olfactory receptor 524 [Source:MGI Symbol;Acc:MGI:3030358]	NA	NA	NA	ENSMUSG00000050366
ENSMUSG00000096649	3.19993	-1.32501	1.45989	-0.907608	0.364085	1	ENSMUSG00000096649	NA	Ighv1-31	12	114829264	114829697	-1	IG_V_gene	immunoglobulin heavy variable 1-31 [Source:MGI Symbol;Acc:MGI:4439889]	NA	NA	NA	ENSMUSG00000096649
ENSMUSG00000107197	1.2581	-1.32488	2.15621	-0.614448	0.538919	1	ENSMUSG00000107197	NA	Gm43312	5	32459828	32462293	1	TEC	predicted gene 43312 [Source:MGI Symbol;Acc:MGI:5663449]	NA	NA	NA	ENSMUSG00000107197
ENSMUSG00000063157	1.03183	-1.32252	1.9043	-0.694491	0.487374	1	ENSMUSG00000063157	12991	Csn2	5	87692624	87699630	-1	protein_coding	casein beta [Source:MGI Symbol;Acc:MGI:88541]	storage protein(PC00210)	NA	NA	ENSMUSG00000063157
ENSMUSG00000076896	0.370646	-1.31765	3.14999	-0.418303	0.675726	NA	ENSMUSG00000076896	NA	Traj33	14	54185358	54185414	1	TR_J_gene	T cell receptor alpha joining 33 [Source:MGI Symbol;Acc:MGI:4439590]	NA	NA	NA	ENSMUSG00000076896
ENSMUSG00000116765	4.66976	-1.31554	0.601123	-2.18847	0.0286353	1	ENSMUSG00000116765	NA	NA	NA	NA	NA	NA	NA	NA	NA	NA	NA	ENSMUSG00000116765
ENSMUSG00000036834	1.20562	-1.31542	1.61818	-0.812901	0.416275	1	ENSMUSG00000036834	269437	Plch1	3	63696234	63899472	-1	protein_coding	phospholipase C, eta 1 [Source:MGI Symbol;Acc:MGI:2683547]	calcium-binding protein(PC00060)	guanyl-nucleotide exchange factor(PC00113)	phospholipase(PC00186)	ENSMUSG00000036834
ENSMUSG00000076858	0.355033	-1.31443	2.92214	-0.449816	0.652843	NA	ENSMUSG00000076858	NA	Trav3-4	14	53776956	53777576	1	TR_V_gene	T cell receptor alpha variable 3-4 [Source:MGI Symbol;Acc:MGI:2684925]	immunoglobulin receptor superfamily(PC00124)	NA	NA	ENSMUSG00000076858
ENSMUSG00000113203	1.8378	-1.31305	1.40115	-0.937125	0.348694	1	ENSMUSG00000113203	NA	CT009757.1	13	63142494	63143934	1	sense_intronic		NA	NA	NA	ENSMUSG00000113203
ENSMUSG00000097346	4.63516	-1.3108	0.723047	-1.81289	0.0698489	1	ENSMUSG00000097346	NA	Gm26619	13	97751112	97760965	1	lincRNA	predicted gene, 26619 [Source:MGI Symbol;Acc:MGI:5477113]	NA	NA	NA	ENSMUSG00000097346
ENSMUSG00000109008	1.32372	-1.3098	0.989435	-1.32378	0.185576	1	ENSMUSG00000109008	NA	Gm44899	7	80980846	80993415	-1	lincRNA	predicted gene 44899 [Source:MGI Symbol;Acc:MGI:5753475]	NA	NA	NA	ENSMUSG00000109008
ENSMUSG00000028132	2.59742	-1.3066	1.33805	-0.976496	0.328819	1	ENSMUSG00000028132	99887	Tmem56	3	121201761	121283098	-1	protein_coding	transmembrane protein 56 [Source:MGI Symbol;Acc:MGI:1923195]	NA	NA	NA	ENSMUSG00000028132
ENSMUSG00000110308	0.568343	-1.30411	1.62505	-0.802503	0.422262	NA	ENSMUSG00000110308	NA	Gm45516	8	63020866	63025047	1	TEC	predicted gene 45516 [Source:MGI Symbol;Acc:MGI:5791352]	NA	NA	NA	ENSMUSG00000110308
ENSMUSG00000085072	1.58658	-1.30402	1.07197	-1.21647	0.223806	1	ENSMUSG00000085072	NA	Ict1os	11	115406586	115408314	-1	antisense_RNA	immature colon carcinoma transcript 1, opposite strand [Source:MGI Symbol;Acc:MGI:2441927]	NA	NA	NA	ENSMUSG00000085072
ENSMUSG00000083284	2.74601	-1.30368	0.854656	-1.52538	0.127164	1	ENSMUSG00000083284	NA	Gm13688	2	80602733	80603340	1	processed_pseudogene	predicted gene 13688 [Source:MGI Symbol;Acc:MGI:3652062]	NA	NA	NA	ENSMUSG00000083284
ENSMUSG00000028226	4.03332	-1.30348	0.906408	-1.43807	0.150413	1	ENSMUSG00000028226	17389	Mmp16	4	17852893	18119145	1	protein_coding	matrix metallopeptidase 16 [Source:MGI Symbol;Acc:MGI:1276107]	metalloprotease(PC00153)	NA	NA	ENSMUSG00000028226
ENSMUSG00000038242	0.72862	-1.3034	1.38039	-0.944232	0.345051	NA	ENSMUSG00000038242	71872	Aox4	1	58210397	58268597	1	protein_coding	aldehyde oxidase 4 [Source:MGI Symbol;Acc:MGI:1919122]	oxidase(PC00175)	NA	NA	ENSMUSG00000038242
ENSMUSG00000030606	1.99494	-1.3012	1.15241	-1.12912	0.258849	1	ENSMUSG00000030606	67666	Hapln3	7	79115102	79131018	-1	protein_coding	hyaluronan and proteoglycan link protein 3 [Source:MGI Symbol;Acc:MGI:1914916]	extracellular matrix glycoprotein(PC00100)	NA	NA	ENSMUSG00000030606
ENSMUSG00000105447	1.23381	-1.30111	1.2986	-1.00193	0.316377	1	ENSMUSG00000105447	NA	Gm43653	3	127836911	127838644	1	antisense_RNA	predicted gene 43653 [Source:MGI Symbol;Acc:MGI:5663790]	NA	NA	NA	ENSMUSG00000105447
ENSMUSG00000097917	2.69182	-1.29818	0.660675	-1.96493	0.049422	1	ENSMUSG00000097917	NA	Gm26839	12	99563796	99620038	1	bidirectional_promoter_lncRNA	predicted gene, 26839 [Source:MGI Symbol;Acc:MGI:5477333]	NA	NA	NA	ENSMUSG00000097917
ENSMUSG00000023781	0.888962	-1.29728	1.2777	-1.01532	0.309955	NA	ENSMUSG00000023781	84653	Hes7	11	69120404	69124055	1	protein_coding	hairy and enhancer of split 7 (Drosophila) [Source:MGI Symbol;Acc:MGI:2135679]	basic helix-loop-helix transcription factor(PC00055)	NA	NA	ENSMUSG00000023781
ENSMUSG00000083394	3.22531	-1.29707	1.40137	-0.925579	0.354665	1	ENSMUSG00000083394	NA	Gm11703	11	115724326	115724808	-1	processed_pseudogene	predicted gene 11703 [Source:MGI Symbol;Acc:MGI:3649808]	NA	NA	NA	ENSMUSG00000083394
ENSMUSG00000092556	3.62207	-1.29706	0.60299	-2.15104	0.031473	1	ENSMUSG00000092556	NA	Olfr755-ps1	17	37276648	37278105	1	unprocessed_pseudogene	olfactory receptor 755, pseudogene 1 [Source:MGI Symbol;Acc:MGI:3030589]	NA	NA	NA	ENSMUSG00000092556
ENSMUSG00000085976	0.429939	-1.29473	1.81265	-0.714273	0.475058	NA	ENSMUSG00000085976	NA	Gm13816	2	92742230	92759208	1	lincRNA	predicted gene 13816 [Source:MGI Symbol;Acc:MGI:3649317]	NA	NA	NA	ENSMUSG00000085976
ENSMUSG00000001496	0.760035	-1.29383	2.49806	-0.517933	0.604505	NA	ENSMUSG00000001496	21869	Nkx2-1	12	56531958	56536908	-1	protein_coding	NK2 homeobox 1 [Source:MGI Symbol;Acc:MGI:108067]	DNA binding protein(PC00009)	homeodomain transcription factor(PC00119)	NA	ENSMUSG00000001496
ENSMUSG00000041722	1.1391	-1.29199	1.3724	-0.941403	0.346498	1	ENSMUSG00000041722	433278	Khdc1c	1	21368331	21370845	1	protein_coding	KH domain containing 1C [Source:MGI Symbol;Acc:MGI:3583007]	NA	NA	NA	ENSMUSG00000041722
ENSMUSG00000107713	5.40765	-1.29186	0.757446	-1.70555	0.0880917	1	ENSMUSG00000107713	NA	Gm6681	6	99839708	99840314	-1	processed_pseudogene	predicted gene 6681 [Source:MGI Symbol;Acc:MGI:3643996]	NA	NA	NA	ENSMUSG00000107713
ENSMUSG00000080832	0.368308	-1.29111	2.53047	-0.510226	0.609893	NA	ENSMUSG00000080832	NA	M6pr-ps	3	99500550	99501379	1	processed_pseudogene	mannose-6-phosphate receptor, pseudogene [Source:MGI Symbol;Acc:MGI:96905]	NA	NA	NA	ENSMUSG00000080832
ENSMUSG00000110462	3.39176	-1.29065	0.826839	-1.56094	0.118537	1	ENSMUSG00000110462	NA	Gm35572	8	71752026	71781322	-1	lincRNA	predicted gene, 35572 [Source:MGI Symbol;Acc:MGI:5594731]	NA	NA	NA	ENSMUSG00000110462
ENSMUSG00000115190	0.362252	-1.28927	2.21667	-0.581625	0.560819	NA	ENSMUSG00000115190	NA	NA	NA	NA	NA	NA	NA	NA	NA	NA	NA	ENSMUSG00000115190
ENSMUSG00000093668	1.58262	-1.28899	1.15022	-1.12065	0.262436	1	ENSMUSG00000093668	75507	Pou5f2	13	78024902	78026295	1	protein_coding	POU domain class 5, transcription factor 2 [Source:MGI Symbol;Acc:MGI:1922757]	NA	NA	NA	ENSMUSG00000093668
ENSMUSG00000090691	2.23183	-1.28856	1.01825	-1.26546	0.205705	1	ENSMUSG00000090691	NA	Gm3667	14	6868502	6889962	-1	protein_coding	predicted gene 3667 [Source:MGI Symbol;Acc:MGI:3781843]	NA	NA	NA	ENSMUSG00000090691
ENSMUSG00000026415	11.1665	-1.28815	0.536332	-2.40177	0.0163159	1	ENSMUSG00000026415	64435	Fcamr	1	130800902	130814740	1	protein_coding	Fc receptor, IgA, IgM, high affinity [Source:MGI Symbol;Acc:MGI:1927803]	NA	NA	NA	ENSMUSG00000026415
ENSMUSG00000078776	0.46396	-1.28813	2.11482	-0.609096	0.542461	NA	ENSMUSG00000078776	319482	9530053A07Rik	7	28129466	28164811	1	protein_coding	RIKEN cDNA 9530053A07 gene [Source:MGI Symbol;Acc:MGI:2442118]	protease inhibitor(PC00191)	NA	NA	ENSMUSG00000078776
ENSMUSG00000060188	0.32488	-1.28807	2.95256	-0.436255	0.662651	NA	ENSMUSG00000060188	232983	Cxcl17	7	25400053	25412886	-1	protein_coding	chemokine (C-X-C motif) ligand 17 [Source:MGI Symbol;Acc:MGI:2387642]	NA	NA	NA	ENSMUSG00000060188
ENSMUSG00000029847	5.18266	-1.28708	0.629363	-2.04505	0.0408501	1	ENSMUSG00000029847	243753	Slc23a4	6	34945278	34988404	-1	protein_coding	solute carrier family 23 member 4 [Source:MGI Symbol;Acc:MGI:1917272]	transporter(PC00227)	NA	NA	ENSMUSG00000029847
ENSMUSG00000114295	1.70432	-1.28693	1.1313	-1.13756	0.255304	1	ENSMUSG00000114295	NA	AC168881.1	13	101348752	101349181	1	processed_pseudogene		NA	NA	NA	ENSMUSG00000114295
ENSMUSG00000105152	0.425386	-1.28688	1.84878	-0.69607	0.486385	NA	ENSMUSG00000105152	NA	Gm42864	5	112649367	112652112	1	lincRNA	predicted gene 42864 [Source:MGI Symbol;Acc:MGI:5663001]	NA	NA	NA	ENSMUSG00000105152
ENSMUSG00000094486	0.736004	-1.28657	1.48359	-0.8672	0.385832	NA	ENSMUSG00000094486	NA	Gm23268	5	135837295	135837372	-1	miRNA	predicted gene, 23268 [Source:MGI Symbol;Acc:MGI:5453045]	NA	NA	NA	ENSMUSG00000094486
ENSMUSG00000099773	0.886432	-1.28651	1.53757	-0.836715	0.402753	NA	ENSMUSG00000099773	NA	Hmgb1-rs16	9	104169199	104169811	-1	processed_pseudogene	high mobility group box 1, related sequence 16 [Source:MGI Symbol;Acc:MGI:104765]	NA	NA	NA	ENSMUSG00000099773
ENSMUSG00000082705	3.45588	-1.28644	0.985124	-1.30587	0.191597	1	ENSMUSG00000082705	NA	Gm15616	5	72047205	72047579	1	processed_pseudogene	predicted gene 15616 [Source:MGI Symbol;Acc:MGI:3783061]	NA	NA	NA	ENSMUSG00000082705
ENSMUSG00000102325	0.800153	-1.28567	1.61864	-0.794294	0.427024	NA	ENSMUSG00000102325	NA	Gm37789	1	103724345	103727233	1	TEC	predicted gene, 37789 [Source:MGI Symbol;Acc:MGI:5611017]	NA	NA	NA	ENSMUSG00000102325
ENSMUSG00000111544	0.633347	-1.28541	1.86964	-0.687519	0.491756	NA	ENSMUSG00000111544	NA	AC122188.2	10	91208258	91220642	-1	lincRNA		NA	NA	NA	ENSMUSG00000111544
ENSMUSG00000099459	1.62493	-1.28509	1.00331	-1.28085	0.200248	1	ENSMUSG00000099459	NA	Gm28556	1	138190194	138192127	-1	lincRNA	predicted gene 28556 [Source:MGI Symbol;Acc:MGI:5579262]	NA	NA	NA	ENSMUSG00000099459
ENSMUSG00000047501	1.57855	-1.28417	1.32734	-0.967481	0.333304	1	ENSMUSG00000047501	12740	Cldn4	5	134945119	134946934	-1	protein_coding	claudin 4 [Source:MGI Symbol;Acc:MGI:1313314]	tight junction(PC00214)	NA	NA	ENSMUSG00000047501
ENSMUSG00000072852	0.39497	-1.28415	2.56904	-0.499854	0.617178	NA	ENSMUSG00000072852	NA	2310040G07Rik	5	76928368	76947758	1	antisense_RNA	RIKEN cDNA 2310040G07 gene [Source:MGI Symbol;Acc:MGI:1917534]	NA	NA	NA	ENSMUSG00000072852
ENSMUSG00000038763	6.72235	-1.28303	0.811221	-1.5816	0.113741	1	ENSMUSG00000038763	116904	Alpk3	7	81057600	81105612	1	protein_coding	alpha-kinase 3 [Source:MGI Symbol;Acc:MGI:2151224]	NA	NA	NA	ENSMUSG00000038763
ENSMUSG00000109947	1.08198	-1.28283	1.0899	-1.17702	0.23919	1	ENSMUSG00000109947	NA	Gm45669	7	45091409	45098320	1	antisense_RNA	predicted gene 45669 [Source:MGI Symbol;Acc:MGI:5791505]	NA	NA	NA	ENSMUSG00000109947
ENSMUSG00000083041	11.8462	-1.28276	0.707416	-1.8133	0.0697859	1	ENSMUSG00000083041	NA	Gmfg-ps	6	4893352	4893778	-1	processed_pseudogene	glia maturation factor, gamma, pseudogene [Source:MGI Symbol;Acc:MGI:3704264]	NA	NA	NA	ENSMUSG00000083041
ENSMUSG00000092495	0.760665	-1.28242	1.63424	-0.78472	0.432618	NA	ENSMUSG00000092495	NA	Gm20405	15	65857869	65858356	1	processed_transcript	predicted gene 20405 [Source:MGI Symbol;Acc:MGI:5141870]	NA	NA	NA	ENSMUSG00000092495
ENSMUSG00000083236	0.831813	-1.28201	1.58801	-0.807303	0.419492	NA	ENSMUSG00000083236	NA	Gm7222	X	134828140	134829045	-1	processed_pseudogene	predicted gene 7222 [Source:MGI Symbol;Acc:MGI:3642944]	NA	NA	NA	ENSMUSG00000083236
ENSMUSG00000047730	9.05433	-1.28129	0.956386	-1.33972	0.180336	1	ENSMUSG00000047730	215384	Fcgbp	7	28071236	28120862	1	protein_coding	Fc fragment of IgG binding protein [Source:MGI Symbol;Acc:MGI:2444336]	protease inhibitor(PC00191)	NA	NA	ENSMUSG00000047730
ENSMUSG00000111027	40.1621	-1.28057	2.02369	-0.632789	0.526871	1	ENSMUSG00000111027	NA	CT033761.1	9	75061354	75062047	-1	processed_pseudogene		NA	NA	NA	ENSMUSG00000111027
ENSMUSG00000044362	0.831304	-1.27996	1.37643	-0.92991	0.352418	NA	ENSMUSG00000044362	70054	Ccdc89	7	90426577	90428669	1	protein_coding	coiled-coil domain containing 89 [Source:MGI Symbol;Acc:MGI:1917304]	NA	NA	NA	ENSMUSG00000044362
ENSMUSG00000107368	0.826413	-1.27991	1.37027	-0.934055	0.350275	NA	ENSMUSG00000107368	NA	1700018A23Rik	6	126822377	126825177	1	antisense_RNA	RIKEN cDNA 1700018A23 gene [Source:MGI Symbol;Acc:MGI:1919481]	NA	NA	NA	ENSMUSG00000107368
ENSMUSG00000114888	4.99864	-1.27823	0.643556	-1.9862	0.0470113	1	ENSMUSG00000114888	NA	AC140462.2	14	27238062	27240494	1	TEC		NA	NA	NA	ENSMUSG00000114888
ENSMUSG00000087050	1.14912	-1.27806	1.30678	-0.978021	0.328064	1	ENSMUSG00000087050	NA	Dhrs13os	11	78030012	78032665	-1	antisense_RNA	dehydrogenase/reductase (SDR family) member 13, opposite strand [Source:MGI Symbol;Acc:MGI:1924478]	NA	NA	NA	ENSMUSG00000087050
ENSMUSG00000114737	1.69229	-1.27786	1.2312	-1.0379	0.299316	1	ENSMUSG00000114737	NA	AC158392.3	14	14447661	14448944	-1	processed_pseudogene		NA	NA	NA	ENSMUSG00000114737
ENSMUSG00000102179	1.47148	-1.27733	1.1901	-1.0733	0.283138	1	ENSMUSG00000102179	NA	Gm37868	1	128143614	128146348	1	TEC	predicted gene, 37868 [Source:MGI Symbol;Acc:MGI:5611096]	NA	NA	NA	ENSMUSG00000102179
ENSMUSG00000076903	0.902448	-1.27672	1.07851	-1.18378	0.2365	NA	ENSMUSG00000076903	NA	Traj26	14	54194490	54194549	1	TR_J_gene	T cell receptor alpha joining 26 [Source:MGI Symbol;Acc:MGI:4439742]	NA	NA	NA	ENSMUSG00000076903
ENSMUSG00000056018	1.03426	-1.27646	1.10116	-1.15919	0.246377	1	ENSMUSG00000056018	75453	Ccdc7b	8	129067134	129183732	1	protein_coding	coiled-coil domain containing 7B [Source:MGI Symbol;Acc:MGI:1922703]	NA	NA	NA	ENSMUSG00000056018
ENSMUSG00000102459	0.511324	-1.27639	1.75656	-0.726639	0.467447	NA	ENSMUSG00000102459	NA	Gm38352	1	153889741	153892297	-1	TEC	predicted gene, 38352 [Source:MGI Symbol;Acc:MGI:5611580]	NA	NA	NA	ENSMUSG00000102459
ENSMUSG00000056821	0.543355	-1.2763	1.90263	-0.670807	0.502343	NA	ENSMUSG00000056821	NA	1700028I16Rik	10	82812123	82824242	1	lincRNA	RIKEN cDNA 1700028I16 gene [Source:MGI Symbol;Acc:MGI:1917253]	NA	NA	NA	ENSMUSG00000056821
ENSMUSG00000074164	0.502158	-1.27574	2.54283	-0.5017	0.615879	NA	ENSMUSG00000074164	NA	Vmn2r-ps54	7	41667979	41727193	1	transcribed_unprocessed_pseudogene	vomeronasal 2, receptor, pseudogene 54 [Source:MGI Symbol;Acc:MGI:1351350]	NA	NA	NA	ENSMUSG00000074164
ENSMUSG00000022445	0.779268	-1.27539	1.67376	-0.761991	0.446065	NA	ENSMUSG00000022445	76279	Cyp2d26	15	82790107	82794245	-1	protein_coding	cytochrome P450, family 2, subfamily d, polypeptide 26 [Source:MGI Symbol;Acc:MGI:1923529]	NA	NA	NA	ENSMUSG00000022445
ENSMUSG00000102553	2.01548	-1.27491	1.22489	-1.04084	0.297952	1	ENSMUSG00000102553	NA	D930036K23Rik	2	14016086	14020049	-1	TEC	RIKEN cDNA D930036K23 gene [Source:MGI Symbol;Acc:MGI:2442341]	NA	NA	NA	ENSMUSG00000102553
ENSMUSG00000068876	2.37906	-1.27426	1.01469	-1.2558	0.209187	1	ENSMUSG00000068876	70737	Cgn	3	94760069	94786492	-1	protein_coding	cingulin [Source:MGI Symbol;Acc:MGI:1927237]	NA	NA	NA	ENSMUSG00000068876
ENSMUSG00000062874	1.32846	-1.27372	1.30851	-0.973413	0.330348	1	ENSMUSG00000062874	NA	Gm4978	9	69450235	69451035	-1	processed_pseudogene	predicted gene 4978 [Source:MGI Symbol;Acc:MGI:3645765]	NA	NA	NA	ENSMUSG00000062874
ENSMUSG00000069581	4.08623	-1.27362	0.741916	-1.71666	0.0860415	1	ENSMUSG00000069581	252974	Tspear	10	77686569	77887021	1	protein_coding	thrombospondin type laminin G domain and EAR repeats [Source:MGI Symbol;Acc:MGI:2671932]	NA	NA	NA	ENSMUSG00000069581
ENSMUSG00000104102	0.719452	-1.2732	1.4335	-0.88818	0.374444	NA	ENSMUSG00000104102	NA	Gm32496	3	8628051	8632454	1	lincRNA	predicted gene, 32496 [Source:MGI Symbol;Acc:MGI:5591655]	NA	NA	NA	ENSMUSG00000104102
ENSMUSG00000081143	0.913519	-1.27259	1.5045	-0.84586	0.397631	1	ENSMUSG00000081143	NA	Gm15823	5	64252556	64253225	-1	processed_pseudogene	predicted gene 15823 [Source:MGI Symbol;Acc:MGI:3801858]	NA	NA	NA	ENSMUSG00000081143
ENSMUSG00000096996	0.490474	-1.27058	1.88187	-0.675168	0.499569	NA	ENSMUSG00000096996	NA	Gm26792	19	46335287	46338538	1	lincRNA	predicted gene, 26792 [Source:MGI Symbol;Acc:MGI:5477286]	NA	NA	NA	ENSMUSG00000096996
ENSMUSG00000022456	38.7245	-1.27032	0.502201	-2.52951	0.0114223	1	ENSMUSG00000022456	24050	2003-09-01	15	82274935	82294442	1	protein_coding	septin 3 [Source:MGI Symbol;Acc:MGI:1345148]	cytoskeletal protein(PC00085)	small GTPase(PC00208)	NA	ENSMUSG00000022456
ENSMUSG00000046550	12.0799	-1.26942	0.432912	-2.93229	0.00336477	0.826132	ENSMUSG00000046550	278240	Spin2c	X	153832225	153834243	1	protein_coding	spindlin family, member 2C [Source:MGI Symbol;Acc:MGI:3605548]	NA	NA	NA	ENSMUSG00000046550
ENSMUSG00000032598	398.546	-1.26884	0.416528	-3.04622	0.00231736	0.719674	ENSMUSG00000032598	80987	Nckipsd	9	108808368	108818844	1	protein_coding	NCK interacting protein with SH3 domain [Source:MGI Symbol;Acc:MGI:1931834]	NA	NA	NA	ENSMUSG00000032598
ENSMUSG00000022039	0.784735	-1.26843	1.40554	-0.90245	0.366818	NA	ENSMUSG00000022039	11495	Adam2	14	66027329	66077733	-1	protein_coding	a disintegrin and metallopeptidase domain 2 [Source:MGI Symbol;Acc:MGI:1340894]	metalloprotease(PC00153)	NA	NA	ENSMUSG00000022039
ENSMUSG00000000416	20.7917	-1.26815	0.770564	-1.64574	0.0998177	1	ENSMUSG00000000416	30785	Cttnbp2	6	18366478	18514843	-1	protein_coding	cortactin binding protein 2 [Source:MGI Symbol;Acc:MGI:1353467]	NA	NA	NA	ENSMUSG00000000416
ENSMUSG00000102563	0.755977	-1.26813	1.39781	-0.907228	0.364286	NA	ENSMUSG00000102563	NA	Gm37695	11	44610837	44617016	-1	TEC	predicted gene, 37695 [Source:MGI Symbol;Acc:MGI:5610923]	NA	NA	NA	ENSMUSG00000102563
ENSMUSG00000096269	1.76896	-1.26804	1.28586	-0.986145	0.324062	1	ENSMUSG00000096269	NA	Rpl31-ps21	5	21119149	21119522	-1	processed_pseudogene	ribosomal protein L31, pseudogene 21 [Source:MGI Symbol;Acc:MGI:3644652]	NA	NA	NA	ENSMUSG00000096269
ENSMUSG00000022763	0.354449	-1.26699	2.8835	-0.439392	0.660377	NA	ENSMUSG00000022763	72168	Aifm3	16	17489611	17507485	1	protein_coding	apoptosis-inducing factor, mitochondrion-associated 3 [Source:MGI Symbol;Acc:MGI:1919418]	dehydrogenase(PC00092)	oxidase(PC00175)	reductase(PC00198)	ENSMUSG00000022763
ENSMUSG00000110249	0.663322	-1.26662	1.46509	-0.864529	0.387297	NA	ENSMUSG00000110249	NA	9330121K16Rik	8	55073249	55077134	1	TEC	RIKEN cDNA 9330121K16 gene [Source:MGI Symbol;Acc:MGI:2443625]	NA	NA	NA	ENSMUSG00000110249
ENSMUSG00000110443	1.55911	-1.26641	1.2802	-0.989228	0.322552	1	ENSMUSG00000110443	NA	Gm39197	8	72283698	72284154	-1	processed_pseudogene	predicted gene, 39197 [Source:MGI Symbol;Acc:MGI:5622082]	NA	NA	NA	ENSMUSG00000110443
ENSMUSG00000116557	0.879461	-1.26613	1.00187	-1.26376	0.206315	NA	ENSMUSG00000116557	NA	NA	NA	NA	NA	NA	NA	NA	NA	NA	NA	ENSMUSG00000116557
ENSMUSG00000022780	1.23979	-1.26442	1.28438	-0.984461	0.324889	1	ENSMUSG00000022780	30060	Meltf	16	31878810	31899020	1	protein_coding	melanotransferrin [Source:MGI Symbol;Acc:MGI:1353421]	receptor(PC00197)	serine protease(PC00203)	transfer/carrier protein(PC00219)	ENSMUSG00000022780
ENSMUSG00000080465	1.36018	-1.26345	1.26008	-1.00267	0.316018	1	ENSMUSG00000080465	NA	Gm22486	6	71882557	71882693	-1	snoRNA	predicted gene, 22486 [Source:MGI Symbol;Acc:MGI:5452263]	NA	NA	NA	ENSMUSG00000080465
ENSMUSG00000072576	1.21247	-1.26336	1.30731	-0.966381	0.333854	1	ENSMUSG00000072576	NA	Gm16020	5	134463240	134463449	1	processed_pseudogene	predicted gene 16020 [Source:MGI Symbol;Acc:MGI:3801865]	NA	NA	NA	ENSMUSG00000072576
ENSMUSG00000082922	0.840077	-1.26074	1.6344	-0.771377	0.440484	NA	ENSMUSG00000082922	NA	Gm6939	7	126687459	126690034	-1	transcribed_unprocessed_pseudogene	predicted gene 6939 [Source:MGI Symbol;Acc:MGI:3782976]	NA	NA	NA	ENSMUSG00000082922
ENSMUSG00000045877	0.513983	-1.25914	1.53086	-0.822505	0.410789	NA	ENSMUSG00000045877	NA	4933415A04Rik	11	43587040	43589048	1	protein_coding	RIKEN cDNA 4933415A04 gene [Source:MGI Symbol;Acc:MGI:1922977]	NA	NA	NA	ENSMUSG00000045877
ENSMUSG00000113741	0.419651	-1.25898	2.00131	-0.629079	0.529297	NA	ENSMUSG00000113741	NA	AC159635.2	12	35534421	35590446	1	lincRNA		NA	NA	NA	ENSMUSG00000113741
ENSMUSG00000006575	25.2536	-1.25822	0.704799	-1.78522	0.0742256	1	ENSMUSG00000006575	51799	Rundc3a	11	102393403	102402555	1	protein_coding	RUN domain containing 3A [Source:MGI Symbol;Acc:MGI:1858752]	NA	NA	NA	ENSMUSG00000006575
ENSMUSG00000010601	0.499496	-1.25775	2.29636	-0.547713	0.583889	NA	ENSMUSG00000010601	75761	Apol7a	15	77388221	77399110	-1	protein_coding	apolipoprotein L 7a [Source:MGI Symbol;Acc:MGI:1923011]	apolipoprotein(PC00052)	transporter(PC00227)	NA	ENSMUSG00000010601
ENSMUSG00000076892	0.307554	-1.25612	2.14938	-0.584411	0.558944	NA	ENSMUSG00000076892	NA	Traj38	14	54180574	54180635	1	TR_J_gene	T cell receptor alpha joining 38 [Source:MGI Symbol;Acc:MGI:4439594]	NA	NA	NA	ENSMUSG00000076892
ENSMUSG00000108436	0.53838	-1.25599	1.47904	-0.84919	0.395776	NA	ENSMUSG00000108436	NA	Gm44851	7	80404269	80406577	1	antisense_RNA	predicted gene 44851 [Source:MGI Symbol;Acc:MGI:5753427]	NA	NA	NA	ENSMUSG00000108436
ENSMUSG00000025172	1.43884	-1.25458	0.967626	-1.29655	0.194785	1	ENSMUSG00000025172	56642	Ankrd2	19	42036038	42045110	1	protein_coding	ankyrin repeat domain 2 (stretch responsive muscle) [Source:MGI Symbol;Acc:MGI:1861447]	NA	NA	NA	ENSMUSG00000025172
ENSMUSG00000094893	0.76645	-1.25432	1.38662	-0.904586	0.365685	NA	ENSMUSG00000094893	215467	Gm4791	9	46998741	47003860	1	protein_coding	predicted gene 4791 [Source:MGI Symbol;Acc:MGI:3779436]	NA	NA	NA	ENSMUSG00000094893
ENSMUSG00000031998	1.40554	-1.25387	1.33472	-0.939423	0.347513	1	ENSMUSG00000031998	NA	1700128F08Rik	9	8221889	8241987	1	transcribed_processed_pseudogene	RIKEN cDNA 1700128F08 gene [Source:MGI Symbol;Acc:MGI:1923919]	NA	NA	NA	ENSMUSG00000031998
ENSMUSG00000104961	0.50694	-1.2538	2.35199	-0.53308	0.593978	NA	ENSMUSG00000104961	NA	Gm43835	5	64563771	64563919	1	TEC	predicted gene 43835 [Source:MGI Symbol;Acc:MGI:5663972]	NA	NA	NA	ENSMUSG00000104961
ENSMUSG00000114780	0.495239	-1.25312	2.056	-0.609492	0.542198	NA	ENSMUSG00000114780	NA	CT009733.2	13	107469822	107482718	1	lincRNA		NA	NA	NA	ENSMUSG00000114780
ENSMUSG00000111812	1.72859	-1.25296	1.35289	-0.926135	0.354376	1	ENSMUSG00000111812	NA	AC161371.1	9	21607863	21608327	-1	processed_pseudogene		NA	NA	NA	ENSMUSG00000111812
ENSMUSG00000104467	7.14585	-1.25135	0.558132	-2.24204	0.0249589	1	ENSMUSG00000104467	NA	Gm37660	9	71840005	71841736	-1	TEC	predicted gene, 37660 [Source:MGI Symbol;Acc:MGI:5610888]	NA	NA	NA	ENSMUSG00000104467
ENSMUSG00000058542	2.39889	-1.25111	1.34436	-0.930636	0.352042	1	ENSMUSG00000058542	NA	Gm15590	17	6131854	6132405	-1	processed_pseudogene	predicted gene 15590 [Source:MGI Symbol;Acc:MGI:3831433]	NA	NA	NA	ENSMUSG00000058542
ENSMUSG00000025650	43.6361	-1.24872	0.817006	-1.52841	0.12641	1	ENSMUSG00000025650	12836	Col7a1	9	108953586	108984875	1	protein_coding	collagen, type VII, alpha 1 [Source:MGI Symbol;Acc:MGI:88462]	receptor(PC00197)	NA	NA	ENSMUSG00000025650
ENSMUSG00000111726	0.823952	-1.24861	1.37029	-0.9112	0.36219	NA	ENSMUSG00000111726	NA	CT009721.2	9	41886512	41890604	-1	lincRNA		NA	NA	NA	ENSMUSG00000111726
ENSMUSG00000081343	0.80319	-1.24824	1.46088	-0.854448	0.392857	NA	ENSMUSG00000081343	NA	Gm16071	9	31094202	31094994	1	processed_pseudogene	predicted gene 16071 [Source:MGI Symbol;Acc:MGI:3801777]	NA	NA	NA	ENSMUSG00000081343
ENSMUSG00000081607	2.39904	-1.2482	1.62198	-0.769549	0.441567	1	ENSMUSG00000081607	NA	Gm15294	X	141873409	141875235	-1	protein_coding	predicted gene 15294 [Source:MGI Symbol;Acc:MGI:3708114]	dehydrogenase(PC00092)	NA	NA	ENSMUSG00000081607
ENSMUSG00000085851	0.910579	-1.24776	1.39957	-0.891529	0.372645	1	ENSMUSG00000085851	NA	4921518K17Rik	12	57585975	57618602	-1	antisense_RNA	RIKEN cDNA 4921518K17 gene [Source:MGI Symbol;Acc:MGI:1926008]	NA	NA	NA	ENSMUSG00000085851
ENSMUSG00000104187	0.931159	-1.24706	1.28538	-0.970185	0.331954	1	ENSMUSG00000104187	NA	Gm37820	14	61683510	61685656	1	TEC	predicted gene, 37820 [Source:MGI Symbol;Acc:MGI:5611048]	NA	NA	NA	ENSMUSG00000104187
ENSMUSG00000097560	0.294128	-1.24624	2.85833	-0.436003	0.662835	NA	ENSMUSG00000097560	NA	Gm26904	17	46471501	46825221	1	lincRNA	predicted gene, 26904 [Source:MGI Symbol;Acc:MGI:5477398]	NA	NA	NA	ENSMUSG00000097560
ENSMUSG00000095762	24.2687	-1.24516	1.7155	-0.72583	0.467943	1	ENSMUSG00000095762	NA	Gm16378	8	122841731	122842072	1	processed_pseudogene	predicted gene 16378 [Source:MGI Symbol;Acc:MGI:3646886]	NA	NA	NA	ENSMUSG00000095762
ENSMUSG00000042641	2.34897	-1.24408	0.911593	-1.36473	0.172336	1	ENSMUSG00000042641	240816	Rgsl1	1	153779381	153844142	-1	protein_coding	regulator of G-protein signaling like 1 [Source:MGI Symbol;Acc:MGI:2685048]	NA	NA	NA	ENSMUSG00000042641
ENSMUSG00000087235	2.71816	-1.24361	0.955175	-1.30197	0.192928	1	ENSMUSG00000087235	NA	Gm4750	X	152432477	152434676	1	transcribed_processed_pseudogene	predicted gene 4750 [Source:MGI Symbol;Acc:MGI:3647391]	NA	NA	NA	ENSMUSG00000087235
ENSMUSG00000056777	0.796661	-1.24248	2.02621	-0.613202	0.539743	NA	ENSMUSG00000056777	NA	Rpl21-ps13	7	139719399	139719881	1	processed_pseudogene	ribosomal protein L21-ps13 [Source:MGI Symbol;Acc:MGI:3649022]	NA	NA	NA	ENSMUSG00000056777
ENSMUSG00000020690	0.336947	-1.2419	3.93003	-0.316004	0.751999	NA	ENSMUSG00000020690	70894	Efcab3	11	105063592	105117537	1	protein_coding	EF-hand calcium binding domain 3 [Source:MGI Symbol;Acc:MGI:1918144]	NA	NA	NA	ENSMUSG00000020690
ENSMUSG00000077575	6.66482	-1.24018	0.671453	-1.84702	0.0647449	1	ENSMUSG00000077575	NA	Gm24888	7	109521280	109521409	1	snoRNA	predicted gene, 24888 [Source:MGI Symbol;Acc:MGI:5454665]	NA	NA	NA	ENSMUSG00000077575
ENSMUSG00000040938	0.633707	-1.23852	1.82998	-0.676796	0.498535	NA	ENSMUSG00000040938	216867	Slc16a11	11	70212752	70216417	1	protein_coding	solute carrier family 16 (monocarboxylic acid transporters), member 11 [Source:MGI Symbol;Acc:MGI:2663709]	transporter(PC00227)	NA	NA	ENSMUSG00000040938
ENSMUSG00000107225	0.797022	-1.23851	1.24872	-0.991821	0.321285	NA	ENSMUSG00000107225	NA	Gm43637	5	117130323	117133248	1	TEC	predicted gene 43637 [Source:MGI Symbol;Acc:MGI:5663774]	NA	NA	NA	ENSMUSG00000107225
ENSMUSG00000081042	1.00129	-1.23633	2.04221	-0.605387	0.544922	1	ENSMUSG00000081042	NA	Psmb7-ps2	X	8105294	8106113	1	transcribed_processed_pseudogene	proteasome (prosome, macropain) subunit, beta type 7, pseudogene 2 [Source:MGI Symbol;Acc:MGI:1859624]	NA	NA	NA	ENSMUSG00000081042
ENSMUSG00000028865	3.38008	-1.23613	1.43788	-0.859693	0.389958	1	ENSMUSG00000028865	69655	Cd164l2	4	133212131	133224555	1	protein_coding	CD164 sialomucin-like 2 [Source:MGI Symbol;Acc:MGI:1916905]	NA	NA	NA	ENSMUSG00000028865
ENSMUSG00000022211	30.5609	-1.2354	0.511395	-2.41575	0.0157027	1	ENSMUSG00000022211	268747	Carmil3	14	55491093	55508246	1	protein_coding	capping protein regulator and myosin 1 linker 3 [Source:MGI Symbol;Acc:MGI:2448573]	nucleic acid binding(PC00171)	transcription cofactor(PC00217)	NA	ENSMUSG00000022211
ENSMUSG00000075267	0.73648	-1.23317	1.87987	-0.655987	0.511833	NA	ENSMUSG00000075267	381375	Dfnb59	2	76648476	76658556	1	protein_coding	deafness, autosomal recessive 59 (human) [Source:MGI Symbol;Acc:MGI:2685847]	NA	NA	NA	ENSMUSG00000075267
ENSMUSG00000074521	4.54666	-1.23177	1.1015	-1.11826	0.263455	1	ENSMUSG00000074521	NA	Gm14327	2	177897096	177905784	1	protein_coding	predicted gene 14327 [Source:MGI Symbol;Acc:MGI:3652188]	NA	NA	NA	ENSMUSG00000074521
ENSMUSG00000097632	0.758996	-1.23175	1.2183	-1.01104	0.311996	NA	ENSMUSG00000097632	NA	4930552P12Rik	19	55640589	55702204	-1	lincRNA	RIKEN cDNA 4930552P12 gene [Source:MGI Symbol;Acc:MGI:1924844]	NA	NA	NA	ENSMUSG00000097632
ENSMUSG00000112347	1.50802	-1.23155	1.17979	-1.04387	0.296544	1	ENSMUSG00000112347	NA	AC121961.1	10	62602350	62604128	1	bidirectional_promoter_lncRNA		NA	NA	NA	ENSMUSG00000112347
ENSMUSG00000064778	1.33683	-1.23066	1.19801	-1.02725	0.304302	1	ENSMUSG00000064778	NA	Snord59a	10	128084143	128084216	1	snoRNA	small nucleolar RNA, C/D box 59A [Source:MGI Symbol;Acc:MGI:5454983]	NA	NA	NA	ENSMUSG00000064778
ENSMUSG00000091635	1.18404	-1.22997	0.929297	-1.32355	0.185654	1	ENSMUSG00000091635	231589	Vmn2r13	5	109156068	109192107	-1	protein_coding	vomeronasal 2, receptor 13 [Source:MGI Symbol;Acc:MGI:3761379]	G-protein coupled receptor(PC00021)	ionotropic glutamate receptor(PC00134)	NA	ENSMUSG00000091635
ENSMUSG00000032010	42.5012	-1.2285	0.550921	-2.2299	0.0257541	1	ENSMUSG00000032010	53376	Usp2	9	44067021	44095627	1	protein_coding	ubiquitin specific peptidase 2 [Source:MGI Symbol;Acc:MGI:1858178]	cysteine protease(PC00081)	NA	NA	ENSMUSG00000032010
ENSMUSG00000069554	0.798116	-1.22807	1.34222	-0.914953	0.360216	NA	ENSMUSG00000069554	NA	I830134H01Rik	19	38051774	38054528	-1	lincRNA	RIKEN cDNA I830134H01 gene [Source:MGI Symbol;Acc:MGI:3588250]	NA	NA	NA	ENSMUSG00000069554
ENSMUSG00000103137	1.70955	-1.22783	1.01425	-1.21057	0.226061	1	ENSMUSG00000103137	NA	Gm37981	1	171679336	171679870	-1	processed_pseudogene	predicted gene, 37981 [Source:MGI Symbol;Acc:MGI:5611209]	NA	NA	NA	ENSMUSG00000103137
ENSMUSG00000108662	0.467936	-1.22771	1.71176	-0.717218	0.473239	NA	ENSMUSG00000108662	NA	Olfr188-ps1	16	59046861	59054202	-1	transcribed_unprocessed_pseudogene	olfactory receptor 188, pseudogene 1 [Source:MGI Symbol;Acc:MGI:3030022]	NA	NA	NA	ENSMUSG00000108662
ENSMUSG00000117427	0.170973	-1.22755	5.49167	-0.223529	0.823123	NA	ENSMUSG00000117427	NA	NA	NA	NA	NA	NA	NA	NA	NA	NA	NA	ENSMUSG00000117427
ENSMUSG00000109850	2.31976	-1.22657	5.00272	-0.245182	0.806316	1	ENSMUSG00000109850	NA	Gm45692	8	26119534	26160819	1	protein_coding	predicted gene 45692 [Source:MGI Symbol;Acc:MGI:5804807]	NA	NA	NA	ENSMUSG00000109850
ENSMUSG00000056752	4.19809	-1.22515	1.32554	-0.924263	0.35535	1	ENSMUSG00000056752	237806	Dnah9	11	65831282	66168551	-1	protein_coding	dynein, axonemal, heavy chain 9 [Source:MGI Symbol;Acc:MGI:1289279]	hydrolase(PC00121)	microtubule binding motor protein(PC00156)	NA	ENSMUSG00000056752
ENSMUSG00000112341	4.76189	-1.22398	0.826611	-1.48072	0.138681	1	ENSMUSG00000112341	NA	AC115290.2	10	65534654	65535277	1	processed_pseudogene		NA	NA	NA	ENSMUSG00000112341
ENSMUSG00000037716	4.44292	-1.2239	2.09357	-0.5846	0.558817	1	ENSMUSG00000037716	382077	Ccdc33	9	58028677	58118823	-1	protein_coding	coiled-coil domain containing 33 [Source:MGI Symbol;Acc:MGI:1922464]	NA	NA	NA	ENSMUSG00000037716
ENSMUSG00000079344	0.169454	-1.22252	5.49183	-0.222606	0.823842	NA	ENSMUSG00000079344	628236	Lipo4	19	33498037	33517780	-1	protein_coding	lipase, member O4 [Source:MGI Symbol;Acc:MGI:3779637]	lipase(PC00143)	serine protease(PC00203)	NA	ENSMUSG00000079344
ENSMUSG00000114649	0.924934	-1.22193	1.41787	-0.861803	0.388796	1	ENSMUSG00000114649	NA	CT025642.3	13	78171630	78182973	1	lincRNA		NA	NA	NA	ENSMUSG00000114649
ENSMUSG00000097837	0.173544	-1.22185	5.29719	-0.230661	0.817578	NA	ENSMUSG00000097837	NA	Gm26794	2	55433514	55437860	-1	lincRNA	predicted gene, 26794 [Source:MGI Symbol;Acc:MGI:5477288]	NA	NA	NA	ENSMUSG00000097837
ENSMUSG00000072944	2.65033	-1.22109	1.41156	-0.865064	0.387004	1	ENSMUSG00000072944	279706	Nup62cl	X	140006805	140062712	-1	protein_coding	nucleoporin 62 C-terminal like [Source:MGI Symbol;Acc:MGI:2685565]	transporter(PC00227)	NA	NA	ENSMUSG00000072944
ENSMUSG00000028354	3.06401	-1.22019	1.55057	-0.786932	0.431322	1	ENSMUSG00000028354	54418	Fmn2	1	174501825	174822729	1	protein_coding	formin 2 [Source:MGI Symbol;Acc:MGI:1859252]	NA	NA	NA	ENSMUSG00000028354
ENSMUSG00000102275	5.3413	-1.22009	0.595923	-2.04739	0.0406201	1	ENSMUSG00000102275	NA	Gm37144	1	4778063	4779212	-1	TEC	predicted gene, 37144 [Source:MGI Symbol;Acc:MGI:5610372]	NA	NA	NA	ENSMUSG00000102275
ENSMUSG00000113690	2.83476	-1.21886	1.07378	-1.13512	0.256326	1	ENSMUSG00000113690	NA	CT030722.2	13	62151170	62151914	1	processed_pseudogene		NA	NA	NA	ENSMUSG00000113690
ENSMUSG00000041700	1.264	-1.2185	1.77729	-0.685597	0.492967	1	ENSMUSG00000041700	237091	Lhfpl1	X	145290359	145349089	-1	protein_coding	lipoma HMGIC fusion partner-like 1 [Source:MGI Symbol;Acc:MGI:1891214]	NA	NA	NA	ENSMUSG00000041700
ENSMUSG00000117250	3.59402	-1.21787	0.601128	-2.02597	0.0427676	1	ENSMUSG00000117250	NA	NA	NA	NA	NA	NA	NA	NA	NA	NA	NA	ENSMUSG00000117250
ENSMUSG00000084939	1.00295	-1.21784	1.18061	-1.03154	0.302289	1	ENSMUSG00000084939	NA	Gm830	4	95464724	95487394	-1	processed_transcript	predicted gene 830 [Source:MGI Symbol;Acc:MGI:2685676]	NA	NA	NA	ENSMUSG00000084939
ENSMUSG00000000948	8.68734	-1.21767	0.664267	-1.8331	0.0667883	1	ENSMUSG00000000948	NA	Gm38393	7	59974149	60005064	-1	protein_coding	predicted gene, 38393 [Source:MGI Symbol;Acc:MGI:5613898]	NA	NA	NA	ENSMUSG00000000948
ENSMUSG00000079429	13.4227	-1.21681	0.795885	-1.52887	0.126296	1	ENSMUSG00000079429	100040766	Mroh2a	1	88226986	88262289	1	protein_coding	maestro heat-like repeat family member 2A [Source:MGI Symbol;Acc:MGI:3705228]	NA	NA	NA	ENSMUSG00000079429
ENSMUSG00000103059	0.502356	-1.21626	2.14406	-0.567273	0.570529	NA	ENSMUSG00000103059	NA	Gm18186	1	165493422	165495001	1	processed_pseudogene	predicted gene, 18186 [Source:MGI Symbol;Acc:MGI:5010371]	NA	NA	NA	ENSMUSG00000103059
ENSMUSG00000095429	14.7847	-1.21541	1.49144	-0.814925	0.415115	1	ENSMUSG00000095429	NA	Ighv5-12	12	113702124	113702578	-1	IG_V_gene	immunoglobulin heavy variable 5-12 [Source:MGI Symbol;Acc:MGI:4439516]	NA	NA	NA	ENSMUSG00000095429
ENSMUSG00000075044	0.133616	-1.21535	5.49206	-0.221292	0.824865	NA	ENSMUSG00000075044	236293	Slc22a29	19	8160165	8218900	-1	protein_coding	solute carrier family 22. member 29 [Source:MGI Symbol;Acc:MGI:3605624]	NA	NA	NA	ENSMUSG00000075044
ENSMUSG00000117315	0.198974	-1.21535	4.24234	-0.28648	0.774511	NA	ENSMUSG00000117315	NA	NA	NA	NA	NA	NA	NA	NA	NA	NA	NA	ENSMUSG00000117315
ENSMUSG00000059821	0.224748	-1.21412	3.51539	-0.345372	0.729815	NA	ENSMUSG00000059821	258518	Olfr847	9	19373668	19378669	-1	protein_coding	olfactory receptor 847 [Source:MGI Symbol;Acc:MGI:3030681]	NA	NA	NA	ENSMUSG00000059821
ENSMUSG00000046130	0.257314	-1.21207	2.97871	-0.40691	0.684074	NA	ENSMUSG00000046130	100312477	Vmn1r184	7	26266831	26267775	1	protein_coding	vomeronasal 1 receptor, 184 [Source:MGI Symbol;Acc:MGI:3852451]	NA	NA	NA	ENSMUSG00000046130
ENSMUSG00000064361	0.338318	-1.2119	2.93623	-0.412739	0.679798	NA	ENSMUSG00000064361	NA	mt-Tr	MT	9808	9875	1	Mt_tRNA	mitochondrially encoded tRNA arginine [Source:MGI Symbol;Acc:MGI:102476]	NA	NA	NA	ENSMUSG00000064361
ENSMUSG00000030364	0.439955	-1.21174	2.7004	-0.448728	0.653628	NA	ENSMUSG00000030364	94071	Clec2h	6	128662385	128677374	1	protein_coding	C-type lectin domain family 2, member h [Source:MGI Symbol;Acc:MGI:2136934]	NA	NA	NA	ENSMUSG00000030364
ENSMUSG00000030222	6.83318	-1.21137	0.675084	-1.79439	0.0727505	1	ENSMUSG00000030222	232441	Rerg	6	137054825	137170497	-1	protein_coding	RAS-like, estrogen-regulated, growth-inhibitor [Source:MGI Symbol;Acc:MGI:2665139]	small GTPase(PC00208)	NA	NA	ENSMUSG00000030222
ENSMUSG00000056004	7.90702	-1.21091	0.958925	-1.26278	0.206668	1	ENSMUSG00000056004	231014	9330182L06Rik	5	9266118	9481825	1	protein_coding	RIKEN cDNA 9330182L06 gene [Source:MGI Symbol;Acc:MGI:2443264]	NA	NA	NA	ENSMUSG00000056004
ENSMUSG00000045055	15.9754	-1.21079	0.699232	-1.7316	0.0833452	1	ENSMUSG00000045055	NA	Rpsa-ps2	10	128776371	128777250	-1	processed_pseudogene	ribosomal protein SA, pseudogene 2 [Source:MGI Symbol;Acc:MGI:3643356]	NA	NA	NA	ENSMUSG00000045055
ENSMUSG00000097390	0.452152	-1.21073	2.13797	-0.566299	0.571191	NA	ENSMUSG00000097390	NA	Gm26785	17	46273479	46280060	1	lincRNA	predicted gene, 26785 [Source:MGI Symbol;Acc:MGI:5477279]	NA	NA	NA	ENSMUSG00000097390
ENSMUSG00000103588	0.193116	-1.21067	5.23831	-0.231118	0.817223	NA	ENSMUSG00000103588	NA	Gm18445	1	173986926	174001972	-1	unprocessed_pseudogene	predicted gene, 18445 [Source:MGI Symbol;Acc:MGI:5010630]	NA	NA	NA	ENSMUSG00000103588
ENSMUSG00000086060	0.168775	-1.2103	5.32557	-0.227261	0.82022	NA	ENSMUSG00000086060	NA	Gm16084	12	107147164	107160207	-1	lincRNA	predicted gene 16084 [Source:MGI Symbol;Acc:MGI:3801938]	NA	NA	NA	ENSMUSG00000086060
ENSMUSG00000034990	1.63231	-1.21021	1.30321	-0.928639	0.353076	1	ENSMUSG00000034990	246190	Otoa	7	121081650	121163097	1	protein_coding	otoancorin [Source:MGI Symbol;Acc:MGI:2149209]	extracellular matrix glycoprotein(PC00100)	NA	NA	ENSMUSG00000034990
ENSMUSG00000040936	22.7379	-1.21015	0.490605	-2.46666	0.0136382	1	ENSMUSG00000040936	209012	Ulk4	9	120955351	121277197	-1	protein_coding	unc-51-like kinase 4 [Source:MGI Symbol;Acc:MGI:1921622]	NA	NA	NA	ENSMUSG00000040936
ENSMUSG00000028487	34.3587	-1.20996	0.665063	-1.81931	0.0688636	1	ENSMUSG00000028487	242509	Bnc2	4	84275095	84675275	-1	protein_coding	basonuclin 2 [Source:MGI Symbol;Acc:MGI:2443805]	DNA binding protein(PC00009)	zinc finger transcription factor(PC00244)	NA	ENSMUSG00000028487
ENSMUSG00000108111	0.20037	-1.20912	4.23616	-0.285428	0.775316	NA	ENSMUSG00000108111	NA	Gm45901	6	90486393	90519480	1	lincRNA	predicted gene 45901 [Source:MGI Symbol;Acc:MGI:5805016]	NA	NA	NA	ENSMUSG00000108111
ENSMUSG00000082233	1.213	-1.20827	1.15381	-1.0472	0.295008	1	ENSMUSG00000082233	NA	Gm6506	15	77443285	77444420	-1	processed_pseudogene	predicted gene 6506 [Source:MGI Symbol;Acc:MGI:3645107]	NA	NA	NA	ENSMUSG00000082233
ENSMUSG00000082516	0.252501	-1.20805	3.48966	-0.34618	0.729207	NA	ENSMUSG00000082516	NA	Gm13342	2	22410525	22410731	-1	processed_pseudogene	predicted gene 13342 [Source:MGI Symbol;Acc:MGI:3650441]	NA	NA	NA	ENSMUSG00000082516
ENSMUSG00000047751	4.2241	-1.20786	0.668494	-1.80684	0.0707875	1	ENSMUSG00000047751	22286	Utf1	7	139943789	139945112	1	protein_coding	undifferentiated embryonic cell transcription factor 1 [Source:MGI Symbol;Acc:MGI:1276125]	NA	NA	NA	ENSMUSG00000047751
ENSMUSG00000073198	0.551863	-1.20729	3.47657	-0.347265	0.728393	NA	ENSMUSG00000073198	NA	Bnip3l-ps	12	18216542	18217673	1	transcribed_processed_pseudogene	BCL2/adenovirus E1B interacting protein 3-like, pseudogene [Source:MGI Symbol;Acc:MGI:3642435]	NA	NA	NA	ENSMUSG00000073198
ENSMUSG00000106961	0.441694	-1.20614	2.12788	-0.566826	0.570832	NA	ENSMUSG00000106961	NA	Gm43128	2	35280390	35282010	1	TEC	predicted gene 43128 [Source:MGI Symbol;Acc:MGI:5663265]	NA	NA	NA	ENSMUSG00000106961
ENSMUSG00000092457	0.294902	-1.20562	2.58867	-0.465727	0.641411	NA	ENSMUSG00000092457	NA	Gm8835	17	36201996	36206339	-1	unprocessed_pseudogene	predicted gene 8835 [Source:MGI Symbol;Acc:MGI:3646857]	NA	NA	NA	ENSMUSG00000092457
ENSMUSG00000033713	1235.45	-1.20541	0.405418	-2.97327	0.00294649	0.814196	ENSMUSG00000033713	71375	Foxn3	12	99190078	99563582	-1	protein_coding	forkhead box N3 [Source:MGI Symbol;Acc:MGI:1918625]	NA	NA	NA	ENSMUSG00000033713
ENSMUSG00000049410	4.23311	-1.20405	0.565412	-2.1295	0.0332126	1	ENSMUSG00000049410	NA	Zfp683	4	134053838	134058996	1	protein_coding	zinc finger protein 683 [Source:MGI Symbol;Acc:MGI:3650254]	NA	NA	NA	ENSMUSG00000049410
ENSMUSG00000002076	2.55499	-1.20392	1.33792	-0.89985	0.3682	1	ENSMUSG00000002076	74377	Hsf2bp	17	31944769	32034508	-1	protein_coding	heat shock transcription factor 2 binding protein [Source:MGI Symbol;Acc:MGI:1921627]	NA	NA	NA	ENSMUSG00000002076
ENSMUSG00000029377	0.164897	-1.20377	4.34937	-0.276768	0.781958	NA	ENSMUSG00000029377	13874	Ereg	5	91074622	91093646	1	protein_coding	epiregulin [Source:MGI Symbol;Acc:MGI:107508]	growth factor(PC00112)	NA	NA	ENSMUSG00000029377
ENSMUSG00000048188	7.56438	-1.20374	3.80834	-0.316079	0.751942	1	ENSMUSG00000048188	NA	Gm8181	18	43171159	43171827	1	processed_pseudogene	predicted gene 8181 [Source:MGI Symbol;Acc:MGI:3643329]	NA	NA	NA	ENSMUSG00000048188
ENSMUSG00000039830	0.734392	-1.20368	1.55541	-0.773871	0.439007	NA	ENSMUSG00000039830	50913	Olig2	16	91225550	91228677	1	protein_coding	oligodendrocyte transcription factor 2 [Source:MGI Symbol;Acc:MGI:1355331]	basic helix-loop-helix transcription factor(PC00055)	nuclease(PC00170)	NA	ENSMUSG00000039830
ENSMUSG00000102657	0.161203	-1.20364	5.37543	-0.223915	0.822823	NA	ENSMUSG00000102657	NA	Gm37899	12	109668869	109677585	1	TEC	predicted gene, 37899 [Source:MGI Symbol;Acc:MGI:5611127]	NA	NA	NA	ENSMUSG00000102657
ENSMUSG00000106062	0.563481	-1.20355	1.74247	-0.690715	0.489744	NA	ENSMUSG00000106062	NA	Gm43820	3	37644607	37647952	1	TEC	predicted gene 43820 [Source:MGI Symbol;Acc:MGI:5663957]	NA	NA	NA	ENSMUSG00000106062
ENSMUSG00000091412	0.169061	-1.20319	5.32274	-0.226047	0.821165	NA	ENSMUSG00000091412	NA	Gm2895	15	66969323	67013039	1	processed_transcript	predicted gene 2895 [Source:MGI Symbol;Acc:MGI:3781073]	NA	NA	NA	ENSMUSG00000091412
ENSMUSG00000091007	1.00356	-1.20312	1.10778	-1.08607	0.277448	1	ENSMUSG00000091007	NA	D630036H23Rik	12	36381242	36382181	-1	protein_coding	RIKEN cDNA D630036H23 gene [Source:MGI Symbol;Acc:MGI:3704386]	NA	NA	NA	ENSMUSG00000091007
ENSMUSG00000050830	1.97364	-1.20215	1.12066	-1.07271	0.2834	1	ENSMUSG00000050830	319922	Vwc2	11	11114223	11268931	1	protein_coding	von Willebrand factor C domain containing 2 [Source:MGI Symbol;Acc:MGI:2442987]	NA	NA	NA	ENSMUSG00000050830
ENSMUSG00000096580	1.67319	-1.20202	1.04258	-1.15293	0.248937	1	ENSMUSG00000096580	NA	Igkv1-132	6	67759700	67760413	1	IG_V_gene	immunoglobulin kappa variable 1-132 [Source:MGI Symbol;Acc:MGI:3648800]	immunoglobulin(PC00123)	NA	NA	ENSMUSG00000096580
ENSMUSG00000054013	2.84788	-1.20185	0.768483	-1.56392	0.117835	1	ENSMUSG00000054013	104885	Tmem179	12	112500189	112516747	-1	protein_coding	transmembrane protein 179 [Source:MGI Symbol;Acc:MGI:2144891]	NA	NA	NA	ENSMUSG00000054013
ENSMUSG00000092483	1.60673	-1.20145	0.878713	-1.36728	0.171538	1	ENSMUSG00000092483	NA	Gm20421	4	154960770	154961678	-1	processed_transcript	predicted gene 20421 [Source:MGI Symbol;Acc:MGI:5141886]	NA	NA	NA	ENSMUSG00000092483
ENSMUSG00000080989	0.567933	-1.19862	1.6458	-0.728291	0.466436	NA	ENSMUSG00000080989	NA	Gm14048	2	130880866	130882133	1	processed_pseudogene	predicted gene 14048 [Source:MGI Symbol;Acc:MGI:3650660]	NA	NA	NA	ENSMUSG00000080989
ENSMUSG00000086876	0.169538	-1.19847	5.49261	-0.218196	0.827276	NA	ENSMUSG00000086876	NA	Gm12828	4	117445950	117455040	1	antisense_RNA	predicted gene 12828 [Source:MGI Symbol;Acc:MGI:3650145]	NA	NA	NA	ENSMUSG00000086876
ENSMUSG00000110151	0.189651	-1.19823	4.27769	-0.280112	0.779392	NA	ENSMUSG00000110151	NA	Gm38416	8	117681622	117693198	1	lincRNA	predicted gene, 38416 [Source:MGI Symbol;Acc:MGI:5621301]	NA	NA	NA	ENSMUSG00000110151
ENSMUSG00000104470	0.601602	-1.19796	1.79568	-0.667137	0.504685	NA	ENSMUSG00000104470	NA	Gm38207	3	93638044	93641548	1	TEC	predicted gene, 38207 [Source:MGI Symbol;Acc:MGI:5611435]	NA	NA	NA	ENSMUSG00000104470
ENSMUSG00000102895	0.524598	-1.19785	1.4252	-0.840479	0.40064	NA	ENSMUSG00000102895	NA	5830415G21Rik	3	50575186	50576517	-1	TEC	RIKEN cDNA 5830415G21 gene [Source:MGI Symbol;Acc:MGI:1923259]	NA	NA	NA	ENSMUSG00000102895
ENSMUSG00000100108	0.160054	-1.19734	4.37223	-0.273852	0.784198	NA	ENSMUSG00000100108	NA	Gm28100	1	85972365	85986917	-1	lincRNA	predicted gene 28100 [Source:MGI Symbol;Acc:MGI:5578806]	NA	NA	NA	ENSMUSG00000100108
ENSMUSG00000048027	138.971	-1.19721	0.67028	-1.78614	0.0740767	1	ENSMUSG00000048027	68799	Rgmb	17	15806253	15826586	-1	protein_coding	repulsive guidance molecule family member B [Source:MGI Symbol;Acc:MGI:1916049]	NA	NA	NA	ENSMUSG00000048027
ENSMUSG00000106883	0.635476	-1.19718	1.71949	-0.696243	0.486277	NA	ENSMUSG00000106883	NA	Gm34091	6	127411130	127411733	1	processed_pseudogene	predicted gene, 34091 [Source:MGI Symbol;Acc:MGI:5593250]	NA	NA	NA	ENSMUSG00000106883
ENSMUSG00000053588	1.39348	-1.19672	0.867823	-1.37899	0.167899	1	ENSMUSG00000053588	NA	A730061H03Rik	14	55559942	55560406	-1	protein_coding	RIKEN cDNA A730061H03 gene [Source:MGI Symbol;Acc:MGI:2445099]	NA	NA	NA	ENSMUSG00000053588
ENSMUSG00000048967	6.25048	-1.19616	0.818488	-1.46142	0.143899	1	ENSMUSG00000048967	67184	Yjefn3	8	69887788	69902712	-1	protein_coding	YjeF N-terminal domain containing 3 [Source:MGI Symbol;Acc:MGI:2681845]	NA	NA	NA	ENSMUSG00000048967
ENSMUSG00000114501	0.379586	-1.19608	1.91313	-0.625197	0.531842	NA	ENSMUSG00000114501	NA	AC154176.2	13	60622967	60629395	1	TEC		NA	NA	NA	ENSMUSG00000114501
ENSMUSG00000087486	0.260891	-1.1958	2.96979	-0.402656	0.687202	NA	ENSMUSG00000087486	NA	Gm11723	11	117783326	117785055	-1	antisense_RNA	predicted gene 11723 [Source:MGI Symbol;Acc:MGI:3650120]	NA	NA	NA	ENSMUSG00000087486
ENSMUSG00000098731	0.847976	-1.19523	1.18997	-1.00443	0.315174	NA	ENSMUSG00000098731	NA	Mir7027	5	114404468	114404539	1	miRNA	microRNA 7027 [Source:MGI Symbol;Acc:MGI:5531213]	NA	NA	NA	ENSMUSG00000098731
ENSMUSG00000083832	0.388599	-1.19505	2.35575	-0.507292	0.61195	NA	ENSMUSG00000083832	NA	Gm13771	2	91641685	91641922	-1	processed_pseudogene	predicted gene 13771 [Source:MGI Symbol;Acc:MGI:3650181]	NA	NA	NA	ENSMUSG00000083832
ENSMUSG00000083009	0.629435	-1.1949	2.25108	-0.530812	0.595549	NA	ENSMUSG00000083009	NA	Gm1335	2	93940299	93940878	-1	processed_pseudogene	predicted gene 1335 [Source:MGI Symbol;Acc:MGI:2686181]	NA	NA	NA	ENSMUSG00000083009
ENSMUSG00000113812	0.415184	-1.19429	1.78872	-0.667677	0.50434	NA	ENSMUSG00000113812	NA	AC122357.3	13	62432866	62434390	-1	TEC		NA	NA	NA	ENSMUSG00000113812
ENSMUSG00000024912	1.30904	-1.19427	1.41689	-0.842881	0.399295	1	ENSMUSG00000024912	14283	Fosl1	19	5447703	5455945	1	protein_coding	fos-like antigen 1 [Source:MGI Symbol;Acc:MGI:107179]	basic leucine zipper transcription factor(PC00056)	NA	NA	ENSMUSG00000024912
ENSMUSG00000110524	0.389996	-1.1936	2.3128	-0.516087	0.605793	NA	ENSMUSG00000110524	NA	Gm39228	8	94183289	94184969	1	lincRNA	predicted gene, 39228 [Source:MGI Symbol;Acc:MGI:5622113]	NA	NA	NA	ENSMUSG00000110524
ENSMUSG00000088108	0.752132	-1.19335	1.72372	-0.692314	0.48874	NA	ENSMUSG00000088108	NA	Snora47	13	95330600	95330737	1	snoRNA	small nucleolar RNA, H/ACA box 47 [Source:MGI Symbol;Acc:MGI:3819507]	NA	NA	NA	ENSMUSG00000088108
ENSMUSG00000083892	2.80758	-1.19283	0.987124	-1.20839	0.226897	1	ENSMUSG00000083892	NA	Gm1848	X	21146844	21147640	1	processed_pseudogene	predicted gene 1848 [Source:MGI Symbol;Acc:MGI:3037706]	NA	NA	NA	ENSMUSG00000083892
ENSMUSG00000106508	0.161084	-1.19183	4.36624	-0.272964	0.784881	NA	ENSMUSG00000106508	NA	4933425M03Rik	3	85887691	85889234	1	TEC	RIKEN cDNA 4933425M03 gene [Source:MGI Symbol;Acc:MGI:1918440]	NA	NA	NA	ENSMUSG00000106508
ENSMUSG00000082686	0.376013	-1.19183	1.91499	-0.622366	0.533701	NA	ENSMUSG00000082686	NA	Gm12961	4	111790621	111791670	-1	processed_pseudogene	predicted gene 12961 [Source:MGI Symbol;Acc:MGI:3650787]	NA	NA	NA	ENSMUSG00000082686
ENSMUSG00000097614	0.277853	-1.1915	2.98342	-0.399374	0.689617	NA	ENSMUSG00000097614	NA	Gm26508	11	119077573	119081865	1	lincRNA	predicted gene, 26508 [Source:MGI Symbol;Acc:MGI:5477002]	NA	NA	NA	ENSMUSG00000097614
ENSMUSG00000107950	3.71828	-1.19146	0.956448	-1.24571	0.212869	1	ENSMUSG00000107950	NA	Gm6375	6	133761445	133763062	-1	processed_pseudogene	predicted gene 6375 [Source:MGI Symbol;Acc:MGI:3644303]	NA	NA	NA	ENSMUSG00000107950
ENSMUSG00000094152	0.61334	-1.19104	1.82296	-0.653352	0.513529	NA	ENSMUSG00000094152	381884	Slc6a16	7	45241085	45273367	1	protein_coding	solute carrier family 6, member 16 [Source:MGI Symbol;Acc:MGI:2685930]	cation transporter(PC00068)	NA	NA	ENSMUSG00000094152
ENSMUSG00000106261	0.229116	-1.19098	3.50073	-0.340208	0.7337	NA	ENSMUSG00000106261	NA	Gm34086	5	124032361	124076299	1	lincRNA	predicted gene, 34086 [Source:MGI Symbol;Acc:MGI:5593245]	NA	NA	NA	ENSMUSG00000106261
ENSMUSG00000032268	0.318965	-1.19096	3.48933	-0.341314	0.732867	NA	ENSMUSG00000032268	80893	Tmprss5	9	49081260	49117587	1	protein_coding	transmembrane protease, serine 5 (spinesin) [Source:MGI Symbol;Acc:MGI:1933407]	serine protease(PC00203)	NA	NA	ENSMUSG00000032268
ENSMUSG00000086680	0.219663	-1.1909	3.52463	-0.33788	0.735453	NA	ENSMUSG00000086680	NA	Gm11592	11	97280128	97282897	1	antisense_RNA	predicted gene 11592 [Source:MGI Symbol;Acc:MGI:3650504]	NA	NA	NA	ENSMUSG00000086680
ENSMUSG00000100135	0.224572	-1.19072	3.51204	-0.339039	0.734581	NA	ENSMUSG00000100135	NA	Gm28643	2	45156925	45168467	1	lincRNA	predicted gene 28643 [Source:MGI Symbol;Acc:MGI:5579349]	NA	NA	NA	ENSMUSG00000100135
ENSMUSG00000111357	1.16171	-1.1903	0.972411	-1.22407	0.220927	1	ENSMUSG00000111357	NA	AC140363.1	9	51913477	51931661	-1	lincRNA		NA	NA	NA	ENSMUSG00000111357
ENSMUSG00000114453	0.311051	-1.18989	2.59685	-0.458206	0.646804	NA	ENSMUSG00000114453	NA	AC154592.1	14	12618668	12619241	1	processed_pseudogene		NA	NA	NA	ENSMUSG00000114453
ENSMUSG00000116940	1.18922	-1.1897	1.44823	-0.821485	0.41137	1	ENSMUSG00000116940	NA	NA	NA	NA	NA	NA	NA	NA	NA	NA	NA	ENSMUSG00000116940
ENSMUSG00000046748	0.314337	-1.18954	2.59517	-0.458368	0.646688	NA	ENSMUSG00000046748	69457	Tmem45a2	16	57036967	57071346	-1	protein_coding	transmembrane protein 45A2 [Source:MGI Symbol;Acc:MGI:1916707]	NA	NA	NA	ENSMUSG00000046748
ENSMUSG00000042750	0.492948	-1.18933	1.687	-0.705	0.48081	NA	ENSMUSG00000042750	12069	Bex2	X	136066564	136068236	-1	protein_coding	brain expressed X-linked 2 [Source:MGI Symbol;Acc:MGI:1338017]	NA	NA	NA	ENSMUSG00000042750
ENSMUSG00000059912	0.998941	-1.18921	1.65422	-0.718892	0.472207	1	ENSMUSG00000059912	NA	Rpl21-ps6	17	55915403	55915870	-1	processed_pseudogene	ribosomal protein L21, pseudogene 6 [Source:MGI Symbol;Acc:MGI:3643554]	NA	NA	NA	ENSMUSG00000059912
ENSMUSG00000085434	1.59777	-1.18859	0.698192	-1.70238	0.0886841	1	ENSMUSG00000085434	NA	Gm11725	11	117871250	117887416	1	antisense_RNA	predicted gene 11725 [Source:MGI Symbol;Acc:MGI:3649385]	NA	NA	NA	ENSMUSG00000085434
ENSMUSG00000021747	1.32345	-1.18774	1.0276	-1.15584	0.247746	1	ENSMUSG00000021747	74430	4930452B06Rik	14	8431192	8666240	-1	protein_coding	RIKEN cDNA 4930452B06 gene [Source:MGI Symbol;Acc:MGI:1926154]	nuclease(PC00170)	transcription factor(PC00218)	NA	ENSMUSG00000021747
ENSMUSG00000089830	0.419909	-1.18744	1.78541	-0.66508	0.505999	NA	ENSMUSG00000089830	NA	Gm15749	5	120648040	120648749	1	lincRNA	predicted gene 15749 [Source:MGI Symbol;Acc:MGI:3783191]	NA	NA	NA	ENSMUSG00000089830
ENSMUSG00000045019	0.506634	-1.18692	1.71334	-0.69275	0.488466	NA	ENSMUSG00000045019	171168	Acer1	17	56953490	56982126	-1	protein_coding	alkaline ceramidase 1 [Source:MGI Symbol;Acc:MGI:2181962]	NA	NA	NA	ENSMUSG00000045019
ENSMUSG00000107459	0.72056	-1.18686	1.74381	-0.680611	0.496118	NA	ENSMUSG00000107459	NA	Gm5110	6	10171792	10172854	-1	processed_pseudogene	predicted gene 5110 [Source:MGI Symbol;Acc:MGI:3644971]	NA	NA	NA	ENSMUSG00000107459
ENSMUSG00000106926	5.14208	-1.18679	0.737533	-1.60913	0.107587	1	ENSMUSG00000106926	NA	Rpl7-ps7	5	82336851	82337649	1	processed_pseudogene	ribosomal protein L7, pseudogene 7 [Source:MGI Symbol;Acc:MGI:3644615]	NA	NA	NA	ENSMUSG00000106926
ENSMUSG00000082649	0.837738	-1.18665	1.7141	-0.692286	0.488758	NA	ENSMUSG00000082649	NA	Gm12754	4	34389394	34389847	-1	processed_pseudogene	predicted gene 12754 [Source:MGI Symbol;Acc:MGI:3651052]	NA	NA	NA	ENSMUSG00000082649
ENSMUSG00000087482	1.6816	-1.18609	1.00256	-1.18306	0.236787	1	ENSMUSG00000087482	NA	Gm12720	4	103538845	103550682	-1	processed_transcript	predicted gene 12720 [Source:MGI Symbol;Acc:MGI:3651748]	NA	NA	NA	ENSMUSG00000087482
ENSMUSG00000115587	2.93792	-1.18582	1.38557	-0.855838	0.392088	1	ENSMUSG00000115587	NA	NA	NA	NA	NA	NA	NA	NA	NA	NA	NA	ENSMUSG00000115587
ENSMUSG00000116842	0.738769	-1.18565	1.59706	-0.742393	0.457849	NA	ENSMUSG00000116842	NA	NA	NA	NA	NA	NA	NA	NA	NA	NA	NA	ENSMUSG00000116842
ENSMUSG00000114617	2.6833	-1.18551	0.807034	-1.46898	0.141839	1	ENSMUSG00000114617	NA	AC140397.1	13	36252359	36256920	1	TEC		NA	NA	NA	ENSMUSG00000114617
ENSMUSG00000089767	0.138061	-1.1854	5.49303	-0.215801	0.829143	NA	ENSMUSG00000089767	NA	4930556I23Rik	1	37614259	37615372	1	antisense_RNA	RIKEN cDNA 4930556I23 gene [Source:MGI Symbol;Acc:MGI:1922520]	NA	NA	NA	ENSMUSG00000089767
ENSMUSG00000081223	0.346014	-1.18537	2.30887	-0.513401	0.607671	NA	ENSMUSG00000081223	NA	Gm12247	11	58097104	58097773	-1	processed_pseudogene	predicted gene 12247 [Source:MGI Symbol;Acc:MGI:3649489]	NA	NA	NA	ENSMUSG00000081223
ENSMUSG00000092286	0.808442	-1.18525	1.1932	-0.993341	0.320544	NA	ENSMUSG00000092286	NA	Dtnbos	12	3752543	3762146	-1	antisense_RNA	dystrobrevin, beta, opposite strand [Source:MGI Symbol;Acc:MGI:5141913]	NA	NA	NA	ENSMUSG00000092286
ENSMUSG00000108594	0.193866	-1.18512	4.25746	-0.278363	0.780734	NA	ENSMUSG00000108594	NA	Gm44770	6	71802888	71804151	1	TEC	predicted gene 44770 [Source:MGI Symbol;Acc:MGI:5753346]	NA	NA	NA	ENSMUSG00000108594
ENSMUSG00000114333	0.375287	-1.185	2.30772	-0.513494	0.607606	NA	ENSMUSG00000114333	NA	AC139155.1	13	113136083	113144012	1	lincRNA		NA	NA	NA	ENSMUSG00000114333
ENSMUSG00000037973	0.225212	-1.1848	5.1397	-0.23052	0.817688	NA	ENSMUSG00000037973	232016	Ccdc129	6	55836895	55978735	1	protein_coding	coiled-coil domain containing 129 [Source:MGI Symbol;Acc:MGI:2685304]	NA	NA	NA	ENSMUSG00000037973
ENSMUSG00000098006	1.1307	-1.18455	1.3894	-0.852559	0.393904	1	ENSMUSG00000098006	NA	Gm8565	3	69566451	69567464	-1	processed_pseudogene	predicted gene 8565 [Source:MGI Symbol;Acc:MGI:3644126]	NA	NA	NA	ENSMUSG00000098006
ENSMUSG00000109262	0.306549	-1.18446	2.30105	-0.514746	0.606731	NA	ENSMUSG00000109262	NA	Gm44744	7	28054732	28055837	1	lincRNA	predicted gene 44744 [Source:MGI Symbol;Acc:MGI:5753320]	NA	NA	NA	ENSMUSG00000109262
ENSMUSG00000043314	0.285977	-1.18443	2.28115	-0.519225	0.603604	NA	ENSMUSG00000043314	18329	Olfr30	11	58454105	58462270	-1	protein_coding	olfactory receptor 30 [Source:MGI Symbol;Acc:MGI:109305]	NA	NA	NA	ENSMUSG00000043314
ENSMUSG00000107640	0.32334	-1.18443	2.59094	-0.457141	0.647569	NA	ENSMUSG00000107640	NA	Gm38804	6	48613973	48622357	-1	antisense_RNA	predicted gene, 38804 [Source:MGI Symbol;Acc:MGI:5621689]	NA	NA	NA	ENSMUSG00000107640
ENSMUSG00000115151	0.28422	-1.18436	2.58785	-0.457663	0.647194	NA	ENSMUSG00000115151	NA	NA	NA	NA	NA	NA	NA	NA	NA	NA	NA	ENSMUSG00000115151
ENSMUSG00000081497	0.916006	-1.18428	1.45054	-0.816444	0.414246	1	ENSMUSG00000081497	NA	Gm15560	10	7808116	7808758	-1	processed_pseudogene	predicted gene 15560 [Source:MGI Symbol;Acc:MGI:3783009]	NA	NA	NA	ENSMUSG00000081497
ENSMUSG00000106239	0.70419	-1.18419	1.71073	-0.692217	0.488801	NA	ENSMUSG00000106239	NA	Gm9260	12	115982263	115993370	-1	processed_pseudogene	predicted gene 9260 [Source:MGI Symbol;Acc:MGI:3645725]	NA	NA	NA	ENSMUSG00000106239
ENSMUSG00000106553	0.531093	-1.18413	1.86767	-0.634013	0.526073	NA	ENSMUSG00000106553	NA	6720482G16Rik	3	58526930	58528121	1	TEC	RIKEN cDNA 6720482G16 gene [Source:MGI Symbol;Acc:MGI:1925148]	NA	NA	NA	ENSMUSG00000106553
ENSMUSG00000104592	0.919024	-1.18365	1.2842	-0.921705	0.356682	1	ENSMUSG00000104592	NA	Gm42721	3	106007865	106009387	-1	sense_intronic	predicted gene 42721 [Source:MGI Symbol;Acc:MGI:5662858]	NA	NA	NA	ENSMUSG00000104592
ENSMUSG00000076570	5.16452	-1.18356	0.945071	-1.25235	0.210441	1	ENSMUSG00000076570	NA	Igkv12-38	6	69943186	69943648	-1	IG_V_gene	immunoglobulin kappa chain variable 12-38 [Source:MGI Symbol;Acc:MGI:4439614]	immunoglobulin(PC00123)	NA	NA	ENSMUSG00000076570
ENSMUSG00000097973	1.34857	-1.18311	1.38707	-0.852957	0.393683	1	ENSMUSG00000097973	NA	Gm4929	12	13752674	13753665	-1	processed_pseudogene	predicted gene 4929 [Source:MGI Symbol;Acc:MGI:3645941]	NA	NA	NA	ENSMUSG00000097973
ENSMUSG00000076434	0.858035	-1.18309	1.54996	-0.763304	0.445282	NA	ENSMUSG00000076434	71856	Wfdc3	2	164731180	164745931	-1	protein_coding	WAP four-disulfide core domain 3 [Source:MGI Symbol;Acc:MGI:1923897]	serine protease inhibitor(PC00204)	NA	NA	ENSMUSG00000076434
ENSMUSG00000107659	0.442106	-1.18309	1.82102	-0.649684	0.515896	NA	ENSMUSG00000107659	NA	Gm44170	6	88503605	88504277	1	antisense_RNA	predicted gene, 44170 [Source:MGI Symbol;Acc:MGI:5690562]	NA	NA	NA	ENSMUSG00000107659
ENSMUSG00000098141	1.60227	-1.18243	1.45629	-0.811947	0.416822	1	ENSMUSG00000098141	NA	Gm6944	18	55972286	55973291	1	processed_pseudogene	predicted gene 6944 [Source:MGI Symbol;Acc:MGI:3645932]	NA	NA	NA	ENSMUSG00000098141
ENSMUSG00000105939	1.41673	-1.18243	1.00065	-1.18166	0.237342	1	ENSMUSG00000105939	NA	Gm43322	3	126974256	126975867	-1	TEC	predicted gene 43322 [Source:MGI Symbol;Acc:MGI:5663459]	NA	NA	NA	ENSMUSG00000105939
ENSMUSG00000114136	0.404549	-1.1819	2.33343	-0.506507	0.612501	NA	ENSMUSG00000114136	NA	CT010452.1	12	12351522	12392615	-1	antisense_RNA		NA	NA	NA	ENSMUSG00000114136
ENSMUSG00000099009	3.17113	-1.18147	1.87272	-0.630881	0.528118	1	ENSMUSG00000099009	NA	Rdh16f1	10	127759787	127792694	1	protein_coding	RDH16 family member 1 [Source:MGI Symbol;Acc:MGI:5547782]	dehydrogenase(PC00092)	reductase(PC00198)	NA	ENSMUSG00000099009
ENSMUSG00000041377	0.607114	-1.18147	1.4454	-0.817396	0.413702	NA	ENSMUSG00000041377	29862	Ninj2	6	120093350	120200339	1	protein_coding	ninjurin 2 [Source:MGI Symbol;Acc:MGI:1352751]	cell adhesion molecule(PC00069)	NA	NA	ENSMUSG00000041377
ENSMUSG00000102909	1.76951	-1.18109	1.35807	-0.869681	0.384475	1	ENSMUSG00000102909	NA	Gm2453	1	167285068	167289856	1	lincRNA	predicted gene 2453 [Source:MGI Symbol;Acc:MGI:3780620]	NA	NA	NA	ENSMUSG00000102909
ENSMUSG00000102859	0.33424	-1.18067	2.59871	-0.454329	0.649592	NA	ENSMUSG00000102859	NA	Gm8625	3	73933046	73934122	1	processed_pseudogene	predicted gene 8625 [Source:MGI Symbol;Acc:MGI:3644686]	NA	NA	NA	ENSMUSG00000102859
ENSMUSG00000117123	0.188131	-1.18065	5.25948	-0.22448	0.822384	NA	ENSMUSG00000117123	NA	NA	NA	NA	NA	NA	NA	NA	NA	NA	NA	ENSMUSG00000117123
ENSMUSG00000077611	0.804545	-1.18037	1.6084	-0.733878	0.463023	NA	ENSMUSG00000077611	NA	Gm23946	14	32191854	32192050	-1	snoRNA	predicted gene, 23946 [Source:MGI Symbol;Acc:MGI:5453723]	NA	NA	NA	ENSMUSG00000077611
ENSMUSG00000104514	1.34713	-1.18034	1.75737	-0.671653	0.501805	1	ENSMUSG00000104514	NA	Gm37164	3	13669509	13670145	-1	processed_pseudogene	predicted gene, 37164 [Source:MGI Symbol;Acc:MGI:5610392]	NA	NA	NA	ENSMUSG00000104514
ENSMUSG00000096726	6.27806	-1.18008	0.685197	-1.72225	0.0850245	1	ENSMUSG00000096726	NA	Gm5558	5	91806579	91807073	-1	processed_pseudogene	predicted gene 5558 [Source:MGI Symbol;Acc:MGI:3644616]	NA	NA	NA	ENSMUSG00000096726
ENSMUSG00000085403	1.44559	-1.17994	1.15466	-1.02189	0.306831	1	ENSMUSG00000085403	NA	Gm13068	4	149748518	149749607	1	antisense_RNA	predicted gene 13068 [Source:MGI Symbol;Acc:MGI:3651967]	NA	NA	NA	ENSMUSG00000085403
ENSMUSG00000106415	0.701902	-1.17979	1.61866	-0.728869	0.466082	NA	ENSMUSG00000106415	NA	Gm42893	3	116629173	116630984	-1	antisense_RNA	predicted gene 42893 [Source:MGI Symbol;Acc:MGI:5663030]	NA	NA	NA	ENSMUSG00000106415
ENSMUSG00000117270	0.417815	-1.17975	1.92868	-0.611688	0.540744	NA	ENSMUSG00000117270	NA	NA	NA	NA	NA	NA	NA	NA	NA	NA	NA	ENSMUSG00000117270
ENSMUSG00000090728	0.377293	-1.1797	2.33774	-0.504635	0.613815	NA	ENSMUSG00000090728	NA	Gm17420	5	116032146	116032313	-1	pseudogene	predicted gene, 17420 [Source:MGI Symbol;Acc:MGI:4937054]	NA	NA	NA	ENSMUSG00000090728
ENSMUSG00000111753	0.129379	-1.17969	5.49322	-0.214753	0.82996	NA	ENSMUSG00000111753	NA	AC115300.1	10	35478827	35485396	-1	lincRNA		NA	NA	NA	ENSMUSG00000111753
ENSMUSG00000051054	0.484775	-1.17961	2.72386	-0.433064	0.664968	NA	ENSMUSG00000051054	102638268	1700014D04Rik	13	59740842	59746752	-1	protein_coding	RIKEN cDNA 1700014D04 gene [Source:MGI Symbol;Acc:MGI:1921474]	NA	NA	NA	ENSMUSG00000051054
ENSMUSG00000106311	0.312893	-1.17945	3.28761	-0.358755	0.719778	NA	ENSMUSG00000106311	NA	Gm43755	5	30366046	30366490	1	sense_intronic	predicted gene 43755 [Source:MGI Symbol;Acc:MGI:5663892]	NA	NA	NA	ENSMUSG00000106311
ENSMUSG00000110814	1.10422	-1.17914	1.27393	-0.925594	0.354657	1	ENSMUSG00000110814	NA	AC131660.1	9	121523575	121530805	1	lincRNA		NA	NA	NA	ENSMUSG00000110814
ENSMUSG00000084512	0.329186	-1.17914	2.97417	-0.396458	0.691767	NA	ENSMUSG00000084512	NA	Gm22482	19	32969950	32970308	-1	misc_RNA	predicted gene, 22482 [Source:MGI Symbol;Acc:MGI:5452259]	NA	NA	NA	ENSMUSG00000084512
ENSMUSG00000095159	1.13355	-1.17792	1.63918	-0.7186	0.472387	1	ENSMUSG00000095159	NA	Tubb4b-ps1	5	7179365	7180700	1	processed_pseudogene	tubulin, beta 4B class IVB, pseudogene 1 [Source:MGI Symbol;Acc:MGI:3642800]	NA	NA	NA	ENSMUSG00000095159
ENSMUSG00000113792	0.772574	-1.17784	1.47531	-0.798366	0.424658	NA	ENSMUSG00000113792	NA	AC140376.1	12	35055101	35056961	1	TEC		NA	NA	NA	ENSMUSG00000113792
ENSMUSG00000087617	0.773217	-1.17729	1.59521	-0.738014	0.460506	NA	ENSMUSG00000087617	NA	Gm14268	2	166380828	166398187	-1	lincRNA	predicted gene 14268 [Source:MGI Symbol;Acc:MGI:3649848]	NA	NA	NA	ENSMUSG00000087617
ENSMUSG00000083982	1.40732	-1.17687	1.41321	-0.832765	0.404978	1	ENSMUSG00000083982	NA	Gm14650	X	58630400	58631288	-1	processed_pseudogene	predicted gene 14650 [Source:MGI Symbol;Acc:MGI:3644080]	NA	NA	NA	ENSMUSG00000083982
ENSMUSG00000067215	1.68703	-1.17685	1.39918	-0.841102	0.400291	1	ENSMUSG00000067215	635253	Usp51	X	153006469	153009416	1	protein_coding	ubiquitin specific protease 51 [Source:MGI Symbol;Acc:MGI:3588217]	cysteine protease(PC00081)	NA	NA	ENSMUSG00000067215
ENSMUSG00000106529	0.771123	-1.17635	1.42301	-0.826665	0.408427	NA	ENSMUSG00000106529	NA	Gm18451	5	54569905	54578012	1	processed_pseudogene	predicted gene, 18451 [Source:MGI Symbol;Acc:MGI:5010636]	NA	NA	NA	ENSMUSG00000106529
ENSMUSG00000051182	2.19705	-1.17633	1.04604	-1.12456	0.260774	1	ENSMUSG00000051182	258817	Olfr655	7	104595301	104601779	-1	protein_coding	olfactory receptor 655 [Source:MGI Symbol;Acc:MGI:3030489]	NA	NA	NA	ENSMUSG00000051182
ENSMUSG00000104433	0.424679	-1.17618	1.7927	-0.656091	0.511765	NA	ENSMUSG00000104433	NA	Gm37426	1	32710179	32712648	1	TEC	predicted gene, 37426 [Source:MGI Symbol;Acc:MGI:5610654]	NA	NA	NA	ENSMUSG00000104433
ENSMUSG00000077382	0.466792	-1.17603	1.83546	-0.640726	0.5217	NA	ENSMUSG00000077382	NA	n-R5s200	2	84700748	84700860	-1	rRNA	nuclear encoded rRNA 5S 200 [Source:MGI Symbol;Acc:MGI:4422065]	NA	NA	NA	ENSMUSG00000077382
ENSMUSG00000102258	2.34127	-1.17541	0.748067	-1.57126	0.116123	1	ENSMUSG00000102258	NA	Gm38257	2	15056713	15059473	1	TEC	predicted gene, 38257 [Source:MGI Symbol;Acc:MGI:5611485]	NA	NA	NA	ENSMUSG00000102258
ENSMUSG00000097104	0.319041	-1.17539	2.05451	-0.572104	0.567252	NA	ENSMUSG00000097104	NA	Gm26579	10	116674591	116679303	1	lincRNA	predicted gene, 26579 [Source:MGI Symbol;Acc:MGI:5477073]	NA	NA	NA	ENSMUSG00000097104
ENSMUSG00000085523	0.33955	-1.17533	2.07976	-0.56513	0.571985	NA	ENSMUSG00000085523	NA	Gm15945	15	75661407	75663529	1	antisense_RNA	predicted gene 15945 [Source:MGI Symbol;Acc:MGI:3801876]	NA	NA	NA	ENSMUSG00000085523
ENSMUSG00000101026	2.46181	-1.17507	1.41676	-0.829407	0.406874	1	ENSMUSG00000101026	NA	D730001G18Rik	15	74770908	74778859	-1	protein_coding	RIKEN cDNA D730001G18 gene [Source:MGI Symbol;Acc:MGI:1925975]	NA	NA	NA	ENSMUSG00000101026
ENSMUSG00000082467	0.253803	-1.17506	2.58329	-0.454869	0.649203	NA	ENSMUSG00000082467	NA	Gm6743	X	61830510	61831575	1	processed_pseudogene	predicted pseudogene 6743 [Source:MGI Symbol;Acc:MGI:3648616]	NA	NA	NA	ENSMUSG00000082467
ENSMUSG00000071867	0.600261	-1.17505	3.04404	-0.386018	0.699484	NA	ENSMUSG00000071867	NA	Gm6304	18	15011246	15011692	1	processed_pseudogene	predicted gene 6304 [Source:MGI Symbol;Acc:MGI:3647929]	NA	NA	NA	ENSMUSG00000071867
ENSMUSG00000056073	1.64602	-1.17467	1.02791	-1.14277	0.253136	1	ENSMUSG00000056073	14806	Grik2	10	49094833	49788766	-1	protein_coding	glutamate receptor, ionotropic, kainate 2 (beta 2) [Source:MGI Symbol;Acc:MGI:95815]	NA	NA	NA	ENSMUSG00000056073
ENSMUSG00000082877	0.303474	-1.17464	2.94525	-0.398825	0.690022	NA	ENSMUSG00000082877	NA	Gm13009	4	136074513	136074972	-1	processed_pseudogene	predicted gene 13009 [Source:MGI Symbol;Acc:MGI:3651086]	NA	NA	NA	ENSMUSG00000082877
ENSMUSG00000103325	0.343635	-1.17451	2.31646	-0.507027	0.612136	NA	ENSMUSG00000103325	NA	Gm10531	1	157043547	157045849	1	TEC	predicted gene 10531 [Source:MGI Symbol;Acc:MGI:3641983]	NA	NA	NA	ENSMUSG00000103325
ENSMUSG00000104266	0.583747	-1.17447	1.63028	-0.720411	0.471272	NA	ENSMUSG00000104266	NA	Gm37748	1	170175180	170176319	1	lincRNA	predicted gene, 37748 [Source:MGI Symbol;Acc:MGI:5610976]	NA	NA	NA	ENSMUSG00000104266
ENSMUSG00000056078	0.534086	-1.17435	1.64364	-0.714483	0.474928	NA	ENSMUSG00000056078	78753	Lipm	19	34100943	34122687	1	protein_coding	lipase, family member M [Source:MGI Symbol;Acc:MGI:1926003]	lipase(PC00143)	serine protease(PC00203)	NA	ENSMUSG00000056078
ENSMUSG00000113877	0.234387	-1.17428	2.97081	-0.395271	0.692643	NA	ENSMUSG00000113877	NA	AC155266.1	12	99761351	99762254	-1	TEC		NA	NA	NA	ENSMUSG00000113877
ENSMUSG00000045008	0.22114	-1.17426	2.99731	-0.391771	0.695227	NA	ENSMUSG00000045008	NA	9030612E09Rik	10	43174704	43176562	1	protein_coding	RIKEN cDNA 9030612E09 gene [Source:MGI Symbol;Acc:MGI:1921780]	NA	NA	NA	ENSMUSG00000045008
ENSMUSG00000066196	1.79153	-1.17412	0.908368	-1.29256	0.196163	1	ENSMUSG00000066196	433700	Spag8	4	43651335	43653594	-1	protein_coding	sperm associated antigen 8 [Source:MGI Symbol;Acc:MGI:3056295]	NA	NA	NA	ENSMUSG00000066196
ENSMUSG00000065044	0.129314	-1.17412	5.4934	-0.213732	0.830756	NA	ENSMUSG00000065044	NA	n-R5s169	5	3561154	3561273	1	rRNA	nuclear encoded rRNA 5S 169 [Source:MGI Symbol;Acc:MGI:4422033]	NA	NA	NA	ENSMUSG00000065044
ENSMUSG00000091419	0.513805	-1.17306	1.73211	-0.677244	0.498251	NA	ENSMUSG00000091419	NA	Gm17450	13	91220452	91220878	1	pseudogene	predicted gene, 17450 [Source:MGI Symbol;Acc:MGI:4937084]	NA	NA	NA	ENSMUSG00000091419
ENSMUSG00000086443	4.49102	-1.1729	1.32128	-0.887699	0.374703	1	ENSMUSG00000086443	NA	4933421A08Rik	4	122961309	122963475	1	processed_transcript	RIKEN cDNA 4933421A08 gene [Source:MGI Symbol;Acc:MGI:1918347]	NA	NA	NA	ENSMUSG00000086443
ENSMUSG00000105512	0.631836	-1.17285	1.75794	-0.667173	0.504661	NA	ENSMUSG00000105512	NA	Gm43714	3	88685024	88686397	-1	antisense_RNA	predicted gene 43714 [Source:MGI Symbol;Acc:MGI:5663851]	NA	NA	NA	ENSMUSG00000105512
ENSMUSG00000035852	0.672424	-1.17277	1.692	-0.693127	0.48823	NA	ENSMUSG00000035852	78906	Misp	10	79820989	79830490	1	protein_coding	mitotic spindle positioning [Source:MGI Symbol;Acc:MGI:1926156]	NA	NA	NA	ENSMUSG00000035852
ENSMUSG00000082362	0.968195	-1.17173	1.47596	-0.793875	0.427268	1	ENSMUSG00000082362	NA	Gm5187	12	107205076	107206066	-1	processed_pseudogene	predicted gene 5187 [Source:MGI Symbol;Acc:MGI:3644132]	NA	NA	NA	ENSMUSG00000082362
ENSMUSG00000105720	0.59625	-1.1717	1.60417	-0.730409	0.46514	NA	ENSMUSG00000105720	NA	Gm42440	5	131932396	131934679	-1	TEC	predicted gene 42440 [Source:MGI Symbol;Acc:MGI:5662577]	NA	NA	NA	ENSMUSG00000105720
ENSMUSG00000092577	0.414588	-1.17163	2.1097	-0.555354	0.578653	NA	ENSMUSG00000092577	NA	Gm7393	17	14941965	14942703	1	processed_pseudogene	predicted gene 7393 [Source:MGI Symbol;Acc:MGI:3648357]	NA	NA	NA	ENSMUSG00000092577
ENSMUSG00000096474	2.34077	-1.17108	1.00697	-1.16296	0.244844	1	ENSMUSG00000096474	NA	Gm5561	1	179520378	179520857	-1	processed_pseudogene	predicted gene 5561 [Source:MGI Symbol;Acc:MGI:3804971]	NA	NA	NA	ENSMUSG00000096474
ENSMUSG00000103999	0.743752	-1.17091	1.5072	-0.776875	0.437232	NA	ENSMUSG00000103999	NA	Gm38026	1	128097591	128101470	-1	TEC	predicted gene, 38026 [Source:MGI Symbol;Acc:MGI:5611254]	NA	NA	NA	ENSMUSG00000103999
ENSMUSG00000101531	0.590642	-1.17078	3.12959	-0.374101	0.70833	NA	ENSMUSG00000101531	NA	Gm29672	Y	59489253	59492035	1	lincRNA	predicted gene 29672 [Source:MGI Symbol;Acc:MGI:5580378]	NA	NA	NA	ENSMUSG00000101531
ENSMUSG00000040705	11.4979	-1.17071	0.540346	-2.16659	0.0302659	1	ENSMUSG00000040705	NA	A930016O22Rik	7	19417466	19421417	-1	antisense_RNA	RIKEN cDNA A930016O22 gene [Source:MGI Symbol;Acc:MGI:3605623]	NA	NA	NA	ENSMUSG00000040705
ENSMUSG00000036422	0.765939	-1.17032	2.2602	-0.517795	0.604601	NA	ENSMUSG00000036422	18530	Pcdh8	14	79766775	79771312	-1	protein_coding	protocadherin 8 [Source:MGI Symbol;Acc:MGI:1306800]	NA	NA	NA	ENSMUSG00000036422
ENSMUSG00000097825	0.446961	-1.16988	1.74329	-0.671076	0.502172	NA	ENSMUSG00000097825	NA	9630001P10Rik	5	45638699	45645469	1	antisense_RNA	RIKEN cDNA 9630001P10 gene [Source:MGI Symbol;Acc:MGI:2441755]	NA	NA	NA	ENSMUSG00000097825
ENSMUSG00000114505	0.555523	-1.16982	1.74843	-0.669068	0.503452	NA	ENSMUSG00000114505	NA	AC154252.2	13	79838077	79838843	1	processed_pseudogene		NA	NA	NA	ENSMUSG00000114505
ENSMUSG00000094018	0.307606	-1.16974	2.29738	-0.509162	0.610638	NA	ENSMUSG00000094018	628324	S100a2	3	90590247	90591508	1	protein_coding	S100 calcium binding protein A2 [Source:MGI Symbol;Acc:MGI:3510999]	calmodulin(PC00061)	growth factor(PC00112)	NA	ENSMUSG00000094018
ENSMUSG00000035914	54.665	-1.16952	0.583433	-2.00455	0.0450114	1	ENSMUSG00000035914	102657	Cd276	9	58524298	58555437	-1	protein_coding	CD276 antigen [Source:MGI Symbol;Acc:MGI:2183926]	protease inhibitor(PC00191)	NA	NA	ENSMUSG00000035914
ENSMUSG00000116941	0.576653	-1.16918	1.59096	-0.734893	0.462405	NA	ENSMUSG00000116941	NA	NA	NA	NA	NA	NA	NA	NA	NA	NA	NA	ENSMUSG00000116941
ENSMUSG00000096914	0.655953	-1.16862	1.59064	-0.734684	0.462532	NA	ENSMUSG00000096914	270049	Galntl6	8	57774052	58912640	-1	protein_coding	UDP-N-acetyl-alpha-D-galactosamine:polypeptide N-acetylgalactosaminyltransferase-like 6 [Source:MGI Symbol;Acc:MGI:1913581]	glycosyltransferase(PC00111)	NA	NA	ENSMUSG00000096914
ENSMUSG00000032262	2.33112	-1.16816	1.15338	-1.01281	0.31115	1	ENSMUSG00000032262	83603	Elovl4	9	83778692	83806277	-1	protein_coding	elongation of very long chain fatty acids (FEN1/Elo2, SUR4/Elo3, yeast)-like 4 [Source:MGI Symbol;Acc:MGI:1933331]	acyltransferase(PC00042)	NA	NA	ENSMUSG00000032262
ENSMUSG00000089883	2.1883	-1.16782	0.997352	-1.17092	0.241632	1	ENSMUSG00000089883	NA	Gm3355	17	13862317	13862803	-1	processed_pseudogene	predicted gene 3355 [Source:MGI Symbol;Acc:MGI:3781533]	NA	NA	NA	ENSMUSG00000089883
ENSMUSG00000087436	0.128831	-1.16781	5.49361	-0.212576	0.831657	NA	ENSMUSG00000087436	NA	Gm16156	8	105934333	105945843	1	antisense_RNA	predicted gene 16156 [Source:MGI Symbol;Acc:MGI:3801720]	NA	NA	NA	ENSMUSG00000087436
ENSMUSG00000104622	0.128789	-1.16726	5.49363	-0.212476	0.831736	NA	ENSMUSG00000104622	NA	Gm42541	3	154139097	154141345	1	TEC	predicted gene 42541 [Source:MGI Symbol;Acc:MGI:5662678]	NA	NA	NA	ENSMUSG00000104622
ENSMUSG00000034391	1.47883	-1.1672	1.54414	-0.755893	0.449713	1	ENSMUSG00000034391	50764	Fbxo15	18	84934782	84981472	1	protein_coding	F-box protein 15 [Source:MGI Symbol;Acc:MGI:1354755]	NA	NA	NA	ENSMUSG00000034391
ENSMUSG00000105979	0.856136	-1.16701	1.44506	-0.807586	0.419329	NA	ENSMUSG00000105979	NA	Gm43411	5	122906822	122908400	-1	TEC	predicted gene 43411 [Source:MGI Symbol;Acc:MGI:5663548]	NA	NA	NA	ENSMUSG00000105979
ENSMUSG00000098492	2.60252	-1.16696	0.93685	-1.24562	0.212905	1	ENSMUSG00000098492	NA	Gm19353	9	72289667	72290111	1	processed_pseudogene	predicted gene, 19353 [Source:MGI Symbol;Acc:MGI:5011538]	NA	NA	NA	ENSMUSG00000098492
ENSMUSG00000104575	0.136622	-1.16666	5.49365	-0.212365	0.831822	NA	ENSMUSG00000104575	NA	Igkv9-119	6	68056345	68056810	1	IG_V_pseudogene	immunoglobulin kappa chain variable 9-119 [Source:MGI Symbol;Acc:MGI:5009881]	NA	NA	NA	ENSMUSG00000104575
ENSMUSG00000055333	0.279409	-1.16589	2.28448	-0.510353	0.609804	NA	ENSMUSG00000055333	245827	Fat2	11	55250609	55336564	-1	protein_coding	FAT atypical cadherin 2 [Source:MGI Symbol;Acc:MGI:2685369]	NA	NA	NA	ENSMUSG00000055333
ENSMUSG00000103786	0.687666	-1.16588	1.72518	-0.675801	0.499167	NA	ENSMUSG00000103786	NA	Gm37525	2	3351134	3354004	-1	sense_intronic	predicted gene, 37525 [Source:MGI Symbol;Acc:MGI:5610753]	NA	NA	NA	ENSMUSG00000103786
ENSMUSG00000073420	0.505383	-1.16455	2.39558	-0.486124	0.626879	NA	ENSMUSG00000073420	NA	Btnl5-ps	17	34488070	34497429	-1	transcribed_unprocessed_pseudogene	butyrophilin-like 5, pseudogene [Source:MGI Symbol;Acc:MGI:1932037]	NA	NA	NA	ENSMUSG00000073420
ENSMUSG00000098802	0.466597	-1.16445	2.41003	-0.483169	0.628976	NA	ENSMUSG00000098802	NA	Mir7046	7	24970010	24970075	-1	miRNA	microRNA 7046 [Source:MGI Symbol;Acc:MGI:5530851]	NA	NA	NA	ENSMUSG00000098802
ENSMUSG00000025529	5.5158	-1.1643	0.787932	-1.47767	0.139496	1	ENSMUSG00000025529	245595	Zfp711	X	112600526	112635070	1	protein_coding	zinc finger protein 711 [Source:MGI Symbol;Acc:MGI:3045342]	NA	NA	NA	ENSMUSG00000025529
ENSMUSG00000115426	0.317836	-1.1639	2.58737	-0.449839	0.652827	NA	ENSMUSG00000115426	NA	NA	NA	NA	NA	NA	NA	NA	NA	NA	NA	ENSMUSG00000115426
ENSMUSG00000107336	3.52483	-1.16351	1.13325	-1.0267	0.304561	1	ENSMUSG00000107336	NA	Gm43461	5	147427738	147428733	1	TEC	predicted gene 43461 [Source:MGI Symbol;Acc:MGI:5663598]	NA	NA	NA	ENSMUSG00000107336
ENSMUSG00000112280	103.713	-1.16302	0.902253	-1.28902	NA	NA	ENSMUSG00000112280	NA	AC153962.3	10	33987216	33995055	-1	processed_transcript		NA	NA	NA	ENSMUSG00000112280
ENSMUSG00000043857	0.183583	-1.1625	5.49379	-0.211603	0.832417	NA	ENSMUSG00000043857	268510	Mgat5b	11	116918863	116986948	1	protein_coding	mannoside acetylglucosaminyltransferase 5, isoenzyme B [Source:MGI Symbol;Acc:MGI:3606200]	glycosyltransferase(PC00111)	NA	NA	ENSMUSG00000043857
ENSMUSG00000034057	0.381993	-1.16216	2.09209	-0.555501	0.578552	NA	ENSMUSG00000034057	237558	Myrfl	10	116776535	116896919	-1	protein_coding	myelin regulatory factor-like [Source:MGI Symbol;Acc:MGI:2685085]	NA	NA	NA	ENSMUSG00000034057
ENSMUSG00000084146	0.536118	-1.16204	1.62977	-0.713006	0.475842	NA	ENSMUSG00000084146	NA	Gm12104	11	30906942	30907920	-1	processed_pseudogene	predicted gene 12104 [Source:MGI Symbol;Acc:MGI:3650164]	NA	NA	NA	ENSMUSG00000084146
ENSMUSG00000106590	2.81275	-1.16099	0.851278	-1.36382	0.172626	1	ENSMUSG00000106590	NA	Gm42879	5	121593695	121595908	1	TEC	predicted gene 42879 [Source:MGI Symbol;Acc:MGI:5663016]	NA	NA	NA	ENSMUSG00000106590
ENSMUSG00000113258	3.14107	-1.16016	1.53516	-0.755729	0.449812	1	ENSMUSG00000113258	NA	CT009546.1	13	13890760	13891999	-1	processed_pseudogene		NA	NA	NA	ENSMUSG00000113258
ENSMUSG00000105731	3.27801	-1.15908	0.589697	-1.96555	0.049351	1	ENSMUSG00000105731	NA	Gm43063	3	103096746	103097826	1	sense_intronic	predicted gene 43063 [Source:MGI Symbol;Acc:MGI:5663200]	NA	NA	NA	ENSMUSG00000105731
ENSMUSG00000033805	2.77161	-1.15876	0.968649	-1.19627	0.231593	1	ENSMUSG00000033805	384214	Ephx4	5	107402736	107430035	1	protein_coding	epoxide hydrolase 4 [Source:MGI Symbol;Acc:MGI:2686228]	serine protease(PC00203)	NA	NA	ENSMUSG00000033805
ENSMUSG00000106532	0.525807	-1.15872	1.74814	-0.66283	0.50744	NA	ENSMUSG00000106532	NA	Gm5714	5	6748892	6749457	-1	processed_pseudogene	predicted gene 5714 [Source:MGI Symbol;Acc:MGI:3645857]	NA	NA	NA	ENSMUSG00000106532
ENSMUSG00000082085	0.47141	-1.15712	1.70377	-0.679153	0.497041	NA	ENSMUSG00000082085	NA	Gm6441	X	145264831	145265526	-1	processed_pseudogene	predicted gene 6441 [Source:MGI Symbol;Acc:MGI:3646924]	NA	NA	NA	ENSMUSG00000082085
ENSMUSG00000022144	0.188529	-1.15617	4.2759	-0.270392	0.786859	NA	ENSMUSG00000022144	14573	Gdnf	15	7811011	7837575	1	protein_coding	glial cell line derived neurotrophic factor [Source:MGI Symbol;Acc:MGI:107430]	neurotrophic factor(PC00163)	NA	NA	ENSMUSG00000022144
ENSMUSG00000083326	0.461003	-1.15583	1.96999	-0.58672	0.557392	NA	ENSMUSG00000083326	NA	Rpl38-ps1	4	138425788	138426002	1	processed_pseudogene	ribosomal protein L38, pseudogene 1 [Source:MGI Symbol;Acc:MGI:3649580]	NA	NA	NA	ENSMUSG00000083326
ENSMUSG00000108643	1.11318	-1.15526	1.20295	-0.960356	0.336876	1	ENSMUSG00000108643	NA	Gm44931	7	80603239	80603783	-1	TEC	predicted gene 44931 [Source:MGI Symbol;Acc:MGI:5753507]	NA	NA	NA	ENSMUSG00000108643
ENSMUSG00000100303	5.82749	-1.15468	0.654454	-1.76433	0.0776759	1	ENSMUSG00000100303	NA	2600014E21Rik	2	75138842	75322897	1	antisense_RNA	RIKEN cDNA 2600014E21 gene [Source:MGI Symbol;Acc:MGI:1919384]	NA	NA	NA	ENSMUSG00000100303
ENSMUSG00000040412	1.29849	-1.15449	1.55438	-0.742732	0.457644	1	ENSMUSG00000040412	229722	5330417C22Rik	3	108455694	108536536	-1	protein_coding	RIKEN cDNA 5330417C22 gene [Source:MGI Symbol;Acc:MGI:1923930]	NA	NA	NA	ENSMUSG00000040412
ENSMUSG00000102694	2.34626	-1.15394	0.85184	-1.35465	0.17553	1	ENSMUSG00000102694	NA	Gm37496	12	104021919	104024427	-1	TEC	predicted gene, 37496 [Source:MGI Symbol;Acc:MGI:5610724]	NA	NA	NA	ENSMUSG00000102694
ENSMUSG00000106463	1.58318	-1.15388	0.995957	-1.15856	0.246635	1	ENSMUSG00000106463	NA	Mir1291	15	98519762	98519878	-1	miRNA	microRNA 1291 [Source:MGI Symbol;Acc:MGI:5562744]	NA	NA	NA	ENSMUSG00000106463
ENSMUSG00000038665	1.27162	-1.15332	1.37584	-0.838264	0.401883	1	ENSMUSG00000038665	320127	Dgki	6	36846022	37300184	-1	protein_coding	diacylglycerol kinase, iota [Source:MGI Symbol;Acc:MGI:2443430]	kinase(PC00137)	NA	NA	ENSMUSG00000038665
ENSMUSG00000082947	0.628027	-1.15302	1.62458	-0.709738	0.477866	NA	ENSMUSG00000082947	NA	Gm12587	11	121886542	121886968	-1	processed_pseudogene	predicted gene 12587 [Source:MGI Symbol;Acc:MGI:3649689]	NA	NA	NA	ENSMUSG00000082947
ENSMUSG00000042357	3.31015	-1.15242	0.974644	-1.1824	0.237047	1	ENSMUSG00000042357	14622	Gjb5	4	127354809	127358181	-1	protein_coding	gap junction protein, beta 5 [Source:MGI Symbol;Acc:MGI:95723]	gap junction(PC00105)	NA	NA	ENSMUSG00000042357
ENSMUSG00000040606	111.41	-1.15067	0.519649	-2.21432	0.026807	1	ENSMUSG00000040606	71529	Kazn	4	142102390	142239401	-1	protein_coding	kazrin, periplakin interacting protein [Source:MGI Symbol;Acc:MGI:1918779]	NA	NA	NA	ENSMUSG00000040606
ENSMUSG00000097595	0.343808	-1.15051	3.43889	-0.334559	0.737957	NA	ENSMUSG00000097595	NA	1500002F19Rik	7	132874739	132931197	-1	processed_transcript	RIKEN cDNA 1500002F19 gene [Source:MGI Symbol;Acc:MGI:1923933]	NA	NA	NA	ENSMUSG00000097595
ENSMUSG00000111205	0.191278	-1.15012	4.26246	-0.269825	0.787295	NA	ENSMUSG00000111205	NA	AC159308.3	9	22260102	22263289	1	bidirectional_promoter_lncRNA		NA	NA	NA	ENSMUSG00000111205
ENSMUSG00000029343	0.642901	-1.15007	1.60728	-0.715538	0.474277	NA	ENSMUSG00000029343	12960	Crybb1	5	112255815	112269585	1	protein_coding	crystallin, beta B1 [Source:MGI Symbol;Acc:MGI:104992]	NA	NA	NA	ENSMUSG00000029343
ENSMUSG00000034177	37.5972	-1.14918	0.597226	-1.92419	0.0543305	1	ENSMUSG00000034177	207742	Rnf43	11	87662722	87735539	1	protein_coding	ring finger protein 43 [Source:MGI Symbol;Acc:MGI:2442609]	NA	NA	NA	ENSMUSG00000034177
ENSMUSG00000076758	1.02844	-1.14885	1.18856	-0.966587	0.333751	1	ENSMUSG00000076758	NA	Trav1	14	52427928	52428876	1	TR_V_gene	T cell receptor alpha variable 1 [Source:MGI Symbol;Acc:MGI:3651476]	immunoglobulin receptor superfamily(PC00124)	NA	NA	ENSMUSG00000076758
ENSMUSG00000070568	2.71408	-1.14858	0.995064	-1.15427	0.248388	1	ENSMUSG00000070568	76713	Slc6a21	7	45277513	45288998	1	protein_coding	solute carrier family 6 member 21 [Source:MGI Symbol;Acc:MGI:1923963]	cation transporter(PC00068)	NA	NA	ENSMUSG00000070568
ENSMUSG00000116884	0.413972	-1.14845	2.11562	-0.542844	0.587237	NA	ENSMUSG00000116884	NA	NA	NA	NA	NA	NA	NA	NA	NA	NA	NA	ENSMUSG00000116884
ENSMUSG00000097751	0.735691	-1.14834	1.47093	-0.780689	0.434986	NA	ENSMUSG00000097751	NA	Gm26690	7	127982570	127984881	-1	lincRNA	predicted gene, 26690 [Source:MGI Symbol;Acc:MGI:5477184]	NA	NA	NA	ENSMUSG00000097751
ENSMUSG00000111646	0.163545	-1.14826	5.49427	-0.208992	0.834455	NA	ENSMUSG00000111646	NA	AC153912.5	10	29366740	29374945	1	lincRNA		NA	NA	NA	ENSMUSG00000111646
ENSMUSG00000101257	0.392068	-1.14808	1.90477	-0.602741	0.546681	NA	ENSMUSG00000101257	NA	2310015K22Rik	1	80225044	80228792	1	lincRNA	RIKEN cDNA 2310015K22 gene [Source:MGI Symbol;Acc:MGI:1916815]	NA	NA	NA	ENSMUSG00000101257
ENSMUSG00000073794	0.412367	-1.14767	1.92306	-0.596794	0.550645	NA	ENSMUSG00000073794	NA	I0C0044D17Rik	4	98818475	98823840	-1	protein_coding	RIKEN cDNA I0C0044D17 gene [Source:MGI Symbol;Acc:MGI:3588230]	NA	NA	NA	ENSMUSG00000073794
ENSMUSG00000111294	0.355586	-1.14663	2.29627	-0.499345	0.617536	NA	ENSMUSG00000111294	NA	AC183268.1	9	47964476	47967312	1	TEC		NA	NA	NA	ENSMUSG00000111294
ENSMUSG00000031519	1.20484	-1.14367	1.58187	-0.722983	0.46969	1	ENSMUSG00000031519	76294	Asb5	8	54529580	54587842	1	protein_coding	ankyrin repeat and SOCs box-containing 5 [Source:MGI Symbol;Acc:MGI:1923544]	NA	NA	NA	ENSMUSG00000031519
ENSMUSG00000115410	0.340363	-1.14341	2.6097	-0.438139	0.661285	NA	ENSMUSG00000115410	NA	NA	NA	NA	NA	NA	NA	NA	NA	NA	NA	ENSMUSG00000115410
ENSMUSG00000107911	1.08566	-1.14319	1.09156	-1.0473	0.294959	1	ENSMUSG00000107911	NA	Gm7565	14	26565766	26566388	1	processed_pseudogene	predicted gene 7565 [Source:MGI Symbol;Acc:MGI:3645254]	NA	NA	NA	ENSMUSG00000107911
ENSMUSG00000028860	39.7482	-1.14244	0.438691	-2.60419	0.00920909	1	ENSMUSG00000028860	269589	Sytl1	4	133253090	133263113	-1	protein_coding	synaptotagmin-like 1 [Source:MGI Symbol;Acc:MGI:1933365]	NA	NA	NA	ENSMUSG00000028860
ENSMUSG00000036949	0.627873	-1.13974	2.11279	-0.539448	0.589578	NA	ENSMUSG00000036949	277468	Slc39a12	2	14388316	14494977	1	protein_coding	solute carrier family 39 (zinc transporter), member 12 [Source:MGI Symbol;Acc:MGI:2139274]	transporter(PC00227)	NA	NA	ENSMUSG00000036949
ENSMUSG00000097817	1.85558	-1.13966	0.961319	-1.18551	0.235814	1	ENSMUSG00000097817	NA	Gm26810	7	30193954	30200889	1	antisense_RNA	predicted gene, 26810 [Source:MGI Symbol;Acc:MGI:5477304]	NA	NA	NA	ENSMUSG00000097817
ENSMUSG00000054556	2.31591	-1.13956	1.091	-1.04451	0.296249	1	ENSMUSG00000054556	NA	Gm4876	6	17065010	17171833	-1	antisense_RNA	predicted gene 4876 [Source:MGI Symbol;Acc:MGI:3647654]	NA	NA	NA	ENSMUSG00000054556
ENSMUSG00000050982	0.583857	-1.13738	1.81459	-0.6268	0.53079	NA	ENSMUSG00000050982	245282	Apol10a	15	77477047	77491069	1	protein_coding	apolipoprotein L 10A [Source:MGI Symbol;Acc:MGI:3036238]	apolipoprotein(PC00052)	transporter(PC00227)	NA	ENSMUSG00000050982
ENSMUSG00000104769	1.40617	-1.13656	1.23627	-0.919344	0.357916	1	ENSMUSG00000104769	NA	Igkv8-34	6	70044112	70044678	-1	IG_V_gene	immunoglobulin kappa variable 8-34 [Source:MGI Symbol;Acc:MGI:4949914]	immunoglobulin(PC00123)	NA	NA	ENSMUSG00000104769
ENSMUSG00000107760	1.06113	-1.1364	1.0312	-1.10202	0.270454	1	ENSMUSG00000107760	NA	Gm44401	6	136620632	136623006	1	TEC	predicted gene, 44401 [Source:MGI Symbol;Acc:MGI:5690793]	NA	NA	NA	ENSMUSG00000107760
ENSMUSG00000035041	5.33143	-1.13616	1.04861	-1.0835	0.278588	1	ENSMUSG00000035041	208677	Creb3l3	10	81084324	81098874	-1	protein_coding	cAMP responsive element binding protein 3-like 3 [Source:MGI Symbol;Acc:MGI:2384786]	NA	NA	NA	ENSMUSG00000035041
ENSMUSG00000093622	1.073	-1.13589	1.20027	-0.946366	0.343962	1	ENSMUSG00000093622	NA	Gm20703	17	70834664	70836044	1	antisense_RNA	predicted gene 20703 [Source:MGI Symbol;Acc:MGI:5313150]	NA	NA	NA	ENSMUSG00000093622
ENSMUSG00000106406	0.254642	-1.13572	2.97012	-0.382382	0.702178	NA	ENSMUSG00000106406	NA	Mir7682	1	151442393	151442450	1	miRNA	microRNA 7682 [Source:MGI Symbol;Acc:MGI:5562724]	NA	NA	NA	ENSMUSG00000106406
ENSMUSG00000045994	0.126408	-1.13565	5.49469	-0.206681	0.836259	NA	ENSMUSG00000045994	76898	B3gat1	9	26733728	26763101	1	protein_coding	beta-1,3-glucuronyltransferase 1 (glucuronosyltransferase P) [Source:MGI Symbol;Acc:MGI:1924148]	glycosyltransferase(PC00111)	NA	NA	ENSMUSG00000045994
ENSMUSG00000050808	0.465959	-1.13489	2.87521	-0.394716	0.693052	NA	ENSMUSG00000050808	269328	Muc15	2	110721340	110739527	1	protein_coding	mucin 15 [Source:MGI Symbol;Acc:MGI:2442110]	NA	NA	NA	ENSMUSG00000050808
ENSMUSG00000007279	2.30576	-1.13488	0.887864	-1.27821	0.201176	1	ENSMUSG00000007279	56788	Scube2	7	109798676	109865679	-1	protein_coding	signal peptide, CUB domain, EGF-like 2 [Source:MGI Symbol;Acc:MGI:1928765]	extracellular matrix glycoprotein(PC00100)	NA	NA	ENSMUSG00000007279
ENSMUSG00000116182	0.215803	-1.13333	3.52414	-0.321589	0.747764	NA	ENSMUSG00000116182	NA	NA	NA	NA	NA	NA	NA	NA	NA	NA	NA	ENSMUSG00000116182
ENSMUSG00000030125	8.12088	-1.13197	0.641412	-1.76481	0.0775949	1	ENSMUSG00000030125	16977	Lrrc23	6	124769863	124779727	-1	protein_coding	leucine rich repeat containing 23 [Source:MGI Symbol;Acc:MGI:1315192]	NA	NA	NA	ENSMUSG00000030125
ENSMUSG00000112381	2.9695	-1.13084	0.681443	-1.65948	0.0970197	1	ENSMUSG00000112381	NA	AC171183.2	10	82020551	82021495	1	processed_pseudogene		NA	NA	NA	ENSMUSG00000112381
ENSMUSG00000083642	0.534384	-1.12921	1.99604	-0.565725	0.571581	NA	ENSMUSG00000083642	NA	Gm13148	4	147745817	147746561	-1	processed_pseudogene	predicted gene 13148 [Source:MGI Symbol;Acc:MGI:3651741]	NA	NA	NA	ENSMUSG00000083642
ENSMUSG00000032558	113.435	-1.12835	0.626365	-1.80143	0.0716352	1	ENSMUSG00000032558	74025	Nphp3	9	104002544	104043818	1	protein_coding	nephronophthisis 3 (adolescent) [Source:MGI Symbol;Acc:MGI:1921275]	NA	NA	NA	ENSMUSG00000032558
ENSMUSG00000113126	3.63646	-1.12505	0.649341	-1.73261	0.0831658	1	ENSMUSG00000113126	NA	AC130827.1	13	63410918	63414767	-1	TEC		NA	NA	NA	ENSMUSG00000113126
ENSMUSG00000026824	0.770527	-1.12504	1.5868	-0.709001	0.478324	NA	ENSMUSG00000026824	16519	Kcnj3	2	55435970	55598145	1	protein_coding	potassium inwardly-rectifying channel, subfamily J, member 3 [Source:MGI Symbol;Acc:MGI:104742]	NA	NA	NA	ENSMUSG00000026824
ENSMUSG00000101166	1.25097	-1.12451	1.24036	-0.906602	0.364617	1	ENSMUSG00000101166	NA	Gm28496	7	44246726	44262720	1	processed_transcript	predicted gene 28496 [Source:MGI Symbol;Acc:MGI:5579202]	NA	NA	NA	ENSMUSG00000101166
ENSMUSG00000104519	0.341632	-1.12395	2.72184	-0.412935	0.679654	NA	ENSMUSG00000104519	NA	Gm37161	1	125919266	125921962	-1	TEC	predicted gene, 37161 [Source:MGI Symbol;Acc:MGI:5610389]	NA	NA	NA	ENSMUSG00000104519
ENSMUSG00000096322	0.27311	-1.12127	3.49263	-0.321038	0.748181	NA	ENSMUSG00000096322	NA	Gm3898	9	43820947	43832658	1	lincRNA	predicted gene 3898 [Source:MGI Symbol;Acc:MGI:3809204]	NA	NA	NA	ENSMUSG00000096322
ENSMUSG00000028488	1.07081	-1.12108	1.39954	-0.801037	0.42311	1	ENSMUSG00000028488	20404	Sh3gl2	4	85205126	85639195	1	protein_coding	SH3-domain GRB2-like 2 [Source:MGI Symbol;Acc:MGI:700009]	NA	NA	NA	ENSMUSG00000028488
ENSMUSG00000089646	2.92842	-1.12061	0.790108	-1.4183	0.156103	1	ENSMUSG00000089646	NA	Gm15796	5	38507463	38507666	1	processed_pseudogene	predicted gene 15796 [Source:MGI Symbol;Acc:MGI:3801844]	NA	NA	NA	ENSMUSG00000089646
ENSMUSG00000111857	4.38593	-1.12041	0.748973	-1.49592	0.134674	1	ENSMUSG00000111857	NA	AL603745.3	11	82974316	82975585	-1	lincRNA		NA	NA	NA	ENSMUSG00000111857
ENSMUSG00000097344	1.00599	-1.12016	1.63428	-0.685417	0.493081	1	ENSMUSG00000097344	NA	Gm26732	16	44329997	44333050	1	lincRNA	predicted gene, 26732 [Source:MGI Symbol;Acc:MGI:5477226]	NA	NA	NA	ENSMUSG00000097344
ENSMUSG00000068748	1.03537	-1.11984	1.26027	-0.888573	0.374233	1	ENSMUSG00000068748	19283	Ptprz1	6	22875502	23052916	1	protein_coding	protein tyrosine phosphatase, receptor type Z, polypeptide 1 [Source:MGI Symbol;Acc:MGI:97816]	protein phosphatase(PC00195)	receptor(PC00197)	NA	ENSMUSG00000068748
ENSMUSG00000039628	2.75836	-1.11952	0.619279	-1.80777	0.0706417	1	ENSMUSG00000039628	328779	Hs3st6	17	24753003	24758683	1	protein_coding	heparan sulfate (glucosamine) 3-O-sulfotransferase 6 [Source:MGI Symbol;Acc:MGI:3580487]	NA	NA	NA	ENSMUSG00000039628
ENSMUSG00000092365	0.296101	-1.11856	2.96818	-0.37685	0.706285	NA	ENSMUSG00000092365	NA	BC023719	17	36111426	36117121	1	antisense_RNA	cDNA sequence BC023719 [Source:MGI Symbol;Acc:MGI:3574836]	NA	NA	NA	ENSMUSG00000092365
ENSMUSG00000074892	9.33296	-1.1184	0.725584	-1.54138	0.123224	1	ENSMUSG00000074892	93961	B3galt5	16	96235801	96319859	1	protein_coding	UDP-Gal:betaGlcNAc beta 1,3-galactosyltransferase, polypeptide 5 [Source:MGI Symbol;Acc:MGI:2136878]	glycosyltransferase(PC00111)	NA	NA	ENSMUSG00000074892
ENSMUSG00000105326	0.8387	-1.11838	1.46676	-0.762483	0.445772	NA	ENSMUSG00000105326	NA	6030400A10Rik	5	43265157	43266368	1	TEC	RIKEN cDNA 6030400A10 gene [Source:MGI Symbol;Acc:MGI:1924319]	NA	NA	NA	ENSMUSG00000105326
ENSMUSG00000107318	0.594373	-1.11764	1.36348	-0.819694	0.412391	NA	ENSMUSG00000107318	NA	Gm30003	5	134747042	134822967	1	antisense_RNA	predicted gene, 30003 [Source:MGI Symbol;Acc:MGI:5589162]	NA	NA	NA	ENSMUSG00000107318
ENSMUSG00000036264	0.34321	-1.1144	3.91687	-0.284514	0.776017	NA	ENSMUSG00000036264	320027	Fstl4	11	52764634	53188538	1	protein_coding	follistatin-like 4 [Source:MGI Symbol;Acc:MGI:2443199]	protease inhibitor(PC00191)	NA	NA	ENSMUSG00000036264
ENSMUSG00000073094	1.31799	-1.11408	0.935814	-1.19049	0.233853	1	ENSMUSG00000073094	434800	Smim9	X	75146056	75163770	-1	protein_coding	small integral membrane protein 9 [Source:MGI Symbol;Acc:MGI:3588243]	NA	NA	NA	ENSMUSG00000073094
ENSMUSG00000001672	2.6635	-1.11385	0.922764	-1.20708	0.227403	1	ENSMUSG00000001672	73608	Marveld3	8	109947914	109962203	-1	protein_coding	MARVEL (membrane-associating) domain containing 3 [Source:MGI Symbol;Acc:MGI:1920858]	NA	NA	NA	ENSMUSG00000001672
ENSMUSG00000085720	0.552154	-1.1136	2.17677	-0.511587	0.60894	NA	ENSMUSG00000085720	NA	Gm7854	5	43151686	43235355	-1	antisense_RNA	predicted gene 7854 [Source:MGI Symbol;Acc:MGI:3648234]	NA	NA	NA	ENSMUSG00000085720
ENSMUSG00000001583	2.10679	-1.11337	0.954212	-1.16679	0.243295	1	ENSMUSG00000001583	83813	Tnk1	11	69851005	69858730	-1	protein_coding	tyrosine kinase, non-receptor, 1 [Source:MGI Symbol;Acc:MGI:1930958]	NA	NA	NA	ENSMUSG00000001583
ENSMUSG00000097489	1.37034	-1.11329	1.25346	-0.888173	0.374448	1	ENSMUSG00000097489	NA	Gm26808	5	109922649	109923481	-1	lincRNA	predicted gene, 26808 [Source:MGI Symbol;Acc:MGI:5477302]	NA	NA	NA	ENSMUSG00000097489
ENSMUSG00000085242	0.47851	-1.1118	1.92184	-0.57851	0.56292	NA	ENSMUSG00000085242	NA	Gm11537	11	96766802	96768269	1	antisense_RNA	predicted gene 11537 [Source:MGI Symbol;Acc:MGI:3705160]	NA	NA	NA	ENSMUSG00000085242
ENSMUSG00000096945	0.750576	-1.11052	1.39683	-0.795028	0.426597	NA	ENSMUSG00000096945	NA	Gm26546	10	88379244	88383711	-1	lincRNA	predicted gene, 26546 [Source:MGI Symbol;Acc:MGI:5477040]	NA	NA	NA	ENSMUSG00000096945
ENSMUSG00000032224	26.8721	-1.10926	0.641362	-1.72954	0.0837126	1	ENSMUSG00000032224	76886	Fam81a	9	70088511	70142560	-1	protein_coding	family with sequence similarity 81, member A [Source:MGI Symbol;Acc:MGI:1924136]	NA	NA	NA	ENSMUSG00000032224
ENSMUSG00000020658	71.2744	-1.10799	0.502122	-2.20662	0.0273409	1	ENSMUSG00000020658	668212	Efr3b	12	3962554	4038915	-1	protein_coding	EFR3 homolog B [Source:MGI Symbol;Acc:MGI:2444851]	NA	NA	NA	ENSMUSG00000020658
ENSMUSG00000069303	2.19329	-1.1065	2.24864	-0.492075	0.622666	1	ENSMUSG00000069303	665622	Hist1h2br	13	21833743	21837530	1	protein_coding	histone cluster 1 H2br [Source:MGI Symbol;Acc:MGI:3710645]	NA	NA	NA	ENSMUSG00000069303
ENSMUSG00000041842	42.7909	-1.10491	0.60726	-1.8195	0.0688349	1	ENSMUSG00000041842	229474	Fhdc1	3	84442198	84480429	-1	protein_coding	FH2 domain containing 1 [Source:MGI Symbol;Acc:MGI:2684972]	NA	NA	NA	ENSMUSG00000041842
ENSMUSG00000071757	431.558	-1.1046	0.437444	-2.52513	0.0115657	1	ENSMUSG00000071757	387609	Zhx2	15	57694665	57839832	1	protein_coding	zinc fingers and homeoboxes 2 [Source:MGI Symbol;Acc:MGI:2683087]	homeodomain transcription factor(PC00119)	nucleic acid binding(PC00171)	zinc finger transcription factor(PC00244)	ENSMUSG00000071757
ENSMUSG00000097685	0.464987	-1.10416	2.945	-0.374928	0.707714	NA	ENSMUSG00000097685	NA	Gm26646	7	79916937	79920641	1	antisense_RNA	predicted gene, 26646 [Source:MGI Symbol;Acc:MGI:5477140]	NA	NA	NA	ENSMUSG00000097685
ENSMUSG00000087216	0.339848	-1.10373	2.91891	-0.37813	0.705334	NA	ENSMUSG00000087216	NA	E130111B04Rik	11	102030268	102035084	-1	antisense_RNA	RIKEN cDNA E130111B04 gene [Source:MGI Symbol;Acc:MGI:1925104]	NA	NA	NA	ENSMUSG00000087216
ENSMUSG00000002799	105.911	-1.1035	0.43679	-2.52638	0.0115244	1	ENSMUSG00000002799	16450	Jag2	12	112907819	112929776	-1	protein_coding	jagged 2 [Source:MGI Symbol;Acc:MGI:1098270]	NA	NA	NA	ENSMUSG00000002799
ENSMUSG00000106747	1.08371	-1.10223	1.24179	-0.88761	0.374751	1	ENSMUSG00000106747	NA	Gm43025	5	68082489	68084374	-1	TEC	predicted gene 43025 [Source:MGI Symbol;Acc:MGI:5663162]	NA	NA	NA	ENSMUSG00000106747
ENSMUSG00000110768	1.16169	-1.10157	3.88623	-0.283455	0.776828	1	ENSMUSG00000110768	NA	AC160337.1	9	63898265	63898802	1	processed_pseudogene		NA	NA	NA	ENSMUSG00000110768
ENSMUSG00000073795	0.982807	-1.10097	0.973723	-1.13068	0.258188	1	ENSMUSG00000073795	381933	6430531B16Rik	7	139972303	139978755	-1	protein_coding	RIKEN cDNA 6430531B16 gene [Source:MGI Symbol;Acc:MGI:2685939]	NA	NA	NA	ENSMUSG00000073795
ENSMUSG00000090868	2.16494	-1.10091	2.17061	-0.507188	0.612023	1	ENSMUSG00000090868	NA	Trav9d-4	14	52983201	52983860	1	TR_V_gene	T cell receptor alpha variable 9D-4 [Source:MGI Symbol;Acc:MGI:4889087]	defense/immunity protein(PC00090)	NA	NA	ENSMUSG00000090868
ENSMUSG00000054582	10.1287	-1.09836	0.661826	-1.6596	0.0969958	1	ENSMUSG00000054582	381404	Pabpc1l	2	164025450	164050538	1	protein_coding	poly(A) binding protein, cytoplasmic 1-like [Source:MGI Symbol;Acc:MGI:1922908]	NA	NA	NA	ENSMUSG00000054582
ENSMUSG00000095689	1.80901	-1.09755	0.83601	-1.31284	0.189237	1	ENSMUSG00000095689	NA	Trav12d-1	14	52844465	52845041	1	TR_V_gene	T cell receptor alpha variable 12D-1 [Source:MGI Symbol;Acc:MGI:3649417]	immunoglobulin(PC00123)	NA	NA	ENSMUSG00000095689
ENSMUSG00000081695	1.38705	-1.09582	1.35457	-0.808979	0.418527	1	ENSMUSG00000081695	NA	Rpsa-ps5	11	28956724	28957608	1	processed_pseudogene	ribosomal protein SA, pseudogene 5 [Source:MGI Symbol;Acc:MGI:3650550]	NA	NA	NA	ENSMUSG00000081695
ENSMUSG00000114442	0.801668	-1.09479	1.24432	-0.87983	0.378951	NA	ENSMUSG00000114442	NA	AC159264.1	13	67278577	67283361	1	lincRNA		NA	NA	NA	ENSMUSG00000114442
ENSMUSG00000014603	1.83103	-1.09454	0.97256	-1.12542	0.260411	1	ENSMUSG00000014603	11694	Alx3	3	107595031	107605776	1	protein_coding	aristaless-like homeobox 3 [Source:MGI Symbol;Acc:MGI:1277097]	NA	NA	NA	ENSMUSG00000014603
ENSMUSG00000102286	0.297749	-1.09433	3.44108	-0.31802	0.75047	NA	ENSMUSG00000102286	NA	Gm37004	2	78972672	79098851	1	TEC	predicted gene, 37004 [Source:MGI Symbol;Acc:MGI:5610232]	NA	NA	NA	ENSMUSG00000102286
ENSMUSG00000027186	1.13267	-1.09333	1.73501	-0.630159	0.528591	1	ENSMUSG00000027186	13711	Elf5	2	103411688	103450989	1	protein_coding	E74-like factor 5 [Source:MGI Symbol;Acc:MGI:1335079]	nucleic acid binding(PC00171)	signaling molecule(PC00207)	winged helix/forkhead transcription factor(PC00246)	ENSMUSG00000027186
ENSMUSG00000085302	1.67716	-1.09295	0.85479	-1.27861	0.201033	1	ENSMUSG00000085302	NA	Trav8-2	14	53738375	53738838	1	TR_V_pseudogene	T-cell receptor alpha variable 8-2 [Source:MGI Symbol;Acc:MGI:3650859]	NA	NA	NA	ENSMUSG00000085302
ENSMUSG00000109841	4.1251	-1.09189	0.720324	-1.51583	0.129563	1	ENSMUSG00000109841	NA	E330011O21Rik	16	78250861	78302487	-1	processed_transcript	RIKEN cDNA E330011O21 gene [Source:MGI Symbol;Acc:MGI:3759668]	NA	NA	NA	ENSMUSG00000109841
ENSMUSG00000092474	0.784839	-1.09177	1.26133	-0.865573	0.386724	NA	ENSMUSG00000092474	NA	Gm20478	17	36167982	36171805	1	antisense_RNA	predicted gene 20478 [Source:MGI Symbol;Acc:MGI:5141943]	NA	NA	NA	ENSMUSG00000092474
ENSMUSG00000036766	0.374651	-1.0916	2.56469	-0.425628	0.670379	NA	ENSMUSG00000036766	227325	Dner	1	84369839	84696221	-1	protein_coding	delta/notch-like EGF repeat containing [Source:MGI Symbol;Acc:MGI:2152889]	NA	NA	NA	ENSMUSG00000036766
ENSMUSG00000112220	0.207333	-1.09041	5.13209	-0.212469	0.831741	NA	ENSMUSG00000112220	NA	AC110381.2	10	122792055	122792483	-1	antisense_RNA		NA	NA	NA	ENSMUSG00000112220
ENSMUSG00000105813	3.43897	-1.08899	0.660873	-1.6478	0.0993941	1	ENSMUSG00000105813	NA	Gm42928	3	121424236	121427574	-1	TEC	predicted gene 42928 [Source:MGI Symbol;Acc:MGI:5663065]	NA	NA	NA	ENSMUSG00000105813
ENSMUSG00000116796	2.34556	-1.08754	0.987508	-1.1013	0.270766	1	ENSMUSG00000116796	NA	NA	NA	NA	NA	NA	NA	NA	NA	NA	NA	ENSMUSG00000116796
ENSMUSG00000114893	0.716619	-1.08643	1.31811	-0.824231	0.409808	NA	ENSMUSG00000114893	NA	AC154257.2	13	107034284	107035217	1	lincRNA		NA	NA	NA	ENSMUSG00000114893
ENSMUSG00000105745	3.13381	-1.08628	0.693103	-1.56727	0.117051	1	ENSMUSG00000105745	NA	Gm42521	5	45531072	45533111	1	TEC	predicted gene 42521 [Source:MGI Symbol;Acc:MGI:5662658]	NA	NA	NA	ENSMUSG00000105745
ENSMUSG00000093559	1.04737	-1.08589	1.16388	-0.932992	0.350824	1	ENSMUSG00000093559	NA	Gm20705	6	99384607	99388499	-1	sense_intronic	predicted gene 20705 [Source:MGI Symbol;Acc:MGI:5313152]	NA	NA	NA	ENSMUSG00000093559
ENSMUSG00000086117	1.2409	-1.08525	0.967848	-1.12131	0.262158	1	ENSMUSG00000086117	NA	Gm12065	11	24198737	24202624	-1	lincRNA	predicted gene 12065 [Source:MGI Symbol;Acc:MGI:3649819]	NA	NA	NA	ENSMUSG00000086117
ENSMUSG00000054901	4.9192	-1.08458	1.36832	-0.792637	0.42799	1	ENSMUSG00000054901	381112	Arhgef33	17	80307407	80400081	1	protein_coding	Rho guanine nucleotide exchange factor (GEF) 33 [Source:MGI Symbol;Acc:MGI:2685787]	NA	NA	NA	ENSMUSG00000054901
ENSMUSG00000028177	1.56423	-1.08398	1.12627	-0.962452	0.335822	1	ENSMUSG00000028177	NA	1810013D15Rik	3	157925220	157938355	1	antisense_RNA	RIKEN cDNA 1810013D15 gene [Source:MGI Symbol;Acc:MGI:1916292]	NA	NA	NA	ENSMUSG00000028177
ENSMUSG00000107961	0.499891	-1.08376	1.92357	-0.563409	0.573156	NA	ENSMUSG00000107961	NA	Gm44036	6	86733489	86737065	1	lincRNA	predicted gene, 44036 [Source:MGI Symbol;Acc:MGI:5690428]	NA	NA	NA	ENSMUSG00000107961
ENSMUSG00000080951	0.988543	-1.0834	1.12836	-0.960159	0.336975	1	ENSMUSG00000080951	NA	Gm12208	11	52405316	52405478	1	processed_pseudogene	predicted gene 12208 [Source:MGI Symbol;Acc:MGI:3650469]	NA	NA	NA	ENSMUSG00000080951
ENSMUSG00000090074	0.33886	-1.083	2.21784	-0.488311	0.625329	NA	ENSMUSG00000090074	NA	Gm6921	8	127561435	127561869	1	processed_pseudogene	predicted pseudogene 6921 [Source:MGI Symbol;Acc:MGI:3644183]	NA	NA	NA	ENSMUSG00000090074
ENSMUSG00000114656	0.851493	-1.08298	1.10877	-0.976734	0.328701	NA	ENSMUSG00000114656	NA	AC159196.2	13	112414938	112417365	-1	lincRNA		NA	NA	NA	ENSMUSG00000114656
ENSMUSG00000086018	0.322411	-1.08178	2.93407	-0.368697	0.712353	NA	ENSMUSG00000086018	NA	Gm13179	2	4586024	4587287	-1	antisense_RNA	predicted gene 13179 [Source:MGI Symbol;Acc:MGI:3701958]	NA	NA	NA	ENSMUSG00000086018
ENSMUSG00000114382	2.55786	-1.08086	0.654789	-1.6507	0.098799	1	ENSMUSG00000114382	NA	AC130217.1	13	93073304	93074757	1	antisense_RNA		NA	NA	NA	ENSMUSG00000114382
ENSMUSG00000103636	0.99822	-1.07962	1.20404	-0.89666	0.3699	1	ENSMUSG00000103636	NA	Gm38331	1	180145481	180148151	-1	TEC	predicted gene, 38331 [Source:MGI Symbol;Acc:MGI:5611559]	NA	NA	NA	ENSMUSG00000103636
ENSMUSG00000056162	0.947049	-1.07943	1.20526	-0.895602	0.370466	1	ENSMUSG00000056162	338403	Cndp1	18	84610509	84650084	-1	protein_coding	carnosine dipeptidase 1 (metallopeptidase M20 family) [Source:MGI Symbol;Acc:MGI:2451097]	NA	NA	NA	ENSMUSG00000056162
ENSMUSG00000087449	0.927053	-1.07912	1.21678	-0.88687	0.375149	1	ENSMUSG00000087449	NA	Gm12971	4	130758563	130762379	1	sense_intronic	predicted gene 12971 [Source:MGI Symbol;Acc:MGI:3650041]	NA	NA	NA	ENSMUSG00000087449
ENSMUSG00000107317	0.556738	-1.07855	1.5939	-0.676672	0.498614	NA	ENSMUSG00000107317	NA	Gm19719	5	149282752	149287868	-1	antisense_RNA	predicted gene, 19719 [Source:MGI Symbol;Acc:MGI:5011904]	NA	NA	NA	ENSMUSG00000107317
ENSMUSG00000007888	3.91695	-1.07815	0.943963	-1.14215	0.253391	1	ENSMUSG00000007888	12931	Crlf1	8	70493158	70504081	1	protein_coding	cytokine receptor-like factor 1 [Source:MGI Symbol;Acc:MGI:1340030]	cytokine(PC00083)	defense/immunity protein(PC00090)	NA	ENSMUSG00000007888
ENSMUSG00000087405	0.293994	-1.07779	2.90961	-0.370425	0.711066	NA	ENSMUSG00000087405	NA	Gm14232	2	131159537	131171342	1	antisense_RNA	predicted gene 14232 [Source:MGI Symbol;Acc:MGI:3701956]	NA	NA	NA	ENSMUSG00000087405
ENSMUSG00000109129	12.7034	-1.0765	2.26225	-0.475854	0.634178	1	ENSMUSG00000109129	NA	Gm44973	7	5015496	5033097	1	protein_coding	predicted gene 44973 [Source:MGI Symbol;Acc:MGI:5753549]	NA	NA	NA	ENSMUSG00000109129
ENSMUSG00000082107	1.07272	-1.07645	1.16571	-0.923426	0.355785	1	ENSMUSG00000082107	NA	Gm16216	19	24289716	24290826	1	processed_pseudogene	predicted gene 16216 [Source:MGI Symbol;Acc:MGI:3801728]	NA	NA	NA	ENSMUSG00000082107
ENSMUSG00000111147	3.43931	-1.07495	0.804634	-1.33595	0.181564	1	ENSMUSG00000111147	NA	AC160562.1	9	61032212	61059116	1	lincRNA		NA	NA	NA	ENSMUSG00000111147
ENSMUSG00000096987	4.47738	-1.07455	1.01528	-1.05838	0.289883	1	ENSMUSG00000096987	NA	Gm26525	4	88784455	88794391	-1	lincRNA	predicted gene, 26525 [Source:MGI Symbol;Acc:MGI:5477019]	NA	NA	NA	ENSMUSG00000096987
ENSMUSG00000106326	12.5608	-1.07449	0.748485	-1.43556	0.151128	1	ENSMUSG00000106326	NA	Gm42977	5	56414210	56490232	1	transcribed_processed_pseudogene	predicted gene 42977 [Source:MGI Symbol;Acc:MGI:5663114]	NA	NA	NA	ENSMUSG00000106326
ENSMUSG00000024846	1.48201	-1.07431	1.71829	-0.625222	0.531825	1	ENSMUSG00000024846	73720	Cst6	19	5344705	5349574	-1	protein_coding	cystatin E/M [Source:MGI Symbol;Acc:MGI:1920970]	NA	NA	NA	ENSMUSG00000024846
ENSMUSG00000074923	4.73193	-1.07408	1.31765	-0.815148	0.414988	1	ENSMUSG00000074923	214230	Pak6	2	118663303	118698020	1	protein_coding	p21 protein (Cdc42/Rac)-activated kinase 6 [Source:MGI Symbol;Acc:MGI:2679420]	NA	NA	NA	ENSMUSG00000074923
ENSMUSG00000030301	303.137	-1.07381	0.563488	-1.90565	0.056696	1	ENSMUSG00000030301	67015	Ccdc91	6	147475828	147632612	1	protein_coding	coiled-coil domain containing 91 [Source:MGI Symbol;Acc:MGI:1914265]	NA	NA	NA	ENSMUSG00000030301
ENSMUSG00000061718	0.236302	-1.07305	4.13307	-0.259625	0.795153	NA	ENSMUSG00000061718	19049	Ppp1r1b	11	98348404	98357796	1	protein_coding	protein phosphatase 1, regulatory (inhibitor) subunit 1B [Source:MGI Symbol;Acc:MGI:94860]	phosphatase inhibitor(PC00183)	signaling molecule(PC00207)	NA	ENSMUSG00000061718
ENSMUSG00000024124	24.206	-1.0728	0.917512	-1.16925	0.242304	1	ENSMUSG00000024124	30943	Prss30	17	23972126	23975230	-1	protein_coding	protease, serine 30 [Source:MGI Symbol;Acc:MGI:1353645]	annexin(PC00050)	calmodulin(PC00061)	peptide hormone(PC00179)	ENSMUSG00000024124
ENSMUSG00000108094	1.24211	-1.07209	1.0787	-0.993867	0.320287	1	ENSMUSG00000108094	NA	Gm31108	6	143109214	143153931	-1	lincRNA	predicted gene, 31108 [Source:MGI Symbol;Acc:MGI:5590267]	NA	NA	NA	ENSMUSG00000108094
ENSMUSG00000083914	8.34846	-1.07137	0.578917	-1.85064	0.0642214	1	ENSMUSG00000083914	NA	Rps18-ps1	4	71370738	71371196	-1	processed_pseudogene	ribosomal protein S18, pseudogene 1 [Source:MGI Symbol;Acc:MGI:3650249]	NA	NA	NA	ENSMUSG00000083914
ENSMUSG00000087070	2.15837	-1.07094	1.34145	-0.798347	0.424669	1	ENSMUSG00000087070	NA	Gm12505	4	55410443	55418842	-1	lincRNA	predicted gene 12505 [Source:MGI Symbol;Acc:MGI:3651173]	NA	NA	NA	ENSMUSG00000087070
ENSMUSG00000051951	0.29527	-1.07025	2.90682	-0.368186	0.712735	NA	ENSMUSG00000051951	497097	Xkr4	1	3205901	3671498	-1	protein_coding	X-linked Kx blood group related 4 [Source:MGI Symbol;Acc:MGI:3528744]	NA	NA	NA	ENSMUSG00000051951
ENSMUSG00000006720	6.65891	-1.07001	0.473686	-2.25891	0.0238891	1	ENSMUSG00000006720	193452	Zfp184	13	21945094	21960779	1	protein_coding	zinc finger protein 184 (Kruppel-like) [Source:MGI Symbol;Acc:MGI:1922244]	NA	NA	NA	ENSMUSG00000006720
ENSMUSG00000115782	1.59642	-1.06995	1.41876	-0.754148	0.45076	1	ENSMUSG00000115782	NA	NA	NA	NA	NA	NA	NA	NA	NA	NA	NA	ENSMUSG00000115782
ENSMUSG00000005474	0.614478	-1.06947	1.25294	-0.853568	0.393344	NA	ENSMUSG00000005474	59310	Myl10	5	136693146	136701094	1	protein_coding	myosin, light chain 10, regulatory [Source:MGI Symbol;Acc:MGI:1891705]	actin family cytoskeletal protein(PC00041)	calmodulin(PC00061)	NA	ENSMUSG00000005474
ENSMUSG00000090120	1.52499	-1.06827	1.16042	-0.920587	0.357266	1	ENSMUSG00000090120	NA	A730090N16Rik	3	65324776	65349429	-1	antisense_RNA	RIKEN cDNA A730090N16 gene [Source:MGI Symbol;Acc:MGI:2442748]	NA	NA	NA	ENSMUSG00000090120
ENSMUSG00000058743	6.95139	-1.06796	0.667416	-1.60014	0.109568	1	ENSMUSG00000058743	211480	Kcnj14	7	45816460	45824782	-1	protein_coding	potassium inwardly-rectifying channel, subfamily J, member 14 [Source:MGI Symbol;Acc:MGI:2384820]	NA	NA	NA	ENSMUSG00000058743
ENSMUSG00000081275	1.81936	-1.06792	0.969849	-1.10112	0.270846	1	ENSMUSG00000081275	NA	Gm13875	2	103838954	103839235	1	processed_pseudogene	predicted gene 13875 [Source:MGI Symbol;Acc:MGI:3649350]	NA	NA	NA	ENSMUSG00000081275
ENSMUSG00000027831	3.37756	-1.0677	0.792793	-1.34676	0.178057	1	ENSMUSG00000027831	72789	Veph1	3	66053558	66296837	-1	protein_coding	ventricular zone expressed PH domain-containing 1 [Source:MGI Symbol;Acc:MGI:1920039]	NA	NA	NA	ENSMUSG00000027831
ENSMUSG00000055602	0.75602	-1.06738	1.823	-0.585509	0.558205	NA	ENSMUSG00000055602	21462	Tcp10b	17	13061104	13082481	1	protein_coding	t-complex protein 10b [Source:MGI Symbol;Acc:MGI:98542]	receptor(PC00197)	transferase(PC00220)	NA	ENSMUSG00000055602
ENSMUSG00000105624	0.651431	-1.06658	1.57595	-0.676781	0.498545	NA	ENSMUSG00000105624	NA	Gm43187	5	132490343	132492739	-1	TEC	predicted gene 43187 [Source:MGI Symbol;Acc:MGI:5663324]	NA	NA	NA	ENSMUSG00000105624
ENSMUSG00000034226	0.61426	-1.06608	1.61231	-0.661211	0.508477	NA	ENSMUSG00000034226	228543	Rhov	2	119269201	119271272	-1	protein_coding	ras homolog family member V [Source:MGI Symbol;Acc:MGI:2444227]	small GTPase(PC00208)	NA	NA	ENSMUSG00000034226
ENSMUSG00000050445	1.10218	-1.066	0.959053	-1.11152	0.266345	1	ENSMUSG00000050445	13124	Cyp8b1	9	121914356	121916305	-1	protein_coding	cytochrome P450, family 8, subfamily b, polypeptide 1 [Source:MGI Symbol;Acc:MGI:1338044]	NA	NA	NA	ENSMUSG00000050445
ENSMUSG00000110648	1.30298	-1.06589	1.34066	-0.795048	0.426586	1	ENSMUSG00000110648	NA	Gm38574	8	126981593	126982232	-1	processed_pseudogene	predicted gene, 38574 [Source:MGI Symbol;Acc:MGI:5621459]	NA	NA	NA	ENSMUSG00000110648
ENSMUSG00000086165	0.993472	-1.06549	1.09512	-0.972943	0.330582	1	ENSMUSG00000086165	NA	Gm15690	5	120479842	120480903	-1	antisense_RNA	predicted gene 15690 [Source:MGI Symbol;Acc:MGI:3783131]	NA	NA	NA	ENSMUSG00000086165
ENSMUSG00000081559	18.1095	-1.06549	0.944537	-1.12805	0.259299	1	ENSMUSG00000081559	NA	Gm12411	4	45550017	45550499	1	processed_pseudogene	predicted gene 12411 [Source:MGI Symbol;Acc:MGI:3649918]	NA	NA	NA	ENSMUSG00000081559
ENSMUSG00000105199	3.76459	-1.0651	0.916495	-1.16214	0.245178	1	ENSMUSG00000105199	NA	Gm43581	3	104642994	104645857	1	sense_intronic	predicted gene 43581 [Source:MGI Symbol;Acc:MGI:5663718]	NA	NA	NA	ENSMUSG00000105199
ENSMUSG00000115137	1.51947	-1.06501	0.779834	-1.36569	0.172035	1	ENSMUSG00000115137	NA	NA	NA	NA	NA	NA	NA	NA	NA	NA	NA	ENSMUSG00000115137
ENSMUSG00000114184	16.3618	-1.06426	0.605983	-1.75626	0.0790448	1	ENSMUSG00000114184	NA	AC122367.3	12	102866631	102867489	-1	processed_pseudogene		NA	NA	NA	ENSMUSG00000114184
ENSMUSG00000023484	4.98427	-1.0639	0.693759	-1.53353	0.125144	1	ENSMUSG00000023484	19132	Prph	15	99055174	99058978	1	protein_coding	peripherin [Source:MGI Symbol;Acc:MGI:97774]	NA	NA	NA	ENSMUSG00000023484
ENSMUSG00000114711	1.70574	-1.06377	0.720496	-1.47644	0.139825	1	ENSMUSG00000114711	NA	AC117656.2	14	15223952	15226166	-1	processed_pseudogene		NA	NA	NA	ENSMUSG00000114711
ENSMUSG00000103996	0.781456	-1.06371	1.47103	-0.723102	0.469617	NA	ENSMUSG00000103996	NA	4833421G17Rik	1	87865073	87865916	1	TEC	RIKEN cDNA 4833421G17 gene [Source:MGI Symbol;Acc:MGI:1921007]	NA	NA	NA	ENSMUSG00000103996
ENSMUSG00000062991	8.56046	-1.06363	1.06009	-1.00334	0.315695	1	ENSMUSG00000062991	211323	Nrg1	8	31814551	32884029	-1	protein_coding	neuregulin 1 [Source:MGI Symbol;Acc:MGI:96083]	growth factor(PC00112)	NA	NA	ENSMUSG00000062991
ENSMUSG00000094497	4.66679	-1.06339	1.61906	-0.656797	0.511312	1	ENSMUSG00000094497	NA	Gm8210	1	43189156	43189638	1	processed_pseudogene	predicted pseudogene 8210 [Source:MGI Symbol;Acc:MGI:3643593]	NA	NA	NA	ENSMUSG00000094497
ENSMUSG00000037705	0.910997	-1.06221	1.08182	-0.981871	0.326163	1	ENSMUSG00000037705	21683	Tecta	9	42329619	42399929	-1	protein_coding	tectorin alpha [Source:MGI Symbol;Acc:MGI:109575]	NA	NA	NA	ENSMUSG00000037705
ENSMUSG00000115129	0.303169	-1.06162	2.5102	-0.422922	0.672352	NA	ENSMUSG00000115129	NA	NA	NA	NA	NA	NA	NA	NA	NA	NA	NA	ENSMUSG00000115129
ENSMUSG00000100711	1.14142	-1.06156	1.24224	-0.854551	0.3928	1	ENSMUSG00000100711	NA	Gm29461	1	98173648	98190698	1	lincRNA	predicted gene 29461 [Source:MGI Symbol;Acc:MGI:5580167]	NA	NA	NA	ENSMUSG00000100711
ENSMUSG00000058251	0.680658	-1.06131	1.6399	-0.647181	0.517515	NA	ENSMUSG00000058251	258666	Olfr822	10	130071210	130076909	1	protein_coding	olfactory receptor 822 [Source:MGI Symbol;Acc:MGI:3030656]	NA	NA	NA	ENSMUSG00000058251
ENSMUSG00000117614	0.485944	-1.06097	2.07537	-0.511221	0.609196	NA	ENSMUSG00000117614	NA	NA	NA	NA	NA	NA	NA	NA	NA	NA	NA	ENSMUSG00000117614
ENSMUSG00000101904	0.555307	-1.06062	2.98595	-0.355203	0.722437	NA	ENSMUSG00000101904	NA	Gm29427	1	130670209	130715799	-1	protein_coding	predicted gene 29427 [Source:MGI Symbol;Acc:MGI:5580133]	NA	NA	NA	ENSMUSG00000101904
ENSMUSG00000048988	3.10935	-1.06058	1.13834	-0.931697	0.351493	1	ENSMUSG00000048988	243312	Elfn1	5	139907943	139974722	1	protein_coding	leucine rich repeat and fibronectin type III, extracellular 1 [Source:MGI Symbol;Acc:MGI:2442479]	extracellular matrix protein(PC00102)	receptor(PC00197)	NA	ENSMUSG00000048988
ENSMUSG00000106736	2.24387	-1.05925	1.32686	-0.798312	0.424689	1	ENSMUSG00000106736	NA	Gm42573	6	22245457	22245934	-1	processed_pseudogene	predicted gene 42573 [Source:MGI Symbol;Acc:MGI:5662710]	NA	NA	NA	ENSMUSG00000106736
ENSMUSG00000108460	0.781338	-1.05872	1.39604	-0.758372	0.448228	NA	ENSMUSG00000108460	NA	Gm39041	7	79299025	79302926	1	TEC	predicted gene, 39041 [Source:MGI Symbol;Acc:MGI:5621926]	NA	NA	NA	ENSMUSG00000108460
ENSMUSG00000005705	0.995304	-1.05821	1.52175	-0.695393	0.486809	1	ENSMUSG00000005705	11604	Agrp	8	105566698	105637393	-1	protein_coding	agouti related neuropeptide [Source:MGI Symbol;Acc:MGI:892013]	signaling molecule(PC00207)	NA	NA	ENSMUSG00000005705
ENSMUSG00000108601	0.674425	-1.0581	1.29273	-0.818497	0.413073	NA	ENSMUSG00000108601	NA	Gm44645	7	73422250	73423902	1	TEC	predicted gene 44645 [Source:MGI Symbol;Acc:MGI:5753221]	NA	NA	NA	ENSMUSG00000108601
ENSMUSG00000030378	0.640253	-1.05748	1.63903	-0.64519	0.518804	NA	ENSMUSG00000030378	76971	Sult2a8	7	14410686	14446769	-1	protein_coding	sulfotransferase family 2A, dehydroepiandrosterone (DHEA)-preferring, member 8 [Source:MGI Symbol;Acc:MGI:1924221]	NA	NA	NA	ENSMUSG00000030378
ENSMUSG00000037977	2.42661	-1.05726	0.78561	-1.34579	0.178371	1	ENSMUSG00000037977	235599	6430571L13Rik	9	107340602	107352422	1	protein_coding	RIKEN cDNA 6430571L13 gene [Source:MGI Symbol;Acc:MGI:2445137]	NA	NA	NA	ENSMUSG00000037977
ENSMUSG00000046378	1.51437	-1.05683	1.20285	-0.878608	0.379614	1	ENSMUSG00000046378	233879	Asphd1	7	126945567	126949582	-1	protein_coding	aspartate beta-hydroxylase domain containing 1 [Source:MGI Symbol;Acc:MGI:2685014]	NA	NA	NA	ENSMUSG00000046378
ENSMUSG00000086935	1.87308	-1.05642	1.03685	-1.01888	0.308259	1	ENSMUSG00000086935	NA	Gm15956	18	12193768	12198675	1	antisense_RNA	predicted gene 15956 [Source:MGI Symbol;Acc:MGI:3801856]	NA	NA	NA	ENSMUSG00000086935
ENSMUSG00000094969	1.08418	-1.05632	1.20183	-0.878929	0.37944	1	ENSMUSG00000094969	NA	Gm22420	17	26580802	26580927	-1	miRNA	predicted gene, 22420 [Source:MGI Symbol;Acc:MGI:5452197]	NA	NA	NA	ENSMUSG00000094969
[truncated: 51,908 more rows]

## Sheet: WT_CHK1i_vs_WT control
Gene	baseMean	log2FoldChange	lfcSE	stat	pvalue	padj	ensembl_geneid	entrez	symbol	chr	start	end	strand	biotype	description	Panther.Class.1	Panther.Class.2	Panther.Class.3	GeneID
[truncated: 53,696 more rows]

## Sheet: T505A_CHK1i_vs_T505A control
Gene	baseMean	log2FoldChange	lfcSE	stat	pvalue	padj	ensembl_geneid	entrez	symbol	chr	start	end	strand	biotype	description	Panther.Class.1	Panther.Class.2	Panther.Class.3	GeneID
[truncated: 53,696 more rows]

[truncated: 4 more sheets: c-Rel_CHK1i_vs_WT_CHK1i, T505A_CHK1i_vs_WT_CHK1i, c-Rel_control_vs_WT_control, T505A_control_vs_WT_control]
